# Supplementary material for: Readily accessible sp3-rich cyclic hydrazine frameworks exploiting nitrogen fluxionality
Source: Royal Society of Chemistry journal article supplement (doi:10.1039/c9sc04849a), 2020-01-01
Supplement: c9sc04849a1.pdf [file c9sc04849a1.pdf]

## **Readily Accessible Sp<sup>3</sup>-Rich Cyclic Hydrazine Frameworks Exploiting Nitrogen Fluxionality**

Conor Dean, Sundaram Rajkumar, Stefan Roesner, Nessa Carson, Guy J. Clarkson, Martin Wills, Matthew Jones, and Michael Shipman\*

---

## Table of Contents

|                                                                                                                                                                       |           |
|-----------------------------------------------------------------------------------------------------------------------------------------------------------------------|-----------|
| General Details .....                                                                                                                                                 | S2        |
| Experimental Procedures and Characterization Data.....                                                                                                                | S3-S64    |
| Enantiomeric Excess Determination for <b>6a-v</b> , <b>8a-v</b> , <b>10b</b> , <b>10d</b> , <b>10j</b> and <b>10o</b> by HPLC.....                                    | S65-108   |
| Copies of <sup>1</sup> H NMR and <sup>13</sup> C NMR Spectra of <b>5a-v</b> , <b>6a-v</b> , <b>8a-v</b> , <b>9a-q</b> , <b>10a-q</b> and <b>12</b> .....              | S109-213  |
| Depiction of Single Crystal X-ray Structures of <b>6a</b> , <b>8d</b> , <b>8h</b> , <b>9i</b> , <b>9m</b> , <b>10a</b> , <b>10b</b> , <b>10l</b> and <b>10o</b> ..... | S214-222  |
| LLAMA, NOESY and VT NMR data.....                                                                                                                                     | S223-S233 |
| References .....                                                                                                                                                      | S234      |

### General Details

All reactions were performed under an atmosphere of nitrogen in oven-dried glassware unless otherwise stated. Anhydrous solvents were purchased from Sigma-Aldrich or Acros Organics in Sure-Seal™ bottles for use as reaction solvents. All other solvents were reagent grade and used as received. Petroleum ether refers to the fraction that boils in the range 40-60 °C. Commercially available starting materials were used without purification.

Thin layer chromatography was performed on pre-coated aluminium-backed plates (Merck Silicagel 60 F254), visualized by UV 254 nm then stained with phosphomolybdic acid (PMA) or potassium permanganate (KMnO<sub>4</sub>) dip and heated. Flash column chromatography was performed using 40-63 µm Silica Gel.

Nuclear magnetic resonance (NMR) spectra were recorded on Bruker DPX (300 or 400 MHz) or AV (500 or 600 MHz) spectrometers. Chemical shifts (δ) are reported in parts per million (ppm) relative to the solvent residual peaks (CDCl<sub>3</sub> δ<sub>H</sub>: 7.26 ppm, δ<sub>C</sub>: 77.16 ppm; D<sub>6</sub>-DMSO δ<sub>H</sub>: 2.50 ppm, δ<sub>C</sub>: 39.52 ppm). Coupling constants (*J*) are reported in hertz (Hz). Splitting patterns are abbreviated as follows: singlet (s), doublet (d), triplet (t), quartet (q), multiplet (m), broad (br), or some combination of these.

Low-resolution mass spectra were recorded on an Agilent Technologies 6130 Quadrupole LC-MS instrument. High-resolution mass spectra were recorded using a Bruker MaXis Impact. Infrared spectra were recorded on a Perkin Elmer Spectrum 100 FT-IR spectrometer and are given in cm<sup>-1</sup>. Melting points were recorded with a Gallenkamp MPD350 apparatus and are reported as observed. Optical rotations were measured using an AA-1000 polarimeter using a 2 dm cuvette and reported as observed.

## Experimental Procedures and Characterization Data

**1-Benzyl 2-(*tert*-butyl) 1-tosylhydrazine-1,2-dicarboxylate (**4b**).** *tert*-Butyl 2-tosylhydrazine-1-carboxylate<sup>[3]</sup> (3.22 g, 11.3 mmol, 1.0 equiv), triethylamine (1.65 mL, 11.8 mmol, 1.05 equiv), 4-dimethylaminopyridine (138 mg, 1.1 mmol, 0.1 equiv) and dichloromethane (20 mL) were stirred at 0 °C. Then benzyl chloroformate (1.69 mL, 11.8 mol, 1.05 equiv) in dichloromethane (20 mL) was added via syringe pump over 1 h. The reaction mixture was then quenched with sodium hydrogen carbonate (20 mL), extracted with dichloromethane (3 x 20 mL), dried over MgSO<sub>4</sub> and concentrated *in vacuo* to give a clear oil. The crude product was purified by column chromatography (15% EtOAc/pet ether) to give **4b** (4.35 g, 10.4 mmol, 92%) as a colourless oil. *R*<sub>f</sub> = 0.12 (15% EtOAc in petroleum ether); IR (film) 3336, 2981, 1736, 1365, 1155 cm<sup>-1</sup>;  $\delta$ H (500 MHz; CDCl<sub>3</sub>) 7.92 (2H, d, *J* 8.0, Ar-*H*), 7.36-7.25 (7H, m, Ar-*H*), 6.95 and 6.63 (minor rotamer) (1H, s, NH), 5.28-5.13 (2H, m, CH<sub>2</sub>Ph), 2.44 (3H, s, CH<sub>3</sub>) 1.49 (9H, s, C(CH<sub>3</sub>)<sub>3</sub>);  $\delta$ C (125 MHz; CDCl<sub>3</sub>) 153.5 (C=O), 151.5 (C=O), 145.3 (Ar-C), 131.7 (Ar-C), 134.2 (Ar-C), 129.6 (Ar-CH), 129.2 (Ar-CH), 128.7 (Ar-CH), 128.6 (Ar-CH), 128.4 (Ar-CH), 82.8 (C), 69.6 (CH<sub>2</sub>), 28.0 (CH<sub>3</sub>), 21.7 (CH<sub>3</sub>); HRMS (ESI<sup>+</sup>) calculated for C<sub>20</sub>H<sub>24</sub>N<sub>2</sub>NaO<sub>6</sub>S [M+Na]<sup>+</sup> 443.1247; found 443.1245.

### General method 1: Synthesis of keto hydrazines using triply protected hydrazines 4a-b

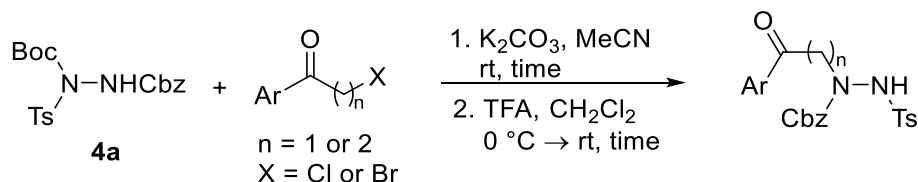

To a solution of hydrazine **4a**<sup>[1]</sup> or **4b** (1.0 equiv) in anhydrous CH<sub>3</sub>CN (0.1 M) was added halide (1.1 equiv) followed by potassium carbonate (1.1 equiv). The reaction mixture was stirred at rt until completion of the reaction (6-24 h). Water (10 mL) was then added and the mixture was extracted with dichloromethane (3 x 10 mL). The combined organic layers were washed with brine (10 mL), dried over MgSO<sub>4</sub> and concentrated *in vacuo*. The crude product was purified by column chromatography (15-40% EtOAc/ pet ether) to give the tetrasubstituted hydrazine. To this compound (1.0 equiv) in dichloromethane (0.1 M) was added trifluoroacetic acid (10 equiv) at 0 °C. After 2 h, the reaction mixture was concentrated *in vacuo*. The crude product was purified by column chromatography (15-40% EtOAc/ pet ether) to give the following compounds.

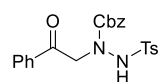

### **Benzyl 1-(2-oxo-2-phenylethyl)-2-tosylhydrazine-1-carboxylate (**5a**).**

Following general procedure 1, hydrazine **4a** (693 mg, 1.65 mmol, 1.0 equiv), 2-bromoacetophenone (360 mg, 1.81 mol, 1.1 equiv), potassium carbonate (250

mg 1.81 mmol, 1.1 equiv) and acetonitrile (17 mL, 0.1 M), then trifluoroacetic acid (1.27 mL, 16.5 mmol, 10 equiv) and dichloromethane (17 mL, 0.1 M) gave **5a** (582 mg, 1.33 mmol, 81%) as a white solid.  $R_f$  = 0.38 (30% EtOAc in petroleum ether); M.p. 123-124 °C; IR (film) 3220, 2924, 1724, 1340, 1184  $\text{cm}^{-1}$ ;  $\delta H$  (400 MHz;  $\text{CDCl}_3$ ) 7.90-7.48 (7H, m, Ar-*H*), 7.34-7.23 (4H, m, Ar-*H*), 7.14-7.04 (3H, m, Ar-*H*), 5.07 (2H, s,  $\text{CH}_2\text{Ph}$ ), 4.92 (2H, s,  $\text{NCH}_2$ ), 2.43 (major) and 2.38 (minor) (3H, s,  $\text{CH}_3$ );  $\delta C$  (100 MHz;  $\text{CDCl}_3$ ) 193.8 (C=O, rotamer), 193.4 (C=O, rotamer), 157.1 (C=O), 144.5 (Ar-C, rotamer), 144.3 (Ar-C, rotamer), 135.3 (Ar-C), 134.4 (Ar-C, rotamer), 134.3 (Ar-C, rotamer), 134.2 (Ar-CH), 133.9 (Ar-C), 129.5 (Ar-CH), 129.0 (Ar-CH), 128.7 (Ar-CH), 128.5 (Ar-CH), 128.4 (Ar-CH), 128.1 (Ar-CH), 68.8 ( $\text{CH}_2$ ), 59.1 ( $\text{NCH}_2$  rotamer), 58.2 ( $\text{NCH}_2$  rotamer), 21.8 ( $\text{CH}_3$  rotamer), 21.7 ( $\text{CH}_3$  rotamer); HRMS (ESI<sup>+</sup>) calculated for  $\text{C}_{23}\text{H}_{22}\text{N}_2\text{NaO}_5\text{S}$   $[\text{M}+\text{Na}]^+$  461.1142; found 461.1139.

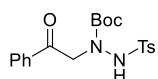

**tert-Butyl 1-(2-oxo-2-phenylethyl)-2-tosylhydrazine-1-carboxylate (5b).**

Hydrazine **4b** (310 mg, 0.74 mmol, 1.0 equiv), 2-bromoacetophenone (161 mg, 0.81 mmol, 1.1 equiv), potassium carbonate (112 mg 0.81 mmol, 1.1 equiv) and acetonitrile (8.0 mL, 0.1 M) were stirred at room temperature for 24 h. The solution was then quenched with water (10 mL), extracted with dichloromethane (3 x 10 mL), dried over  $\text{MgSO}_4$  and concentrated *in vacuo* to give a clear oil. The product was purified by column chromatography (10% EtOAc in petroleum ether) to give a white solid. This was stirred under an atmosphere of hydrogen with 3 wt% palladium on charcoal (30 mg) and ethyl acetate (3.0 mL). The reaction was carefully monitored by TLC, as over-reduction to *rac*-**6b** was seen to occur after Cbz removal. Generally the reaction was complete in approximately 2 h. The crude reaction mixture was then filtered through a plug of Celite and concentrated *in vacuo* to give a clear oil, which was purified by column chromatography (25% EtOAc in petroleum ether) to give **5b** (153 mg, 0.38 mmol, 51%) as a white solid.  $R_f$  = 0.52 (25% EtOAc in petroleum ether); M.p. 148-150 °C; IR (film) 3219, 2981, 1710, 1695, 1329, 1156  $\text{cm}^{-1}$ ;  $\delta H$  (500 MHz;  $\text{CDCl}_3$ ) 7.93 (2H, d,  $J$  7.4, Ar-*H*), 7.85 (2H, d,  $J$  8.2, Ar-*H*), 7.64 (1H, q,  $J$  8.0, Ar-*H*), 7.55-7.49 (2H, m, Ar-*H*), 7.41-7.30 (2H, m, Ar-*H*), 7.21 and 7.00 (minor rotamer) (1H, s, NH), 5.01 (2H, s,  $\text{CH}_2\text{N}$ ), 2.50-2.42 (3H, m,  $\text{CH}_3$ ), 1.20 and 1.15 (minor rotamer) (9H, s,  $\text{C}(\text{CH}_3)_3$ );  $\delta C$  (125 MHz;  $\text{CDCl}_3$ ) 193.9 (minor rotamer) and 193.6 (C=O), 155.6 and 154.7 (minor rotamer, C=O), 144.5 (minor rotamer) and 144.4 (Ar-C), 134.5 (Ar-C), 134.0 (Ar-CH), 133.6 (Ar-C), 134.2 (Ar-CH), 133.9 (Ar-C), 129.7 (minor rotamer) and 129.3 (Ar-CH), 128.9 and 128.7 (minor rotamer, Ar-CH), 128.8 and 128.6 minor rotamer, Ar-CH, 128.0 (minor rotamer) and 127.9 (Ar-CH), 83.1 (minor rotamer) and 82.8 (C), 58.9, and 58.1 (minor rotamer,  $\text{CH}_2$ ), 27.6 and 27.5 (minor rotamer,  $\text{CH}_3$ ), 21.6 ( $\text{CH}_3$ ); HRMS (ESI<sup>+</sup>) calculated for  $\text{C}_{20}\text{H}_{24}\text{N}_2\text{NaO}_5\text{S}$   $[\text{M}+\text{Na}]^+$  427.1298; found 427.1296.



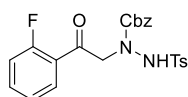

### Benzyl

### 1-(2-(2-fluorophenyl)-2-oxoethyl)-2-tosylhydrazine-1-

**carboxylate (5c).** Following general procedure 1, hydrazine **4a** (300 mg, 0.72 mmol, 1.0 equiv), 2-bromo-2'-fluoroacetophenone (171 mg, 0.79 mmol, 1.1 equiv), potassium carbonate (109 mg, 0.79 mmol, 1.1 equiv) and acetonitrile (8.0 mL, 0.1 M), then trifluoroacetic acid (555  $\mu$ L, 7.20 mmol, 10 equiv) and dichloromethane (8.0 mL, 0.1 M) gave **5c** (204 mg, 0.45 mmol, 62%) as a white solid.  $R_f$  = 0.21 (15% EtOAc in petroleum ether); M.p. 122-123  $^{\circ}$ C; IR (film) 3211, 2966, 1721, 1693, 1609, 1499, 1255, 1200  $\text{cm}^{-1}$ ;  $\delta H$  (600 MHz; D<sub>6</sub>-DMSO at 100  $^{\circ}$ C) 9.97 (1H, s, NH), 7.80 (1H, t,  $J$  7.5 Ar- $H$ ), 7.73-7.67 (3H, m, Ar- $H$ ), 7.38-7.27 (7H, m, Ar- $H$ ), 7.21-7.14 (2H, m, Ar- $H$ ), 4.84 (2H, s, CH<sub>2</sub>Ph), 4.81 (2H, s, NCH<sub>2</sub>) 2.36 (3H, s, CH<sub>3</sub>);  $\delta C$  (150 MHz, D<sub>6</sub>-DMSO at 100  $^{\circ}$ C) 144.0 (Ar-C), 136.1 (d,  $J$  9.0, Ar-CH) 130.6 (Ar-CH), 129.7 (Ar-CH), 128.5 (Ar-CH), 128.2 (Ar-CH), 128.2 (Ar-CH), 127.8 (Ar-CH), 125.4 (Ar-CH), 117.2 (d,  $J$  24 Ar-CH), 68.0 (CH<sub>2</sub>), 61.7 (CH<sub>2</sub>), 21.4 (CH<sub>3</sub>), 2 C=O, 4 Ar-C not seen;  $\delta F$  (376 MHz, D<sub>6</sub>-DMSO) -108.8 (C-F); HRMS (ESI<sup>+</sup>) calculated for C<sub>23</sub>H<sub>21</sub>FN<sub>2</sub>O<sub>5</sub>S [M+Na]<sup>+</sup> 479.1047; found 479.1048.

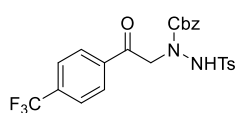

### Benzyl

### 1-(2-oxo-2-(4-(trifluoromethyl)phenyl)ethyl)-2-

**tosylhydrazine-1-carboxylate (5d).** Following general procedure 1, hydrazine **4a** (300 mg, 0.72 mmol, 1.0 equiv), 2-bromo-4'-(trifluoromethyl)acetophenone (211 mg, 0.79 mmol, 1.1 equiv), potassium carbonate (109 mg, 0.79 mmol, 1.1 equiv) and acetonitrile (8.0 mL, 0.1 M), then trifluoroacetic acid (555  $\mu$ L, 7.20 mmol, 10 equiv) and dichloromethane (8.0 mL, 0.1 M) gave **5d** (204 mg, 0.40 mmol, 56%) as a white solid.  $R_f$  = 0.19 (15% EtOAc in petroleum ether); M.p. 203-205  $^{\circ}$ C. IR (film) 3263, 2925, 1710, 1687, 1324, 830, 811  $\text{cm}^{-1}$ ;  $\delta H$  (500 MHz; CDCl<sub>3</sub>) 8.05-7.97 (2H, m, Ar- $H$ ), 7.81-7.68 (4H, m, Ar- $H$ ), 7.36-7.03 (7H, m, Ar- $H$ ), 5.11-4.87 (4H, m, NCH<sub>2</sub> and CH<sub>2</sub>Ph), 2.43 and 2.39 (minor rotamer) (3H, s, CH<sub>3</sub>);  $\delta C$  (125 MHz, CDCl<sub>3</sub>) 192.4 (C=O, seen on HMBC), 144.0 (Ar-C, seen on HMBC), 136.7 (Ar-C, seen on HMBC), 135.5 (Ar-C), 129.6 (Ar-CH), 128.6 (Ar-CH), 128.5 (Ar-CH), 128.4 (Ar-CH), 128.1 (Ar-CH), 128.0 (Ar-CH), 126.0 (Ar-CH), 68.9 (CH<sub>2</sub>), 59.1 (CH<sub>2</sub>) and 58.3 (CH<sub>2</sub>, minor rotamer), 21.8 (CH<sub>3</sub>), CF<sub>3</sub>, 2 Ar-C and C=O not seen;  $\delta F$  (376 MHz; CDCl<sub>3</sub>) -63.3 (CF<sub>3</sub>); HRMS (ESI<sup>+</sup>) calculated for C<sub>24</sub>H<sub>21</sub>F<sub>3</sub>N<sub>2</sub>O<sub>5</sub>S [M+Na]<sup>+</sup> 529.1015; found 529.1016.

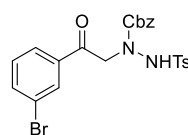

### Benzyl

### 1-(2-(3-bromophenyl)-2-oxoethyl)-2-tosylhydrazine-1-

**carboxylate (5e).** Following general procedure 1, hydrazine **4a** (300 mg, 0.72 mmol, 1.0 equiv), 2,3'-bromoacetophenone (220 mg, 0.79 mmol, 1.1 equiv), potassium carbonate (109 mg, 0.79 mmol, 1.1 equiv) and acetonitrile (8.0 mL, 0.1 M), then trifluoroacetic acid (555  $\mu$ L, 7.20 mmol, 10 equiv) and

dichloromethane (8.0 mL, 0.1 M) gave **5e** (201 mg, 0.39 mmol, 54%) as a white solid.  $R_f$  = 0.18 (15% EtOAc in petroleum ether); M.p. 131-133 °C. IR (film) 3230, 2964, 2919, 1719, 1682, 1494, 1343, 1215  $\text{cm}^{-1}$ ;  $\delta H$  (500 MHz;  $\text{CDCl}_3$ ) 8.03 (1H, d,  $J$  8.3, Ar- $H$ ), 7.86-7.68 (4H, m, Ar- $H$ ), 7.41-7.02 (8H, m, Ar- $H$ ), 5.09-4.85 (4H, m,  $\text{NCH}_2$  and  $\text{CH}_2\text{Ph}$ ), 2.43 and 2.39 (minor rotamer) (3H, s,  $\text{CH}_3$ );  $\delta C$  (125 MHz,  $\text{CDCl}_3$ ) 192.1 (C=O), 156.8 (C=O), 144.6 (Ar-C), 137.0 (Ar-CH), 131.1 (Ar-CH), 130.5 (Ar-CH), 129.5 (Ar-CH), 128.6 (Ar-CH), 128.5 (Ar-CH), 128.4 (Ar-CH), 128.0 (Ar-CH), 126.5 (Ar-CH), 123.3 (Ar-C), 68.9 ( $\text{CH}_2$ ), 58.9 ( $\text{CH}_2$ ) and 58.1 ( $\text{CH}_2$ , minor rotamer), 21.8 ( $\text{CH}_3$ ), 3 Ar-C not seen; HRMS ( $\text{ESI}^+$ ) calculated for  $\text{C}_{23}\text{H}_{21}^{79}\text{BrN}_2\text{O}_5\text{S}$   $[\text{M}+\text{Na}]^+$  539.0247; found 539.0240.

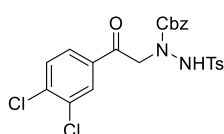

**Benzyl 1-(2-(3,4-dichlorophenyl)-2-oxoethyl)-2-tosylhydrazine-1-carboxylate (5f).** Following general procedure 1, hydrazine **4a** (204 mg, 0.76 mmol, 1.0 equiv), 2-bromo-3',4'-dichloroacetophenone (212 mg, 0.79 mmol, 1.1 equiv), potassium carbonate (109 mg, 0.79 mmol, 1.1

equiv) and acetonitrile (8.0 mL, 0.1 M), then trifluoroacetic acid (586  $\mu\text{L}$ , 7.60 mmol, 10 equiv) and dichloromethane (8.0 mL, 0.1 M) gave **5f** (157 mg, 0.31 mmol, 41%) as a white solid.  $R_f$  = 0.22 (15% EtOAc in petroleum ether); M.p. 174-177 °C. IR (film) 3257, 2928, 1710, 1421, 1183  $\text{cm}^{-1}$ ;  $\delta H$  (500 MHz;  $\text{CDCl}_3$ ) 7.97 (1H, d,  $J$  8.9, Ar- $H$ ), 7.81-7.67 (3H, m, Ar- $H$ ), 7.58 (1H, d,  $J$  8.2, Ar- $H$ ), 7.37-7.01 (7H, m, Ar- $H$ ), 5.07-4.87 (4H, m,  $\text{NCH}_2$  and  $\text{CH}_2\text{Ph}$ ), 2.43 and 2.39 (minor rotamer) (3H, s,  $\text{CH}_3$ );  $\delta C$  (125 MHz,  $\text{CDCl}_3$ ) 191.8 (C=O, major rotamer), 191.4 (C=O, minor rotamer), 156.7 (C=O), 144.7 (Ar-C), 138.9 (Ar-C), 133.8 (Ar-C), 133.7 (Ar-C), 131.1 (Ar-CH), 130.0 (Ar-CH), 129.6 (Ar-CH), 128.6 (Ar-CH), 128.5 (Ar-CH), 128.1 (Ar-CH), 126.9 (Ar-CH), 68.9 ( $\text{CH}_2$ ), 58.8 ( $\text{CH}_2$ , major rotamer), 58.0 ( $\text{CH}_2$ , minor rotamer), 21.8 ( $\text{CH}_3$ ), 2 Ar-C not seen; HRMS ( $\text{ESI}^+$ ) calculated for  $\text{C}_{23}\text{H}_{20}^{35}\text{Cl}_2\text{N}_2\text{O}_5\text{S}$   $[\text{M}+\text{Na}]^+$  529.0362; found 529.0357.

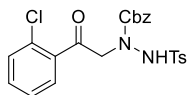

**Benzyl 1-(2-(2-chlorophenyl)-2-oxoethyl)-2-tosylhydrazine-1-carboxylate (5g).** Following general procedure 1, hydrazine **4a** (300 mg, 0.72 mmol, 1.0 equiv), 2-bromo-2'-chloroacetophenone (184 mg, 0.79 mmol, 1.1

equiv), potassium carbonate (109 mg, 0.79 mmol, 1.1 equiv) and acetonitrile (7.2 mL, 0.1 M), then trifluoroacetic acid (555  $\mu\text{L}$ , 7.20 mmol, 10 equiv) and dichloromethane (7.2 mL, 0.1 M) gave **5g** (191 mg, 0.40 mmol, 56%) as a white solid.  $R_f$  = 0.42 (25% EtOAc in petroleum ether); M.p. 89-93 °C; IR (film) 3195, 2941, 1728, 1704, 1417, 1382, 1219  $\text{cm}^{-1}$ ;  $\delta H$  (500 MHz;  $d_6$ -DMSO) 10.63 and 10.52 (minor rotamer) (1H, s, NH), 7.76-7.43 (5H, m, Ar- $H$ ), 7.36-7.10 (8H, m, Ar- $H$ ), 5.15-4.35 (4H, m,  $\text{NCH}_2$  and  $\text{CH}_2\text{Ph}$ ), 2.30 (3H, s,  $\text{CH}_3$ );  $\delta C$  (125 MHz,  $d_6$ -DMSO) 195.7 (C=O), 155.6 (C=O), 144.0 (Ar-C), 137.8 (Ar-C), 136.1 (Ar-C), 135.8 (Ar-C), 133.8 (Ar-CH), 131.2 (Ar-CH), 130.8 (Ar-C), 130.2 (Ar-CH), 129.8 (Ar-CH), 129.4 (Ar-

CH), 128.7 (Ar-CH), 128.1 (Ar-CH), 127.8 (Ar-CH), 125.8 (Ar-CH), 67.8 (CH<sub>2</sub>), 60.8 (CH<sub>2</sub>), 21.6 (CH<sub>3</sub>); HRMS (ESI<sup>+</sup>) calculated for C<sub>23</sub>H<sub>21</sub><sup>35</sup>ClN<sub>2</sub>O<sub>5</sub>S [M+Na]<sup>+</sup> 495.0752; found 495.0737.

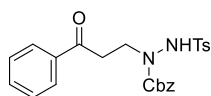

**Benzyl 1-(3-oxo-3-phenylpropyl)-2-tosylhydrazine-1-carboxylate (5h).**

Following general procedure 1, hydrazine **4a** (300 mg, 0.72 mmol, 1.0 equiv), 3-chloropropiophenone (133 mg, 0.79 mmol, 1.1 equiv), potassium carbonate (109 mg, 0.79 mmol, 1.1 equiv) and acetonitrile (7.2 mL, 0.1 M), then trifluoroacetic acid (555  $\mu$ L, 7.20 mmol, 10 equiv) and dichloromethane (7.2 mL, 0.1 M) gave **5h** (293 mg, 0.65 mmol, 90%) as a white solid. *R<sub>f</sub>* = 0.20 (15% EtOAc in petroleum ether); M.p. 122-123 °C; IR (film) 3231, 3034, 1702, 1666, 1380, 1307, 1184 cm<sup>-1</sup>;  $\delta$ *H* (500 MHz; CDCl<sub>3</sub>) 7.95 (2H, d, *J* 7.8 Ar-H), 7.75 (2H, d, *J* 8.0, Ar-H), 7.60 (1H, t, *J* 7.3, Ar-H), 7.49 (2H, t, *J* 7.6, Ar-H), 7.33 (3H, d, *J* 4.9, Ar-H), 7.22 (2H, d, *J* 8.0, Ar-H), 7.15 (2H, s, Ar-H), 4.91 (2H, br s, CO<sub>2</sub>CH<sub>2</sub>), 4.08 (2H, br s, NCH<sub>2</sub>), 3.40 (2H, br s, COCH<sub>2</sub>), 2.42 (3H, s, Ar-CH<sub>3</sub>);  $\delta$ *C* (125 MHz, CDCl<sub>3</sub>) 198.3 (C=O, seen on HMBC), 144.5 (Ar-C), 136.4 (Ar-C), 135.2 (Ar-C), 133.5 (Ar-CH), 129.6 (Ar-CH), 128.7 (Ar-CH), 128.5 (Ar-CH), 128.4 (Ar-CH), 128.1 (Ar-CH), 128.1 (Ar-CH), 68.5 (CH<sub>2</sub>), 46.8 (CH<sub>2</sub>), 35.9 (CH<sub>2</sub>), 21.7 (CH<sub>3</sub>), 1 C=O, 1 Ar-H and 1 Ar-C not seen; HRMS (ESI<sup>+</sup>) calculated for C<sub>24</sub>H<sub>24</sub>N<sub>2</sub>O<sub>5</sub>S [M+Na]<sup>+</sup> 475.1298; found 475.1302.

**General method 2: Synthesis of keto hydrazines using diprotected hydrazines**

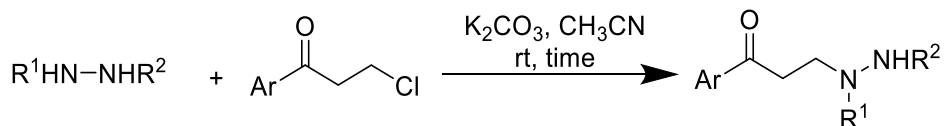

To a solution of protected hydrazine (1.0 equiv) in acetonitrile (0.1 M) was added the organic halide (1.0 equiv) followed by potassium carbonate (1.1 equiv). The reaction mixture was stirred at rt until completion of the reaction (6-24 h, monitored by TLC). Water (10 mL) was then added and the mixture was extracted with dichloromethane (3 x 10 mL). The combined organic layers were washed with brine (10 mL), dried over MgSO<sub>4</sub> and concentrated *in vacuo*. The crude product was purified by column chromatography (30-40% EtOAc/ pet ether) to give the following compounds.

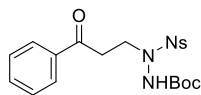

**tert-Butyl**

**2-((4-nitrophenyl)sulfonyl)-2-(3-oxo-3-**

**phenylpropyl)hydrazine-1-carboxylate (5i).**

Following general method 2, *tert*-butyl 2-((4-nitrophenyl)sulfonyl)hydrazine-1-carboxylate<sup>[2]</sup> (250 mg, 0.79 mmol, 1.0 equiv), acetonitrile (7.9 mL, 0.1 M), 3-chloropropiophenone (133 mg, 0.83 mmol, 1.05 equiv) and potassium carbonate (112 mg, 0.87 mmol, 1.1 equiv) yielded **5i** as a white solid (249 mg, 0.56 mmol, 70%). *R<sub>f</sub>* = 0.39 (25% EtOAc in petroleum ether); M.p; 157-159 °C; IR (film) 3316, 2984, 1735, 1679, 1526, 1317, 1208 cm<sup>-1</sup>;  $\delta$ *H* (500 MHz; CDCl<sub>3</sub>) 7.80

(4H, t,  $J$  9.1, Ar-CH), 7.61 (2H, d,  $J$  8.3, Ar-CH), 7.32 (2H, d,  $J$  7.8, Ar-CH), 6.36 (1H, br s, NH), 3.88 (2H, br s, COCH<sub>2</sub>), 3.34 (2H, t,  $J$  6.3, CH<sub>2</sub>NNs), 1.27 (9H, br s, C(CH<sub>3</sub>)<sub>3</sub>);  $\delta$ C (125 MHz, CDCl<sub>3</sub>) 197.0 (C=O, seen on HMBC), 196.6 (C=O, seen on HMBC), 144.6 (Ar-C), 135.1 (Ar-C), 133.8 (Ar-C), 132.0 (Ar-CH), 129.7 (Ar-CH), 129.6 (Ar-CH), 128.7 (Ar-CH), 128.6 (Ar-CH), 81.8 (C), 46.2 (NCH<sub>2</sub>), 37.3 (CH<sub>2</sub>), 27.9 (CH<sub>3</sub>), 1 C=O not seen; HRMS (ESI<sup>+</sup>) calculated for C<sub>21</sub>H<sub>25</sub><sup>79</sup>BrN<sub>2</sub>O<sub>5</sub>S [M+Na]<sup>+</sup> 519.0560; found 519.0564.

***tert*-Butyl 2-(3-oxo-3-phenylpropyl)-2-tosylhydrazine-1-carboxylate (5j).**

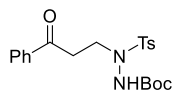

Following general method 2, *tert*-butyl 2-tosylhydrazine-1-carboxylate<sup>[3]</sup> (100 mg, 0.35 mmol, 1.0 equiv), acetonitrile (3.5 mL, 0.1 M), 3-chloropropiophenone (59 mg, 0.35 mmol, 1.0 equiv) and potassium carbonate (48 mg, 0.35 mmol, 1.0 equiv) yielded **5j** as a white solid (139 mg, 0.33 mmol, 95%).  $R_f$  = 0.29 (30% EtOAc in petroleum ether); M.p. 136-137.5 °C; IR (film) 2986, 2900, 1451, 1250, 1066 cm<sup>-1</sup>;  $\delta$ H (400 MHz; CDCl<sub>3</sub>) 7.95-7.78 (4H, m, Ar-*H*), 7.59-7.26 (5H, m, Ar-*H*), 6.38 (major) and 6.03 (minor) (1H, br s, NH), 3.89 (2H, br s, NCH<sub>2</sub>), 3.38 (2H, t,  $J$  6.2, CH<sub>2</sub>CO), 2.42 (3H, s, CH<sub>3</sub>), 1.26 (9H, s, (CH<sub>3</sub>)<sub>3</sub>);  $\delta$ C (125 MHz; CDCl<sub>3</sub>) 198.0 (C=O, seen on HMBC), 144.6 (Ar-C), 136.5 (Ar-C), 133.9 (Ar-C), 133.6 (Ar-CH), 129.8 (Ar-CH), 128.7 (Ar-CH), 128.2 (Ar-CH), 81.8 (C), 46.4 (NCH<sub>2</sub>), 37.4 (CH<sub>2</sub>), 28.0 (Boc-CH<sub>3</sub>), 21.7 (CH<sub>3</sub>), 1 Ar-CH and 1 C=O not seen; HRMS (ESI<sup>+</sup>) calculated for C<sub>21</sub>H<sub>26</sub>N<sub>2</sub>NaO<sub>5</sub>S [M+Na]<sup>+</sup> 441.1455; found 441.1459.

***tert*-Butyl**

**2-(3-([1,1'-biphenyl]-4-yl)-3-oxopropyl)-2-**

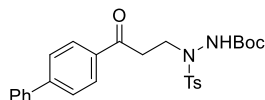

**tosylhydrazine-1-carboxylate (5k).**

Following general method 2, *tert*-butyl 2-tosylhydrazine-1-carboxylate<sup>[3]</sup> (500 mg, 1.75 mmol, 1.00 equiv), acetonitrile (17.5 mL, 0.1 M), 1-([1,1'-biphenyl]-4-yl)-3-chloropropan-1-one<sup>[4]</sup> (470 mg, 1.92 mmol, 1.1 equiv) and potassium carbonate (265 mg, 1.92 mmol, 1.1 equiv) yielded **5k** as a white solid (635 mg, 1.28 mmol, 73%). M.p. 156-157 °C;  $R_f$  = 0.34 (25% EtOAc in petroleum ether); IR (film) 3299, 2983, 2900, 1718, 1660, 1603, 1380, 1252 cm<sup>-1</sup>;  $\delta$ H (500 MHz; CDCl<sub>3</sub>) 8.04 (2H, d,  $J$  8.3, Ar-*H*), 7.82 (2H, d,  $J$  8.2, Ar-*H*), 7.71 (2H, d,  $J$  8.2, Ar-*H*), 7.65 (2H, d,  $J$  7.4, Ar-*H*), 7.50 (2H, t,  $J$  7.5, Ar-*H*), 7.43 (1H, t,  $J$  7.3, Ar-*H*), 7.35 (2H, d,  $J$  7.8, Ar-*H*), 3.93 (2H, br s, COCH<sub>2</sub>), 3.43 (2H, t,  $J$  6.1, CH<sub>2</sub>NTs), 2.45 (3H, s, CH<sub>3</sub>), 1.59 (9H, s, C(CH<sub>3</sub>)<sub>3</sub>);  $\delta$ C (125 MHz, CDCl<sub>3</sub>) 197.6 (C=O, seen on HMBC), 146.1 (Ar-C), 144.5 (Ar-C), 139.8 (Ar-C), 135.1 (Ar-C), 129.7 (Ar-CH), 129.6 (Ar-C, seen on HMBC), 129.0 (Ar-CH), 128.7 (Ar-CH), 128.6 (Ar-CH), 128.3 (Ar-CH), 127.3 (Ar-CH), 127.3 (Ar-CH), 81.5 (C, seen on HMBC), 46.4 (NCH<sub>2</sub>), 41.4 (CH<sub>2</sub>), 27.9 (CH<sub>3</sub>), 21.6 (CH<sub>3</sub>), 1 C=O not seen; HRMS (ESI<sup>+</sup>) calculated for C<sub>27</sub>H<sub>30</sub>N<sub>2</sub>O<sub>5</sub>S [M+Na]<sup>+</sup> 517.1768; found 517.1771.

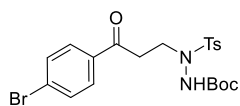

**tert-Butyl 2-(3-(4-bromophenyl)-3-oxopropyl)-2-tosylhydrazine-1-carboxylate (5l).** Following general method 2, *tert*-butyl 2-tosylhydrazine-1-carboxylate<sup>[3]</sup> (150 mg, 0.52 mmol, 1.0 equiv),

acetonitrile (5.2 mL, 0.1 M), 4'-bromo-3-chloropropiophenone (129 mg, 0.52 mmol, 1.0 equiv) and potassium carbonate (75 mg, 0.55 mmol, 1.05 equiv) yielded **5l** as a white solid (216 mg, 0.44 mmol, 85%).  $R_f$  = 0.29 (25% EtOAc in petroleum ether); M.p. 165-166 °C; IR (film) 3267, 2975, 2927, 1732, 1714, 1368, 1159  $\text{cm}^{-1}$ ;  $\delta H$  (500 MHz;  $\text{CDCl}_3$ ) 7.80 (4H, t,  $J$  9.1, Ar-CH), 7.61 (2H, d,  $J$  8.3, Ar-CH), 7.32 (2H, d,  $J$  7.8, Ar-CH), 6.36 (1H, br s, NH), 3.88 (2H, br s,  $\text{COCH}_2$ ), 3.34 (2H, t,  $J$  6.3,  $\text{CH}_2\text{NTs}$ ), 2.43 (3H, s, Ar- $\text{CH}_3$ ) 1.27 (9H, br s,  $\text{C}(\text{CH}_3)_3$ );  $\delta C$  (125 MHz,  $\text{CDCl}_3$ ) 197.0 (C=O, seen on HMBC), 196.6 (C=O, seen on HMBC), 144.6 (Ar-C), 135.1 (Ar-C), 133.8 (Ar-C), 132.0 (Ar-CH), 129.7 (Ar-CH), 129.6 (Ar-CH), 128.7 (Ar-C), 128.6 (Ar-CH), 81.8 (C), 46.2 ( $\text{NCH}_2$ ), 37.3 ( $\text{CH}_2$ ), 27.9 ( $\text{CH}_3$ ), 21.6 ( $\text{CH}_3$ ), 1 C=O not seen; HRMS (ESI<sup>+</sup>) calculated for  $\text{C}_{21}\text{H}_{25}^{79}\text{BrN}_2\text{O}_5\text{S}$   $[\text{M}+\text{Na}]^+$  519.0560; found 519.0564.

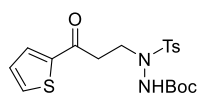

**tert-Butyl 2-(3-oxo-3-(thiophen-2-yl)propyl)-2-tosylhydrazine-1-carboxylate (5m).** Following general method 2, *tert*-butyl 2-tosylhydrazine-1-carboxylate<sup>[3]</sup> (200 mg, 0.70 mmol, 1.0 equiv), acetonitrile (7.0 mL, 0.1 M),

3-chloro-1-(thiophen-2-yl)propan-1-one (123 mg, 0.70 mmol, 1.0 equiv) and potassium carbonate (102 mg, 0.74 mmol, 1.05 equiv) yielded **5m** as a pale yellow solid (222 mg, 0.52 mmol, 75%).  $R_f$  = 0.38 (25% EtOAc in petroleum ether); M.p. 39-40 °C; IR (film) 3320, 2978, 1718, 1654, 1347, 1237, 1152  $\text{cm}^{-1}$ ;  $\delta H$  (500 MHz;  $\text{CDCl}_3$ ) 7.80 (2H, t,  $J$  8.2, Ar-H), 7.76 (2H, d,  $J$  3.4, Ar-H), 7.68 (2H, d,  $J$  4.8, Ar-H), 7.16 (1H, t,  $J$  4.3, Ar-H), 6.35 (1H, br s, NH), 3.90 (2H, br s,  $\text{COCH}_2$ ), 3.33 (2H, t,  $J$  6.3,  $\text{CH}_2\text{NTs}$ ), 2.45 (3H, s,  $\text{CH}_3$ ) 1.28 (9H, br s,  $\text{C}(\text{CH}_3)_3$ );  $\delta C$  (125 MHz,  $\text{CDCl}_3$ ) 190.9 (C=O, seen on HMBC), 144.5 (Ar-C), 143.7 (Ar-C), 134.2 (Ar-CH), 132.6 (Ar-CH), 129.7 (Ar-CH), 129.6 (Ar-C, seen on HMBC), 128.6 (Ar-CH), 128.3 (Ar-CH), 81.7 (C), 46.3 ( $\text{NCH}_2$ ), 38.0 ( $\text{CH}_2$ ), 27.8 ( $\text{CH}_3$ ), 21.6 ( $\text{CH}_3$ ), Ar-CH and 1 C=O not seen; HRMS (ESI<sup>+</sup>) calculated for  $\text{C}_{19}\text{H}_{24}\text{N}_2\text{O}_5\text{S}_2$   $[\text{M}+\text{Na}]^+$  447.1018; found 447.1021.

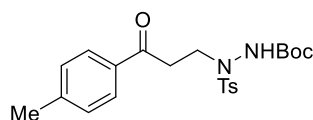

**tert-Butyl 2-(3-oxo-3-(*p*-tolyl)propyl)-2-tosylhydrazine-1-carboxylate (5n).** Following general method 2, *tert*-butyl 2-tosylhydrazine-1-carboxylate<sup>[3]</sup> (2.59 g, 9.03 mmol, 1.0 equiv),

acetonitrile (90 mL, 0.1 M), 3-chloro-1-(*p*-tolyl)propan-1-one<sup>[5]</sup> (1.65 g, 9.03 mmol, 1.0 equiv) and potassium carbonate (1.37 g, 9.93 mmol, 1.1 equiv) yielded **5n** after purification by column chromatography (33% EtOAc in petroleum ether) as a white solid (3.41 g, 7.88 mmol, 79%). M.p. 146-147 °C;  $R_f$  = 0.17 (33% EtOAc in petroleum ether); IR (neat) 3314, 1719, 1667, 1346, 1154, 1101, 1023, 973, 813, 775, 739  $\text{cm}^{-1}$ ;  $\delta H$  (400 MHz;  $\text{CDCl}_3$ ) 7.83 (2H, d,  $J$  8.2, Ar- $H$ ), 7.78 (2H, d,  $J$  8.2, Ar- $H$ ), 7.30 (2H, d,  $J$  8.0, Ar- $H$ ), 7.24 (2H, d,  $J$  8.0, Ar- $H$ ), 6.41

(0.74H, br s, NH major), 6.09 (0.26H, br s, NH minor), 3.86 (2H, br s, NCH<sub>2</sub>), 3.34 (2H, t, *J* 6.8, CH<sub>2</sub>CO), 2.41 (3H, s, CH<sub>3</sub>), 2.40 (3H, s, CH<sub>3</sub>), 1.26 (9H, s, (CH<sub>3</sub>)<sub>3</sub>);  $\delta$ C (101 MHz; CDCl<sub>3</sub>) 199.9 (C=O, seen on HMBC), 144.5 (Ar-C), 144.4 (Ar-C), 134.1 (Ar-C), 134.1 (Ar-C), 129.8 (Ar-CH), 129.5 (Ar-CH), 128.7 (Ar-CH), 128.3 (Ar-CH), 81.7 (C, seen on HMBC), 46.5 (NCH<sub>2</sub>), 37.2 (CH<sub>2</sub>CO), 28.0 (Boc-CH<sub>3</sub>), 21.8 (CH<sub>3</sub>), 21.7 (CH<sub>3</sub>), Boc-C=O not observed; HRMS (ESI<sup>+</sup>) calculated for C<sub>22</sub>H<sub>28</sub>N<sub>2</sub>NaO<sub>5</sub>S [M+Na]<sup>+</sup> 455.1611; found 455.1612.

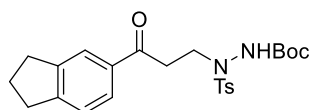

**tert-Butyl 2-(3-(2,3-dihydro-1H-inden-5-yl)-3-oxopropyl)-2-tosylhydrazine-1-carboxylate (5o).**

Following general method 2, *tert*-butyl 2-tosylhydrazine-1-carboxylate<sup>[3]</sup> (2.81 g, 9.82 mmol, 1.0 equiv), acetonitrile (98 mL, 0.1 M), 3-chloro-1-(2,3-dihydro-1H-inden-5-yl)propan-1-one<sup>[5]</sup> (2.05 g, 9.82 mmol, 1.0 equiv) and potassium carbonate (1.49 g, 10.8 mmol, 1.1 equiv) yielded **5o** after purification by column chromatography (20-33% EtOAc in petroleum ether) as a colourless gum (3.84 g, 8.37 mmol, 85%). *R*<sub>f</sub> = 0.31 (33% EtOAc in petroleum ether); IR (neat) 3303, 2975, 1724, 1675, 1366, 1237, 1152, 1090, 814, 753 cm<sup>-1</sup>;  $\delta$ H (400 MHz; CDCl<sub>3</sub>) 7.81-7.77 (3H, m, Ar-*H*), 7.73 (1H, d, *J* 8.0, Ar-*H*), 7.31 (2H, d, *J* 8.1, Ar-*H*), 7.28 (1H, d, *J* 8.0, Ar-*H*), 6.38 (1H, br s, NH), 3.86 (2H, br m, NCH<sub>2</sub>), 3.35 (2H, t, *J* 6.7, CH<sub>2</sub>CO), 2.94 (4H, t, *J* 7.4, CH<sub>2</sub>), 2.42 (3H, s, CH<sub>3</sub>), 2.11 (2H, p, *J* 7.4, CH<sub>2</sub>CH<sub>2</sub>CH<sub>2</sub>), 1.27 (9H, s, (CH<sub>3</sub>)<sub>3</sub>);  $\delta$ C (101 MHz; CDCl<sub>3</sub>) 198.0 (C=O, seen on HMBC), 150.8 (Ar-C), 145.0 (Ar-C), 144.5 (Ar-C), 135.1 (Ar-C), 134.0 (Ar-C), 129.8 (Ar-CH), 128.7 (Ar-CH), 126.8 (Ar-CH), 124.6 (Ar-CH), 124.2 (Ar-CH), 81.6 (C, seen on HMBC), 46.6 (NCH<sub>2</sub>), 37.3 (CH<sub>2</sub>CO), 33.2 (CH<sub>2</sub>), 32.7 (CH<sub>2</sub>), 28.0 (Boc-CH<sub>3</sub>), 25.5 (CH<sub>2</sub>CH<sub>2</sub>CH<sub>2</sub>), 21.7 (CH<sub>3</sub>), Boc-C=O not observed; HRMS (ESI<sup>+</sup>) calculated for C<sub>24</sub>H<sub>30</sub>N<sub>2</sub>NaO<sub>5</sub>S [M+Na]<sup>+</sup> 481.1768; found 481.1772.

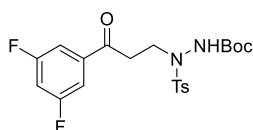

**tert-Butyl 2-(3-(3,5-difluorophenyl)-3-oxopropyl)-2-tosylhydrazine-1-carboxylate (5p).**

Following general procedure 2, *tert*-butyl 2-tosylhydrazine-1-carboxylate<sup>[3]</sup> (350 mg, 1.22 mmol, 1.0 equiv), 3-chloro-1-(3,5-difluorophenyl)propan-1-one (250 mg, 1.22 mol, 1.1 equiv), potassium carbonate (185 mg, 1.34 mmol, 1.1 equiv) and acetonitrile (12 mL, 0.1 M) gave **5p** (409 mg, 0.90 mmol, 74%) as a white solid. *R*<sub>f</sub> = 0.29 (15% EtOAc in petroleum ether); M.p. 158-159 °C; IR (film) 3250, 2923, 1733, 1692, 1240, 1028 cm<sup>-1</sup>;  $\delta$ H (500 MHz; CDCl<sub>3</sub>) 7.81 (2H, d, *J* 8.2, Ar-*H*), 7.46 (2H, d, *J* 5.6, Ar-*H*), 7.35 (2H, d, *J* 7.8, Ar-*H*), 7.05 (1H, t, *J* 8.2, Ar-*H*), 6.39 and 5.96 (minor rotamer) (1H, s, NH), 3.95-3.62 (2H, br m, CH<sub>2</sub>N), 3.34 (2H, t, *J* 6.4, COCH<sub>2</sub>), 2.45 (3H, s, CH<sub>3</sub>), 1.30 (9H, s, C(CH<sub>3</sub>)<sub>3</sub>);  $\delta$ C (125 MHz; CDCl<sub>3</sub>) 164.2 (C=O), 163.1 (dd, *J* 251.4, 11.7, Ar-CF), 144.7 (Ar-C), 139.3 (Ar-C), 129.7 (Ar-CH), 128.6 (Ar-CH), 111.1 (dd, *J* 18.9, 6.3, Ar-CH), 108.7 (t, *J* 25.0, Ar-CH), 81.9 (C), 50.8 (CH<sub>2</sub>), 46.0 (CH<sub>2</sub>), 27.9

(CH<sub>3</sub>), 21.6 (CH<sub>3</sub>), 1 C=O and 1 Ar-C not seen;  $\delta F$  (376 MHz; CDCl<sub>3</sub>) -107.8 (Ar-CF); HRMS (ESI<sup>+</sup>) calculated for C<sub>21</sub>H<sub>24</sub>N<sub>2</sub>NaO<sub>5</sub>SF<sub>2</sub> [M+Na]<sup>+</sup> 477.1266; found 477.1264.

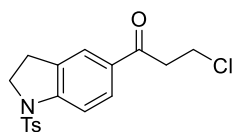

**3-Chloro-1-(1-tosylindolin-5-yl)propan-1-one (12).**

Aluminium trichloride (733 mg, 5.50 mmol, 1.1 equiv) was slowly added to a solution of 1-tosylindoline<sup>[6]</sup> (1.37 g, 5.00 mmol, 1.0 equiv) and 3-chloropropionyl chloride (525  $\mu$ L, 5.50 mmol, 1.1 equiv) in dichloromethane (5.0 mL) at 0 °C. The reaction mixture was allowed to warm to room temperature and stirred for 16 h. Water (10 mL) was carefully added at 0 °C, the layers were separated and the organic layer was washed with sat. NaHCO<sub>3</sub> (10 mL) and brine (10 mL). The resulting organic layer was dried over MgSO<sub>4</sub>, filtered, and concentrated under reduced pressure. The crude product was recrystallised from EtOAc to give **12** as a tan-coloured solid (1.72 g, 4.72 mmol, 94%). M.p. 152-154 °C; IR (neat) 1676, 1602, 1486, 1350, 1247, 1159, 1099, 1038, 969, 819 cm<sup>-1</sup>;  $\delta H$  (400 MHz; CDCl<sub>3</sub>) 7.81 (1H, d, *J* 8.4, Ar-*H*), 7.71 (2H, d, *J* 8.2, Ar-*H*), 7.70 (1H, d, *J* 8.3, Ar-*H*), 7.67 (1H, d, *J* 8.3, Ar-*H*), 7.26 (2H, d, *J* 8.2, Ar-*H*), 3.97 (2H, t, *J* 8.6, NCH<sub>2</sub>), 3.89 (2H, t, *J* 6.8, CH<sub>2</sub>Cl), 3.37 (2H, t, *J* 6.8, CH<sub>2</sub>CO), 3.01 (2H, t, *J* 8.6, NCH<sub>2</sub>CH<sub>2</sub>), 2.38 (3H, s, CH<sub>3</sub>);  $\delta C$  (101 MHz; CDCl<sub>3</sub>) 195.3 (C=O), 146.8 (Ar-C), 144.8 (Ar-C), 133.9 (Ar-C), 132.2 (Ar-C), 132.1 (Ar-C), 130.0 (Ar-CH), 129.3 (Ar-CH), 127.3 (Ar-CH), 125.3 (Ar-CH), 113.6 (Ar-CH), 50.3 (NCH<sub>2</sub>), 41.1 (CH<sub>2</sub>CO), 39.0 (CH<sub>2</sub>Cl), 27.4 (NCH<sub>2</sub>CH<sub>2</sub>), 21.7 (CH<sub>3</sub>); HRMS (ESI<sup>+</sup>) calculated for C<sub>18</sub>H<sub>18</sub>Cl<sup>35</sup>NNaO<sub>3</sub>S [M+Na]<sup>+</sup> 386.0588; found 386.0584.

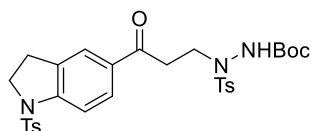

**tert-Butyl**

**2-(3-oxo-3-(1-tosylindolin-5-yl)propyl)-2-**

**tosylhydrazine-1-carboxylate (5q).**

Following general method 2, *tert*-butyl 2-tosylhydrazine-1-carboxylate<sup>[3]</sup> (897 mg, 3.13 mmol, 1.0 equiv), acetonitrile (32 mL, 0.1 M), 3-chloro-1-(1-tosylindolin-5-yl)propan-1-one (**12**) (1.14 g, 3.13 mmol, 1.0 equiv) and potassium carbonate (476 mg, 3.44 mmol, 1.1 equiv) yielded **5q** after purification by column chromatography (33-50% EtOAc in petroleum ether) as a white foam (1.42 g, 2.31 mmol, 75%). M.p. 87-89 °C; *R*<sub>f</sub> = 0.32 (50% EtOAc in petroleum ether); IR (neat) 3294, 2974, 1674, 1602, 1353, 1244, 1159, 1090, 1051, 973, 813 cm<sup>-1</sup>;  $\delta H$  (400 MHz; CDCl<sub>3</sub>) 7.80 (1H, d, *J* 8.6, Ar-*H*), 7.78 (2H, d, *J* 8.3, Ar-*H*), 7.71 (2H, d, *J* 8.3, Ar-*H*), 7.68 (1H, s, Ar-*H*), 7.66 (1H, d, *J* 8.6, Ar-*H*), 7.31 (2H, d, *J* 7.9, Ar-*H*), 7.27 (2H, d, *J* 7.9, Ar-*H*), 6.33 (1H, br s, NH), 3.97 (2H, t, *J* 8.6, NCH<sub>2</sub>CH<sub>2</sub>C), 3.84 (2H, br m, NCH<sub>2</sub>CH<sub>2</sub>CO), 3.29 (2H, t, *J* 6.7, NCH<sub>2</sub>CH<sub>2</sub>CO), 3.00 (t, *J* 8.6, 2H NCH<sub>2</sub>CH<sub>2</sub>C), 2.42 (3H, s, CH<sub>3</sub>), 2.38 (3H, s, CH<sub>3</sub>), 1.25 (9H, s, (CH<sub>3</sub>)<sub>3</sub>);  $\delta C$  (101 MHz; CDCl<sub>3</sub>) 196.6 (C=O, seen on HMBC), 146.7 (Ar-C), 144.8 (Ar-C), 144.6 (Ar-C), 133.9 (Ar-C), 132.2 (Ar-C), 132.1 (Ar-C), 130.0 (Ar-CH), 129.8 (Ar-CH), 129.3 (Ar-CH), 128.7 (Ar-CH), 127.4 (Ar-CH), 125.4 (Ar-CH), 113.6 (Ar-CH), 81.6 (C, seen on HMBC), 50.4 (NCH<sub>2</sub>CH<sub>2</sub>C), 46.6 (NCH<sub>2</sub>CH<sub>2</sub>CO), 36.8 (NCH<sub>2</sub>CH<sub>2</sub>CO), 28.0 (Boc-CH<sub>3</sub>),

27.4 (NCH<sub>2</sub>CH<sub>2</sub>C), 21.74 (CH<sub>3</sub>), 21.70 (CH<sub>3</sub>), one Ar-C and Boc-C=O not observed; HRMS (ESI<sup>+</sup>) calculated for C<sub>30</sub>H<sub>35</sub>N<sub>3</sub>NaO<sub>7</sub>S<sub>2</sub> [M+Na]<sup>+</sup> 636.1809; found 636.1809.

### Other Aryl Ketone Syntheses

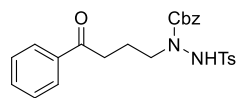

#### **Benzyl 1-(4-oxo-4-phenylbutyl)-2-tosylhydrazine-1-carboxylate (5r).**

Hydrazine **4a**<sup>[1]</sup> (400 mg, 0.96 mmol, 1.0 equiv), 4-hydroxy-1-phenylbutan-1-one<sup>[10]</sup> 158 mg, 0.96 mmol, 1.0 equiv), triphenylphosphine (376 mg, 1.44 mmol, 1.5 equiv), diethyl azodicarboxylate (224  $\mu$ L, 1.44 mmol, 1.5 equiv) and tetrahydrofuran (10 mL, 0.1 M) were combined and stirred at room temperature for 24 h. The reaction mixture was then concentrated *in vacuo*. The crude product was purified by column chromatography (30% EtOAc/ pet ether) to give the tetrasubstituted hydrazine. To this hydrazine was added trifluoroacetic acid (735  $\mu$ L, 9.60 mmol, 10.0 equiv) and dichloromethane (9.6 mL, 0.1 M), the solution was then stirred for 2 h. The resulting yellow solution was concentrated *in vacuo* to give a yellow oil, which was purified by column chromatography (25% EtOAc/pet ether) to yield **5r** as a white solid (215 mg, 0.46 mmol, 48%).  $R_f$  = 0.26 (25% EtOAc in petroleum ether); M.p. 136-137 °C; IR (film) 3179, 3060, 2955, 1709, 1687, 1369, 1270 cm<sup>-1</sup>;  $\delta H$  (500 MHz; CDCl<sub>3</sub>) 7.91 (2H, d,  $J$  7.6 Ar-CH), 7.72 (2H, d,  $J$  7.8, Ar-CH), 7.58 (1H, t,  $J$  7.3, Ar-CH), 7.46 (2H, t,  $J$  7.7, Ar-CH), 7.31 (3H, t,  $J$  6.9, Ar-CH), 7.19 (2H, d,  $J$  7.5, Ar-CH), 7.10-7.00 (3H, m, Ar-CH and NH), 4.78 (2H, br s, COOCH<sub>2</sub>), 3.79 (2H, br s, CH<sub>2</sub>NCbz), 3.01 (2H, br s, COCH<sub>2</sub>), 2.41 (3H, s, Ar-CH<sub>3</sub>), 2.15-2.08 (2H, m, COCH<sub>2</sub>CH<sub>2</sub>);  $\delta C$  (125 MHz, CDCl<sub>3</sub>) 199.2 (C=O, seen on HMBC), 144.4 (Ar-C), 136.7 (Ar-C), 135.2 (Ar-C), 133.2 (Ar-CH), 129.5 (Ar-CH), 128.6 (Ar-CH), 128.5 (Ar-CH), 128.4 (Ar-CH), 128.0 (Ar-CH), 128.0 (Ar-CH), 127.7 (Ar-C), 68.3 (CH<sub>2</sub>), 50.6 (CH<sub>2</sub>), 35.6 (CH<sub>2</sub>), 22.7 (CH<sub>2</sub>), 21.7 (Ar-CH<sub>3</sub>), 1 C=O and 1 Ar-CH not seen; HRMS (ESI<sup>+</sup>) calculated for C<sub>25</sub>H<sub>26</sub>N<sub>2</sub>O<sub>5</sub>S [M+Na]<sup>+</sup> 489.1455; found 489.1455.

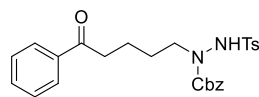

#### **Benzyl 1-(5-oxo-5-phenylpentyl)-2-tosylhydrazine-1-carboxylate (5s).**

Hydrazine **4a**<sup>[1]</sup> (200 mg, 0.48 mmol, 1.0 equiv), 5-hydroxy-1-phenylpentan-1-one<sup>[10]</sup> (84 mg, 0.48 mmol, 1.0 equiv), triphenylphosphine (188 mg, 0.72 mmol, 1.5 equiv), diethyl azodicarboxylate (112  $\mu$ L, 0.72 mmol, 1.5 equiv) and tetrahydrofuran (4.8 mL, 0.1 M) were combined and stirred at room temperature for 24 h. The reaction mixture was then concentrated *in vacuo*. The crude product was purified by column chromatography (30% EtOAc/ pet ether) to give the tetrasubstituted hydrazine. To this hydrazine was added trifluoroacetic acid (368  $\mu$ L, 4.8 mmol, 10.0 equiv) and dichloromethane (4.8 mL, 0.1 M), the solution was then stirred for 2 h. The resulting yellow solution was concentrated *in vacuo* to give a yellow oil, which was purified by column chromatography (25% EtOAc/pet ether) to yield **5s** as a white solid (140



mg, 0.29 mmol, 61%).  $R_f = 0.28$  (25% EtOAc in petroleum ether); M.p. 86-88 °C; IR (film) 3214, 2957, 1699, 1671, 1364, 1181  $\text{cm}^{-1}$ ;  $\delta H$  (500 MHz;  $\text{CDCl}_3$ ) 7.96 (2H, d,  $J$  7.6, Ar-H), 7.74 (2H, d,  $J$  8.0, Ar-H), 7.59 (1H, t,  $J$  7.3, Ar-H), 7.49 (2H, t,  $J$  7.7, Ar-H), 7.38-7.30 (3H, m, Ar-H), 7.22 (2H, d,  $J$  8.0, Ar-H), 7.15 (2H, s, Ar-H), 6.99 (1H, s, NH), 4.90 (2H, br s,  $\text{COOCH}_2$ ), 3.72 (2H, br s,  $\text{CH}_2\text{NCbz}$ ), 2.99 (2H, br s,  $\text{COCH}_2$ ), 2.42 (3H, s,  $\text{CH}_3$ ), 1.79-1.67 (4H, m,  $\text{COCH}_2\text{CH}_2\text{CH}_2$ );  $\delta C$  (125 MHz,  $\text{CDCl}_3$ ) 199.8 (C=O), 144.5 (Ar-C), 136.9 (Ar-C), 135.2 (Ar-C), 133.1 (Ar-CH), 129.5 (Ar-CH), 128.6 (Ar-CH), 128.5 (Ar-CH), 128.5 (Ar-CH), 128.1 (Ar-CH), 128.0 (Ar-CH), 68.4 ( $\text{CH}_2$ ), 50.7 ( $\text{CH}_2$ ), 37.9 ( $\text{CH}_2$ ), 26.5 ( $\text{CH}_2$ ), 21.7 (Ar- $\text{CH}_3$ ), 20.9 ( $\text{CH}_2$ ), 1 C=O, 1 Ar-C and 1 Ar-CH not seen; HRMS (ESI<sup>+</sup>) calculated for  $\text{C}_{26}\text{H}_{28}\text{N}_2\text{O}_5\text{S}$   $[\text{M}+\text{Na}]^+$  503.1611; found 503.1615.

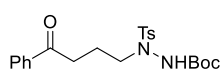

***tert*-Butyl 2-(4-oxo-4-phenylbutyl)-2-tosylhydrazine-1-carboxylate (5t).**

To a solution of *tert*-butyl 2-tosylhydrazine-1-carboxylate<sup>[3]</sup> (4.20 g, 14.7 mmol, 1.0 equiv) in dimethylformamide (146 mL) was added 4-iodo-1-phenylbutan-1-one<sup>[8]</sup> (6.04 g, 22.0 mmol, 1.5 equiv) followed by potassium carbonate (3.34 g, 24.2 mmol, 1.6 equiv). The reaction mixture was stirred at rt for 20 h. The mixture was concentrated under reduced pressure, ethyl acetate (100 mL) was added, and mixture was washed with water (5 × 80 mL), brine (80 mL), dried over magnesium sulphate, filtered and concentrated *in vacuo*. The crude product was purified by column chromatography (20-33% EtOAc/petroleum ether) to give **5t** as a white solid (4.92 g, 11.4 mmol, 78%).  $R_f = 0.32$  (33% EtOAc in petroleum ether); M.p. 133-135 °C; IR (neat) 3277, 2977, 2910, 1717, 1677, 1342, 1161, 994, 665  $\text{cm}^{-1}$ ;  $\delta H$  (400 MHz;  $\text{CDCl}_3$ ) 7.96 (2H, d,  $J$  7.2, Ar-H), 7.74 (2H, d,  $J$  7.5, Ar-H), 7.56 (1H, t,  $J$  7.3, Ar-H), 7.45 (2H, t,  $J$  7.6, Ar-H), 7.30-7.25 (2H, m, Ar-H), 6.37 (0.70H, br s, NH major), 5.84 (0.30H, br s, NH minor), 3.52 (2H, br s,  $\text{NCH}_2$ ), 3.17 (2H, t,  $J$  6.8,  $\text{CH}_2\text{CO}$ ), 2.39 (3H, s,  $\text{CH}_3$ ), 2.00 (2H, p,  $J$  6.5,  $\text{CH}_2\text{CH}_2\text{N}$ ), 1.33 (9H, s, ( $\text{CH}_3$ )<sub>3</sub>);  $\delta C$  (125 MHz;  $\text{CDCl}_3$ ) 199.9 (C=O), 153.6 (Boc-C=O), 144.4 (Ar-C), 137.0 (Ar-C), 134.2 (Ar-C), 133.2 (Ar-CH), 129.7 (Ar-CH), 128.7 (Ar-CH), 128.6 (Ar-CH), 128.2 (Ar-CH), 81.7 (C), 49.5 ( $\text{NCH}_2$ ), 35.5 ( $\text{CH}_2\text{CO}$ ), 28.1 (Boc- $\text{CH}_3$ ), 21.7 ( $\text{CH}_3$ ), 21.2 ( $\text{CH}_2\text{CH}_2\text{N}$ ); HRMS (ESI<sup>+</sup>) calculated for  $\text{C}_{22}\text{H}_{28}\text{N}_2\text{NaO}_5\text{S}$   $[\text{M}+\text{Na}]^+$  455.1611; found 455.1612.

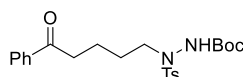

***tert*-Butyl 2-(5-oxo-5-phenylpentyl)-2-tosylhydrazine-1-carboxylate (5u).**

To a solution of *tert*-butyl 2-tosylhydrazine-1-carboxylate<sup>[3]</sup> (2.58 g, 9.00 mmol, 1.0 equiv) in anhydrous dimethylformamide (90 mL) was added 5-iodo-1-phenylpentan-1-one<sup>[10]</sup> (3.92 g, 13.5 mmol, 1.5 equiv) followed by potassium carbonate (1.99 g, 14.4 mmol, 1.6 equiv). The reaction mixture was stirred at rt for 28 h. The mixture was concentrated under reduced pressure, ethyl acetate (60 mL) was added, and mixture was washed with water (5 × 50 mL), brine (50 mL), dried over magnesium sulphate, filtered and

concentrated *in vacuo*. The crude product was purified by column chromatography (20-33% EtOAc/petroleum ether) to give **5u** as a colourless oil, which crystallised upon standing to a white solid (2.63 g, 5.90 mmol, 65%).  $R_f = 0.31$  (33% EtOAc in petroleum ether); M.p. 89-91 °C; IR (neat) 3226, 3141, 2958, 1697, 1680, 1315, 1117, 1041, 976, 772, 693  $\text{cm}^{-1}$ ;  $\delta H$  (500 MHz;  $\text{CDCl}_3$ ) 7.96 (2H, d,  $J$  7.6, Ar-*H*), 7.77 (2H, d,  $J$  8.2, Ar-*H*), 7.56 (1H, t,  $J$  7.4, Ar-*H*), 7.46 (2H, t,  $J$  7.6, Ar-*H*), 7.36–7.28 (2H, m, Ar-*H*), 6.40 (0.68H, br s, NH major), 5.84 (0.32H, br s, NH minor), 3.48 (2H, br s,  $\text{NCH}_2$ ), 3.01 (2H, t,  $J$  7.1,  $\text{CH}_2\text{CO}$ ), 2.41 (3H, s,  $\text{CH}_3$ ), 1.88–1.79 (2H, m,  $\text{CH}_2\text{CH}_2\text{CO}$ ), 1.68 (2H, p,  $J$  7.6,  $\text{CH}_2\text{CH}_2\text{N}$ ), 1.31 (9H, br s,  $(\text{CH}_3)_3$ );  $\delta C$  (125 MHz;  $\text{CDCl}_3$ ) 200.1 (C=O), 153.4 (Boc-C=O), 144.4 (Ar-C), 137.0 (Ar-C), 134.4 (Ar-C), 133.2 (Ar-CH), 129.7 (Ar-CH), 128.7 (Ar-CH), 128.2 (Ar-CH), 81.6 (C), 49.5 ( $\text{NCH}_2$ ), 37.8 ( $\text{CH}_2\text{CO}$ ), 28.1 (Boc- $\text{CH}_3$ ), 26.7 ( $\text{CH}_2\text{CH}_2\text{N}$ ), 21.7 ( $\text{CH}_3$ ), 21.1 ( $\text{CH}_2\text{CH}_2\text{CO}$ ), 1 Ar-CH not seen; HRMS (ESI<sup>+</sup>) calculated for  $\text{C}_{23}\text{H}_{30}\text{N}_2\text{NaO}_5\text{S}$   $[\text{M}+\text{Na}]^+$  469.1768; found 469.1765.

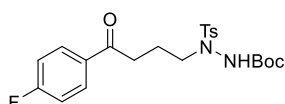

**tert-Butyl 2-(4-(4-fluorocyclohexa-2,4-dien-1-yl)-4-oxobutyl)-2-tosylhydrazine-1-carboxylate (5v).**

To a solution of *tert*-butyl 2-tosylhydrazine-1-carboxylate<sup>[3]</sup> (4.24 g, 14.8 mmol, 1.0 equiv) in dimethylformamide (150 mL) was added 1-(4-fluorophenyl)-4-iodobutan-1-one<sup>[11]</sup> (6.48 g, 22.2 mmol, 1.5 equiv) followed by potassium carbonate (3.27 g, 23.7 mmol, 1.6 equiv). The reaction mixture was stirred at rt for 26 h. The mixture was concentrated under reduced pressure, ethyl acetate (100 mL) was added, and mixture was washed with water (5 × 80 mL), brine (80 mL), dried over magnesium sulphate, filtered and concentrated *in vacuo*. The crude product was purified by column chromatography (20-33% EtOAc/petroleum ether) to give **5v** as a white solid (5.25 g, 11.7 mmol, 79%). M.p. 135-137 °C;  $R_f = 0.34$  (33% EtOAc in petroleum ether); IR (neat) 3254, 2980, 1738, 1670, 1596, 1508, 1366, 1242, 1159, 1048, 814, 742, 655  $\text{cm}^{-1}$ ;  $\delta H$  (300 MHz;  $\text{CDCl}_3$ ) 8.00 (2H, dd,  $J$  8.1, 5.8, Ar-*H*), 7.74 (2H, d,  $J$  8.0 Hz, Ar-*H*), 7.33-7.26 (2H, m, Ar-*H*), 7.12 (2H, t,  $J$  8.4, Ar-*H*), 6.33 (0.74H, br s, NH major), 5.83 (0.26H, br s, NH minor), 3.50 (2H, br s,  $\text{NCH}_2$ ), 3.16 (2H, t,  $J$  6.9,  $\text{CH}_2\text{CO}$ ), 2.40 (3H, s,  $\text{CH}_3$ ), 2.00 (2H, p,  $J$  6.5,  $\text{CH}_2\text{CH}_2\text{N}$ ), 1.33 (9H, s,  $(\text{CH}_3)_3$ );  $\delta C$  (125 MHz;  $\text{CDCl}_3$ )  $\delta$  198.5 (C=O), 165.9 (d,  $J$  254.5, CF), 153.6 (Boc-C=O), 144.5 (Ar-C), 134.2 (Ar-C), 133.5 (d,  $J$  2.9, Ar-C), 130.9 (d,  $J$  7.4, Ar-CH), 129.7 (Ar-CH), 128.6 (Ar-CH), 115.8 (d,  $J$  21.7, Ar-CH), 81.8 (C), 49.6 ( $\text{NCH}_2$ ), 35.4 ( $\text{CH}_2\text{CO}$ ), 28.1 (Boc- $\text{CH}_3$ ), 21.7 ( $\text{CH}_3$ ), 21.2 ( $\text{CH}_2\text{CH}_2\text{N}$ );  $\delta F$  (376 MHz;  $\text{CDCl}_3$ ) -105.5 (CF); HRMS (ESI<sup>+</sup>) calculated for  $\text{C}_{22}\text{H}_{27}\text{FN}_2\text{NaO}_5\text{S}$   $[\text{M}+\text{Na}]^+$  473.1517; found 473.1522.

### Asymmetric Transfer Hydrogenation: Optimization

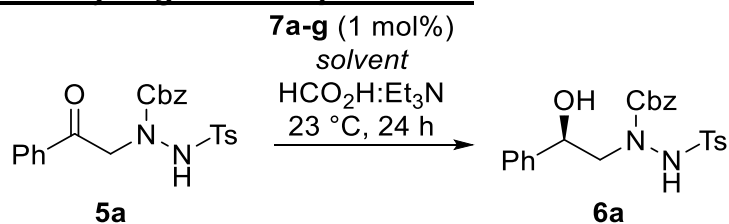

The catalyst (1 mol%) was stirred in formic acid : triethylamine (5 : 2) azeotrope (0.11 mL) for 10 min. Aryl ketone **5a** (50 mg, 0.11 mmol, 1.0 equiv) and solvent (so that [S] = 0.2-0.5 M) were added and the solution was stirred for 24-48 h at 23 °C. The solution was then concentrated *in vacuo* and the crude product was purified by column chromatography (30% ethyl acetate in petroleum ether). Enantiomeric excess (98% *ee*) was determined by HPLC analysis (25 °C). [Chiralpak ADH column 2-propanol/hexane = 15/85; flow rate = 1.0 mL/min; detection wavelength = 254 nm]  $t_R$  26.8 min;  $t_R$  28.8 min.

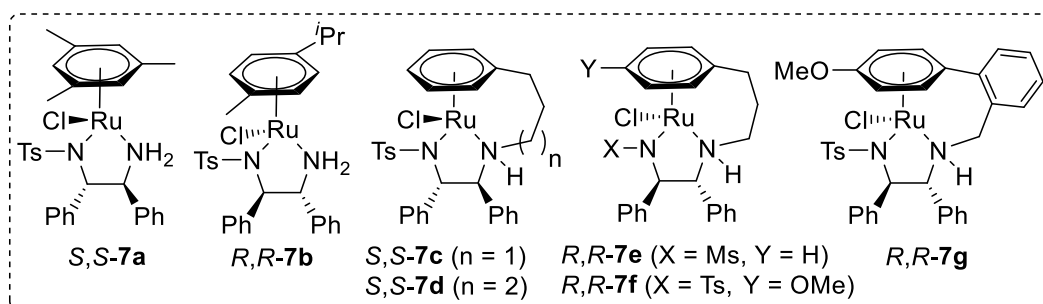

| Entry | Catalyst               | Solvent                         | Yield [%] <sup>[a]</sup> | Ee [%] <sup>[b]</sup>          |
|-------|------------------------|---------------------------------|--------------------------|--------------------------------|
| 1     | <i>S,S</i> - <b>7a</b> | CH <sub>2</sub> Cl <sub>2</sub> | 86                       | 97 ( <i>R</i> )                |
| 2     | <i>R,R</i> - <b>7b</b> | CH <sub>2</sub> Cl <sub>2</sub> | 16 <sup>[c]</sup>        | 91 ( <i>S</i> ) <sup>[d]</sup> |
| 3     | <i>S,S</i> - <b>7c</b> | CH <sub>2</sub> Cl <sub>2</sub> | 97                       | 99 ( <i>R</i> )                |
| 4     | <i>S,S</i> - <b>7d</b> | CH <sub>2</sub> Cl <sub>2</sub> | 7                        | 97 ( <i>R</i> )                |
| 5     | <i>R,R</i> - <b>7e</b> | CH <sub>2</sub> Cl <sub>2</sub> | 97                       | 97 ( <i>S</i> ) <sup>[d]</sup> |
| 6     | <i>R,R</i> - <b>7f</b> | CH <sub>2</sub> Cl <sub>2</sub> | 80                       | 99 ( <i>S</i> ) <sup>[d]</sup> |
| 7     | <i>R,R</i> - <b>7g</b> | CH <sub>2</sub> Cl <sub>2</sub> | 16                       | 98 ( <i>S</i> ) <sup>[d]</sup> |
| 8     | <i>S,S</i> - <b>7c</b> | CHCl <sub>3</sub>               | 96                       | 99 ( <i>R</i> )                |
| 9     | <i>S,S</i> - <b>7c</b> | EtOAc                           | 88                       | 99 ( <i>R</i> )                |
| 10    | <i>S,S</i> - <b>7c</b> | MeCN <sup>[e]</sup>             | 66                       | 98 ( <i>R</i> )                |
| 11    | <i>S,S</i> - <b>7c</b> | MeOH <sup>[f]</sup>             | 92                       | 99 ( <i>R</i> )                |

[a] Isolated yield after column chromatography. [b] Determined by HPLC analysis using chiralpak ADH. [c] reaction run for 48 h. [d] Opposite *S*-enantiomer produced. [e] reaction run at 0.3 M. [f] reaction run at 0.2 M.

### General method 3: Asymmetric Transfer Hydrogenation (ATH)

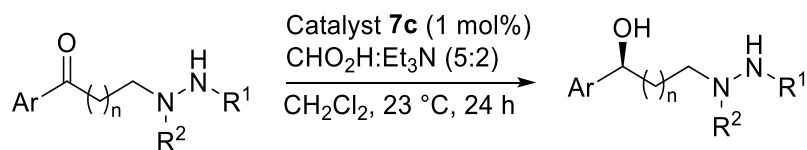

A solution of catalyst (0.5 - 1 mol%) in formic acid : triethylamine (5 : 2) azeotrope (so that [S] = 1.0 M) was stirred for 15 min. The ketone substrate (1.0 equiv) and Dichloromethane (so that [S] = 0.25 – 0.5 M) were added and stirred at 23 °C. After 24 h, the reaction mixture was concentrated *in vacuo*. The crude product was purified by column chromatography (35-40% EtOAc/ pet ether) to give the following alcohols.

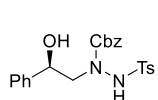

#### Benzyl (R)-1-(2-hydroxy-2-phenylethyl)-2-tosylhydrazine-1-carboxylate

**(6a).** Following general method 3, aryl ketone **5a** (100 mg, 0.23 mmol, 1.0 equiv), catalyst **7c** (1.4 mg, 2.3 μmol, 0.01 equiv), 5 : 2 formic acid : triethylamine complex (0.23 mL, 1.0 M) in dichloromethane (0.46 mL, 0.5 M) yielded **6a** as a white solid (97 mg, 0.22 mmol, 97%). M.p. 100-101 °C; *R<sub>f</sub>* = 0.29 (40% EtOAc in petroleum ether); [α]<sub>D</sub><sup>31</sup> –50.5 (c 0.30, CHCl<sub>3</sub>). Enantiomeric excess (98% ee) was determined by HPLC analysis (25 °C). [Chiralpak ADH column 2-propanol/hexane = 15/85; flow rate = 1.0 mL/min; detection wavelength = 254 nm] *t<sub>R</sub>* 26.8 min; *t<sub>R</sub>* 28.8 min. IR (film) 3228, 2925, 1716, 1340, 1185 cm<sup>-1</sup>; δ*H* (400 MHz; CDCl<sub>3</sub>) 7.73-7.71 (2H, m, Ar-*H*), 7.32-7.13 (12H, m, Ar-*H*), 5.13-4.85 (3H, m, CHOH and OCH<sub>2</sub>Ph), 3.88-3.73 (2H, m, NCH<sub>2</sub>), 2.79 (1H, br s, OH), 2.39 (3H, s, CH<sub>3</sub>); δ*C* (125 MHz; CDCl<sub>3</sub>) 144.6 (Ar-C), 141.1 (Ar-C), 129.6 (Ar-CH), 128.7 (Ar-CH), 128.6 (Ar-CH), 128.5 (Ar-CH), 128.2 (Ar-CH), 128.1 (Ar-CH), 126.0 (Ar-CH), 71.0 (CH, seen on HSQC), 68.8 (CH<sub>2</sub>), 58.4 (NCH<sub>2</sub>), 21.8 (CH<sub>3</sub>), C=O, 2 Ar-C and 1 Ar-CH not seen; HRMS (ESI<sup>+</sup>) calculated for C<sub>23</sub>H<sub>24</sub>N<sub>2</sub>NaO<sub>5</sub>S [M+Na]<sup>+</sup> 463.1298; found 463.1302.

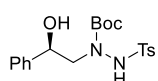

#### tert-Butyl (R)-1-(2-hydroxy-2-phenylethyl)-2-tosylhydrazine-1-carboxylate

**(6b).** Following general method 4, aryl ketone **5b** (100 mg, 0.25 mmol, 1.0 equiv), (S,S)-catalyst **7c** (1.6 mg, 2.5 μmol, 0.01 equiv), 5:2 FA:TEA complex (0.25 mL, 1 M) and CH<sub>2</sub>Cl<sub>2</sub> (0.50 mL, 0.5 M) yielded **6b** as a white solid (100 mg, 0.25 mmol, 99%). *R<sub>f</sub>* = 0.21 (25% EtOAc in petroleum ether); M.p. 138-139 °C; [α]<sub>D</sub><sup>28</sup> = –4.8 (c 0.12, CHCl<sub>3</sub>); Enantiomeric excess (99% ee) was determined by HPLC analysis (25 °C). [Chiralpak IA column 2-propanol/hexane = 1.5/98.5; flow rate = 1.0 mL/min; detection wavelength = 254 nm] *t<sub>R</sub>* 37.7 min; *t<sub>R</sub>* 42.4 min; IR (film) 3456, 3128, 2975, 1709, 1089; δ*H* (500 MHz, CHCl<sub>3</sub>) 7.82 (2H, d, *J* 8.2, Ar-*H*), 7.36 (7H, m, Ar-*H*), 5.17 (1H, dd, *J* 9.9, 3.6, CHPh), 3.86 (1H, br m, NCHH), 3.74 (1H, d, *J* 9.9, NCHH), 2.44 (3H, s, CH<sub>3</sub>), 1.18 (9H, br s, C(CH<sub>3</sub>)<sub>3</sub>); δ*C* (125 MHz, CDCl<sub>3</sub>) 144.6 (C=O), 141.4 (Ar-C), 132.2 (Ar-C), 132.1 (Ar-C), 130.0 (Ar-CH), 129.8 (Ar-CH),

128.6 (Ar-CH), 128.0 (Ar-CH), 126.0 (Ar-CH), 82.9 (C), 75.2 (CH), 58.8 (CH<sub>2</sub>) 27.8 (CH<sub>3</sub>), 21.6 (CH<sub>3</sub>); HRMS (ES<sup>+</sup>) calculated for C<sub>20</sub>H<sub>26</sub>N<sub>2</sub>O<sub>5</sub>S (M+Na)<sup>+</sup> 429.1451; found 429.1455.

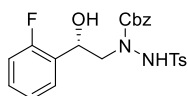

**Benzyl (S)-1-(2-(2-fluorophenyl)-2-hydroxyethyl)-2-tosylhydrazine-1-carboxylate (6c).**

Following general method 3, aryl ketone **5c** (100 mg, 0.22 mmol, 1.0 equiv), catalyst **7f** (1.5 mg, 2.2 μmol, 0.01 equiv), 5 : 2 formic acid : triethylamine complex (0.22 mL, 1.0 M) and dichloromethane (0.44 mL, 0.5 M) yielded **6c** as a colourless oil (97 mg, 0.21 mmol, 97%). *R<sub>f</sub>* = 0.21 (35% EtOAc in petroleum ether); [α]<sup>32</sup><sub>D</sub> +4.0 (c 0.22, CHCl<sub>3</sub>). Enantiomeric excess (90% ee) was determined by HPLC analysis (25 °C). [Chiralpak IA column 2-propanol/hexane = 5/95; flow rate = 1.0 mL/min; detection wavelength = 254 nm] *t<sub>R</sub>* 56.4 min; *t<sub>R</sub>* 61.4 min. IR (film) 3503, 3237, 2926, 1713, 1305, 1128 cm<sup>-1</sup>; δ*H* (500 MHz; CDCl<sub>3</sub>) 7.73 (2H, d, *J* 7.9, Ar-CH), 7.47 (1H, t, *J* 7.3, Ar-H), 7.42 (1H, d, *J* 7.7, Ar-H), 7.38-7.26 (3H, m, Ar-H), 7.20 (2H, d, *J* 8.0, Ar-H), 7.18-7.11 (3H, m, Ar-H), 7.00 (1H, t, *J* 10.0, Ar-H), 5.44-5.34 (1H, m, CHOH), 4.86 (2H, br s, CH<sub>2</sub>Ph), 3.99-3.89 and 2.95-2.75 (minor rotamer) (2H, m, NCH<sub>2</sub>) 2.40 (3H, s, CH<sub>3</sub>); δ*C* (125 MHz; CDCl<sub>3</sub>) 159.9 (d, *J* 245.0, Ar-CF), 144.6 (Ar-C), 135.0 (Ar-C), 129.6 (Ar-CH), 129.6 (Ar-CH), 128.0 (d, *J* 12.5, Ar-C), 127.7 (d, *J* 3.8, Ar-CH), 124.5 (d, *J* 3.8, Ar-CH), 115.4 (d, *J* 21.3, Ar-CH), 68.7 (CH<sub>2</sub>), 66.3 (CH, seen on HSQC), 57.0 (CH<sub>2</sub>), 21.7 (CH<sub>3</sub>), 1 Ar-C, 4 Ar-CH, C=O not seen; δ*F* (376 MHz, CDCl<sub>3</sub>) -118.6 (CF); HRMS (ESI<sup>+</sup>) calculated for C<sub>23</sub>H<sub>23</sub>FN<sub>2</sub>O<sub>5</sub>S [M+Na]<sup>+</sup> 481.1204; found 481.1209.

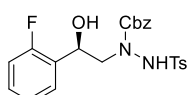

**Benzyl (R)-1-(2-(2-fluorophenyl)-2-hydroxyethyl)-2-tosylhydrazine-1-carboxylate (6c).**

Following general method 3, aryl ketone **5c** (100 mg, 0.22 mmol, 1.0 equiv), catalyst **7c** (1.5 mg, 2.2 μmol, 0.01 equiv), 5 : 2 formic acid : triethylamine complex (0.22 mL, 1.0 M) and dichloromethane (0.44 mL, 0.5 M) yielded **6c** as a colourless oil (97 mg, 0.21 mmol, 97%). [α]<sup>32</sup><sub>D</sub> -3.17 (c 0.30, CHCl<sub>3</sub>). Enantiomeric excess (77% ee) was determined by HPLC analysis (25 °C). [Chiralpak IA column 2-propanol/hexane = 5/95; flow rate = 1.0 mL/min; detection wavelength = 254 nm] *t<sub>R</sub>* 56.4 min; *t<sub>R</sub>* 61.4 min.

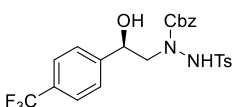

**Benzyl (R)-1-(2-hydroxy-2-(4-(trifluoromethyl)phenyl)ethyl)-2-tosylhydrazine-1-carboxylate (6d).**

Following general method 3, aryl ketone **5d** (100 mg, 0.20 mmol, 1.0 equiv), catalyst **7c** (1.24 mg, 2.0 μmol, 0.01 equiv), 5 : 2 formic acid : triethylamine complex (0.2 mL, 1.0 M) and dichloromethane (0.4 mL, 0.5 M) yielded **6d** as a white solid (97 mg, 0.19 mmol, 96%). *R<sub>f</sub>* = 0.19 (35% EtOAc in petroleum ether); M.p. 147-148 °C; [α]<sup>32</sup><sub>D</sub> -18.1 (c 0.06, CHCl<sub>3</sub>). Enantiomeric excess (95% ee) was determined by HPLC analysis (25 °C). [Chiralpak OD-H

column 2-propanol/hexane = 8/92; flow rate = 1.0 mL/min; detection wavelength = 254 nm]  $t_R$  20.6 min;  $t_R$  25.4 min; IR (film) 3439, 3144, 2923, 1716, 1401, 1324, 1087  $\text{cm}^{-1}$ ;  $\delta H$  (600 MHz;  $\text{d}_6$ -DMSO at 100  $^\circ\text{C}$ ) 9.66 (1H, s, NH), 7.68 (2H, d,  $J$  8.2, Ar-H), 7.61 (2H, d,  $J$  8.1, Ar-H), 7.50 (2H, d,  $J$  8.0, Ar-H), 7.39-7.25 (5H, m, Ar-H), 7.15 (2H, d,  $J$  7.5, Ar-H), 5.31 (1H, s, OH), 4.96-4.92 (1H, t,  $J$  8.2, CHOH), 4.75-4.63 (2H, m,  $\text{CH}_2\text{Ph}$ ), 3.75-3.58 (2H, m,  $\text{NCH}_2$ ), 2.38 (3H, s,  $\text{CH}_3$ );  $\delta C$  (150 MHz;  $\text{D}_6$ -DMSO at 100  $^\circ\text{C}$ ) 155.7 (C=O), 148.1 (Ar-C), 143.9 (Ar-C), 137.3 (Ar-C), 136.3 (Ar-C), 129.8 (Ar-CH), 128.6 (q,  $J$  26.3, Ar-C), 128.5 (Ar-CH), 128.2 (Ar-CH), 127.9 (Ar-CH), 127.9 (Ar-CH), 127.3 (Ar-CH), 125.3 (q,  $J$  3.8, Ar-CH), 124.8 (q,  $J$  225.0,  $\text{CF}_3$ ), 69.5 (CH), 67.7 ( $\text{CH}_2$ ), 58.0 ( $\text{CH}_2$ ), 21.4 ( $\text{CH}_3$ );  $\delta F$  (286 MHz,  $\text{D}_6$ -DMSO) -61.8 ( $\text{CF}_3$ ); HRMS (ESI $^+$ ) calculated for  $\text{C}_{24}\text{H}_{23}\text{F}_3\text{N}_2\text{O}_5\text{S}$  [ $\text{M}+\text{Na}$ ] $^+$  531.1172; found 531.1173.

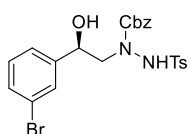

**Benzyl (R)-1-(2-(3-bromophenyl)-2-hydroxyethyl)-2-tosylhydrazine-1-carboxylate (6e).**

Following general method 3, aryl ketone **5e** (80 mg, 0.15 mmol, 1.0 equiv), catalyst **7c** (1.0 mg, 1.5  $\mu\text{mol}$ , 0.01 equiv), 5 : 2 formic acid : triethylamine complex (0.15 mL, 1.0 M) and dichloromethane (0.3 mL, 0.5 M) yielded **6e** as a white solid (80 mg, 0.15 mmol, 99%).  $R_f$  = 0.20 (35% EtOAc in petroleum ether); M.p. 135-136  $^\circ\text{C}$ ;  $[\alpha]^{32}_D$  -16.0 (c 0.50,  $\text{CHCl}_3$ ); Enantiomeric excess (97% ee) was determined by HPLC analysis (25  $^\circ\text{C}$ ). [Chiralpak OD-H column 2-propanol/hexane = 9/91; flow rate = 1.0 mL/min; detection wavelength = 254 nm]  $t_R$  19.6 min;  $t_R$  25.1 min; IR (film) 3456, 3222, 2929, 1715, 1323, 1211, 1185  $\text{cm}^{-1}$ ;  $\delta H$  (500 MHz;  $\text{CDCl}_3$ ) 7.73 (2H, d,  $J$  8.0, Ar-CH), 7.50 (1H, s, Ar-H), 7.42 (1H, d,  $J$  7.7, Ar-H), 7.36-7.32 (3H, m, Ar-H), 7.27-7.05 (6H, m, Ar-H) 5.11 (1H, d,  $J$  9.5, CHOH), 4.87 (2H, br s,  $\text{CH}_2\text{Ph}$ ), 3.90-3.65 (2H, m,  $\text{NCH}_2$ ) 2.41 (3H, s,  $\text{CH}_3$ );  $\delta C$  (125 MHz;  $\text{CDCl}_3$ ) 144.8 (Ar-C), 143.4 (Ar-C), 131.1 (Ar-CH), 130.2 (Ar-CH), 129.7 (Ar-CH), 129.0 (Ar-CH), 128.6 (Ar-CH), 128.5 (Ar-CH), 128.1 (Ar-CH), 124.6 (Ar-CH), 122.8 (Ar-C), 70.6 (CH, seen on HSQC), 68.8 ( $\text{CH}_2$ ), 58.5 ( $\text{CH}_2$ ), 21.8 ( $\text{CH}_3$ ), 2 Ar-C, 1 Ar-CH, C=O not seen; HRMS (ESI $^+$ ) calculated for  $\text{C}_{23}\text{H}_{23}^{79}\text{BrN}_2\text{O}_5\text{S}$  [ $\text{M}+\text{Na}$ ] $^+$  541.0403; found 541.0411.

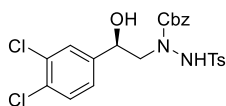

**Benzyl (R)-1-(2-(3,4-dichlorophenyl)-2-hydroxyethyl)-2-tosylhydrazine-1-carboxylate (6f).**

Following general method 3, aryl ketone **5f** (100 mg, 0.20 mmol, 1.0 equiv), catalyst **7c** (1.2 mg, 2.0  $\mu\text{mol}$ , 0.01 equiv), 5 : 2 formic acid : triethylamine complex (0.2 mL, 1 M) and dichloromethane (0.4 mL, 0.5 M) yielded **6f** as a white solid (100 mg, 0.2 mmol, 99%). M.p. 141-142  $^\circ\text{C}$ ;  $R_f$  = 0.21 (35% EtOAc in petroleum ether);  $[\alpha]^{32}_D$  -37.7 (c 0.12,  $\text{CHCl}_3$ ). Enantiomeric excess (92% ee) was determined by HPLC analysis (25  $^\circ\text{C}$ ). [Chiralpak OD-H column 2-propanol/hexane = 12/88; flow rate = 1.0 mL/min; detection wavelength = 254 nm]  $t_R$  18.4 min;  $t_R$  24.1 min; IR (film) 3424, 3118, 2968, 2891, 1715, 1466, 1394, 1203  $\text{cm}^{-1}$ ;  $\delta H$  (500 MHz;  $\text{CDCl}_3$ ) 7.73 (2H,

d,  $J$  8.0, Ar-H), 7.45 (1H, s, Ar-H), 7.40 (1H, d,  $J$  8.2, Ar-H), 7.36-7.32 (3H, m, Ar-H), 7.22 (2H, d,  $J$  8.1, Ar-H), 7.19-7.05 (4H, m, Ar-H), 5.12 (1H, dd,  $J$  9.1, 2.1, CHOH), 4.87 (2H, br s, CH<sub>2</sub>Ph), 3.81 (1H, t,  $J$  8.9, NCHH), 3.71 (1H, d,  $J$  13.8, NCHH) 2.42 (3H, s, CH<sub>3</sub>);  $\delta$ C (125 MHz; CDCl<sub>3</sub>) 144.9 (Ar-C), 141.2 (Ar-C), 132.8 (Ar-C), 131.9 (Ar-C), 130.6 (Ar-CH), 129.7 (Ar-CH), 129.7 (Ar-C, seen on HMBC), 128.7 (Ar-CH), 128.6 (Ar-CH), 128.5 (Ar-CH), 128.2 (Ar-CH), 128.0 (Ar-CH), 125.3 (Ar-CH), 70.5 (CH, seen on HSQC), 68.9 (CH<sub>2</sub>), 58.7 (CH<sub>2</sub>), 21.8 (CH<sub>3</sub>), 1 Ar-C, C=O not seen; HRMS (ESI<sup>+</sup>) calculated for C<sub>23</sub>H<sub>22</sub><sup>35</sup>Cl<sub>2</sub>N<sub>2</sub>O<sub>5</sub>S [M+Na]<sup>+</sup> 531.0519; found 531.0517.

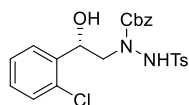

**Benzyl (S)-1-(2-(2-chlorophenyl)-2-hydroxyethyl)-2-tosylhydrazine-1-carboxylate (6g).**

Following general method 3, aryl ketone **5g** (100 mg, 0.20 mmol, 1.0 equiv), catalyst **7f** (1.3 mg, 2.0  $\mu$ mol, 0.01 equiv), 5 : 2 formic acid : triethylamine complex (0.2 mL, 1.0 M) and dichloromethane (0.4 mL, 0.5 M) yielded **6g** as a colourless oil (100 mg, 0.2 mmol, 99%).  $R_f$  = 0.21 (35% EtOAc in petroleum ether);  $[\alpha]_D^{32} +35.8$  (c 0.12, CHCl<sub>3</sub>). Enantiomeric excess (90% ee) was determined by HPLC analysis (25 °C). [Chiralpak IA column 2-propanol/hexane = 5/95; flow rate = 1.0 mL/min; detection wavelength = 254 nm]  $t_R$  57.1 min;  $t_R$  65.2 min; IR (film) 3443, 3115, 2896, 1717, 1457, 1432, 1250 cm<sup>-1</sup>;  $\delta$ H (500 MHz; CDCl<sub>3</sub>) 7.74 (2H, d,  $J$  7.8, Ar-H), 7.57 (1H, d,  $J$  7.5, Ar-H), 7.40 (1H, d,  $J$  8.2, Ar-H), 7.35-7.10 (9H, m, Ar-H), 5.48 (1H, m, CHOH), 4.88 (2H, br s, CH<sub>2</sub>Ph), 3.87 and 2.92 (minor rotamer) (2H, br s, NCH<sub>2</sub>), 2.40 (3H, s, CH<sub>3</sub>);  $\delta$ C (125 MHz; CDCl<sub>3</sub>) 144.6 (Ar-C), 138.4 (Ar-C), 131.9 (Ar-C), 129.6 (Ar-CH), 129.5 (Ar-CH), 129.1 (Ar-CH), 128.5 (Ar-CH), 128.2 (Ar-CH), 127.6 (Ar-CH), 127.2 (Ar-CH), 69.0 (CH, seen on HSQC), 68.7 (CH<sub>2</sub>), 56.6 (CH<sub>2</sub>), 21.7 (CH<sub>3</sub>), 2 Ar-C, 2 Ar-CH, C=O not seen; HRMS (ESI<sup>+</sup>) calculated for C<sub>23</sub>H<sub>24</sub><sup>35</sup>ClN<sub>2</sub>O<sub>5</sub>S [M+Na]<sup>+</sup> 497.0908; found 497.0905.

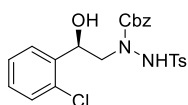

**Benzyl (R)-1-(2-(2-chlorophenyl)-2-hydroxyethyl)-2-tosylhydrazine-1-carboxylate (6g).**

Following general method 3, aryl ketone **5g** (100 mg, 0.20 mmol, 1.0 equiv), catalyst **7c** (1.3 mg, 2.0  $\mu$ mol, 0.01 equiv), 5 : 2 formic acid : triethylamine complex (0.2 mL, 1.0 M) and dichloromethane (0.4 mL, 0.5 M) yielded **6g** as a colourless oil (100 mg, 0.2 mmol, 99%).  $[\alpha]_D^{32} -14.7$  (c 0.10, CHCl<sub>3</sub>). Enantiomeric excess (19% ee) was determined by HPLC analysis (25 °C). [Chiralpak IA column 2-propanol/hexane = 5/95; flow rate = 1.0 mL/min; detection wavelength = 254 nm]  $t_R$  57.1 min;  $t_R$  65.2 min.

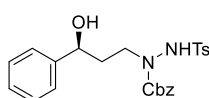

**Benzyl (S)-1-(3-hydroxy-3-phenylpropyl)-2-tosylhydrazine-1-carboxylate (6h).**

Following general method 3, aryl ketone **5h** (100 mg,

0.22 mmol), catalyst **7c** (1.4 mg, 2.2  $\mu$ mol), 5 : 2 formic acid : triethylamine complex (0.22 mL, 1.0 M) and dichloromethane (0.88 mL, 0.25 M) yielded **6h** as a colourless oil (100 mg, 0.22 mmol, 99%).  $R_f$  = 0.23 (35% EtOAc in petroleum ether);  $[\alpha]^{32}_D$   $-4.6$  ( $c$  0.75,  $\text{CHCl}_3$ ). Enantiomeric excess was determined after cyclisation to **8h**. IR (film) 3503, 3228, 2951, 1707, 1340, 1185  $\text{cm}^{-1}$ ;  $\delta H$  (500 MHz;  $\text{CDCl}_3$ ) 7.73 (2H, d,  $J$  7.9, Ar-CH), 7.38-7.29 (5H, m, Ar-H) 7.47 (4H, dd,  $J$  13.5 and 7.9, Ar-H), 7.21 (3H, d,  $J$  7.9, Ar-H), 7.02 (1H, br s, NH), 5.01-4.59 (3H, m,  $\text{CHOH}$  and  $\text{CH}_2\text{Ph}$ ), 3.84 (2H, br s,  $\text{NCH}_2$ ), 2.42 (3H, s,  $\text{CH}_3$ ) 2.09-2.03 (2H, m,  $\text{CH}_2\text{CHOH}$ );  $\delta C$  (125 MHz;  $\text{CDCl}_3$ ) 144.4 (Ar-C), 143.4 (Ar-C), 135.1 (Ar-C), 129.5 (Ar-CH), 128.6 (Ar-CH), 128.5 (Ar-CH), 128.5 (Ar-CH), 128.4 (Ar-CH), 128.1 (Ar-CH), 127.8 (Ar-CH), 125.6 (Ar-CH), 72.3 (CH), 68.4 ( $\text{CH}_2$ ), 48.7 ( $\text{CH}_2$ ), 35.0 ( $\text{CH}_2$ ), 21.7 ( $\text{CH}_3$ ), C=O and 1 Ar-C not seen; HRMS (ESI $^+$ ) calculated for  $\text{C}_{24}\text{H}_{26}\text{N}_2\text{O}_5\text{S}$   $[\text{M}+\text{Na}]^+$  477.1455; found 477.1457.

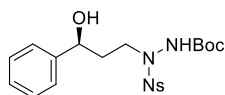

**tert-Butyl**

**(S)-2-(3-hydroxy-3-phenylpropyl)-2-((4-**

**nitrophenyl)sulfonyl)-hydrazine-1-carboxylate (6i).** Following general method 3, aryl ketone **5i** (100 mg, 0.22 mmol, 1.0 equiv), catalyst **7c** (1.4

mg, 2.2  $\mu$ mol, 0.01 equiv), 5 : 2 formic acid : triethylamine complex (0.22 mL, 1.0 M) and dichloromethane (0.88 mL, 0.25 M) yielded **6i** as a white solid (86 mg, 0.19 mmol, 86%).  $R_f$  = 0.18 (35% EtOAc in petroleum ether); M.p. 112-114  $^{\circ}\text{C}$ ;  $[\alpha]^{32}_D$   $-5.0$  ( $c$  0.30,  $\text{CHCl}_3$ ); enantiomeric excess was determined after cyclisation to **8i**. IR (film) 3512, 3287, 2951, 1712, 1620, 1350, 1158  $\text{cm}^{-1}$ ;  $\delta H$  (500 MHz;  $\text{CDCl}_3$ ) 8.28 (2H, d,  $J$  8.3, Ar-H), 8.04 (2H, t,  $J$  9.2, Ar-H), 7.29 (3H, d,  $J$  4.3, Ar-H), 7.28-7.19 (2H, m, Ar-H), 6.62 (1H, s, NH), 4.84 (1H, t,  $J$  6.1,  $\text{CHOH}$ ), 3.84-3.45 (2H, m,  $\text{NCH}_2$ ), 1.95 (2H, q,  $J$  6.1,  $\text{CH}_2\text{CHOH}$ ), 1.26-1.18 (9H, m,  $\text{C}(\text{CH}_3)_3$ );  $\delta C$  (125 MHz;  $\text{CDCl}_3$ ) 153.5 (C=O), 150.5 (Ar-C), 143.9 (Ar-C), 128.7 (Ar-CH), 128.6 (Ar-CH), 127.8 (Ar-CH), 125.7 (Ar-CH), 124.0 (Ar-CH), 83.3 (C) and 82.6 (minor rotamer), 71.7 (CH), 47.5 ( $\text{CH}_2$ ), 36.4 ( $\text{CH}_2$ ), 27.9 ( $\text{CH}_3$ ) and 27.8 (minor rotamer), 1 Ar-C not seen; HRMS (ESI $^+$ ) calculated for  $\text{C}_{20}\text{H}_{25}\text{N}_3\text{O}_7$   $[\text{M}+\text{Na}]^+$  474.1305; found 474.1307.

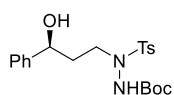

**tert-Butyl**

**(S)-2-(3-hydroxy-3-phenylpropyl)-2-tosylhydrazine-1-**

**carboxylate (6j).** Following general method 3, aryl ketone **5j** (97 mg, 0.23 mmol, 1.0 equiv), catalyst **7c** (1.4 mg, 2.3  $\mu$ mol, 0.01 equiv), 5 : 2 formic

acid : triethylamine complex (0.23 mL, 1.0 M) in dichloromethane (0.92 mL, 0.25 M) yielded **6j** as a colourless oil (96 mg, 0.23 mmol, 98%).  $R_f$  = 0.22 (35% EtOAc in petroleum ether);  $[\alpha]^{32}_D$   $-34.4$  ( $c$  0.20,  $\text{CHCl}_3$ ). Enantiomeric excess (96% ee) was determined by HPLC analysis (25  $^{\circ}\text{C}$ ). [Chiralpak IA column 2-propanol/hexane = 15/85; flow rate = 1.0 mL/min; detection wavelength = 254 nm]  $t_R$  15.4 min;  $t_R$  20.1 min; IR (film) 3294, 2985, 1745, 1393, 1159, 1055  $\text{cm}^{-1}$ ;  $\delta H$  (400 MHz;  $\text{CDCl}_3$ ) 7.81-7.79 (2H, m, Ar-H), 7.38-7.27 (7H, m, Ar-H), 6.45 (major) and 6.08 (minor) (1H, br s, NH), 4.97 (1H, br s,  $\text{CHOH}$ ), 3.68-3.48 (2H, m,



NCH<sub>2</sub>), 2.95 (1H, br s, OH), 2.42 (3H, s, Ts-CH<sub>3</sub>), 1.97 (2H, br s, CHCH<sub>2</sub>), 1.32 (9H, s, (CH<sub>3</sub>)<sub>3</sub>);  $\delta$ C (125 MHz; CDCl<sub>3</sub>) 153.9 (C=O), 144.7 (Ar-C), 144.6 (Ar-C), 133.8 (Ar-C), 129.7 (Ar-CH), 128.8 (Ar-CH), 128.6 (Ar-CH), 127.5 (Ar-CH), 125.8 (Ar-CH), 81.9 (C), 71.5 (CH), 47.8 (NCH<sub>2</sub>), 36.6 (CH<sub>2</sub>), 28.0 (CH<sub>3</sub>), 21.8 (CH<sub>3</sub>); HRMS (ESI<sup>+</sup>) calculated for C<sub>21</sub>H<sub>28</sub>N<sub>2</sub>NaO<sub>5</sub>S [M+Na]<sup>+</sup> 443.1611; found 443.1610.

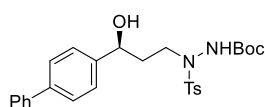

**tert-Butyl (S)-2-(3-([1,1'-biphenyl]-4-yl)-3-hydroxypropyl)-2-**

**tosylhydrazine-1-carboxylate (6k).** Following general method 3, aryl

ketone **5k** (100 mg, 0.20 mmol, 1.0 equiv), catalyst **7c** (1.3 mg, 2.0  $\mu$ mol, 0.01 equiv), 5 : 2 formic acid : triethylamine complex (0.20 mL, 1.0 M) and Dichloromethane (0.80 mL, 0.25 M) yielded **6k** as a white solid (100 mg, 0.20 mmol, 99%). M.p. 62-63 °C;  $R_f$  = 0.19 (35% EtOAc in petroleum ether);  $[\alpha]^{32}_D$  -17.7 (c 0.62, CHCl<sub>3</sub>). Enantiomeric excess was determined after cyclisation to **8k**. IR (film) 3513, 3303, 2926, 1704, 1391, 1247 cm<sup>-1</sup>;  $\delta$ H (500 MHz; CDCl<sub>3</sub>) 7.84 (2H, d,  $J$  7.1, Ar-CH), 7.60 (4H, t,  $J$  7.1, Ar-H) 7.47 (4H, dd,  $J$  13.5, 7.9, Ar-H), 7.36 (3H, t,  $J$  7.5, Ar-H), 6.40 (1H, br s, NH), 5.07 (1H, s, CHOH), 3.81-3.42 (2H, m, NCH<sub>2</sub>), 2.46 (3H, s, CH<sub>3</sub>) 2.09-1.96 (2H, m, CH<sub>2</sub>CHOH), 1.26 (9H, s, C(CH<sub>3</sub>)<sub>3</sub>);  $\delta$ C (125 MHz; CDCl<sub>3</sub>) 153.9 (C=O), 150.5 (Ar-C), 144.6 (Ar-C), 143.5 (Ar-C), 140.3 (Ar-C), 133.7 (Ar-C), 129.7 (Ar-CH), 128.8 (Ar-CH), 128.7 (Ar-CH), 127.2 (Ar-CH), 127.2 (Ar-CH), 127.1 (Ar-CH), 126.2 (Ar-CH), 81.9 (C), 71.2 (CH), 47.8 (CH<sub>2</sub>), 36.5 (CH<sub>2</sub>), 28.0 (CH<sub>3</sub>) 21.6 (CH<sub>3</sub>); HRMS (ESI<sup>+</sup>) calculated for C<sub>27</sub>H<sub>32</sub>N<sub>2</sub>O<sub>5</sub>S [M+Na]<sup>+</sup> 519.1924; found 519.1924.

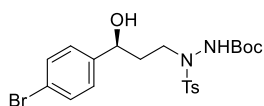

**tert-Butyl (S)-2-(3-(4-bromophenyl)-3-hydroxypropyl)-2-**

**tosylhydrazine-1-carboxylate (6l).** Following general method 3, aryl

ketone **5l** (100 mg, 0.20 mmol, 1.0 equiv), catalyst **7c** (1.27 mg, 2.0  $\mu$ mol), 5 : 2 formic acid : triethylamine complex (0.20 mL, 1.0 M) and dichloromethane (0.80 mL, 0.25 M) yielded **6l** as a white solid (100 mg, 0.20 mmol, 99%). M.p. 121-124 °C;  $R_f$  = 0.17 (35% EtOAc in petroleum ether);  $[\alpha]^{32}_D$  -25.8 (c 0.65, CHCl<sub>3</sub>). Enantiomeric excess (91% ee) was determined by HPLC analysis (25 °C). [Chiralpak OD-H column 2-propanol/hexane = 10/90; flow rate = 1.0 mL/min; detection wavelength = 254 nm]  $t_R$  25.0 min;  $t_R$  30.2 min. IR (film) 3513, 3303, 2925, 1704, 1367, 1247 cm<sup>-1</sup>;  $\delta$ H (500 MHz; CDCl<sub>3</sub>) 7.83 (2H, d,  $J$  7.1, Ar-CH), 7.48 (2H, d,  $J$  7.8, Ar-H), 7.36 (2H, d,  $J$  7.7, Ar-H), 7.36 (2H, d,  $J$  7.6, Ar-H), 5.02 (1H, br s, CHOH), 3.88-3.01 (2H, m, NCH<sub>2</sub>), 2.46 (3H, s, CH<sub>3</sub>) 2.05-1.82 (2H, m, CH<sub>2</sub>CHOH), 1.36 (9H, s, C(CH<sub>3</sub>)<sub>3</sub>);  $\delta$ C (125 MHz; CDCl<sub>3</sub>) 154.1 (C=O), 144.8 (Ar-C), 143.6 (Ar-C), 133.5 (Ar-C), 131.5 (Ar-CH), 129.7 (Ar-CH), 128.7 (Ar-CH), 127.5 (Ar-CH), 121.0 (Ar-C), 82.1 (C), 70.8 (CH), 47.8 (CH<sub>2</sub>), 36.5 (CH<sub>2</sub>), 27.9 (CH<sub>3</sub>), 21.6 (CH<sub>3</sub>); HRMS (ESI<sup>+</sup>) calculated for C<sub>21</sub>H<sub>27</sub><sup>79</sup>BrN<sub>2</sub>O<sub>5</sub>S [M+Na]<sup>+</sup> 521.0716; found 521.0716.

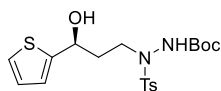

**tert-Butyl (S)-2-(3-hydroxy-3-(thiophen-2-yl)propyl)-2-tosylhydrazine-**

**1-carboxylate (6m).** Following general method 3, aryl ketone **5m** (100

mg, 0.24 mmol, 1.0 equiv), catalyst **7c** (1.5 mg, 2.4  $\mu$ mol, 0.01 equiv), 5 :

2 formic acid : triethylamine complex (0.24 mL, 1.0 M) and Dichloromethane (0.48 mL, 0.25 M) yielded **6m** as a colourless oil (97 mg, 0.23 mmol, 97%).  $R_f$  = 0.21 (35% EtOAc in petroleum ether);  $[\alpha]^{32}_D$  –6.5 ( $c$  0.13,  $\text{CHCl}_3$ ). Enantiomeric excess (98% ee) was determined by HPLC analysis (25  $^\circ\text{C}$ ). [Chiralpak IA column 2-propanol/hexane = 5/95; flow rate = 1.0 mL/min; detection wavelength = 254 nm]  $t_R$  22.4 min;  $t_R$  24.5 min; IR (film) 3453, 3309, 2926, 1704, 1354, 1252  $\text{cm}^{-1}$ ;  $\delta H$  (500 MHz;  $\text{CDCl}_3$ ) 7.82 (2H, d,  $J$  7.4, Ar-CH), 7.35 (2H, d,  $J$  6.6, Ar-H), 7.26 (1H, d,  $J$  4.0, Ar-H), 7.08-6.94 (2H, m, Ar-H), 6.43 (1H, s, NH), 5.27 (1H, br s, CHOH), 3.79-3.47 (2H, m,  $\text{NCH}_2$ ), 2.45 (3H, s,  $\text{CH}_3$ ) 2.20-2.03 (2H, m,  $\text{CH}_2\text{CHOH}$ ), 1.34 (9H, s,  $\text{C}(\text{CH}_3)_3$ );  $\delta C$  (125 MHz;  $\text{CDCl}_3$ ) 153.8 (C=O), 148.4 (Ar-C), 144.6 (Ar-C), 133.7 (Ar-C), 129.6 (Ar-CH), 128.7 (Ar-CH), 126.7 (Ar-CH), 124.4 (Ar-CH), 123.5 (Ar-CH), 82.0 (C), 67.7 (CH), 47.6 ( $\text{CH}_2$ ), 36.6 ( $\text{CH}_2$ ), 27.9 ( $\text{CH}_3$ ), 21.6 ( $\text{CH}_3$ ); HRMS (ESI $^+$ ) calculated for  $\text{C}_{19}\text{H}_{26}\text{N}_2\text{O}_5\text{S}_2$   $[\text{M}+\text{Na}]^+$  449.1175; found 449.1179.

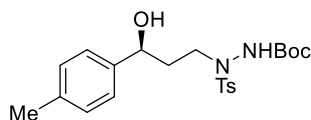

**tert-Butyl (S)-2-(3-hydroxy-3-(p-tolyl)propyl)-2-tosylhydrazine-**

**1-carboxylate ((S)-6n).** Following general method 3, aryl ketone

**5n** (433 mg, 1.00 mmol, 1.0 equiv), catalyst (S,S)-**7c** (6.2 mg, 10

$\mu$ mol, 1.0 mol%), formic acid : triethylamine (5 : 2) complex (1.0 mL, 1.0 M) and dichloromethane (3.0 mL, 0.33 M) yielded (S)-**6n** after purification by column chromatography (33-50% EtOAc/petroleum ether) as a colourless gum (432 mg, 0.99 mmol, 99%).  $R_f$  = 0.40 (50% EtOAc in petroleum ether);  $[\alpha]^{23}_D$  –23.4 ( $c$  0.46,  $\text{CHCl}_3$ ). Enantiomeric excess (96% ee) was determined by HPLC analysis (25  $^\circ\text{C}$ ). [Chiralpak IA column 2-propanol/hexane = 10/90; flow rate = 1.0 mL/min; detection wavelength = 254 nm]  $t_R$  24.3 min;  $t_R$  27.1 min; IR (neat) 3313, 2977, 2927, 1719, 1367, 1153, 813  $\text{cm}^{-1}$ ;  $\delta H$  (300 MHz;  $\text{CDCl}_3$ ) 7.82 (2H, d,  $J$  7.8, Ar- $H$ ), 7.34 (2H, d,  $J$  7.8, Ar- $H$ ), 7.29 (2H, d,  $J$  7.8, Ar- $H$ ), 7.17 (2H, d,  $J$  7.8, Ar- $H$ ), 6.40 (1H, br s, NH), 5.01-4.90 (1H, m, CHOH), 3.68 (1H, br m,  $\text{NCHH}$ ), 3.50 (1H, br m,  $\text{NCHH}$ ), 2.45 (3H, s,  $\text{CH}_3$ ), 2.36 (3H, s,  $\text{CH}_3$ ), 2.20 (1H, br s, OH), 1.98 (2H, dd,  $J$  11.5, 6.1,  $\text{CH}_2\text{CHOH}$ ), 1.35 (9H, s,  $(\text{CH}_3)_3$ );  $\delta C$  (101 MHz;  $\text{CDCl}_3$ ) 144.6 (Ar-C), 141.6 (Ar-C), 140.2 (Ar-C, seen on HMBC), 137.1 (Ar-C, seen on HMBC), 129.7 (Ar-CH), 129.2 (Ar-CH), 128.8 (Ar-CH), 125.8 (Ar-CH), 81.5 (C, seen on HMBC), 71.4 (CHOH), 47.7 ( $\text{NCH}_2$ ), 36.5 ( $\text{CH}_2\text{CHOH}$ ), 28.0 (Boc- $\text{CH}_3$ ), 21.7 ( $\text{CH}_3$ ), 21.2 ( $\text{CH}_3$ ), Boc-C=O not observed; HRMS (ESI $^+$ ) calculated for  $\text{C}_{22}\text{H}_{30}\text{N}_2\text{NaO}_5\text{S}$   $[\text{M}+\text{Na}]^+$  457.1768; found 457.1765.

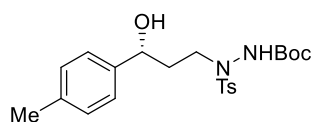

**tert-Butyl (R)-2-(3-hydroxy-3-(p-tolyl)propyl)-2-tosylhydrazine-1-carboxylate ((R)-6n).** Following general method 3, aryl ketone **5n** (433 mg, 1.00 mmol, 1.0 equiv), catalyst (*R,R*)-**7c** (3.1 mg, 5.0  $\mu$ mol, 1.0 mol%), formic acid : triethylamine (5 : 2) complex (1.0 mL, 1.0 M) and dichloromethane (3.0 mL, 0.33 M) yielded (*R*)-**6n** after purification by column chromatography (33-50% EtOAc/petroleum ether) as a colourless gum (373 mg, 0.86 mmol, 86%).  $[\alpha]_D^{22} +39.6$  (c 0.40, CHCl<sub>3</sub>). Enantiomeric excess (97% ee) was determined by HPLC analysis (25 °C). [Chiralpak IA column 2-propanol/hexane = 10/90; flow rate = 1.0 mL/min; detection wavelength = 254 nm]  $t_R$  24.6 min;  $t_R$  30.5 min.

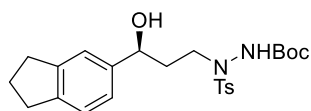

**tert-Butyl (S)-2-(3-(2,3-dihydro-1H-inden-5-yl)-3-hydroxypropyl)-2-tosylhydrazine-1-carboxylate (6o).** Following general method 3, aryl ketone **5o** (917 mg, 2.00 mmol, 1.0 equiv), catalyst **7c** (12.4 mg, 20  $\mu$ mol, 1.0 mol%), formic acid : triethylamine (5 : 2) complex (2.0 mL, 1.0 M) and dichloromethane (4.0 mL, 0.5 M) yielded **6o** after purification by column chromatography (33-50% EtOAc/petroleum ether) as a white foam (905 mg, 1.96 mmol, 98%). M.p. 41-43 °C;  $R_f$  = 0.52 (50% EtOAc in petroleum ether);  $[\alpha]_D^{23} -25.9$  (c 0.62, CHCl<sub>3</sub>). Enantiomeric excess (95% ee) was determined by HPLC analysis (25 °C). [Chiralpak IA column 2-propanol/hexane = 10/90; flow rate = 1.0 mL/min; detection wavelength = 254 nm]  $t_R$  24.3 min;  $t_R$  34.4 min; IR (neat) 3311, 2930, 2846, 1704, 1351, 1246, 1152, 814, 715 cm<sup>-1</sup>;  $\delta H$  (300 MHz; CDCl<sub>3</sub>) 7.80 (2H, d,  $J$  7.7, Ar-*H*), 7.32 (2H, d,  $J$  7.7, Ar-*H*), 7.24 (1H, s, Ar-*H*), 7.19 (1H, d,  $J$  7.8, Ar-*H*), 7.12 (1H, d,  $J$  7.8, Ar-*H*), 6.38 (1H, br s, NH), 4.92 (1H, t,  $J$  4.9, CHOH), 3.67 (1H, br m, NCHH), 3.50 (1H, br m, NCHH), 2.89 (4H, t,  $J$  7.3, CH<sub>2</sub>), 2.67 (1H, br s, OH), 2.43 (3H, s, CH<sub>3</sub>), 2.07 (2H, p,  $J$  7.3, CH<sub>2</sub>CH<sub>2</sub>CH<sub>2</sub>), 1.97 (2H, dd,  $J$  11.8, 6.1, CH<sub>2</sub>CHOH), 1.32 (9H, s, (CH<sub>3</sub>)<sub>3</sub>);  $\delta C$  (101 MHz; CDCl<sub>3</sub>) 144.6 (Ar-C), 144.2 (Ar-C, seen on HMBC), 143.6 (Ar-C, seen on HMBC), 133.5 (Ar-C, seen on HMBC), 129.7 (Ar-CH), 128.8 (Ar-CH), 124.4 (Ar-CH), 123.8 (Ar-CH), 121.9 (Ar-CH), 81.5 (C, seen on HMBC), 71.8 (CHOH), 47.8 (NCH<sub>2</sub>), 36.7 (CH<sub>2</sub>CHOH), 32.9 (CH<sub>2</sub>), 32.7 (CH<sub>2</sub>), 28.1 (Boc-CH<sub>3</sub>), 25.6 (CH<sub>2</sub>CH<sub>2</sub>CH<sub>2</sub>), 21.7 (CH<sub>3</sub>), one Ar-C and Boc-C=O not observed; HRMS (ESI<sup>+</sup>) calculated for C<sub>24</sub>H<sub>32</sub>N<sub>2</sub>NaO<sub>5</sub>S [M+Na]<sup>+</sup> 483.1924; found 483.1921.

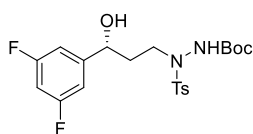

**tert-Butyl (R)-2-(3-(3,5-difluorophenyl)-3-hydroxypropyl)-2-tosylhydrazine-1-carboxylate (6p).** Following general procedure 4, aryl ketone **5p** (572 mg, 1.26 mmol, 1.0 equiv), (*R,R*)-catalyst **7f** (8.4 mg, 13  $\mu$ mol, 0.01 equiv), 5:2 FA:TEA complex (1.26 mL, 1 M) and CH<sub>2</sub>Cl<sub>2</sub> (5 mL, 0.25 M) yielded **6p** as a white solid (572 mg, 1.26 mmol, 99%).  $R_f$  = 0.46 (33% EtOAc in petroleum ether);  $[\alpha]_D^{24} +55.3$  (c 0.03, CHCl<sub>3</sub>); Enantiomeric excess (93% ee) was determined by HPLC

analysis (25 °C). [Chiralpak IA column 2-propanol/hexane = 10/90; flow rate = 1.0 mL/min; detection wavelength = 254 nm]  $t_R$  13.5 min;  $t_R$  16.3 min. M.p. 110-111 °C; IR (film) 3333, 3165, 2980, 1740, 1625, 1183  $\text{cm}^{-1}$ ;  $\delta H$  (500 MHz;  $\text{CDCl}_3$ ) 7.84 (2H, d,  $J$  7.4, Ar-H), 7.37 (2H, d,  $J$  7.8, Ar-H), 6.95 (2H, d,  $J$  6.3, Ar-H), 6.70 (1H, t,  $J$  7.7, Ar-H), 6.33 (1H, s, NH), 5.08 (1H, d,  $J$  5.1, CHOH), 3.79-3.65 (1H, br m, CHHN), 3.48-3.37 (1H, br m, CHHN), 2.46 (3H, s,  $\text{CH}_3$ ), 2.04-1.95 (1H, br m, CHOHCHH), 1.92-1.79 (1H, br m, CHOHCHH), 1.37 (9H, s,  $\text{C}(\text{CH}_3)_3$ );  $\delta C$  (125 MHz;  $\text{CDCl}_3$ ) 163.1 (dd,  $J$  246.2, 12.5, Ar-CF), 154.3 (C=O), 149.0 (Ar-C), 144.9 (Ar-C), 133.3 (Ar-C), 129.7 (Ar-CH), 128.7 (Ar-CH), 108.5 (dd,  $J$  21.3, 6.3, Ar-CH), 102.4 (t,  $J$  26.3, Ar-CH), 82.3 (C), 70.4 (CH), 47.8 ( $\text{CH}_2$ ), 36.4 ( $\text{CH}_2$ ), 27.9 ( $\text{CH}_3$ ), 21.6 ( $\text{CH}_3$ );  $\delta F$  (376 MHz;  $\text{CDCl}_3$ ) -109.9 (Ar-CF); HRMS (ESI<sup>+</sup>) calculated for  $\text{C}_{21}\text{H}_{26}\text{N}_2\text{NaO}_5\text{SF}_2$   $[\text{M}+\text{Na}]^+$  479.1423; found 479.1421.

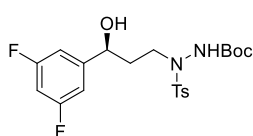

**tert-Butyl (S)-2-(3-(3,5-difluorophenyl)-3-hydroxypropyl)-2-tosylhydrazine-1-carboxylate (6p).** Following general procedure 4,

aryl ketone **5p** (266 mg, 0.59 mmol, 1.0 equiv), (S,S)-catalyst **7c** (3.6 mg, 6  $\mu\text{mol}$ , 0.01 equiv), 5:2 FA:TEA complex (0.59 mL, 1 M) and  $\text{CH}_2\text{Cl}_2$  (2.4 mL, 0.25 M) yielded **6p** as a white solid (266 mg, 0.59 mmol, 99%).  $[\alpha]_D^{24}$  -14.2 (c 0.10,  $\text{CHCl}_3$ ); Enantiomeric excess (80% ee) was determined by HPLC analysis (25 °C). [Chiralpak IA column 2-propanol/hexane = 10/90; flow rate = 1.0 mL/min; detection wavelength = 254 nm]  $t_R$  13.5 min;  $t_R$  16.3 min.

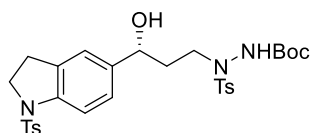

**tert-Butyl (R)-2-(3-hydroxy-3-(1-tosylindolin-5-yl)propyl)-2-tosylhydrazine-1-carboxylate ((R)-6q).** Following general method 3, aryl ketone **5q** (1.42 g, 2.31 mmol, 1.0 equiv), catalyst (R,R)-**7c**

(14.3 mg, 23  $\mu\text{mol}$ , 1.0 mol%), formic acid : triethylamine (5 : 2) complex (2.3 mL, 1.0 M) and dichloromethane (6.9 mL, 0.33 M) yielded (R)-**6q** after purification by column chromatography (33-50% EtOAc/petroleum ether) as a white foam (1.13 g, 1.84 mmol, 92%). M.p. 65-68 °C;  $R_f$  = 0.22 (50% EtOAc in petroleum ether);  $[\alpha]_D^{22}$  +20.9 (c 0.32,  $\text{CHCl}_3$ ). Enantiomeric excess (88% ee) was determined by HPLC analysis (25 °C). [Chiralpak IA column 2-propanol/hexane = 20/80; flow rate = 1.0 mL/min; detection wavelength = 254 nm]  $t_R$  41.3 min;  $t_R$  46.2 min; IR (neat) 3305, 2928, 1722, 1599, 1486, 1350, 1245, 1158, 1089, 1052, 974, 813  $\text{cm}^{-1}$ ;  $\delta H$  (400 MHz;  $\text{CDCl}_3$ ) 7.79 (2H, d,  $J$  8.0, Ar-H), 7.66 (2H, d,  $J$  8.0, Ar-H), 7.58 (1H, d,  $J$  8.4, Ar-H), 7.32 (2H, d,  $J$  8.0, Ar-H), 7.22 (2H, d,  $J$  8.0, Ar-H), 7.17 (1H, d,  $J$  8.4, Ar-H), 7.13 (1H, s, Ar-H), 6.32 (1H, br s, NH), 4.91 (1H, br m, CHOH), 3.90 (2H, t,  $J$  8.4,  $\text{NCH}_2\text{CH}_2\text{C}$ ), 3.64 (1H, br m,  $\text{NCHHCH}_2\text{CO}$ ), 3.44 (1H, br m,  $\text{NCHHCH}_2\text{CO}$ ), 2.94 (1H, br s, OH), 2.87 (2H, t,  $J$  8.2,  $\text{NCH}_2\text{CH}_2\text{C}$ ), 2.43 (3H, s,  $\text{CH}_3$ ), 2.37 (3H, s,  $\text{CH}_3$ ), 1.98-1.83 (2H, m,  $\text{NCH}_2\text{CH}_2\text{CO}$ ), 1.32 (9H, s,  $(\text{CH}_3)_3$ );  $\delta C$  (151 MHz;  $\text{CDCl}_3$ ) 144.8 (Ar-C), 144.2 (Ar-C), 141.4

(Ar-C), 140.3 (Ar-C, seen on HMBC), 134.0 (Ar-C), 132.2 (Ar-C), 129.82 (Ar-CH), 129.80 (Ar-CH), 128.8 (Ar-CH), 127.5 (Ar-CH), 125.5 (Ar-CH), 122.8 (Ar-CH), 114.9 (Ar-CH), 81.8 (C, seen on HMBC), 71.4 (CHOH), 50.3 (NCH<sub>2</sub>CH<sub>2</sub>C), 47.9 (NCH<sub>2</sub>CH<sub>2</sub>CHOH, seen on HMBC), 36.1 (NCH<sub>2</sub>CH<sub>2</sub>CHOH, seen on HMBC), 28.1 (Boc-CH<sub>3</sub>), 28.0 (NCH<sub>2</sub>CH<sub>2</sub>C), 21.8 (CH<sub>3</sub>), 21.7 (CH<sub>3</sub>), one Ar-C Boc-C=O not observed; HRMS (ESI<sup>+</sup>) calculated for C<sub>30</sub>H<sub>37</sub>N<sub>3</sub>NaO<sub>7</sub>S<sub>2</sub> [M+Na]<sup>+</sup> 638.1965; found 638.1961.

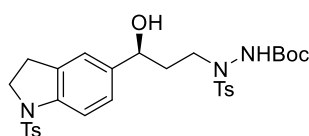

**tert-Butyl (S)-2-(3-hydroxy-3-(1-tosylindolin-5-yl)propyl)-2-tosylhydrazine-1-carboxylate ((S)-6q).**

Following general method 3, aryl ketone **5q** (505 mg, 0.82 mmol, 1.0 equiv), catalyst (S,S)-**7c** (5.1 mg, 8.2 μmol, 1.0 mol%), formic acid : triethylamine (5 : 2) complex (0.8 mL, 1.0 M) and dichloromethane (1.6 mL, 0.5 M) yielded (S)-**6q** after purification by column chromatography (33-50% EtOAc/petroleum ether) as a colourless gum (356 mg, 0.58 mmol, 71%). [α]<sub>D</sub><sup>22</sup> – 20.6 (c 0.38, CHCl<sub>3</sub>). Enantiomeric excess (89% ee) was determined by HPLC analysis (25 °C). [Chiralpak IA column 2-propanol/hexane = 20/80; flow rate = 1.0 mL/min; detection wavelength = 254 nm] *t*<sub>R</sub> 39.7 min; *t*<sub>R</sub> 47.1 min.

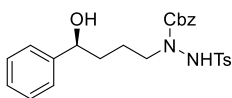

**Benzyl (S)-1-(4-hydroxy-4-phenylbutyl)-2-tosylhydrazine-1-carboxylate (6r).**

Following general method 3, aryl ketone **5r** (60 mg, 0.13 mmol, 1.0 equiv), catalyst **7c** (1 mg, 1.3 μmol, 0.01 equiv), 5 : 2 formic acid : triethylamine complex (0.13 mL, 1.0 M) and dichloromethane (0.26 mL, 0.5 M) yielded **6r** as a colourless oil (60 mg, 0.13 mmol, 99%). *R*<sub>f</sub> = 0.20 (35% EtOAc in petroleum ether); [α]<sub>D</sub><sup>32</sup> – 13.0 (c 0.92, CHCl<sub>3</sub>); enantiomeric excess was determined after cyclisation to **8r**; IR (film) 3510, 3285, 2946, 1717, 1375, 1184 cm<sup>-1</sup>; δ*H* (500 MHz; CDCl<sub>3</sub>) 7.72 (2H, d, *J* 8.0, Ar-H), 7.40-7.30 (8H, m, Ar-H), 7.21 (2H, d, *J* 8.1, Ar-H), 7.12 (2H, d, *J* 6.1, Ar-H), 4.88 (2H, s, CH<sub>2</sub>Ph), 4.69 (1H, s, CHOH), 3.70 (2H, br s, NCH<sub>2</sub>), 2.42 (3H, s, CH<sub>3</sub>), 1.85-1.62 (4H, m, CH<sub>2</sub>CH<sub>2</sub>CHOH); δ*C* (125 MHz; CDCl<sub>3</sub>) 144.5 (Ar-C), 144.4 (Ar-C), 135.2 (Ar-C), 129.5 (Ar-CH), 128.6 (Ar-CH), 128.5 (Ar-CH), 128.5 (Ar-CH), 128.1 (Ar-CH), 127.7 (Ar-CH), 125.8 (Ar-CH), 74.2 (CH), 68.4 (CH<sub>2</sub>), 50.8 (CH<sub>2</sub>), 35.7 (CH<sub>2</sub>), 23.4 (CH<sub>2</sub>), 21.7 (CH<sub>3</sub>), C=O, 1 Ar-C and 1 Ar-CH not seen; HRMS (ESI<sup>+</sup>) calculated for C<sub>25</sub>H<sub>26</sub>N<sub>2</sub>O<sub>5</sub>S [M+Na]<sup>+</sup> 489.1455; found 489.1455.

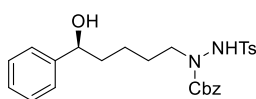

**Benzyl (S)-1-(5-hydroxy-5-phenylpentyl)-2-tosylhydrazine-1-carboxylate (6s).**

Following general method 3, aryl ketone **5** (80 mg, 0.17 mmol, 1.0 equiv), catalyst **7c** (1.0 mg, 1.7 μmol, 0.01 equiv), 5 : 2 formic acid : triethylamine complex (0.17 mL, 1.0 M) and dichloromethane (0.34 mL, 0.5 M)

yielded **6s** as a colourless oil (80 mg, 0.17 mmol, 99%).  $R_f = 0.20$  (35% EtOAc in petroleum ether);  $[\alpha]^{32}_D -8.2$  ( $c$  1.13,  $\text{CHCl}_3$ ). Enantiomeric excess was determined after cyclisation to **8s**; IR (film) 3489, 3233, 2925, 1707, 1340, 1215  $\text{cm}^{-1}$ ;  $\delta H$  (500 MHz;  $\text{CDCl}_3$ ) 7.72 (2H, d,  $J$  8.0, Ar-H), 7.38-7.31 (8H, m, Ar-H), 7.21 (2H, d,  $J$  8.1, Ar-H), 7.14 (2H, s, Ar-H), 6.91 (1H, s, NH), 4.88 (2H, s,  $\text{CH}_2\text{Ph}$ ), 4.69-4.61 (1H, m,  $\text{CHOH}$ ), 3.65 (2H, br s,  $\text{NCH}_2$ ), 2.42 (3H, s,  $\text{CH}_3$ ) 1.85-1.62 (4H, m,  $\text{NCH}_2\text{CH}_2$  and  $\text{CH}_2\text{CHOH}$ ), 1.42-1.31 (2H, m,  $\text{CH}_2\text{CH}_2\text{CH}_2$ );  $\delta C$  (125 MHz;  $\text{CDCl}_3$ ) 144.6 (Ar-C), 144.5 (Ar-C), 135.2 (Ar-C), 129.5 (Ar-CH), 128.5 (Ar-CH), 128.5 (Ar-CH), 128.1 (Ar-CH), 127.6 (Ar-CH), 125.8 (Ar-CH), 74.3 (CH), 68.3 ( $\text{CH}_2$ ), 50.9 ( $\text{CH}_2$ ), 38.5 ( $\text{CH}_2$ ), 26.7 ( $\text{CH}_2$ ), 22.6 ( $\text{CH}_2$ ), 21.7 ( $\text{CH}_3$ ), 1 C=O, 1 Ar-C and 2 Ar-CH not seen; HRMS (ESI<sup>+</sup>) calculated for  $\text{C}_{26}\text{H}_{30}\text{N}_2\text{O}_5\text{S}$   $[\text{M}+\text{Na}]^+$  505.1768; found 505.1767.

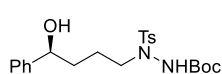

**tert-Butyl (S)-2-(4-hydroxy-4-phenylbutyl)-2-tosylhydrazine-1-carboxylate (6t).**

Following general method 3, aryl ketone **5t** (5.21 g, 12.0 mmol, 1.0 equiv) catalyst **7c** (37 mg, 60  $\mu\text{mol}$ , 0.5 mol%), formic acid : triethylamine (5 : 2) complex (12 mL, 1.0 M), dichloromethane (24 mL, 0.5 M) yielded **6t** as a white, sticky foam (5.21 g, 12.0 mmol) in quantitative yield.  $R_f = 0.35$  (50% EtOAc in petroleum ether);  $[\alpha]^{28}_D -18.0$  ( $c$  0.32,  $\text{CHCl}_3$ ). Enantiomeric excess (91% ee) was determined by HPLC analysis (25 °C). [Chiralpak OD-H column 2-propanol/hexane = 2.5/97.5; flow rate = 1.0 mL/min; detection wavelength = 254 nm]  $t_R$  87.8 min;  $t_R$  97.6 min; IR (neat) 2979, 2930, 1703, 1351, 1151, 1088, 753, 700, 659  $\text{cm}^{-1}$ ;  $\delta H$  (500 MHz;  $\text{CDCl}_3$ ) 7.76 (2H, d,  $J$  7.8, Ar-H), 7.35-7.33 (4H, m, Ar-H), 7.33-7.27 (3H, m, Ar-H), 6.27 (0.70H, br s, NH major), 5.77 (0.30H, br s, NH minor), 4.77 (1H, br s,  $\text{CHOH}$ ), 3.44 (2H, br s, 2H,  $\text{NCH}_2$ ), 2.45 (1H, br s, OH), 2.42 (3H, s,  $\text{CH}_3$ ), 1.92-1.82 (2H, m,  $\text{CH}_2\text{CHOH}$ ), 1.75-1.63 (2H, m,  $\text{CH}_2\text{CH}_2\text{N}$ ), 1.31 (9H, br s,  $(\text{CH}_3)_3$ );  $\delta C$  (125 MHz;  $\text{CDCl}_3$ ) 153.8 (Boc-C=O), 144.8 (Ar-C), 144.6 (Ar-C), 134.0 (Ar-C), 129.7 (Ar-CH), 128.7 (Ar-CH), 128.5 (Ar-CH), 127.5 (Ar-CH), 125.9 (Ar-CH), 81.9 (C), 73.5 ( $\text{CHOH}$ ), 50.0 ( $\text{NCH}_2$ ), 36.3 ( $\text{CH}_2\text{CHOH}$ ), 28.1 (Boc- $\text{CH}_3$ ), 23.0 ( $\text{CH}_2\text{CH}_2\text{N}$ ), 21.7 ( $\text{CH}_3$ ); HRMS (ESI<sup>+</sup>) calculated for  $\text{C}_{22}\text{H}_{30}\text{N}_2\text{NaO}_5\text{S}$   $[\text{M}+\text{Na}]^+$  457.1768; found 457.1763.

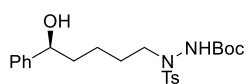

**tert-Butyl (S)-2-(5-hydroxy-5-phenylpentyl)-2-tosylhydrazine-1-carboxylate (6u).**

Following general method 3, aryl ketone **5u** (2.60 g, 5.82 mmol, 1.0 equiv), catalyst **7c** (18 mg, 29  $\mu\text{mol}$ , 0.5 mol%), formic acid : triethylamine (5 : 2) complex (6.0 mL, 1.0 M), dichloromethane (12 mL, 0.5 M) yielded **6u** as a white solid (2.46 g, 5.48 mmol, 94%). M.p. 83.5-85 °C;  $R_f = 0.43$  (50% EtOAc in petroleum ether);  $[\alpha]^{28}_D -18.4$  ( $c$  0.35,  $\text{CHCl}_3$ ). Enantiomeric excess (93% ee) was determined by HPLC analysis (25 °C). [Chiralpak OD-H column 2-propanol/hexane = 4/96; flow rate = 1.0 mL/min; detection wavelength = 254 nm]  $t_R$  39.8 min;  $t_R$  47.0 min; IR (neat) 3310, 2930, 1702, 1351, 1151, 756, 700, 659  $\text{cm}^{-1}$ ;  $\delta H$  (400 MHz;  $\text{CDCl}_3$ ) 7.75 (2H, d,  $J$  7.0, Ar-H), 7.34 (4H, d,  $J$  3.8,

Ar-*H*), 7.32-7.27 (3H, m, Ar-*H*), 6.35 (0.80H, br s, *NH* major), 5.81 (0.20H, br s, *NH* minor), 4.66 (1H, t, *J* 6.1, *CHOH*), 3.41 (2H, br d, *J* 16.7, *NCH*<sub>2</sub>), 2.41 (3H, s, *CH*<sub>3</sub>), 2.21 (1H, br s, *OH*), 1.84-1.77 (1H, m, *CHHCHOH*), 1.76-1.69 (1H, m, *CHHCHOH*), 1.59 (2H, tt, *J* 10.5, 5.4, *CH*<sub>2</sub>*CH*<sub>2</sub>*N*), 1.55-1.49 (1H, m, *CHHCH*<sub>2</sub>*CH*<sub>2</sub>*N*), 1.48-1.39 (1H, m, *CHHCH*<sub>2</sub>*CH*<sub>2</sub>*N*), 1.31 (9H, br s, (*CH*<sub>3</sub>)<sub>3</sub>);  $\delta$ C (125 MHz; CDCl<sub>3</sub>) 153.5 (C=O), 144.9 (Ar-C), 144.4 (Ar-C), 134.3 (Ar-C), 129.6 (Ar-CH), 128.7 (Ar-CH), 128.6 (Ar-CH), 127.6 (Ar-CH), 126.0 (Ar-CH), 81.7 (C), 74.1 (*CHOH*), 49.8 (*NCH*<sub>2</sub>), 38.7 (*CH*<sub>2</sub>*CHOH*), 28.1 (Boc-*CH*<sub>3</sub>), 26.9 (*CH*<sub>2</sub>*CH*<sub>2</sub>*N*), 22.8 (*CH*<sub>2</sub>*CH*<sub>2</sub>*CH*<sub>2</sub>*N*), 21.7 (*CH*<sub>3</sub>). HRMS (ESI<sup>+</sup>) calculated for C<sub>23</sub>H<sub>32</sub>N<sub>2</sub>NaO<sub>5</sub>S [M+Na]<sup>+</sup> 471.1924; found 471.1921.

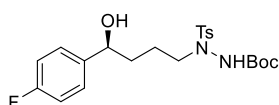

**tert-Butyl (S)-2-(4-(4-fluorophenyl)-4-hydroxybutyl)-2-tosylhydrazine-1-carboxylate (6v).** Following general method 3,

aryl ketone **5v** (3.25 g, 7.21 mmol, 1.0 equiv), catalyst **7c** (22 mg, 36  $\mu$ mol, 0.5 mol%), formic acid : triethylamine (5 : 2) complex (7.0 mL, 1.0 M), dichloromethane (14 mL, 0.5 M) yielded **6v** as a colourless gum (3.26 g, 7.21 mmol) in quantitative yield. *R*<sub>f</sub> = 0.36 (50% EtOAc in petroleum ether); [ $\alpha$ ]<sub>D</sub><sup>28</sup> –13.9 (*c* 0.94, CHCl<sub>3</sub>). Enantiomeric excess (87% ee) was determined by HPLC analysis (25 °C). [Chiralpak OD-H column 2-propanol/hexane = 4/96; flow rate = 1.0 mL/min; detection wavelength = 254 nm] *t*<sub>R</sub> 29.9 min; *t*<sub>R</sub> 34.4 min; IR (neat) 3310, 2979, 2930, 1703, 1509, 1350, 1220, 1152, 813, 658 cm<sup>-1</sup>;  $\delta$ H (400 MHz; CDCl<sub>3</sub>) 7.76 (2H, d, *J* 7.9, Ar-*H*), 7.37-7.27 (4H, m, Ar-*H*), 7.02 (2H, t, *J* 8.6, Ar-*H*), 6.23 (0.75H, br s, *NH* major), 5.77 (0.25H, br s, *NH* minor), 4.78 (1H, br s, *CHOH*), 3.46 (1H, br s, *NCHH*), 3.41 (1H, br s, *NCHH*), 2.57 (1H, br s, *OH*), 2.42 (3H, s, *CH*<sub>3</sub>), 1.94-1.78 (2H, m, *CH*<sub>2</sub>*CHOH*), 1.71-1.61 (2H, m, *CH*<sub>2</sub>*CH*<sub>2</sub>*N*), 1.31 (9H, br s, (*CH*<sub>3</sub>)<sub>3</sub>);  $\delta$ C (125 MHz; CDCl<sub>3</sub>) 162.2 (d, *J* 244.7, CF), 154.0 (Boc-C=O), 144.7 (Ar-C), 140.6 (Ar-C), 133.8 (Ar-C), 129.8 (Ar-CH), 128.8 (Ar-CH), 127.5 (d, *J* 8.0, Ar-CH), 115.3 (d, *J* 21.1, Ar-CH), 82.0 (C), 72.7 (*CHOH*), 50.0 (*NCH*<sub>2</sub>), 36.5 (*CH*<sub>2</sub>*CHOH*), 28.1 (Boc-*CH*<sub>3</sub>), 22.8 (*CH*<sub>2</sub>*CH*<sub>2</sub>*N*), 21.7 (*CH*<sub>3</sub>);  $\delta$ F (376 MHz; CDCl<sub>3</sub>) –115.6 (CF); HRMS (ESI<sup>+</sup>) calculated for C<sub>22</sub>H<sub>29</sub>FN<sub>2</sub>NaO<sub>5</sub>S [M+Na]<sup>+</sup> 475.1673; found 475.1671.

**General method 4: Mitsunobu cyclisation**

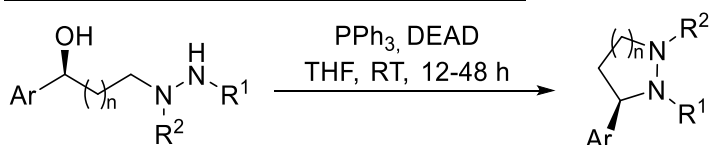

To a solution of alcohol (1.0 equiv) in tetrahydrofuran (0.01 M) was added triphenylphosphine (1.5-2.5 equiv) and diethyl azodicarboxylate (1.5-2.5 equiv). The reaction mixture was stirred at rt until completion of the reaction (12-48 h, monitored by TLC). The

reaction mixture was concentrated *in vacuo*. The crude product was purified by column chromatography (20-30% EtOAc in petroleum ether) to give the following compounds.

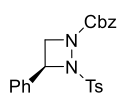

**Benzyl (S)-3-phenyl-2-tosyl-1,2-diazetidene-1-carboxylate (8a).** Following general method 4, **6a** (91 mg, 0.21 mmol, 1.0 equiv), triphenylphosphine (142 mg, 0.54 mmol, 2.5 equiv), diethyl azodicarboxylate (77  $\mu$ L, 0.54 mmol, 2.5 equiv) in tetrahydrofuran (21 mL, 0.01 M) yielded **8a** as a white solid (75 mg, 0.18 mmol, 86%).  $R_f$  = 0.32 (20% EtOAc in petroleum ether); M.p. 113-114.5  $^{\circ}$ C;  $[\alpha]_D^{32} +21.5$  (c 0.50,  $\text{CHCl}_3$ ); Enantiomeric excess (96% ee) was determined by HPLC analysis (25  $^{\circ}$ C). [Chiralcel ODH column 2-propanol/hexane = 10/90; flow rate = 1.0 mL/min; detection wavelength = 254 nm]  $t_R$  21.7 min;  $t_R$  27.2 min. IR (film) 3032, 1751, 1720, 1305, 1185  $\text{cm}^{-1}$ ;  $\delta H$  (400 MHz;  $\text{CDCl}_3$ ) 7.89-7.87 (2H, m, Ar-H), 7.34-7.31 (12H, m, Ar-H), 5.25-4.96 (3H, m,  $\text{CHPh}$  and  $\text{OCH}_2\text{Ph}$ ), 4.23 (1H, t,  $J$  8.6, NCHH), 4.00 (1H, t,  $J$  8.6, NCHH), 2.44 (3H, s, Ts- $\text{CH}_3$ );  $\delta C$  (100 MHz;  $\text{CDCl}_3$ ) 160.3 (C=O), 145.4 (Ar-C), 137.3 (Ar-C), 135.5 (Ar-C), 130.6 (Ar-C), 130.1 (Ar-CH), 129.0 (Ar-CH), 128.8 (Ar-CH), 128.6 (Ar-CH), 128.4 (Ar-CH), 126.4 (Ar-CH), 68.5 ( $\text{CH}_2$ ), 61.6 (CH), 56.6 ( $\text{CH}_2$ ), 21.9 ( $\text{CH}_3$ ), 2 Ar-CH not seen; HRMS (ESI $^+$ ) calculated for  $\text{C}_{23}\text{H}_{22}\text{N}_2\text{NaO}_4\text{S}$   $[\text{M}+\text{Na}]^+$  445.1192; found 445.1194.

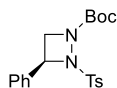

**tert-Butyl (S)-3-phenyl-2-tosyl-1,2-diazetidene-1-carboxylate (8b)** Following general procedure 5, alcohol **6b** (450 mg, 1.11 mmol, 1.0 equiv), triphenylphosphine (727 mg, 2.77 mmol, 2.5 equiv), diethylazodicarboxylate (436  $\mu$ L, 2.77 mmol, 2.5 equiv) and tetrahydrofuran (111 mL, 0.01 M) yielded **8b** as a white solid (328 mg, 0.84 mmol, 76%).  $R_f$  = 0.25 (15% EtOAc/petroleum ether); M.p. 166-167  $^{\circ}$ C;  $[\alpha]_D^{28} +7.6$  (c 0.09,  $\text{CHCl}_3$ ); Enantiomeric excess (98% ee) was determined by HPLC analysis (25  $^{\circ}$ C). [Chiralpak IA column 2-propanol/hexane = 0.6/99.4; flow rate = 1.0 mL/min; detection wavelength = 254 nm]  $t_R$  54.5 min;  $t_R$  63.1 min. IR (film) 2980, 2932, 1733, 1395, 1358  $\text{cm}^{-1}$ ;  $\delta H$  (500 MHz,  $\text{CDCl}_3$ ) 7.93 (2H, d,  $J$  8.2, Ar-CH), 7.37 (7H, m, Ar-CH), 5.06 (1H, dd,  $J$  8.7, 5.9,  $\text{CHPh}$ ), 4.21 (1H, t,  $J$  8.7, NCHH), 3.96 (1H, dd,  $J$  8.5, 5.9, NCHH), 2.51 (3H, s,  $\text{CH}_3$ ), 1.45 (9H, s,  $\text{C}(\text{CH}_3)_3$ );  $\delta C$  (125 MHz,  $\text{CDCl}_3$ ) 159.3 (C=O), 145.2 (Ar-C), 137.6 (Ar-C), 130.8 (Ar-CH), 130.1 (Ar-CH), 130.0 (Ar-C), 129.6 (Ar-CH), 128.9 (Ar-CH), 126.4 (Ar-CH), 82.9 (C), 61.3 (CH), 56.3 ( $\text{CH}_2$ ), 28.0 ( $\text{CH}_3$ ), 21.8 ( $\text{CH}_3$ ); HRMS (ES $^+$ ) calculated for  $\text{C}_{20}\text{H}_{24}\text{N}_2\text{O}_4\text{S}$  (M+Na) $^+$  411.1349; found 411.1352.

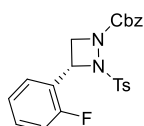

**Benzyl (R)-3-(2-fluorophenyl)-2-tosyl-1,2-diazetidene-1-carboxylate (8c).** Following general method 4, **6c** (44 mg, 0.10 mmol, 1.0 equiv),



triphenylphosphine (36 mg, 0.15 mmol, 1.5 equiv), diethyl azodicarboxylate (22  $\mu$ L, 0.15 mmol, 1.5 equiv) and tetrahydrofuran (10 mL, 0.01 M) yielded **8c** as a colourless oil (32 mg, 70  $\mu$ mol, 75%).  $R_f$  = 0.26 (25% EtOAc in petroleum ether);  $[\alpha]_D^{32}$  -15.6 ( $c$  0.15,  $\text{CHCl}_3$ ). Enantiomeric excess (90% ee) was determined by HPLC analysis (25  $^\circ\text{C}$ ). [Chiralpak OD-H column 2-propanol/hexane = 10/90; flow rate = 1.0 mL/min; detection wavelength = 254 nm]  $t_R$  15.0 min;  $t_R$  21.1 min; IR (film) 3034, 2924, 1720, 1236, 1162  $\text{cm}^{-1}$ ;  $\delta H$  (500 MHz;  $\text{CDCl}_3$ ) 7.83 (2H, d,  $J$  8.2, Ar-H), 7.55 (1H, t,  $J$  7.5, Ar-H), 7.30-7.26 (7H, m, Ar-H), 7.19 (1H, s, Ar-H), 7.10 (1H, t,  $J$  7.5, Ar-H), 6.96 (1H, t,  $J$  10.0, Ar-H), 5.20-5.04 (3H, m,  $\text{CH}_2\text{Ph}$  and  $\text{NCHPh}$ ), 4.14 (1H, t,  $J$  8.7,  $\text{NCHH}$ ), 3.90 (1H, dd,  $J$  8.4, 6.0,  $\text{NCHH}$ ), 2.40 (3H, s,  $\text{CH}_3$ );  $\delta C$  (125 MHz;  $\text{CDCl}_3$ ) 160.1 (C=O), 159.7 (d,  $J$  246.3, Ar-CF), 145.5 (Ar-C), 135.4 (Ar-C), 130.4 (d,  $J$  8.8, Ar-CH), 130.1 (Ar-CH), 130.0 (Ar-C), 129.7 (Ar-CH), 128.5 (Ar-CH), 128.5 (d,  $J$  3.8, Ar-CH), 129.7 (Ar-CH), 128.3 (Ar-CH), 127.9 (Ar-CH), 124.7 (d,  $J$  13.8, Ar-C), 124.7 (d,  $J$  2.5, Ar-CH), 115.5 (d,  $J$  20.0, Ar-CH), 68.4 ( $\text{CH}_2$ ), 57.1 (d,  $J$  3.8, CH), 56.1 (d,  $J$  2.5,  $\text{CH}_2$ ), 21.8 ( $\text{CH}_3$ );  $\delta F$  (376 MHz;  $\text{CDCl}_3$ ) -118.4 (CF); HRMS (ESI $^+$ ) calculated for  $\text{C}_{23}\text{H}_{21}\text{FN}_2\text{O}_4\text{S}$   $[\text{M}+\text{Na}]^+$  463.1098; found 463.1097.

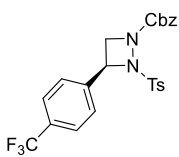

**Benzyl (S)-2-tosyl-3-(4-(trifluoromethyl)phenyl)-1,2-diazetidene-1-carboxylate (8d).** Following general method 4, **6d** (60 mg, 0.12 mmol, 1.0 equiv), triphenylphosphine (77 mg, 0.29 mmol, 2.5 equiv), diethyl azodicarboxylate (63  $\mu$ L, 0.29 mmol, 2.5 equiv) and tetrahydrofuran (12 mL,

0.01 M) yielded **8d** as a white solid (48 mg, 0.10 mmol, 82%). M.p. 117-119  $^\circ\text{C}$ ;  $R_f$  = 0.21 (25% EtOAc in petroleum ether);  $[\alpha]_D^{32}$  +18.9 ( $c$  2.86,  $\text{CHCl}_3$ ). Enantiomeric excess (94% ee) was determined by HPLC analysis (25  $^\circ\text{C}$ ). [Chiralpak OD-H column 2-propanol/hexane = 10/90; flow rate = 1.0 mL/min; detection wavelength = 254 nm]  $t_R$  19.5 min;  $t_R$  24.3 min; IR (film) 2925, 1750, 1693, 1360, 1151, 1087  $\text{cm}^{-1}$ ;  $\delta H$  (500 MHz;  $\text{d}_6$ -DMSO) 7.89 (2H, d,  $J$  8.2, Ar-H), 7.79 (2H, d,  $J$  8.2, Ar-H), 7.65 (2H, d,  $J$  8.1, Ar-H), 7.54 (2H, d,  $J$  8.1, Ar-H), 7.39-7.32 (5H, m, Ar-H), 5.38-5.09 (3H, m,  $\text{CHOH}$  and  $\text{CH}_2\text{Ph}$ ), 4.09 (1H, t,  $J$  8.9,  $\text{NCHH}$ ), 3.93 (1H, dd,  $J$  8.9, 5.8,  $\text{NCHH}$ ), 2.46 (3H, s,  $\text{CH}_3$ );  $\delta C$  (125 MHz;  $\text{d}_6$ -DMSO) 159.5 (C=O), 145.6 (Ar-C), 135.6 (Ar-C), 130.1 (Ar-CH), 129.8 (Ar-CH), 129.2 (Ar-C), 129.0 (q,  $J$  31.9, Ar-C), 128.4 (Ar-CH), 128.2 (Ar-CH), 127.7 (Ar-CH), 127.4 (Ar-CH), 125.6 (q,  $J$  3.8, Ar-CH), 124.1 (q,  $J$  272.2,  $\text{CF}_3$ ), 67.8 ( $\text{CH}_2$ ), 60.1 (CH), 56.1 ( $\text{CH}_2$ ), 21.3 ( $\text{CH}_3$ ), 1 Ar-C not seen;  $\delta F$  (376 MHz;  $\text{d}_6$ -DMSO) -61.1 ( $\text{CF}_3$ ); HRMS (ESI $^+$ ) calculated for  $\text{C}_{24}\text{H}_{21}\text{F}_3\text{N}_2\text{O}_4\text{S}$   $[\text{M}+\text{Na}]^+$  513.1066; found 513.1061.

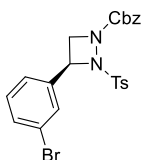

**Benzyl (S)-3-(3-bromophenyl)-2-tosyl-1,2-diazetidene-1-carboxylate (8e).** Following general method 4, **6e** (61 mg, 0.12 mmol, 1.0 equiv),

triphenylphosphine (77 mg, 0.29 mmol, 2.5 equiv), diethyl azodicarboxylate (63  $\mu$ L, 0.29 mmol, 2.5 equiv) and tetrahydrofuran (12 mL, 0.01 M) yielded **8e** as a colourless oil (47 mg, 90  $\mu$ mol, 79%).  $R_f$  = 0.25 (25% EtOAc in petroleum ether);  $[\alpha]^{32}_D$  +34.8 ( $c$  0.38,  $\text{CHCl}_3$ ). Enantiomeric excess (97% ee) was determined by HPLC analysis (25  $^\circ\text{C}$ ). [Chiralpak OD-H column 2-propanol/hexane = 9/91; flow rate = 1.0 mL/min; detection wavelength = 254 nm]  $t_R$  19.6 min;  $t_R$  25.1 min; IR (film) 2923, 1718, 1302, 1212  $\text{cm}^{-1}$ ;  $\delta H$  (500 MHz;  $\text{CDCl}_3$ ) 7.87 (2H, d,  $J$  8.2, Ar-H), 7.50 (1H, s, Ar-H), 7.38-7.29 (8H, m, Ar-H), 7.23 (1H, t,  $J$  7.8, Ar-H), 5.19 (1H, d,  $J$  12.3  $\text{CHHAr}$ ), 5.11 (1H, d,  $J$  12.3,  $\text{CHHAr}$ ), 5.07 (1H, dd,  $J$  8.7, 6.0,  $\text{NCHAr}$ ), 4.23 (1H, t,  $J$  8.7,  $\text{NCHH}$ ), 3.97 (1H, dd,  $J$  8.7, 6.0,  $\text{NCHH}$ ), 2.46 (3H, s,  $\text{CH}_3$ );  $\delta C$  (125 MHz;  $\text{CDCl}_3$ ) 160.1 (C=O) 145.5 (Ar-C), 139.5 (Ar-C), 135.3 (Ar-C), 131.9 (Ar-CH), 130.6 (Ar-CH), 131.0 (Ar-CH), 130.3 (Ar-C) 130.0 (Ar-CH), 129.7 (Ar-CH), 129.4 (Ar-CH), 128.6 (Ar-CH), 128.4 (Ar-CH), 127.9 (Ar-CH), 68.5 ( $\text{CH}_2$ ), 60.5 (CH), 56.2 ( $\text{CH}_2$ ), 21.8 ( $\text{CH}_3$ ), 1 Ar-C and 1 Ar-CH not seen; HRMS ( $\text{ESI}^+$ ) calculated for  $\text{C}_{23}\text{H}_{21}^{79}\text{BrN}_2\text{O}_4\text{S}$   $[\text{M}+\text{Na}]^+$  523.0298; found 523.0294.

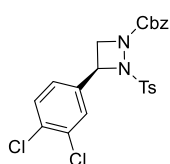

**Benzyl (S)-3-(3,4-dichlorophenyl)-2-tosyl-1,2-diazetidene-1-carboxylate**

**(8f).** Following general method 4, **6f** (100 mg, 0.20 mmol, 1.0 equiv), triphenylphosphine (129 mg, 0.49 mmol, 2.5 equiv), diethyl azodicarboxylate (76  $\mu$ L, 0.49 mmol, 2.5 equiv) and tetrahydrofuran (20 mL, 0.01 M) yielded **8f**

as a white solid (75 mg, 0.15 mmol, 78%). M.p. 133-135  $^\circ\text{C}$ ;  $R_f$  = 0.23 (25% EtOAc in petroleum ether);  $[\alpha]^{32}_D$  +33.2 ( $c$  4.40,  $\text{CHCl}_3$ ); Enantiomeric excess (90% ee) was determined by HPLC analysis (25  $^\circ\text{C}$ ). [Chiralpak OD-H column 2-propanol/hexane = 10/90; flow rate = 1.0 mL/min; detection wavelength = 254 nm]  $t_R$  25.0 min;  $t_R$  33.1 min; IR (film) 2983, 1711, 1337, 1313, 1212  $\text{cm}^{-1}$ ;  $\delta H$  (500 MHz;  $\text{CDCl}_3$ ) 7.86 (2H, d,  $J$  7.6, Ar-H), 7.50-7.27 (8H, m, Ar-H), 7.19 (2H, d,  $J$  8.5, Ar-H), 5.25-4.98 (3H, m,  $\text{CHAr}$  and  $\text{CH}_2\text{Ph}$ ), 4.25 (1H, t,  $J$  8.9,  $\text{NCHH}$ ), 3.94 (1H, t,  $J$  8.9,  $\text{NCHH}$ ), 2.43 (3H, s,  $\text{CH}_3$ );  $\delta C$  (125 MHz;  $\text{CDCl}_3$ ) 160.1 (C=O), 145.6 (Ar-C), 137.4 (Ar-C), 135.2 (Ar-C), 133.2 (Ar-C) 133.0 (Ar-C), 131.0 (Ar-CH), 130.2 (Ar-C) 130.0 (Ar-CH), 129.7 (Ar-CH), 128.6 (Ar-CH), 128.5 (Ar-CH), 128.4 (Ar-CH), 128.0 (Ar-CH), 125.6 (Ar-CH), 68.6 ( $\text{CH}_2$ ), 60.0 (CH), 56.1 ( $\text{CH}_2$ ), 21.8 ( $\text{CH}_3$ ); HRMS ( $\text{ESI}^+$ ) calculated for  $\text{C}_{23}\text{H}_{20}^{35}\text{Cl}_2\text{N}_2\text{O}_5\text{S}$   $[\text{M}+\text{Na}]^+$  513.0413; found 513.0413.

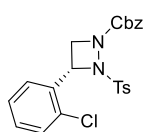

**Benzyl (R)-3-(2-chlorophenyl)-2-tosyl-1,2-diazetidene-1-carboxylate (8g).**

Following general method 4, **6g** (81 mg, 0.17 mmol, 1.0 equiv), triphenylphosphine (112 mg, 0.43 mmol, 2.5 equiv), diethyl azodicarboxylate

(66  $\mu$ L, 0.43 mmol, 2.5 equiv) and tetrahydrofuran (17 mL, 0.01 M) yielded **8g** as a colourless oil (50 mg, 0.11 mmol, 65%).  $R_f$  = 0.24 (25% EtOAc in petroleum ether);  $[\alpha]^{32}_D$  +33.2 ( $c$  0.44,  $\text{CHCl}_3$ ). Enantiomeric excess (90% ee) was determined by HPLC analysis

(25 °C). [Chiralpak OD-H column 2-propanol/hexane = 10/90; flow rate = 1.0 mL/min; detection wavelength = 254 nm]  $t_R$  13.6 min;  $t_R$  17.1 min. IR (film) 2924, 1749, 1271, 1186  $\text{cm}^{-1}$ ;  $\delta H$  (500 MHz;  $\text{CDCl}_3$ ) 7.92 (2H, d,  $J$  8.2, Ar-H), 7.83 (1H, d,  $J$  7.0, Ar-H), 7.37-7.27 (9H, m, Ar-H), 5.25 (1H, dd,  $J$  8.6, 5.9, CHAr), 5.21 (1H, d,  $J$  12.4, CHHPh), 5.11 (1H, d,  $J$  12.4, CHHPh), 4.25 (1H, t,  $J$  8.7, NCHH), 3.83 (1H, dd,  $J$  8.6, 5.8, NCHH), 2.48 (3H, s,  $\text{CH}_3$ );  $\delta C$  (125 MHz;  $\text{CDCl}_3$ ) 160.2 (C=O) 145.6 (Ar-C), 135.4 (Ar-C), 135.3 (Ar-C), 131.0 (Ar-C) 130.1 (Ar-CH), 130.0 (Ar-C), 129.8 (Ar-CH), 129.6 (Ar-CH), 129.2 (Ar-CH), 128.5 (Ar-CH), 128.4 (Ar-CH), 127.9 (Ar-CH), 127.8 (Ar-CH), 127.5 (Ar-CH), 68.4 ( $\text{CH}_2$ ), 59.8 (CH), 56.5 ( $\text{CH}_2$ ), 21.8 ( $\text{CH}_3$ ); HRMS (ESI<sup>+</sup>) calculated for  $\text{C}_{23}\text{H}_{21}^{35}\text{ClN}_2\text{O}_4\text{S}$   $[\text{M}+\text{Na}]^+$  479.0803; found 479.0805.

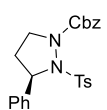

**Benzyl (R)-3-phenyl-2-tosylpyrazolidine-1-carboxylate (8h).** Following general method 4, **6h** (60 mg, 0.13 mmol, 1.0 equiv), triphenylphosphine (52 mg, 0.20 mmol, 1.5 equiv), diethylazodicarboxylate (31  $\mu\text{L}$ , 0.20 mmol, 1.5 equiv) and tetrahydrofuran (13 mL, 0.01 M) yielded **8h** as a white solid (51 mg, 0.12 mmol, 90%). M.p. 105-106 °C;  $R_f$  = 0.24 (25% EtOAc in petroleum ether);  $[\alpha]_D^{32} +52.1$  (c 0.02,  $\text{CHCl}_3$ ). Enantiomeric excess (96% ee) was determined by HPLC analysis (25 °C). [Chiralpak IA column 2-propanol/hexane = 10/90; flow rate = 1.0 mL/min; detection wavelength = 254 nm]  $t_R$  13.0 min;  $t_R$  14.1 min. IR (film) 3034, 2959, 2925, 1702, 1344, 1216, 1181  $\text{cm}^{-1}$ ;  $\delta H$  (500 MHz;  $\text{CDCl}_3$ ) 7.84 (2H, d,  $J$  8.2, Ar-CH), 7.37-7.31 (5H, m, Ar-H), 7.28-7.22 (5H, m, Ar-H), 7.21-7.18 (2H, m, Ar-H), 5.37 (1H, dd,  $J$  8.0, 4.7, CHPh), 5.09 (1H, d,  $J$  12.2,  $\text{CO}_2\text{CHHPh}$ ), 4.82 (1H, d,  $J$  12.2,  $\text{CO}_2\text{CHHPh}$ ), 3.98 (1H, ddd,  $J$  11.0, 8.4, 5.7, NCHH), 3.29 (1H, dt,  $J$  10.8, 8.3, NCHH), 2.45-2.39 (4H, m,  $\text{CH}_3$  and CHPhCHH), 2.17 (1H, dtd,  $J$  12.7, 7.2, 5.1, CHPhCHH);  $\delta C$  (125 MHz;  $\text{CDCl}_3$ ) 157.3 (C=O), 144.8 (Ar-C), 139.9 (Ar-C) 135.6 (Ar-C), 133.2 (Ar-C), 129.6 (Ar-CH), 129.4 (Ar-CH), 128.6 (Ar-CH), 128.4 (Ar-CH), 128.2 (Ar-CH), 128.0 (Ar-CH), 127.6 (Ar-CH), 126.2 (Ar-CH), 68.2 ( $\text{CH}_2$ ), 63.4 (CH), 47.8 ( $\text{CH}_2$ ), 33.8 ( $\text{CH}_2$ ), 21.7 ( $\text{CH}_3$ ); HRMS (ESI<sup>+</sup>) calculated for  $\text{C}_{24}\text{H}_{24}\text{N}_2\text{O}_4\text{S}$   $[\text{M}+\text{Na}]^+$  459.1349; found 459.1349.

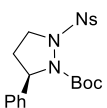

**tert-Butyl (R)-5-(thiophen-2-yl)-2-tosylpyrazolidine-1-carboxylate (8i).** Following general method 4, **6i** (42 mg, 0.09 mmol, 1.0 equiv), triphenylphosphine (37 mg, 0.14 mmol, 1.5 equiv), diethylazodicarboxylate (22  $\mu\text{L}$ , 0.14 mmol, 1.5 equiv) and tetrahydrofuran (9 mL, 0.01 M) yielded **8i** as a colourless oil (36 mg, 0.08 mmol, 85%).  $R_f$  = 0.18 (25% EtOAc in petroleum ether);  $[\alpha]_D^{32} +7.8$  (c 0.17,  $\text{CHCl}_3$ ). Enantiomeric excess (99% ee) was determined by HPLC analysis (25 °C). [Chiralpak IA column 2-propanol/hexane = 10/90; flow rate = 1.0 mL/min; detection wavelength = 254 nm]  $t_R$  25.6 min;  $t_R$  28.9 min. IR (film) 2979, 2931, 1712, 1530, 1346, 1161  $\text{cm}^{-1}$ ;  $\delta H$  (500 MHz;  $\text{CDCl}_3$ ) 8.27 (2H, d,  $J$  8.6, Ar-H), 8.18 (2H, t,  $J$  8.7, Ar-H) 7.43 (2H, d,  $J$  6.9, Ar-H), 7.36 (2H, t,  $J$  7.4, Ar-H), 7.31 (1H, d,  $J$  7.1, Ar-H), 5.04 (1H, t,  $J$  8.6, CHPh), 4.21 (1H, br s, NCHH), 3.42 (1H,

br s, NCHH), 2.59 (2H, dt,  $J$  12.9, 6.5, CHPhCHH), 2.31 (1H, p,  $J$  11.5, CHPhCHH), 1.27 (9H, s, C(CH<sub>3</sub>)<sub>3</sub>);  $\delta$ C (125 MHz; CDCl<sub>3</sub>) 155.8 (C=O seen on HMBC), 142.9 (Ar-C), 130.7 (Ar-CH), 128.4 (Ar-CH), 127.5 (Ar-CH), 126.6 (Ar-CH), 123.7 (Ar-CH), 114.1 (Ar-C), 82.7 (C), 65.4 (CH), 49.3 (CH<sub>2</sub>), 36.1 (CH<sub>2</sub>), 27.9 (CH<sub>3</sub>), 1 Ar-C not seen; HRMS (ESI<sup>+</sup>) calculated for C<sub>20</sub>H<sub>23</sub>N<sub>3</sub>O<sub>6</sub> [M+Na]<sup>+</sup> 456.1200; found 456.1198.

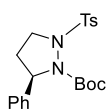

**tert-Butyl (R)-5-phenyl-2-tosylpyrazolidine-1-carboxylate (8j).** Following general method 4, **6j** (72 mg, 0.17 mmol, 1.0 equiv), triphenylphosphine (112 mg, 0.43 mmol, 2.5 equiv), diethyl azodicarboxylate (74 mg, 0.43 mmol, 2.5 equiv) in tetrahydrofuran (17 mL, 0.01 M) yielded **8j** as a colourless oil (62 mg, 0.15 mmol, 90%).  $R_f$  = 0.30 (30% EtOAc in petroleum ether);  $[\alpha]_D^{25} +23.5$  (c 0.70, CHCl<sub>3</sub>). Enantiomeric excess (95% ee) was determined by HPLC analysis (25 °C). [Chiralpak IA column 2-propanol/hexane = 5/95; flow rate = 1.0 mL/min; detection wavelength = 254 nm]  $t_R$  10.9 min;  $t_R$  17.4 min. IR (film) 2987, 2900, 1706, 1405, 1075 cm<sup>-1</sup>;  $\delta$ H (500 MHz; CDCl<sub>3</sub>) 7.86-7.85 (2H, m, Ar-H), 7.45-7.25 (7H, m, Ar-H), 4.99 (1H, dd,  $J$  8.7, 6.2, CHPh), 4.10 (1H, br s, NCHH), 3.29 (1H, br s, NCHH), 2.48-2.26 (5H, m, CH<sub>2</sub>, CH<sub>3</sub>), 1.25 (9H, s, (CH<sub>3</sub>)<sub>3</sub>);  $\delta$ C (125 MHz; CDCl<sub>3</sub>) 156.6 (C=O), 144.7 (Ar-C), 141.5 (Ar-C), 133.8 (Ar-C), 129.6 (Ar-CH), 129.5 (Ar-CH), 128.4 (Ar-CH), 127.2 (Ar-CH), 126.8 (Ar-CH), 82.0 (C), 65.6 (CH), 49.3 (CH<sub>2</sub>), 36.1 (CH<sub>2</sub>), 27.9 (CH<sub>3</sub>), 21.7 (CH<sub>3</sub>); HRMS (ESI<sup>+</sup>) calculated for C<sub>21</sub>H<sub>26</sub>N<sub>2</sub>NaO<sub>4</sub>S [M+Na]<sup>+</sup> 425.1505; found 425.1504.

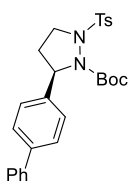

**tert-Butyl (R)-5-([1,1'-biphenyl]-4-yl)-2-tosylpyrazolidine-1-carboxylate (8k).** Following general method 4, **6k** (84 mg, 0.17 mmol, 1.0 equiv), triphenylphosphine (66 mg, 0.25 mmol, 1.5 equiv), diethyl azodicarboxylate (39  $\mu$ L, 0.25 mmol, 1.0 equiv) and tetrahydrofuran (17 mL, 0.01 M) yielded **8k** as a white solid (70 mg, 0.15 mmol, 86%). M.p. 109-111 °C;  $R_f$  = 0.24 (25% EtOAc in petroleum ether);  $[\alpha]_D^{25} +75.0$  (c 0.03, CHCl<sub>3</sub>). Enantiomeric excess (90% ee) was determined by HPLC analysis (25 °C). [Chiralpak IA column 2-propanol/hexane = 10/90; flow rate = 1.0 mL/min; detection wavelength = 254 nm]  $t_R$  9.5 min;  $t_R$  10.5 min. IR (film) 2980, 2924, 1701, 1393, 1357, 1255 cm<sup>-1</sup>;  $\delta$ H (500 MHz; CDCl<sub>3</sub>) 7.90 (2H, d,  $J$  8.2, Ar-H), 7.63 (4H, t,  $J$  7.5, Ar-H), 7.60 (2H, d,  $J$  7.9, Ar-H), 7.56 (2H, s, Ar-H), 7.47 (2H, t,  $J$  7.6, Ar-H), 7.37 (1H, t,  $J$  7.4, Ar-H), 7.27 (1H, d,  $J$  9.4, Ar-H), 5.07 (1H, t,  $J$  8.8, CHAr), 4.17 (1H, br s, NCHH), 3.33 (1H, br s, NCHH), 2.58-2.49 (1H, m, CHArCHH), 2.46-2.35 (4H, m, CH<sub>3</sub> and CHNCHH), 1.30 (9H, s, C(CH<sub>3</sub>)<sub>3</sub>);  $\delta$ C (125 MHz; CDCl<sub>3</sub>) 156.8 (C=O seen on HMBC), 150.5 (Ar-C), 144.6 (Ar-C), 140.9 (Ar-C), 140.1 (Ar-C), 133.8 (Ar-C), 129.6 (Ar-CH), 129.4 (Ar-CH), 128.8 (Ar-CH), 127.2 (Ar-CH), 127.1 (Ar-CH), 82.1 (C), 65.3 (CH), 49.3 (CH<sub>2</sub>), 36.0 (CH<sub>2</sub>), 27.9 (CH<sub>3</sub>), 21.6 (CH<sub>3</sub>),

2 Ar-CH not seen; HRMS (ESI<sup>+</sup>) calculated for C<sub>27</sub>H<sub>30</sub>N<sub>2</sub>O<sub>4</sub>S [M+Na]<sup>+</sup> 501.1818; found 501.1819.

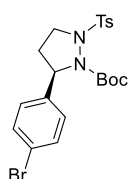

**tert-Butyl (R)-5-(4-bromophenyl)-2-tosylpyrazolidine-1-carboxylate (8l).**

Following general method 4, **6l** (61 mg, 0.12 mmol, 1.0 equiv), triphenylphosphine (47 mg, 0.18 mmol, 1.5 equiv), diethyl azodicarboxylate (28  $\mu$ L, 0.18 mmol, 1.5 equiv) and tetrahydrofuran (12 mL, 0.01 M) yielded **8l** as a colourless oil (52 mg, 0.11 mmol, 90%).  $R_f$  = 0.22 (25% EtOAc in petroleum ether);  $[\alpha]^{32}_D$  +34.6 ( $c$  0.25, CHCl<sub>3</sub>). Enantiomeric excess (90% ee) was determined by HPLC analysis (25 °C). [Chiralpak OD-H column 2-propanol/hexane = 5/95; flow rate = 1.0 mL/min; detection wavelength = 254 nm]  $t_R$  12.5 min;  $t_R$  15.5 min. IR (film) 2979, 2928, 1705, 1366, 1133 cm<sup>-1</sup>;  $\delta H$  (500 MHz; CDCl<sub>3</sub>) 7.77 (2H, d,  $J$  8.1, Ar-H), 7.39 (2H, d,  $J$  8.4, Ar-H), 7.30 (2H, s, Ar-H), 7.19 (2H, d,  $J$  7.8, Ar-H), 4.88 (1H, t,  $J$  9.8 CHAr), 4.07 (1H, br s, NCHH), 3.20 (1H, br s, NCHH), 2.43 (1H, sex,  $J$  6.9, CHArCHH), 2.46 (3H, s, CH<sub>3</sub>), 2.05-1.82 (1H, m, CHArCHH), 1.19 (9H, s, C(CH<sub>3</sub>)<sub>3</sub>);  $\delta C$  (125 MHz; CDCl<sub>3</sub>) 156.3 (C=O, seen on HMBC), 144.8 (Ar-C), 140.4 (Ar-C), 133.6 (Ar-C), 131.4 (Ar-CH), 129.6 (Ar-CH), 129.4 (Ar-CH), 128.6 (Ar-CH), 121.1 (Ar-C), 82.2 (C), 65.0 (CH), 49.3 (CH<sub>2</sub>), 36.0 (CH<sub>2</sub>), 27.9 (CH<sub>3</sub>), 21.7 (CH<sub>3</sub>); HRMS (ESI<sup>+</sup>) calculated for C<sub>21</sub>H<sub>25</sub><sup>79</sup>BrN<sub>2</sub>O<sub>4</sub>S [M+Na]<sup>+</sup> 503.0611; found 503.0612.

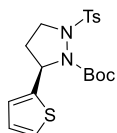

**tert-Butyl (R)-5-(thiophen-2-yl)-2-tosylpyrazolidine-1-carboxylate (8m).**

Following general method 4, **6m** (41 mg, 0.10 mmol, 1.0 equiv), triphenylphosphine (39 mg, 0.15 mmol, 1.5 equiv), diethylazodicarboxylate (24  $\mu$ L, 0.15 mmol, 1.5 equiv) and tetrahydrofuran (10 mL, 0.01 M) yielded **8m** as a colourless oil (28 mg, 0.07 mmol, 72%).  $R_f$  = 0.26 (25% EtOAc in petroleum ether);  $[\alpha]^{32}_D$  +31.3 ( $c$  0.07, CHCl<sub>3</sub>). Enantiomeric excess (73% ee) was determined by HPLC analysis (25 °C). [Chiralpak IA column 2-propanol/hexane = 3/97; flow rate = 1.0 mL/min; detection wavelength = 254 nm]  $t_R$  18.5 min;  $t_R$  19.5 min. IR (film) 2978, 2925, 1704, 1256, 1133 cm<sup>-1</sup>;  $\delta H$  (500 MHz; CDCl<sub>3</sub>) 7.79 (2H, d,  $J$  7.9, Ar-H), 7.25 (1H, d,  $J$  5.1, Ar-H), 7.23 (2H, d,  $J$  7.9, Ar-H), 6.99 (1H, s, Ar-H), 6.94 (1H, t,  $J$  3.7, Ar-H), 5.29 (1H, t,  $J$  8.7, CHAr), 4.27 (1H, br s, NCHH), 3.32 (1H, br s, NCHH), 2.64-2.44 (2H, m, CHArCH<sub>2</sub>), 2.42 (3H, s, CH<sub>3</sub>), 1.32 (9H, s, C(CH<sub>3</sub>)<sub>3</sub>);  $\delta C$  (125 MHz; CDCl<sub>3</sub>) 156.3 (C=O seen on HMBC), 144.6 (Ar-C), 133.3 (Ar-C), 129.7 (Ar-CH), 129.3 (Ar-CH), 126.2 (Ar-CH), 125.1 (Ar-CH), 124.9 (Ar-CH), 82.3 (C), 60.7 (CH), 49.2 (CH<sub>2</sub>), 35.5 (CH<sub>2</sub>), 27.9 (CH<sub>3</sub>), 21.6 (CH<sub>3</sub>), 1 Ar-C not seen; HRMS (ESI<sup>+</sup>) calculated for C<sub>19</sub>H<sub>24</sub>N<sub>2</sub>O<sub>4</sub>S<sub>2</sub> [M+Na]<sup>+</sup> 431.1070; found 431.1073.

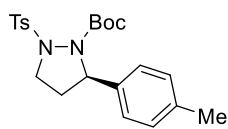

**tert-Butyl (R)-5-(p-tolyl)-2-tosylpyrazolidine-1-carboxylate ((R)-8n).**

Following general method 4, (*S*)-**6n** (217 mg, 0.50 mmol, 1.0 equiv), triphenylphosphine (328 mg, 1.25 mmol, 2.5 equiv), diethyl azodicarboxylate (DEAD) (197  $\mu$ L, 1.25 mmol, 2.5 equiv) and tetrahydrofuran (50 mL, 0.01 M) yielded (*R*)-**8n** after purification by column chromatography (20-33% EtOAc/petroleum ether) as a colourless gum (190 mg, 0.46 mmol, 91%). Alternatively replacing DEAD with diisopropyl azodicarboxylate (DIAD) in general method 4, (*R*)-**8n** was obtained as a colourless gum (249 mg, 0.60 mmol, 91%). M.p. 103-106 °C;  $R_f$  = 0.35 (33% EtOAc in petroleum ether);  $[\alpha]^{23}_D$  -26.8 (c 0.59, CHCl<sub>3</sub>). Enantiomeric excess for reaction with DEAD (93% ee) and reaction with DIAD (95% ee) was determined by HPLC analysis (25 °C). [Chiralpak IA column 2-propanol/hexane = 5/95; flow rate = 1.0 mL/min; detection wavelength = 254 nm]  $t_R$  12.2 min;  $t_R$  16.3 min; IR (neat) 2979, 2928, 1705, 1330, 1159, 1133, 1088, 814, 761 cm<sup>-1</sup>;  $\delta H$  (300 MHz; CDCl<sub>3</sub>) 7.88 (2H, d,  $J$  8.1, Ar-*H*), 7.37 (2H, d,  $J$  6.5, Ar-*H*), 7.27 (2H, d,  $J$  9.0, Ar-*H*), 7.16 (2H, d,  $J$  7.8, Ar-*H*), 4.98 (1H, t,  $J$  8.7, NCH), 4.13 (1H, br m, NCHH), 3.31 (1H, br m, NCHH), 2.53-2.44 (1H, m, CHHCHN), 2.42 (3H, s, CH<sub>3</sub>), 2.37 (3H, s, CH<sub>3</sub>), 2.35-2.26 (1H, m, CHHCHN), 1.27 (9H, s, (CH<sub>3</sub>)<sub>3</sub>);  $\delta C$  (101 MHz; CDCl<sub>3</sub>) 144.7 (Ar-C), 138.4 (Ar-C, seen on HMBC), 136.9 (Ar-C), 134.0 (Ar-C), 129.7 (Ar-CH), 129.5 (Ar-CH), 129.1 (Ar-CH), 126.9 (Ar-CH), 82.0 (C), 65.6 (NCH), 49.4 (NCH<sub>2</sub>), 36.2 (CH<sub>2</sub>CHN), 28.0 (Boc-CH<sub>3</sub>), 21.8 (CH<sub>3</sub>), 21.3 (CH<sub>3</sub>), Boc-C=O not observed; HRMS (ESI<sup>+</sup>) calculated for C<sub>22</sub>H<sub>28</sub>N<sub>2</sub>NaO<sub>4</sub>S [M+Na]<sup>+</sup> 439.1662; found 439.1660.

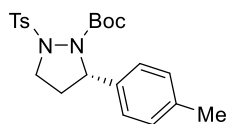

**tert-Butyl (S)-5-(p-tolyl)-2-tosylpyrazolidine-1-carboxylate ((S)-8n).**

Following general method 4, (*R*)-**6n** (306 mg, 0.70 mmol, 1.0 equiv), triphenylphosphine (462 mg, 1.76 mmol, 2.5 equiv), diisopropyl azodicarboxylate (DIAD) (347  $\mu$ L, 1.76 mmol, 2.5 equiv) and tetrahydrofuran (70 mL, 0.01 M) yielded (*S*)-**8n** after purification by column chromatography (20-33% EtOAc/petroleum ether) as a colourless gum (236 mg, 0.57 mmol, 81%).  $[\alpha]^{22}_D$  +26.0 (c 0.49, CHCl<sub>3</sub>). Enantiomeric excess (95% ee) was determined by HPLC analysis (25 °C). [Chiralpak IA column 2-propanol/hexane = 5/95; flow rate = 1.0 mL/min; detection wavelength = 254 nm]  $t_R$  12.2 min;  $t_R$  16.3 min.

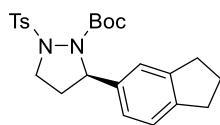

**tert-Butyl (R)-5-(2,3-dihydro-1H-inden-5-yl)-2-tosylpyrazolidine-1-carboxylate (8o).**

Following general method 4, **6o** (115 mg, 0.25 mmol, 1.0 equiv), triphenylphosphine (164 mg, 0.63 mmol, 2.5 equiv), diethyl azodicarboxylate (DEAD) (98  $\mu$ L, 0.63 mmol, 2.5 equiv) and tetrahydrofuran (25 mL, 0.01 M) yielded **8o** after purification by column chromatography (10-20% EtOAc/petroleum ether) as a colourless gum (98 mg, 0.22 mmol, 89%).  $R_f$  = 0.20 (20% EtOAc in petroleum ether);  $[\alpha]^{22}_D$

+25.1 (c 0.22, CHCl<sub>3</sub>). Enantiomeric excess (94% ee) was determined by HPLC analysis (25 °C). [Chiralpak IA column 2-propanol/hexane = 10/90; flow rate = 1.0 mL/min; detection wavelength = 254 nm] *t<sub>R</sub>* 7.9 min; *t<sub>R</sub>* 11.1 min; IR (neat) 2930, 1707, 1366, 1332, 1160, 1135, 1088, 815, 750 cm<sup>-1</sup>;  $\delta$ H (600 MHz; CDCl<sub>3</sub>) 7.87 (2H, d, *J* 8.1, Ar-*H*), 7.33-7.20 (4H, m, Ar-*H*), 7.17 (1H, d, *J* 7.6, Ar-*H*), 4.96 (1H, t, *J* 8.6, NCH), 4.11 (1H, br m, NCHH), 3.27 (1H, br m, NCHH), 2.90 (4H, t, *J* 7.8, CH<sub>2</sub>), 2.47-2.42 (m, 1H, CHHCHN), 2.41 (3H, s, CH<sub>3</sub>), 2.38-2.29 (1H, m, CHHCHN), 2.07 (2H, p, *J* 7.8, 2H, CH<sub>2</sub>CH<sub>2</sub>CH<sub>2</sub>), 1.27 (9H, s, (CH<sub>3</sub>)<sub>3</sub>);  $\delta$ C (151 MHz; CDCl<sub>3</sub>) 144.7 (Ar-C), 144.3 (Ar-C), 143.3 (Ar-C), 138.4 (Ar-C, seen on HMBC), 134.0 (Ar-C), 129.7 (Ar-CH), 129.5 (Ar-CH), 124.9 (Ar-CH, seen on HMBC), 124.3 (Ar-CH), 123.0 (Ar-CH, seen on HMBC), 81.9 (C), 65.9 (NCH), 49.5 (NCH<sub>2</sub>), 36.4 (CH<sub>2</sub>CHN), 33.0 (CH<sub>2</sub>), 32.7 (CH<sub>2</sub>), 28.0 (Boc-CH<sub>3</sub>), 25.7 (CH<sub>2</sub>CH<sub>2</sub>CH<sub>2</sub>), 21.7 (CH<sub>3</sub>), Boc-C=O not observed; HRMS (ESI<sup>+</sup>) calculated for C<sub>24</sub>H<sub>30</sub>N<sub>2</sub>NaO<sub>4</sub>S [M+Na]<sup>+</sup> 465.1818; found 465.1815.

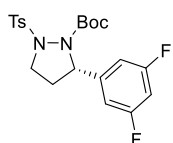

**tert-Butyl (S)-5-(3,5-difluorophenyl)-2-tosylpyrazolidine-1-carboxylate**

**(8p).** Following general procedure 5, alcohol **6p** (239 mg, 0.50 mmol, 1.0 equiv), triphenylphosphine (330 mg, 1.26 mmol, 2.5 equiv), diethylazodicarboxylate (198  $\mu$ L, 1.26 mmol, 2.5 equiv) and tetrahydrofuran

(50 mL, 0.01 M) yielded **8p** as a white solid (193 mg, 0.44 mmol, 88%). *R<sub>f</sub>* = 0.08 (15% EtOAc in petroleum ether); [ $\alpha$ ]<sub>D</sub><sup>24</sup> -16.4 (c 0.11, CHCl<sub>3</sub>); Enantiomeric excess (93% ee) was determined by HPLC analysis (15 °C). [Chiralcel OD column 2-propanol/hexane = 1/99; flow rate = 1.0 mL/min; detection wavelength = 254 nm] *t<sub>R</sub>* 34.7 min; *t<sub>R</sub>* 43.2 min. M.p. 103-104 °C; IR (film) 2974, 1721, 1680, 1155, 1113 cm<sup>-1</sup>;  $\delta$ H (500 MHz; CDCl<sub>3</sub>) 7.85 (2H, d, *J* 8.2, Ar-*H*), 7.28 (2H, d, *J* 8.1, Ar-*H*), 6.98 (2H, d, *J* 6.0, Ar-*H*), 6.70 (1H, tt, *J* 8.8, 2.2, Ar-*H*), 6.33 (1H, s, NH), 4.98 (1H, d, *J* 8.9, CHAr), 4.24-4.12 (1H, br m, CHHN), 3.33-3.21 (1H, br m, CHHN), 2.54-2.46 (1H, m, CHArCHH), 2.42 (3H, s, CH<sub>3</sub>), 2.36-2.24 (1H, br m, CHArCHH), 1.27 (9H, s, C(CH<sub>3</sub>)<sub>3</sub>);  $\delta$ C (125 MHz; CDCl<sub>3</sub>) 162.9 (dd, *J* 246.3, 12.5, Ar-CF), 145.5 (Ar-C), 145.0 (Ar-C), 133.5 (Ar-C), 129.6 (Ar-CH), 129.5 (Ar-CH), 109.6 (d, *J* 25.0, Ar-CH), 102.6 (t, *J* 25.0, Ar-CH), 82.5 (C), 64.8 (CH), 49.2 (CH<sub>2</sub>), 35.7 (CH<sub>2</sub>), 27.8 (CH<sub>3</sub>), 21.6 (CH<sub>3</sub>), C=O not seen;  $\delta$ F (376 MHz; CDCl<sub>3</sub>) -109.7 (Ar-CF); HRMS (ESI<sup>+</sup>) calculated for C<sub>21</sub>H<sub>24</sub>N<sub>2</sub>NaO<sub>4</sub>SF<sub>2</sub> [M+Na]<sup>+</sup> 461.1317; found 461.1322.

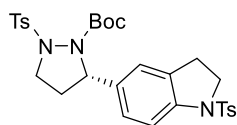

**tert-Butyl (S)-2-tosyl-5-(1-tosylindolin-5-yl)pyrazolidine-1-carboxylate ((S)-8q).**

Following general method 4, (*R*)-**6q** (308 mg, 0.50 mmol, 1.0 equiv), triphenylphosphine (328 mg, 1.25 mmol, 2.5 equiv), diethyl azodicarboxylate (DEAD) (197  $\mu$ L, 1.25 mmol, 2.5 equiv) and tetrahydrofuran (50 mL, 0.01 M) yielded (*S*)-**8q** after purification by column chromatography (33-50% EtOAc/petroleum ether) as a colourless gum (244 mg, 0.41 mmol, 82%). Alternatively

replacing DEAD with diisopropyl azodicarboxylate (DIAD) in general method 4, (S)-**8q** was obtained as a white foam (274 mg, 0.46 mmol, 92%). M.p. 148-151 °C (decomposition);  $R_f$  = 0.29 (50% EtOAc in petroleum ether);  $[\alpha]^{22}_D$  -34.3 ( $c$  0.20,  $\text{CHCl}_3$ ). Enantiomeric excess for reaction with DEAD (85% ee) and reaction with DIAD (85% ee) was determined by HPLC analysis (25 °C). [Chiralpak OD-H column 2-propanol/hexane = 10/90; flow rate = 1.0 mL/min; detection wavelength = 254 nm]  $t_R$  54.3 min;  $t_R$  59.1 min; IR (neat) 2928, 1711, 1488, 1334, 1248, 1161, 1090, 1055, 976, 815  $\text{cm}^{-1}$ ;  $\delta H$  (400 MHz;  $\text{CDCl}_3$ ) 7.83 (2H, d,  $J$  8.2, Ar-*H*), 7.69 (2H, d,  $J$  8.2, Ar-*H*), 7.56 (1H, d,  $J$  8.9, Ar-*H*), 7.26-7.19 (6H, m, Ar-*H*), 4.91 (1H, t,  $J$  8.7, NCH), 4.07 (1H, br m, NCHHCH<sub>2</sub>CH), 3.98-3.85 (2H, m, NCH<sub>2</sub>CH<sub>2</sub>C), 3.24 (1H, br m, NCHHCH<sub>2</sub>CH), 2.91 (2H, t,  $J$  8.4, NCH<sub>2</sub>CH<sub>2</sub>C), 2.47-2.41 (NCH<sub>2</sub>CHHCH), 2.41 (3H, s, CH<sub>3</sub>), 2.37 (3H, s, CH<sub>3</sub>), 2.33-2.26 (NCH<sub>2</sub>CHHCH), 1.26 (9H, s, (CH<sub>3</sub>)<sub>3</sub>);  $\delta C$  (151 MHz;  $\text{CDCl}_3$ ) 144.9 (Ar-C), 144.2 (Ar-C), 141.3 (Ar-C), 136.8 (Ar-C, seen on HMBC), 134.1 (Ar-C), 133.9 (Ar-C), 132.0 (Ar-C), 129.8 (Ar-CH), 129.7 (Ar-CH), 129.5 (Ar-CH), 127.5 (Ar-CH), 123.6 (Ar-CH, seen on HSQC), 114.5 (Ar-CH), 82.0 (C), 65.3 (NCH, seen on HSQC), 50.3 (NCH<sub>2</sub>CH<sub>2</sub>C), 49.3 (NCH<sub>2</sub>CH<sub>2</sub>CH, seen on HSQC), 36.2 (NCH<sub>2</sub>CH<sub>2</sub>CH), 28.1 (NCH<sub>2</sub>CH<sub>2</sub>C), 28.0 (Boc-CH<sub>3</sub>), 21.8 (CH<sub>3</sub>), 21.7 (CH<sub>3</sub>), one Ar-CH and Boc-C=O not observed; HRMS (ESI<sup>+</sup>) calculated for C<sub>30</sub>H<sub>35</sub>N<sub>3</sub>NaO<sub>6</sub>S<sub>2</sub> [M+Na]<sup>+</sup> 620.1859; found 620.1864.

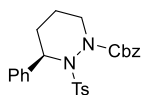

**Benzyl (R)-3-phenyl-2-tosyltetrahydropyridazine-1(2H)-carboxylate (8r).**

Following general method 4, **6r** (46 mg, 0.10 mmol, 1.0 equiv), triphenylphosphine (39 mg, 0.15 mmol, 1.5 equiv), diethylazodicarboxylate (23  $\mu\text{L}$ , 0.15 mmol, 1.5 equiv) and tetrahydrofuran (10 mL, 0.01 M) yielded **8r** as a colourless oil (29 mg, 0.06 mmol, 63%).  $R_f$  = 0.29 (25% EtOAc in petroleum ether);  $[\alpha]^{32}_D$  +43.8 ( $c$  0.04,  $\text{CHCl}_3$ ). Enantiomeric excess (94% ee) was determined by HPLC analysis (25 °C). [Chiralpak IA column 2-propanol/hexane = 1.5/98.5; flow rate = 1.0 mL/min; detection wavelength = 254 nm]  $t_R$  34.0 min;  $t_R$  36.3 min. IR (film) 2953, 2925, 1706, 1353, 1260  $\text{cm}^{-1}$ ;  $\delta H$  (500 MHz;  $\text{CDCl}_3$ ) 7.79-7.66 (2H, m, Ar-*H*), 7.60-7.31 (6H, m, Ar-*H*) 7.22-7.06 (6H, m, Ar-*H*), 5.21-5.08 (1H, m, CHPh), 4.85 (1H, d,  $J$  11.8, CO<sub>2</sub>CHH), 4.70 (1H, d,  $J$  11.9, CO<sub>2</sub>CHH), 4.28-4.02 (1H, m, NCHH), 3.71-3.44 (1H, m, NCHH), 2.43-2.31 (4H, m, CH<sub>3</sub> and CHPhCHH), 2.17-2.10 (1H, m, CHPhCHH), 1.97 (1H, br s, CH<sub>2</sub>CHHCH<sub>2</sub>), 1.78-1.71 (1H, m, CH<sub>2</sub>CHHCH<sub>2</sub>);  $\delta C$  (125 MHz;  $\text{CDCl}_3$ ) 155.9 (C=O), 144.4 (Ar-C), 138.6 (Ar-C), 135.5 (Ar-C), 134.9 (Ar-C), 132.2 (Ar-CH), 132.0 (Ar-CH), 129.4 (Ar-CH), 128.8 (Ar-CH), 128.5 (Ar-CH), 128.4 (Ar-CH), 128.2 (Ar-CH), 127.4 (Ar-CH), 68.2 (CH<sub>2</sub>), 57.4 (CH), 43.6 (CH<sub>2</sub>), 29.7 (CH<sub>2</sub>), 21.7 (CH<sub>3</sub>), 19.1 (CH<sub>2</sub>); HRMS (ESI<sup>+</sup>) calculated for C<sub>25</sub>H<sub>26</sub>N<sub>2</sub>O<sub>4</sub>S [M+Na]<sup>+</sup> 473.1505; found 473.1503.



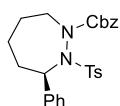

**Benzyl (R)-3-phenyl-2-tosyl-1,2-diazepane-1-carboxylate (8s).** Following general method 4, **6s** (27 mg, 56  $\mu$ mol, 1.0 equiv), triphenylphosphine (22 mg, 84  $\mu$ mol, 1.5 equiv), diethylazodicarboxylate (13  $\mu$ L, 84  $\mu$ mol, 1.5 equiv) and tetrahydrofuran (5.6 mL, 0.01 M) yielded **8s** as a colourless oil (17 mg, 38  $\mu$ mol, 67%).  $R_f$  = 0.31 (25% EtOAc in petroleum ether);  $[\alpha]^{32}_D +22.3$  (c 0.09,  $\text{CHCl}_3$ ). Enantiomeric excess (90% ee) was determined by HPLC analysis (25  $^\circ\text{C}$ ). [Chiralpak OD-H column 2-propanol/hexane = 2/98; flow rate = 1.0 mL/min; detection wavelength = 254 nm]  $t_R$  14.8 min;  $t_R$  16.8 min. IR (film) 2925, 2856, 1705, 1401, 1126  $\text{cm}^{-1}$ ;  $\delta H$  (500 MHz;  $\text{CDCl}_3$ ) 7.34-7.23 (5H, m, Ar-CH), 7.15-7.00 (6H, m, Ar-H) 6.90-6.84 (3H, m, Ar-H), 5.11-5.00 (1H, m, CHPh), 4.85 (1H, d,  $J$  11.8,  $\text{CO}_2\text{CHHPh}$ ), 4.70 (1H, d,  $J$  11.9,  $\text{CO}_2\text{CHHPh}$ ), 4.28-4.02 (1H, m, NCHH), 3.71-3.44 (1H, m, NCHH), 2.43-2.31 (4H, m,  $\text{CH}_3$  and  $\text{CHPhCHH}$ ) 2.17-2.10 (1H, m,  $\text{CHPhCHH}$ ), 1.99-1.72 (4H, br s,  $\text{CH}_2(\text{CH}_2)_2\text{CH}_2$ );  $\delta C$  (125 MHz;  $\text{CDCl}_3$ ) 156.2 (minor rotamer) and 156.1 (C=O), 143.5 (Ar-C) and 143.4 (minor rotamer), 142.6 (Ar-C) and 142.3 (minor rotamer), 136.3 (minor rotamer) and 136.2 (Ar-C), 136.1 (minor rotamer) and 135.0 (Ar-C), 129.1 (Ar-CH), 128.9 (Ar-CH), 128.7 (Ar-CH), 128.6 (Ar-CH), 128.5 (Ar-CH), 128.4 (Ar-CH), 128.3 (Ar-CH), 128.3 (Ar-CH), 128.2 (Ar-CH), 128.0 (Ar-CH), 127.9 (Ar-CH), 127.8 (Ar-CH), 127.5 (Ar-CH), 127.2 (Ar-CH), 127.0 (Ar-CH), 126.9 (Ar-CH), 68.5 (minor rotamer) and 67.0 ( $\text{CH}_2$ ), 68.4 (CH), 54.1 (minor rotamer) and 52.9 ( $\text{CH}_2$ ), 36.2 (minor rotamer) and 36.1 ( $\text{CH}_2$ ), 28.3 ( $\text{CH}_2$ ) and 28.2 (minor rotamer), 27.2 (minor rotamer) and 26.3 ( $\text{CH}_2$ ), 21.5 ( $\text{CH}_3$ ); HRMS (ESI $^+$ ) calculated for  $\text{C}_{26}\text{H}_{28}\text{N}_2\text{O}_4\text{S}$   $[\text{M}+\text{Na}]^+$  487.1662; found 487.1656.

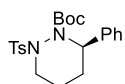

**tert-Butyl (R)-6-phenyl-2-tosyltetrahydropyridazine-1(2H)-carboxylate (8t).** Following general method 4 **6t** (3.72 g, 8.56 mmol, 1.0 equiv), triphenylphosphine (5.61 g, 21.4 mmol, 2.5 equiv), diethyl azodicarboxylate (3.37 mL, 21.4 mmol, 2.5 equiv), tetrahydrofuran (860 mL, 0.01 M) yielded **8t** as a colourless oil, which crystallised upon standing to a white solid (2.16 g, 5.19 mmol, 61%). M.p. 99-102  $^\circ\text{C}$ ;  $R_f$  = 0.24 (20% EtOAc in petroleum ether);  $[\alpha]^{28}_D -26.3$  (c 0.31,  $\text{CHCl}_3$ ). Enantiomeric excess (91% ee) was determined by HPLC analysis (25  $^\circ\text{C}$ ). [Chiralpak OD-H column 2-propanol/hexane = 2/98; flow rate = 1.0 mL/min; detection wavelength = 254 nm]  $t_R$  13.7 min;  $t_R$  15.3 min; IR (neat) 2980, 1707, 1357, 1157, 747, 659  $\text{cm}^{-1}$ ;  $\delta H$  (400 MHz;  $\text{CDCl}_3$ ) 7.45 (2H d,  $J$  7.6, Ar-H), 7.39-7.28 (5H, m, Ar-H), 7.05 (2H, d,  $J$  8.0, Ar-H), 5.21 (1H, t,  $J$  5.9, NCH), 3.66 (1H, dt,  $J$  13.1, 6.7, NCHH), 3.41 (1H, dt,  $J$  12.9, 6.4, NCHH), 2.34 (3H, s,  $\text{CH}_3$ ), 2.01-1.95 (2H, m,  $\text{CH}_2\text{CHN}$ ), 1.93-1.85 (1H, m,  $\text{CHHCH}_2\text{N}$ ), 1.55-1.48 (1H, m,  $\text{CHHCH}_2\text{N}$ ), 1.47 (9H, s,  $(\text{CH}_3)_3$ );  $\delta C$  (125 MHz;  $\text{CDCl}_3$ ) 156.9 (Boc-C=O), 143.2 (Ar-C), 140.6 (Ar-C), 136.7 (Ar-C), 129.3 (Ar-CH), 128.3 (Ar-CH), 128.1 (Ar-CH), 127.5 (Ar-CH), 127.2 (Ar-CH), 82.5 (C), 58.9 (NCH), 44.9 (NCH $_2$ ), 28.2 (Boc- $\text{CH}_3$ ), 24.9 ( $\text{CH}_2\text{CHN}$ ), 21.6 ( $\text{CH}_3$ ), 19.5 ( $\text{CH}_2\text{CH}_2\text{N}$ ); HRMS (ESI $^+$ ) calculated for  $\text{C}_{22}\text{H}_{28}\text{N}_2\text{NaO}_4\text{S}$   $[\text{M}+\text{Na}]^+$  439.1662; found 439.1657.

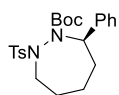

**tert-Butyl (R)-7-phenyl-2-tosyl-1,2-diazepane-1-carboxylate (8u).** Following general method 4, **6u** (2.44 g, 5.67 mmol, 1.0 equiv), triphenylphosphine (3.72 g, 14.2 mmol, 2.5 equiv), diethyl azodicarboxylate (2.24 mL, 14.2 mmol, 2.5 equiv) and tetrahydrofuran (570 mL, 0.01 M) yielded **8u** as a colourless, highly viscous oil (969 mg, 2.25 mmol, 40%).  $R_f = 0.29$  (20% EtOAc in petroleum ether); IR (neat) 2932, 1714, 1320, 1157, 1089, 957, 753, 698, 665  $\text{cm}^{-1}$ ;  $[\alpha]^{28}_{\text{D}} +1.4$  ( $c$  0.22,  $\text{CHCl}_3$ ). Enantiomeric excess (93% ee) was determined by HPLC analysis (25 °C). [Chiralpak IA column 2-propanol/hexane = 2/98; flow rate = 1.0 mL/min; detection wavelength = 254 nm]  $t_R$  11.5 min;  $t_R$  13.5 min;  $\delta H$  (400 MHz;  $\text{CDCl}_3$ ) 7.68-7.56 (4H, m, Ar-*H*), 7.36 (2H, t,  $J$  7.5, Ar-*H*), 7.31-7.28 (1H, m, Ar-*H*), 7.21 (2H, d,  $J$  8.0, Ar-*H*), 4.92 (1H, br s, NCH), 4.17 (1H, dt,  $J$  14.0, 4.1, NCHH), 3.13 (1H, ddd,  $J$  14.2, 10.7, 3.6, 1H, NCHH), 2.40 (3H, s,  $\text{CH}_3$ ), 2.24-2.15 (1H, m, CHHCHN), 2.09-2.03 (2H, m, CHHCHN, CHHCH<sub>2</sub>CH<sub>2</sub>N), 1.81-1.67 (2H, m, CH<sub>2</sub>CH<sub>2</sub>N), 1.55-1.45 (1H, m, CHHCH<sub>2</sub>CH<sub>2</sub>N), 1.26 (9H, s, ( $\text{CH}_3$ )<sub>3</sub>);  $\delta C$  (125 MHz;  $\text{CDCl}_3$ ) 155.7 (Boc-C=O), 143.3 (Ar-C), 142.6 (Ar-C), 137.2 (Ar-C), 129.3 (Ar-CH), 128.2 (Ar-CH), 128.1 (Ar-CH), 127.6 (Ar-CH), 127.1 (Ar-CH), 82.2 (C), 66.4 (NCH), 51.7 (NCH<sub>2</sub>), 31.8 (CH<sub>2</sub>CHN), 28.5 (CH<sub>2</sub>CH<sub>2</sub>N), 28.0 (Boc-CH<sub>3</sub>), 27.0 (CH<sub>2</sub>CH<sub>2</sub>CH<sub>2</sub>N), 21.6 (CH<sub>3</sub>); HRMS (ESI<sup>+</sup>) calculated for  $\text{C}_{23}\text{H}_{30}\text{N}_2\text{NaO}_4\text{S}$   $[\text{M}+\text{Na}]^+$  453.1818; found 453.1816.

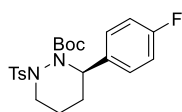

**tert-Butyl (R)-6-(4-fluorophenyl)-2-tosyltetrahydropyridazine-1(2H)-carboxylate (8v).** Following general method 4, **6v** (805 mg, 1.78 mmol, 1.0 equiv), triphenylphosphine (1.17 g, 4.45 mmol, 2.5 equiv), diethyl azodicarboxylate (701  $\mu\text{L}$ , 4.45 mmol, 2.5 equiv) and tetrahydrofuran (178 mL, 0.01 M) yielded **8v** as a colourless oil (466 mg, 1.07 mmol, 60%).  $R_f = 0.21$  (20% EtOAc in petroleum ether);  $[\alpha]^{28}_{\text{D}} -9.8$  ( $c$  0.52,  $\text{CHCl}_3$ ). Enantiomeric excess (82% ee) was determined by HPLC analysis (25 °C). [Chiralpak IA column 2-propanol/hexane = 0.8/99.2; flow rate = 1.0 mL/min; detection wavelength = 254 nm]  $t_R$  23.4 min;  $t_R$  25.8 min; IR (neat) 2977, 1707, 1510, 1351, 1222, 1154, 835, 652  $\text{cm}^{-1}$ ;  $\delta H$  (500 MHz;  $\text{CDCl}_3$ ) 7.45 (2H, d,  $J$  7.8, Ar-*H*), 7.42 (2H, dd,  $J$  8.3, 5.7, Ar-*H*), 7.10 (2H, d,  $J$  8.0, Ar-*H*), 7.00 (2H, t,  $J$  8.7, Ar-*H*), 5.15 (1H, t,  $J$  6.1, NCH), 3.71 (1H, dt,  $J$  13.0, 6.6, NCHH), 3.40 (1H, dt,  $J$  12.6, 6.2, NCHH), 2.36 (3H, s,  $\text{CH}_3$ ), 1.99-1.92 (3H, m, CH<sub>2</sub>CHN, CHHCH<sub>2</sub>N), 1.55-1.49 (1H, m, CHHCH<sub>2</sub>N), 1.45 (9H, s, ( $\text{CH}_3$ )<sub>3</sub>);  $\delta C$  (125 MHz;  $\text{CDCl}_3$ ) 162.2 (d,  $J$  245.6, CF), 156.8 (Boc-C=O), 143.5 (Ar-C), 136.7 (Ar-C), 136.5 (d,  $J$  2.8, Ar-C), 129.3 (Ar-CH), 129.2 (d,  $J$  8.0, Ar-CH), 128.1 (Ar-CH), 115.0 (d,  $J$  21.4, Ar-CH), 82.6 (C), 58.5 (NCH), 44.9 (NCH<sub>2</sub>), 28.2 (Boc-CH<sub>3</sub>), 25.1 (CH<sub>2</sub>CHN), 21.6 (CH<sub>3</sub>), 19.4 (CH<sub>2</sub>CH<sub>2</sub>N);  $\delta F$  (282 MHz;  $\text{CDCl}_3$ ) -115.9 (CF); HRMS (ESI<sup>+</sup>) calculated for  $\text{C}_{22}\text{H}_{27}\text{FN}_2\text{NaO}_4\text{S}$   $[\text{M}+\text{Na}]^+$  457.1568; found 457.1564.

### Large Scale Synthesis

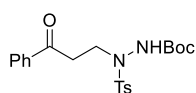

#### **tert-Butyl 2-(3-oxo-3-phenylpropyl)-2-tosylhydrazine-1-carboxylate (5j).**

*tert*-Butyl carbazate (10.0 g, 75.7 mmol, 1.0 equiv), *para*-toluenesulphonyl chloride (15.1 g, 79.4 mmol, 1.05 equiv) and tetrahydrofuran (250 mL) were cooled to 0 °C. Pyridine (30 mL, 379 mmol, 5.0 equiv) was added dropwise over 30 min, then the reaction was allowed to warm to rt and stirred for 2 h. The reaction was quenched with 2 M HCl (50 mL) mixed with ice cold water (50 mL), which was added portionwise over 10 min. This was extracted with dichloromethane (3 × 50 mL) and the combined organic extracts were dried over magnesium sulphate and concentrated *in vacuo* to give a pale yellow solid. This crude material was dissolved in acetonitrile (400 mL), then 3-chloropropiophenone (12.8 g, 75.7 mmol, 1.0 equiv) and potassium carbonate (11.0 g, 79.4 mmol, 1.05 equiv) were added. This was stirred for 18 h and then quenched with water (100 mL) and extracted with dichloromethane (3 × 100 mL). The combined organic extracts were dried over magnesium sulphate and concentrated *in vacuo* to give a pale yellow solid. This was purified by recrystallisation from an 8:1 mixture of ethyl acetate : dichloromethane (900 mL) to give **5j** as a white solid (20.7 g, 49.5 mmol, 65%). [Data on page **S8**].

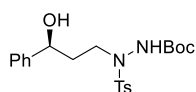

#### **tert-Butyl (S)-2-(3-hydroxy-3-phenylpropyl)-2-tosylhydrazine-1-**

**carboxylate (6j) 5j** (5.00 g, 12.0 mmol, 1.0 equiv), catalyst **7c** (37 mg, 0.06 mmol, 0.5 mol%) and formic acid : triethylamine (5 : 2) azeotrope (12.0 mL,

1M) were combined and stirred in dichloromethane (47.8 mL, 0.25 M) for 72 h. The solution was then concentrated *in vacuo* to give a red oil. This was purified by column chromatography (33% ethyl acetate in petroleum ether) to give **6j** as a white solid (5.00 g, 11.9 mmol, 99%). [Data on page **S20**].

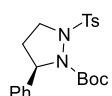

#### **tert-Butyl (R)-5-phenyl-2-tosylpyrazolidine-1-carboxylate (8j) 6j** (6.00 g, 14.3

mmol, 1.0 equiv), triphenylphosphine (6.74 g, 25.7 mmol, 1.8 equiv), diethylazodicarboxylate (4.05 mL, 25.7 mmol, 1.8 equiv) and tetrahydrofuran (143 mL, 0.1 M) were combined and stirred at rt for 24 h. The solution was then concentrated *in vacuo* to give a yellow oil. This was purified by column chromatography (20% ethyl acetate in petroleum ether) to give **8j** as a white solid (5.57 g, 13.8 mmol, 97%). [Data on page **S32**].

### Nitrogen Functionalisation: Reductive Amination

N.B. Magnesium turnings were activated by washing them with 1.0 M hydrochloric acid solution (2 x 20 mL), water (20 mL) and methanol (20 mL).

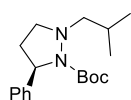

**tert-Butyl (R)-2-isobutyl-5-phenylpyrazolidine-1-carboxylate (9b).** Cyclic hydrazine **8i** (84 mg, 0.20 mmol, 1.0 equiv), activated magnesium turnings (24 mg, 1.0 mmol, 5.0 equiv) and methanol (2.0 mL, 0.1 M) were combined and stirred (800 rpm) at room temperature for 2 hours. The solution was quenched with saturated ammonium chloride solution (5 mL), then extracted with dichloromethane (3 x 5 mL). The combined organic extracts were dried over  $\text{MgSO}_4$  and concentrated *in vacuo* to give a clear oil. To this was added sodium triacetoxyborohydride (212 mg, 1.00 mmol, 5.0 equiv), isobutyraldehyde (91  $\mu\text{L}$ , 1.0 mmol, 5.0 equiv) and tetrahydrofuran (2 mL, 0.1 M). The reaction mixture was stirred at room temperature for 18 hours. The reaction mixture was quenched with 1 M NaOH (5 mL), extracted with dichloromethane (3 x 5 mL). The combined organic extracts were dried over  $\text{MgSO}_4$  and concentrated *in vacuo*. The crude product was purified by column chromatography (5-10% ethyl acetate in petroleum ether) to give **9b** as a colourless oil (39 mg, 0.13 mmol, 63%).  $R_f = 0.38$  (15% ethyl acetate in heptane).  $[\alpha]^{32}_D +35.8$  ( $c$  0.30, dichloromethane). IR (film) 2955, 2878, 1690, 1366, 1173  $\text{cm}^{-1}$ ;  $\delta H$  (400 MHz;  $\text{CDCl}_3$ ) 7.39-7.15 (5H, m, Ar-*H*), 4.97 (1H, t,  $J$  8.4, *CHPh*), 3.15 (1H, td,  $J$  11.3, 5.9, *NCHHCH*<sub>2</sub>), 3.03 (1H, ddd,  $J$  11.6, 6.6, 2.3, *NCHHCH*<sub>2</sub>), 2.71 (1H, dd,  $J$  11.5, 7.1, *NCHHCH*( $\text{CH}_3$ )<sub>2</sub>), 2.56-2.43 (2H, m, *NCHHCH*( $\text{CH}_3$ )<sub>2</sub> and *CHHCHPh*), 2.23-2.10 (1H, m, *CHHCHPh*), 1.80 (1H, nonet,  $J$  7.0, *CH*( $\text{CH}_3$ )<sub>2</sub>), 1.36 (9H, s,  $\text{C}(\text{CH}_3)_3$ ), 1.05 (3H, d,  $J$  6.6, *CHCH*<sub>3</sub>), 1.02 (3H, d,  $J$  6.6, *CHCH*<sub>3</sub>);  $\delta C$  (100 MHz;  $\text{CDCl}_3$ ) 143.8 (Ar-C), 128.3 (Ar-CH), 126.6 (Ar-CH), 125.7 (Ar-CH), 80.1 (C), 66.8 ( $\text{CH}_2$ ), 63.1 (CH), 53.3 ( $\text{CH}_2$ ), 34.9 ( $\text{CH}_2$ ), 28.3 ( $\text{CH}_3$ ), 27.5 (CH), 21.3 ( $\text{CH}_3$ ), 20.9 ( $\text{CH}_3$ ), C=O not seen; HRMS (ESI<sup>+</sup>) calculated for  $\text{C}_{18}\text{H}_{28}\text{N}_2\text{O}_2$   $[\text{M}+\text{Na}]^+$  327.2048; found 327.2052.

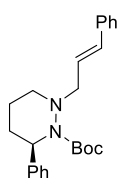

**tert-Butyl (R)-2-cinnamyl-6-phenyltetrahydropyridazine-1(2H)-carboxylate (9k).** Cyclic hydrazine **8o** (134 mg, 0.31 mmol, 1.0 equiv), activated magnesium turnings (38 mg, 1.55 mmol, 5.0 equiv) and methanol (3.1 mL, 0.1 M) were combined and stirred (800 rpm) at room temperature for 2 h. The solution was quenched with saturated ammonium chloride solution (5 mL), then extracted with dichloromethane (3 x 5 mL). The combined organic extracts were dried over  $\text{MgSO}_4$  and concentrated *in vacuo* to give a clear oil. To this was added sodium triacetoxyborohydride (323 mg, 1.52 mmol, 5.0 equiv), *E*-cinnamaldehyde (193  $\mu\text{L}$ , 1.52 mmol, 5.0 equiv) and tetrahydrofuran (3.1 mL, 0.1 M). The reaction mixture was stirred at room temperature for 18 hours. The reaction mixture was quenched with 1 M NaOH (5 mL), extracted with dichloromethane (3 x 5 mL). The combined organic extracts were dried over  $\text{MgSO}_4$  and

concentrated *in vacuo*. The crude product was purified by column chromatography (5-10% ethyl acetate in petroleum ether) to give **9k** as a colourless oil (105 mg, 0.28 mmol, 91%).  $R_f$  = 0.16 (10% ethyl acetate in heptane);  $[\alpha]^{32}_D +24.0$  (c 0.35,  $\text{CHCl}_3$ ). IR (film) 3007, 2866, 1681, 1390, 1069  $\text{cm}^{-1}$ ;  $\delta H$  (500 MHz;  $\text{CDCl}_3$ ) 7.48-7.43 (2H, m, Ar-H), 7.35 (2H, t,  $J$  7.5, Ar-H), 7.32-7.27 (5H, m, Ar-H), 7.25-7.20 (1H, m, Ar-H), 6.22 (1H, d,  $J$  15.9, C=CH), 6.09 (1H, dt,  $J$  15.8, 6.3, C=CH), 5.37 (1H, s, CHPh), 3.58 (2H, d,  $J$  7.0,  $\text{NCH}_2\text{CH}=\text{C}$ ), 3.22-3.07 (1H, m,  $\text{NCHHCH}_2$ ), 2.99-2.92 (1H, m,  $\text{NCHHCH}_2$ ), 2.42-2.21 (1H, m,  $\text{CHHCHPh}$ ), 2.09-1.95 (2H, m,  $\text{CHHCHPh}$  and  $\text{NCH}_2\text{CHH}$ ), 1.53 (10H, s,  $\text{NCH}_2\text{CHH}$  and  $\text{C}(\text{CH}_3)_3$ );  $\delta C$  (125 MHz;  $\text{CDCl}_3$ ) 142.0 (Ar-C), 137.2 (Ar-C), 131.7 (C=CH), 128.5 (Ar-CH), 128.2 (Ar-CH), 127.4 (C=CH), 127.2 (Ar-CH), 127.1 (Ar-CH), 126.6 (Ar-CH), 126.3 (Ar-CH), 80.5 (C), 57.9 ( $\text{CH}_2$ ), 55.2 (CH, seen on HSQC), 49.0 ( $\text{CH}_2$ ), 29.7 ( $\text{CH}_2$ ), 28.5 ( $\text{CH}_3$ ), 25.6 ( $\text{CH}_2$ ), 17.9 ( $\text{CH}_3$ ), C=O not seen; HRMS (ESI<sup>+</sup>) calculated for  $\text{C}_{24}\text{H}_{30}\text{N}_2\text{O}_2$   $[\text{M}+\text{Na}]^+$  401.2199; found 401.2197.

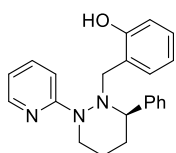

**(R)-2-((6-Phenyl-2-(pyridin-2-yl)tetrahydropyridazin-1(2H)-**

**yl)methyl)phenol (10j).** Cyclic hydrazine **9j** (53 mg, 155  $\mu\text{mol}$ , 1.0 equiv) in  $\text{HCl}/1,4\text{-dioxane}$  (4M, 2.5 mL) was stirred for 2 h at rt. The solvent was removed *in vacuo* and dichloromethane (15 mL) and saturated  $\text{NaHCO}_3$

solution (15 mL) were added. The layers were separated and the aqueous one was extracted with dichloromethane ( $2 \times 15$  mL). The combined organic layers were washed with brine, dried over  $\text{MgSO}_4$ , filtered, and concentrated *in vacuo*. The crude product was dissolved anhydrous THF (2.0 mL) and salicylaldehyde (83  $\mu\text{L}$ , 0.78 mmol, 5.0 equiv) and sodium triacetoxyborohydride (164 mg, 0.78 mmol, 5.0 equiv) were added. The reaction mixture was stirred for 24 h at rt, quenched with aqueous  $\text{NaOH}$  (1M, 4.0 mL) and extracted with dichloromethane ( $3 \times 10$  mL). The combined organic extracts were washed with brine (25 mL), dried over  $\text{MgSO}_4$ , filtered, and concentrated *in vacuo*. The residue was purified by column chromatography (20-33%  $\text{EtOAc}$ /petroleum ether) to give **10j** as a colourless, viscous oil (33 mg, 96  $\mu\text{mol}$ , 62%).  $R_f$  = 0.17 (33%  $\text{EtOAc}$  in petroleum ether);  $[\alpha]^{29}_D +61.4$  (c 0.02,  $\text{CHCl}_3$ ); IR (neat) 2926, 1591, 1466, 1437, 1348, 1258, 1159, 957, 770, 753, 693  $\text{cm}^{-1}$ ;  $\delta H$  (600 MHz;  $\text{CDCl}_3$ ; 233 K) Two conformers in a ratio of 66:34 are observed at 233 K: 8.36 (1H, d,  $J$  4.4, Ar-H), 8.16 (2H, d,  $J$  4.1, Ar-H), 7.54-7.50 (2H, m, Ar-H), 7.50-7.47 (6H, m, Ar-H), 7.42 (4H, t,  $J$  7.5, Ar-H), 7.37-7.33 (4H, m, Ar-H), 7.23 (2H, t,  $J$  7.6, Ar-H), 7.19 (1H, t,  $J$  7.7, Ar-H), 7.16-7.10 (2H, m, Ar-H), 6.92 (1H, d,  $J$  8.0, Ar-H), 6.75 (1H, t,  $J$  7.1, Ar-H), 6.70 (1H, dd,  $J$  6.6, 5.5, Ar-H), 6.63 (2H, dd,  $J$  6.3, 5.5, Ar-H), 6.57 (1H, d,  $J$  8.7, Ar-H), 4.73 (2H, d,  $J$  10.8,  $\text{NCHHCH}_2$ ), 4.34 (1H, d,  $J$  12.4,  $\text{NCHH}$ ), 4.16 (1H, br d,  $J$  2.4,  $\text{NCH}$ ), 4.12 (1H, d,  $J$  12.3,  $\text{NCHH}$ ), 3.89 (2H d,  $J$  10.4,  $\text{NCH}$ ), 3.65 (3H, br d,  $J$  10.6,  $\text{NCHHCH}_2$ , OH), 3.49 (1H, m,  $\text{NCHHCH}_2$ ), 2.96 (2H, t,  $J$  11.2,  $\text{NCHHCH}_2$ ), 2.45 (1H, ddd,  $J$  17.6, 9.2, 4.3,  $\text{CH}_2$ ), 2.24-2.08 (3H, m,  $\text{CH}_2$ ,  $\text{CH}_2$ ), 1.98-1.94 (2H, m,  $\text{CH}_2$ ), 1.94-1.68 (6H, m,  $\text{CH}_2$ ). *N.B.* Compound

decomposes in  $\text{CDCl}_3$  within several hours.  $\delta\text{C}$  (150 MHz;  $\text{CDCl}_3$ ; 233 K) Chemical shifts for the major conformer at 233 K: 159.7 (Ar-C), 158.2 (Ar-C), 147.2 (Ar-CH), 141.2 (Ar-C), 137.8 (Ar-CH), 128.6 (Ar-CH), 128.2 (Ar-CH), 127.7 (Ar-CH), 127.0 (Ar-CH), 126.8 (Ar-CH), 121.8 (Ar-C), 118.3 (Ar-CH), 116.9 (Ar-CH), 113.2 (Ar-CH), 108.5 (Ar-CH), 59.0 ( $\text{NCH}_2$ ), 50.8 (NCH), 45.1 ( $\text{NCH}_2\text{CH}_2$ ), 31.1 ( $\text{NCHCH}_2$ ), 23.6 ( $\text{NCH}_2\text{CH}_2$ ); HRMS ( $\text{ESI}^+$ ) calculated for  $\text{C}_{22}\text{H}_{24}\text{N}_3\text{O}$   $[\text{M}+\text{H}]^+$  346.1914; found 346.1917.

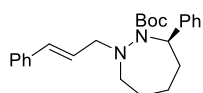

**tert-Butyl (R)-2-cinnamyl-7-phenyl-1,2-diazepane-1-carboxylate (9o).**

To a solution of cyclic hydrazine **8p** (160 mg, 0.37 mmol, 1.0 equiv) in methanol (10 mL) was added activated magnesium turnings (5.0 equiv), and the mixture was stirred vigorously for 4 h at rt. The reaction mixture was quenched with saturated ammonium chloride solution (20 mL) and extracted with dichloromethane ( $4 \times 15$  mL). The combined organic extracts were washed with brine (30 mL), dried over magnesium sulphate, filtered, and concentrated *in vacuo*. The residue was dissolved in anhydrous THF (6.0 mL) and cinnamaldehyde (233  $\mu\text{L}$ , 1.85 mmol, 5.0 equiv) and sodium triacetoxyborohydride (392 mg, 1.85 mmol, 5.0 equiv) were added. The reaction mixture was stirred for 20 h at rt, quenched with aqueous NaOH (1M, 4.0 mL) and extracted with dichloromethane ( $3 \times 10$  mL). The combined organic extracts were washed with brine (25 mL), dried over  $\text{MgSO}_4$ , filtered, and concentrated *in vacuo*. The residue was purified by column chromatography (10-20% EtOAc/petroleum ether) to give **9o** as a colourless oil (131 mg, 0.33 mmol, 90%).  $R_f$  = 0.62 (20% EtOAc in petroleum ether);  $[\alpha]_D^{27} -9.0$  (c 0.20,  $\text{CHCl}_3$ ); IR (neat) 2939, 2873, 1702, 1456, 1326, 985, 781, 706  $\text{cm}^{-1}$ ;  $\delta\text{H}$  (400 MHz;  $\text{CDCl}_3$ ) Two conformers in a 50:50 ratio are observed: 7.46 (1H, d,  $J$  7.5, Ar-*H*), 7.42 (1H, d,  $J$  7.1, Ar-*H*), 7.30-7.20 (8H, m, Ar-*H*), 6.43 (1H, d,  $J$  15.9, C=CH), 6.02-5.88 (1H, m, C=CH), 5.12 (0.5H, dd,  $J$  9.5, 6.4, NCH), 4.85 (0.5H, dd,  $J$  10.5, 5.3, NCH), 4.01 (0.5H, dd,  $J$  14.1, 7.5, CHHCH), 3.76 (0.5H, dd,  $J$  14.2, 7.5, CHHCH), 3.58 (0.5H, dd,  $J$  14.0, 4.7, CHHCH), 3.46 (0.5H, dd,  $J$  14.0, 4.3, CHHCH), 3.29-3.20 (0.5H, m, NCHH), 3.08-2.99 (0.5H, m, NCHH), 2.86-2.81 (1H, m, NCHH), 2.29-2.19 (1H, m, CHHCHN), 2.06-1.88 (2H, m, CHHCHN, CHHCH<sub>2</sub>CHN), 1.69-1.61 (2H, m, CH<sub>2</sub>CH<sub>2</sub>N), 1.57-1.52 (1H, m, CHHCH<sub>2</sub>CHN), 1.53 (4.5H, s,  $(\text{CH}_3)_3$ ), 1.47 (4.5H, s,  $(\text{CH}_3)_3$ );  $\delta\text{C}$  (125 MHz;  $\text{CDCl}_3$ ) Two conformers are observed: 156.8 (Boc-C=O), 154.7 (Boc-C=O), 143.31 (Ar-C), 143.27 (Ar-C), 137.5 (Ar-C), 137.3 (Ar-C), 131.6 (alk-CH), 131.4 (alk-CH), 128.6 (Ar-CH), 128.5 (Ar-CH), 128.3 (Ar-CH), 128.1 (Ar-CH), 128.0 (Ar-CH), 127.7 (alk-CH), 127.5 (alk-CH), 127.4 (Ar-CH), 127.3 (Ar-CH), 127.1 (Ar-CH), 127.0 (Ar-CH), 126.5 (Ar-CH), 80.5 (C), 80.4 (C), 62.2 (NCH), 60.9 ( $\text{CH}_2\text{CH}$ ), 60.5 (NCH), 59.7 ( $\text{CH}_2\text{CH}$ ), 52.2 ( $\text{NCH}_2$ ), 51.6 ( $\text{NCH}_2$ ), 33.8 ( $\text{CH}_2\text{CHN}$ ), 33.3 ( $\text{CH}_2\text{CHN}$ ), 30.7 ( $\text{CH}_2\text{CH}_2\text{N}$ ), 30.3 ( $\text{CH}_2\text{CH}_2\text{N}$ ), 29.0 (Boc- $\text{CH}_3$ ), 28.8 (Boc- $\text{CH}_3$ ), 25.6 ( $\text{CH}_2\text{CH}_2\text{CHN}$ ), 25.2 ( $\text{CH}_2\text{CH}_2\text{CHN}$ ); HRMS ( $\text{ESI}^+$ ) calculated for  $\text{C}_{25}\text{H}_{32}\text{N}_2\text{NaO}_2$   $[\text{M}+\text{Na}]^+$  415.2356; found 415.2359.

### Buchwald-Hartwig Amination Screen 1 – 96 Well Screen

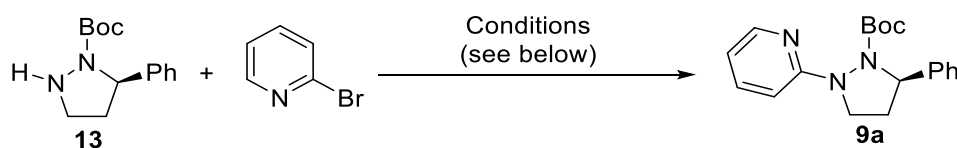

The reactions were performed in an aluminium heating block with 96 x 750  $\mu$ L vials, each with a teflon coated magnetic stirrer bar. These vials were arranged in 12 columns (labelled 1-12) and 8 rows (labelled A-H). The following powders were weighed into the vials using a Mettler Toledo QX96 powder dispenser inside a glovebox.

All vials in rows A, E: Sodium *tert*-butoxide (4.3 mg, 44  $\mu$ mol, 2.0 equiv).

All vials in rows B, F: Caesium carbonate (14.4 mg, 44  $\mu$ mol, 2.0 equiv).

All vials in rows C, G: Potassium carbonate (6.1 mg, 44  $\mu$ mol, 2.0 equiv).

All vials in rows D, H: Potassium phosphate tribasic (9.4 mg, 44  $\mu$ mol, 2.0 equiv).

All vials in column 1: [XantPhos Pd(allyl)]Cl (1.7 mg, 2.2  $\mu$ mol, 0.1 equiv).

All vials in column 2: [(*R*)-BINAP Pd(allyl)]Cl (1.9 mg, 2.2  $\mu$ mol, 0.1 equiv).

All vials in column 3: Pd(dppf)Cl<sub>2</sub> · dichloromethane (1.8 mg, 2.2  $\mu$ mol, 0.1 equiv).

All vials in column 4: [P(*t*Bu)<sub>3</sub>] Pd(crotyl) Cl (0.9 mg, 2.2  $\mu$ mol, 0.1 equiv).

All vials in column 5: JohnPhos (0.8 mg, 2.2  $\mu$ mol, 0.1 equiv) and palladium (II) acetate (0.5 mg, 2.2  $\mu$ mol, 1.0 equiv).

All vials in column 6: AdBrettPhos (1.7 mg, 2.7  $\mu$ mol, 0.12 equiv) and palladium (II) acetate (0.5 mg, 2.2  $\mu$ mol, 0.1 equiv).

All vials in column 7: [*t*BuBrettPhos Pd(allyl)]OTf (1.7 mg, 2.2  $\mu$ mol, 0.1 equiv).

All vials in column 8: MorDalPhos (1.2 mg, 2.6  $\mu$ mol, 0.12 equiv) and palladium (II) acetate (0.5 mg, 2.2  $\mu$ mol, 0.1 equiv).

All vials in column 9: [BrettPhos Pd(crotyl)]OTf (1.9 mg, 2.2  $\mu$ mol, 0.1 equiv).

All vials in column 10: [*t*BuXPhos Pd(allyl)]OTf (1.6 mg, 2.2  $\mu$ mol, 0.1 equiv).

All vials in column 11: XPhos Pd(crotyl)Cl (1.5 mg, 2.2  $\mu$ mol, 0.1 equiv).

All vials in column 12: RuPhos Pd(crotyl)Cl (1.5 mg, 2.2  $\mu$ mol, 0.1 equiv).

The following stock solutions were then made:

Stock Solution 1: *tert*-butyl (*R*)-5-phenylpyrazolidine-1-carboxylate (**13**) (286 mg, 1.15 mmol) and 2-bromopyridine (333 mg, 2.10 mmol) in toluene (4.42 mL).

Stock Solution 2: *tert*-butyl (*R*)-5-phenylpyrazolidine-1-carboxylate (**13**) (286 mg, 1.15 mmol) and 2-bromopyridine (333 mg, 2.10 mmol) in dioxane (4.42 mL).

All vials in rows A-D were dosed with 85  $\mu$ L of Stock Solution 1 which contained *tert*-butyl (*R*)-5-phenylpyrazolidine-1-carboxylate (**13**) (5.5 mg, 22  $\mu$ mol, 1.0 equiv, obtained by deprotection of **8j** using procedure in general method 5) and 2-bromopyridine (6.4 mg, 41  $\mu$ mol, 1.8 equiv).

All vials in rows E-H were dosed with 85  $\mu\text{L}$  of Stock Solution 2 which contained *tert*-butyl (*R*)-5-phenylpyrazolidine-1-carboxylate (**13**) (5.5 mg, 2.2  $\mu\text{mol}$ , 1.0 equiv) and 2-bromopyridine (6.4 mg, 41  $\mu\text{mol}$ , 1.8 equiv).

The plate was sealed with a silicone and PFA mat and placed on an HEL polyblock. The plate was then heated at 90  $^{\circ}\text{C}$  for 16 h. The vials were then cooled to rt and DMSO (300  $\mu\text{L}$ ) was added to each using a multichannel pipette. A 5  $\mu\text{L}$  aliquot was extracted from each then added to a 96-well analytical plate and diluted with DMSO (50  $\mu\text{L}$ ). The plate was analyzed by reverse phase LCMS (XBridge C<sub>18</sub> 3.5- $\mu\text{m}$  2.1  $\times$  35 mm Column, 1.6 mL min<sup>-1</sup>, 50  $^{\circ}\text{C}$ ; gradient 5:95 to 99:1 (pH 9 H<sub>2</sub>O + 10 mM NH<sub>4</sub>HCO<sub>2</sub>) / MeCN over 0.7 min + 0.3 min hold). The LCMS traces were processed using in-house software and the results visualized using Spotfire software to give **Figure S1**.

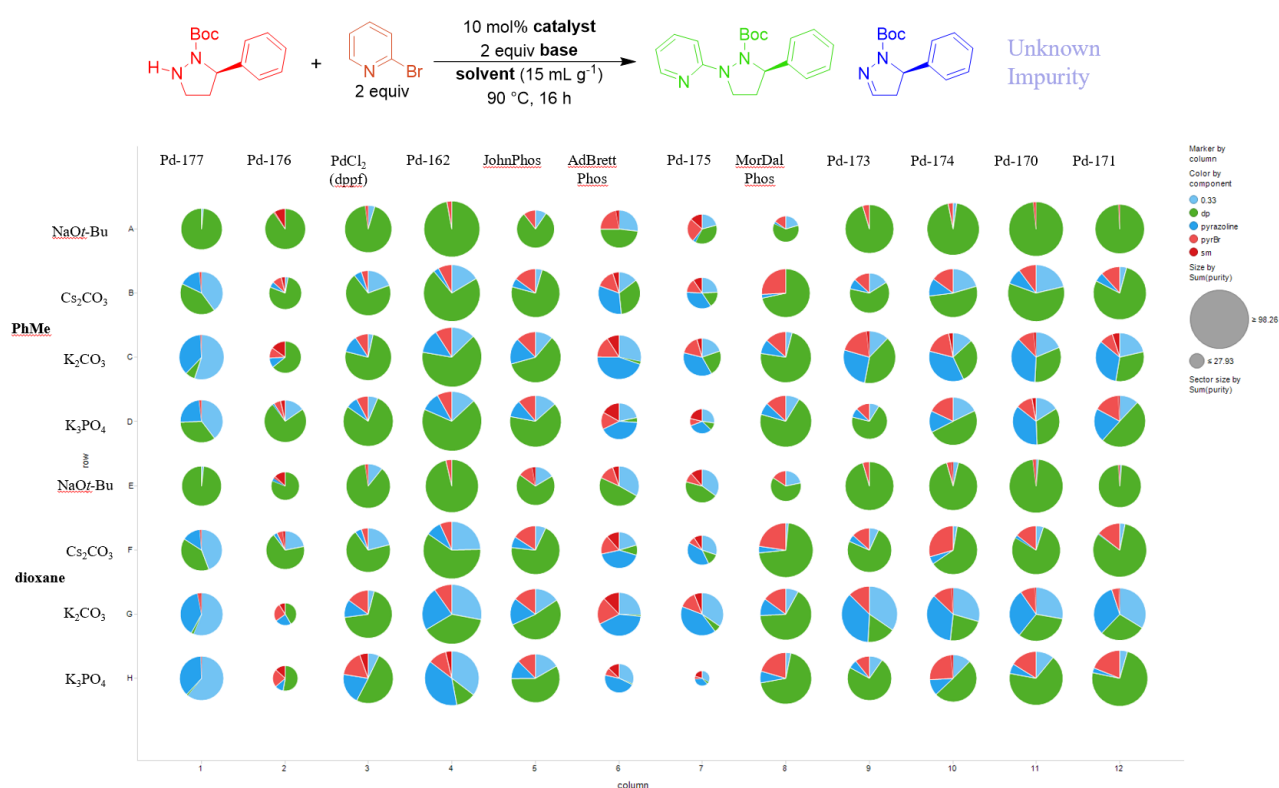

**Figure S1** High throughput screening of the Buchwald-Hartwig coupling using **13**

From this reaction screen conditions used in vial A11 were chosen for subsequent Buchwald-Hartwig aminations (see general method 5).



### **General method 5: Buchwald-Hartwig Amination**

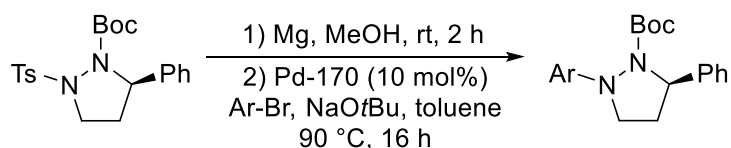

N.B. Magnesium turnings were activated by washing them with 1 M hydrochloric acid solution (2 x 20 mL), water (20 mL) and methanol (20 mL).

*tert*-Butyl-(*R*)-5-phenyl-2-tosylpyrazolidine-1-carboxylate (**8j**) (1.0 equiv), activated magnesium turnings (5.0 equiv) and MeOH (0.1 M) were combined and stirred (800 rpm) at room temperature for 2 hours. The solution was quenched with saturated ammonium chloride solution (5 mL), then extracted with dichloromethane (3 x 5 mL). The combined organic extracts were dried over MgSO<sub>4</sub> and concentrated in vacuo to give a clear oil. To this was added toluene (1.0 M) was added XPhos Pd(crotyl)Cl (0.1 equiv), sodium *tert*-butoxide (2.0 equiv) and aryl halide (2.0 equiv). The reaction mixture was stirred at 90 °C for 16 h. The mixture was cooled to rt then quenched with saturated ammonium chloride solution (5 mL) and extracted with dichloromethane (3 x 5 mL). The combined organic extracts were dried over magnesium sulphate and concentrated *in vacuo*. The crude product was purified by column chromatography (30% ethyl acetate in petroleum ether) to give the following compounds.

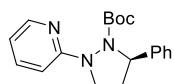

#### ***tert*-Butyl (*R*)-5-phenyl-2-(pyridin-2-yl)pyrazolidine-1-carboxylate (**9a**).**

Following general method 5, **8j** (72 mg, 0.18 mmol, 1.0 equiv), magnesium turnings (22 mg, 0.90 mmol, 5.0 equiv) and methanol (1.8 mL, 0.1 M), then XPhos Pd(crotyl)Cl (12 mg, 18 μmol, 0.1 equiv), sodium *tert*-butoxide (35 mg, 0.36 mmol, 2.0 equiv) and 2-bromopyridine (34 μL, 0.36 mmol, 2.0 equiv) in toluene (0.18 mL, 1.0 M) yielded **9a** as a white solid (50 mg, 0.16 mmol, 85%). M.p. 98-99 °C; *R*<sub>f</sub> = 0.34 (30% ethyl acetate in petroleum ether); [α]<sub>D</sub><sup>25</sup> -91.3 (c 0.04, CHCl<sub>3</sub>); IR (film) 2989, 1698, 1588, 1388, 1161 cm<sup>-1</sup>; <sup>1</sup>H (500 MHz; CDCl<sub>3</sub>) 8.25 (1H, d, *J* 4.8, Ar-H), 7.59 (1H, td, *J* 7.8, 1.8, Ar-H), 7.30-7.18 (5H, m, Ar-H), 6.95 (1H, d, *J* 8.4, Ar-H), 6.82 (1H, dd, *J* 6.7, 5.3, Ar-H), 5.19 (1H, t, *J* 8.1, CHPh), 4.89 (1H, t, *J* 10.3, NCHH), 3.49-3.41 (1H, m, NCHH), 2.58-2.51 (1H, m, CHPhCHH), 2.09-1.98 (1H, m, CHPhCHH), 1.43 (9H, s, C(CH<sub>3</sub>)<sub>3</sub>); <sup>13</sup>C (125 MHz; CDCl<sub>3</sub>) 160.9 (Ar-C), 156.8 (C=O), 147.3 (Ar-CH), 142.1 (Ar-C), 137.5 (Ar-CH), 128.4 (Ar-CH), 127.2 (Ar-CH), 126.6 (Ar-CH), 115.8 (Ar-CH), 110.4 (Ar-CH), 81.5 (C), 65.5 (CH), 48.2 (CH<sub>2</sub>), 36.2 (CH<sub>2</sub>), 28.2 (CH<sub>3</sub>); HRMS (ESI<sup>+</sup>) calculated for C<sub>19</sub>H<sub>24</sub>N<sub>3</sub>O<sub>2</sub> [M+Na]<sup>+</sup> 326.1863; found 326.1867.

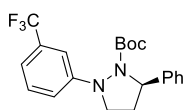

**tert-Butyl (R)-5-phenyl-2-(3-(trifluoromethyl)phenyl)pyrazolidine-1-carboxylate (9c).**

Following general method 5, **8j** (85 mg, 0.21 mmol, 1.0 equiv), magnesium turnings (26 mg, 1.05 mmol, 5.0 equiv) and methanol (2.1 mL, 0.1 M), then XPhos Pd(crotyl)Cl (7 mg, 10  $\mu$ mol, 0.05 equiv), sodium *tert*-butoxide (40 mg, 0.42 mmol, 2.0 equiv) and 3-bromobenzotrifluoride (55  $\mu$ L, 0.42 mmol, 2.0 equiv) in toluene (0.21 mL, 1.0 M) yielded **9c** as a clear oil (69 mg, 0.18 mmol, 85%).  $R_f$  = 0.28 (20% ethyl acetate in petroleum ether);  $[\alpha]^{32}_D$  -9.8 (c 0.25, dichloromethane). IR (film) 2978, 2930, 1704, 1451, 1367, 1164  $\text{cm}^{-1}$ ;  $\delta H$  (500 MHz;  $\text{CDCl}_3$ ) 7.37 (1H, t,  $J$  8.0, Ar-CH), 7.30-7.21 (5H, m, Ar-H), 7.19 (1H, s, Ar-H), 7.15 (1H, d,  $J$  7.6, Ar-H), 7.11 (1H, dd,  $J$  8.3, 1.6, Ar-CH), 5.20 (1H, t,  $J$  7.5, CHPh), 3.85 (1H, ddd,  $J$  11.0, 6.5, 4.5, NCHH), 3.69 (1H, ddd,  $J$  11.0, 8.9, 6.3, NCHH), 2.54 (1H, qd,  $J$  6.3, 4.5, CHPhCHH), 2.13 (1H, dt,  $J$  15.7, 7.2, CHPhCHH), 1.39 (9H, s,  $\text{C}(\text{CH}_3)_3$ );  $\delta C$  (125 MHz;  $\text{CDCl}_3$ ) 156.1 (C=O), 150.7 (Ar-C), 141.4 (Ar-C), 131.1 (q,  $J$  32.5, Ar-C), 129.3 (Ar-CH), 128.5 (Ar-CH), 127.4 (Ar-CH), 126.7 (Ar-CH), 124.3 (q,  $J$  271.3,  $\text{CF}_3$ ), 118.2 (Ar-CH), 117.9 (q,  $J$  3.8, Ar-CH), 111.9 (q,  $J$  3.8, Ar-CH), 81.7 (C), 63.3 (CH), 52.3 ( $\text{CH}_2$ ), 35.4 ( $\text{CH}_2$ ), 28.1 ( $\text{CH}_3$ );  $\delta F$  (282 MHz;  $\text{CDCl}_3$ ) -62.8 ( $\text{CF}_3$ ); HRMS (ESI<sup>+</sup>) calculated for  $\text{F}_3\text{C}_{21}\text{H}_{23}\text{N}_2\text{O}_2$   $[\text{M}+\text{Na}]^+$  415.1604; found 415.1597.

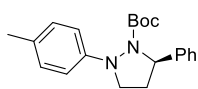

**tert-Butyl (R)-5-phenyl-2-(p-tolyl)pyrazolidine-1-carboxylate (9e).**

Following general method 5, **8j** (105 mg, 0.26 mmol, 1.0 equiv), magnesium turnings (32 mg, 1.30 mmol, 5.0 equiv) and methanol (2.6 mL, 0.1 M), then XPhos Pd(crotyl)Cl (18 mg, 26  $\mu$ mol, 0.1 equiv), sodium *tert*-butoxide (50 mg, 0.52 mmol, 2.0 equiv) and 4-chlorotoluene (63  $\mu$ L, 0.52 mmol, 2.0 equiv) in toluene (0.26 mL, 1.0 M) yielded **9e** as an orange oil (73 mg, 0.22 mmol, 82%).  $R_f$  = 0.30 (30% ethyl acetate in petroleum ether);  $[\alpha]^{32}_D$  -27.5 (c 0.26, dichloromethane); IR (film) 2978, 2924, 1697, 1512, 1366, 1134  $\text{cm}^{-1}$ ;  $\delta H$  (400 MHz;  $\text{CDCl}_3$ ) 7.30-7.23 (5H, m, Ar-H), 7.08 (2H, d,  $J$  8.4, Ar-H), 6.91 (2H, d,  $J$  8.5, Ar-H), 5.09 (1H, t,  $J$  7.8, CHPh), 3.95-3.80 (1H, m, NCHH), 3.62-3.54 (1H, m, NCHH), 2.54-2.42 (1H, m, CHPhCHH), 2.29 (3H, s, Ar- $\text{CH}_3$ ), 2.09-1.99 (1H, m, CHPhCHH), 1.35 (9H, s,  $\text{C}(\text{CH}_3)_3$ );  $\delta C$  (100 MHz;  $\text{CDCl}_3$ ) 148.3 (Ar-C), 142.2 (Ar-C), 130.3 (Ar-C), 129.4 (Ar-CH), 128.3 (Ar-CH), 127.1 (Ar-CH), 126.9 (Ar-CH), 115.8 (Ar-CH), 81.0 (C), 63.6 (CH), 53.0 ( $\text{CH}_2$ ), 35.7 ( $\text{CH}_2$ ), 28.2 ( $\text{CH}_3$ ), 20.5 ( $\text{CH}_3$ ), C=O not seen; HRMS (ESI<sup>+</sup>) calculated for  $\text{C}_{21}\text{H}_{26}\text{N}_2\text{O}_2$   $[\text{M}+\text{Na}]^+$  361.1892; found 361.1896.

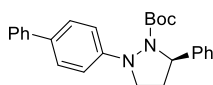

**tert-Butyl (R)-2-([1,1'-biphenyl]-4-yl)-5-phenylpyrazolidine-1-carboxylate (9f).**

Following general method 5, **8j** (101 mg, 0.25 mmol, 1.0 equiv), magnesium turnings (30 mg, 1.25 mmol, 5.0 equiv) and methanol (2.5 mL, 0.1 M), then XPhos Pd(crotyl)Cl (8 mg, 12  $\mu$ mol, 0.05 equiv), sodium *tert*-butoxide (48 mg, 0.50 mmol, 2.0 equiv) and 4-bromobiphenyl (116 mg, 0.50 mmol, 2.0 equiv) in toluene (0.25 mL,

1.0 M) yielded **9f** as a clear oil (73 mg, 0.18 mmol, 73%).  $R_f = 0.17$  (15% ethyl acetate in petroleum ether);  $[\alpha]^{32}_D -28.2$  (c 0.19,  $\text{CHCl}_3$ ); IR (film) 3030, 2977, 1700, 1608, 1366, 1132  $\text{cm}^{-1}$ ;  $\delta H$  (500 MHz;  $\text{CDCl}_3$ ) 7.61 (2H, d,  $J$  7.4, Ar-H), 7.56 (2H, d,  $J$  8.7, Ar-CH), 7.44 (2H, t,  $J$  7.7, Ar-CH), 7.31-7.27 (6H, m, Ar-H), 7.10 (2H, d,  $J$  8.6, Ar-H), 5.18 (1H, t,  $J$  7.6,  $\text{CHPh}$ ), 3.96 (1H, ddd,  $J$  10.7, 6.2, 4.2,  $\text{NCHH}$ ), 3.74-3.64 (1H, m,  $\text{NCHH}$ ), 2.61-2.53 (1H, m,  $\text{CHPhCHH}$ ), 2.20-2.10 (1H, m,  $\text{CHPhCHH}$ ), 1.41 (9H, s,  $\text{C}(\text{CH}_3)_3$ );  $\delta C$  (125 MHz;  $\text{CDCl}_3$ ) 155.9 (C=O), 149.7 (Ar-C), 141.9 (Ar-C), 140.9 (Ar-C), 133.8 (Ar-C), 128.7 (Ar-CH), 128.4 (Ar-CH), 127.5 (Ar-CH), 127.3 (Ar-CH), 126.9 (Ar-CH), 126.6 (Ar-CH), 126.6 (Ar-CH), 115.9 (Ar-CH), 81.4 (C), 63.6 (CH), 52.8 ( $\text{CH}_2$ ), 35.7 ( $\text{CH}_2$ ), 28.2 ( $\text{CH}_3$ ); HRMS (ESI<sup>+</sup>) calculated for  $\text{C}_{26}\text{H}_{28}\text{N}_2\text{O}_2$   $[\text{M}+\text{Na}]^+$  423.2043; found 423.2037.

### **Nitrogen Functionalisation: Acylation**

N.B. Magnesium turnings were activated by washing them with 1.0 M hydrochloric acid solution (2 x 20 mL), water (20 mL) and methanol (20 mL).

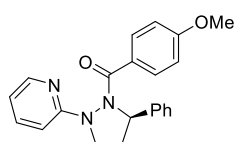

#### **(R)-(4-Methoxyphenyl)(5-phenyl-2-(pyridin-2-yl)pyrazolidin-1-**

#### **yl)methanone (10a).** Cyclic hydrazine **9a** (29 mg, 90 $\mu\text{mol}$ , 1.0 equiv)

was dissolved in 4 M HCl/dioxane solution (2 mL) and stirred for 2 h. It was then concentrated *in vacuo* and 4-methoxybenzoyl chloride (38 mg, 0.23 mmol, 2.5 equiv) in dichloromethane (90  $\mu\text{L}$ , 0.1 M) was added. The reaction mixture was cooled over an ice bath then *N,N*-diisopropylethylamine (31  $\mu\text{L}$ , 0.18 mmol, 2.0 equiv) in dichloromethane (2 mL) was added dropwise over 30 min. The reaction mixture was allowed to warm to rt then stirred for 18 h. The mixture was then quenched with 1 M hydrochloric acid (5 mL), extracted with dichloromethane (3 x 5 mL) and dried over  $\text{MgSO}_4$ . It was then concentrated *in vacuo* and the crude product was purified by column chromatography (25% ethyl acetate in petroleum ether) to give **10a** as a white solid (26 mg, 70  $\mu\text{mol}$ , 82%).  $R_f = 0.21$  (25% ethyl acetate in petroleum ether); M.p. 131-132  $^\circ\text{C}$ ;  $[\alpha]^{32}_D -26.7$  (c 0.06,  $\text{CH}_2\text{Cl}_2$ ). IR (film) 2924, 1643, 1597, 1466, 1258  $\text{cm}^{-1}$ ;  $\delta H$  (400 MHz;  $\text{CDCl}_3$ ) 8.25 (1H, d,  $J$  4.0, Ar-H), 7.78 (2H, d,  $J$  8.4, Ar-H), 7.45 (1H, t,  $J$  7.6, Ar-H), 7.26-7.19 (5H, m, Ar-H), 6.88-6.74 (4H, m, Ar-H), 5.60 (1H, s,  $\text{CHPh}$ ), 4.65 (1H, br s,  $\text{NCHH}$ ), 3.78 (3H, s,  $\text{OCH}_3$ ), 3.60 (1H, s,  $\text{NCHH}$ ), 2.63 (1H, dt,  $J$  12.4, 6.1,  $\text{CHPhCHH}$ ), 2.22 (1H, td,  $J$  13.4, 7.2,  $\text{CHPhCHH}$ );  $\delta C$  (100 MHz;  $\text{CDCl}_3$ ) 161.9 (C=O), 147.8 (Ar-CH), 141.0 (Ar-C), 137.5 (Ar-CH), 130.7 (Ar-C), 128.5 (Ar-CH), 127.3 (Ar-CH), 126.9 (Ar-CH), 126.4 (Ar-C), 116.4 (Ar-CH), 113.3 (Ar-CH), 110.6 (Ar-CH), 69.6 (CH), 55.3 ( $\text{CH}_3$ ), 34.0 ( $\text{CH}_2$ ), 1 Ar-CH, 1  $\text{CH}_2$  and 1 Ar-C not seen; HRMS (ESI<sup>+</sup>) calculated for  $\text{C}_{22}\text{H}_{21}\text{N}_3\text{O}_2$   $[\text{M}+\text{H}]^+$  360.1712; found 360.1712.

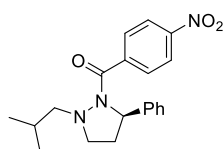

**(R)-(2-Isobutyl-5-phenylpyrazolidin-1-yl)(4-nitrophenyl)methanone**

**(10b).** Cyclic hydrazine **9b** (43 mg, 0.14 mmol, 1.0 equiv) was dissolved in 4 M HCl/dioxane solution (2 mL) and stirred for 2 h. It was then concentrated *in vacuo* and a solution of 4-nitrobenzoyl chloride (63 mg,

0.34 mmol, 2.5 equiv) in dichloromethane (135  $\mu$ L, 0.1 M) were added. The mixture was cooled over an ice bath then *N,N*-diisopropylethylamine (47  $\mu$ L, 0.27 mmol, 2.0 equiv) in dichloromethane (2.0 mL) was added dropwise over 30 minutes. The reaction mixture was allowed to warm to rt then stirred for 18 h. The reaction mixture was then quenched with 1 M hydrochloric acid (5 mL), extracted with dichloromethane (3  $\times$  5 mL) and dried over magnesium sulphate. It was then concentrated *in vacuo* and the crude product was purified by column chromatography (20% ethyl acetate in petroleum ether) to give **10b** as a white solid (37 mg, 0.1 mmol, 77%).  $R_f$  = 0.18 (20% ethyl acetate in petroleum ether);  $[\alpha]_D^{32} +5.2$  ( $c$  0.17,  $\text{CHCl}_3$ ); Enantiomeric excess (95% ee) was determined by HPLC analysis (25  $^\circ\text{C}$ ). [Chiralpak IA column 2-propanol/hexane = 10/90; flow rate = 1.0 mL/min; detection wavelength = 254 nm]  $t_R$  17.4 min;  $t_R$  36.3 min; IR (film) 2923, 2851, 1635, 1521, 1346  $\text{cm}^{-1}$ ;  $\delta H$  (500 MHz;  $\text{CDCl}_3$ ) 8.24 (2H, d,  $J$  8.6, Ar-H), 7.84-7.74 (2H, br m, Ar-H), 7.33 (5H, br m, Ar-H), 5.48 (1H, br s,  $\text{CHPh}$ ), 3.24-3.09 (1H, br m,  $\text{NCH}_2\text{CH}_2$ ), 2.83-2.74 (1H, br m,  $\text{CHPhCHH}$ ), 2.49-2.29 (3H, br m,  $\text{CHPhCHH}$  and  $\text{CH}_2\text{CH}(\text{CH}_3)_2$ ), 1.45 (1H, br s,  $\text{CH}(\text{CH}_3)_2$ ), 0.55 (6H, s,  $\text{CH}(\text{CH}_3)_2$ );  $\delta C$  (125 MHz;  $\text{CDCl}_3$ ) 166.6 (C=O), 148.2 (Ar-C), 142.8 (Ar-C), 142.1 (Ar-C), 129.0 (Ar-CH), 128.6 (Ar-CH), 125.7 (Ar-CH), 123.6 (Ar-CH), 122.9 (Ar-CH), 65.8 ( $\text{CH}_2$ ), 61.8 (CH), 33.2 ( $\text{CH}_2$ ), 27.2 (CH), 20.5 ( $\text{CH}_3$ ), 20.2 ( $\text{CH}_3$ ), 1  $\text{CH}_2$  not seen; HRMS (ESI $^+$ ) calculated for  $\text{C}_{20}\text{H}_{23}\text{N}_3\text{O}_3$   $[\text{M}+\text{Na}]^+$  376.1632; found 376.1632.

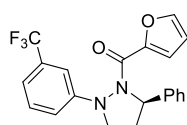

**(R)-Furan-2-yl(5-phenyl-2-(3-(trifluoromethyl)phenyl)pyrazolidin-1-yl)methanone (10c).**

Cyclic hydrazine **9c** (41 mg, 0.10 mmol, 1.0 equiv) was dissolved in 4 M HCl/dioxane solution (2 mL) and stirred for 2 h. It was

then concentrated *in vacuo* then 2-furoyl chloride (26  $\mu$ L, 0.26 mmol, 2.5 equiv) and dichloromethane (100  $\mu$ L, 0.1 M) were added. The reaction mixture was cooled over an ice bath then a solution of *N,N*-diisopropylethylamine (37  $\mu$ L, 0.21 mmol, 2.0 equiv) in dichloromethane (2 mL) was added dropwise over 30 minutes. The mixture was allowed to warm to rt then stirred for 18 h. The mixture was then quenched with 1 M hydrochloric acid (5 mL), extracted with dichloromethane (3  $\times$  5 mL) and dried over magnesium sulphate. It was then concentrated *in vacuo* and the crude product was purified by column chromatography (25% ethyl acetate in petroleum ether) to give **10c** as a yellow solid (28 mg, 71  $\mu$ mol, 69%).  $R_f$  = 0.18 (25% ethyl acetate in petroleum ether);  $[\alpha]_D^{32} +0.9$  ( $c$  0.33,  $\text{CHCl}_3$ ). IR (film) 2927, 1649, 1470, 1337, 1124  $\text{cm}^{-1}$ ;  $\delta H$  (500 MHz;  $\text{CDCl}_3$ ) 7.55 (1H, s, Ar-H), 7.40-7.21 (9H, m, Ar-H), 6.95 (1H, d,  $J$  3.0, Ar-H), 6.38 (1H, dd,  $J$  3.5 and 1.6, Ar-H), 5.75 (1H, t,  $J$

8.2, *CHPh*), 4.12-4.07 (1H, br m, *NCHH*), 3.62-3.48 (1H, br m, *NCHH*), 2.68-2.62 (1H, m, *CHPhCHH*), 2.37-2.28 (1H, m, *CHPhCHH*);  $\delta C$  (125 MHz;  $CDCl_3$ ) 162.5 (C=O, seen on HMBC), 150.3 (Ar-C), 145.7 (Ar-CH), 139.8 (Ar-C), 131.6 (q, *J* 31.3, Ar-C), 129.7 (Ar-CH), 128.4 (Ar-CH), 127.6 (Ar-CH), 123.9 (q, *J* 270, Ar-C), 119.5 (Ar-CH), 118.7 (Ar-CH), 118.2 (Ar-CH), 112.9 (Ar-CH), 111.7 (Ar-CH), 62.5 (CH), 54.3 ( $CH_2$ ), 32.6 ( $CH_2$ ), 1 Ar-C and 1 Ar-CH not seen;  $\delta F$  (282 MHz;  $CDCl_3$ ) -62.8 ( $CF_3$ ); HRMS (ESI<sup>+</sup>) calculated for  $F_3C_{21}H_{17}N_2O_2$   $[M+Na]^+$  409.1134; found 409.1131.

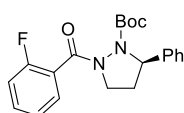

**tert-Butyl (R)-2-(2-fluorobenzoyl)-5-phenylpyrazolidine-1-carboxylate**

**(9d).** Cyclic hydrazine **8j** (64 mg, 0.16 mmol, 1.0 equiv), magnesium turnings (19 mg, 0.80 mmol, 5.0 equiv) and methanol (1.6 mL, 0.1 M) were combined

and stirred (800 rpm) at room temperature for 2 hours. The solution was quenched with saturated ammonium chloride solution (5 mL), then extracted with dichloromethane (3 x 5 mL). The combined organic extracts were dried over  $MgSO_4$  and concentrated *in vacuo* to give a clear oil. To this was added then 2-fluorobenzoyl chloride (48  $\mu L$ , 0.40 mmol, 2.5 equiv) in dichloromethane (1.6 mL). The reaction mixture was stirred at rt for 18 h. The mixture was concentrated *in vacuo*. The crude product was purified by column chromatography (25% ethyl acetate in petroleum ether) to give **9d** as a clear oil (46 mg, 0.12 mmol, 77%).  $R_f$  = 0.21 (25% ethyl acetate in petroleum ether).  $[\alpha]^{32}_D +7.1$  (c 0.12,  $CHCl_3$ ). IR (film) 2978, 1725, 1714, 1368, 1154  $cm^{-1}$ ;  $\delta H$  (500 MHz;  $d_6$ -DMSO at 373 K) 7.47 (1H, d, *J* 5.3, Ar-H), 7.39-7.25 (5H, m, Ar-H), 7.25-7.13 (3H, m, Ar-H), 5.27 (1H, t, *J* 6.6, *CHPh*), 4.05-3.91 (1H, br m, *NCHH*), 3.47 (1H, dd, *J* 17.9 and 8.5, *NCHH*), 2.69-2.60 (1H, m, *CHPhCHH*), 2.23-2.16 (1H, br m, *CHPhCHH*), 1.38 (9H, s,  $C(CH_3)_3$ );  $\delta C$  (125 MHz;  $d_6$ -DMSO at 373 K) 159.9 (C=O), 157.9 (C=O), 143.7 (Ar-C, seen on HMBC), 141.7 (Ar-C, seen on HMBC), 141.3 (Ar-C, seen on HMBC), 132.5 (d, *J* 7.5, Ar-CH), 129.2 (d, *J* 2.5, Ar-CH), 129.1 (Ar-CH), 128.7 (Ar-CH), 127.6 (Ar-CH), 127.0 (Ar-CH), 126.7 (Ar-CH), 116.2 (d, *J* 21.3, 82.1 Ar-C), 63.5 (CH), 28.0 ( $CH_3$ ), 2 x  $CH_2$ , 2 x C=O and 1 x Ar-C not seen;  $\delta F$  (282 MHz;  $CDCl_3$ ) -112.3 (CF); HRMS (ESI<sup>+</sup>) calculated for  $C_{21}H_{23}N_2O_3F$   $[M+Na]^+$  393.1585; found 393.1587.

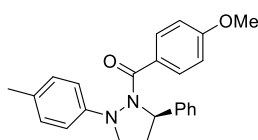

**(R)-(4-Methoxyphenyl)(5-phenyl-2-(p-tolyl)pyrazolidin-1-**

**yl)methanone (10e).** Cyclic hydrazine **9e** (34 mg, 0.1 mmol, 1.0 equiv)

was dissolved in 4 M HCl/dioxane solution (2 mL) and stirred for 2 h. It

was then concentrated *in vacuo* and 4-methoxybenzoyl chloride (34  $\mu L$ , 0.25 mmol, 2.5 equiv) and dichloromethane (100  $\mu L$ , 0.1 M) were added. The reaction mixture was cooled over an ice bath then a solution of *N,N*-diisopropylethylamine (36  $\mu L$ , 0.21 mmol, 2.0 equiv) in dichloromethane (2.0 mL) was added dropwise over 30 minutes. The mixture was allowed to warm to rt then stirred for 18 h. The mixture was then quenched with 1 M hydrochloric

acid (5 mL), extracted with dichloromethane (3 x 5 mL) and dried over magnesium sulphate. It was then concentrated *in vacuo*. The crude product was purified by column chromatography (25% ethyl acetate in petroleum ether) to give **10e** as a white solid (32 mg, 86  $\mu$ mol, 84%).  $R_f$  = 0.18 (25% ethyl acetate in petroleum ether); M.p. 165-166 °C;  $[\alpha]^{32}_D$  – 3.8 (*c* 0.17, CHCl<sub>3</sub>); IR (film) 2923, 1635, 1509, 1254, 1175 cm<sup>-1</sup>;  $\delta H$  (400 MHz; CDCl<sub>3</sub>) 7.81-7.73 (2H, br m, Ar-H), 7.78 (2H, d, *J* 8.4, Ar-CH), 7.32 (2H, t, *J* 7.4, Ar-H), 7.26 (1H, t, *J* 7.2, Ar-H), 7.05 (2H, d, *J* 8.2, Ar-H), 6.91 (2H, d, *J* 8.1, Ar-H), 6.78 (2H, d, *J* 8.8, Ar-H), 5.72-5.64 (1H, br m, CHPh), 3.92-3.79 (1H, br m, NCHH), 3.80 (3H, s, OCH<sub>3</sub>), 3.60-3.39 (1H, br m, NCHH), 2.58 (1H, sextet, *J* 12.0, CHPhCHH), 2.32-2.18 (4H, br m, CHPhCHH and CH<sub>3</sub>Ar);  $\delta C$  (100 MHz; CDCl<sub>3</sub>) 161.7 (Ar-C), 132.3 (Ar-CH), 130.9 (Ar-CH), 129.5 (Ar-CH), 128.4 (Ar-CH), 127.2 (Ar-CH), 126.9 (Ar-C), 113.8 (Ar-CH), 113.0 (Ar-CH), 62.8 (CH, seen on HSQC), 55.2 (OCH<sub>3</sub>), 29.7 (CH<sub>2</sub>), 20.5 (CH<sub>3</sub>), 3 Ar-C, 1 CH<sub>2</sub> and 1 C=O not seen; HRMS (ESI<sup>+</sup>) calculated for C<sub>24</sub>H<sub>24</sub>N<sub>2</sub>O<sub>2</sub> [M+Na]<sup>+</sup> 395.1730; found 395.1727.

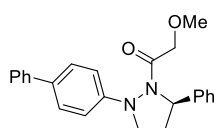

**(R)-1-(2-([1,1'-Biphenyl]-4-yl)-5-phenylpyrazolidin-1-yl)-2-**

**methoxyethan-1-one (10f).** Cyclic hydrazine **9f** (45 mg, 0.11 mmol, 1.0 equiv) was dissolved in 4 M HCl/dioxane solution (2.0 mL) and stirred for

2 h. It was then concentrated *in vacuo* and methoxyacetyl chloride (26  $\mu$ L, 0.28 mmol, 2.5 equiv) and dichloromethane (110  $\mu$ L, 0.1 M) were added. The reaction mixture was cooled over an ice bath then a solution of *N,N*-diisopropylethylamine (39  $\mu$ L, 0.22 mmol, 2.0 equiv) in dichloromethane (2.0 mL) was added dropwise over 30 minutes. The reaction mixture was allowed to warm to rt then stirred for 18 h. The reaction mixture was then quenched with 1 M hydrochloric acid (5 mL), extracted with dichloromethane (3 x 5 mL) and dried over magnesium sulphate. It was then concentrated *in vacuo* and the crude product was purified by column chromatography (50% ethyl acetate in petroleum ether) to give **10f** as a white solid (28 mg, 74  $\mu$ mol, 66%).  $R_f$  = 0.16 (50% ethyl acetate in petroleum ether);  $[\alpha]^{32}_D$  – 17.5 (*c* 0.35, CHCl<sub>3</sub>). IR (film) 2926, 1686, 1485, 1197, 1128 cm<sup>-1</sup>;  $\delta H$  (500 MHz; CDCl<sub>3</sub>) 7.57 (2H, d, *J* 7.3, Ar-H), 7.51 (2H, d, *J* 8.4, Ar-CH), 7.46-7.38 (4H, m, Ar-H), 7.37-7.23 (4H, m, Ar-H), 7.06 (2H, d, *J* 8.5, Ar-H), 5.46 (1H, t, *J* 8.5, CHPh), 4.48 (1H, d, *J* 15.5, NCHH), 4.06 (2H, d, *J* 15.6, CH<sub>2</sub>OMe) 3.49-3.43 (4H, m, NCHH and OCH<sub>3</sub>), 2.63-2.56 (1H, m, CHPhCHH), 2.35-2.25 (1H, br m, CHPhCHH);  $\delta C$  (125 MHz; CDCl<sub>3</sub>) 174.5 (C=O), 148.9 (Ar-C), 140.3 (Ar-C), 140.1 (Ar-C), 135.0 (Ar-C), 128.8 (Ar-CH), 128.4 (Ar-CH), 127.8 (Ar-CH), 127.5 (Ar-CH), 127.0 (Ar-CH), 126.7 (Ar-CH), 116.3 (Ar-CH), 70.5 (CH<sub>2</sub>), 61.8 (CH), 59.4 (OCH<sub>3</sub>), 54.4 (CH<sub>2</sub>), 32.0 (CH<sub>2</sub>), 1 Ar-CH not seen; HRMS (ESI<sup>+</sup>) calculated for C<sub>24</sub>H<sub>24</sub>N<sub>2</sub>O<sub>2</sub> [M+Na]<sup>+</sup> 395.1730; found 395.1721.

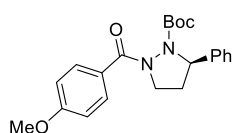

**tert-Butyl (R)-2-(4-methoxybenzoyl)-5-phenylpyrazolidine-1-carboxylate (9g).**

Cyclic hydrazine **8j** (36 mg, 90  $\mu$ mol, 1.0 equiv), magnesium turnings (11 mg, 0.45 mmol, 5.0 equiv) and methanol (0.9 mL, 0.1 M) were combined and stirred (800 rpm) at room temperature for 2 hours. The solution was quenched with saturated ammonium chloride solution (5 mL), then extracted with dichloromethane (3 x 5 mL). The combined organic extracts were dried over magnesium sulphate and concentrated *in vacuo* to give a clear oil. Then a solution of 4-methoxybenzoyl chloride (30  $\mu$ L, 0.23 mmol, 2.5 equiv) in dichloromethane (0.9 mL) were added. The reaction mixture was stirred at rt for 18 h. The mixture was concentrated *in vacuo*. The crude product was purified by column chromatography (25% ethyl acetate in petroleum ether) to give **9g** as a clear oil (27 mg, 70  $\mu$ mol, 80%).  $R_f$  = 0.21 (25% ethyl acetate in petroleum ether);  $[\alpha]_D^{32} +19.6$  (c 0.18, dichloromethane); IR (film) 2989, 2924, 1712, 1611, 1388, 1161  $\text{cm}^{-1}$ ;  $\delta H$  (400 MHz;  $\text{CDCl}_3$ ) 7.58-7.49 (2H, m, Ar-H), 7.36-7.23 (5H, m, Ar-H), 6.79 (2H, d,  $J$  8.4, Ar-H), 5.32 (1H, br s, CHPh), 4.34-4.17 (1H, m, NCHH), 3.81 (3H, s,  $\text{OCH}_3$ ), 3.54 (1H, d,  $J$  8.6, NCHH), 2.55 (1H, dtd,  $J$  12.5, 8.3, 4.2, CHPhCHH), 2.27 (1H, br s, CHPhCHH), 1.35 (9H, s,  $\text{C}(\text{CH}_3)_3$ );  $\delta C$  (100 MHz;  $\text{CDCl}_3$ ) 161.6 (C=O), 140.6 (Ar-C), 132.2 (Ar-C), 130.2 (Ar-CH), 128.6 (Ar-CH), 127.5 (Ar-CH), 126.5 (Ar-CH), 113.1 (Ar-CH), 82.3 (C), 62.9 (CH), 55.3 ( $\text{CH}_3$ ), 36.2 ( $\text{CH}_2$ ), 28.0 ( $\text{CH}_3$ ), C=O, Ar-C and  $\text{CH}_2$  not seen; HRMS (ESI<sup>+</sup>) calculated for  $\text{C}_{22}\text{H}_{26}\text{N}_2\text{O}_4$   $[\text{M}+\text{Na}]^+$  405.1790; found 405.1793.

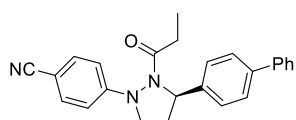

**(R)-4-(3-([1,1'-Biphenyl]-4-yl)-2-propionylpyrazolidin-1-**

**yl)benzonitrile (10h).** Cyclic hydrazine **9h** (20 mg, 47  $\mu$ mol, 1.0 equiv) was dissolved in 4 M HCl/dioxane solution (2.0 mL) and

stirred for 2 h. It was then concentrated *in vacuo* then propionyl chloride (12  $\mu$ L, 0.14 mmol, 2.5 equiv) and dichloromethane (47  $\mu$ L, 0.1 M) were added. The reaction mixture was cooled over an ice bath then a solution of *N,N*-diisopropylethylamine (16  $\mu$ L, 94  $\mu$ mol, 2.0 equiv) in dichloromethane (2 mL) was added dropwise over 30 minutes. The mixture was allowed to warm to rt then stirred for 18 h. The mixture was then quenched with 1 M hydrochloric acid (5 mL), extracted with dichloromethane (3 x 5 mL) and dried over magnesium sulphate. It was then concentrated *in vacuo* and the crude product was purified by column chromatography (50% ethyl acetate in petroleum ether) to give **10h** as a yellow oil (12 mg, 31  $\mu$ mol, 66%).  $R_f$  = 0.16 (50% ethyl acetate in petroleum ether);  $[\alpha]_D^{32} -22.2$  (c 0.12,  $\text{CHCl}_3$ ). IR (film) 2925, 2220, 1675, 1603, 1504, 1175  $\text{cm}^{-1}$ ;  $\delta H$  (500 MHz;  $\text{CDCl}_3$ ) 7.56 (4H, t,  $J$  7.7, Ar-H), 7.53 (2H, d,  $J$  8.3, Ar-H), 7.45 (2H, t,  $J$  7.6, Ar-H), 7.40-7.34 (3H, m, Ar-H), 7.03 (2H, d,  $J$  8.4, Ar-H), 5.51 (1H, t,  $J$  7.3, CHPh), 4.12-4.04 (1H, br m, NCHH), 3.60-3.52 (1H, m, NCHH), 2.67-2.52 (2H, m, CHPhCHH and  $\text{CO}_2\text{CHH}$ ), 2.35-2.20 (2H, m, CHPhCHH and  $\text{CO}_2\text{CHH}$ ), 1.12 (3H, t,  $J$  7.4,  $\text{CH}_3$ );  $\delta C$  (125 MHz;  $\text{CDCl}_3$ ) 153.5 (C=O), 140.7 (Ar-C), 140.5

(Ar-C), 139.1 (Ar-C), 133.5 (Ar-CH), 128.8 (Ar-CH), 128.1 (Ar-CH), 127.4 (Ar-CH), 127.3 (Ar-CH), 127.1 (Ar-CH), 119.2 (Ar-C), 115.3 (Ar-CH), 114.1 (Ar-CH), 104.0 (CN), 61.2 (CH), 53.1 (CH<sub>2</sub>), 33.7 (CH<sub>2</sub>), 26.4 (CH<sub>2</sub>), 8.6 (CH<sub>3</sub>); HRMS (ESI<sup>+</sup>) calculated for C<sub>25</sub>H<sub>23</sub>N<sub>3</sub>O [M+Na]<sup>+</sup> 404.1733; found 404.1732.

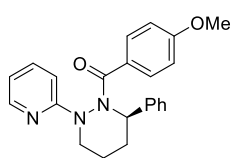

**(R)-(4-Methoxyphenyl)(6-phenyl-2-(pyridin-2-yl)tetrahydropyridazin-1(2H)-yl)methanone (10i).**

A solution of cyclic hydrazine **9i** (53 mg, 155 μmol, 1.0 equiv) in 4M HCl/dioxane (2.5 mL) was stirred for 2 h at rt. The solution was concentrated *in vacuo* and dichloromethane (15 mL) and saturated NaHCO<sub>3</sub> solution (15 mL) were added. The layers were separated and the aqueous one was extracted with dichloromethane (2 × 15 mL). The combined organic layers were washed with brine, dried over MgSO<sub>4</sub>, filtered, and concentrated *in vacuo*. The crude product was dissolved anhydrous dichloromethane (2.0 mL), cooled to 0 °C, and a solution of 4-methoxybenzoyl chloride (79 mg, 0.47 mmol, 3.0 equiv) and *N,N*-diisopropylethylamine (54 μL, 0.31 mmol, 2.0 equiv) in anhydrous dichloromethane (1.0 mL) was added slowly. The reaction mixture was allowed to warm to rt then stirred for 26 h. The reaction mixture was quenched with saturated Ammonium chloride solution (10 mL) and extracted with dichloromethane (3 × 10 mL). The combined organic extracts were washed with brine (25 mL), dried over MgSO<sub>4</sub>, filtered, and concentrated *in vacuo*. The residue was purified by column chromatography (20-33% EtOAc/petroleum ether) to give **10i** as a colourless gum (49 mg, 131 μmol, 85%). *R*<sub>f</sub> = 0.22 (33% EtOAc in petroleum ether); [α]<sub>D</sub><sup>29</sup> +72.8 (*c* 0.70, CHCl<sub>3</sub>). Enantiomeric excess (91% *ee*) was determined by HPLC analysis (25 °C). [Chiralpak IA column 2-propanol/hexane = 96/4; flow rate = 1.0 mL/min; detection wavelength = 254 nm] *t*<sub>R</sub> 21.2 min; *t*<sub>R</sub> 32.2 min; IR (neat) 2932, 1660, 1590, 1470, 1434, 1301, 1248, 1171, 1027, 840, 756, 697 cm<sup>-1</sup>; <sup>1</sup>H (600 MHz; CDCl<sub>3</sub>; 233 K) Three conformers in a ratio of 66:27:7 are observed at 233 K: 8.31 (0.14H, d, *J* 4.3, Ar-*H*), 8.26 (0.47H, d, *J* 4.5, Ar-*H*), 8.00 (0.39H, d, *J* 4.5, Ar-*H*), 7.83 (0.14H, t, *J* 7.6, Ar-*H*), 7.58 (1.90H, t, *J* 7.3, Ar-*H*), 7.54-7.46 (0.88H, m, Ar-*H*), 7.45-7.41 (0.78, m, Ar-*H*), 7.41-7.29 (2.66H, m, Ar-*H*), 7.19-7.15 (1.12H, m, Ar-*H*), 6.98 (0.39H, t, *J* 7.6, Ar-*H*), 6.88 (1.07H, d, *J* 8.4, Ar-*H*), 6.83 (0.47H, d, *J* 8.5, Ar-*H*), 6.77-6.70 (1.29H, m, Ar-*H*), 6.46 (0.39H, dd, *J* 6.3, 5.7, Ar-*H*), 6.19 (0.39H, d, *J* 8.6, Ar-*H*), 6.04 (0.39H, t, *J* 5.6, NCH), 5.22 (0.47H, t, *J* 5.5, NCH), 4.80-4.73 (0.39H, m, NCHH), 4.70 (0.14H, br d, *J* 12.7, NCHH), 4.53 (0.47H, br s, NCHH), 4.46 (0.14H, d, *J* 10.9, NCH), 3.83 (1.41H, s, OCH<sub>3</sub>), 3.73 (1.18H, s, OCH<sub>3</sub>), 3.72 (0.42H, s, OCH<sub>3</sub>), 3.66 (0.47H, br s, NCHH), 3.32-3.25 (0.39H, m, NCHH), 3.04 (0.14H, t, *J* 10.7, NCHH), 2.63-2.56 (0.14H, m, CH<sub>2</sub>), 2.36-2.23 (0.82H, m, CH<sub>2</sub>), 2.24-2.11 (0.61H, m, CH<sub>2</sub>), 2.11-1.76 (2.30H, m, CH<sub>2</sub>), 1.69-1.63 (0.47H, m, CH<sub>2</sub>); <sup>13</sup>C (150 MHz; CDCl<sub>3</sub>; 233 K) Three conformers are observed at 233 K: 173.8 (C=O), 173.0 (C=O), 172.9 (C=O), 162.1 (Ar-C), 161.7 (Ar-C), 160.9 (Ar-C),



158.3 (Ar-C), 157.9 (Ar-C), 148.5 (Ar-CH), 146.6 (Ar-CH), 140.8 (Ar-C), 140.2 (Ar-C), 139.8 (Ar-C), 139.0 (Ar-CH), 136.6 (Ar-CH), 130.4 (Ar-CH), 130.1 (Ar-CH), 129.4 (Ar-CH), 128.9 (Ar-CH), 128.6 (Ar-CH), 128.2 (Ar-CH), 128.1 (Ar-CH), 127.5 (Ar-CH), 127.4 (Ar-CH), 126.9 (Ar-CH), 126.2 (Ar-CH), 126.0 (Ar-C), 125.6 (Ar-C), 115.5 (Ar-CH), 114.2 (Ar-CH), 114.1 (Ar-CH), 113.7 (Ar-CH), 112.9 (Ar-CH), 112.8 (Ar-CH), 109.0 (Ar-CH), 108.1 (Ar-CH), 107.0 (Ar-CH), 63.2 (NCH), 60.4 (NCH), 55.6 (OCH<sub>3</sub>), 55.4 (OCH<sub>3</sub>), 55.3 (OCH<sub>3</sub>), 55.0 (NCH), 46.3 (NCH<sub>2</sub>), 45.8 (NCH<sub>2</sub>), 44.2 (NCH<sub>2</sub>), 30.7 (CH<sub>2</sub>), 25.2 (CH<sub>2</sub>), 24.8 (CH<sub>2</sub>), 21.8 (CH<sub>2</sub>), 19.3 (CH<sub>2</sub>), 19.1 (CH<sub>2</sub>); HRMS (ESI<sup>+</sup>) calculated for C<sub>23</sub>H<sub>24</sub>N<sub>3</sub>O<sub>2</sub> [M+H]<sup>+</sup> 374.1863; found 374.1858.

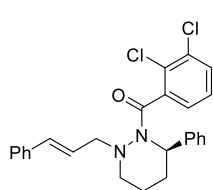

**(R)-(2-Cinnamyl-6-phenyltetrahydropyridazin-1(2H)-yl)(2,3-**

**dichlorophenyl)methanone (10k).** Cyclic hydrazine **9k** (100 mg, 0.26 mmol, 1.0 equiv) was dissolved in 4 M HCl/dioxane solution (2.0 mL) and stirred for 2 h. It was then concentrated *in vacuo* and 2,3-dichlorobenzoyl

chloride (139 mg, 0.66 mmol, 2.5 equiv) and dichloromethane (100  $\mu$ L and 2 mL) were added. The reaction mixture was cooled over an ice bath then a solution of *N,N*-diisopropylethylamine (93  $\mu$ L, 0.53 mmol, 2.0 equiv) in dichloromethane (2 mL) was added dropwise over 30 min. The mixture was allowed to warm to rt then stirred for 18 h. The mixture was then quenched with 1.0 M hydrochloric acid (5.0 mL), extracted with dichloromethane (3  $\times$  5.0 mL) and dried over magnesium sulphate. It was then concentrated *in vacuo*. and the crude product was purified by column chromatography (10% ethyl acetate in petroleum ether) to give **10k** as a clear oil (95 mg, 0.21 mmol, 80%).  $R_f$  = 0.10 (10% ethyl acetate in petroleum ether);  $[\alpha]_D^{32} +2.1$  ( $c$  0.61, CHCl<sub>3</sub>). IR (film) 2934, 2866, 1642, 1414, 970 cm<sup>-1</sup>;  $\delta H$  (500 MHz; CDCl<sub>3</sub>) 7.63 (2H, d,  $J$  7.4, Ar-H), 7.47 (1H, d,  $J$  7.2, Ar-H), 7.44 (2H, t,  $J$  7.6, Ar-H), 7.35 (1H, t,  $J$  7.3, Ar-H), 7.27-7.18 (5H, m, Ar-H), 7.09 (2H, d,  $J$  7.3, Ar-H), 6.09 (1H, d,  $J$  3.5, C=CH), 5.76 (1H, d,  $J$  15.9, C=CH), 5.43-5.33 (1H, br m, CHPh), 3.14 (1H, dd,  $J$  12.9, 7.6, NCHH), 2.90 (1H, d,  $J$  11.5, NCHHCH=CH), 2.69 (1H, d,  $J$  11.3, NCHH), 2.27-2.15 (2H, m, CHPhCHH and NCHHCH=CH), 1.69-1.50 (2H, m, CHPhCHH and CH<sub>2</sub>CHHCH<sub>2</sub>), 1.52-1.46 (1H, m, CH<sub>2</sub>CHHCH<sub>2</sub>);  $\delta C$  (125 MHz; CDCl<sub>3</sub>) 169.9 (C=O), 140.8 (Ar-C), 136.5 (Ar-C), 133.1 (Ar-C), 131.9 (C=CH) 129.6 (Ar-CH), 128.7 (Ar-CH), 128.5 (Ar-CH), 128.3 (Ar-C), 127.5 (Ar-CH), 127.4 (Ar-CH), 127.3 (Ar-CH), 127.3 (Ar-CH), 126.1 (Ar-CH), 125.5 (Ar-CH), 57.8 (CH<sub>2</sub>), 48.4 (CH), 40.8 (CH<sub>2</sub>), 24.4 (CH<sub>2</sub>), 14.0 (CH<sub>2</sub>), 1 Ar-C not seen; HRMS (ESI<sup>+</sup>) calculated for C<sub>26</sub>H<sub>24</sub>N<sub>2</sub>O<sup>35</sup>Cl<sub>2</sub> [M+Na]<sup>+</sup> 473.1158; found 473.1151.

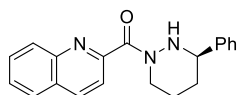

**(R)-4-(3-Phenyl-2-(quinoline-2-carbonyl)tetrahydropyridazin-1(2H)-yl)benzonitrile**

**(10l).** To a solution of cyclic hydrazine **8t** (167 mg, 0.40 mmol, 1.0 equiv)

in methanol (16 mL) was added activated magnesium turnings (5.0 equiv), and the mixture was stirred (800 rpm) for 2 h at rt. The reaction mixture was quenched with saturated ammonium chloride solution (20 mL) and extracted with dichloromethane (3 × 15 mL). The combined organic extracts were washed with brine (30 mL), dried over MgSO<sub>4</sub>, filtered, and concentrated *in vacuo*. The residue was dissolved in dichloromethane (12 mL), quinaldoyl chloride (192 mg, 1.0 mmol, 2.5 equiv) was added, and the mixture was stirred at rt for 18 h. The reaction mixture was quenched with saturated ammonium chloride solution (20 mL) and extracted with dichloromethane (3 × 15 mL). The combined organic extracts were washed with brine (30 mL), dried over MgSO<sub>4</sub>, filtered, and concentrated *in vacuo*. The crude product was purified by column chromatography (25-33% ethyl acetate in petroleum ether) to give a white solid. The product was dissolved in 4 M HCl/dioxane solution (4.0 mL) and stirred at rt for 2 h. The solvent was removed *in vacuo* and dichloromethane (15 mL) and saturated NaHCO<sub>3</sub> solution (15 mL) were added. The layers were separated and the aqueous one was extracted with dichloromethane (2 × 15 mL). The combined organic layers were washed with brine, dried over MgSO<sub>4</sub>, filtered, and concentrated *in vacuo*. The crude product was purified by column chromatography (33-50% EtOAc/petroleum ether) to give **10l** as a white solid (91 mg, 0.29 mmol, 73% over three steps). M.p. 154-156 °C; *R<sub>f</sub>* = 0.49 (50% EtOAc in petroleum ether); [ $\alpha$ ]<sub>D</sub><sup>29</sup> +22.0 (*c* 0.52, CHCl<sub>3</sub>); IR (neat) 2937, 1714, 1347, 1158, 1090, 750, 698, 665 cm<sup>-1</sup>;  $\delta$ H (600 MHz; CDCl<sub>3</sub>; 233 K) Three conformers in a ratio of 66:27:7 are observed at 233 K. Only chemical shifts for the major conformer are reported: 8.32 (1H, d, *J* 8.4, Ar-*H*), 8.13 (1H, d, *J* 8.4, Ar-*H*), 7.90 (1H, d, *J* 8.1, Ar-*H*), 7.80 (1H, d, *J* 8.8, Ar-*H*), 7.78 (1H, d, *J* 8.5, Ar-*H*), 7.65 (1H, t, *J* 7.4, Ar-*H*), 7.46 (2H, d, *J* 7.4, Ar-*H*), 7.40 (2H, t, *J* 7.4, Ar-*H*), 7.35 (1H, t, *J* 7.2, Ar-*H*), 6.77 (1H, s, NH), 4.39 (1H, d, *J* 13.0, NCHH), 4.02 (1H, d, *J* 10.4, NCH), 3.53-3.47 (1H, m, NCHH), 2.04-1.94 (2H, m, CH<sub>2</sub>CHN), 1.92-1.84 (2H, m, CH<sub>2</sub>CH<sub>2</sub>N);  $\delta$ C (150 MHz; CDCl<sub>3</sub>; 233 K) Chemical shifts for the major conformer at 233 K: 163.1 (C=O), 152.4 (Ar-C), 146.5 (Ar-C), 141.2 (Ar-C), 137.5 (Ar-CH), 130.4 (Ar-CH), 129.7 (Ar-CH), 128.6 (Ar-CH), 128.1 (Ar-CH), 128.0 (Ar-C), 127.8 (Ar-CH), 127.2 (Ar-CH), 126.9 (Ar-CH), 120.8 (Ar-CH), 62.3 (NCH), 47.0 (NCH<sub>2</sub>), 32.8 (CH<sub>2</sub>CHN), 25.2 (CH<sub>2</sub>CH<sub>2</sub>N); HRMS (ESI<sup>+</sup>) calculated for C<sub>20</sub>H<sub>19</sub>N<sub>3</sub>NaO [M+Na]<sup>+</sup> 340.1420; found 340.1417.

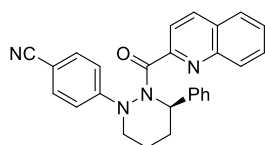

**(R)-4-(3-Phenyl-2-(quinoline-2-carbonyl)tetrahydropyridazin-**

**1(2H)-yl)benzonitrile (10m).** A solution of cyclic hydrazine **9m** (92 mg,

0.25 mmol, 1.0 equiv) in HCl/1,4-dioxane (4M, 5.0 mL) was stirred for

2 h at rt. The solvent was removed *in vacuo* and dichloromethane (15 mL) and saturated

NaHCO<sub>3</sub> solution (15 mL) were added. The layers were separated and the aqueous one was extracted with dichloromethane (2 × 15 mL). The combined organic layers were washed with brine, dried over MgSO<sub>4</sub>, filtered, and concentrated *in vacuo*. The crude product was dissolved in anhydrous dichloromethane (6.0 mL), cooled to 0 °C, and a solution of quinaldoyl chloride (144 mg, 0.75 mmol, 3.0 equiv) and *N,N*-diisopropylethylamine (88 µL, 0.50 mmol, 2.0 equiv) in anhydrous dichloromethane (2.0 mL) was added slowly. The reaction mixture was allowed to warm to rt then stirred for 16 h. The mixture was quenched with saturated Ammonium chloride solution (10 mL) and extracted with dichloromethane (3 × 10 mL). The combined organic extracts were washed with brine (25 mL), dried over magnesium sulphate, filtered, and concentrated *in vacuo*. The residue was purified by column chromatography (20-50% EtOAc/petroleum ether) to give **10m** as a pale-yellow oil (77 mg, 0.18 mmol, 73%). *R*<sub>f</sub> = 0.32 (50% EtOAc in petroleum ether); [α]<sub>D</sub><sup>25</sup> –108.2 (c 0.43, CHCl<sub>3</sub>); IR (neat) 2930, 2865, 2233, 1666, 1598, 1508, 1371, 1178, 837, 734, 703 cm<sup>-1</sup>; δ*H* (600 MHz; CDCl<sub>3</sub>; 273 K) Two main conformers in a ratio of 67:33 are observed at 273 K. Chemical shifts of the major conformer: 8.02 (1H, d, *J* 8.5, Ar-*H*), 7.96 (1H, d, *J* 8.5, Ar-*H*), 7.79-7.74 (1H, m, Ar-*H*), 7.72 (1H, d, *J* 8.1, Ar-*H*), 7.69 (1H, t, *J* 7.7, Ar-*H*), 7.55-7.50 (4H, m, Ar-*H*), 7.39 (1H, t, *J* 7.5, Ar-*H*), 7.31-7.28 (3H, m, Ar-*H*), 7.05 (2H, d, *J* 8.9, Ar-*H*), 6.32 (2H, d, *J* 8.9, Ar-*H*), 5.91 (1H, t, *J* 7.9, NCH), 4.10 (1H, dt, *J* 9.7, 4.9, NCHH), 3.70 (1H, td, *J* 9.4, 6.7, NCHH), 2.41-2.35 (1H, m, NCHCHH), 2.28-2.23 (1H, m, NCH<sub>2</sub>CHH), 2.16-2.10 (2H, m, NCHCHH, NCH<sub>2</sub>CHH); δ*C* (150 MHz; CDCl<sub>3</sub>; 273 K) Chemical shifts of the major conformer at 273 K: 171.6 (C=O), 152.8 (Ar-C), 150.9 (Ar-C), 146.5 (Ar-C), 139.7 (Ar-C), 136.8 (Ar-CH), 132.9 (Ar-CH), 130.1 (Ar-CH), 129.6 (Ar-CH), 128.7 (Ar-CH), 128.5 (Ar-CH), 128.3 (Ar-CH), 128.1 (Ar-C), 127.8 (Ar-CH), 127.6 (Ar-CH), 127.4 (Ar-CH), 120.1 (Ar-C), 119.3 (Ar-CH), 99.8 (CN), 58.5 (NCH), 48.9 (NCH<sub>2</sub>), 26.2 (NCHCH<sub>2</sub>), 19.8 (NCH<sub>2</sub>CH<sub>2</sub>); HRMS (ESI<sup>+</sup>) calculated for C<sub>27</sub>H<sub>22</sub>N<sub>4</sub>NaO [M+Na]<sup>+</sup> 441.1686; found 441.1680.

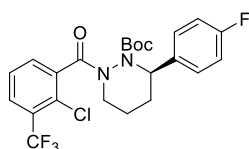

**tert-Butyl (R)-2-(2-chloro-3-(trifluoromethyl)benzoyl)-6-(4-fluorophenyl)tetrahydropyridazine-1(2H)-carboxylate (**9n**).**

To a solution of cyclic hydrazine **8v** (217 mg, 0.50 mmol, 1.0 equiv) in methanol (20 mL) was added activated magnesium turnings (5.0 equiv), and the mixture was stirred (800 rpm) for 2 h at rt. The reaction mixture was quenched with saturated ammonium chloride solution (20 mL) and extracted with dichloromethane (3 × 15 mL). The combined organic extracts were washed with brine (30 mL), dried over MgSO<sub>4</sub>, filtered, and concentrated *in vacuo*. The residue was dissolved in dichloromethane (15 mL), 2-chloro-3-(trifluoromethyl)benzoyl chloride (304 mg, 1.25 mmol, 2.5 equiv) was added, and the mixture was stirred for 18 h at rt. The reaction mixture was quenched with saturated Ammonium chloride solution (20 mL) and extracted with dichloromethane (3 × 15 mL). The combined

organic extracts were washed with brine (30 mL), dried over  $\text{MgSO}_4$ , filtered, and concentrated *in vacuo*. The crude product was purified by column chromatography (20-33% ethyl acetate in petroleum ether) to give **9n** as a colourless, viscous oil (174 mg, 0.36 mmol, 71%).  $R_f = 0.29$  (33% EtOAc in petroleum ether);  $[\alpha]_D^{29} -8.8$  (c 0.31,  $\text{CHCl}_3$ ); IR (neat) 2976, 1714, 1667, 1511, 1315, 1133, 836, 734  $\text{cm}^{-1}$ ;  $\delta H$  (600 MHz;  $\text{d}_6$ -DMSO at 373 K) Two main conformers in a ratio of 56:44 are observed at 373 K: 7.90 (0.44H, d,  $J$  7.9, Ar- $H$ ), 7.78 (0.56H, d,  $J$  7.6, Ar- $H$ ), 7.69-7.59 (1.50H, m, Ar- $H$ ), 7.53-7.44 (1.32 H, m, Ar- $H$ ), 7.13 (1.0H, t,  $J$  8.6, Ar- $H$ ), 6.88-6.77 (2.52H, m, Ar- $H$ ), 5.40 (0.44H, br. s, 2H, NCH), 5.13-5.09 (0.56H, m, NCH), 4.26-4.20 (0.56H, m,  $\text{NCH}_2$ ), 3.44-3.31 (1.24H, m,  $\text{NCH}_2$ ), 3.25 (0.48H, br s,  $\text{NCH}_2$ ), 2.29-2.19 (0.8H, m,  $\text{CH}_2$ ), 2.16-2.01 (1.9H, m,  $\text{CH}_2$ ), 1.94-1.86 (0.74H, m,  $\text{CH}_2$ ), 1.79 (0.53 H, br s,  $\text{CH}_2$ ), 1.52 (9H, s,  $(\text{CH}_3)_3$ );  $\delta C$  (150 MHz;  $\text{d}_6$ -DMSO at 373 K) Only chemical shifts for the major conformer are reported: 161.7 (C=O), 156.0 (Boc-C=O), 137.3 (Ar-C), 135.3 (Ar-C), 129.7 (Ar-CH), 128.3 (d,  $J$  7.8, Ar-CH), 127.4 (d,  $J$  8.3, Ar-CH), 126.1 (Ar-CH), 122.9 (Ar-C), 113.9 (d,  $J$  21.4, Ar-CH), 82.5 (C), 59.3 (NCH), 41.2 ( $\text{NCH}_2$ ), 27.3 ( $\text{CH}_3$ ), 23.1 ( $\text{CH}_2\text{CHN}$ ), 18.3 ( $\text{CH}_2\text{CH}_2\text{N}$ ); CF and  $\text{CF}_3$  are not observed;  $\delta F$  (376 MHz;  $\text{d}_6$ -DMSO) -61.2 ( $\text{CF}_3$ ), -116.3 (CF); HRMS (ESI<sup>+</sup>) calculated for  $\text{C}_{23}\text{H}_{23}\text{ClF}_4\text{N}_2\text{NaO}_3$   $[\text{M}+\text{Na}]^+$  509.1226; found 509.1229.

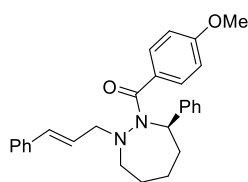

**(R)-(2-Cinnamyl-7-phenyl-1,2-diazepan-1-yl)(4-**

**methoxyphenyl)methanone (10o).** A solution of cyclic hydrazine **9o**

(140 mg, 0.36 mmol, 1.0 equiv) in HCl/dioxane (4M, 5.0 mL) was stirred

for 2 h at rt. The solvent was removed *in vacuo* and dichloromethane

(15 mL) and saturated  $\text{NaHCO}_3$  solution (15 mL) were added. The layers were separated and the aqueous one was extracted with dichloromethane (2  $\times$  15 mL). The combined organic layers were washed with brine, dried over magnesium sulphate, filtered, and concentrated *in vacuo*. The crude product was dissolved anhydrous dichloromethane (4.0 mL), cooled to 0  $^\circ\text{C}$ , and a solution of 4-methoxybenzoyl chloride (182 mg, 1.07 mmol, 3.0 equiv) and *N,N*-diisopropylethylamine (125  $\mu\text{L}$ , 0.72 mmol, 2.0 equiv) in dichloromethane (2.0 mL) was added slowly. The reaction mixture was allowed to warm to rt then stirred for 18 h. The reaction mixture was quenched with saturated Ammonium chloride solution (10 mL) and extracted with dichloromethane (3  $\times$  10 mL). The combined organic extracts were washed with brine (25 mL), dried over magnesium sulphate, filtered, and concentrated *in vacuo*. The residue was purified by column chromatography (5-10% EtOAc/toluene) to give **10o** as a colourless gum (50 mg, 0.12 mmol, 33%).  $R_f = 0.40$  (10% EtOAc in toluene);  $[\alpha]_D^{27} -2.0$  (c 0.55,  $\text{CHCl}_3$ ); Enantiomeric excess (93% ee) was determined by HPLC analysis (25  $^\circ\text{C}$ ). [Chiralpak IA column 2-propanol/hexane = 2/98; flow rate = 1.0 mL/min; detection wavelength = 254 nm]  $t_R$  55.2 min;  $t_R$  66.8 min; IR (neat) 2918, 2848,

1635, 1605, 1327, 1252, 1171, 1032, 961, 831, 763, 699  $\text{cm}^{-1}$ ;  $\delta H$  (400 MHz;  $\text{CDCl}_3$ ) Chemical shifts for the major conformer: 7.61-7.41 (1H, m, Ar-H), 7.36-7.27 (8H, m, Ar-H), 7.25-7.10 (3H, m, Ar-H), 6.86 (2H, d,  $J$  8.3, Ar-H), 6.57 (1H, d,  $J$  15.8, C=CH), 6.12 (1H, dt,  $J$  12.2, 6.3, C=CH), 4.56 (1H, dd,  $J$  8.5, 6.0, NCH), 4.38 (1H, dd,  $J$  14.0, 7.4, CHHCH), 3.90-3.84 (1H, m, CHHCH), 3.83 (3H, s,  $\text{OCH}_3$ ), 3.76-3.55 (1H, m, NCHH), 2.98 (1H, br d,  $J$  12.1, NCHH), 2.23-2.10 (1H, m, CHHCHN), 2.03-1.82 (2H, m, CHHCHN, CHHCH<sub>2</sub>CHN), 1.81-1.67 (2H, m, CHHCH<sub>2</sub>N), 1.57-1.45 (1H, m, CHHCH<sub>2</sub>CHN);  $\delta C$  (125 MHz;  $\text{CDCl}_3$ ) Chemical shifts for the major conformer: 172.2 (C=O), 160.5 (Ar-C), 143.3 (Ar-C), 137.4 (Ar-C), 132.0 (alk-CH), 130.2 (Ar-C), 128.6 (Ar-CH), 128.5 (Ar-CH), 128.41 (Ar-CH), 128.37 (Ar-CH), 127.8 (128.41 (Ar-CH), 127.4 (128.41 (Ar-CH), 127.3 (alk-CH), 126.5 (Ar-CH), 113.7 (Ar-CH), 64.7 (NCH), 59.6 ( $\text{CH}_2\text{CH}$ ), 55.4 ( $\text{OCH}_3$ ), 51.2 ( $\text{NCH}_2$ ), 36.4 ( $\text{NCHCH}_2$ ), 30.8 ( $\text{NCH}_2\text{CH}_2$ ), 25.3 ( $\text{NCHCH}_2\text{CH}_2$ ); HRMS ( $\text{ESI}^+$ ) calculated for  $\text{C}_{28}\text{H}_{30}\text{N}_2\text{NaO}_2$   $[\text{M}+\text{H}]^+$  449.2199; found 449.2201.

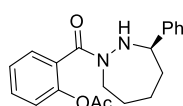

**(R)-2-(3-Phenyl-1,2-diazepane-1-carbonyl)phenyl acetate (10p).** To a

solution of cyclic hydrazine **8u** (200 mg, 0.46 mmol, 1.0 equiv) in methanol (20 mL) was added activated magnesium turnings (5.0 equiv), and the mixture was stirred vigorously for 4 h at rt. The reaction mixture was quenched with saturated ammonium chloride solution (20 mL) and extracted with dichloromethane (3  $\times$  15 mL). The combined organic extracts were washed with brine (30 mL), dried over magnesium sulphate, filtered, and concentrated *in vacuo*. The residue was dissolved in dichloromethane (15 mL), O-acetylsalicyloyl chloride (231 mg, 1.16 mmol, 2.5 equiv) was added, and the mixture was stirred at rt for 20 h. The reaction mixture was quenched with saturated ammonium chloride solution (20 mL) and extracted with dichloromethane (3  $\times$  15 mL). The combined organic extracts were washed with brine (30 mL), dried over  $\text{MgSO}_4$ , filtered, and concentrated *in vacuo*. The crude product was purified by column chromatography (20-50% ethyl acetate in petroleum ether) to give a colourless oil. The oil was dissolved in  $\text{HCl}/1,4$ -dioxane solution (4M, 5.0 mL) and stirred at rt for 2 h. The solvent was removed *in vacuo* and dichloromethane (15 mL) and saturated  $\text{NaHCO}_3$  solution (15 mL) were added. The layers were separated and the aqueous one was extracted with dichloromethane (2  $\times$  15 mL). The combined organic layers were washed with brine, dried over  $\text{MgSO}_4$ , filtered, and concentrated *in vacuo*. The crude product was purified by column chromatography (33-50% EtOAc/petroleum ether) to give **10p** as a colourless, viscous oil (84 mg, 0.25 mmol, 53% over three steps).  $R_f$  = 0.39 (50% EtOAc in petroleum ether);  $[\alpha]^{29}_D +10.5$  ( $c$  0.41,  $\text{CHCl}_3$ ); IR (film) 2933, 1766, 1626, 1403, 1198, 908, 732  $\text{cm}^{-1}$ ;  $\delta H$  (400 MHz;  $\text{CDCl}_3$ ) Two conformers in a ratio of 85:15 are observed, only chemical shifts for the major conformer are reported: 7.49 (2H, d,  $J$  7.3, Ar-H), 7.44 (1H, d,  $J$  8.2, Ar-H), 7.38-7.33 (3H, m, Ar-H), 7.29 (2H, t,  $J$  7.6, Ar-

*H*), 7.20 (1H, d, *J* 8.2, Ar-*H*), 5.61 (1H, br s, NH), 4.03 (1H, dd, *J* 10.2, 2.8, NCH), 3.48 (2H, dd, *J* 7.7, 5.4, NCH<sub>2</sub>), 2.28 (3H, s, CH<sub>3</sub>), 2.01-1.80 (5H m, CH<sub>2</sub>CHN, CH<sub>2</sub>CH<sub>2</sub>N, CHHCH<sub>2</sub>CH<sub>2</sub>N), 1.63-1.51 (1H, m, CHHCH<sub>2</sub>CH<sub>2</sub>N);  $\delta$ C (125 MHz; CDCl<sub>3</sub>) Chemical shifts for the major conformer: 169.1 (COO), 166.9 (CON), 147.2 (Ar-C), 141.9 (Ar-C), 130.5 (Ar-CH), 129.4 (Ar-C), 128.7 (Ar-CH), 127.9 (Ar-CH), 127.6 (Ar-CH), 127.4 (Ar-CH), 126.1 (Ar-CH), 123.3 (Ar-CH), 65.9 (NCH), 50.6 (NCH<sub>2</sub>), 37.8 (CH<sub>2</sub>CHN), 27.4 (CH<sub>2</sub>CH<sub>2</sub>N), 24.2 (CH<sub>2</sub>CH<sub>2</sub>CH<sub>2</sub>N), 21.1 (CH<sub>3</sub>); HRMS (ESI<sup>+</sup>) calculated for C<sub>20</sub>H<sub>22</sub>N<sub>2</sub>NaO<sub>3</sub> [M+Na]<sup>+</sup> 361.1523; found 361.1518.

### **Buchwald-Hartwig Amination Screen 2 – 48 Well Screen**

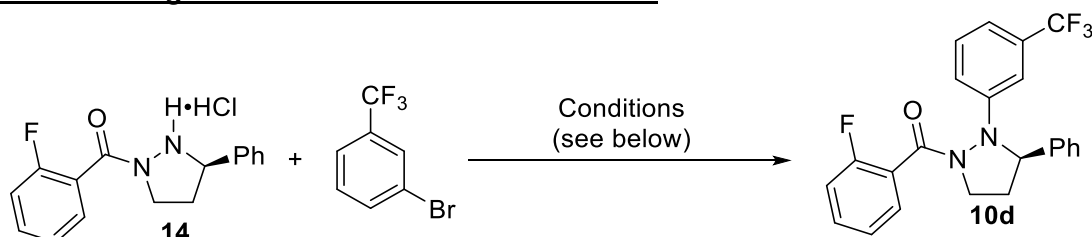

The reactions were performed in an aluminium heating block with 48 x 750  $\mu$ L vials, each with a teflon coated magnetic stirrer bar. These vials were arranged in 12 columns (labelled 1-12) and 4 rows (labelled A-D). The following powders were weighed into the vials using a Mettler Toledo QX96 powder dispenser inside a glovebox.

All vials in row A: Sodium *tert*-butoxide (4.7 mg, 49  $\mu$ mol, 3.0 equiv).

All vials in rows B, F: Caesium carbonate (15.9 mg, 49  $\mu$ mol, 3.0 equiv).

All vials in rows C, G: Potassium carbonate (6.8 mg, 49  $\mu$ mol, 3.0 equiv).

All vials in rows D, H: Potassium phosphate tribasic (10.4 mg, 49  $\mu$ mol, 3.0 equiv).

All vials in column 1: [XantPhos Pd(allyl)]Cl (1.2 mg, 1.6  $\mu$ mol, 0.1 equiv).

All vials in column 2: [(*R*)-BINAP Pd(allyl)]Cl (1.4 mg, 1.6  $\mu$ mol, 0.1 equiv).

All vials in column 3: Pd(dppf)Cl<sub>2</sub> · Dichloromethane (1.3 mg, 1.6  $\mu$ mol, 0.1 equiv).

All vials in column 4: [P(*t*Bu)<sub>3</sub>] Pd(crotyl) Cl (0.7 mg, 2.0  $\mu$ mol, 0.12 equiv).

All vials in column 5: [BippyPhos Pd(allyl)]OTf (1.3 mg, 1.6  $\mu$ mol, 0.1 equiv)

All vials in column 6: AdBettPhos (1.3 mg, 2.0  $\mu$ mol, 0.12 equiv) and palladium (II) acetate (0.5 mg, 2.2  $\mu$ mol, 0.1 equiv).

All vials in column 7: [*t*BuBrettPhos Pd(allyl)]OTf (1.3 mg, 1.7  $\mu$ mol, 0.1 equiv).

All vials in column 8: MorDalPhos (0.9 mg, 2.0  $\mu$ mol, 0.12 equiv) and palladium (II) acetate (0.5 mg, 2.2  $\mu$ mol, 0.1 equiv).

All vials in column 9: [BrettPhos Pd(crotyl)]OTf (1.4 mg, 1.7  $\mu$ mol, 0.1 equiv).

All vials in column 10: [*t*BuXPhos Pd(allyl)]OTf (1.2 mg, 1.7  $\mu$ mol, 0.1 equiv).

All vials in column 11: XPhos Pd(crotyl)Cl (1.1 mg, 1.6  $\mu$ mol, 0.1 equiv).

All vials in column 12: RuPhos Pd(crotyl)Cl (1.1 mg, 1.7  $\mu$ mol, 0.1 equiv).

Stock Solution: (2-Fluorophenyl)-[(3*R*)-3-phenylpyrazolidin-1-yl]methanone hydrochloride (**14**) (258 mg, 0.78 mmol) and 3-bromobenzotrifluoride (265 mg, 164  $\mu$ L, 1.18 mmol) in toluene (3.60 mL).

All vials were dosed with 75  $\mu$ L of Stock Solution which contained (2-fluorophenyl)-[(3*R*)-3-phenylpyrazolidin-1-yl]methanone hydrochloride (**14**) (5.4 mg, 16  $\mu$ mol, 1.0 equiv) and 3-bromobenzotrifluoride (5.5 mg, 34  $\mu$ L, 25  $\mu$ mol, 1.5 equiv).

N.B. **14** was obtained by stirring **9d** (1 g) in HCl/dioxane solution (10 mL) for 2 h. This solution was then concentrated in vacuo to give **14** as a pale yellow solid which was used in the screen without further purification.

The plate was sealed with a silicone and PFA mat and placed on an HEL polyblock. The plate was then heated at 90 °C for 16 h. The vials were then cooled to rt and DMSO (300  $\mu$ L) was added to each using a multichannel pipette. A 5  $\mu$ L aliquot was extracted from each then added to a 96-well analytical plate and diluted with DMSO (50  $\mu$ L). The plate was analyzed by reverse phase LCMS (XBridge C<sub>18</sub> 3.5- $\mu$ m 2.1  $\times$  35 mm Column, 1.6 mL min<sup>-1</sup>, 50 °C; gradient 5:95 to 99:1 (pH 9 H<sub>2</sub>O + 10 mM NH<sub>4</sub>HCO<sub>2</sub>) / MeCN over 0.7 min + 0.3 min hold). The LCMS traces were processed using in-house software and the results visualized using Spotfire software to give Figure S2:

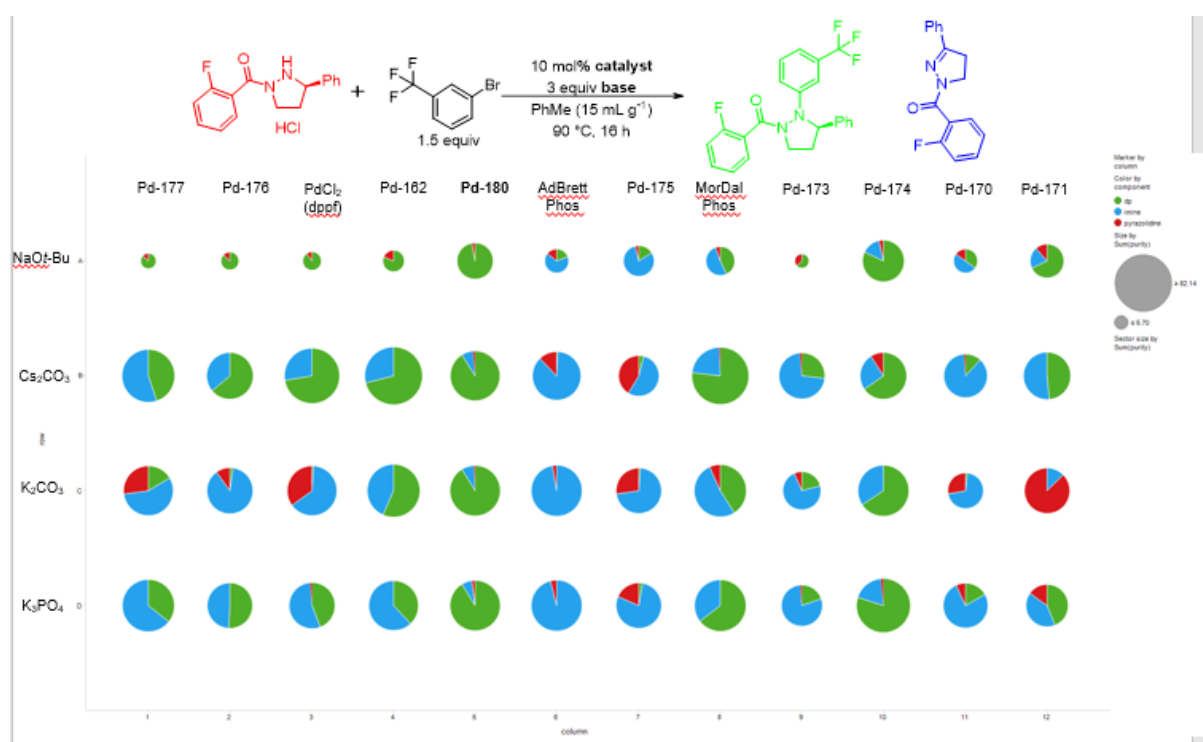

Figure S2 High throughput screening of the Buchwald-Hartwig coupling of **14**

#### **General method 6: Buchwald-Hartwig Amination with Pd-180**

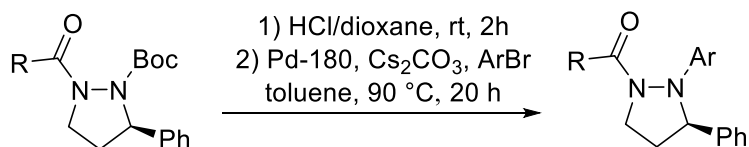

The cyclic hydrazine was dissolved in HCl/dioxane solution (4M, 2.0 mL) and stirred for 2 h at rt. It was then concentrated *in vacuo*. To this was added Pd-180 (0.05 equiv), caesium carbonate (3.0 equiv), aryl bromide (1.5 equiv) and toluene (1.0 M), and the solution was stirred at 90 °C for 20 h. The reaction mixture was then quenched with saturated ammonium chloride solution (5.0 mL), extracted with dichloromethane (3 x 5.0 mL) and dried over magnesium sulphate. It was then concentrated *in vacuo* and the crude product was purified by column chromatography (15-25% ethyl acetate in petroleum ether) to give the following compounds.

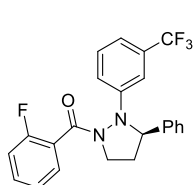

**(R)-(2-Fluorophenyl)(3-phenyl-2-(3-(trifluoromethyl)phenyl)pyrazolidin-**

**1-yl)methanone (10d).** Following general method 6, cyclic hydrazine **9d**

(26 mg, 70  $\mu$ mol, 1.0 equiv), with Pd-180 (3 mg, 4  $\mu$ mol, 0.05 equiv), caesium carbonate (68 mg, 0.21 mmol, 3.0 equiv), 3-bromobenzotrifluoride (15  $\mu$ L, 0.11 mmol, 1.5 equiv) and toluene (70  $\mu$ L) gave **10d** as a clear oil (21 mg, 54  $\mu$ mol, 77%).  $R_f$  = 0.15 (15% ethyl acetate in petroleum ether);  $[\alpha]^{32}_D$  -8.5 (*c* 0.14, CHCl<sub>3</sub>); Enantiomeric excess (94% ee) was determined by HPLC analysis (25 °C). [Chiralpak IA column 2-propanol/hexane = 1/99; flow rate = 1.0 mL/min; detection wavelength = 254 nm]  $t_R$  33.9 min;  $t_R$  37.8 min; IR (film) 2925, 1659, 1491, 1382, 1211 cm<sup>-1</sup>;  $\delta H$  (500 MHz; d6-DMSO at 373 K) 7.60-7.03 (13H, m, Ar-H), 5.04 (1H, t, *J* 5.5, CHPh), 4.09-3.87 (1H, br m, NCHH), 3.65 (1H, dd, *J* 17.3, 8.9, NCHH), 2.68-2.58 (1H, br m, CHPhCHH), 2.34-2.22 (1H, br m, CHPhCHH);  $\delta C$  (125 MHz, d6-DMSO at 373 K) 159.7 (C=O), 157.8 (Ar-C), 145.7 (Ar-CH), 132.2 (Ar-CH), 130.5 (q, *J* 31.3, Ar-C), 130.5 (Ar-CH), 129.0 (Ar-CH), 127.9 (Ar-CH), 126.8 (Ar-CH), 124.6 (q, *J* 271, CF<sub>3</sub>), 124.5 (d, *J* 15, Ar-C), 116.2 (d, *J* 23, Ar-CH), 2 CH<sub>2</sub>, 1 CH and 4 Ar-CH not seen;  $\delta F$  (276 MHz; d6-DMSO) -61.1 (minor), -61.4 (CF<sub>3</sub>), -114.7 (minor), -115.1 (Ar-CF); HRMS (ESI<sup>+</sup>) calculated for F<sub>4</sub>C<sub>23</sub>H<sub>18</sub>N<sub>2</sub>O [M+Na]<sup>+</sup> 437.1247; found 437.1248.

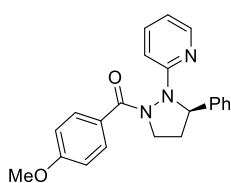

**(R)-(4-Methoxyphenyl)(3-phenyl-2-(pyridin-2-yl)pyrazolidin-1-**

**yl)methanone (10g).** Following general method 6, cyclic hydrazine **9g**

(25 mg, 65  $\mu$ mol, 1.0 equiv), with Pd-180 (3 mg, 3  $\mu$ mol, 0.05 equiv), caesium carbonate (64 mg, 0.20 mmol, 3.0 equiv), 2-bromopyridine (9  $\mu$ L, 0.10 mmol, 1.5 equiv) and toluene (65  $\mu$ L) gave **10g** as a clear oil (19 mg, 52  $\mu$ mol, 80%).  $R_f$  = 0.13 (33% ethyl acetate in petroleum ether);  $[\alpha]^{32}_D$  +9.2 (*c* 0.23, dichloromethane).



IR (film) 2932, 1651, 1597, 1461, 1432, 1258, 1173  $\text{cm}^{-1}$ ;  $\delta H$  (400 MHz;  $\text{CDCl}_3$ ) 8.32 (1H, s, Ar-CH), 7.60 (1H, t,  $J$  7.3, Ar-H), 7.53-6.87 (9H, m, Ar-H), 6.69 (1H, s, Ar-H), 5.88 (1H, t,  $J$  7.5,  $\text{CHPh}$ ), 4.70-3.39 (1H, br m,  $\text{NCHH}$ ), 3.76 (3H, s,  $\text{CH}_3$ ), 3.52-3.49 (1H, br m,  $\text{NCHH}$ ), 2.53-2.31 (2H, br m,  $\text{CHPhCH}_2$ );  $\delta C$  (100 MHz;  $\text{CDCl}_3$ ) 161.5 (C=O), 148.4 (Ar-C), 138.2 (Ar-C), 130.3 (Ar-CH), 128.4 (Ar-CH), 127.2 (Ar-CH), 126.7 (Ar-CH), 117.5 (Ar-CH), 113.0 (Ar-CH), 109.1 (Ar-CH), 66.1 (CH), 55.2 ( $\text{CH}_3$ ), 44.7 ( $\text{CH}_2$ ), 2 Ar-C, 2 Ar-CH and 1  $\text{CH}_2$  not seen; HRMS (ESI<sup>+</sup>) calculated for  $\text{C}_{22}\text{H}_{21}\text{N}_3\text{O}_2$   $[\text{M}+\text{H}]^+$  360.1712; found 360.1712.

### **General method 7: Buchwald-Hartwig Amination with $\text{Pd}(\text{OAc})_2$ and Xantphos**

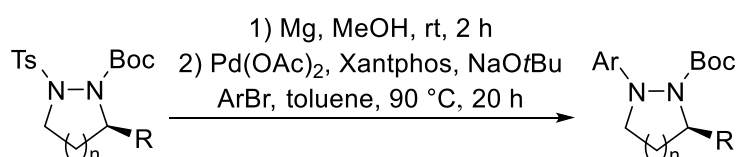

N.B. Magnesium turnings were activated by washing them with 1.0 M hydrochloric acid solution (2 × 20 mL), water (20 mL) and methanol (20 mL).

To a solution of cyclic hydrazine in methanol (0.1 M) was added activated magnesium turnings (5.0 equiv), and the mixture was stirred vigorously (800 rpm) for 2 h at rt. The reaction mixture was quenched with saturated ammonium chloride solution (10 mL) and extracted with dichloromethane (3 × 5 mL). The combined organic extracts were washed with brine (30 mL), dried over  $\text{MgSO}_4$ , filtered, and concentrated *in vacuo*. The residue was dissolved in toluene (1.0 M), and palladium acetate (5-10 mol%), Xantphos (10-20 mol%), sodium *tert*-butoxide (2.0 equiv) and aryl bromide (1.5 equiv) were added and the solution was stirred at 90 °C for 20 h. The reaction mixture was then quenched with saturated ammonium chloride solution (5 mL), extracted with dichloromethane (3 × 5 mL), dried over magnesium sulphate and then concentrated *in vacuo*. The crude product was purified by column chromatography (15-25% ethyl acetate in petroleum ether) to give the following compounds.

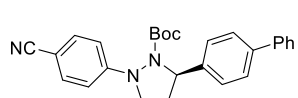

***tert*-Butyl**

**(*R*)-5-([1,1'-biphenyl]-4-yl)-2-(4-**

**cyanophenyl)pyrazolidine-1-carboxylate (**9h**).** Following general

method 7, **8k** (40 mg, 0.12 mmol, 1.0 equiv), magnesium turnings (15 mg, 0.60 mmol, 5.0 equiv) and methanol (1.2 mL, 0.1 M), then palladium acetate (3 mg, 12  $\mu\text{mol}$ , 0.1 equiv), Xantphos (14 mg, 25  $\mu\text{mol}$ , 0.2 equiv), sodium *tert*-butoxide (24 mg, 0.25 mmol, 2.0 equiv) and 4-bromobenzonitrile (45 mg, 0.25 mmol, 2.0 equiv) in toluene (0.12 mL, 1.0 M) yielded **9h** as a clear oil (45 mg, 0.11 mmol, 86%).  $R_f$  = 0.23 (25% ethyl acetate in petroleum ether);  $[\alpha]_D^{32}$  -10.7 ( $c$  0.42,  $\text{CHCl}_3$ ); IR (film) 2977, 2928, 2218, 1705, 1603, 1509, 1338, 1142  $\text{cm}^{-1}$ ;

$\delta$ H (500 MHz; CDCl<sub>3</sub>) 7.48 (4H, dd, *J* 8.0, 4.8, Ar-H), 7.44 (2H, d, *J* 8.2, Ar-H), 7.35 (2H, t, *J* 7.6, Ar-H), 7.27 (1H, t, *J* 7.4, Ar-H), 7.21 (2H, d, *J* 8.2, Ar-H), 6.86 (2H, d, *J* 8.8, Ar-H), 5.26 (1H, t, *J* 6.9, CHPh), 3.77-3.70 (1H, m, NCHH), 3.66 (1H, dt, *J* 10.5, 7.4, NCHH), 2.53 (1H, td, *J* 12.5, 7.1, CHPhCHH), 2.23-2.12 (1H, m, CHPhCHH), 1.36 (9H, s, C(CH<sub>3</sub>)<sub>3</sub>);  $\delta$ C (125 MHz; CDCl<sub>3</sub>) 152.8 (C=O), 140.5 (Ar-C), 139.8 (Ar-C), 133.2 (Ar-C), 128.8 (Ar-CH), 127.4 (Ar-CH), 127.3 (Ar-CH), 127.0 (Ar-CH), 127.0 (Ar-CH), 126.6 (Ar-C), 126.6 (Ar-CH), 119.9 (Ar-C), 114.2 (Ar-CH), 102.1 (CN), 82.3 (C), 62.8 (CH), 50.6 (CH<sub>2</sub>), 35.1 (CH<sub>2</sub>), 28.2 (CH<sub>3</sub>); HRMS (ESI<sup>+</sup>) calculated for C<sub>27</sub>H<sub>27</sub>N<sub>3</sub>O<sub>2</sub> [M+Na]<sup>+</sup> 448.1995; found 448.1999.

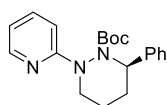

**tert-Butyl (R)-6-phenyl-2-(pyridin-2-yl)tetrahydropyridazine-1(2H)-carboxylate (9i).** Following general method 7, **8t** (208 mg, 0.50 mmol, 1.0 equiv), methanol (20 mL, 0.1 M), activated magnesium turnings (61

mg, 2.50 mmol, 5.0 equiv), then toluene (1.0 mL, 0.5 M), palladium acetate (5.6 mg, 25  $\mu$ mol, 5 mol%), Xantphos (29 mg, 50  $\mu$ mol, 10 mol%), sodium *tert*-butoxide (96 mg, 1.0 mmol, 2.0 equiv), and 2-bromopyridine (95  $\mu$ L, 1.0 mmol, 2.0 equiv) yielded **9i** as an off-white solid (113 mg, 0.33 mmol, 67%). M.p. 72-74 °C; *R*<sub>f</sub> = 0.23 (20% EtOAc in petroleum ether); [ $\alpha$ ]<sub>D</sub><sup>29</sup> +68.8 (*c* 0.53, CHCl<sub>3</sub>). Enantiomeric excess (91% *ee*) was determined by HPLC analysis (25 °C). [Chiralpak OD-H column 2-propanol/hexane = 0.8/99.2; flow rate = 1.0 mL/min; detection wavelength = 254 nm] *t*<sub>R</sub> 6.7 min; *t*<sub>R</sub> 7.3 min; IR (neat) 2967, 2876, 1591, 1476, 1439, 1299, 1153, 1075, 1044, 877, 766, 701 cm<sup>-1</sup>;  $\delta$ H (500 MHz; CDCl<sub>3</sub>) 8.11 (1H, d, *J* 4.4, Ar-H), 7.40 (2H, d, *J* 7.4, Ar-H), 7.34 (1H, ddd, *J* 8.5, 7.0, 1.3, Ar-H), 7.28 (2H, d, *J* 7.2, Ar-H), 7.22 (1H, t, *J* 7.2, Ar-H), 6.57 (2H, dd, *J* 6.9, 5.3, Ar-H), 5.40 (1H, br s, NCH), 4.42 (1H, br s, NCHH), 3.33 (1H, br s, NCHH), 2.10-2.00 (3H, m, CH<sub>2</sub>CHN, CHHCH<sub>2</sub>N), 1.67-1.60 (1H, m, CHHCH<sub>2</sub>N), 1.31 (9H, s, (CH<sub>3</sub>)<sub>3</sub>);  $\delta$ C (125 MHz; CDCl<sub>3</sub>) 159.5 (Ar-C), 147.0 (Ar-CH), 141.3 (Ar-C), 136.9 (Ar-CH), 128.5 (Ar-CH), 127.4 (Ar-CH), 127.3 (Ar-CH), 113.5 (Ar-CH), 107.8 (Ar-CH), 81.6 (C), 59.1 (NCH), 43.5 (NCH<sub>2</sub>), 28.2 (Boc-CH<sub>3</sub>), 27.3 (CH<sub>2</sub>CHN), 20.0 (CH<sub>2</sub>CH<sub>2</sub>N), Boc C=O not observed; HRMS (ESI<sup>+</sup>) calculated for C<sub>20</sub>H<sub>26</sub>N<sub>3</sub>O<sub>2</sub> [M+H]<sup>+</sup> 340.2020; found 340.2023.

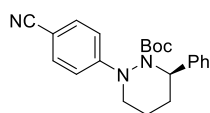

**tert-Butyl (R)-2-(4-cyanophenyl)-6-phenyltetrahydropyridazine-1(2H)-carboxylate (9m).** Following general method 7, **8t** (208 mg, 0.50 mmol, 1.0 equiv), methanol (20 mL, 0.1 M), activated magnesium turnings (61 mg,

2.50 mmol, 5.0 equiv), then toluene (1.0 mL, 0.5 M), palladium acetate (5.6 mg, 25  $\mu$ mol, 5 mol%), Xantphos (29 mg, 50  $\mu$ mol, 10 mol%), sodium *tert*-butoxide (96 mg, 1.0 mmol, 2.0 equiv), and 4-bromobenzonitrile (182 mg, 1.0 mmol, 2.0 equiv) gave **9m** as a colourless oil that crystallised upon standing to an off-white solid (104 mg, 0.29 mmol, 57%). M.p. 124-125 °C; *R*<sub>f</sub> = 0.19 (20% EtOAc in petroleum ether); [ $\alpha$ ]<sub>D</sub><sup>25</sup> +123.5 (*c* 0.08, CHCl<sub>3</sub>); IR (neat)

2977, 2860, 2227, 1704, 1606, 1297, 1168, 835, 714  $\text{cm}^{-1}$ ;  $\delta H$  (400 MHz;  $\text{CDCl}_3$ ) 7.40 (2H, d,  $J$  8.9, Ar- $H$ ), 7.38-7.34 (2H, m, Ar- $H$ ), 7.33-7.27 (3H, m, Ar- $H$ ), 6.64 (2H, d,  $J$  8.8, Ar- $H$ ), 5.35 (1H, br s, NCH), 3.67 (1H, dd,  $J$  16.6, 9.1, NCHH), 3.49 (1H, br s, NCHH), 2.17-2.05 (2H, m, CHHCHN, CHHCH<sub>2</sub>N), 1.93 (1H, dd,  $J$  21.6, 10.8, CHHCHN), 1.70-1.63 (1H, m, CHHCH<sub>2</sub>N), 1.26 (9H, br s,  $(\text{CH}_3)_3$ );  $\delta C$  (125 MHz;  $\text{CDCl}_3$ ) 155.6 (Boc C=O), 152.3 (Ar-C), 141.2 (Ar-C), 133.3 (Ar-CH), 128.7 (Ar-CH), 127.8 (Ar-CH), 127.21 (Ar-CH), 120.4 (Ar-C), 111.5 (Ar-CH), 100.1 (CN), 82.1 (C), 60.1 (NCH), 45.8 (NCH<sub>2</sub>), 28.2 (Boc-CH<sub>3</sub>), 27.0 (CH<sub>2</sub>CHN), 20.1 (CH<sub>2</sub>CH<sub>2</sub>N); HRMS (ESI<sup>+</sup>) calculated for  $\text{C}_{22}\text{H}_{25}\text{N}_3\text{NaO}_2$   $[\text{M}+\text{Na}]^+$  386.1839; found 386.1837.

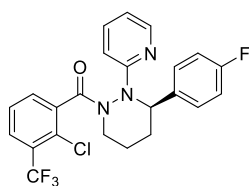

**(R)-2-Chloro-3-(trifluoromethyl)phenyl(3-(4-fluorophenyl)-2-(pyridin-2-yl)tetrahydropyridazin-1(2H)-yl)methanone (10n).**

A solution of cyclic hydrazine **9n** (80 mg, 165  $\mu\text{mol}$ , 1.0 equiv) in 4 M HCl/dioxane (2.5 mL) was stirred for 2 h at rt. The solvent was removed *in vacuo* and dichloromethane (15 mL) and saturated  $\text{NaHCO}_3$  solution (15 mL) were added. The layers were separated and the aqueous one was extracted with dichloromethane (2  $\times$  15 mL). The combined organic layers were washed with brine, dried over  $\text{MgSO}_4$ , filtered, and concentrated *in vacuo*. The crude product was dissolved anhydrous toluene (1.0 mL),  $\text{Pd}(\text{OAc})_2$  (3.7 mg, 16.5  $\mu\text{mol}$ , 10 mol%), Xantphos (19 mg, 33  $\mu\text{mol}$ , 20 mol%), sodium *tert*-butoxide (32 mg, 0.33 mmol, 2.0 equiv), and 2-bromopyridine (31  $\mu\text{L}$ , 0.33 mmol, 2.0 equiv) were added and the reaction mixture was stirred at 90  $^\circ\text{C}$  for 18 h. The mixture was cooled to rt, then quenched with saturated Ammonium chloride solution (10 mL) and extracted with dichloromethane (3  $\times$  10 mL). The combined organic extracts were washed with brine (25 mL), dried over  $\text{MgSO}_4$ , filtered, and concentrated *in vacuo*. The residue was purified by column chromatography (33-50% ethyl acetate in petroleum ether) to give **10n** as a pale-yellow oil (38 mg, 82  $\mu\text{mol}$ , 50%).  $R_f$  = 0.42 (50% EtOAc in petroleum ether);  $[\alpha]_D^{29}$  –57.9 ( $c$  0.12,  $\text{CHCl}_3$ ); IR (neat) 2916, 1659, 1588, 1510, 1467, 1432, 1316, 1222, 1132, 1090, 808, 765, 730, 673  $\text{cm}^{-1}$ ;  $\delta H$  (600 MHz;  $\text{CDCl}_3$ ) Only chemical shifts for the major conformer are reported: 8.33 (1H, d,  $J$  4.5, Ar- $H$ ), 7.72-7.69 (2H, m, Ar- $H$ ), 7.55 (1H, d,  $J$  7.8, Ar- $H$ ), 7.12 (1H, br s, Ar- $H$ ), 6.96-6.90 (2H, m, Ar- $H$ ), 6.82-6.78 (2H, m, Ar- $H$ ), 6.69 (2H, t,  $J$  8.4, Ar- $H$ ), 5.62 (1H, s, NCH), 4.60 (1H, dt,  $J$  13.0, 7.8, NCHH), 3.59-3.50 (1H, m, NCHH), 2.27-2.22 (1H, m, CHH), 2.20-2.14 (1H, m, CHH), 2.13-2.07 (1H, m, CHH), 1.63-1.56 (1H, m, CHH);  $\delta C$  (125 MHz;  $\text{CDCl}_3$ ) 169.5 (C=O), 162.1 (d,  $J$  246.0, CF), 160.3 (Ar-C), 148.9 (Ar-CH), 138.5 (d,  $J$  9.0, Ar-CH), 138.0 (Ar-C), 136.1 (Ar-C), 128.1 (d,  $J$  8.0, Ar-CH), 125.7 (Ar-CH), 123.9 (Ar-CH), 122.5 (q,  $J$  273.5,  $\text{CF}_3$ ), 121.3 (Ar-CH), 117.0 (Ar-CH), 115.0 (d,  $J$  21.5, Ar-CH), 108.1 (Ar-CH), 60.6 (NCH), 40.4 (NCH<sub>2</sub>), 23.7 (CH<sub>2</sub>NCH), 19.5 (CH<sub>2</sub>NCH<sub>2</sub>), 2 Ar-C not seen;  $\delta F$  (282 MHz;  $\text{CDCl}_3$ ) –61.5 ( $\text{CF}_3$ ), –116.1 (CF); HRMS (ESI<sup>+</sup>) calculated for  $\text{C}_{23}\text{H}_{18}\text{ClF}_4\text{N}_3\text{NaO}$   $[\text{M}+\text{Na}]^+$  486.0967; found 486.0963.

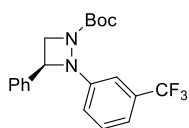

**tert-Butyl (S)-3-phenyl-2-(3-(trifluoromethyl)phenyl)-1,2-diazetidene-1-carboxylate (9q).**

Following general method 7, cyclic hydrazine **8b** (100 mg, 0.26 mmol, 1.0 equiv), magnesium turnings (31 mg, 1.29 mmol, 5.0 equiv) and methanol (5.0 mL) then palladium acetate (6.0 mg, 26  $\mu$ mol, 0.1 equiv), Xantphos (30 mg, 51  $\mu$ mol, 0.2 equiv), sodium *tert*-butoxide (49 mg, 0.51 mmol, 2.0 equiv), 3-trifluoromethyl-bromobenzene (71  $\mu$ L, 0.51 mmol, 2.0 equiv) and toluene (5.0 mL) yielded **9q** as an orange oil (35 mg, 90  $\mu$ mol, 35%).  $R_f$  = 0.78 (25% EtOAc/petroleum ether);  $[\alpha]^{24}_D$  +4.6 (*c* 0.23,  $\text{CHCl}_3$ ); IR (film) 2978, 1715, 1327, 1120, 1028  $\text{cm}^{-1}$ ;  $\delta H$  (500 MHz;  $\text{CDCl}_3$ ) 7.56 (2H, d,  $J$  7.3, Ar-H), 7.48 (2H, t,  $J$  7.5, Ar-H), 7.42 (1H, d,  $J$  7.2, Ar-H), 7.33 (1H, t,  $J$  7.9, Ar-H), 7.22 (1H, d,  $J$  7.7, Ar-H), 7.15 (1H, s, Ar-H), 6.94 (1H, d,  $J$  8.6, Ar-H), 4.94 (1H, t,  $J$  8.4, CHPh), 4.58 (1H, t,  $J$  8.5, NCHH) 4.10 (1H, t,  $J$  7.6, NCHH), 1.56 (9H, s,  $\text{C}(\text{CH}_3)_3$ );  $\delta C$  (125 MHz;  $\text{CDCl}_3$ ) 161.1 (C=O), 153.6 (Ar-C), 139.1 (Ar-C), 130.9 (q,  $J$  31.3, Ar-C), 129.1 (Ar-CH), 129.0 (Ar-CH), 128.7 (Ar-CH), 126.7 (Ar-CH), 124.1 (q,  $J$  271.3,  $\text{CF}_3$ ), 118.4 (q,  $J$  3.8, Ar-CH), 117.4 (Ar-CH), 111.3 (q,  $J$  5.0, Ar-CH), 82.5 (C), 67.7 (CH), 56.8 ( $\text{CH}_2$ ), 28.2 ( $\text{CH}_3$ );  $\delta F$  (376 MHz;  $\text{CDCl}_3$ ) -62.8 ( $\text{CF}_3$ ); HRMS (ESI<sup>+</sup>) calculated for  $\text{C}_{20}\text{H}_{21}\text{N}_2\text{O}_2\text{F}_3$   $[\text{M}+\text{Na}]^+$  401.1447; found 401.1450.

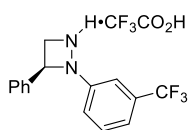

**(S)-4-Phenyl-1-(3-(trifluoromethyl)phenyl)-1,2-diazetidene trifluoroacetic acid (10q).**

Cyclic hydrazine **9q** (14 mg, 38  $\mu$ mol, 1.0 equiv), trifluoroacetic acid (30  $\mu$ L, 0.38 mmol, 10.0 equiv) and dichloromethane (1.0 mL) were stirred at rt for 2 h then concentrated *in vacuo* to yield **10q** as an orange oil (13 mg, 33  $\mu$ mol, 88%).  $[\alpha]^{24}_D$  -4.8 (*c* 0.36,  $\text{CHCl}_3$ ); IR (film) 2920, 2852 1759, 1460, 1232, 1032  $\text{cm}^{-1}$ ;  $\delta H$  (500 MHz;  $\text{CDCl}_3$ ) 7.46-7.37 (6H, m, Ar-H), 7.20 (1H, d,  $J$  7.6, Ar-H), 7.05 (1H, s, Ar-H), 6.99 (1H, d,  $J$  8.1, Ar-H), 5.69 (1H, t,  $J$  8.0, CHPh), 4.20 (1H, t,  $J$  8.3, NCHH), 3.73 (1H, t,  $J$  8.3, NCHH),  $\delta C$  (125 MHz;  $\text{CDCl}_3$ ) 146.4 (Ar-C), 137.1 (Ar-C), 130.0 (Ar-CH), 129.4 (Ar-CH), 129.1 (Ar-CH), 125.7 (Ar-CH), 118.2 (q,  $J$  3.8, Ar-CH), 116.4 (Ar-CH), 109.7 (q,  $J$  2.5, Ar-CH), 74.5 (CH), 53.9 ( $\text{CH}_2$ ), 28.2 ( $\text{CH}_3$ ), 1 C=O, 2  $\text{CF}_3$  and 1 Ar-C not seen;  $\delta F$  (376 MHz;  $\text{CDCl}_3$ ) -62.9 ( $\text{CF}_3$ ), -70.8 and -70.9 (1:1 rotamer,  $\text{CF}_3\text{CO}_2\text{H}$ ); HRMS (ESI<sup>+</sup>) calculated for  $\text{C}_{15}\text{H}_{13}\text{N}_2\text{F}_3$   $[\text{M}+\text{Na}]^+$  301.0929; found 301.0930.

### HPLC Profiles of 6a-v, 8a-v, 10b, 10d, 10i and 10o

HPLC analysis was conducted on an Agilent Technologies 1200 Series HPLC, using a ratio of HPLC grade hexane and propan-2-ol as the eluent, and detection by UV at 254 nm. *Racemic* traces were produced by NaBH<sub>4</sub>-mediated reduction of the corresponding ketone or mixing of equal quantities of the *R* and *S* enantiomers.

The HPLC profiles of **6h**, **6i**, **6k**, **6r**, and **6s** were not determined, the data for the corresponding hydrazines (**8h**, **8i**, **8k**, **8r**, and **8s**) were used to determine the expected enantiomeric excesses of these compounds.

#### HPLC profile of 6a

Chiralpak AD-H column (0.46 cm ø x 25 cm), 85:15 hexane:propan-2-ol, T = 25°C, flow rate = 1.0 mL/min.

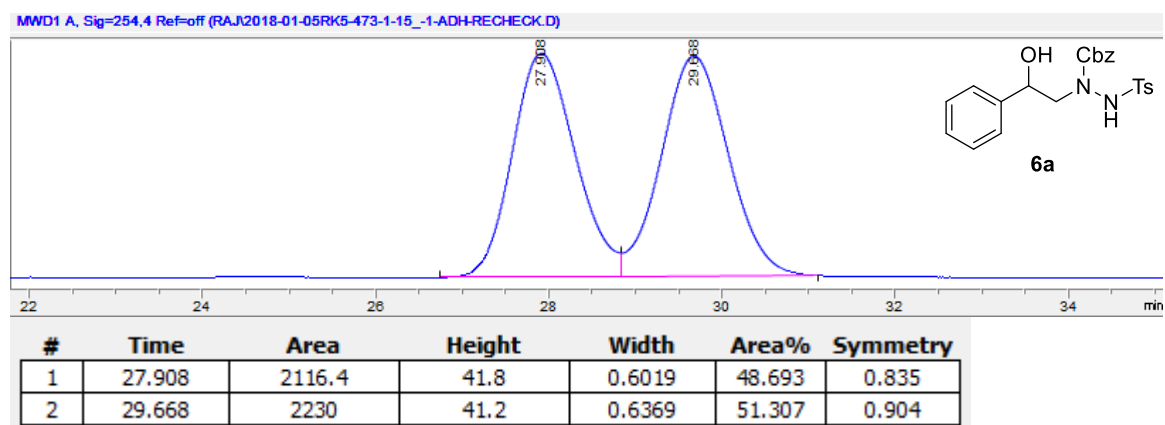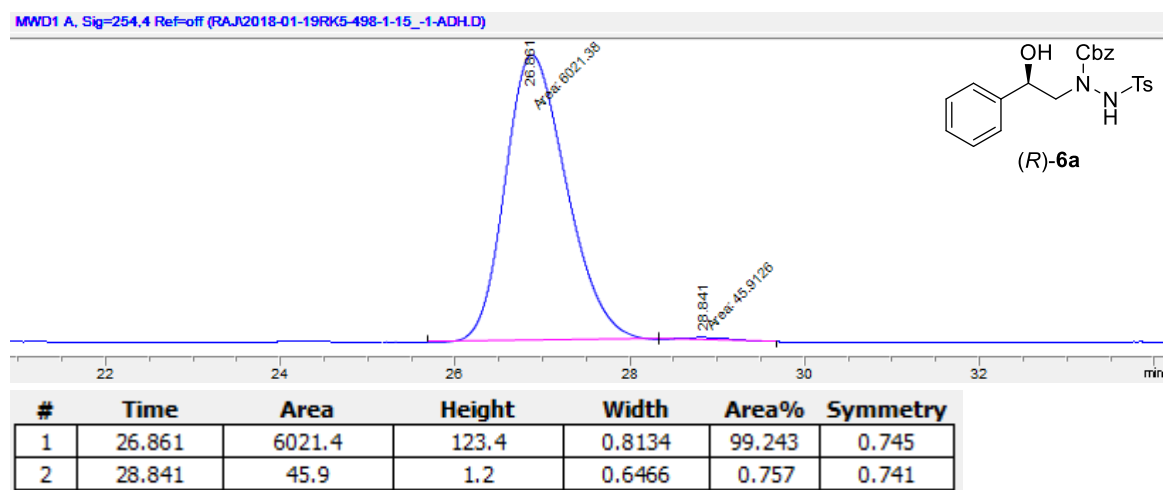

## HPLC Trace of **6b**

Chiralpak IA column (0.46 cm ø x 25 cm) 98.5:1.5 hexane:propan-2-ol, T = 25 °C, flow rate = 1.0 mL/min.

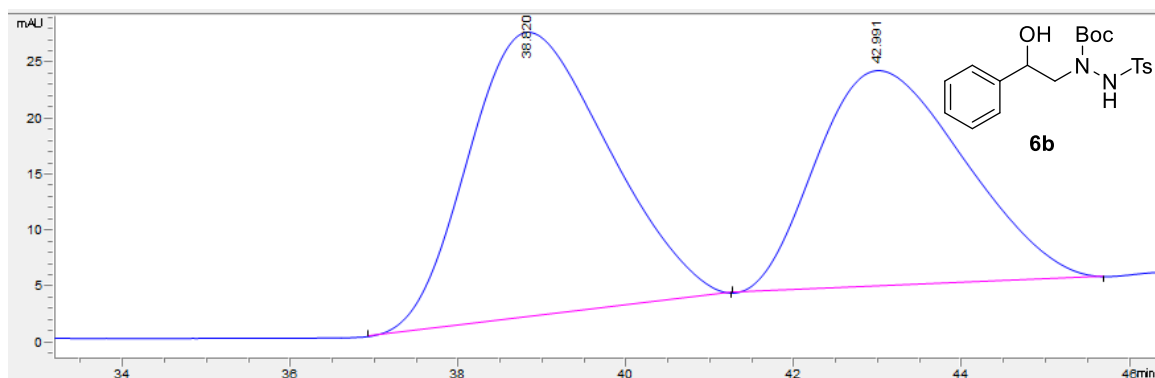

| # | Time   | Area   | Height | Width  | Area%  | Symmetry |
|---|--------|--------|--------|--------|--------|----------|
| 1 | 38.82  | 2943.5 | 25.5   | 1.5475 | 55.505 | 0.71     |
| 2 | 42.991 | 2359.6 | 19.3   | 1.4556 | 44.495 | 0.708    |

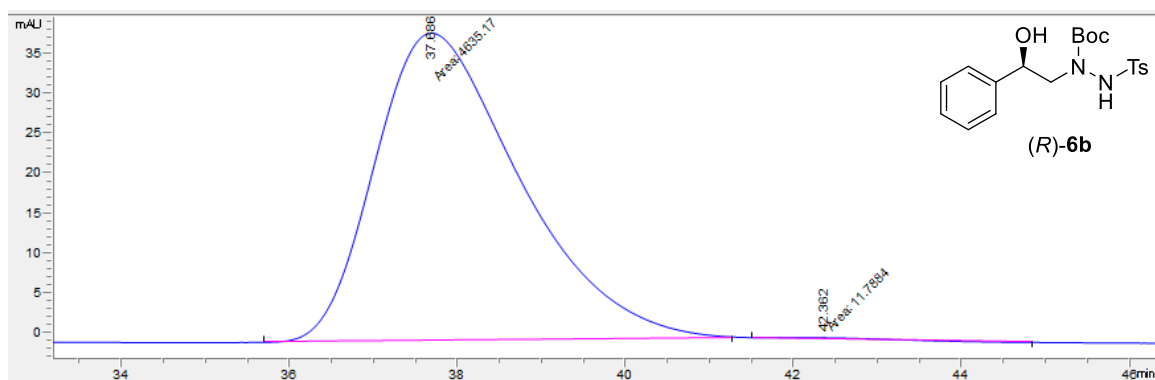

| # | Time   | Area   | Height | Width  | Area%  | Symmetry |
|---|--------|--------|--------|--------|--------|----------|
| 1 | 37.686 | 4635.2 | 38.7   | 1.9974 | 99.746 | 0.632    |
| 2 | 42.362 | 11.8   | 1.5E-1 | 1.3107 | 0.254  | 0.45     |

## HPLC profile of **6c**

Chiralpak IA column (0.46 cm ø x 25 cm) 95:5 hexane:propan-2-ol, T = 25 °C, flow rate 1.0 mL/min.

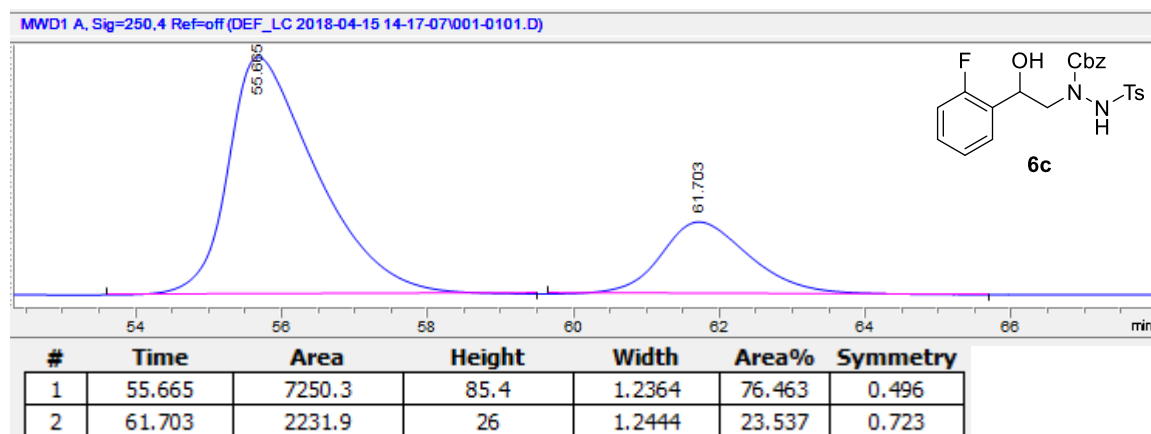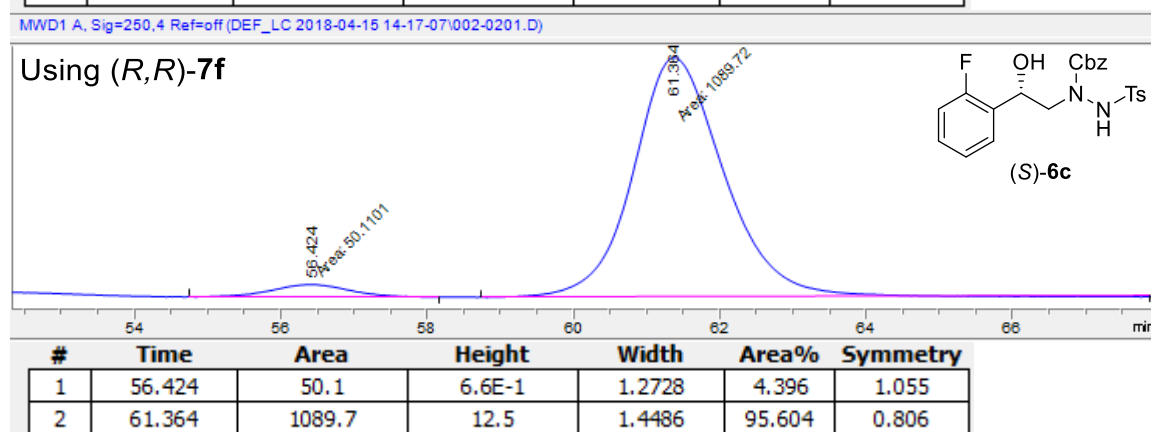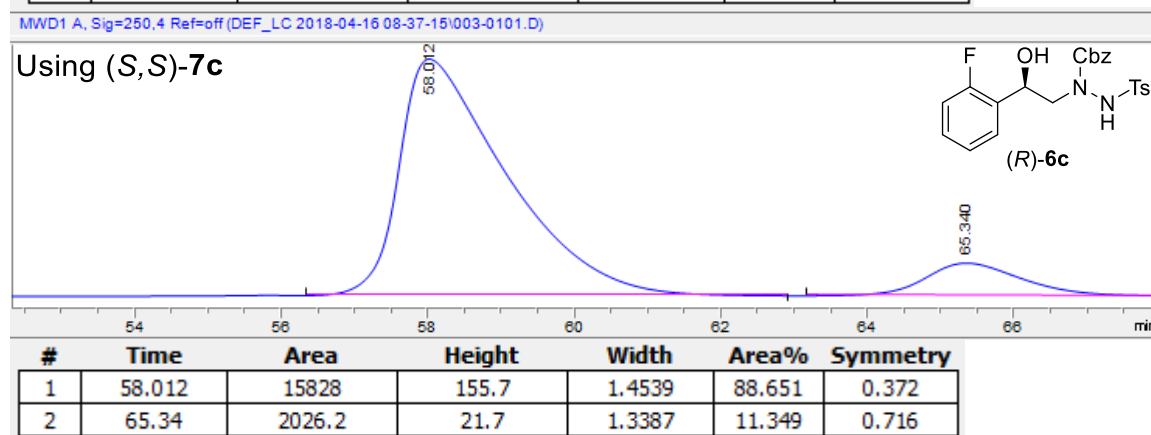

## HPLC profile of **6d**

Chiralpak OD-H column (0.46 cm ø x 25 cm) 92:8 hexane:propan-2-ol, T = 25 °C, flow rate 1.0 mL/min.

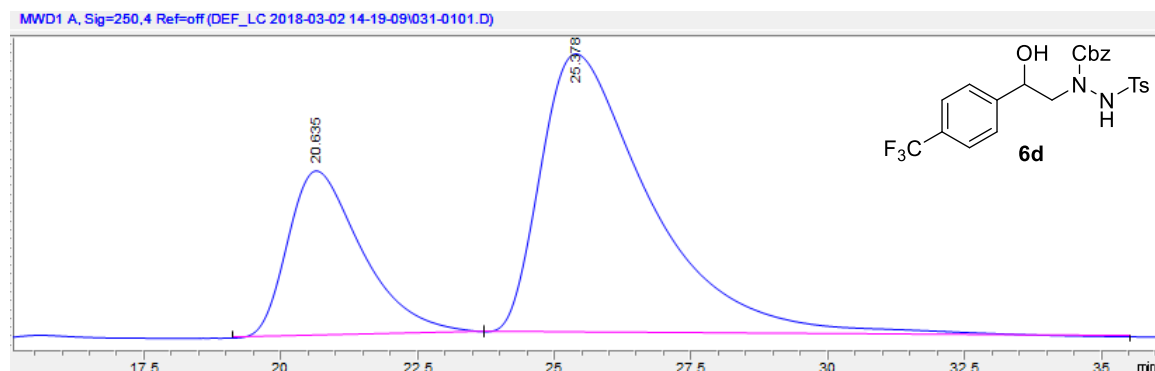

| # | Time   | Area   | Height | Width  | Area%  | Symmetry |
|---|--------|--------|--------|--------|--------|----------|
| 1 | 20.635 | 3538.6 | 37.4   | 1.3676 | 28.519 | 0.594    |
| 2 | 25.378 | 8869.5 | 63.1   | 1.9315 | 71.481 | 0.434    |

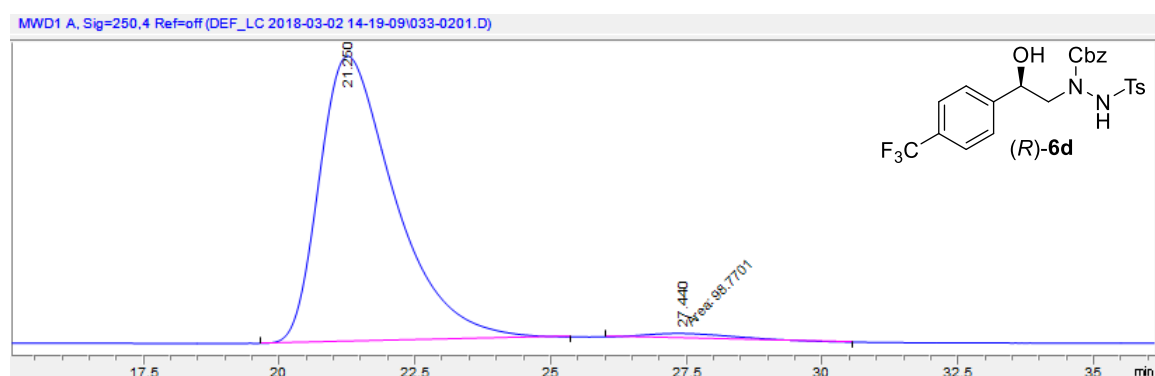

| # | Time  | Area   | Height | Width  | Area%  | Symmetry |
|---|-------|--------|--------|--------|--------|----------|
| 1 | 21.25 | 4579.6 | 47.3   | 1.406  | 97.889 | 0.559    |
| 2 | 27.44 | 98.8   | 8.4E-1 | 1.9503 | 2.111  | 0.592    |



## HPLC profile of **6e**

Chiralpak OD-H column (0.46 cm ø x 25 cm) 91:9 hexane:propan-2-ol, T = 25 °C, flow rate 1.0 mL/min.

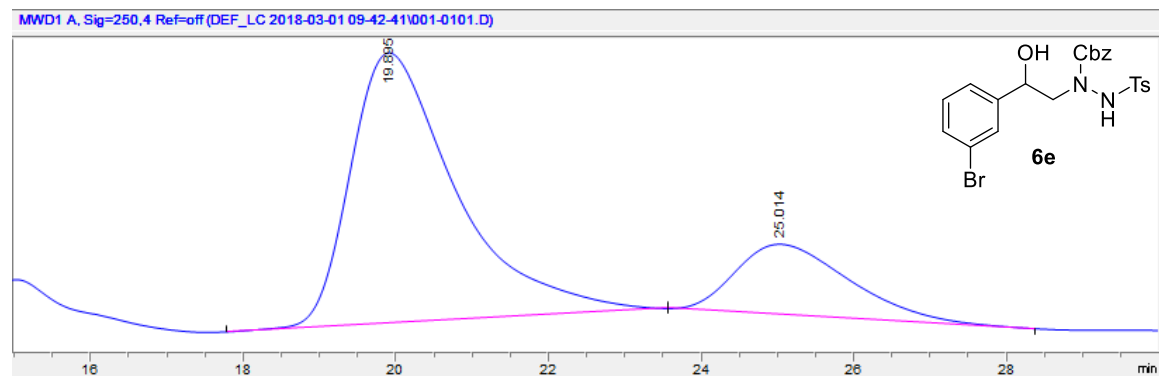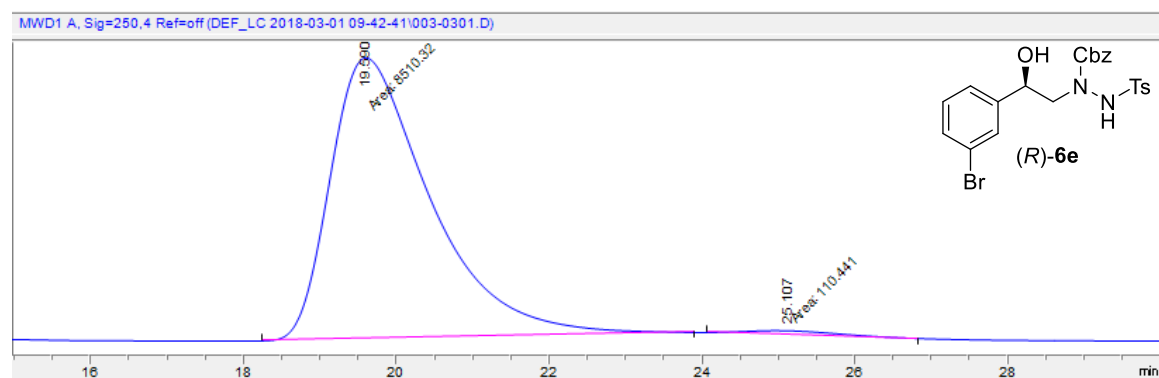

## HPLC profile of **6f**

Chiralpak IA column (0.46 cm ø x 25 cm) 90:10 hexane:propan-2-ol, T = 25 °C, flow rate = 1.0 mL/min.

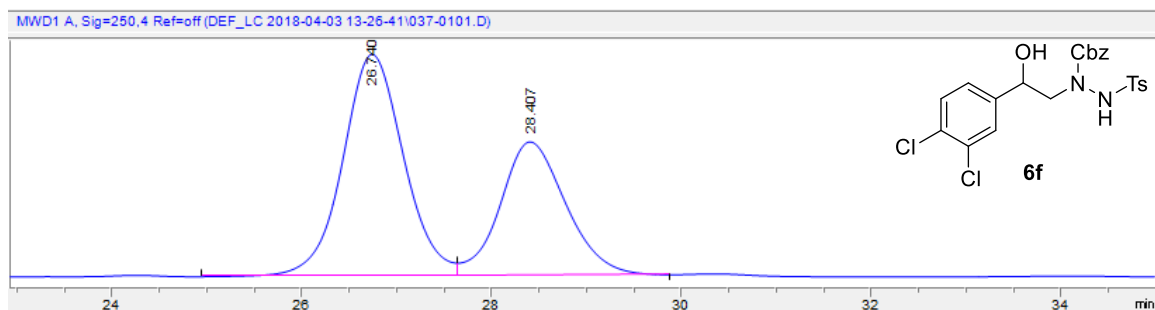

| # | Time   | Area   | Height | Width  | Area%  | Symmetry |
|---|--------|--------|--------|--------|--------|----------|
| 1 | 26.74  | 3715.8 | 83.2   | 0.6833 | 60.641 | 0.92     |
| 2 | 28.407 | 2411.8 | 50.1   | 0.7339 | 39.359 | 0.812    |

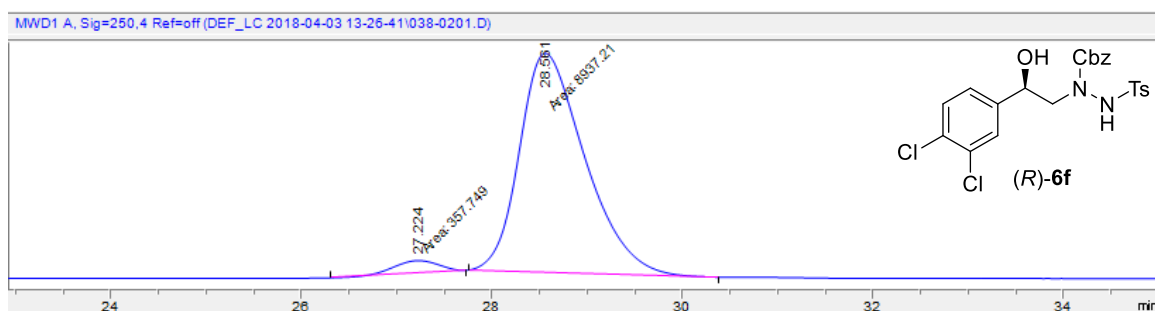

| # | Time   | Area   | Height | Width  | Area%  | Symmetry |
|---|--------|--------|--------|--------|--------|----------|
| 1 | 27.224 | 357.7  | 10.7   | 0.555  | 3.849  | 1.281    |
| 2 | 28.561 | 8937.2 | 186.6  | 0.7984 | 96.151 | 0.636    |

## HPLC profile of **6g**

Chiralpak IA column (0.46 cm ø x 25 cm) 95:5 hexane:propan-2-ol, T = 25 °C, flow rate = 1.0 mL/min.

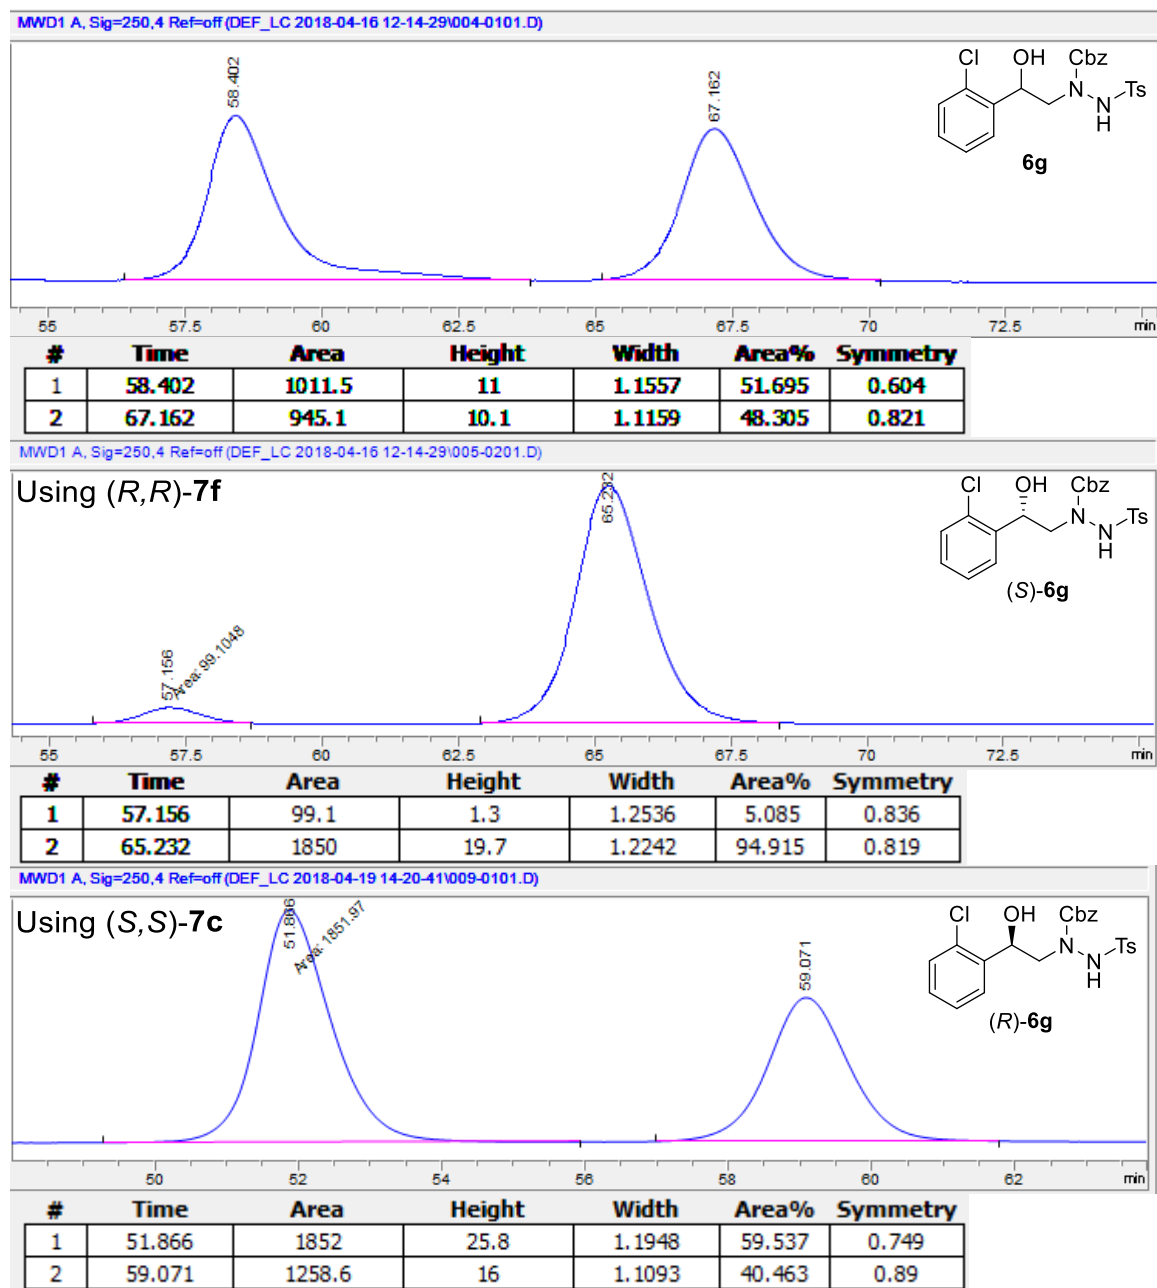

## HPLC profile of **6j**

Chiralpak IA column (0.46 cm ø x 25 cm), 85:15 hexane:propan-2-ol, T = 25°C, flow rate = 1.0 mL/min.

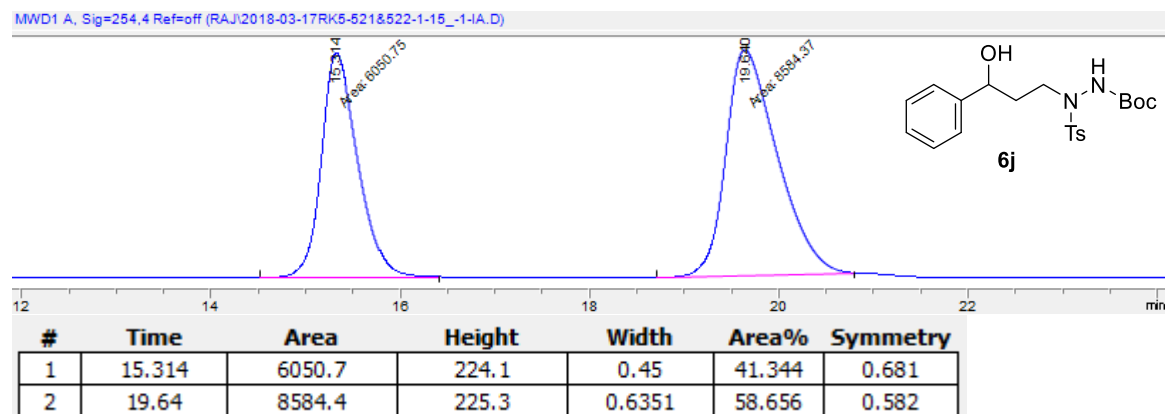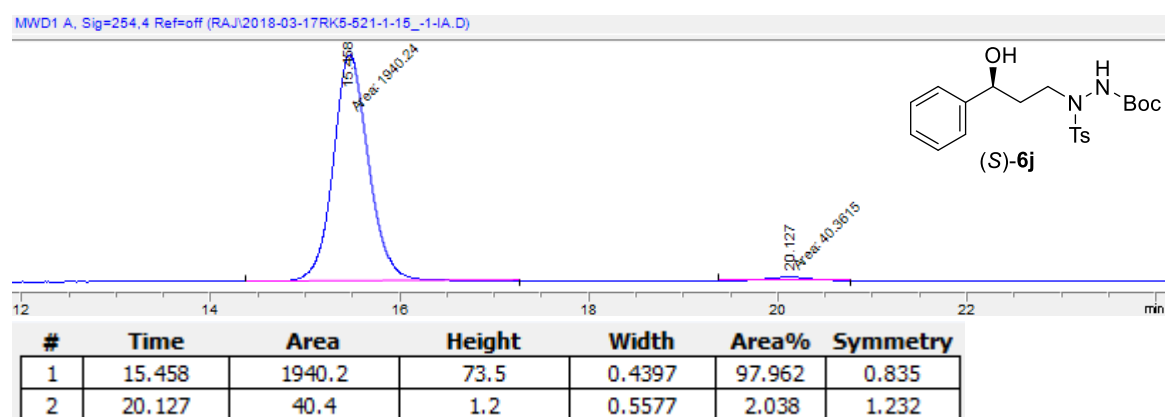

## HPLC profile of **6I**

Chiralpak OD-H column (0.46 cm ø x 25 cm) 90:10 hexane:propan-2-ol, T = 25 °C, flow rate = 1.0 mL/min.

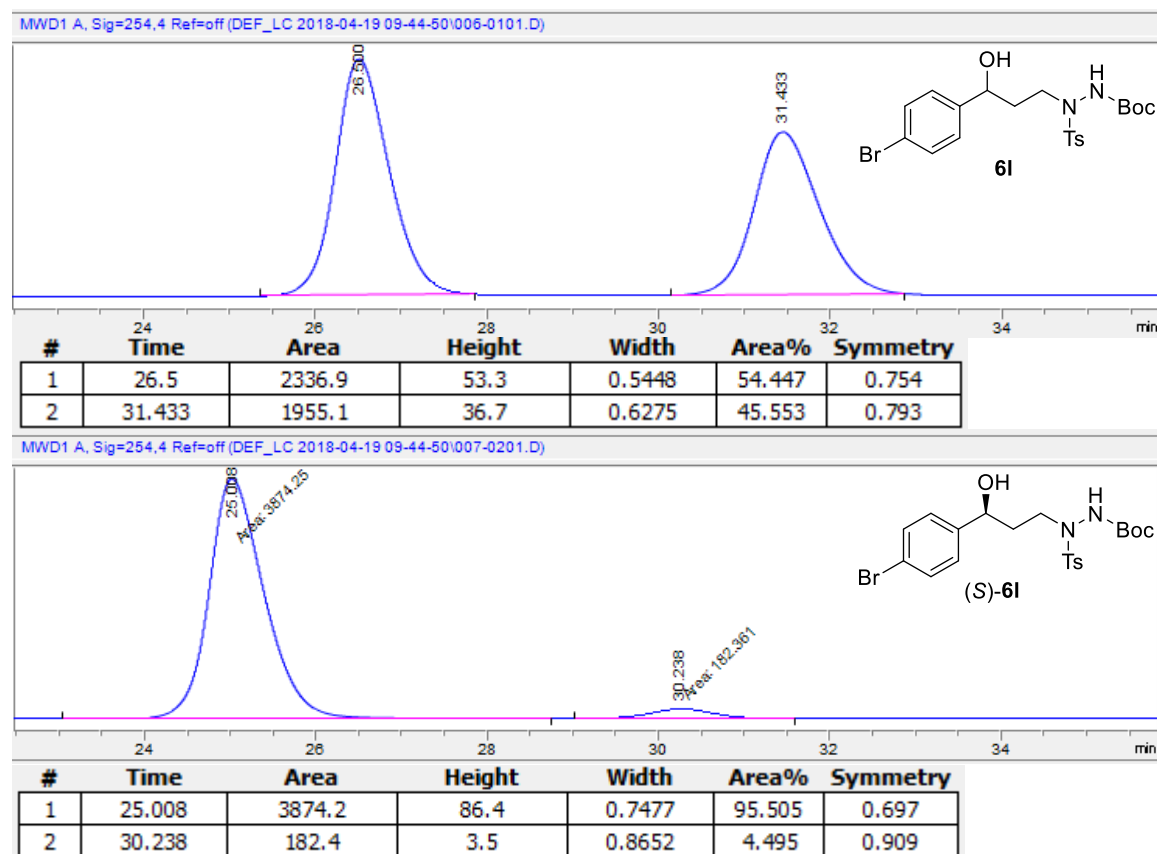

## HPLC profile of **6m**

Chiralpak IA column (0.46 cm ø x 25 cm) 95:5 hexane:propan-2-ol, T = 25 °C, flow rate = 1.0 mL/min.

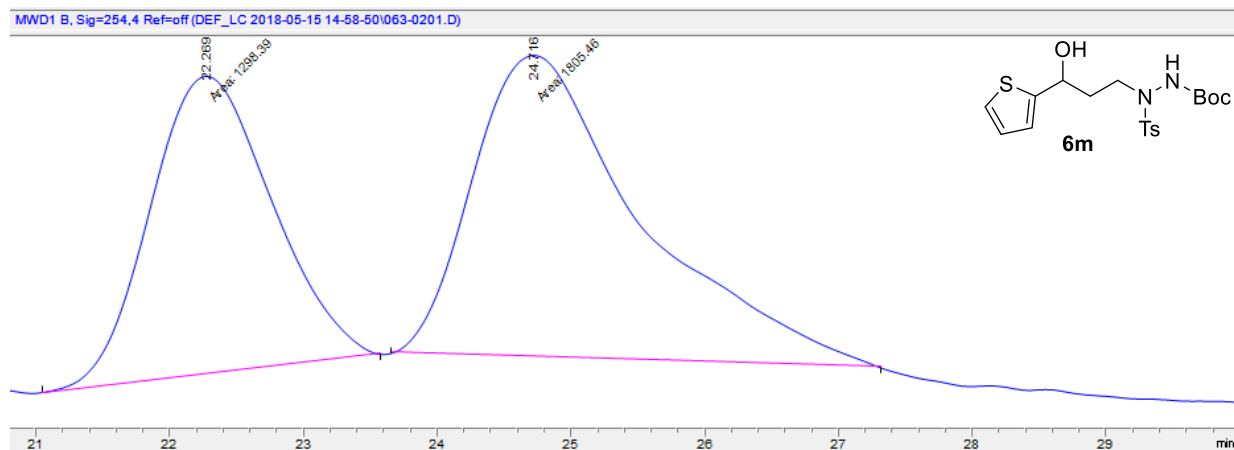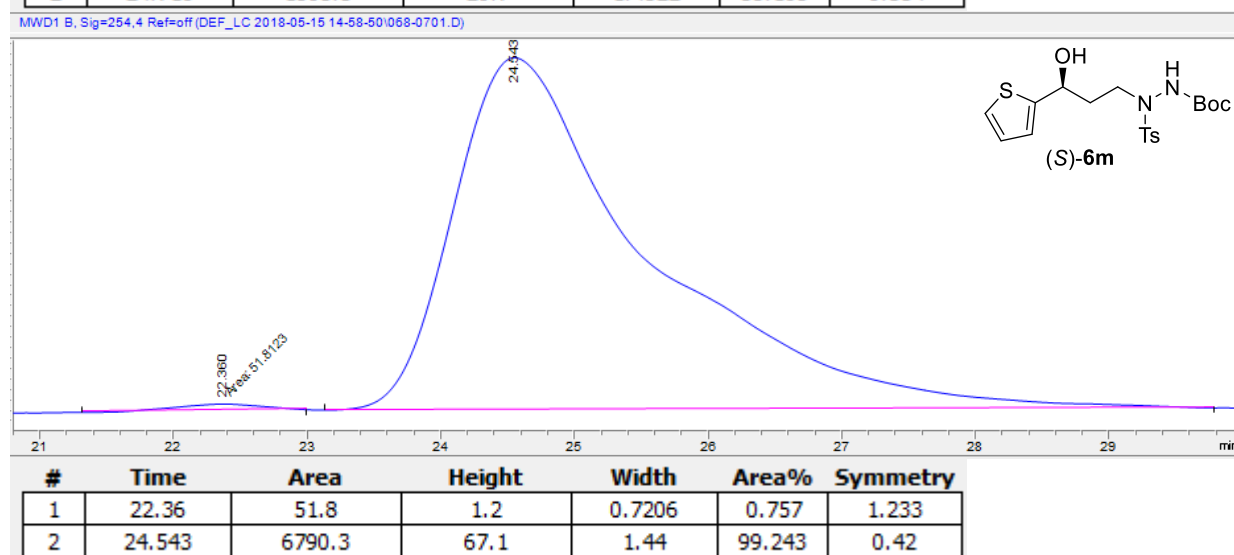

## HPLC profile of **6n**

Chiralpak IA column (0.46 cm ø x 25 cm), 90:10 hexane:propan-2-ol, T = 25°C, flow rate = 1.0 mL/min.

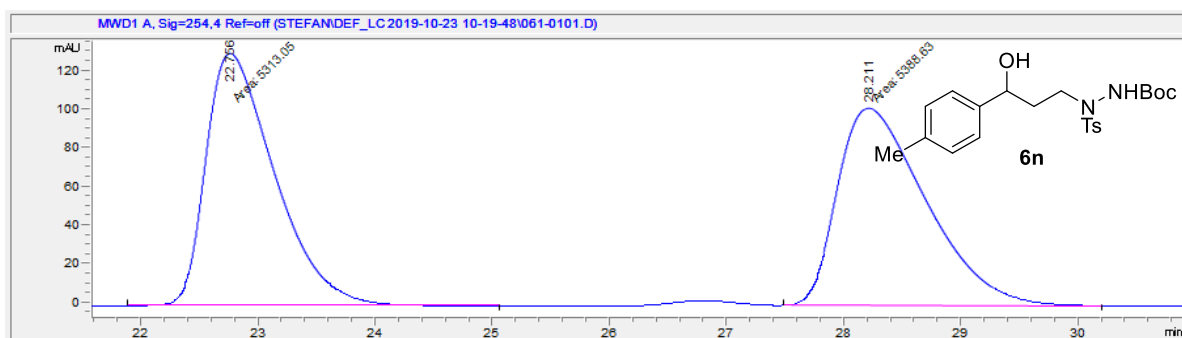

| # | Time   | Area   | Height | Width  | Area%  | Symmetry |
|---|--------|--------|--------|--------|--------|----------|
| 1 | 22.756 | 5313.1 | 130.3  | 0.6794 | 49.647 | 0.526    |
| 2 | 28.211 | 5388.6 | 102.1  | 0.8795 | 50.353 | 0.523    |

## Using (S,S)-**7c**

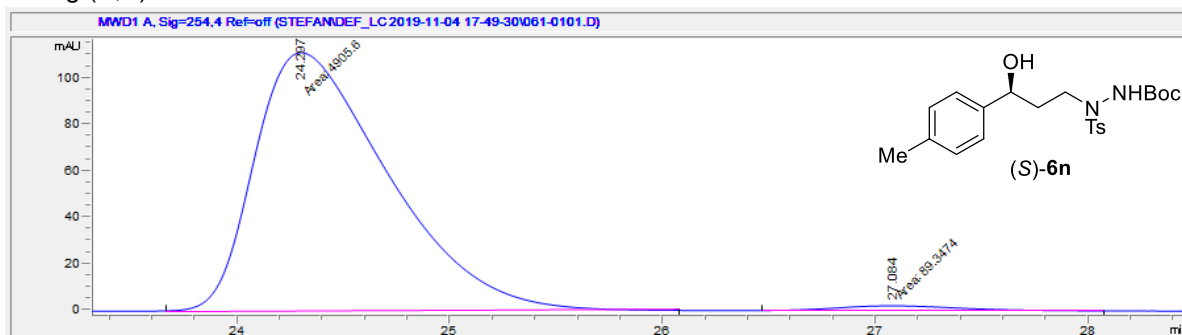

| # | Time   | Area   | Height | Width  | Area%  | Symmetry |
|---|--------|--------|--------|--------|--------|----------|
| 1 | 24.297 | 4905.6 | 111.9  | 0.7307 | 98.211 | 0.524    |
| 2 | 27.084 | 89.3   | 2.1    | 0.6949 | 1.789  | 0.76     |

## Using (R,R)-**7c**

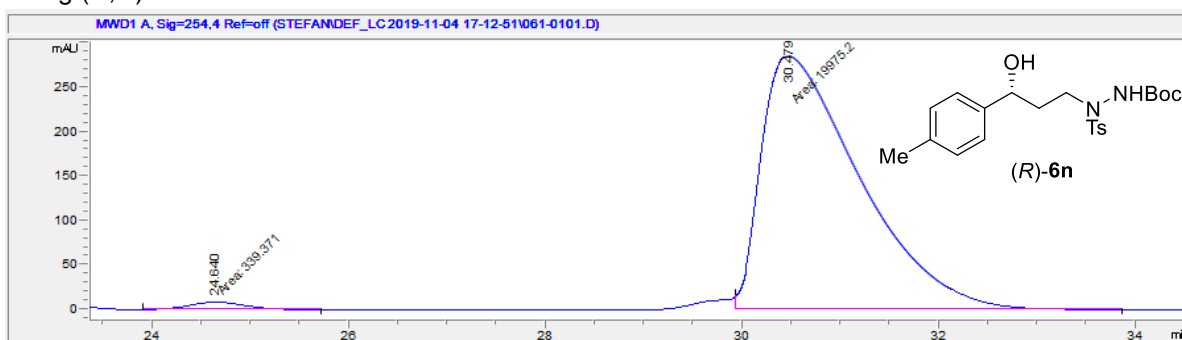

| # | Time   | Area    | Height | Width  | Area%  | Symmetry |
|---|--------|---------|--------|--------|--------|----------|
| 1 | 24.64  | 339.4   | 8.4    | 0.6716 | 1.671  | 0.843    |
| 2 | 30.479 | 19975.2 | 287.2  | 1.159  | 98.329 | 0.377    |

## HPLC profile of **6o**

Chiralpak IA column (0.46 cm ø x 25 cm), 90:10 hexane:propan-2-ol, T = 25°C, flow rate = 1.0 mL/min.

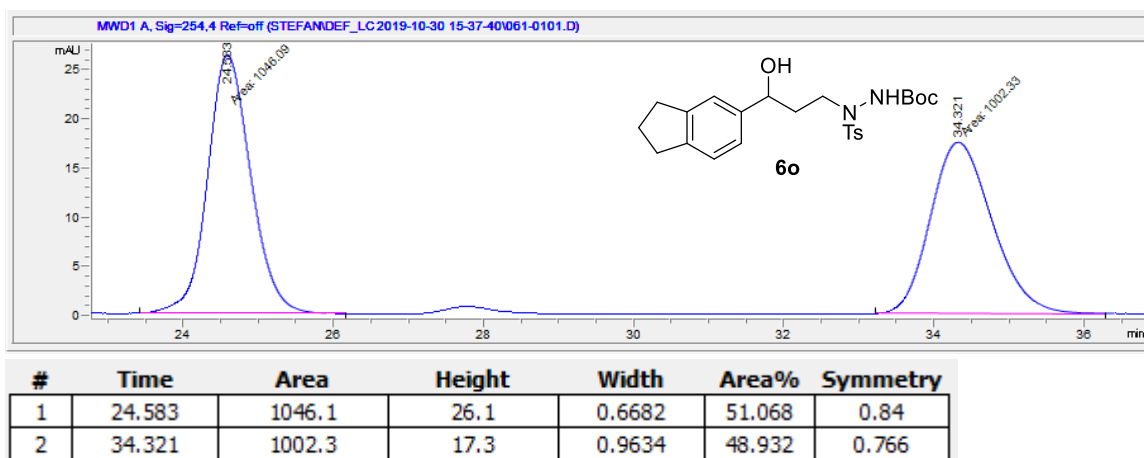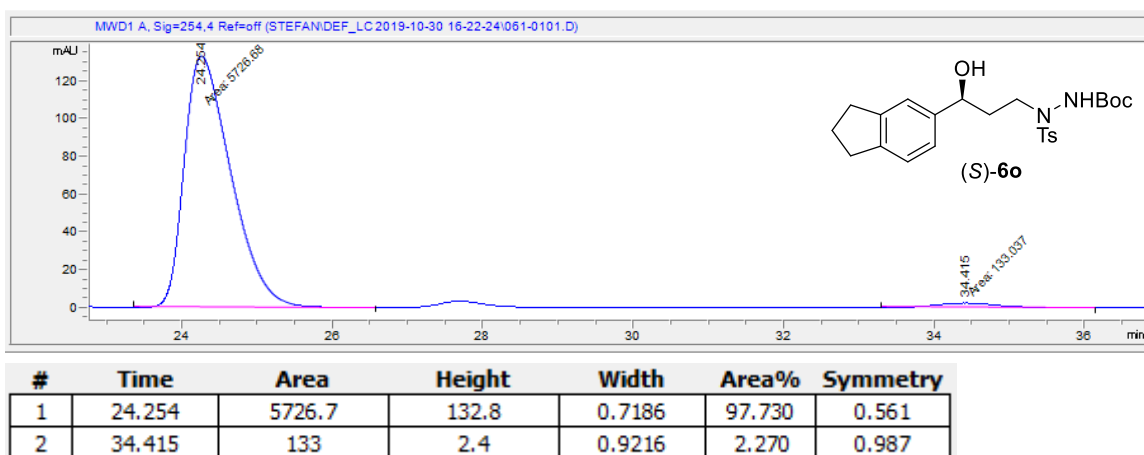



## HPLC Trace of **6p**

Chiralpak IA column (0.46 cm ø x 25 cm) 90:10 hexane:propan-2-ol, T = 25 °C, flow rate = 1.0 mL/min.

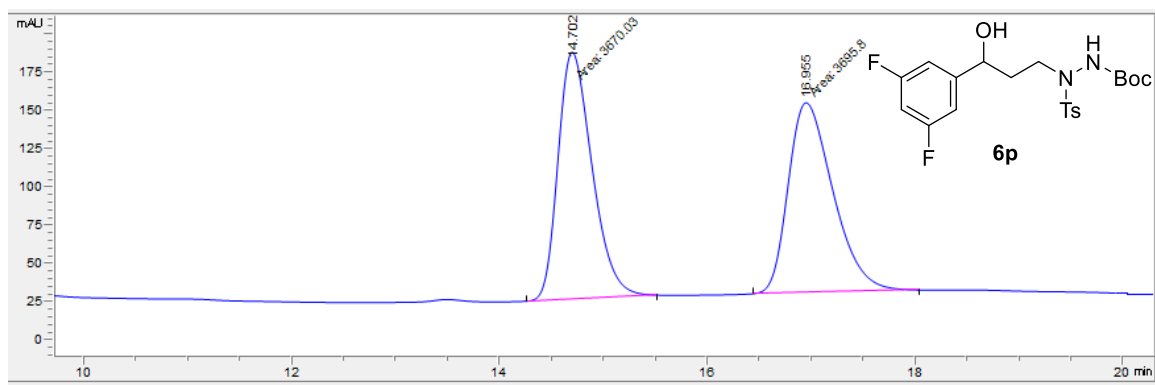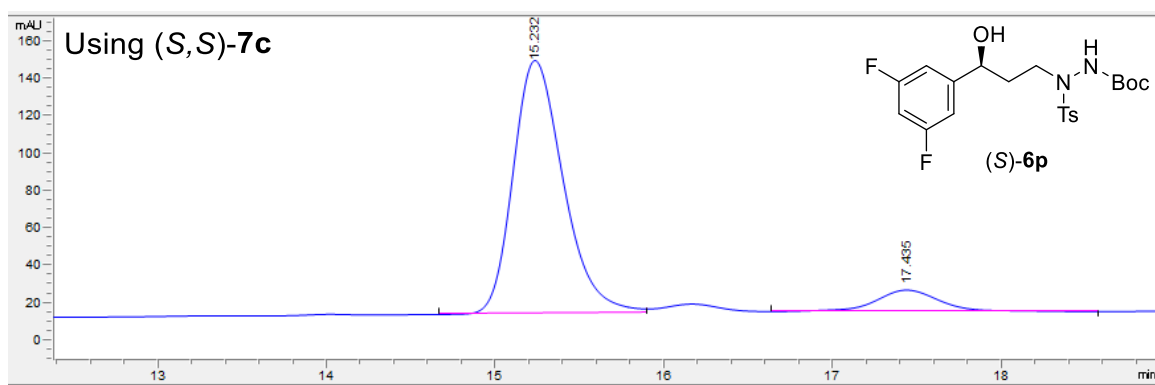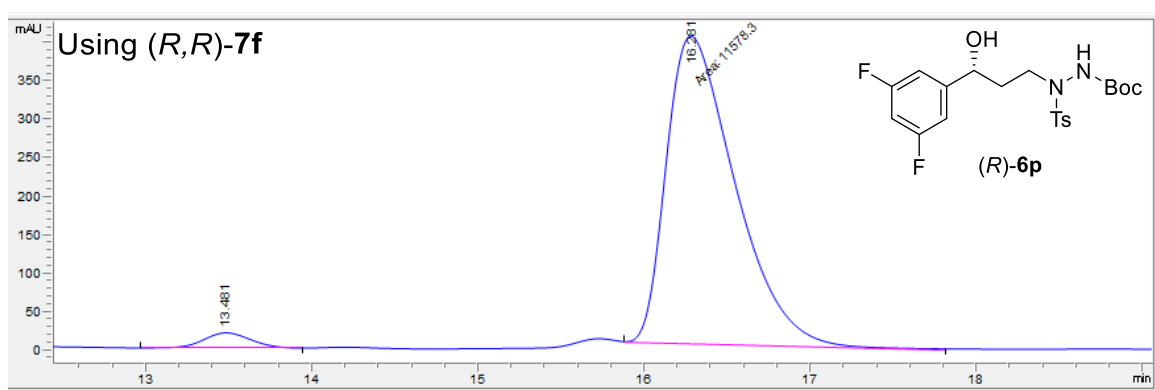

## HPLC profile of **6q**

Chiralpak IA column (0.46 cm ø x 25 cm), 80:20 hexane:propan-2-ol, T = 25°C, flow rate = 1.0 mL/min.

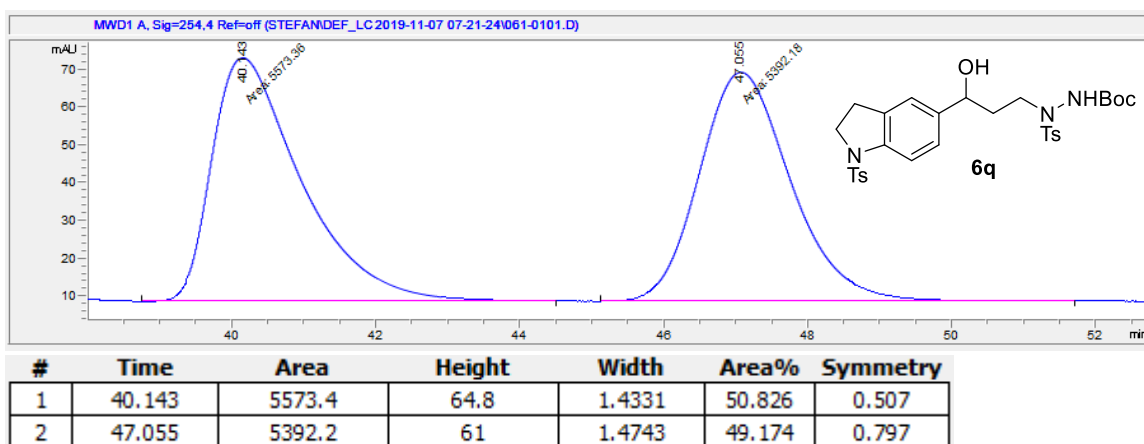

## Using (S,S)-**7c**

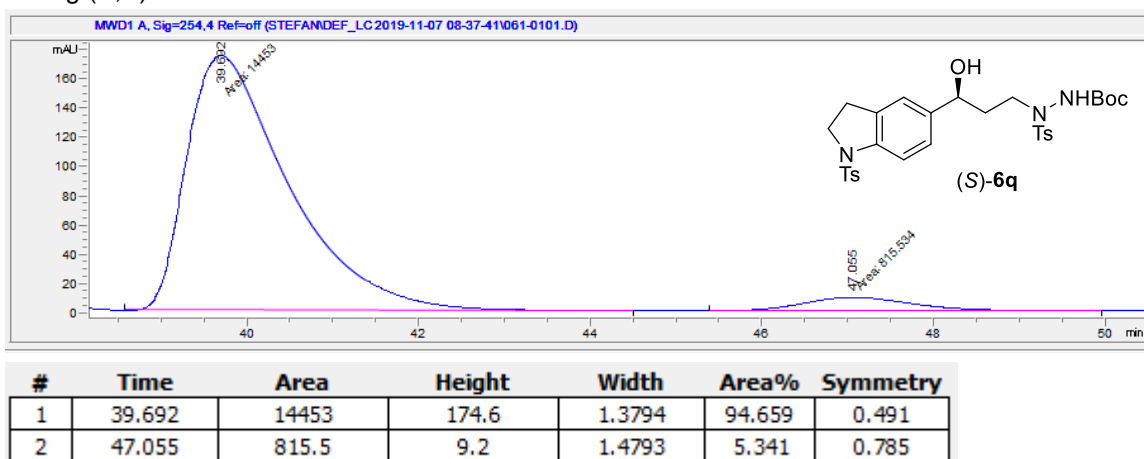

## Using (R,R)-**7c**

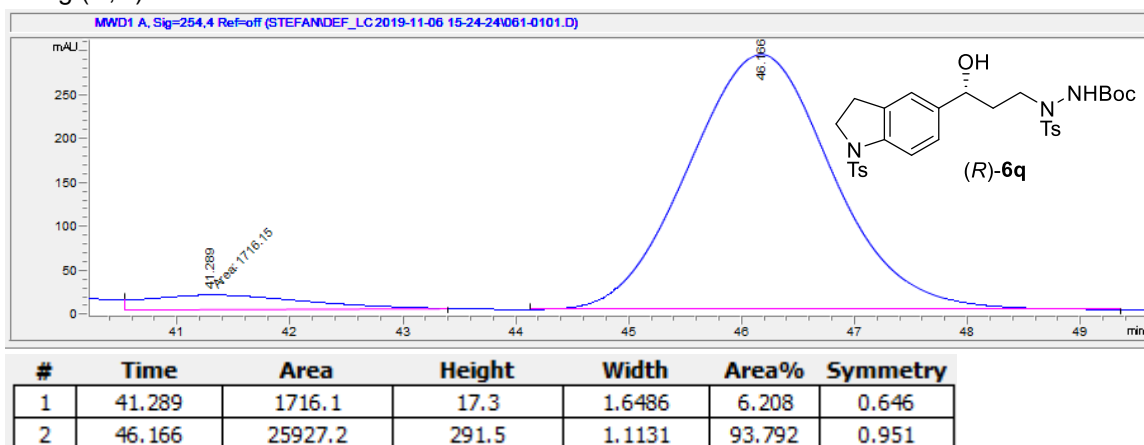

## HPLC profile of **6t**

Chiralpak OD-H column (0.46 cm ø x 25 cm), 97.5:2.5 hexane:propan-2-ol, T = 25 °C, flow rate = 1.0 mL/min.

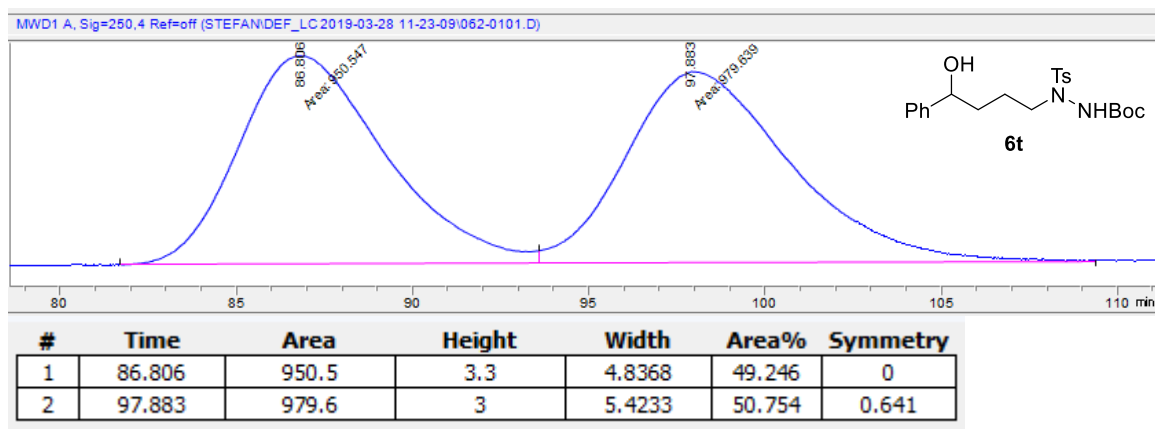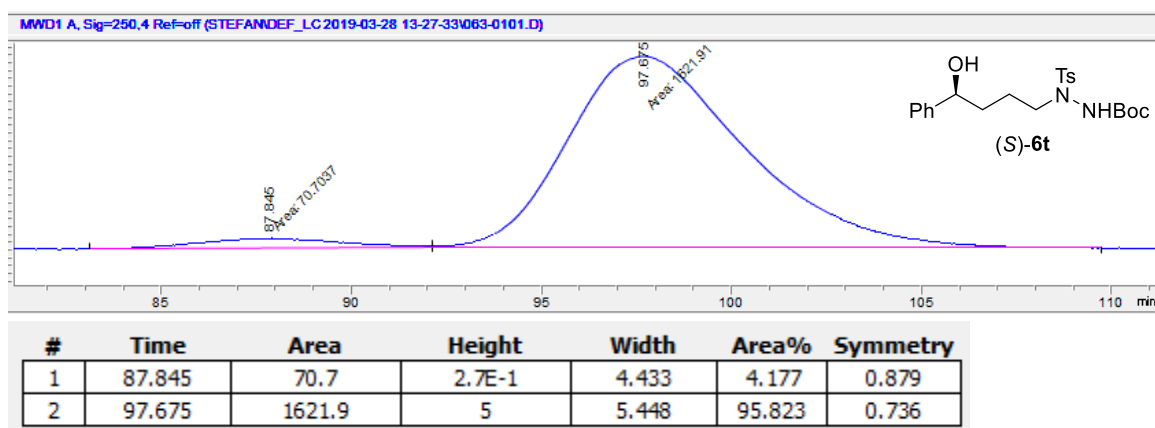

## HPLC profile of **6u**

Chiralpak OD-H column (0.46 cm ø x 25 cm), 96:4 hexane:propan-2-ol, T = 25 °C, flow rate = 1.0 mL/min.

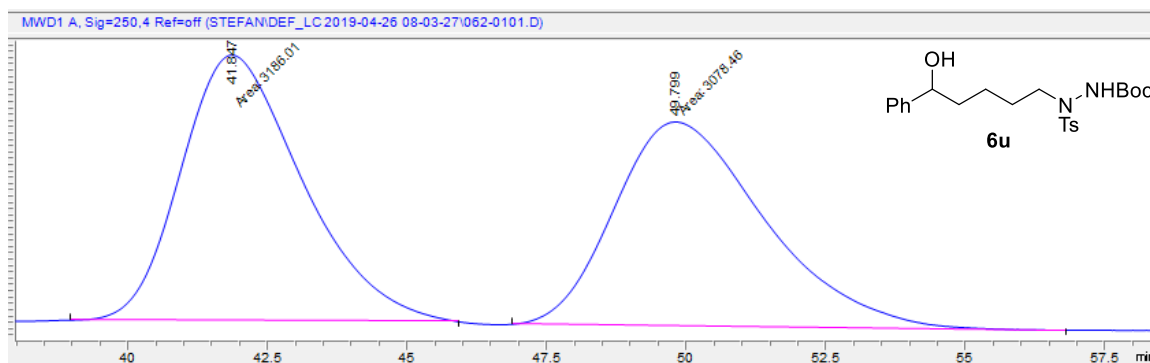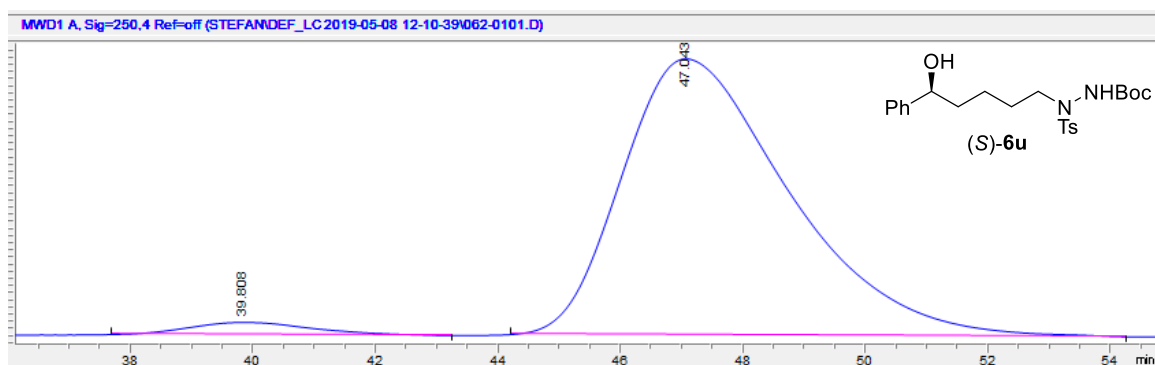

## HPLC profile of **6v**

Chiralpak OD-H column (0.46 cm ø x 25 cm), 96:4 hexane:propan-2-ol, T = 25 °C, flow rate = 1.0 mL/min.

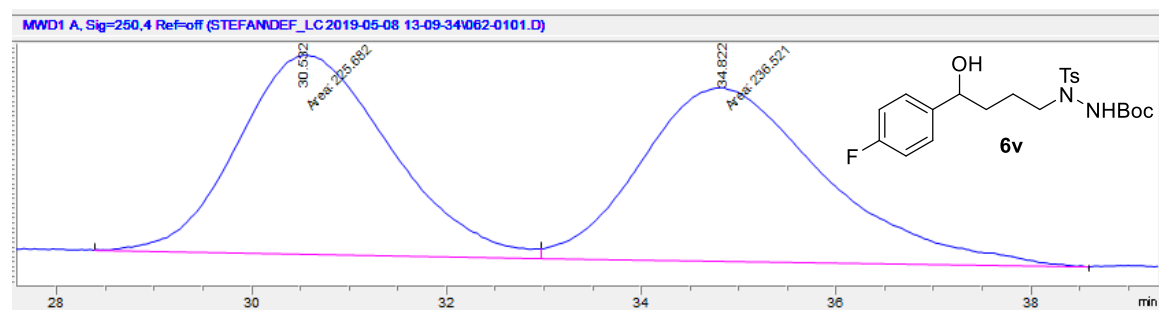

| # | Time   | Area  | Height | Width  | Area%  | Symmetry |
|---|--------|-------|--------|--------|--------|----------|
| 1 | 30.532 | 225.7 | 2.1    | 1.8276 | 48.827 | 0        |
| 2 | 34.822 | 236.5 | 1.8    | 2.1969 | 51.173 | 0.771    |

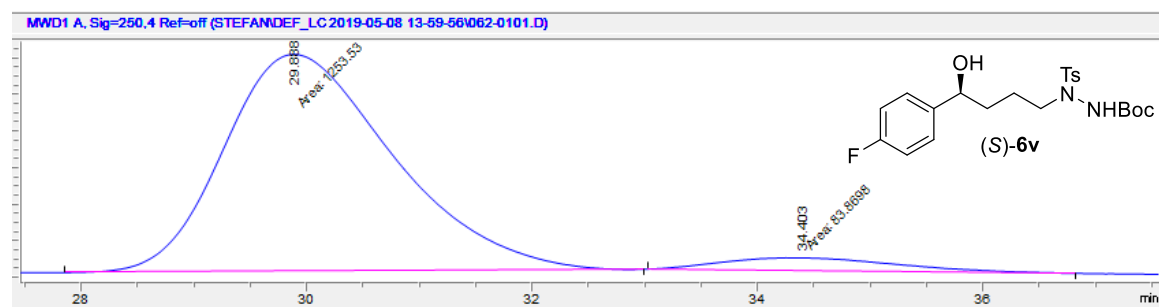

| # | Time   | Area   | Height | Width  | Area%  | Symmetry |
|---|--------|--------|--------|--------|--------|----------|
| 1 | 29.888 | 1253.5 | 11.9   | 1.7504 | 93.729 | 0.699    |
| 2 | 34.403 | 83.9   | 7.4E-1 | 1.8905 | 6.271  | 0.73     |

## HPLC profile of **8a**

Chiralcel OD-H column (0.46 cm ø x 25 cm), 90:10 hexane:propan-2-ol, T = 25°C,  
flow rate = 1.0 mL/min.

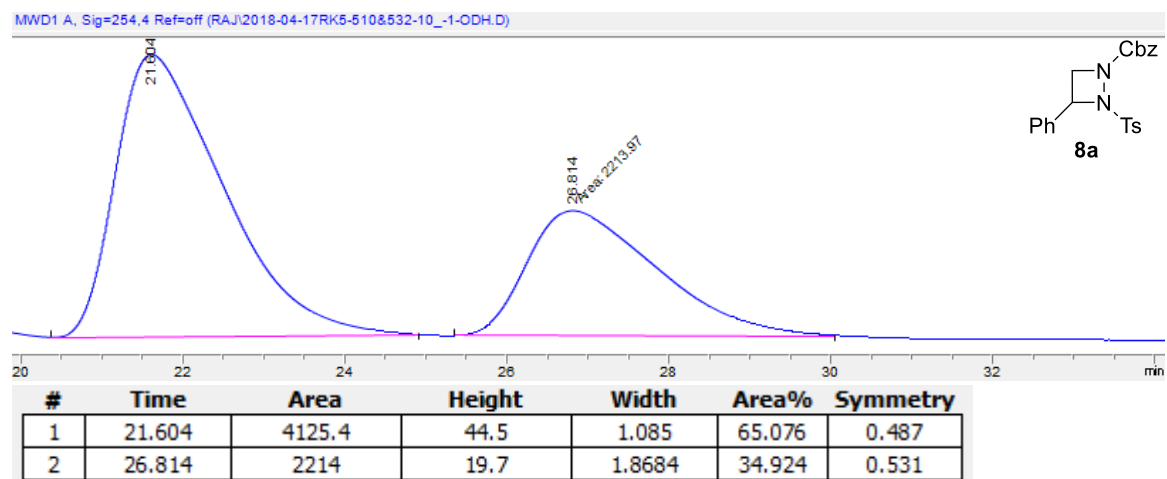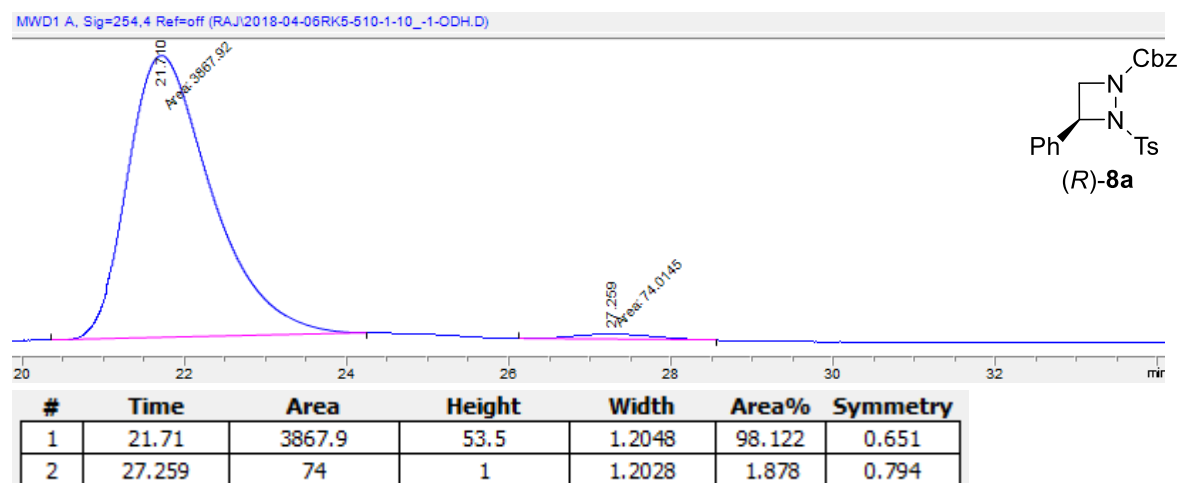

## HPLC Trace of **8b**

Chiralpak IA column (0.46 cm ø x 25 cm) 99.4:0.6 hexane:propan-2-ol, T = 25 °C, flow rate = 1.0 mL/min.

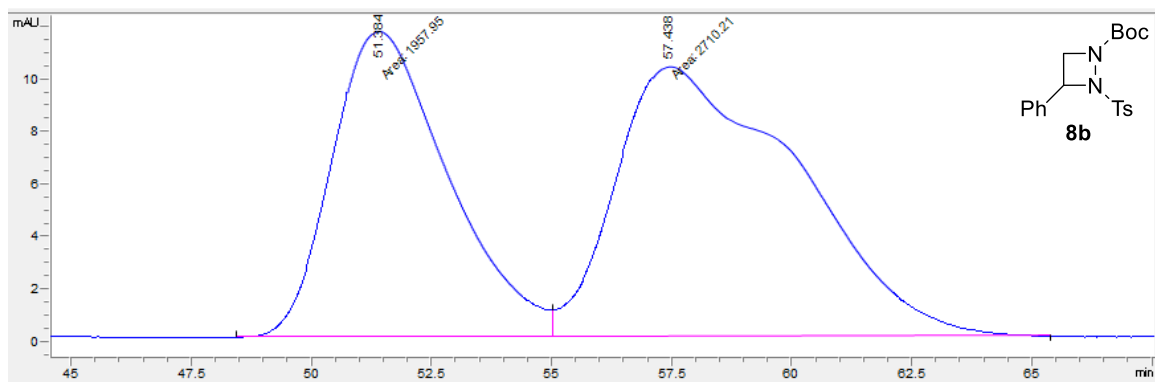

| # | Time   | Area   | Height | Width  | Area%  | Symmetry |
|---|--------|--------|--------|--------|--------|----------|
| 1 | 51.384 | 1958   | 11.7   | 2.7922 | 41.943 | 0        |
| 2 | 57.438 | 2710.2 | 10.3   | 4.3787 | 58.057 | 0.419    |

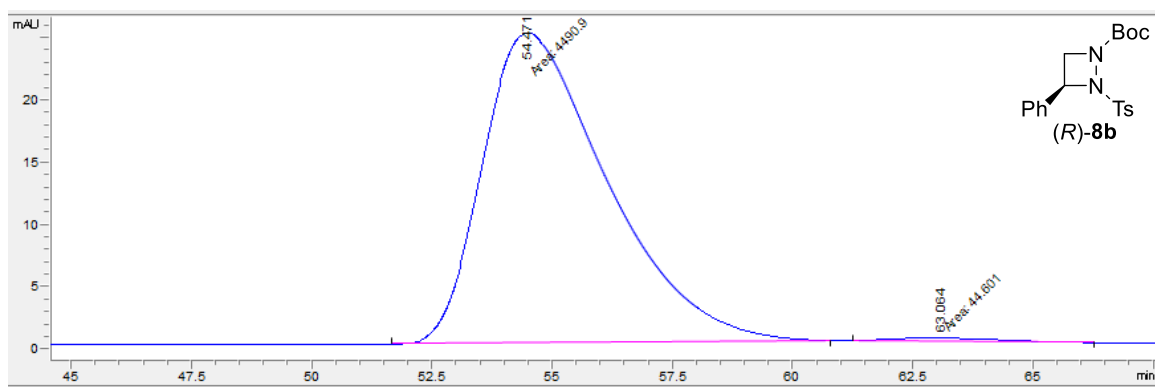

| # | Time   | Area   | Height | Width  | Area%  | Symmetry |
|---|--------|--------|--------|--------|--------|----------|
| 1 | 54.471 | 4490.9 | 24.9   | 3.0044 | 99.017 | 0.552    |
| 2 | 63.064 | 44.6   | 2.9E-1 | 2.5884 | 0.983  | 0.728    |

## HPLC profile of **8c**

Chiralpak OD-H column (0.46 cm ø x 25 cm) 90:10 hexane:propan-2-ol, T = 25 °C, flow rate 1.0 mL/min.

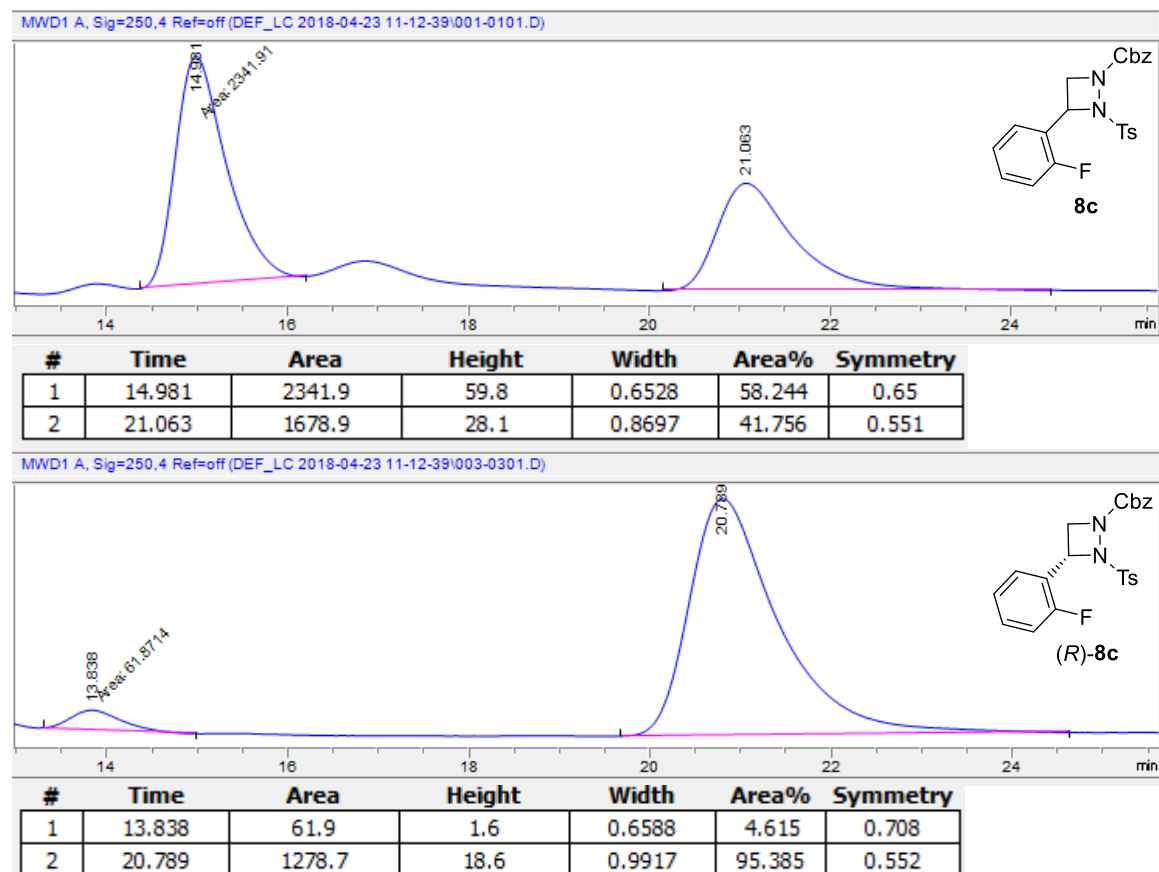



## HPLC profile of **8d**

Chiralpak OD-H column (0.46 cm ø x 25 cm) 90:10 hexane:propan-2-ol, T = 25 °C, flow rate 1.0 mL/min.

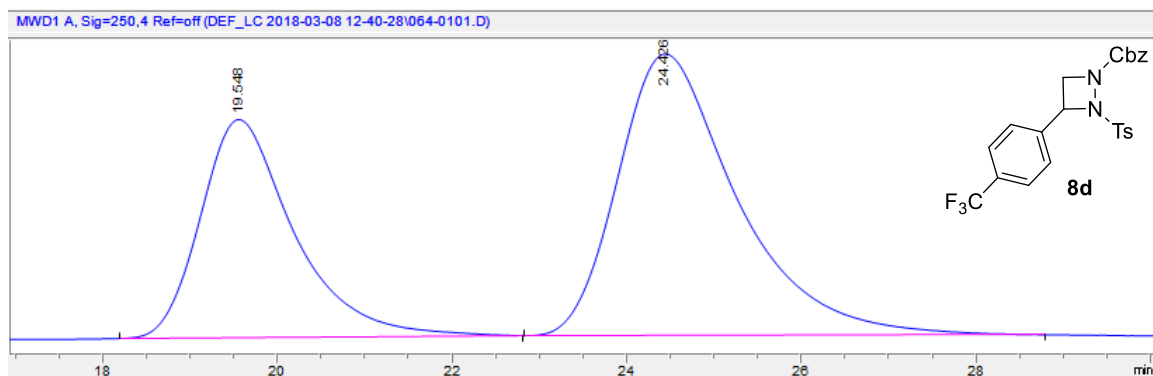

| # | Time   | Area   | Height | Width  | Area%  | Symmetry |
|---|--------|--------|--------|--------|--------|----------|
| 1 | 19.548 | 1473.7 | 19.8   | 1.0899 | 37.836 | 0.648    |
| 2 | 24.426 | 2421.3 | 25.6   | 1.3272 | 62.164 | 0.618    |

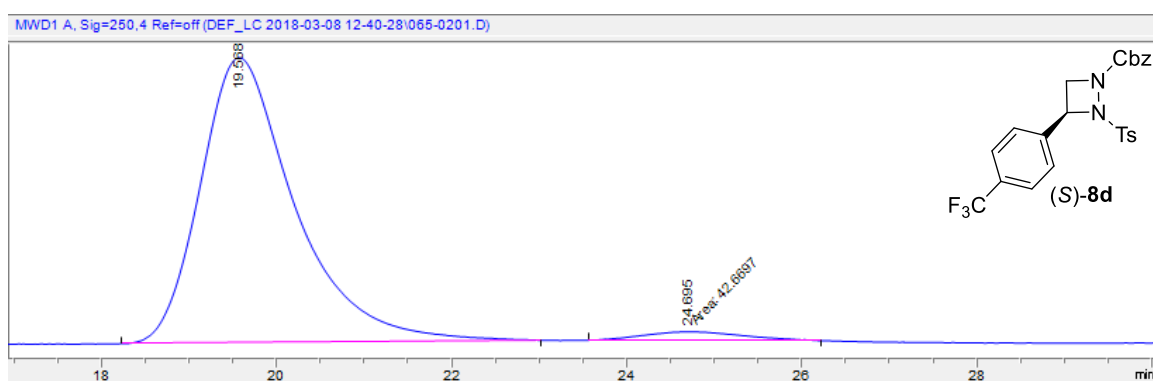

| # | Time   | Area   | Height | Width  | Area%  | Symmetry |
|---|--------|--------|--------|--------|--------|----------|
| 1 | 19.568 | 1326.5 | 17.7   | 1.0588 | 96.884 | 0.658    |
| 2 | 24.695 | 42.7   | 5.3E-1 | 1.3305 | 3.116  | 0.78     |

## HPLC profile of **8e**

Chiralpak OD-H column (0.46 cm ø x 25 cm) 90:10 hexane:propan-2-ol, T = 25 °C, flow rate 1.0 mL/min.

N.B. The racemic HPLC trace was generated by mixing the (*R*) and (*S*) enantiomers.

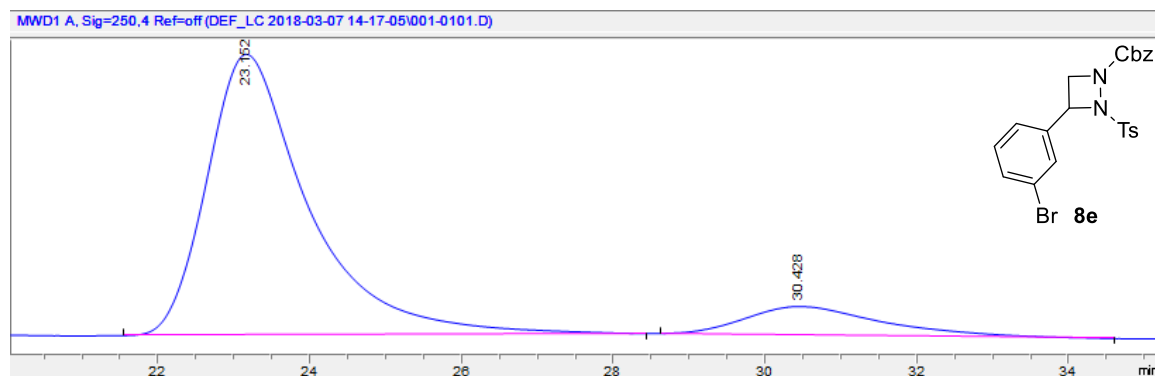

| # | Time   | Area   | Height | Width  | Area%  | Symmetry |
|---|--------|--------|--------|--------|--------|----------|
| 1 | 23.152 | 2653.5 | 28.5   | 1.2975 | 87.914 | 0.589    |
| 2 | 30.428 | 364.8  | 2.9    | 1.4815 | 12.086 | 0.619    |

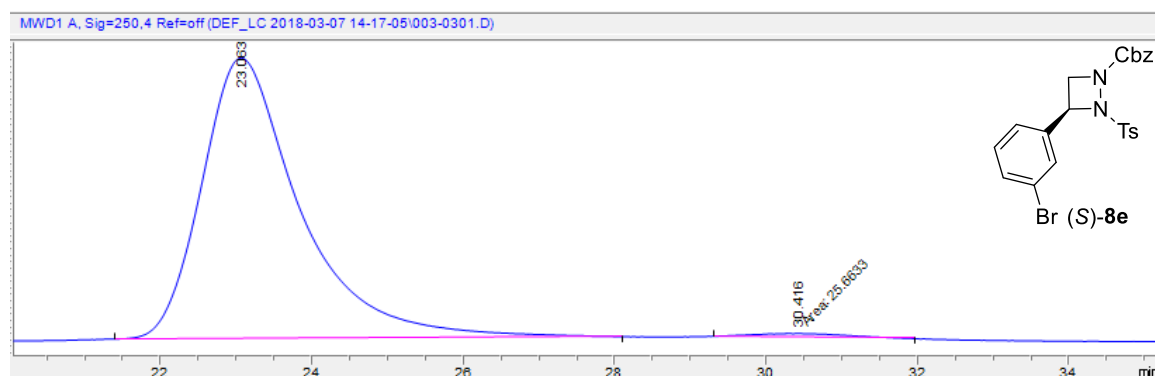

| # | Time   | Area   | Height | Width  | Area%  | Symmetry |
|---|--------|--------|--------|--------|--------|----------|
| 1 | 23.063 | 1953.3 | 21.6   | 1.2654 | 98.703 | 0.626    |
| 2 | 30.416 | 25.7   | 2.9E-1 | 1.4739 | 1.297  | 0.716    |

## HPLC profile of **8f**

Chiralpak OD-H column (0.46 cm ø x 25 cm) 90:10 hexane:propan-2-ol, T = 25 °C, flow rate = 1.0 mL/min.

N.B. The racemic HPLC trace was generated by mixing the (*R*) and (*S*) enantiomers.

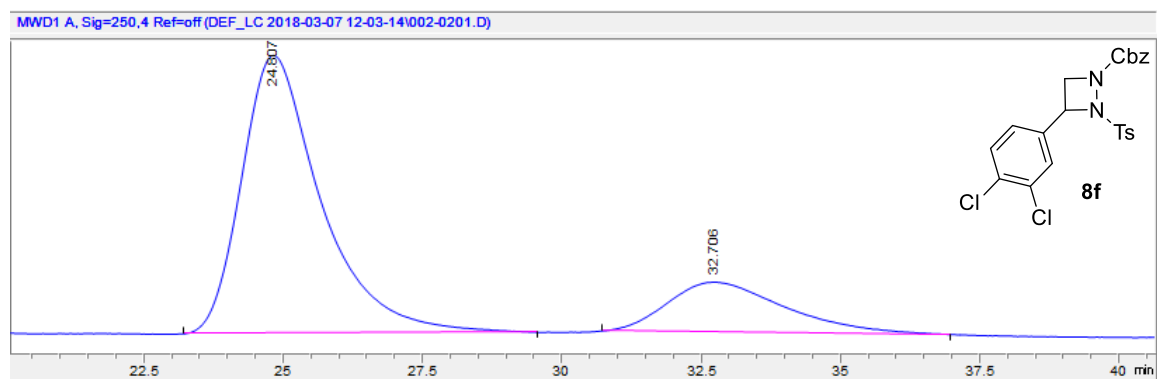

| # | Time   | Area   | Height | Width  | Area%  | Symmetry |
|---|--------|--------|--------|--------|--------|----------|
| 1 | 24.807 | 1368.7 | 13.8   | 1.25   | 79.041 | 0.628    |
| 2 | 32.706 | 362.9  | 2.5    | 1.7194 | 20.959 | 0.627    |

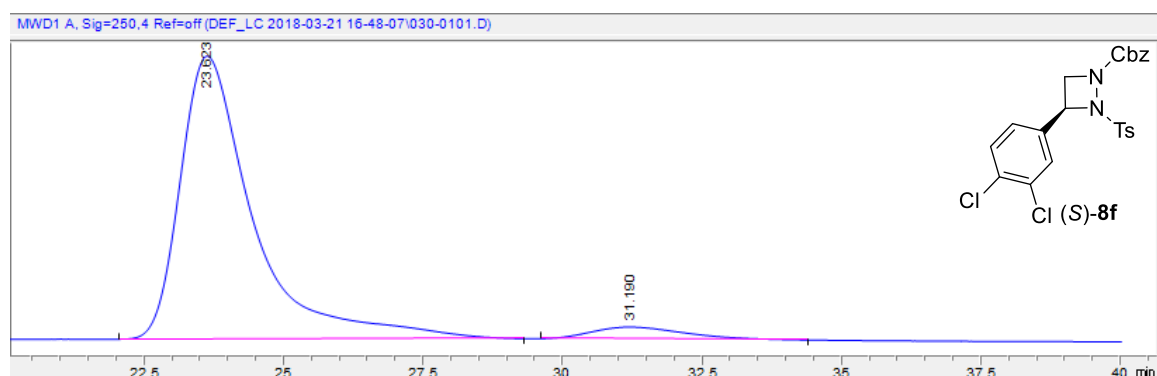

| # | Time   | Area   | Height | Width  | Area%  | Symmetry |
|---|--------|--------|--------|--------|--------|----------|
| 1 | 23.623 | 4613.9 | 50.6   | 1.3233 | 94.807 | 0.532    |
| 2 | 31.19  | 252.7  | 2.2    | 1.3716 | 5.193  | 0.657    |

## HPLC profile of **8g**

Chiralpak IA column (0.46 cm ø x 25 cm) 90:10 hexane:propan-2-ol, T = 25 °C, flow rate = 1.0 mL/min.

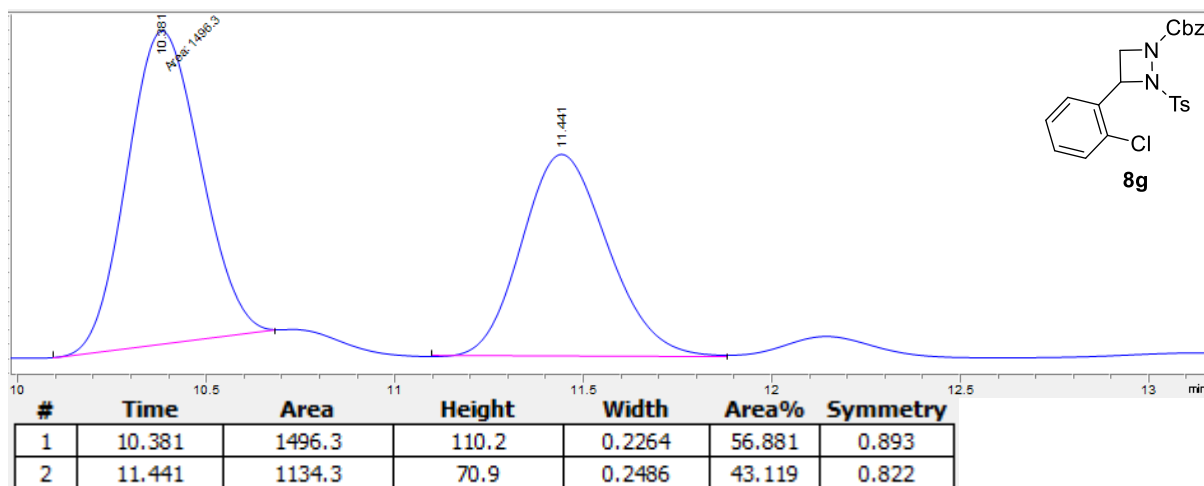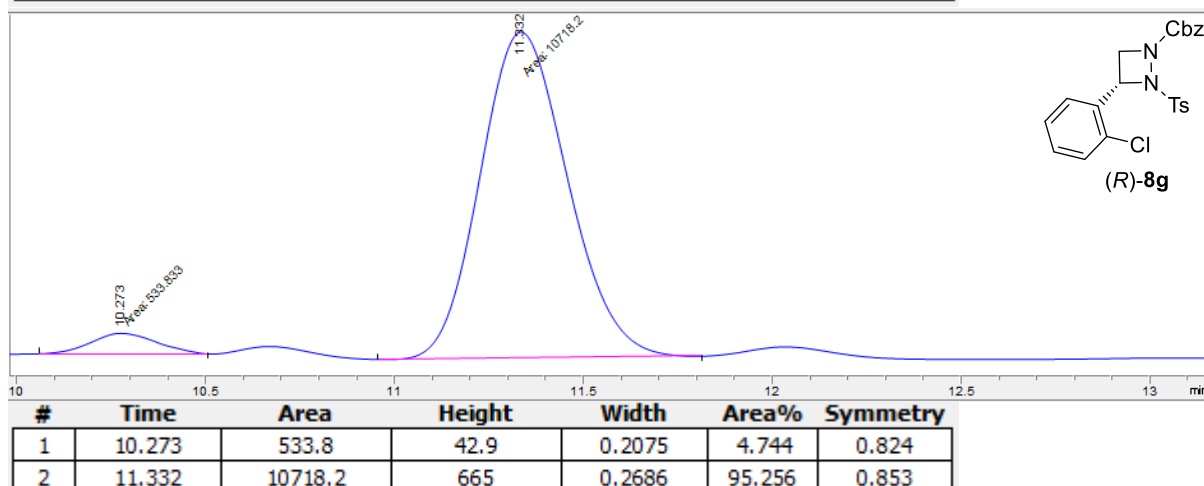

## HPLC profile of **8h**

Chiralpak IA column (0.46 cm ø x 25 cm) 90:10 hexane:propan-2-ol, T = 25 °C, flow rate = 1.0 mL/min.

N.B. The racemic HPLC trace was generated by mixing the (*R*) and (*S*) enantiomers.

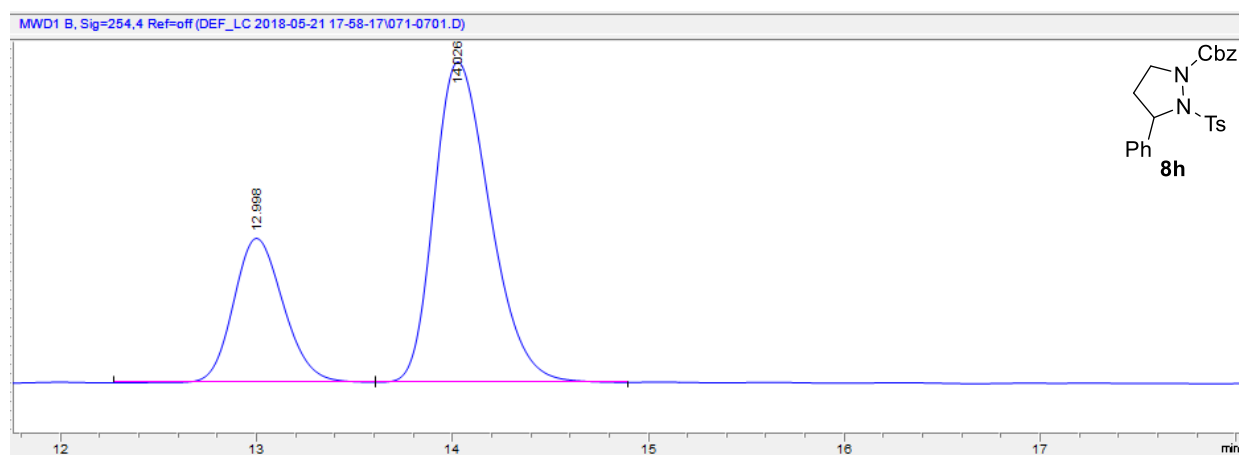

| # | Time   | Area   | Height | Width  | Area%  | Symmetry |
|---|--------|--------|--------|--------|--------|----------|
| 1 | 12.998 | 1395   | 78.3   | 0.2758 | 28.780 | 0.819    |
| 2 | 14.026 | 3452.2 | 173.9  | 0.3096 | 71.220 | 0.699    |

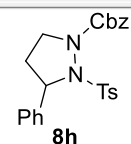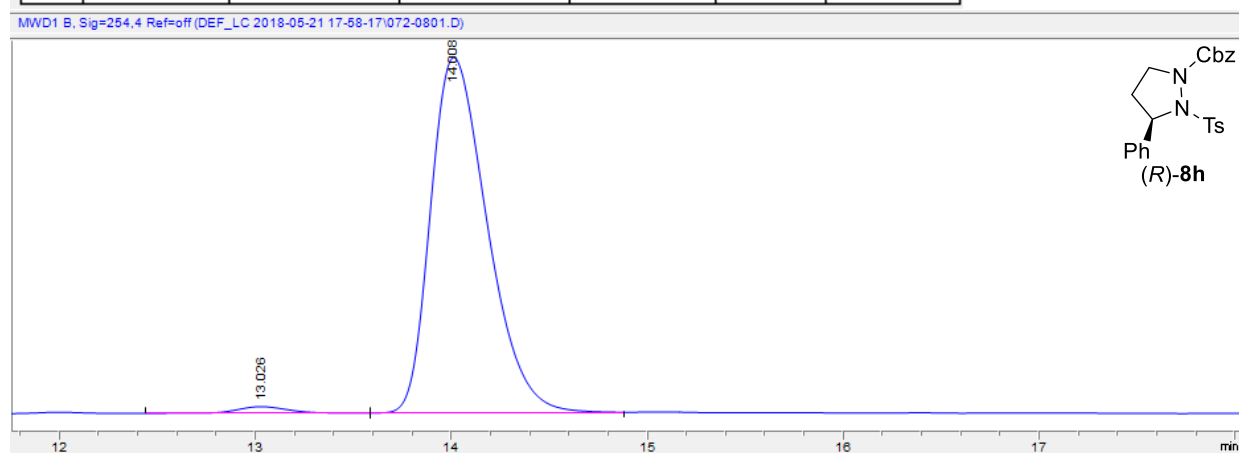

| # | Time   | Area   | Height | Width  | Area%  | Symmetry |
|---|--------|--------|--------|--------|--------|----------|
| 1 | 13.026 | 117.8  | 6.3    | 0.2853 | 1.699  | 0.869    |
| 2 | 14.008 | 6813.6 | 339.6  | 0.3121 | 98.301 | 0.652    |

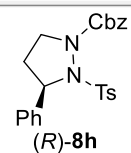

## HPLC profile of **8i**

Chiralpak IA column (0.46 cm ø x 25 cm) 90:10 hexane:propan-2-ol, T = 25 °C, flow rate = 1.0 mL/min.

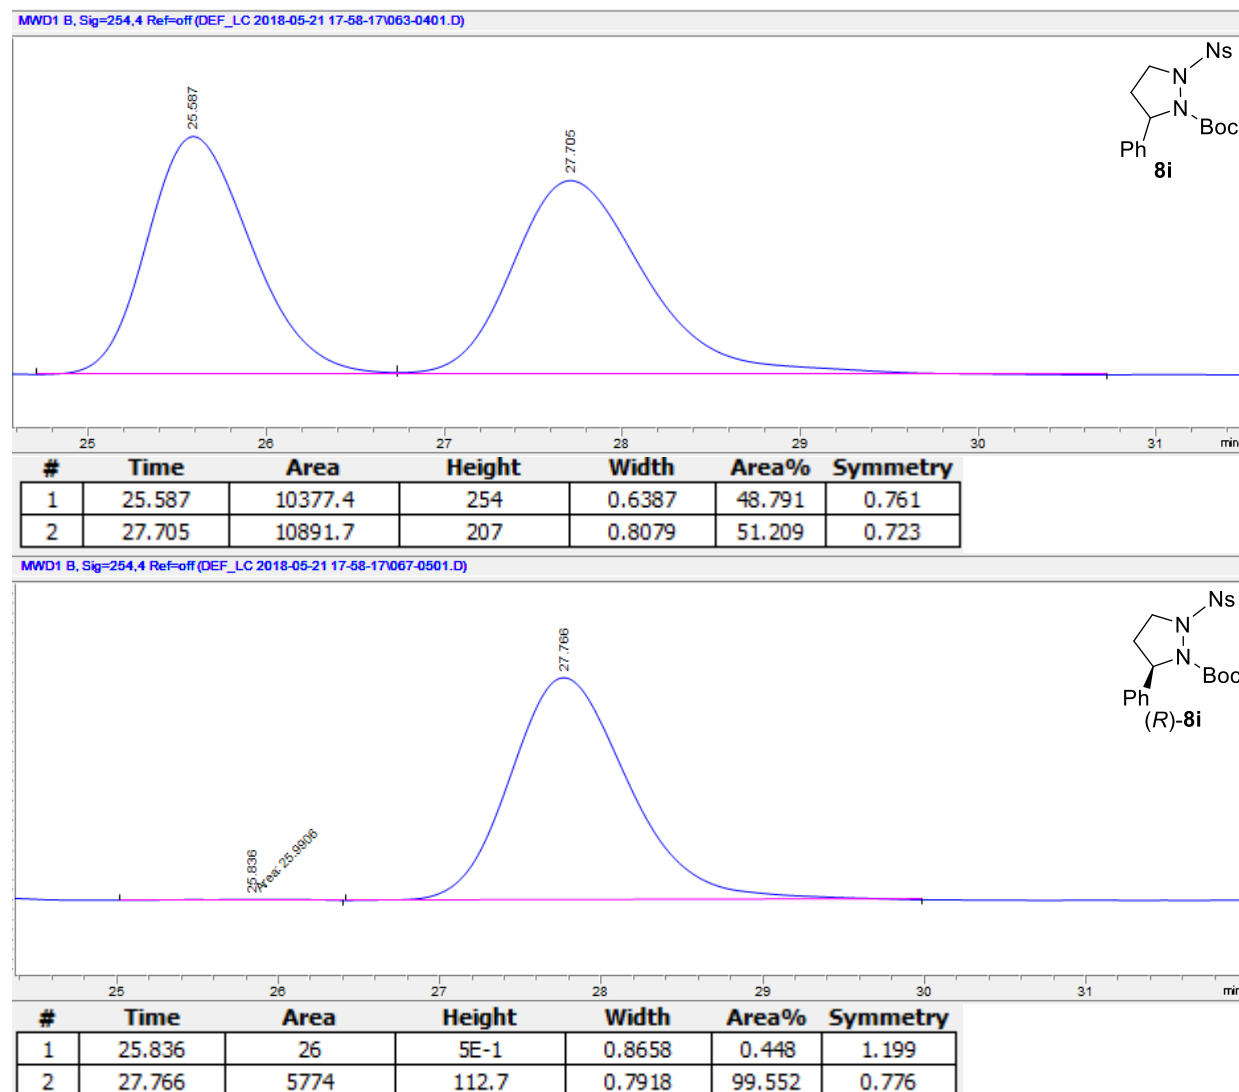

## HPLC profile of **8j**

Chiralpak IA column (4.6 cm ø x 250 cm), 95:5 hexane:propan-2-ol, T = 25°C, flow rate = 1.0 mL/min.

N.B. The racemic HPLC trace was generated by mixing the (*R*) and (*S*) enantiomers.

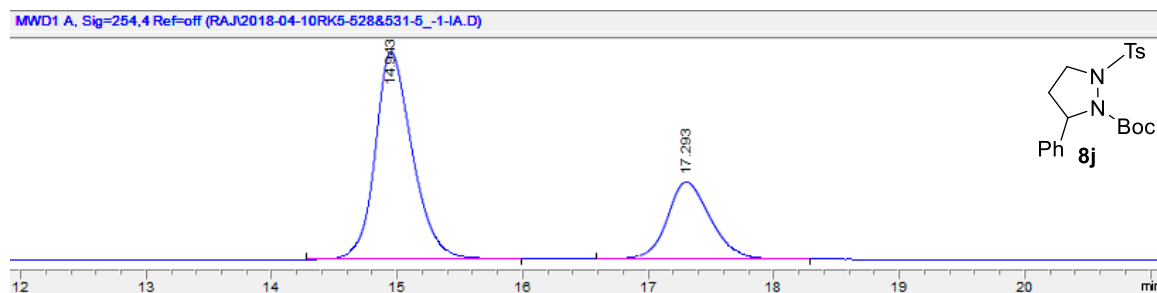

| # | Time   | Area   | Height | Width  | Area%  | Symmetry |
|---|--------|--------|--------|--------|--------|----------|
| 1 | 14.943 | 2899.7 | 140.8  | 0.3088 | 69.625 | 0.719    |
| 2 | 17.293 | 1265.1 | 52.5   | 0.3521 | 30.375 | 0.77     |

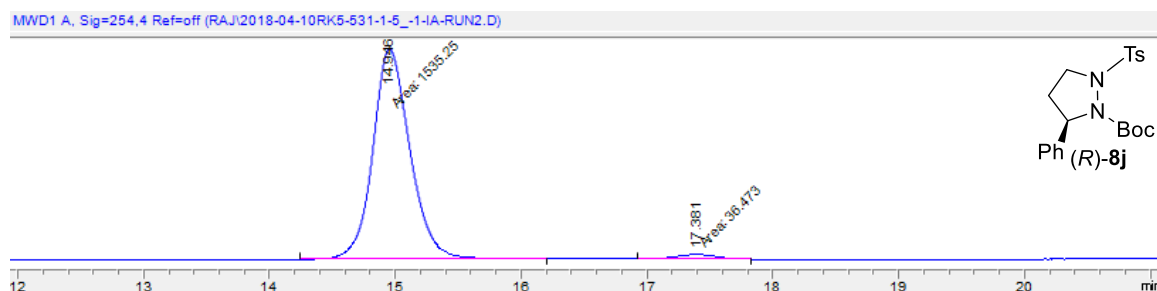

| # | Time   | Area   | Height | Width  | Area%  | Symmetry |
|---|--------|--------|--------|--------|--------|----------|
| 1 | 14.946 | 1535.2 | 74.7   | 0.3426 | 97.679 | 0.798    |
| 2 | 17.381 | 36.5   | 1.6    | 0.3732 | 2.321  | 1.044    |

## HPLC profile of **8k**

Chiralpak IA column (0.46 cm ø x 25 cm) 90:10 hexane:propan-2-ol, T = 25 °C, flow rate = 1.0 mL/min.

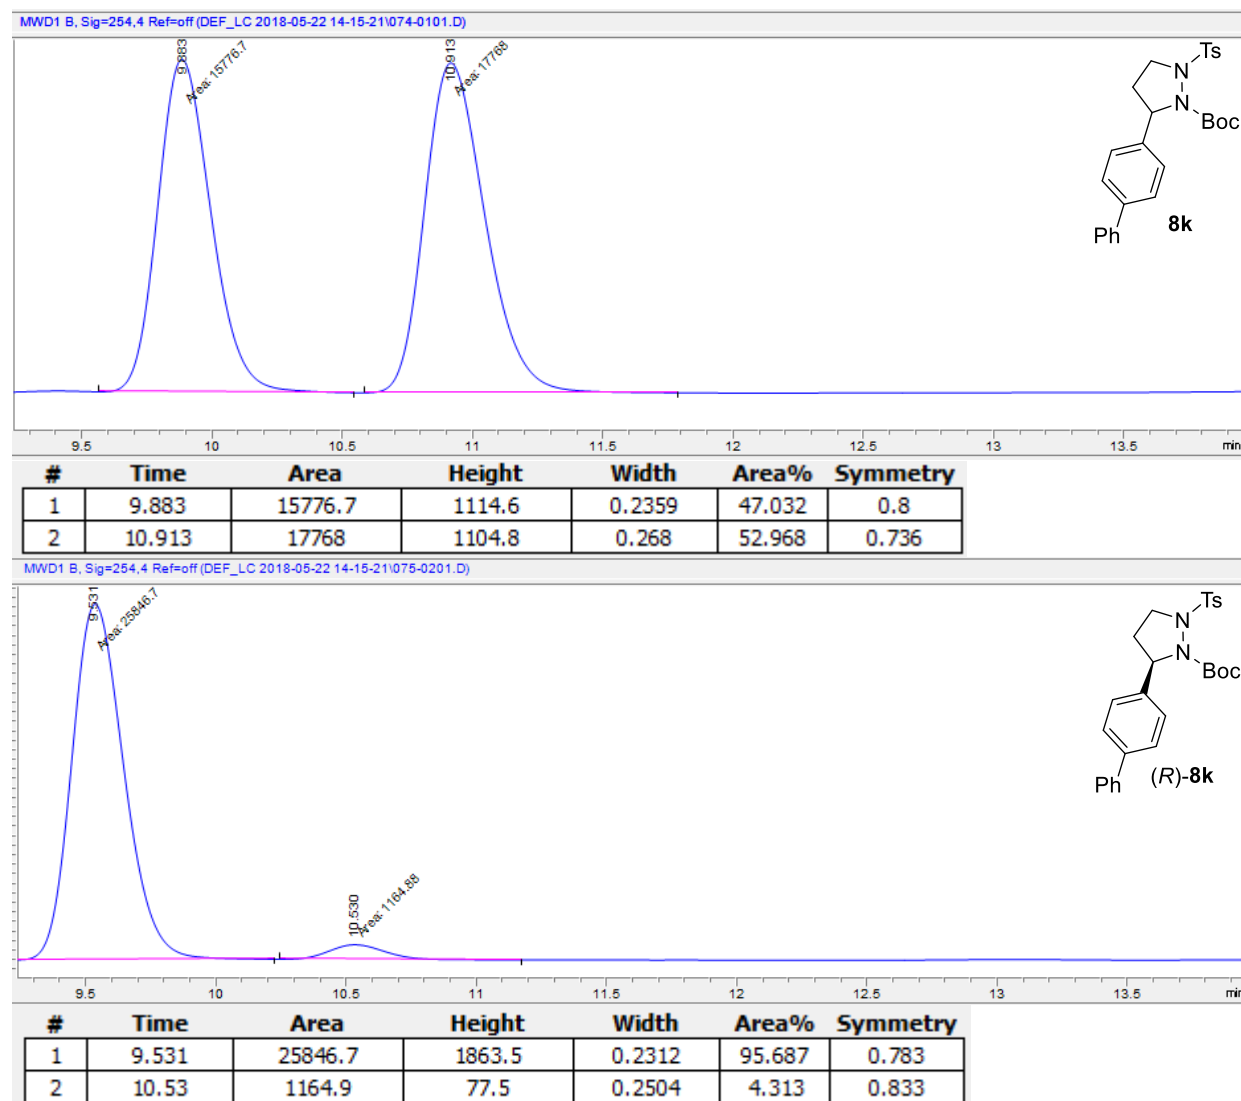



## HPLC profile of **8I**

Chiralpak OD-H column (0.46 cm ø x 25 cm) 95:5 hexane:propan-2-ol, T = 25 °C, flow rate = 1.0 mL/min.

N.B. The racemic HPLC trace was generated by mixing the (*R*) and (*S*) enantiomers.

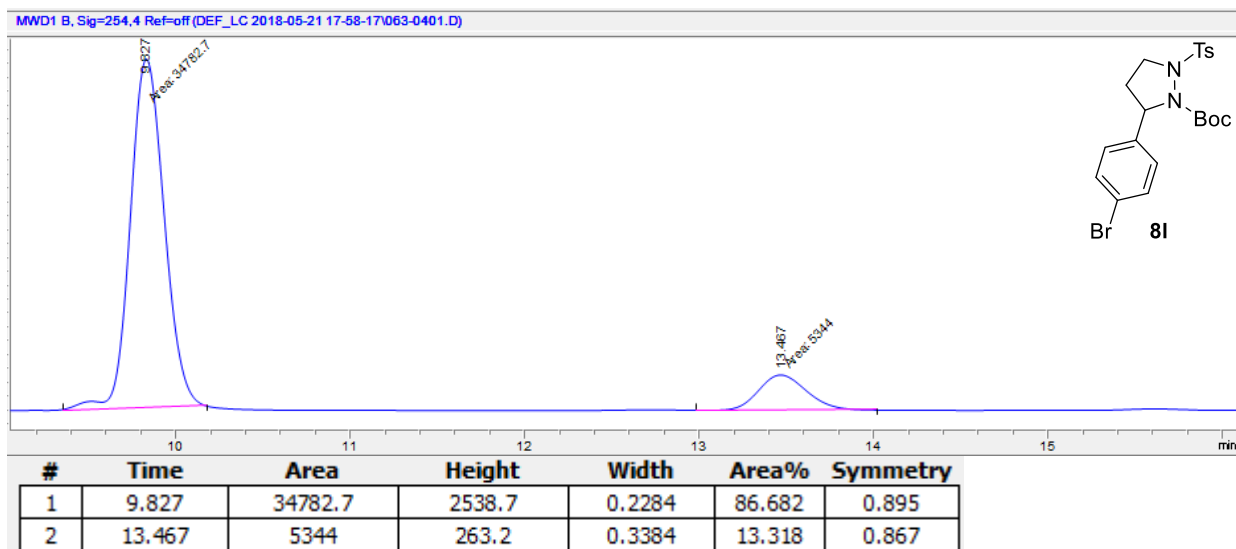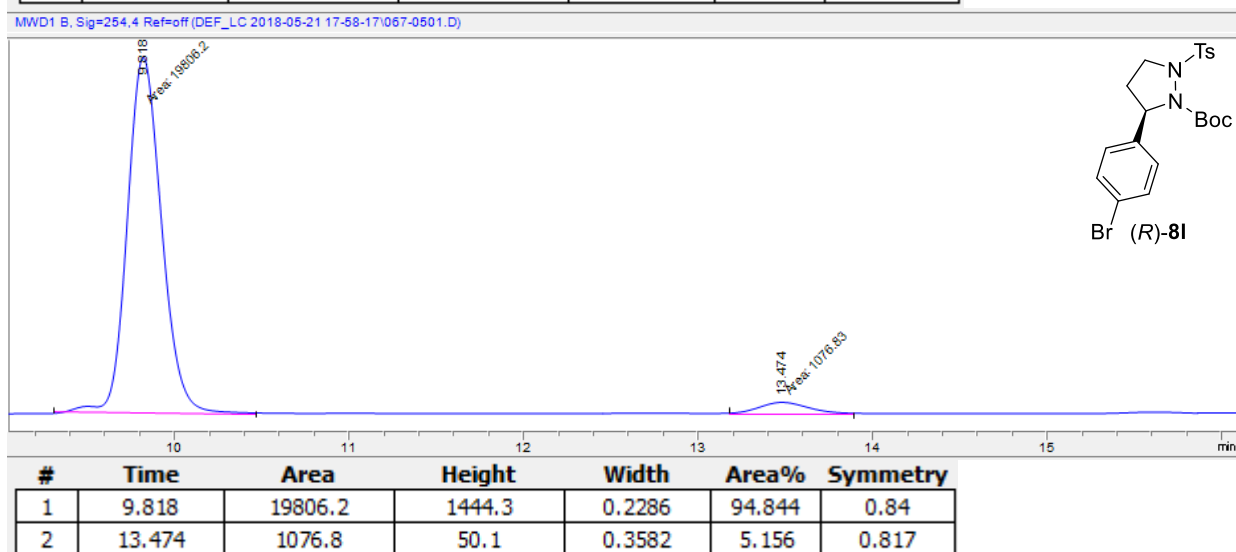

## HPLC profile of **8m**

Chiralpak IA column (0.46 cm ø x 25 cm) 97:3 hexane:propan-2-ol, T = 25 °C, flow rate = 1.0 mL/min.

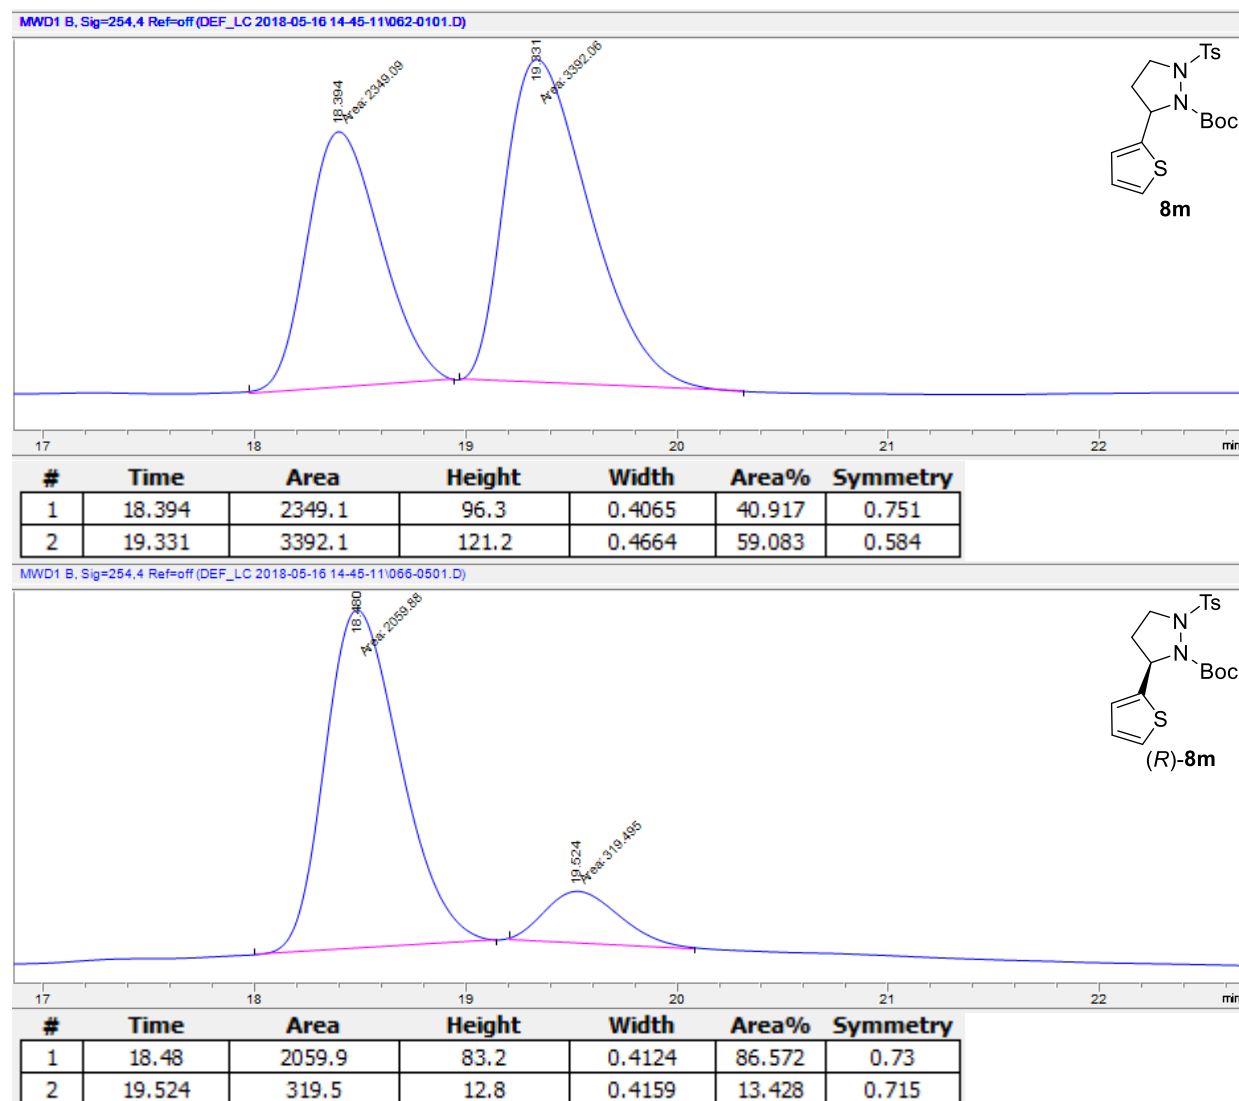

## HPLC profile of **8n**

Chiralpak IA column (0.46 cm ø x 25 cm), 95:5 hexane:propan-2-ol, T = 25°C, flow rate = 1.0 mL/min.

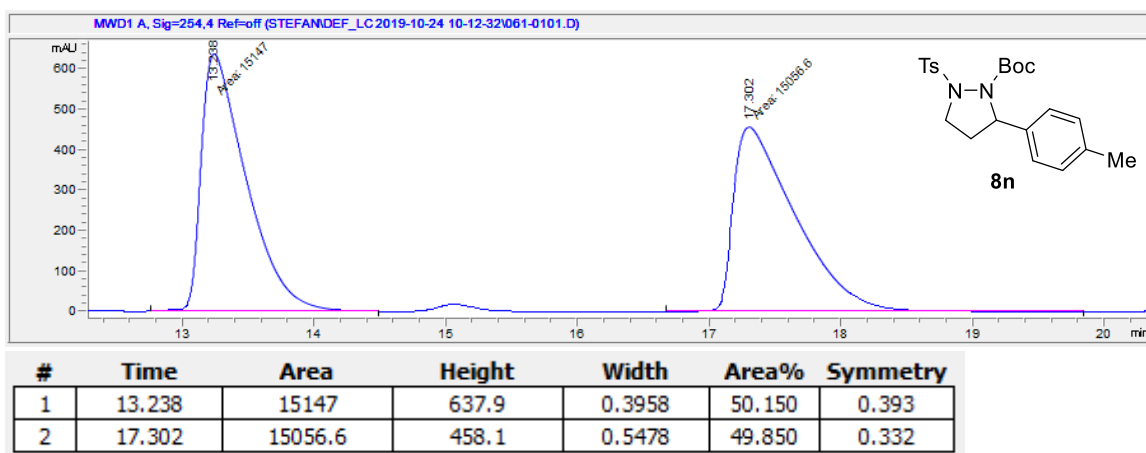

## Cyclisation with DEAD

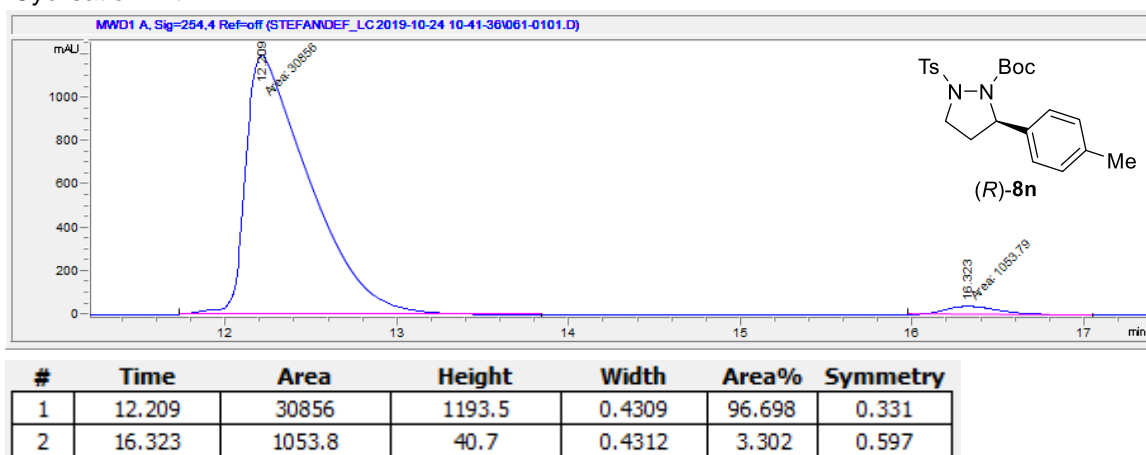

## Cyclisation with DIAD

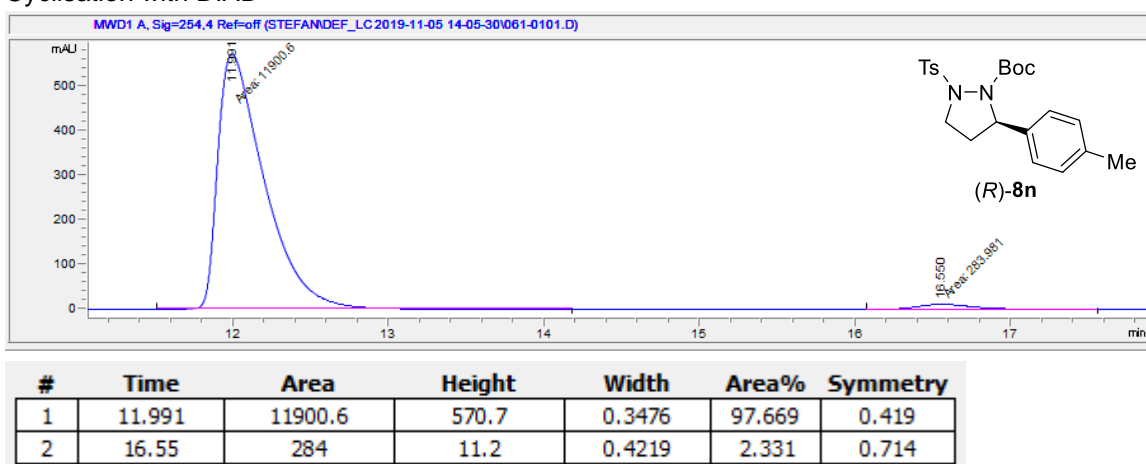

## Cyclisation with DIAD

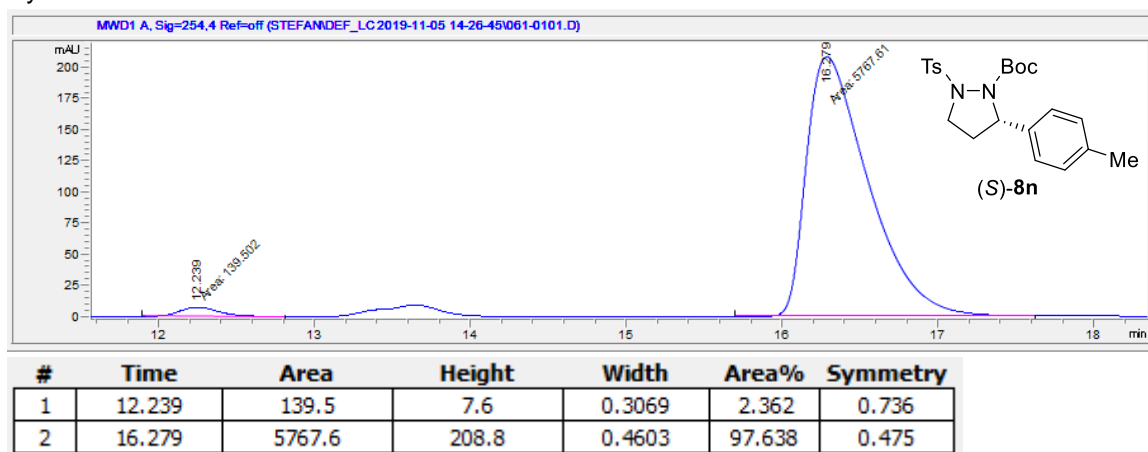

## HPLC profile of **8o**

Chiralpak IA column (0.46 cm ø x 25 cm), 90:10 hexane:propan-2-ol, T = 25°C, flow rate = 1.0 mL/min.

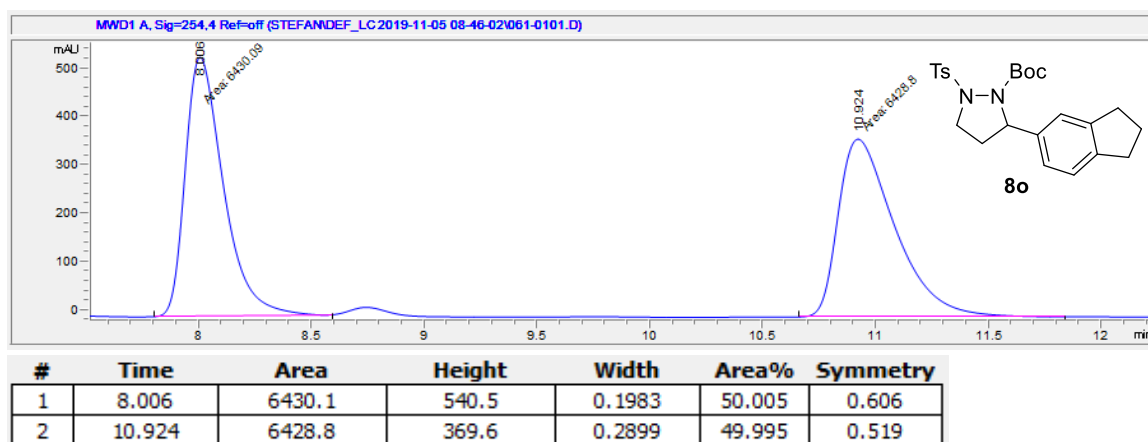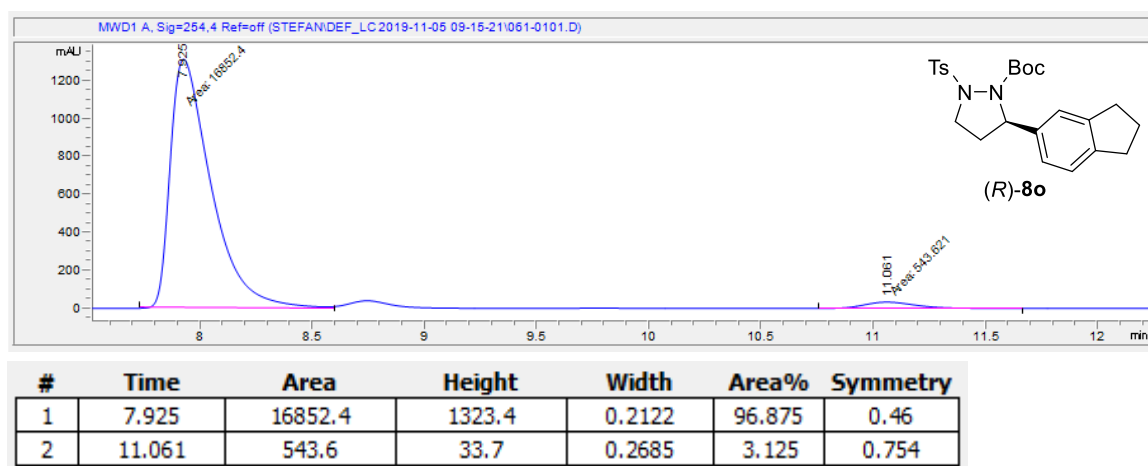

## HPLC traces of **8p**

Chiralpak OD-H column (0.46 cm ø x 25 cm) 99:1 hexane:propan-2-ol, T = 15 °C, flow rate = 1.0 mL/min.

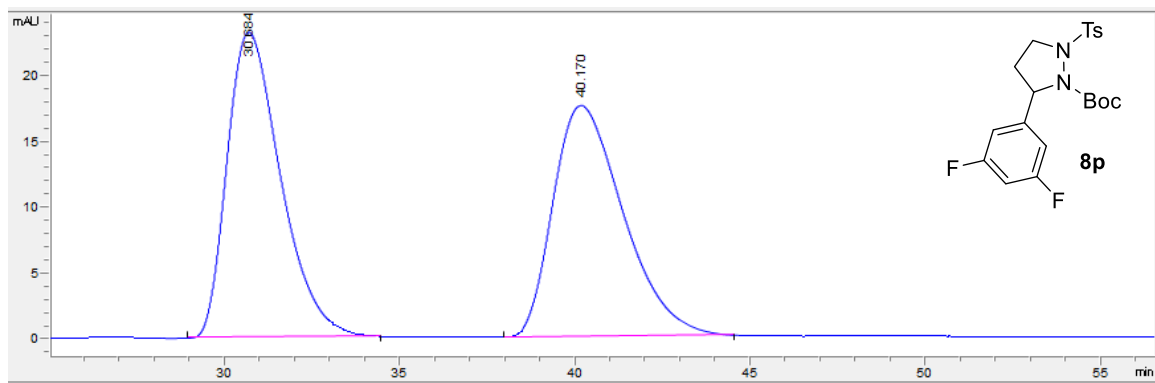

| # | Time   | Area   | Height | Width  | Area%  | Symmetry |
|---|--------|--------|--------|--------|--------|----------|
| 1 | 30.684 | 2487.5 | 23.4   | 1.5484 | 50.222 | 0.651    |
| 2 | 40.17  | 2465.5 | 17.7   | 1.6708 | 49.778 | 0.63     |

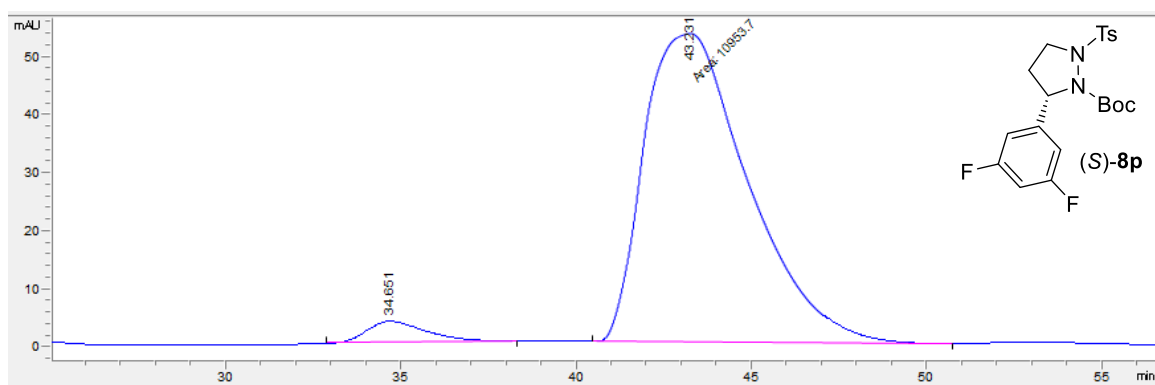

| # | Time   | Area    | Height | Width  | Area%  | Symmetry |
|---|--------|---------|--------|--------|--------|----------|
| 1 | 34.651 | 437.3   | 3.7    | 1.4013 | 3.839  | 0.613    |
| 2 | 43.231 | 10953.7 | 53.1   | 3.4409 | 96.161 | 0.733    |

## HPLC profile of **8q**

Chiralpak OD-H column (0.46 cm ø x 25 cm), 90:10 hexane:propan-2-ol, T = 25°C, flow rate = 1.0 mL/min.

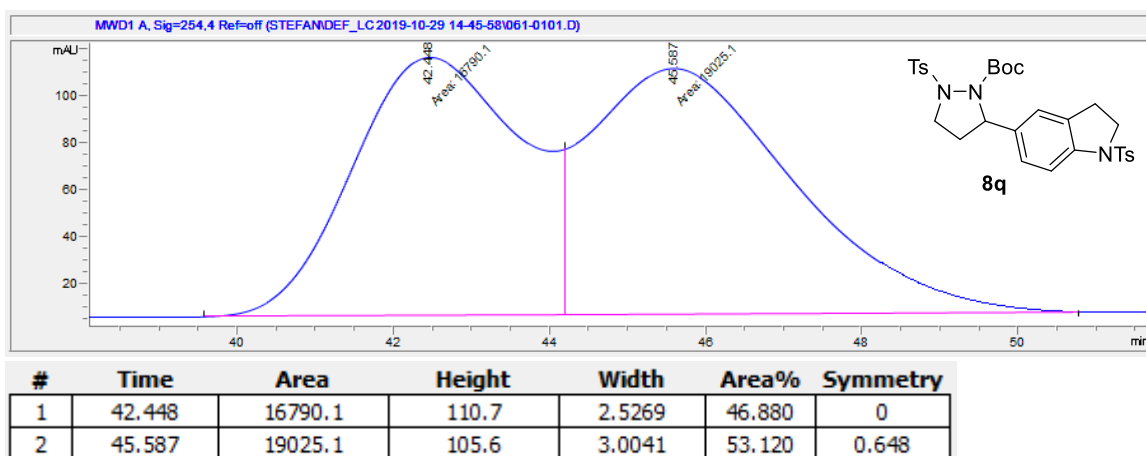

## Cyclisation with DEAD

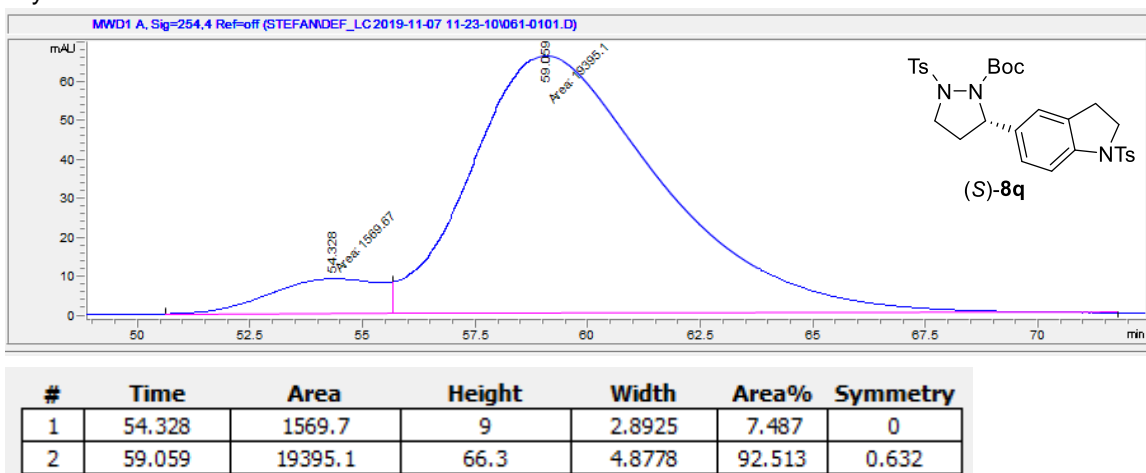

## Cyclisation with DIAD

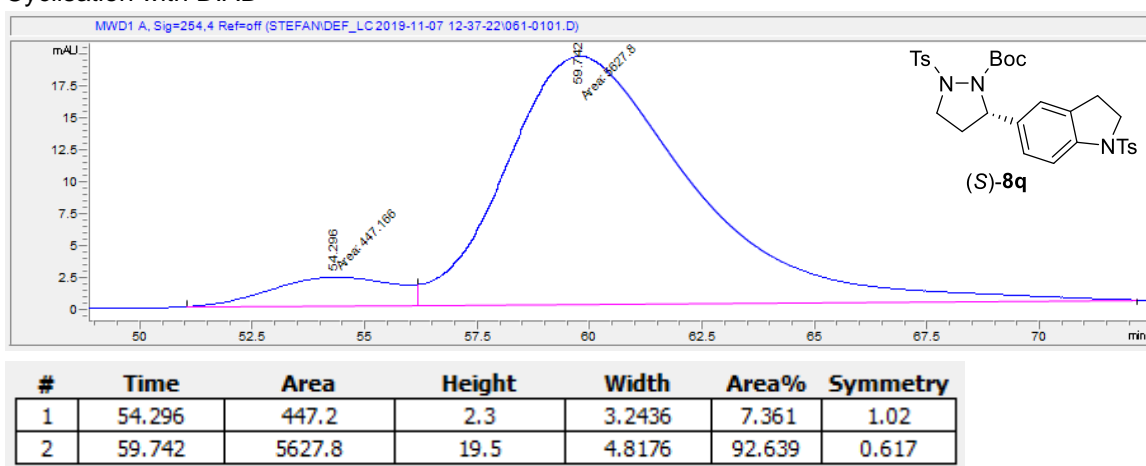

## HPLC profile of compound **8r**

Chiralpak IA column (0.46 cm ø x 25 cm) 98.5:1.5 hexane:propan-2-ol, T = 25 °C, flow rate 1.0 mL/min.

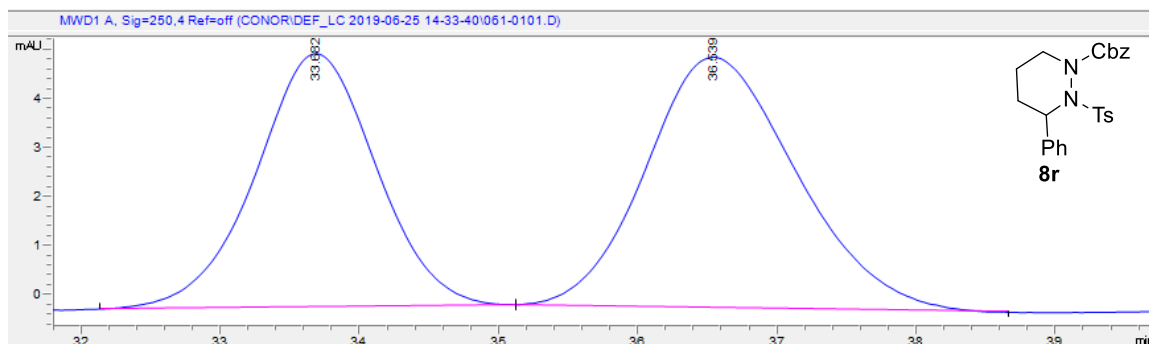

| # | Time   | Area  | Height | Width  | Area%  | Symmetry |
|---|--------|-------|--------|--------|--------|----------|
| 1 | 33.682 | 312.1 | 5.2    | 0.8328 | 44.629 | 0.993    |
| 2 | 36.539 | 387.3 | 5.1    | 0.9262 | 55.371 | 0.8      |

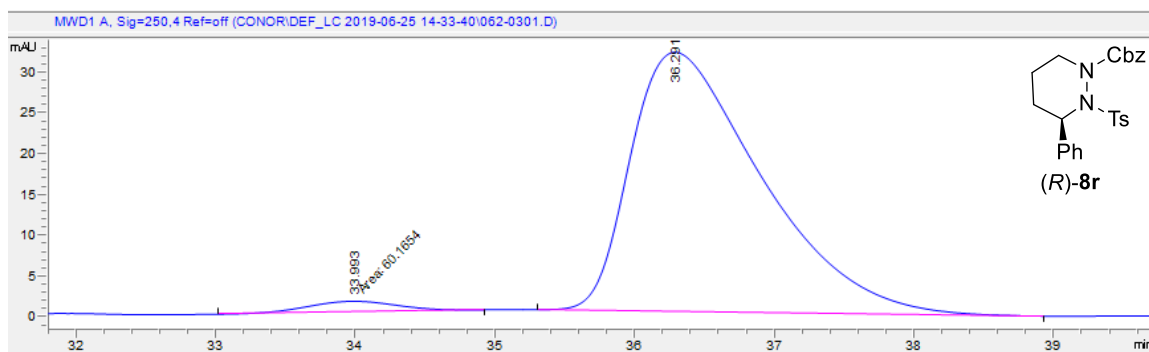

| # | Time   | Area   | Height | Width  | Area%  | Symmetry |
|---|--------|--------|--------|--------|--------|----------|
| 1 | 33.993 | 60.2   | 1.3    | 0.5574 | 2.829  | 1.134    |
| 2 | 36.291 | 2066.8 | 31.6   | 0.9822 | 97.171 | 0.486    |



# HPLC profile of compound **8s**

Chiralpak OD-H column (0.46 cm ø x 25 cm) 98:2 hexane:propan-2-ol, T = 25 °C, flow rate 1.0 mL/min.

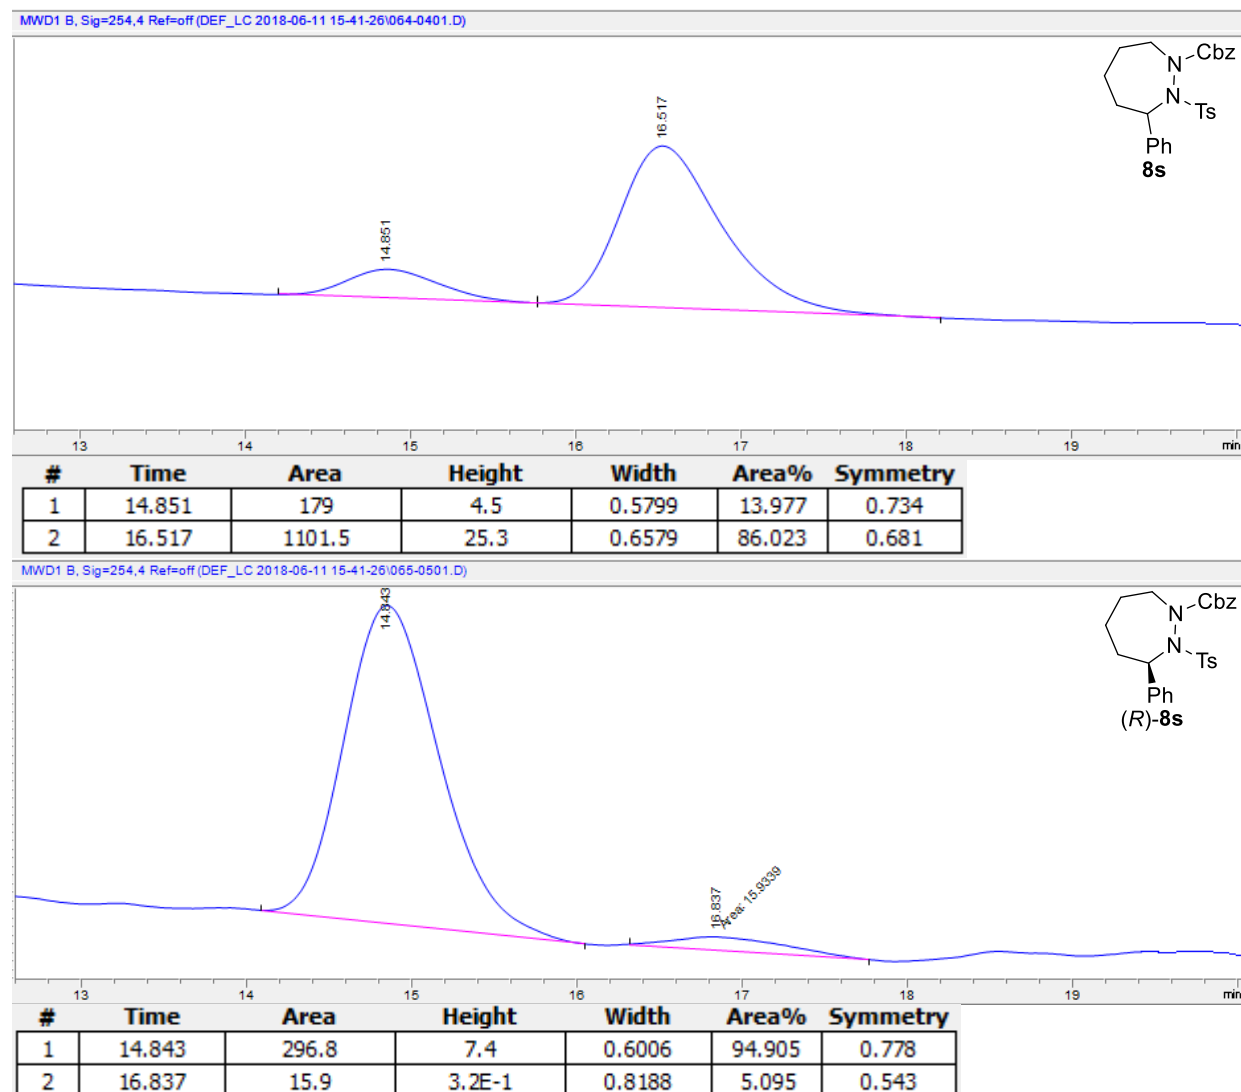

## HPLC profile of **8t**

Chiralpak OD-H column (0.46 cm ø x 25 cm), 98:2 hexane:propan-2-ol, T = 25 °C, flow rate = 1.0 mL/min.

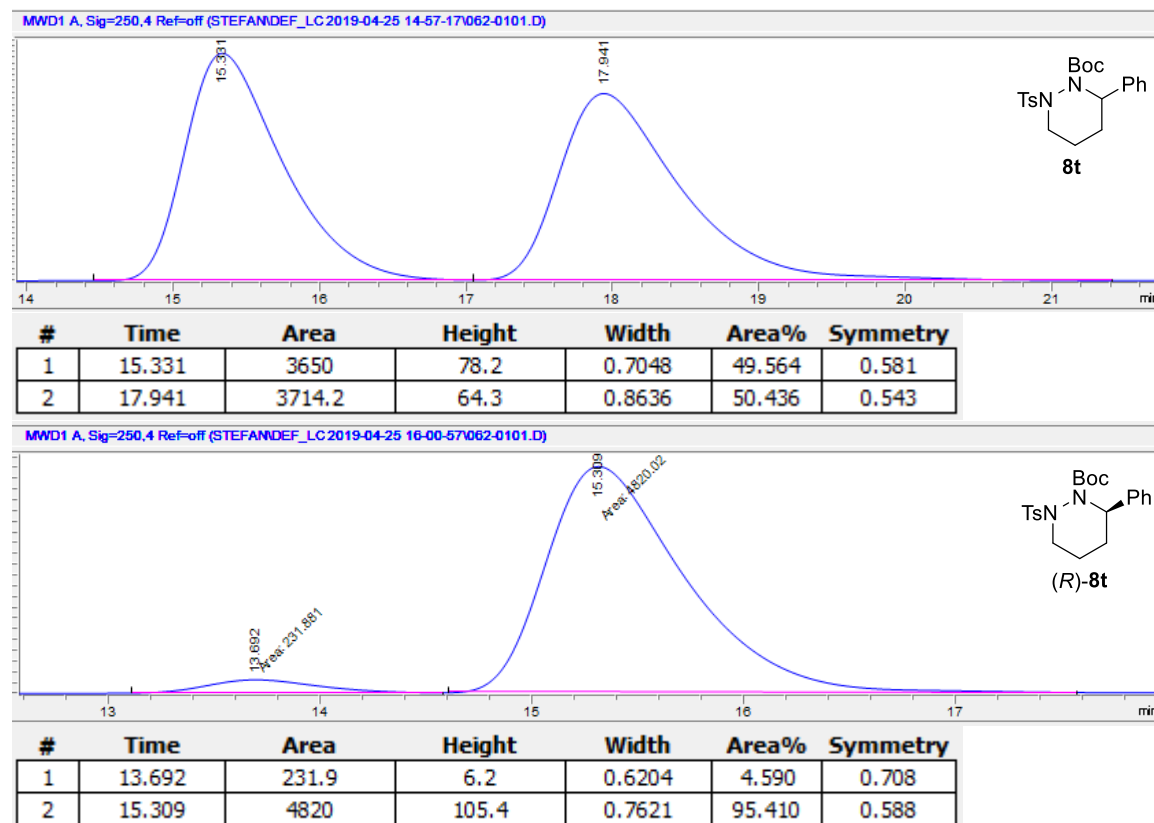

## HPLC profile of **8u**

Chiralpak IA column (0.46 cm ø x 25 cm), 98:2 hexane:propan-2-ol, T = 25 °C, flow rate = 1.0 mL/min.

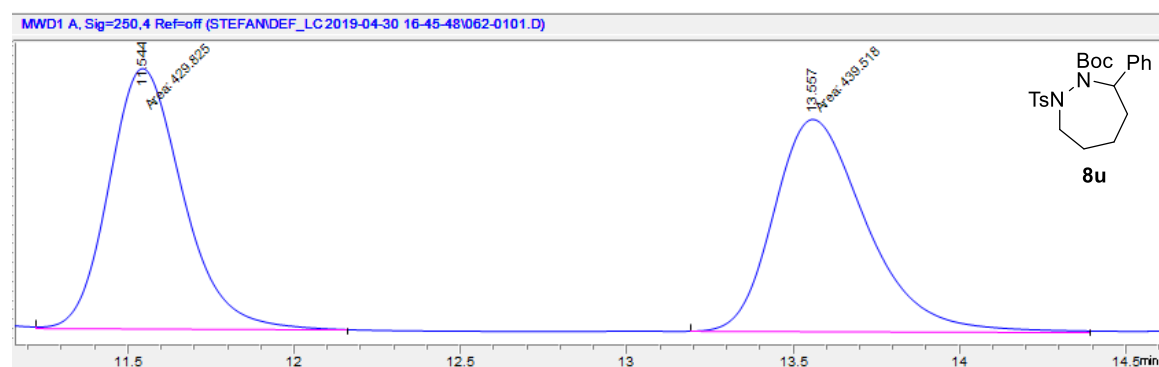

| # | Time   | Area  | Height | Width  | Area%  | Symmetry |
|---|--------|-------|--------|--------|--------|----------|
| 1 | 11.544 | 429.8 | 27.7   | 0.259  | 49.442 | 0.803    |
| 2 | 13.557 | 439.5 | 22.5   | 0.3251 | 50.558 | 0.698    |

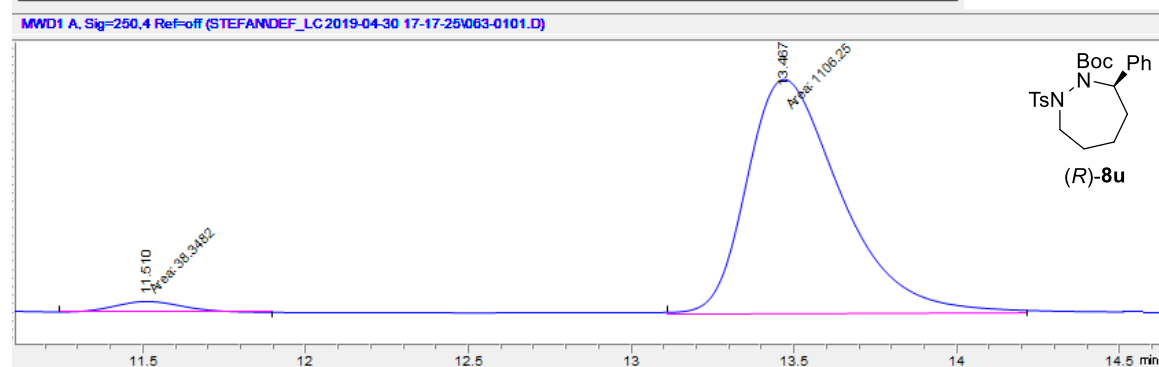

| # | Time   | Area   | Height | Width  | Area%  | Symmetry |
|---|--------|--------|--------|--------|--------|----------|
| 1 | 11.51  | 38.3   | 2.5    | 0.2524 | 3.350  | 0.825    |
| 2 | 13.467 | 1106.3 | 54.8   | 0.3362 | 96.650 | 0.633    |

## HPLC profile of **8v**

Chiralpak IA column (0.46 cm ø x 25 cm), 99.2:0.8 hexane:propan-2-ol, T = 25 °C, flow rate = 1.0 mL/min.

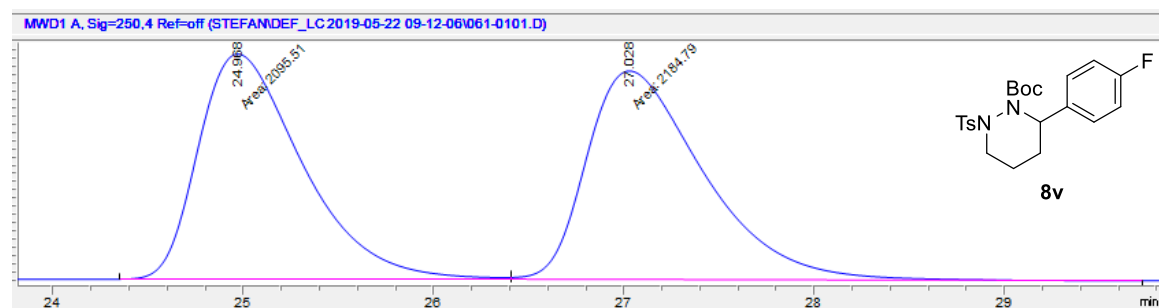

| # | Time   | Area   | Height | Width  | Area%  | Symmetry |
|---|--------|--------|--------|--------|--------|----------|
| 1 | 24.968 | 2095.5 | 54.9   | 0.6367 | 48.957 | 0        |
| 2 | 27.028 | 2184.8 | 50.9   | 0.7158 | 51.043 | 0.56     |

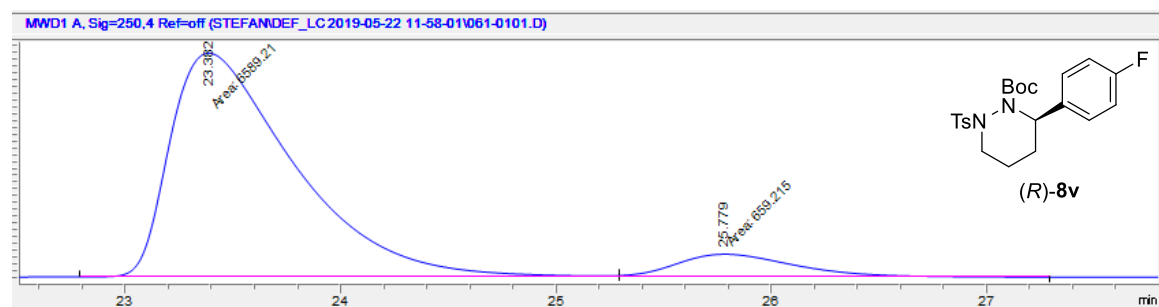

| # | Time   | Area   | Height | Width  | Area%  | Symmetry |
|---|--------|--------|--------|--------|--------|----------|
| 1 | 23.382 | 6589.2 | 164.1  | 0.6692 | 90.905 | 0        |
| 2 | 25.779 | 659.2  | 16.8   | 0.6527 | 9.095  | 0.657    |

## HPLC profiles of functionalised hydrazines **10b**, **10d** and **10i** and **10o**

### HPLC profile of compound **10b**

Chiralpak IA (0.46 cm ø x 25 cm) column, 90:10 Hexane:propan-2-ol, T = 25 °C, flow rate = 1.0 mL/min.

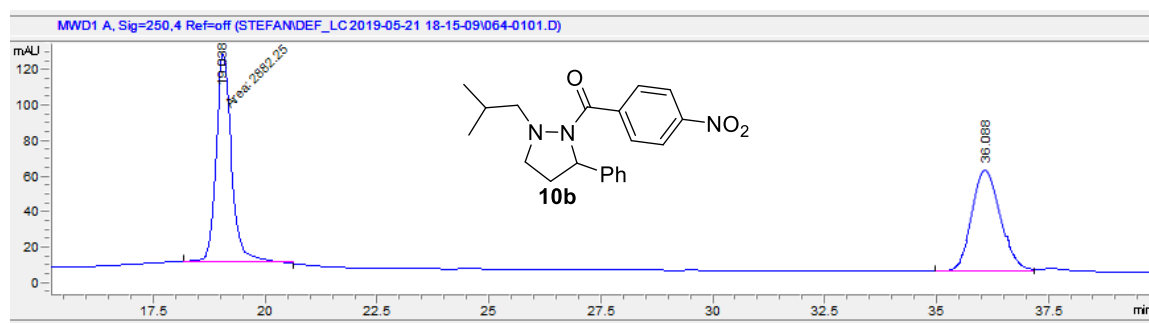

| # | Time   | Area   | Height | Width  | Area%  | Symmetry |
|---|--------|--------|--------|--------|--------|----------|
| 1 | 19.038 | 2882.2 | 117.7  | 0.4082 | 52.816 | 0.816    |
| 2 | 36.088 | 2574.9 | 57.5   | 0.6948 | 47.184 | 0.849    |

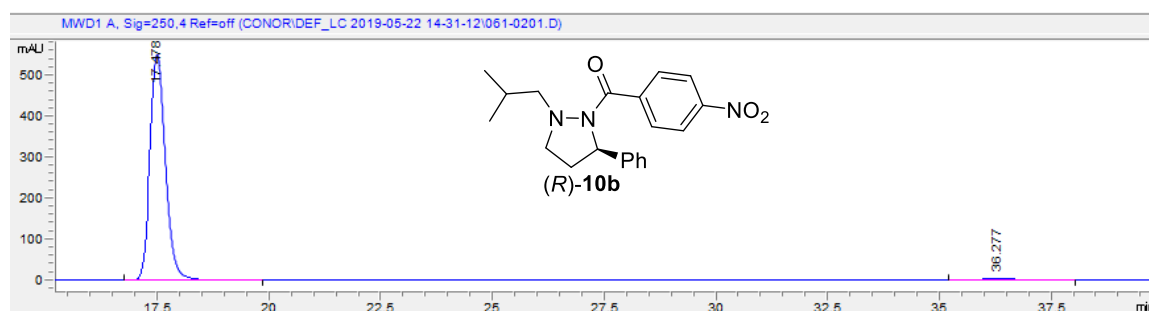

| # | Time   | Area    | Height | Width  | Area%  | Symmetry |
|---|--------|---------|--------|--------|--------|----------|
| 1 | 17.478 | 13396.2 | 554.8  | 0.3737 | 97.868 | 0.78     |
| 2 | 36.277 | 291.8   | 5.5    | 0.751  | 2.132  | 0.805    |

## HPLC profile of compound **10d**

Chiralpak IA column (0.46 cm ø x 25 cm), 99:1 hexane:propan-2-ol, T = 25 °C, flow rate 1.0 mL/min.

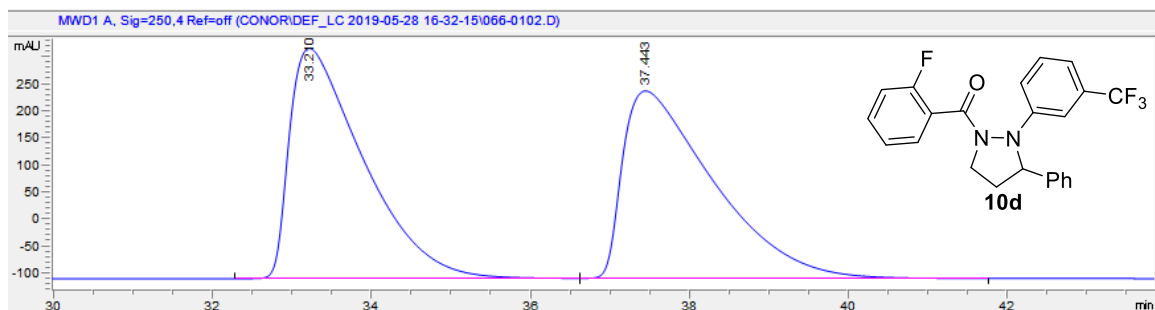

| # | Time   | Area    | Height | Width  | Area%  | Symmetry |
|---|--------|---------|--------|--------|--------|----------|
| 1 | 33.21  | 27393.1 | 424.6  | 0.9567 | 49.997 | 0.339    |
| 2 | 37.443 | 27396.3 | 345.6  | 1.1707 | 50.003 | 0.31     |

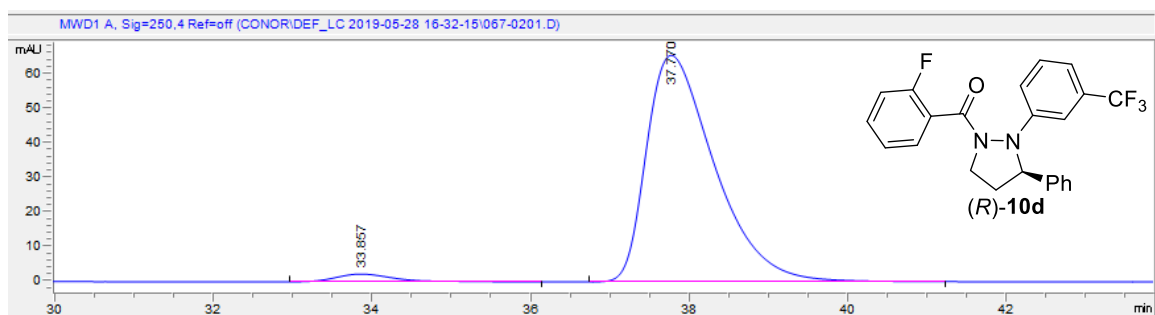

| # | Time   | Area   | Height | Width  | Area%  | Symmetry |
|---|--------|--------|--------|--------|--------|----------|
| 1 | 33.857 | 117.6  | 2.3    | 0.6426 | 2.901  | 0.721    |
| 2 | 37.77  | 3934.5 | 65.9   | 0.9085 | 97.099 | 0.532    |

## HPLC profile of **10i**

Chiralpak IA column (0.46 cm ø x 25 cm), 96:4 hexane:propan-2-ol, T = 25 °C, flow rate = 1.0 mL/min.

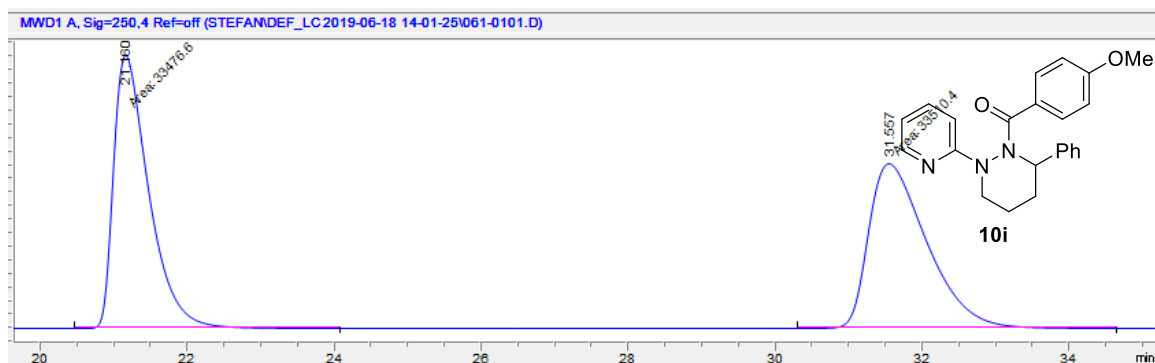

| # | Time   | Area    | Height | Width  | Area%  | Symmetry |
|---|--------|---------|--------|--------|--------|----------|
| 1 | 21.16  | 33476.6 | 1005.1 | 0.5551 | 49.975 | 0.504    |
| 2 | 31.557 | 33510.4 | 606.3  | 0.9212 | 50.025 | 0.522    |

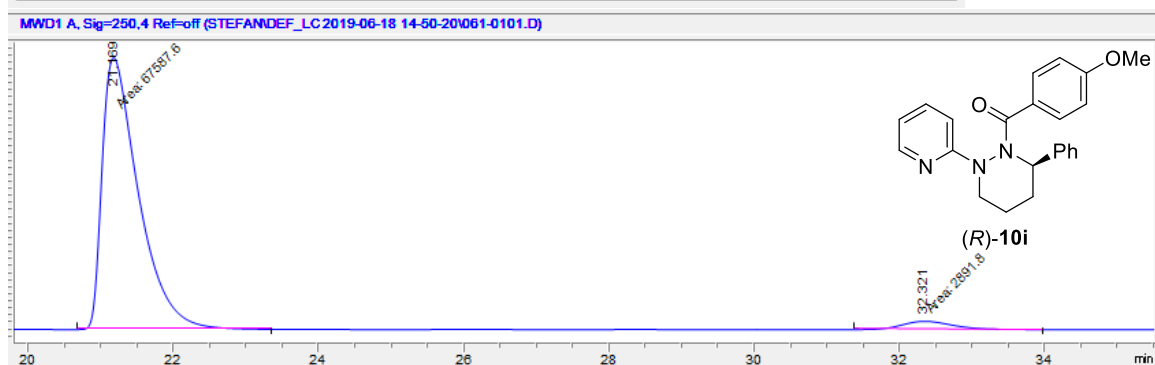

| # | Time   | Area    | Height | Width | Area%  | Symmetry |
|---|--------|---------|--------|-------|--------|----------|
| 1 | 21.169 | 67587.6 | 1942.2 | 0.58  | 95.897 | 0.441    |
| 2 | 32.321 | 2891.8  | 59.2   | 0.814 | 4.103  | 0.779    |

## HPLC profile of **10o**

Chiralpak OD-H column (0.46 cm ø x 25 cm), 98:2 hexane:propan-2-ol, T = 25 °C, flow rate = 1.0 mL/min.

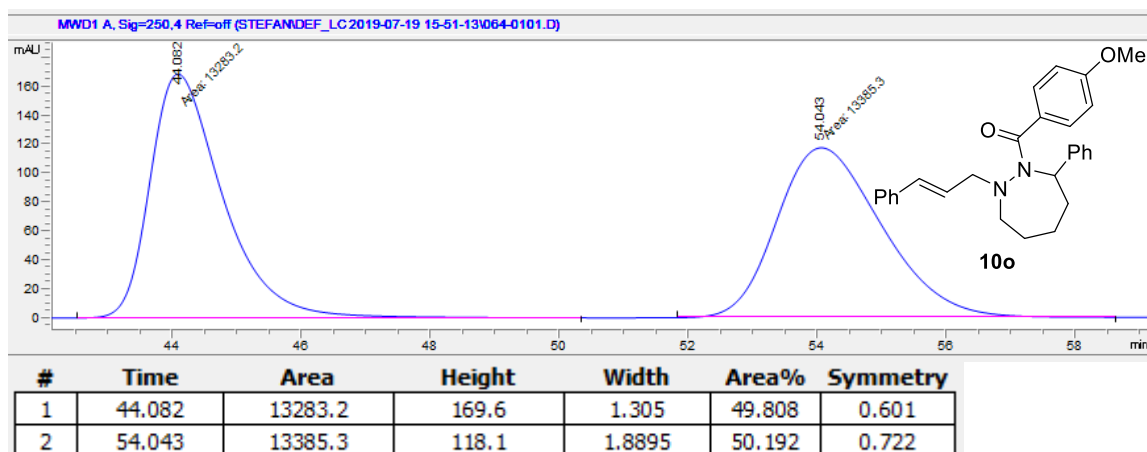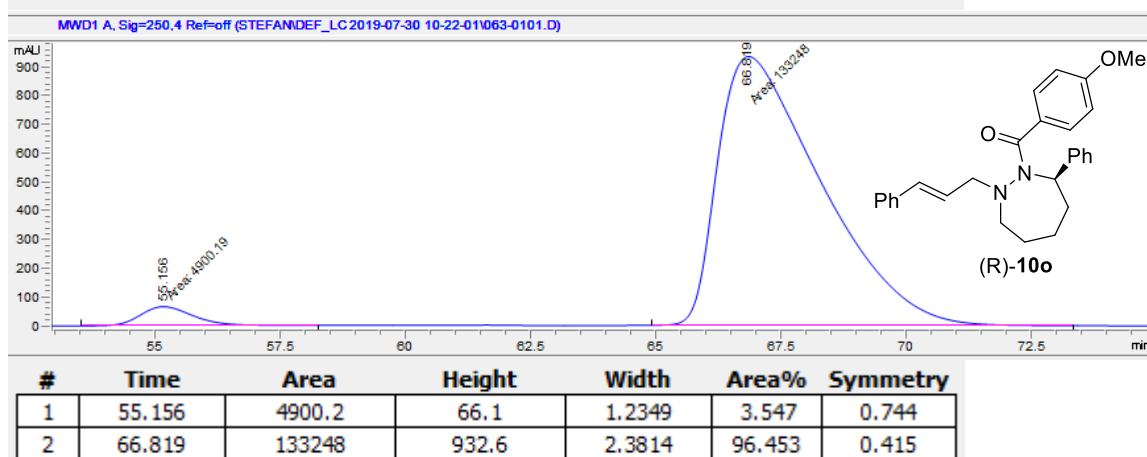



# <sup>1</sup>H and <sup>13</sup>C NMR Spectra of 4b, 5a-v, 6a-v, 8a-v, 10a-q and 12

<sup>1</sup>H NMR  
500 MHz, CDCl<sub>3</sub>  
4b

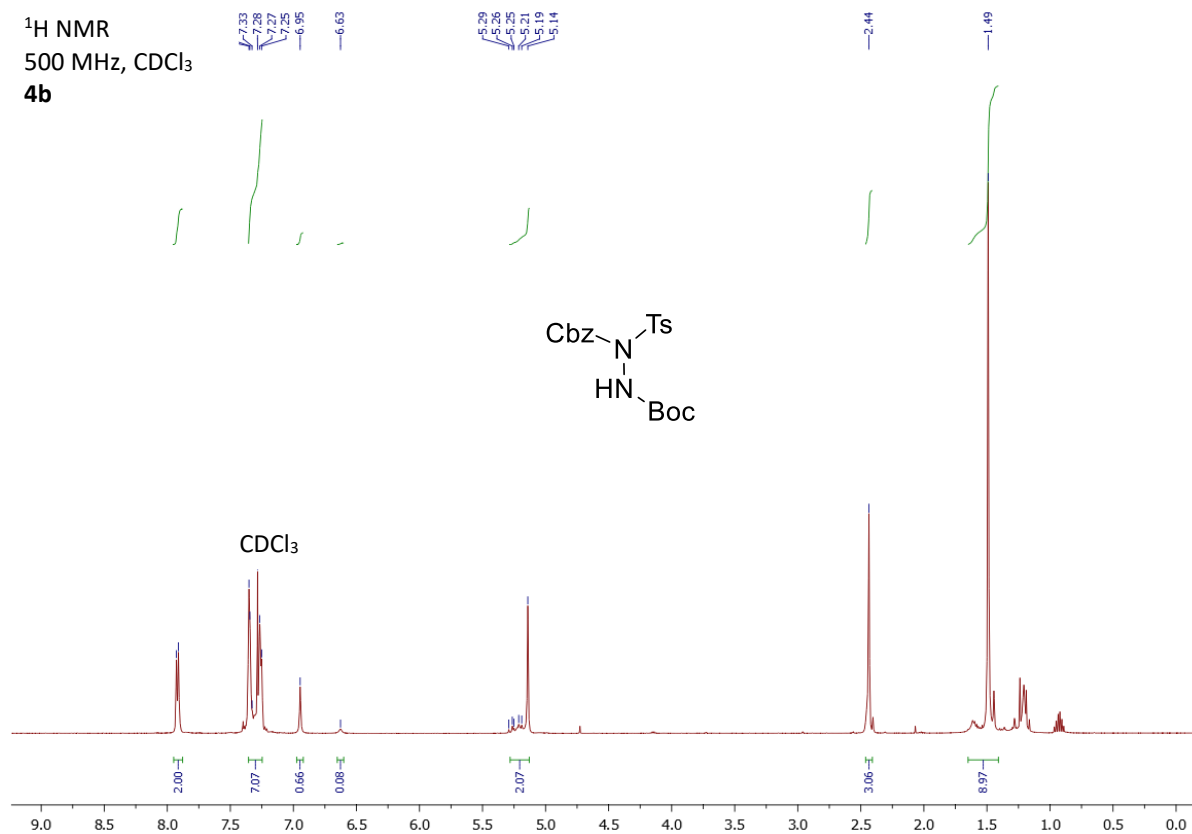

<sup>13</sup>C NMR  
125 MHz, CDCl<sub>3</sub>  
4b

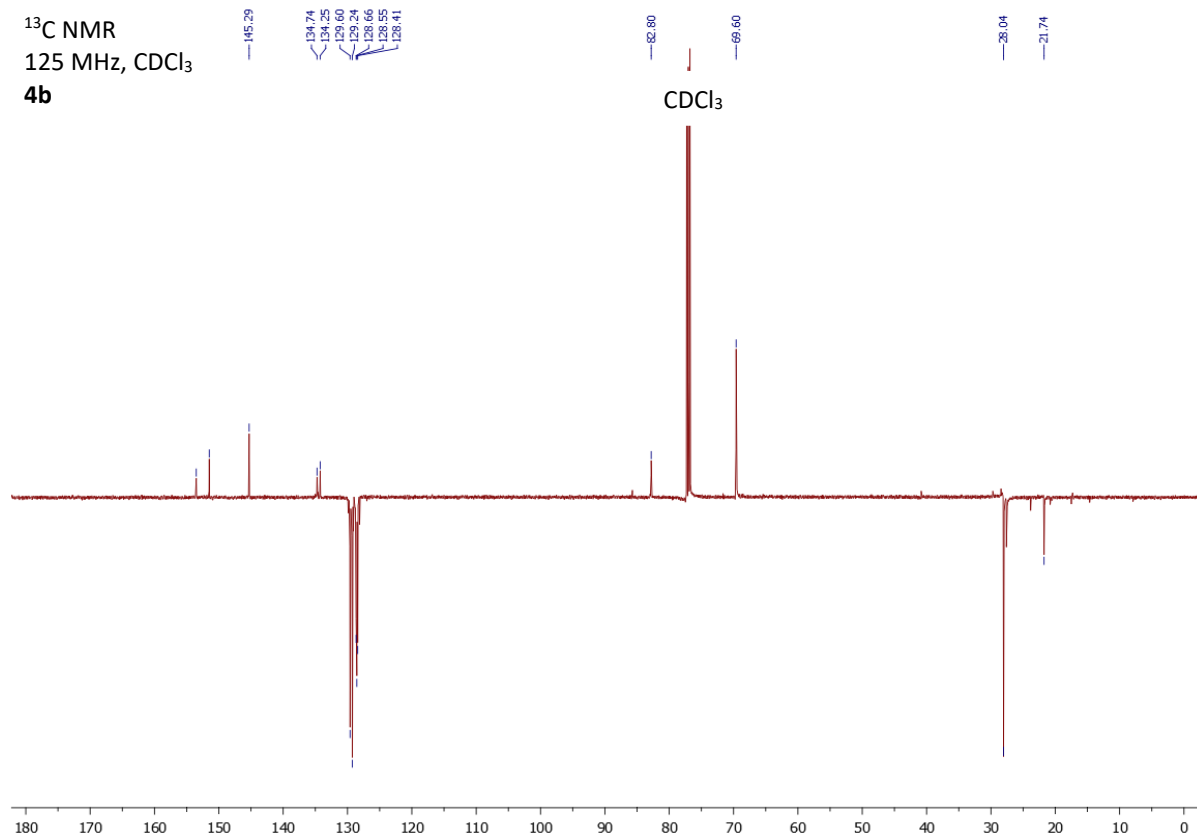

<sup>1</sup>H NMR  
400 MHz, CDCl<sub>3</sub>  
**5a**

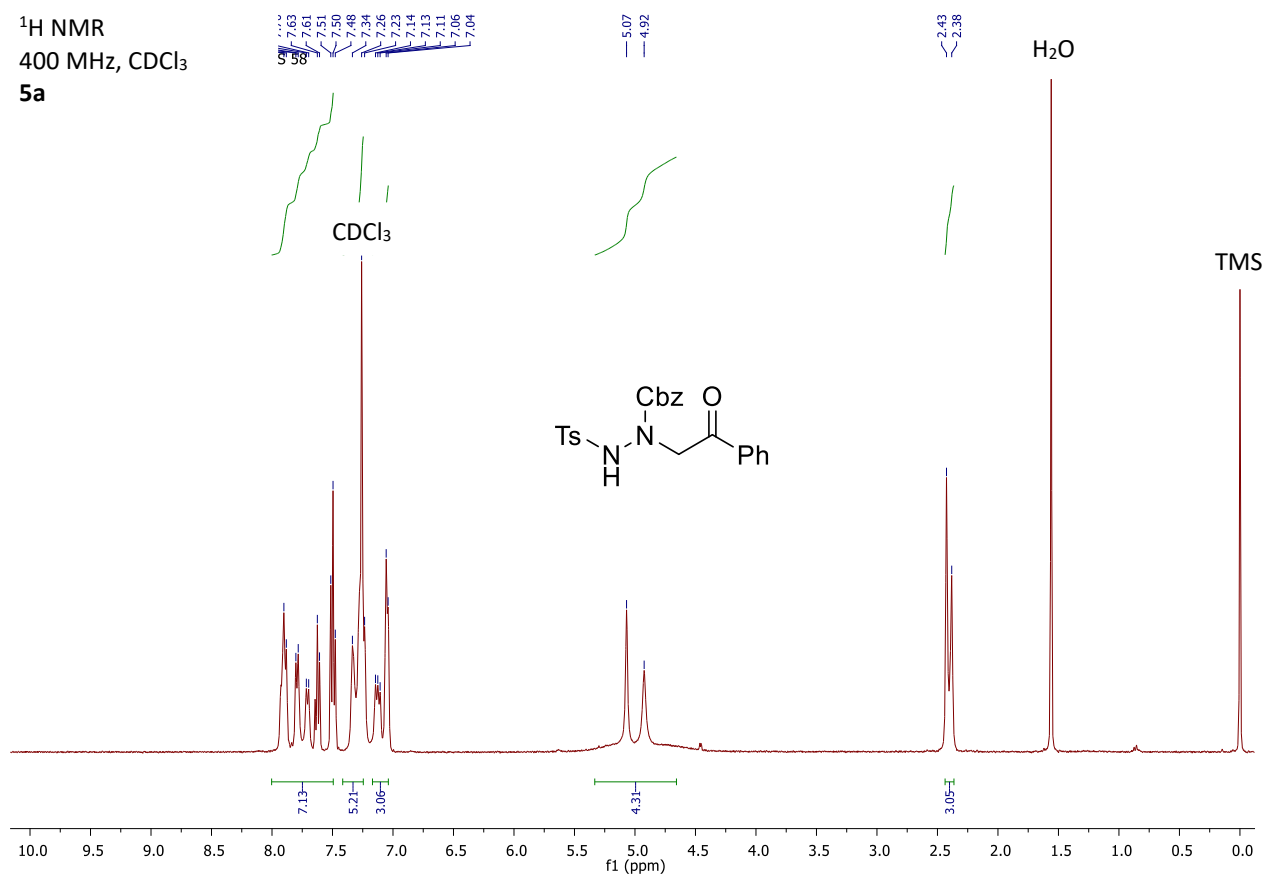

<sup>13</sup>C NMR  
100 MHz, CDCl<sub>3</sub>  
**5a**

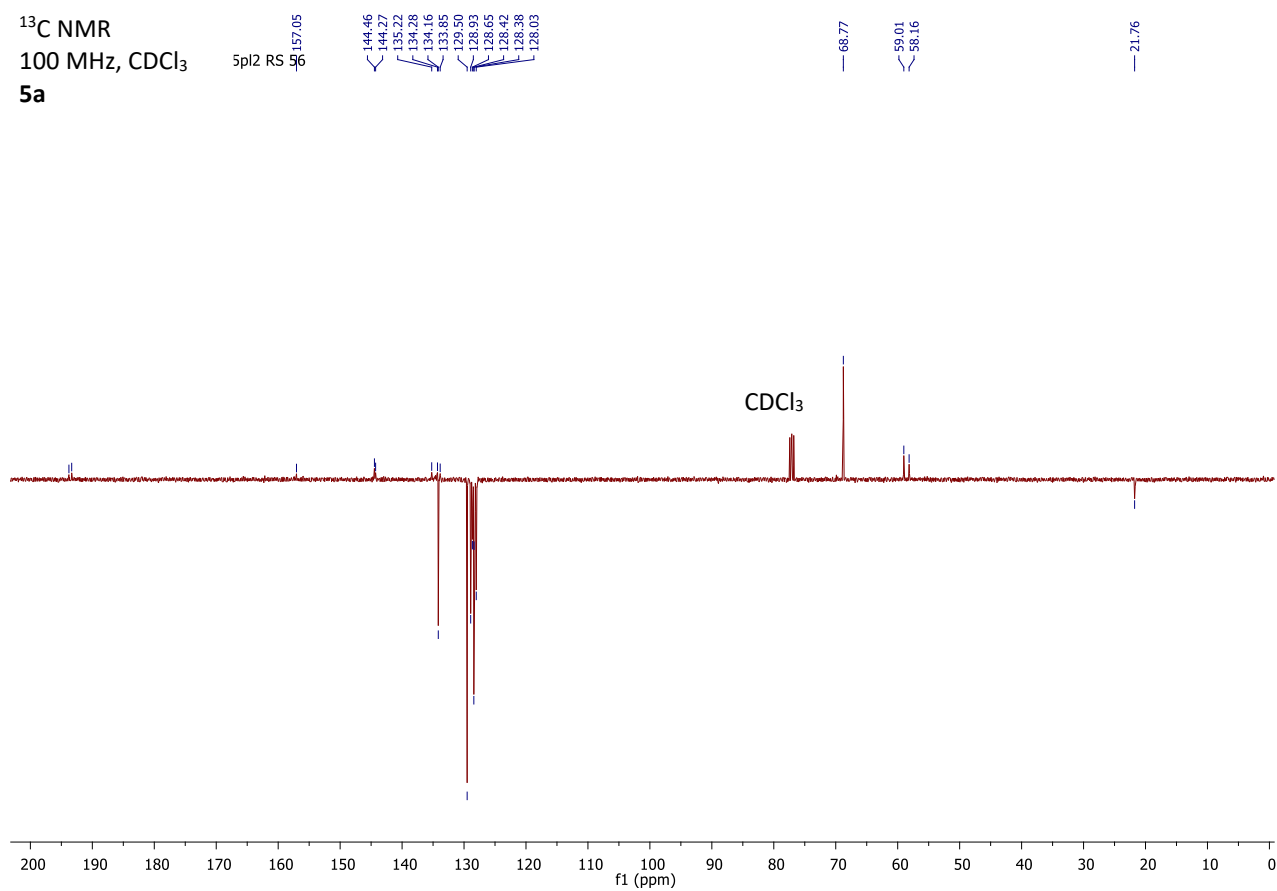

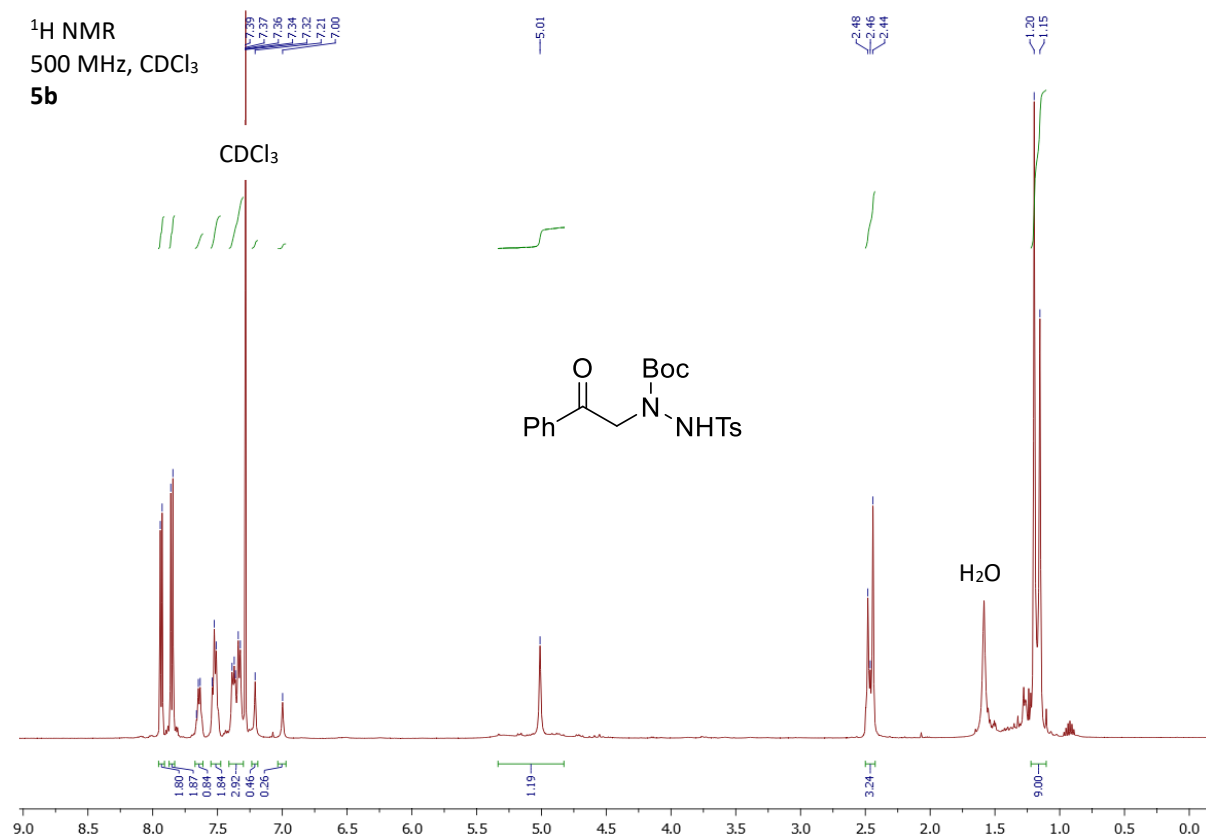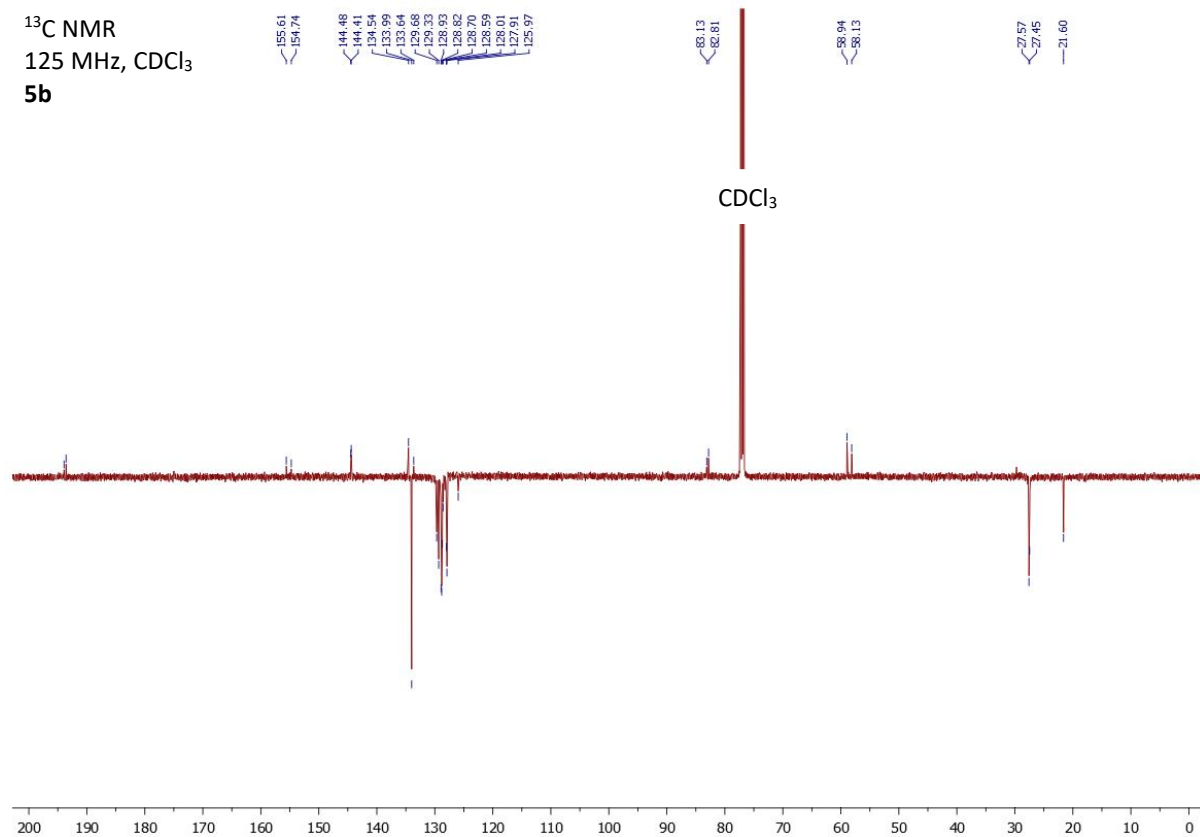

<sup>1</sup>H NMR  
500 MHz, d6-DMSO  
(at 373 K)  
**5c**

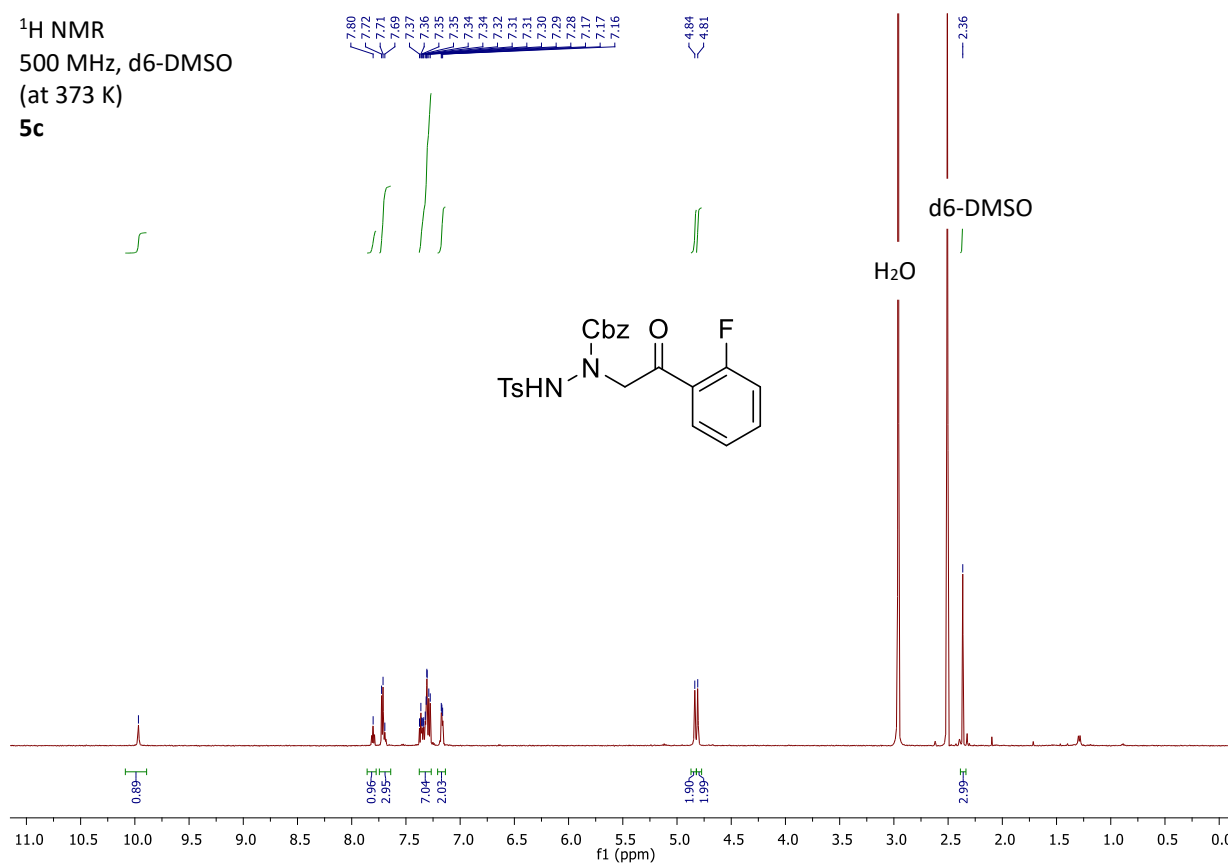

<sup>13</sup>C NMR  
125 MHz, d6-DMSO  
(at 373 K)  
**5c**

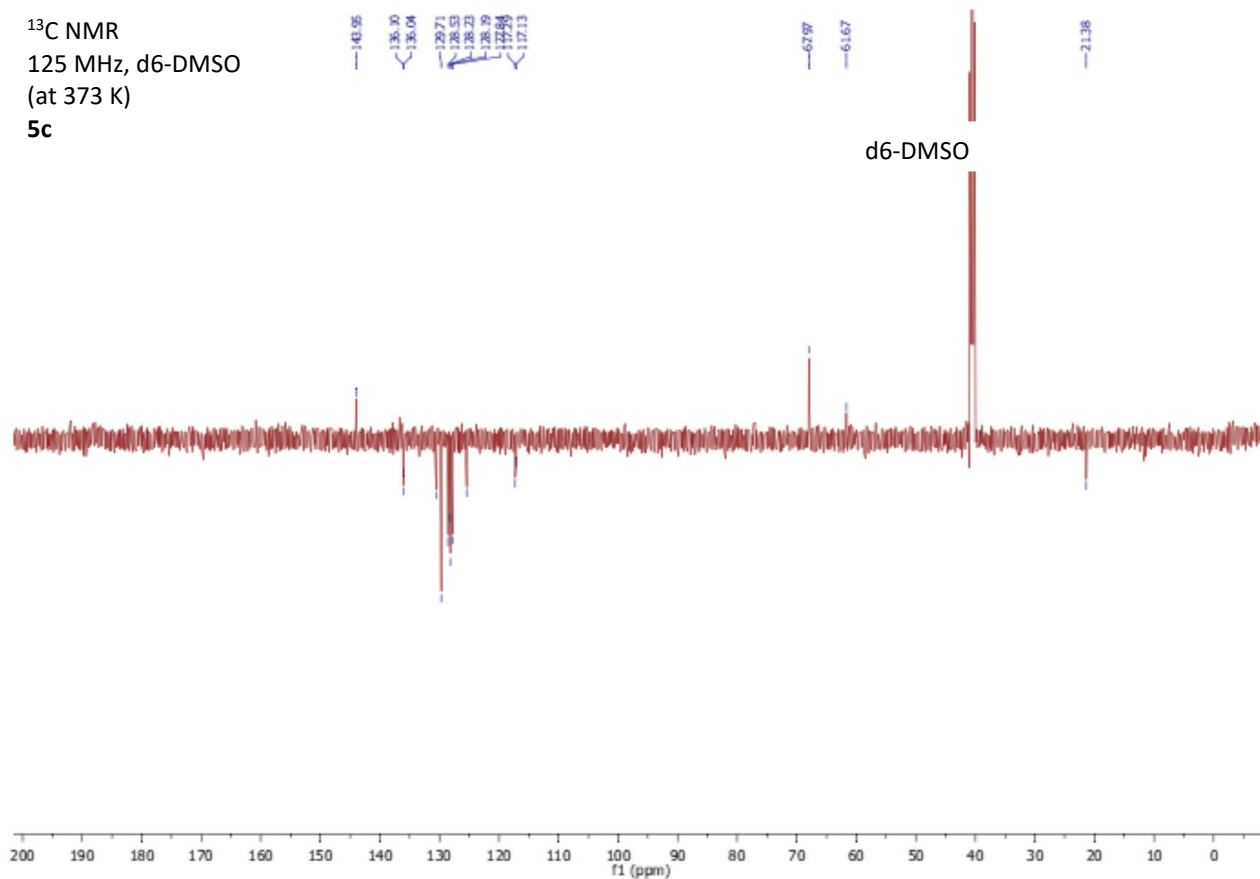

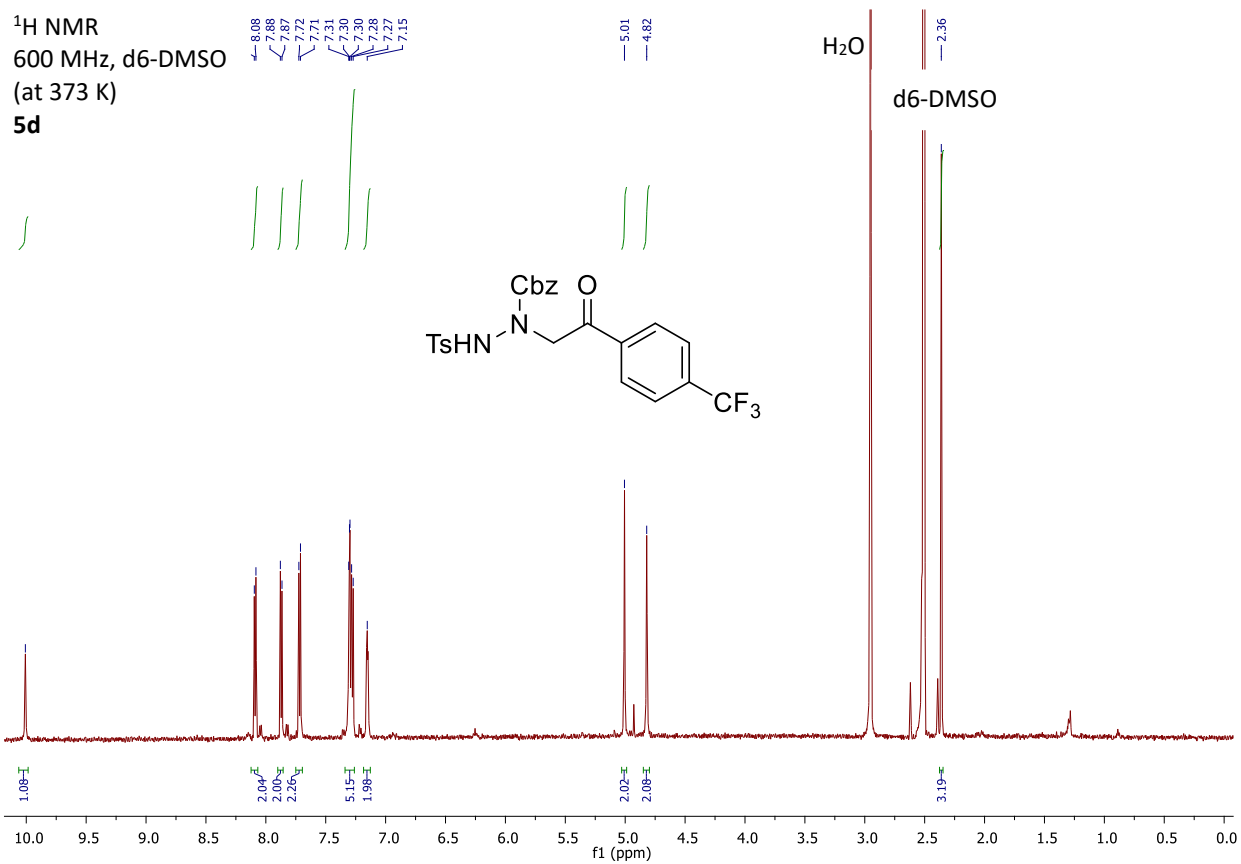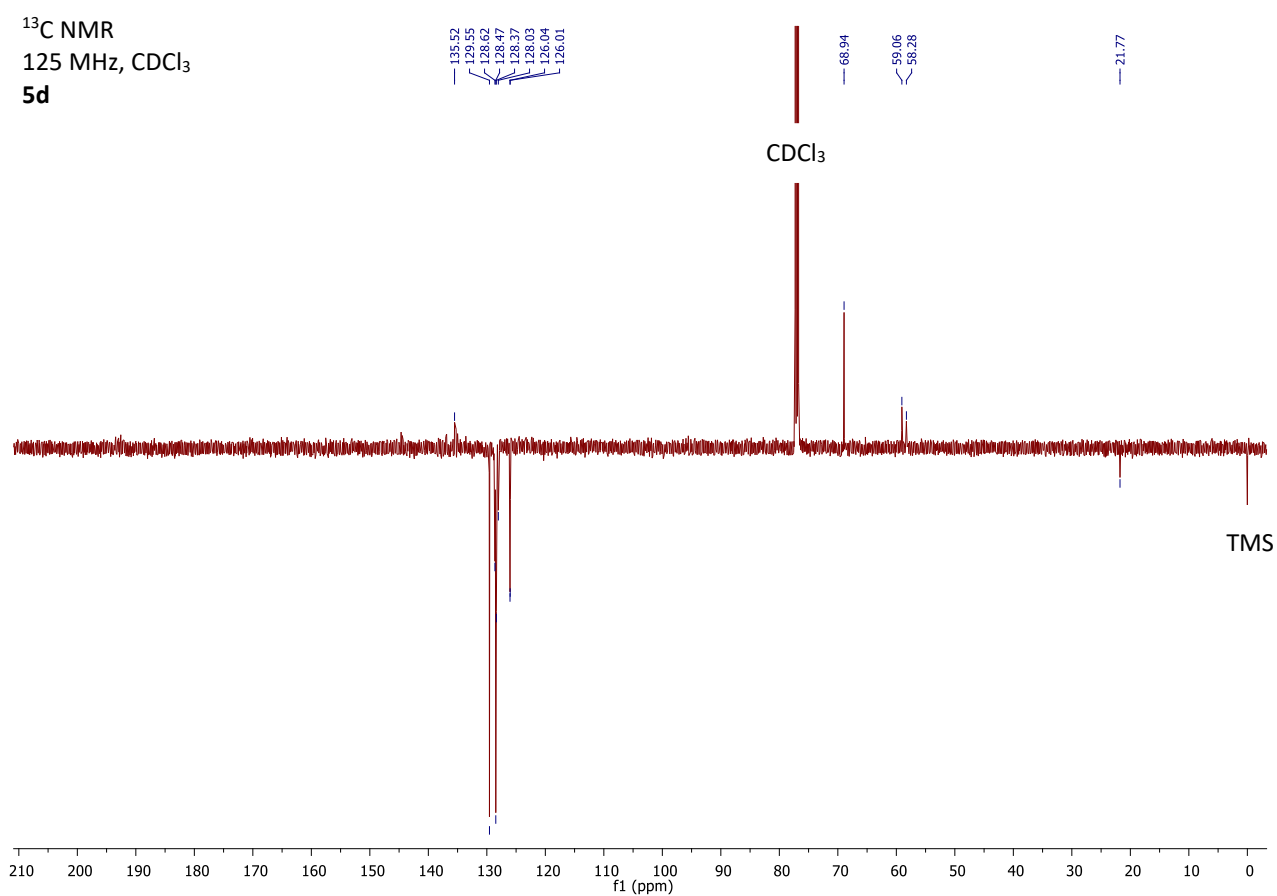

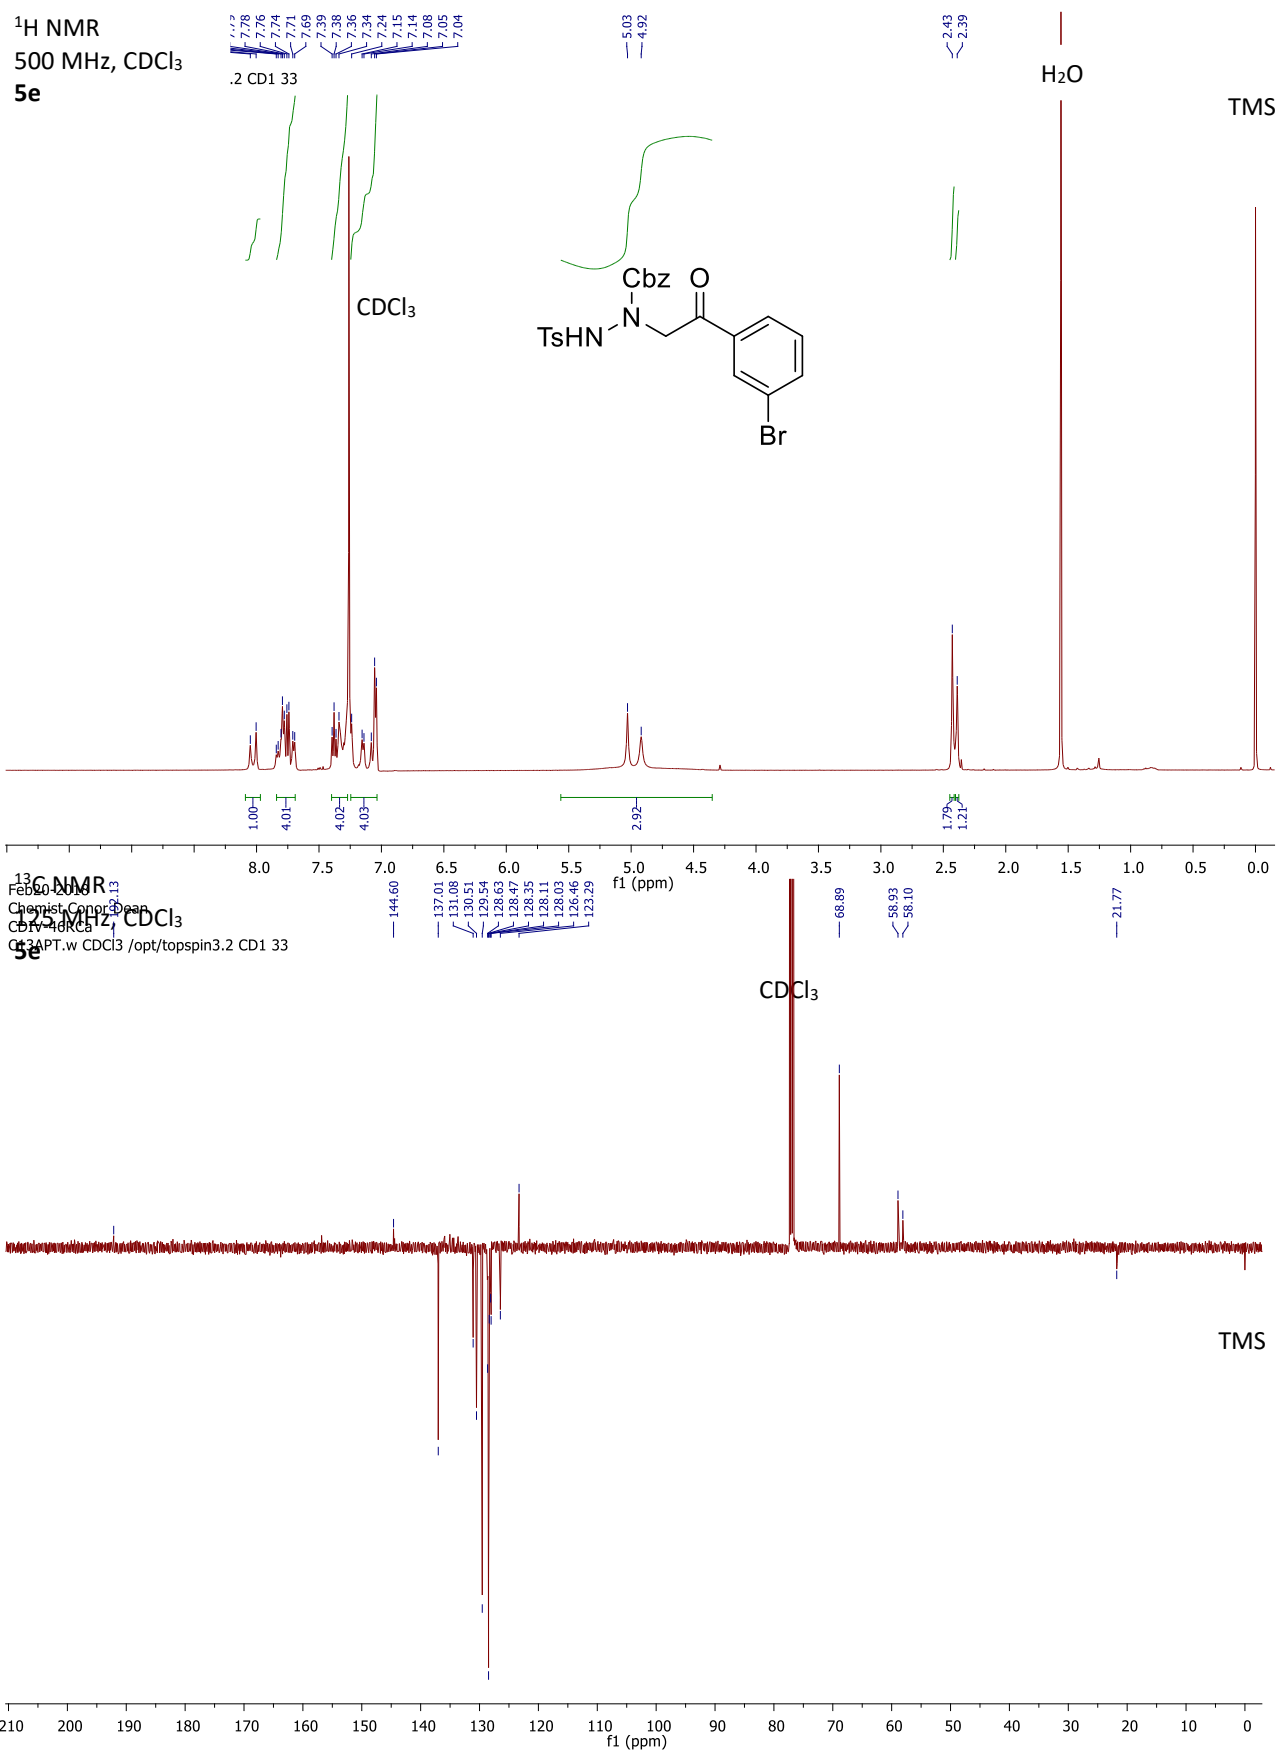

<sup>1</sup>H NMR  
500 MHz, CDCl<sub>3</sub>  
**5f**

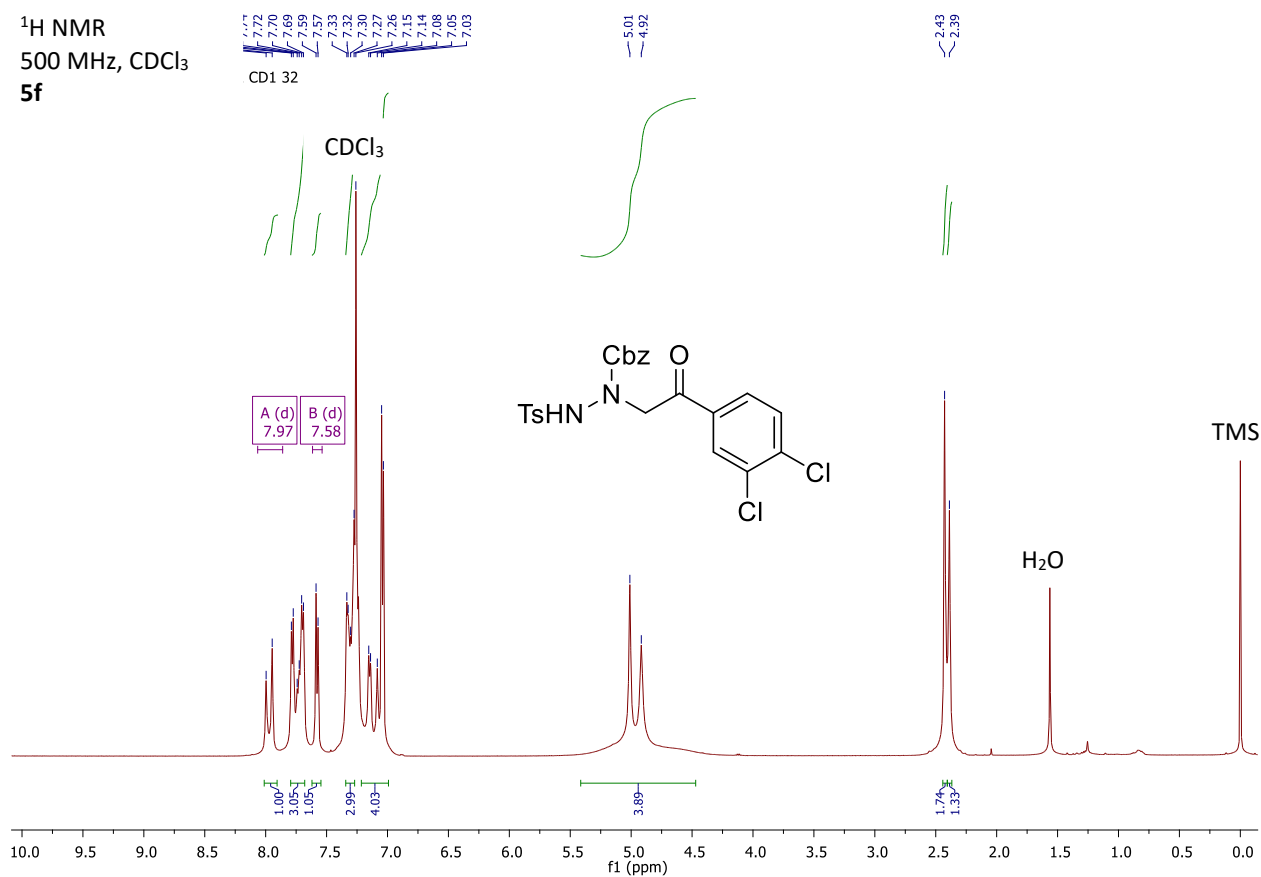

<sup>13</sup>C NMR  
125 MHz, CDCl<sub>3</sub>  
**5f**

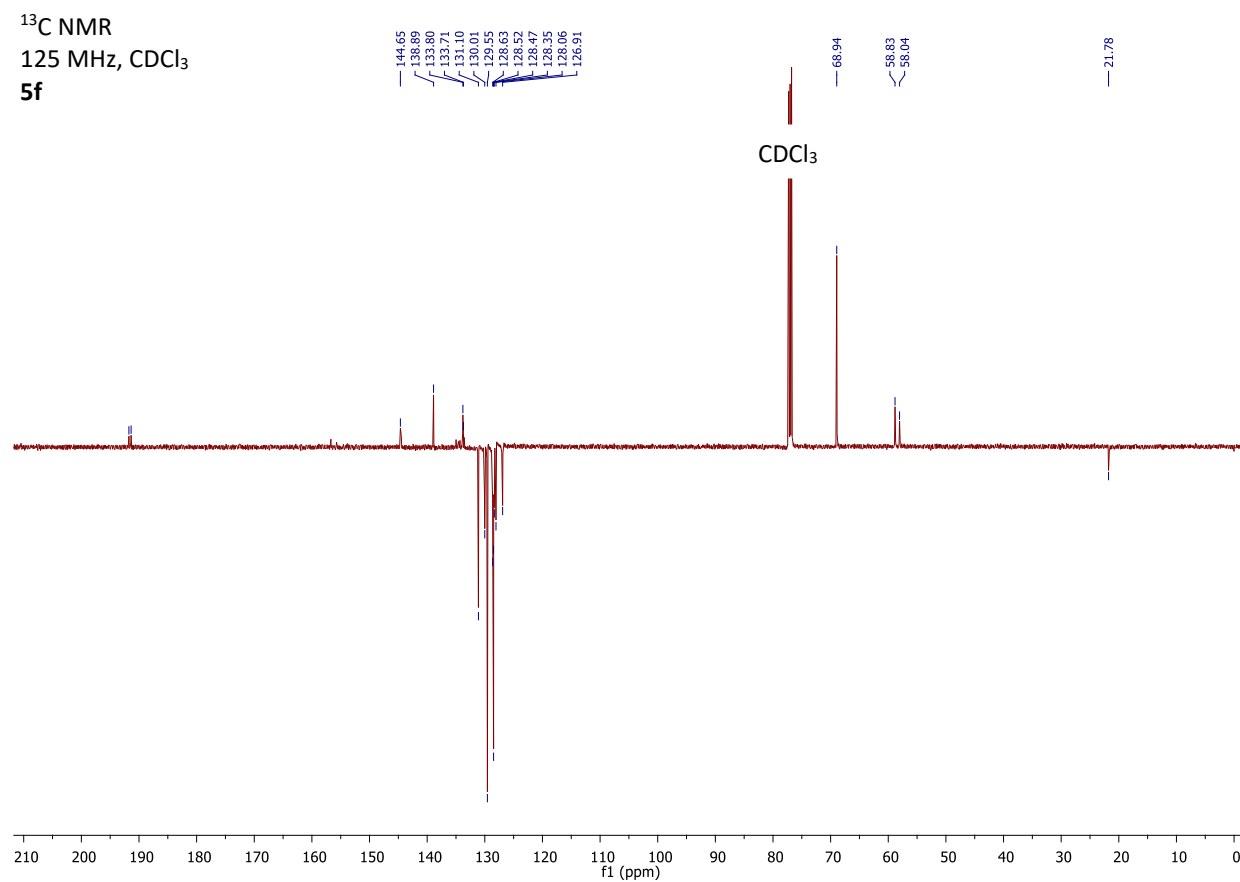

<sup>1</sup>H NMR  
500 MHz, d6-DMSO  
**5g**

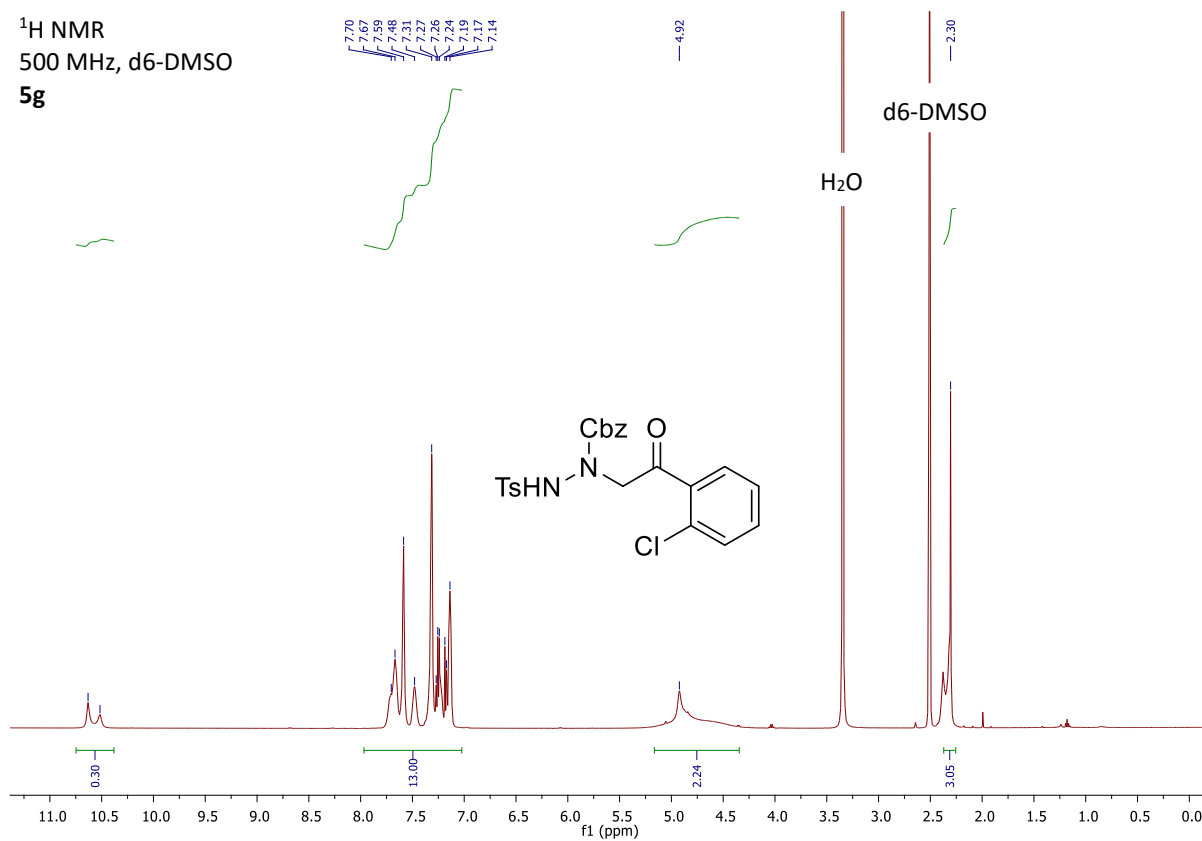

<sup>13</sup>C NMR  
125 MHz, d6-DMSO  
**5g**

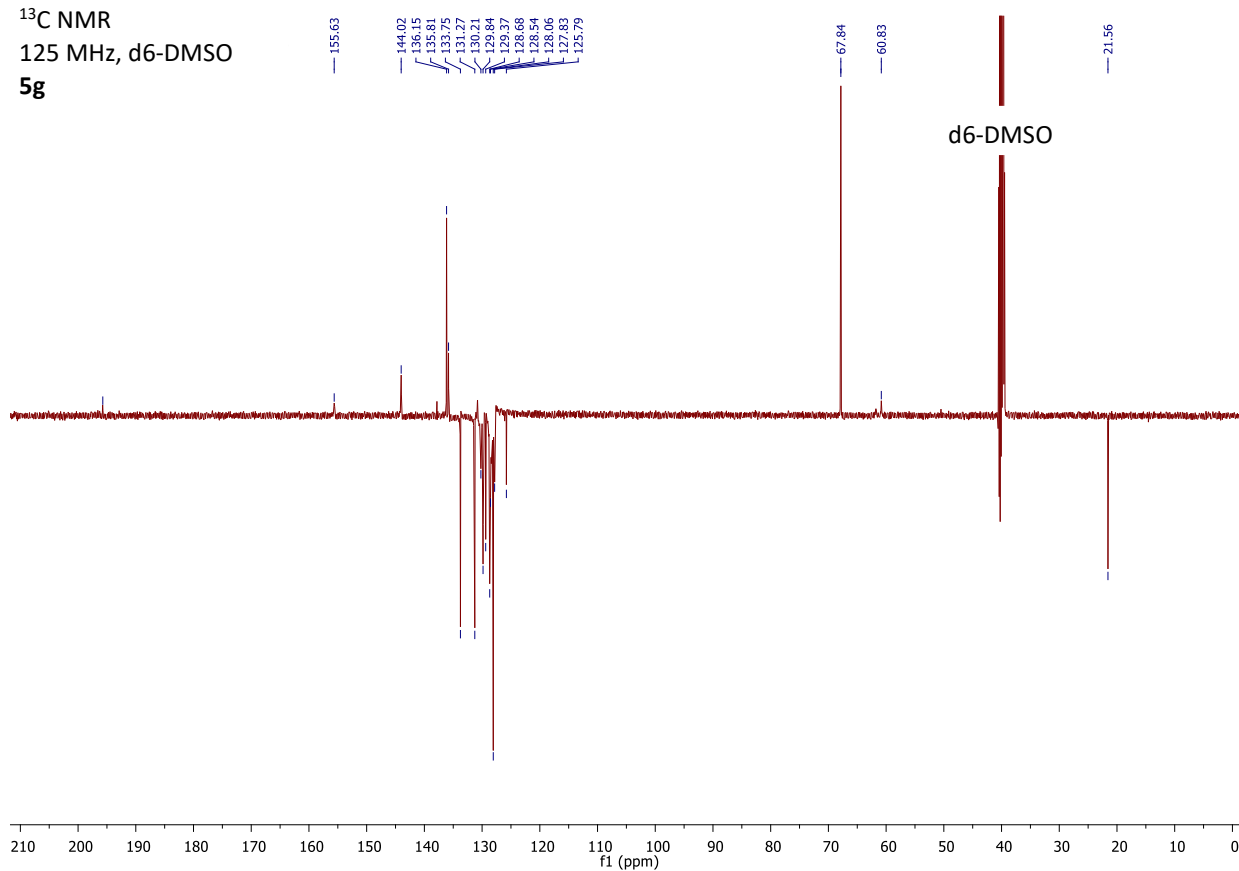



<sup>1</sup>H NMR  
500 MHz, CDCl<sub>3</sub>  
**5h**

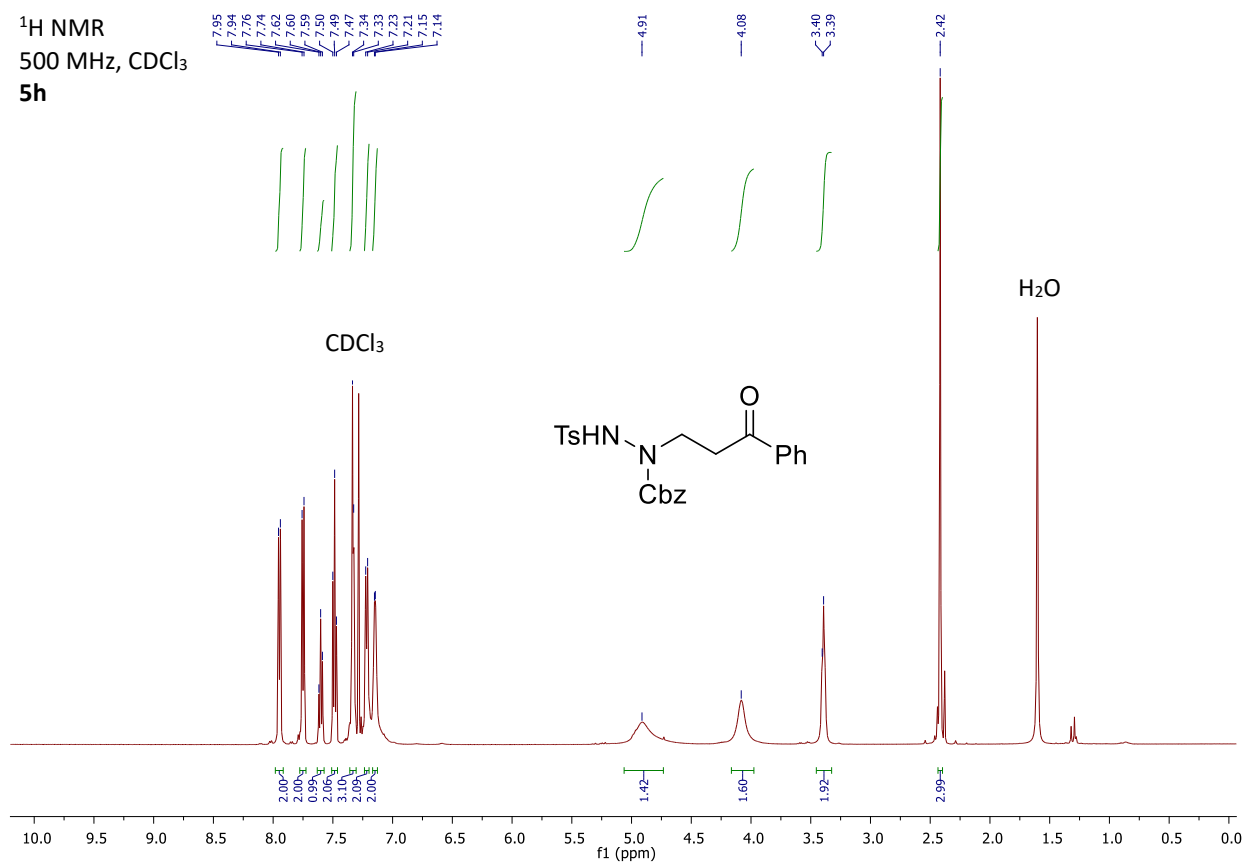

<sup>13</sup>C NMR  
125 MHz, CDCl<sub>3</sub>  
**5h**

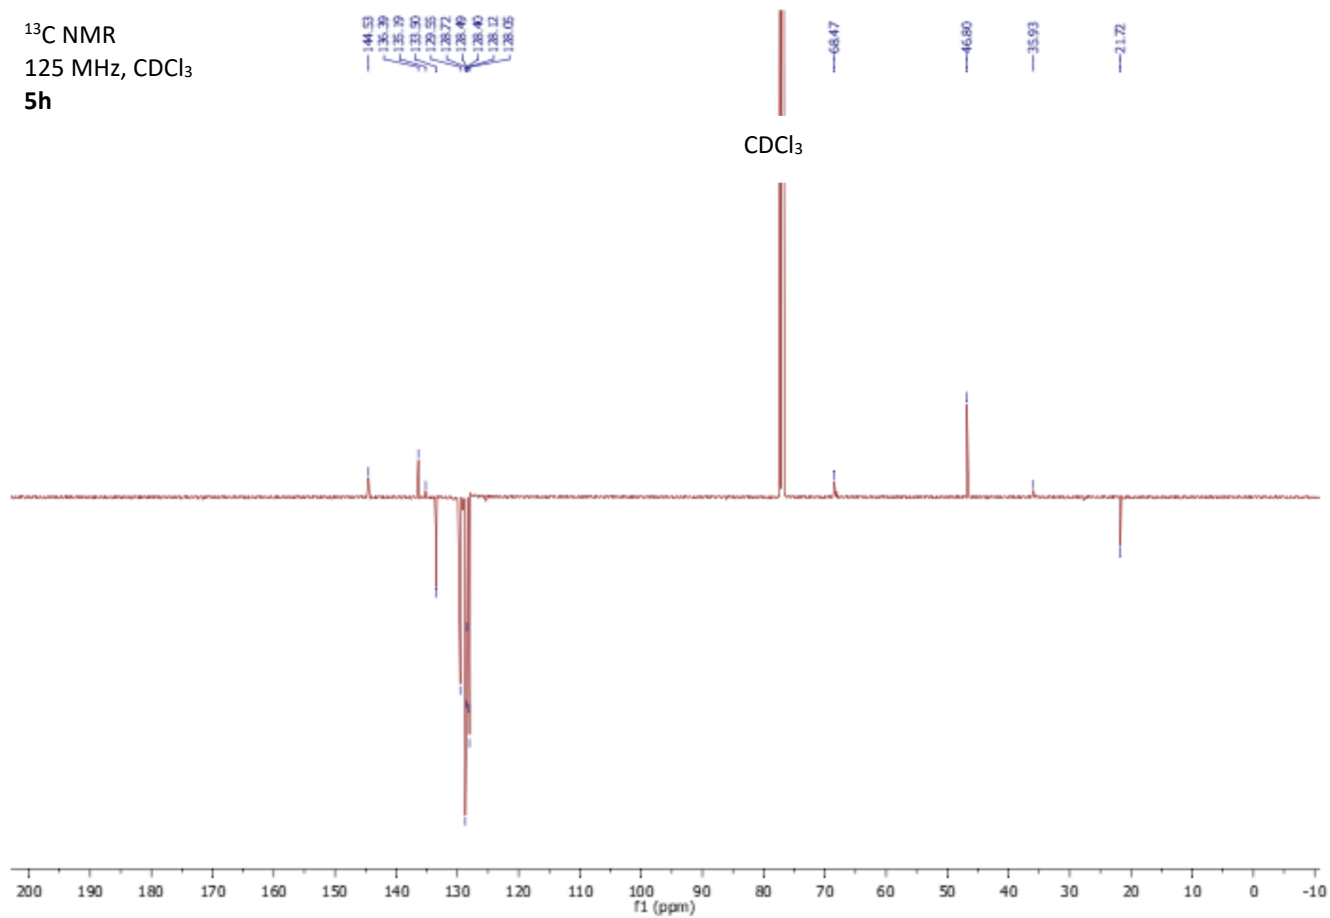

<sup>1</sup>H NMR  
500 MHz, CDCl<sub>3</sub>  
5i

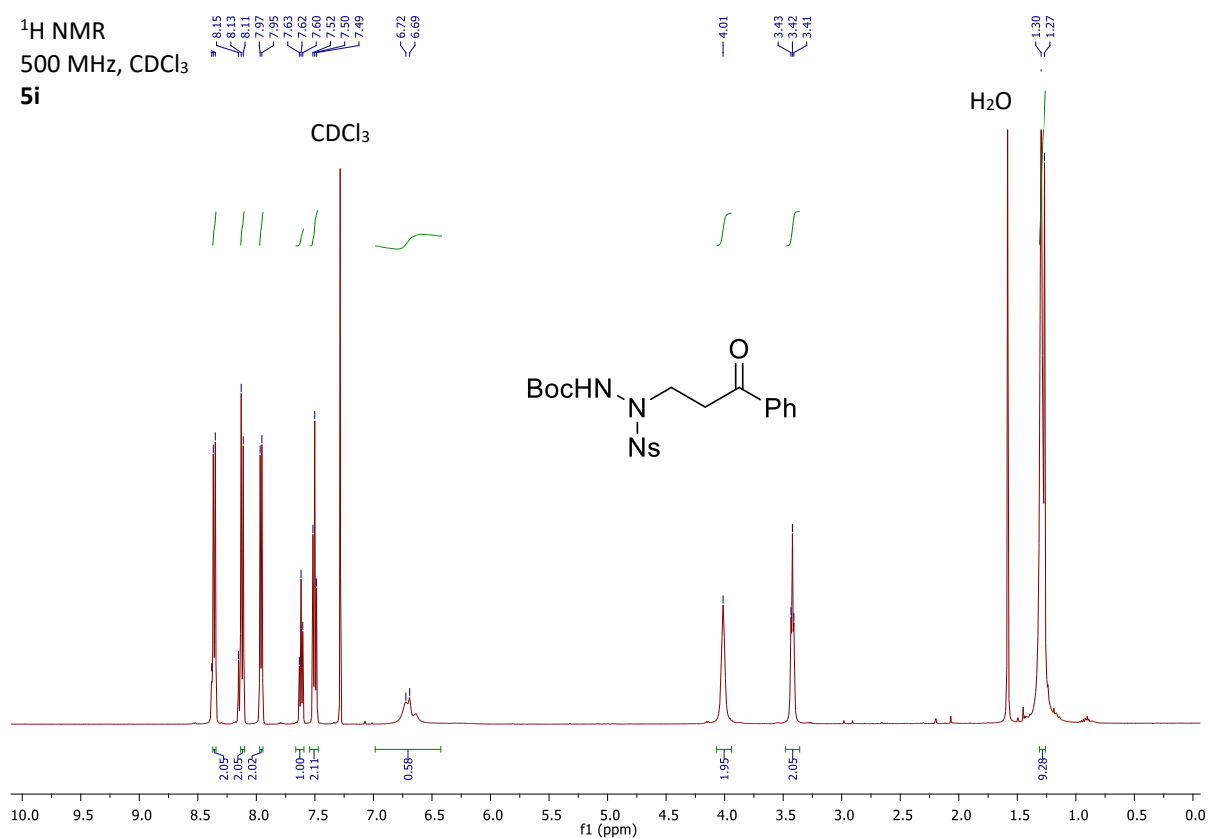

<sup>13</sup>C NMR  
125 MHz, CDCl<sub>3</sub>  
5i

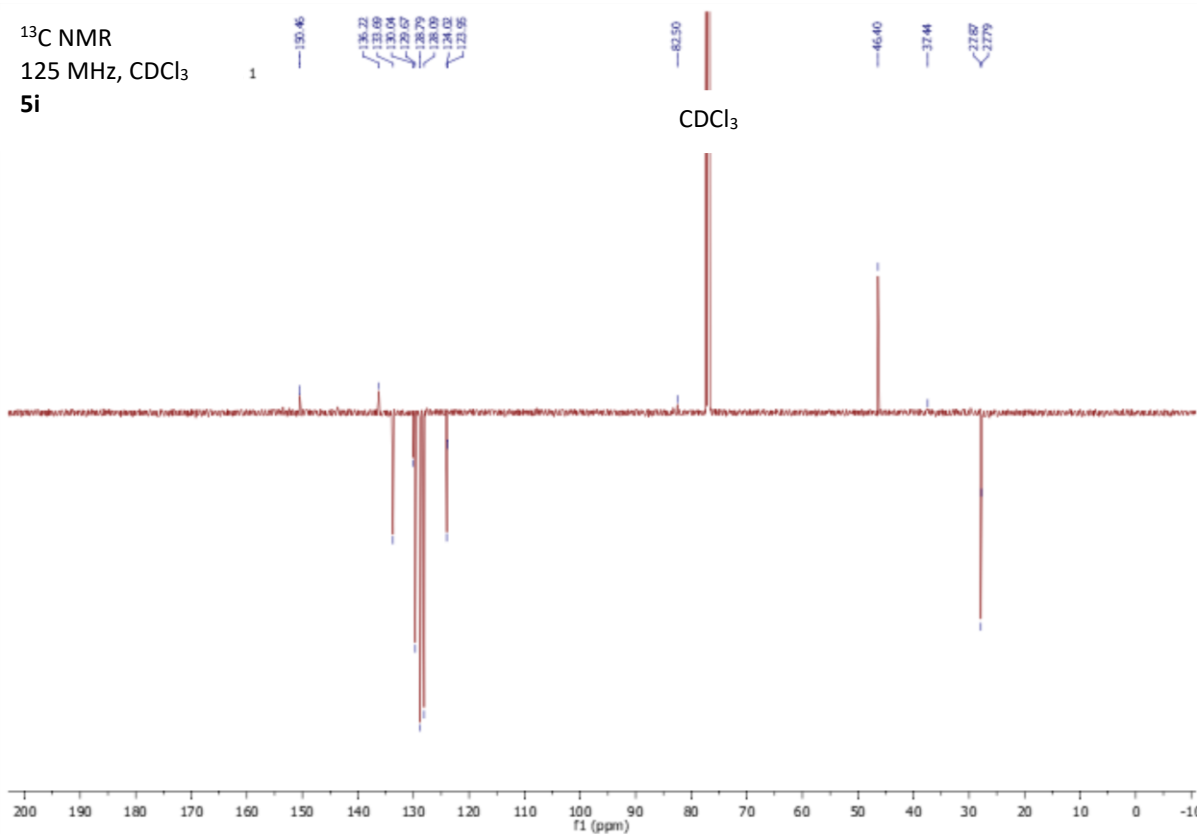

<sup>1</sup>H NMR  
400 MHz, CDCl<sub>3</sub>  
5j

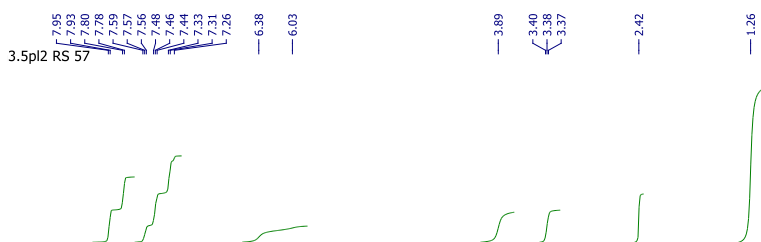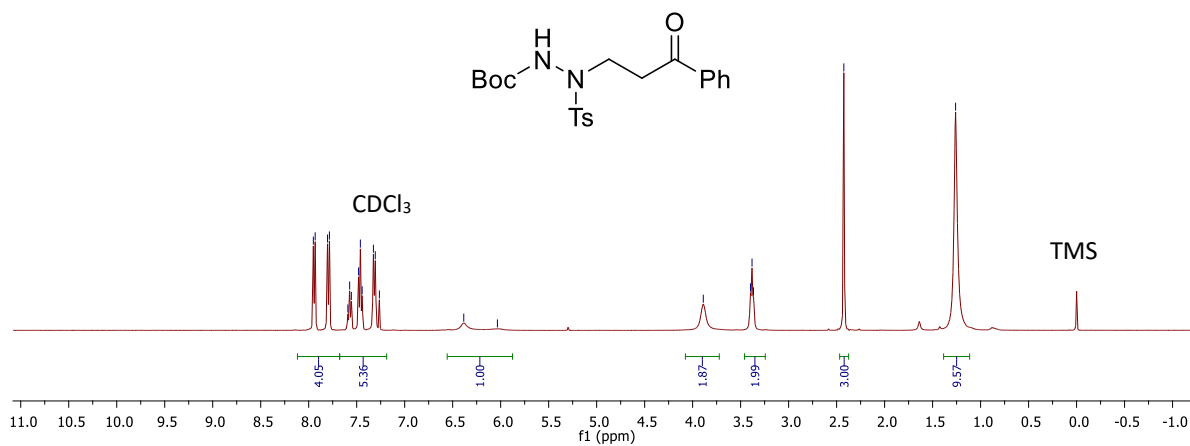

<sup>13</sup>C NMR  
100 MHz, CDCl<sub>3</sub>  
5j

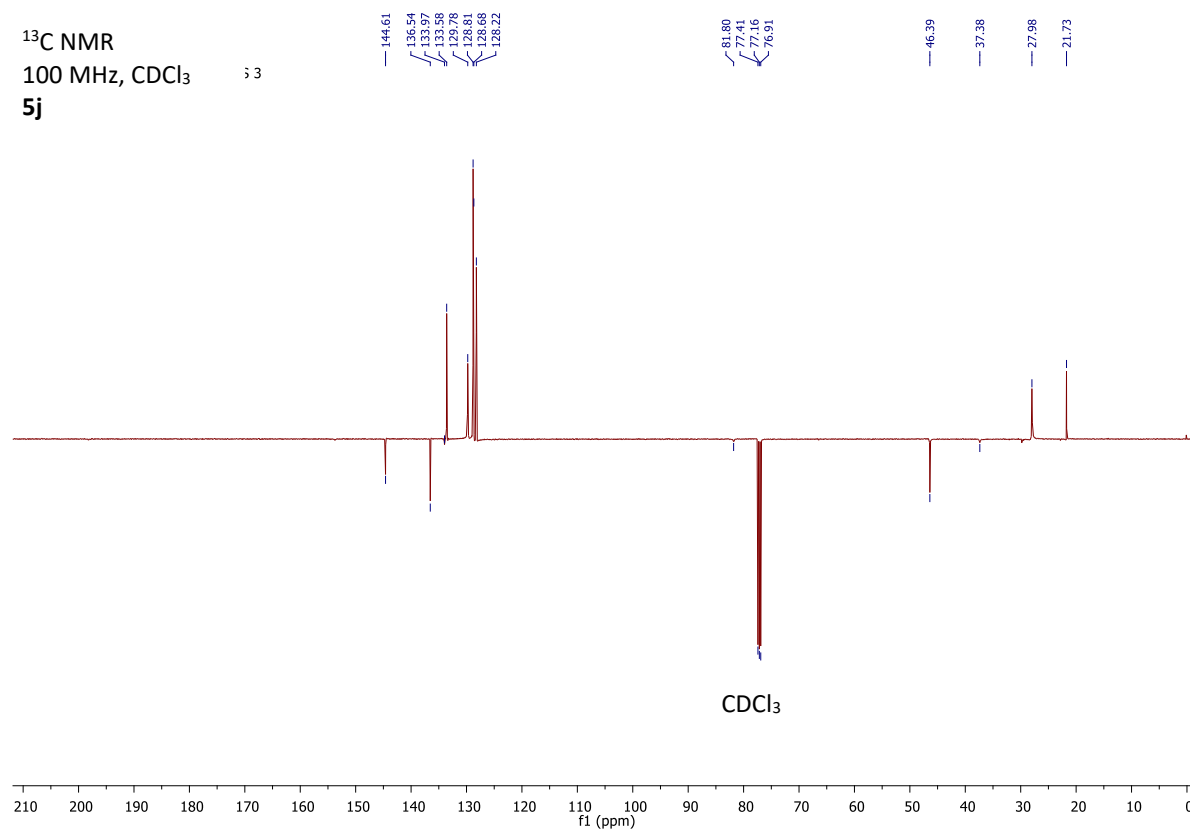

<sup>1</sup>H NMR  
500 MHz, CDCl<sub>3</sub>  
**5k**

Chemical structure of **5k** is shown above the spectrum:

CC(C)(C)OC(=O)NCC(=O)c1ccc(cc1)c2ccccc2

The spectrum displays the following peaks and integrations:

- Aromatic region (7.2-7.7 ppm): Multiple peaks with integrations of 2.00, 1.96, 2.04, 2.09, 2.30, 0.99, and 1.95.
- CDCl<sub>3</sub> solvent peak at 7.26 ppm.
- BocHN-CH<sub>2</sub>-CH<sub>2</sub>-C(=O)-Ph group signals (3.5-4.0 ppm): Two multiplets with integrations of 1.29 and 1.84.
- Water (H<sub>2</sub>O) peak at 3.3 ppm with integration of 2.88.
- Aliphatic signals (1.0-1.5 ppm): Two multiplets with integrations of 9.07 and 2.88.

<sup>13</sup>C NMR  
125 MHz, CDCl<sub>3</sub>  
**5k**

CDCl<sub>3</sub>

Chemical shift values (ppm): 146.38, 144.52, 139.77, 135.12, 132.68, 128.99, 128.72, 128.57, 128.34, 127.33, 127.29, 77.0, 46.38, 41.36, 27.88, 21.63.

<sup>1</sup>H NMR  
500 MHz, CDCl<sub>3</sub>  
5I

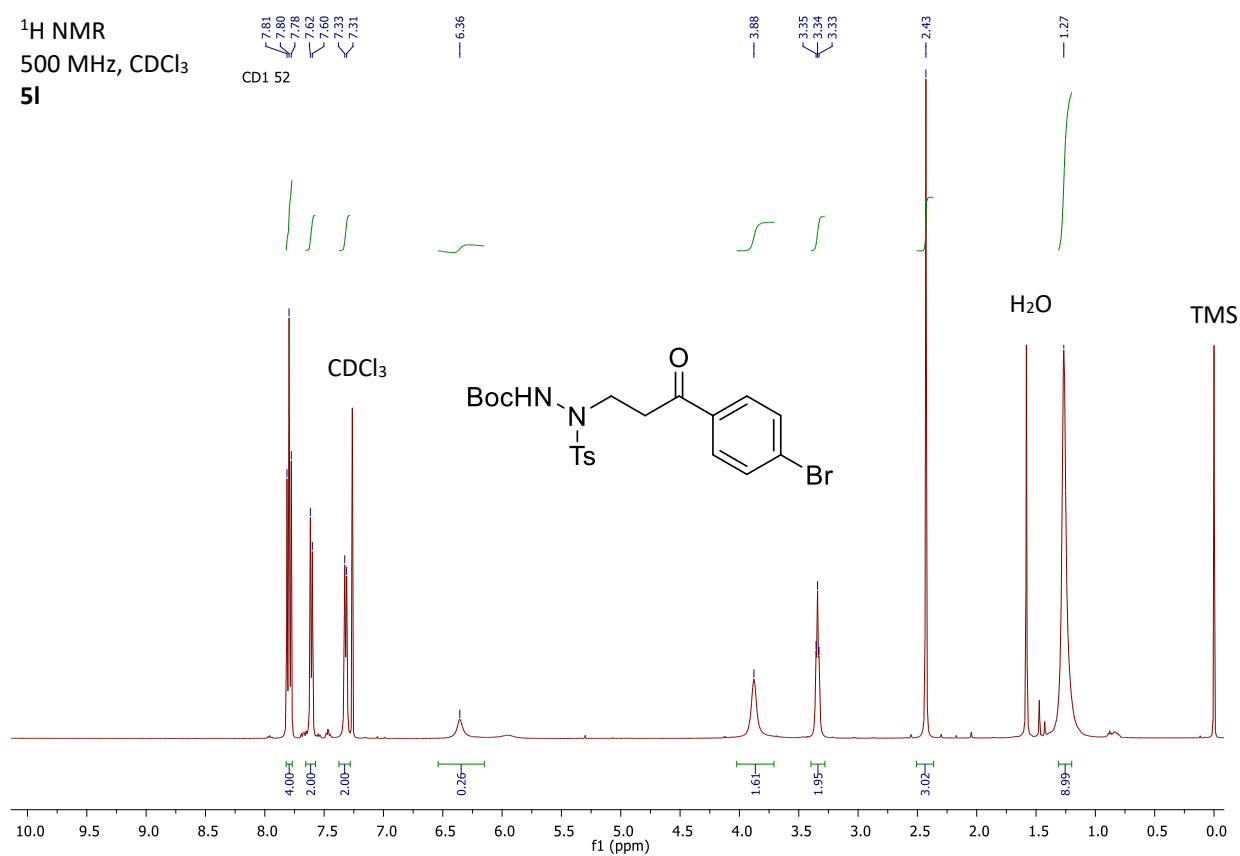

<sup>13</sup>C NMR  
125 MHz, CDCl<sub>3</sub>  
5I

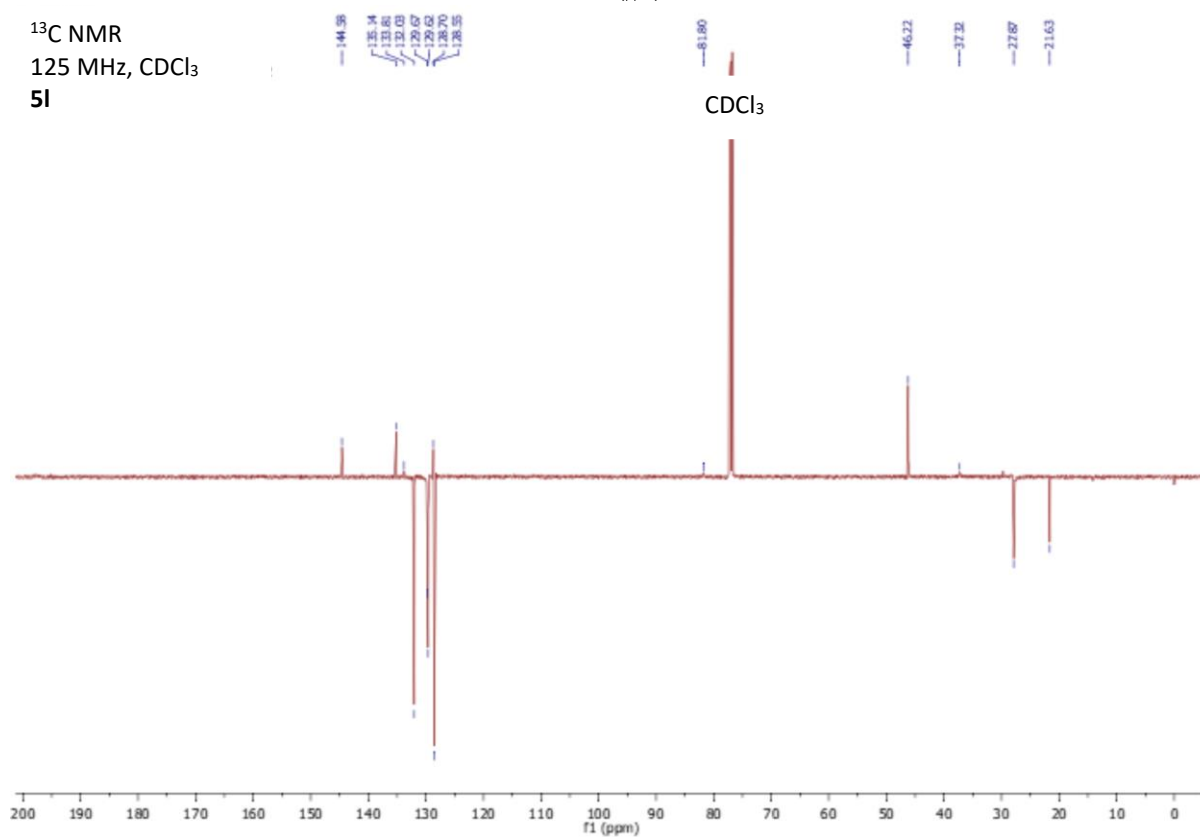

<sup>1</sup>H NMR  
500 MHz, CDCl<sub>3</sub>  
5m

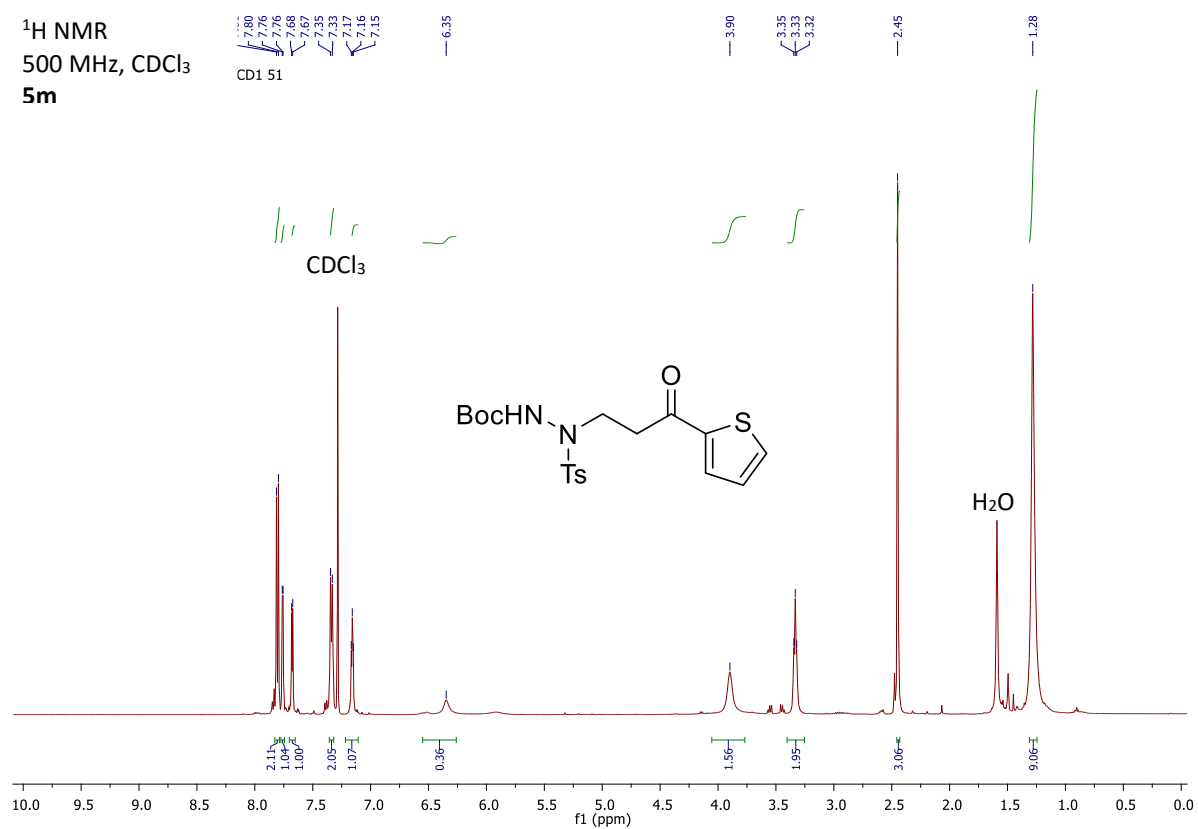

<sup>13</sup>C NMR  
125 MHz, CDCl<sub>3</sub>  
5m

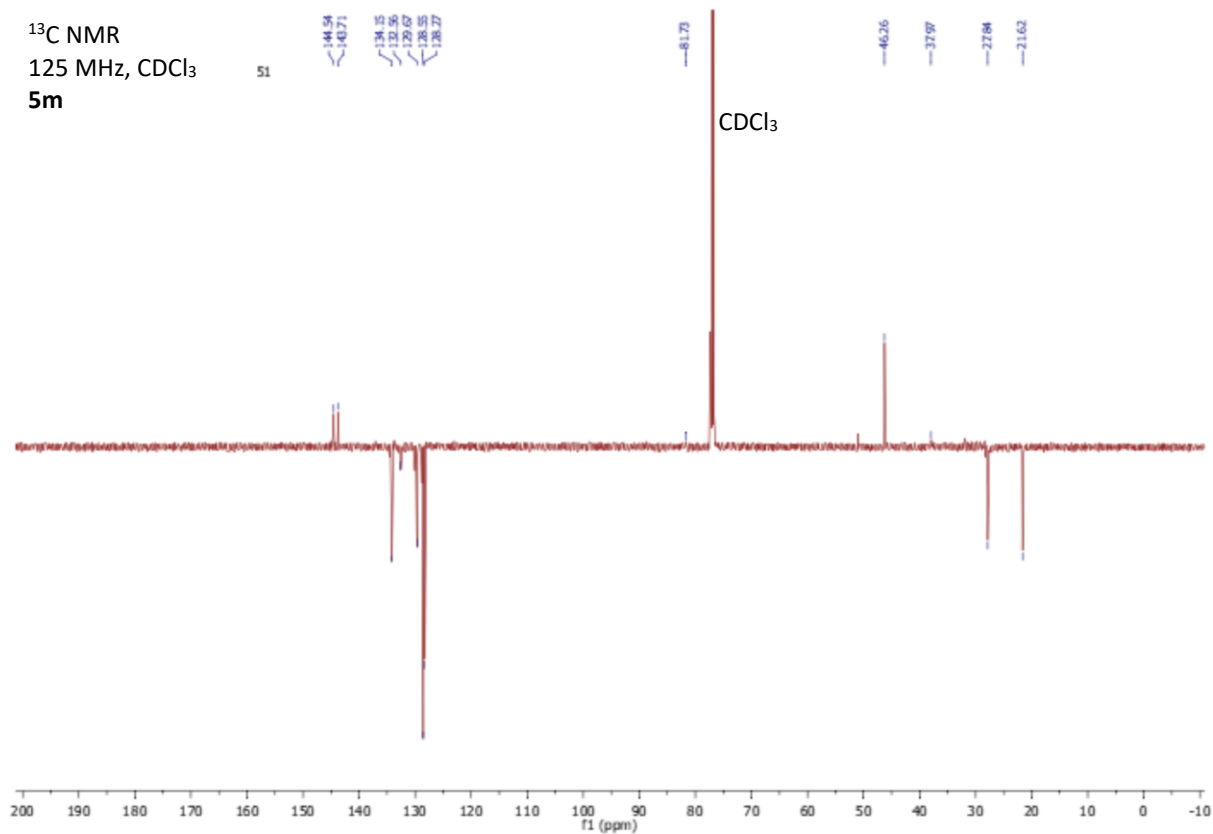

<sup>1</sup>H NMR  
400 MHz, CDCl<sub>3</sub>  
5n

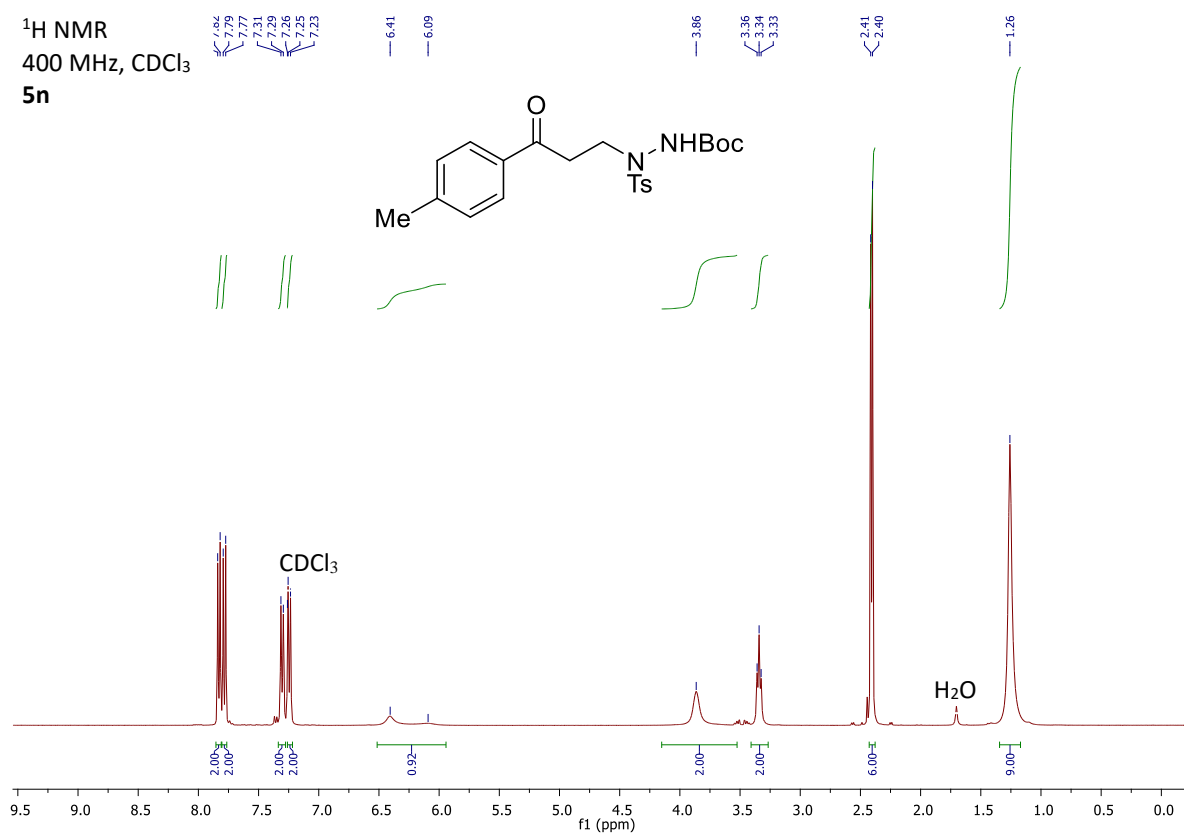

<sup>13</sup>C NMR  
100 MHz, CDCl<sub>3</sub>  
5n

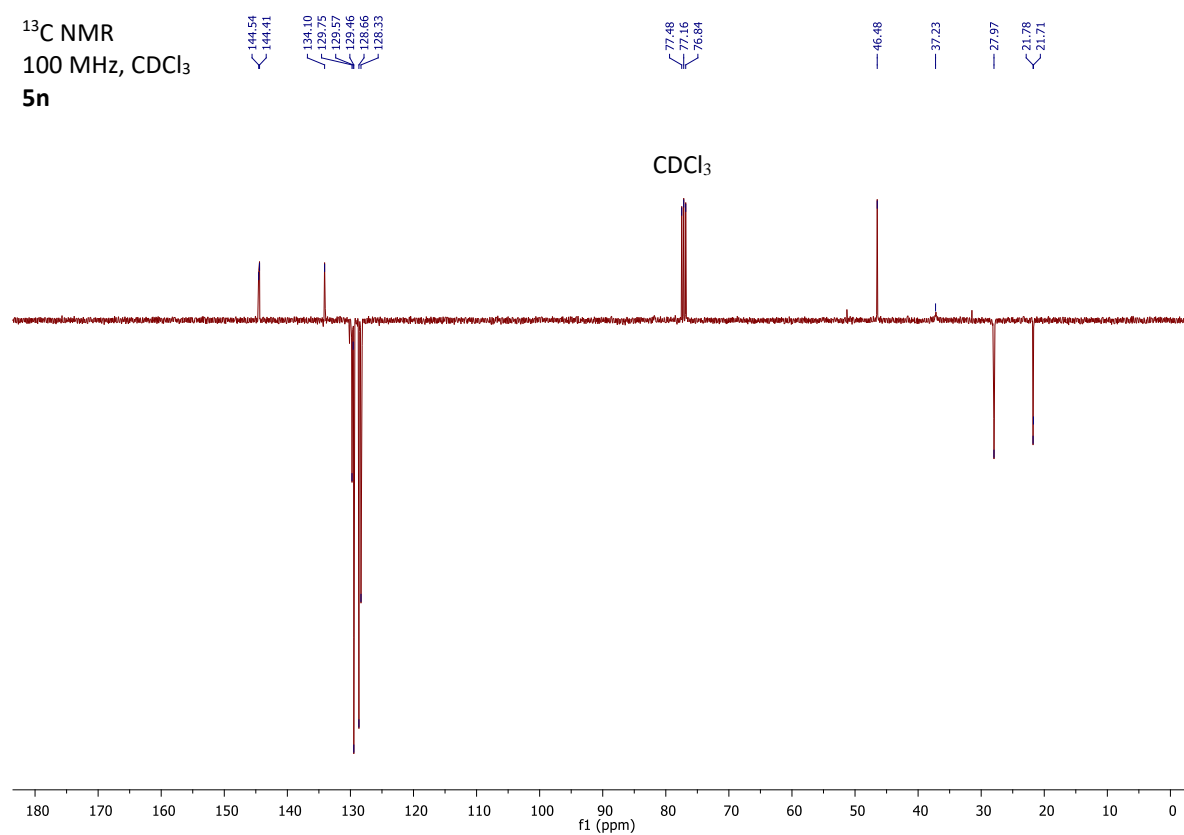

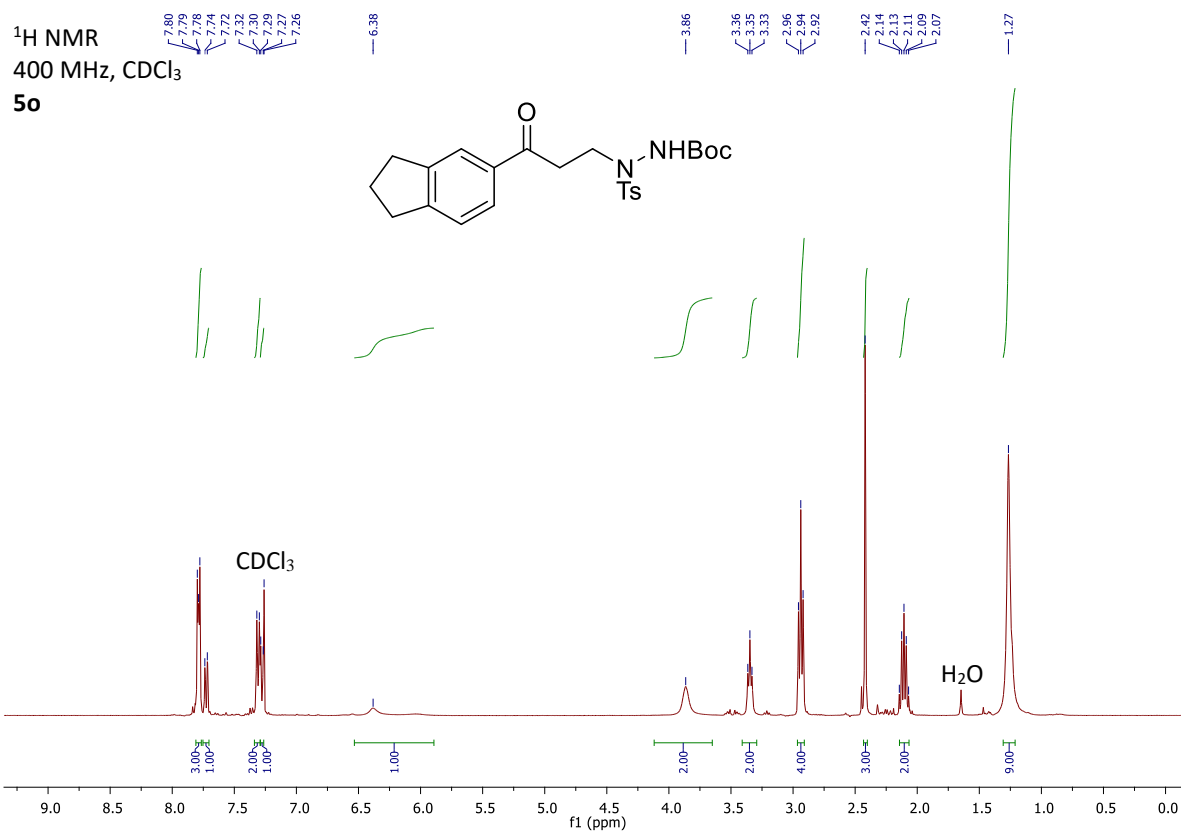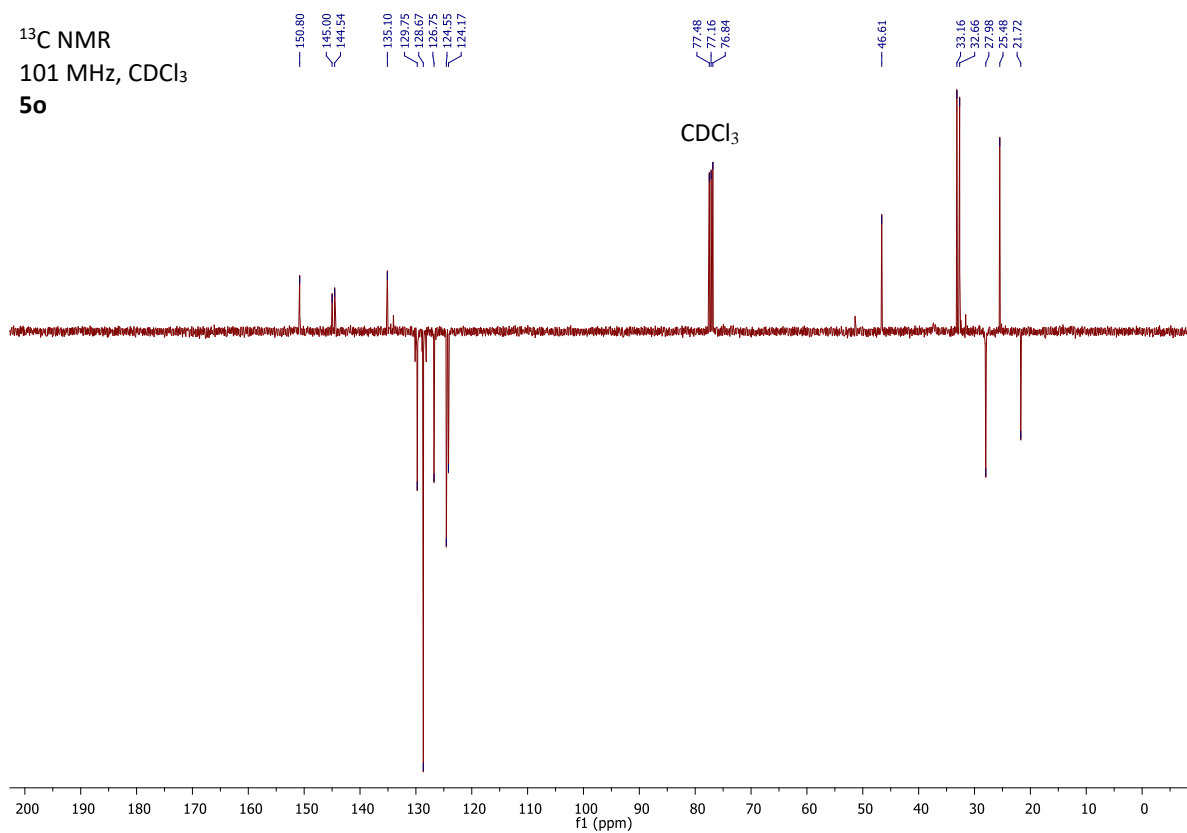



<sup>1</sup>H NMR  
500 MHz, CDCl<sub>3</sub>  
5p

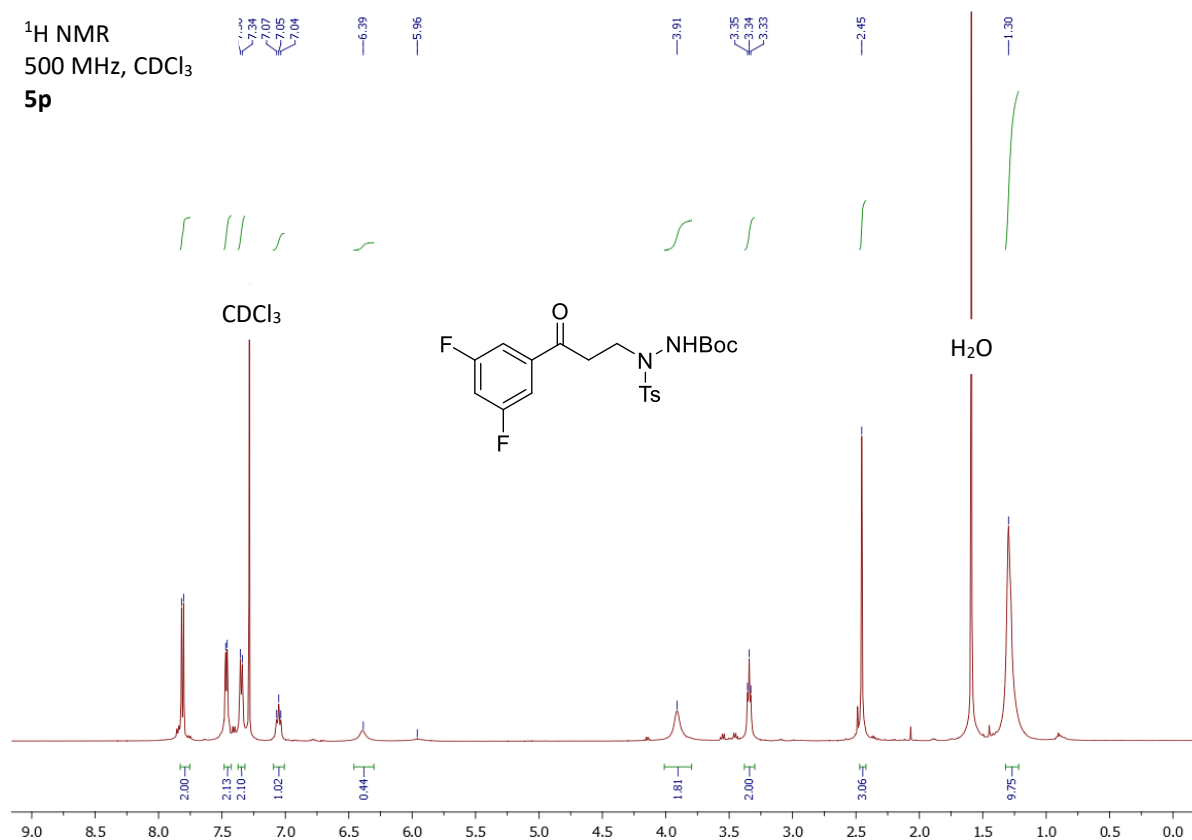

<sup>13</sup>C NMR  
125 MHz, CDCl<sub>3</sub>  
5p

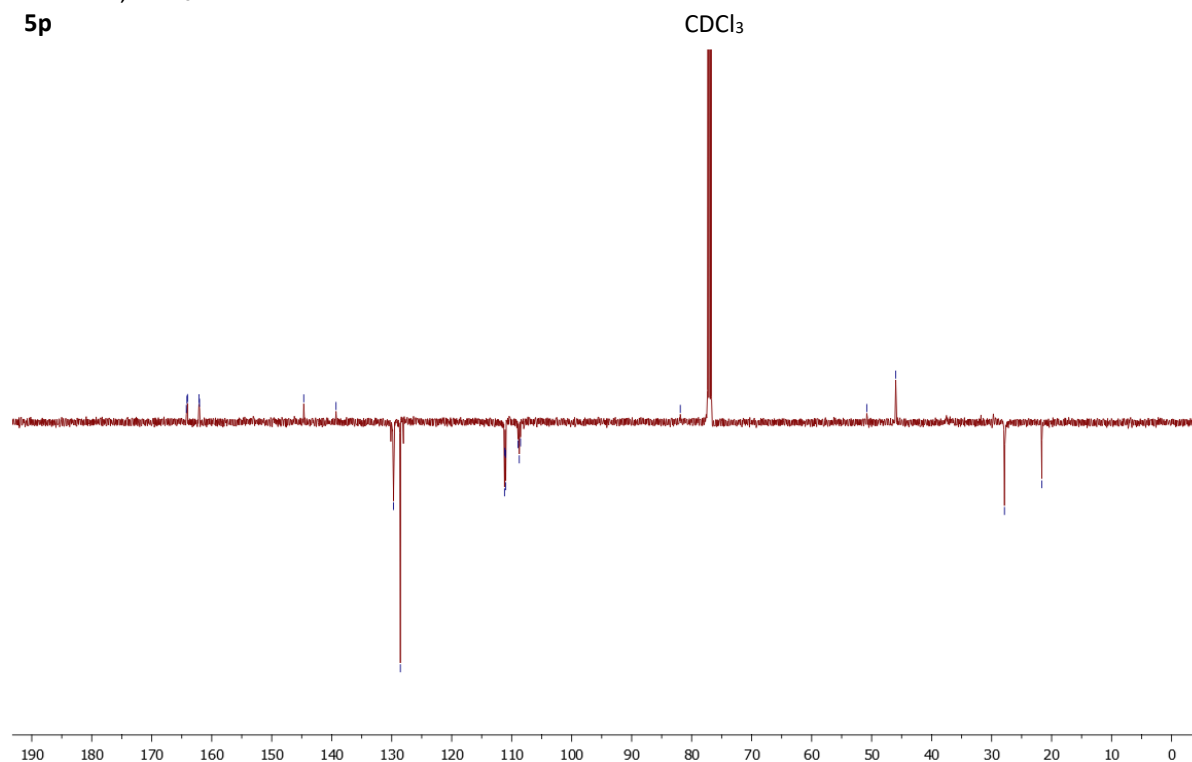

<sup>1</sup>H NMR  
400 MHz, CDCl<sub>3</sub>  
**12**

7.68  
7.65  
7.27  
7.26  
7.25

3.99  
3.97  
3.95  
3.90  
3.87  
3.39  
3.37  
3.35  
3.03  
3.01  
2.99

2.38

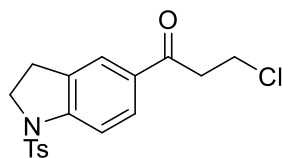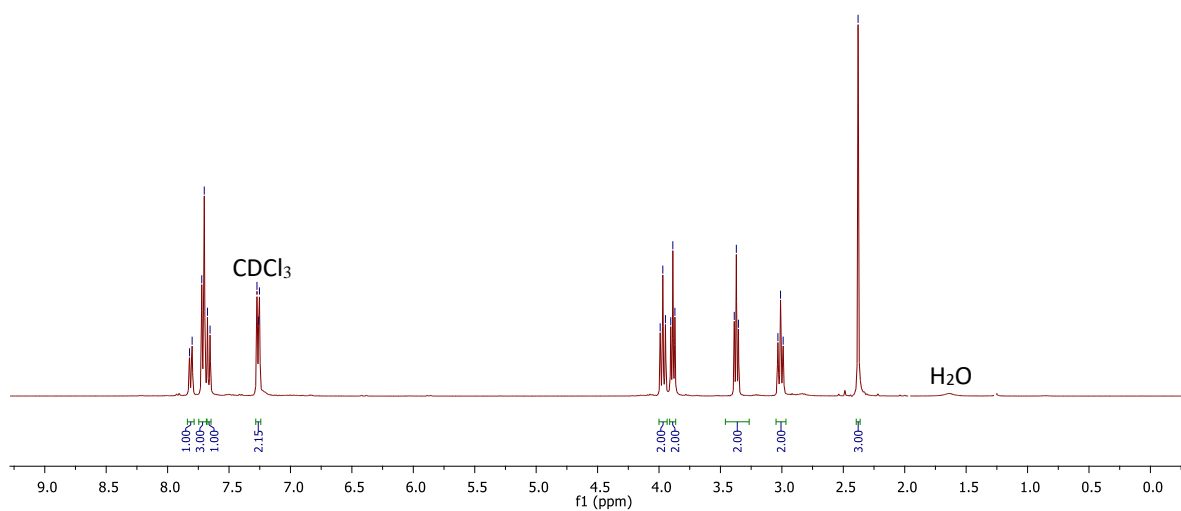

<sup>13</sup>C NMR  
101 MHz, CDCl<sub>3</sub>  
**12**

146.77  
144.79  
133.88  
132.16  
132.05  
130.03  
129.31  
127.32  
125.28  
113.57

77.48  
77.16  
76.84

50.32  
41.12  
38.96  
27.36  
21.69

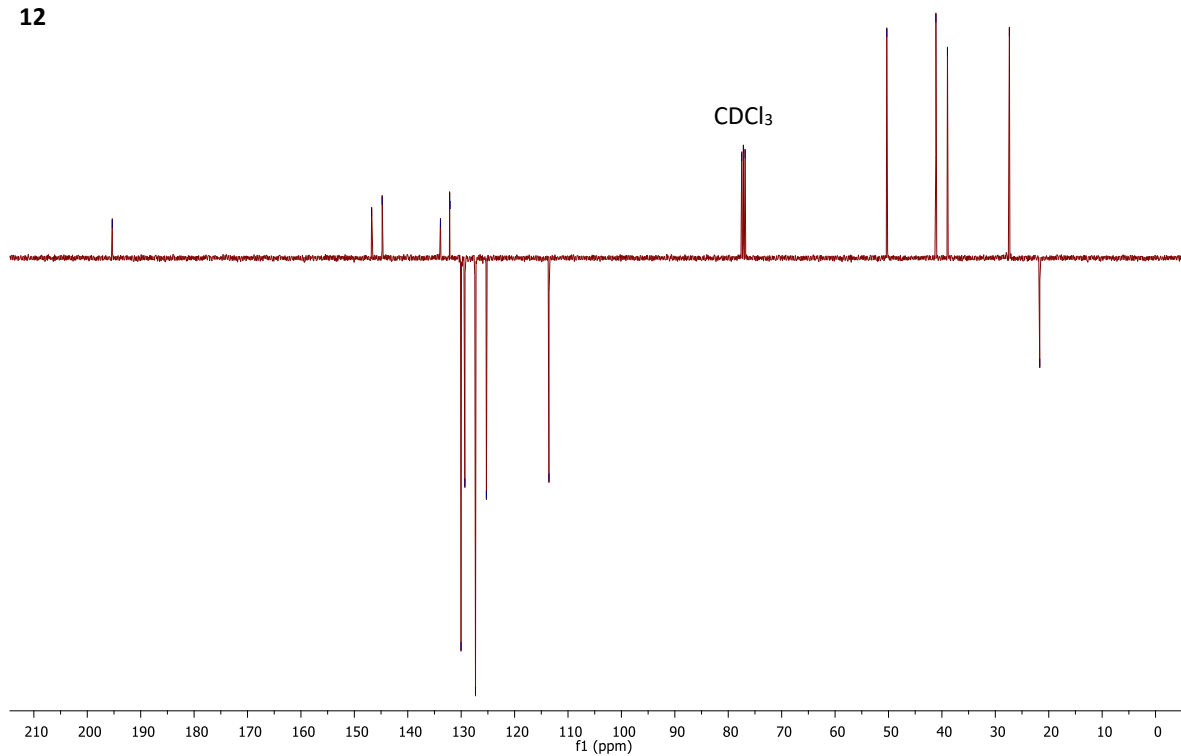

<sup>1</sup>H NMR  
400 MHz, CDCl<sub>3</sub>  
5q

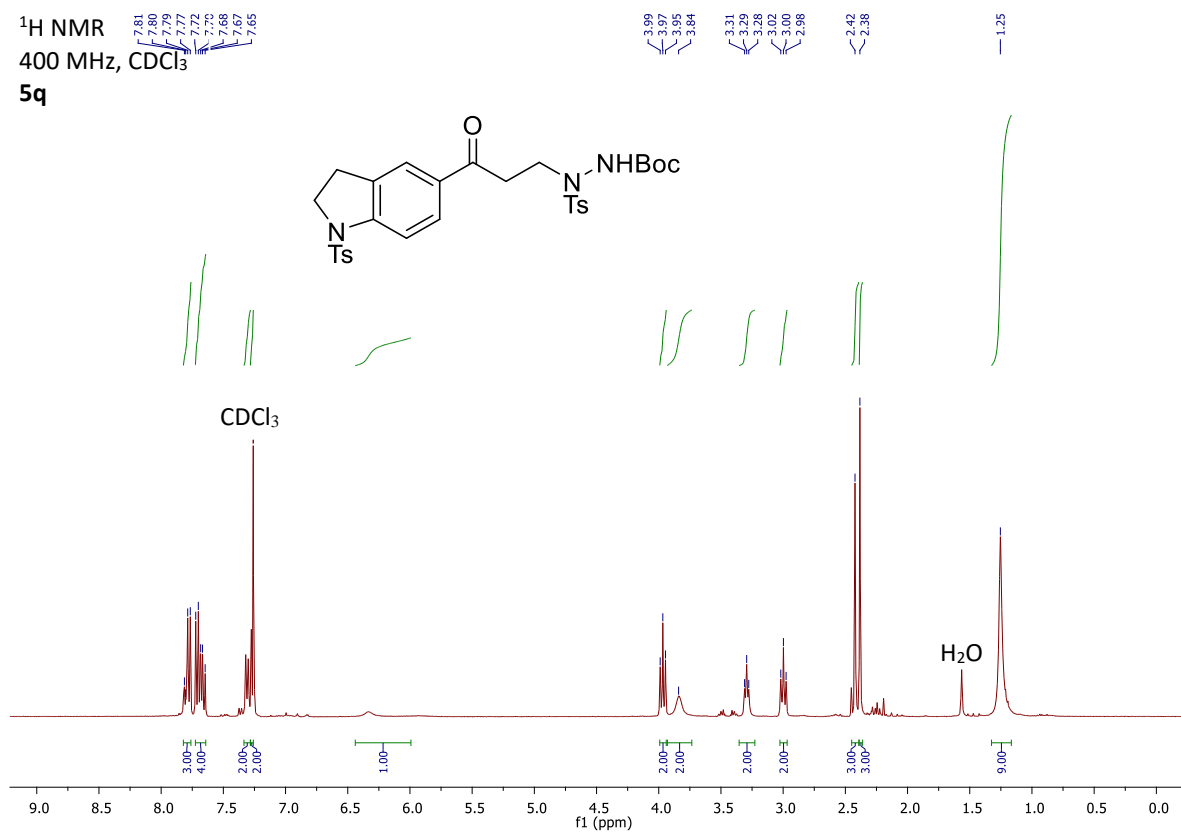

<sup>13</sup>C NMR  
101 MHz, CDCl<sub>3</sub>  
5q

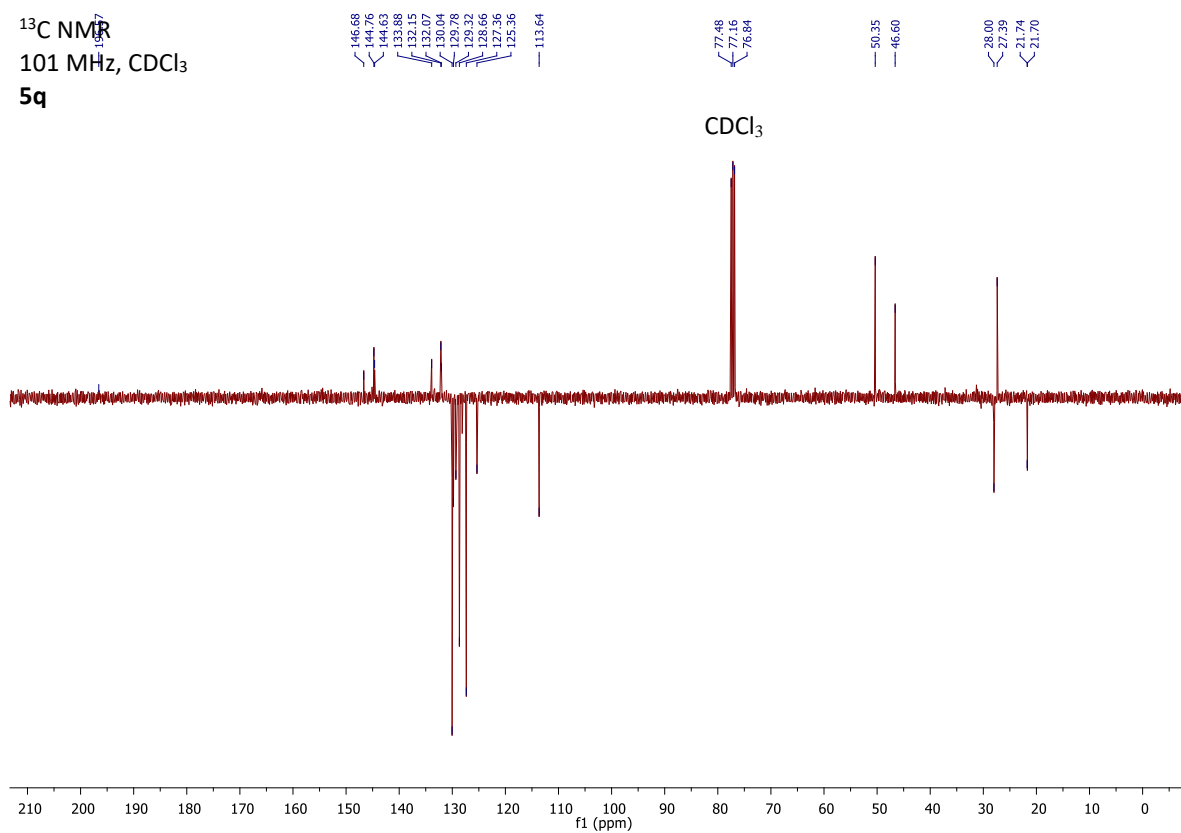

<sup>1</sup>H NMR  
500 MHz, CDCl<sub>3</sub>  
**5r**

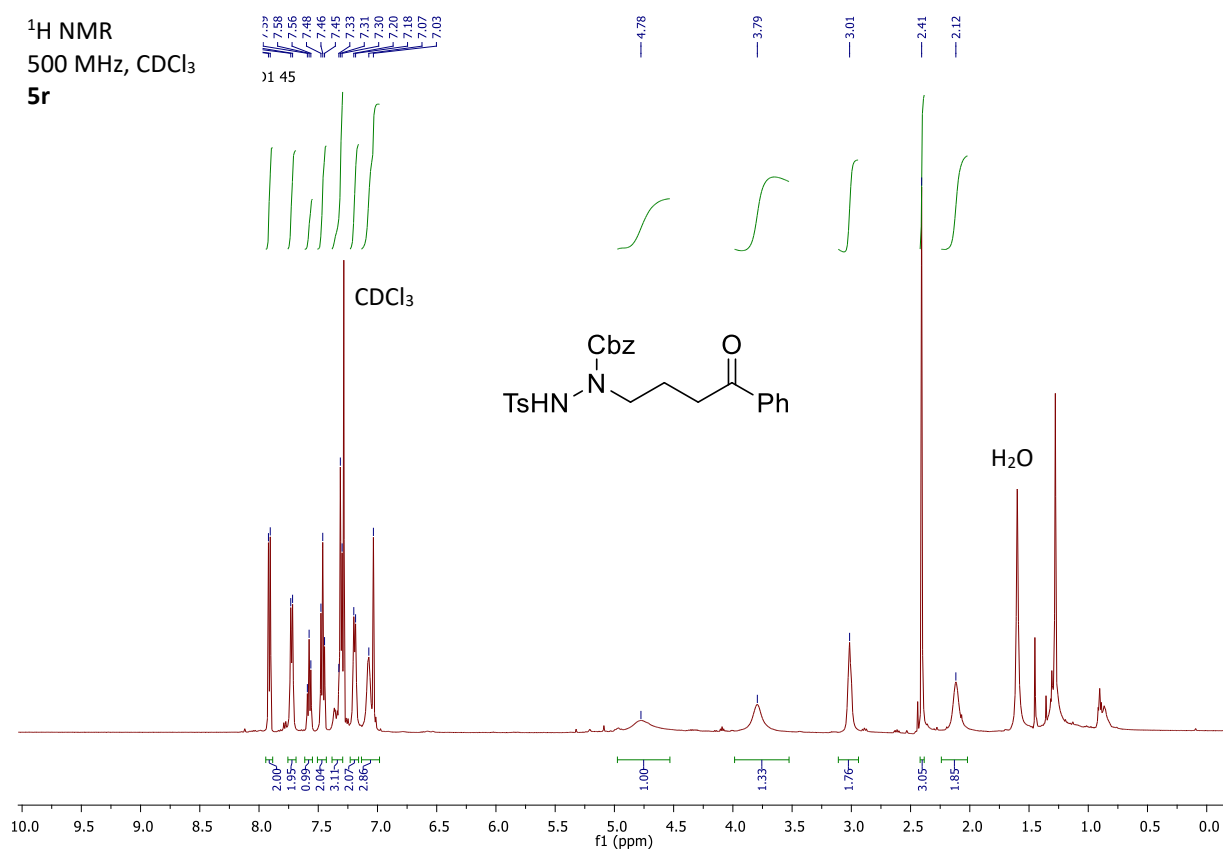

<sup>13</sup>C NMR  
125 MHz, CDCl<sub>3</sub>  
**5r**

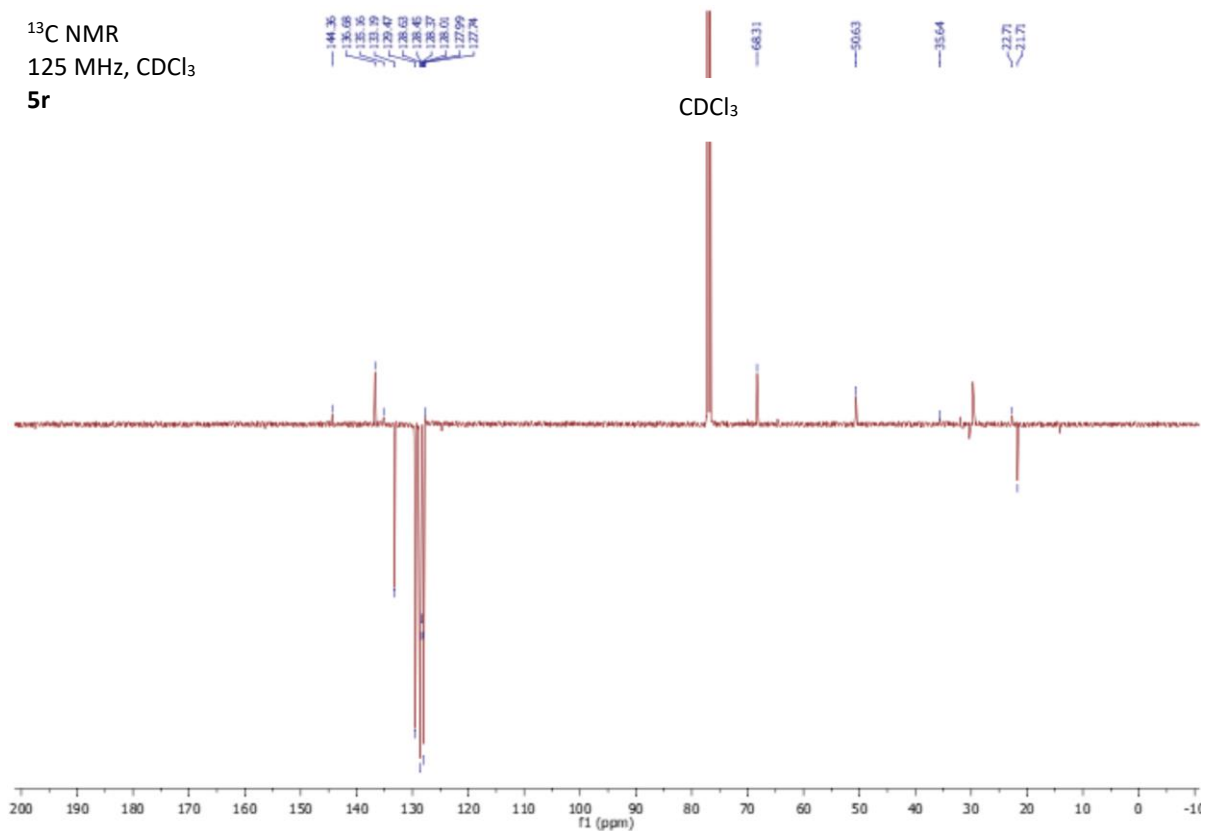

<sup>1</sup>H NMR  
500 MHz, CDCl<sub>3</sub>  
5s

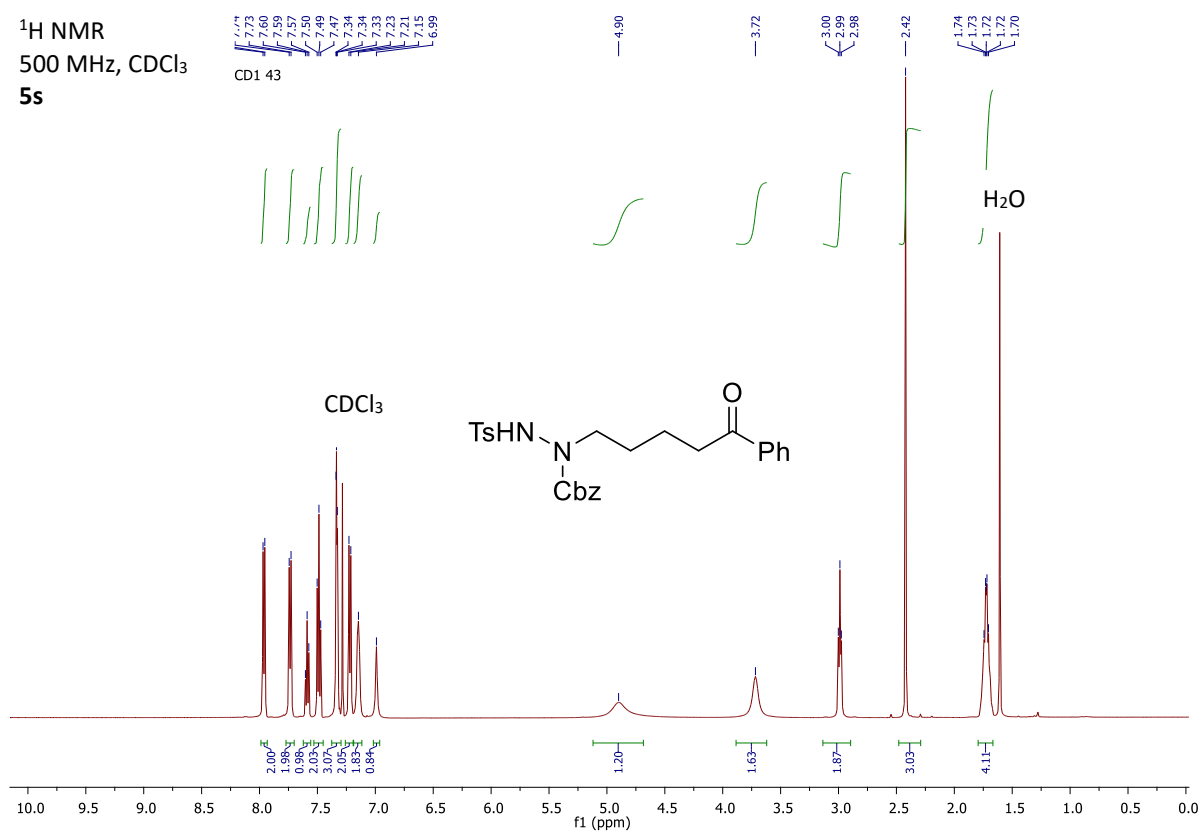

<sup>13</sup>C NMR  
125 MHz, CDCl<sub>3</sub>  
5s

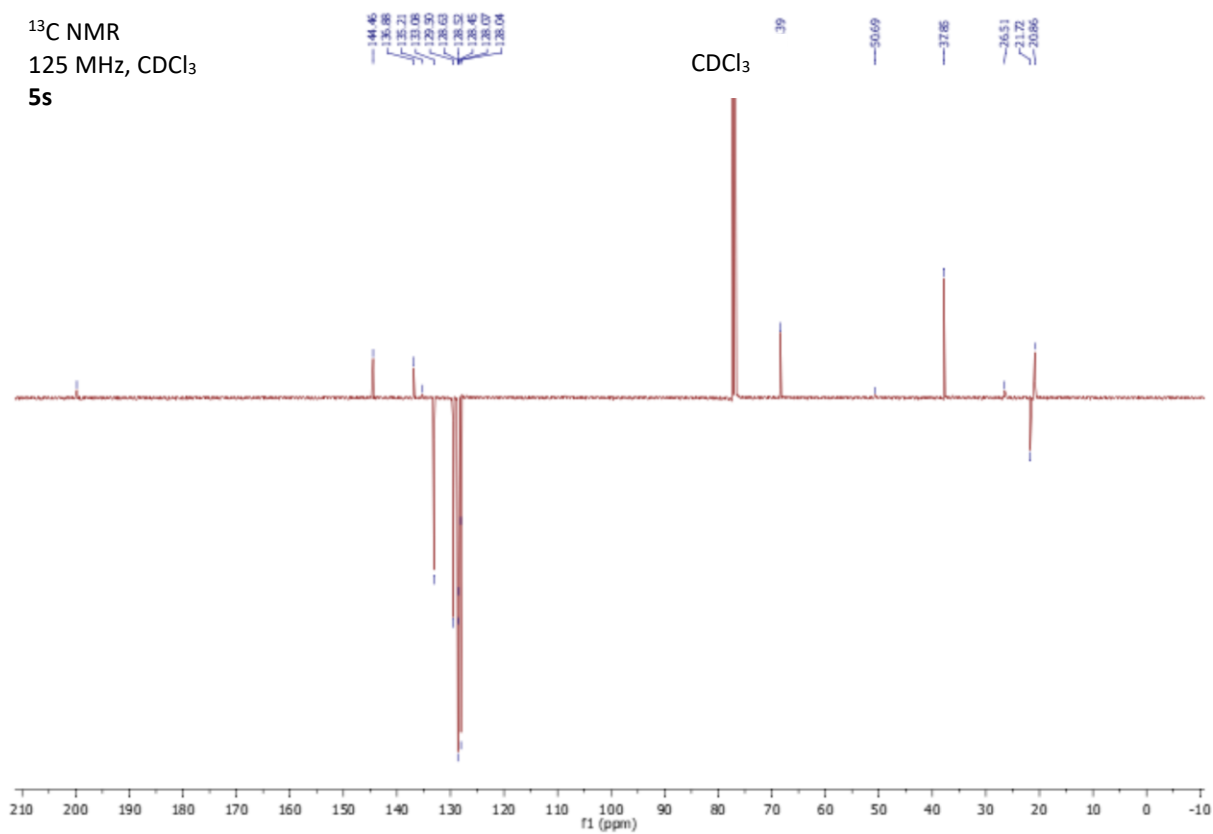

<sup>1</sup>H NMR  
400 MHz, CDCl<sub>3</sub>  
5t

Chemical structure of 5t: CC(C)(C)OC(=O)NCCC(=O)c1ccccc1

Peak list (ppm): 7.45, 7.28, 7.26, 6.37, 5.84, 3.52, 3.17, 2.39, 2.00, 1.64, 1.33.

Integration values: 2.00, 1.00, 1.00, 1.00, 0.98, 2.00, 2.00, 3.00, 2.00, 9.00.

<sup>13</sup>C NMR  
125 MHz, CDCl<sub>3</sub>  
**5t**

Chemical structure of **5t** is shown in the top right corner.

Peak list (ppm):

- 153.59
- 144.44
- 137.02
- 135.18
- 128.69
- 128.68
- 128.58
- 128.23
- 126.16
- 81.68
- 77.41
- 77.46
- 76.91
- 49.54
- 35.49
- 28.10
- 21.71
- 21.20

<sup>1</sup>H NMR  
500 MHz, CDCl<sub>3</sub>  
**5u**

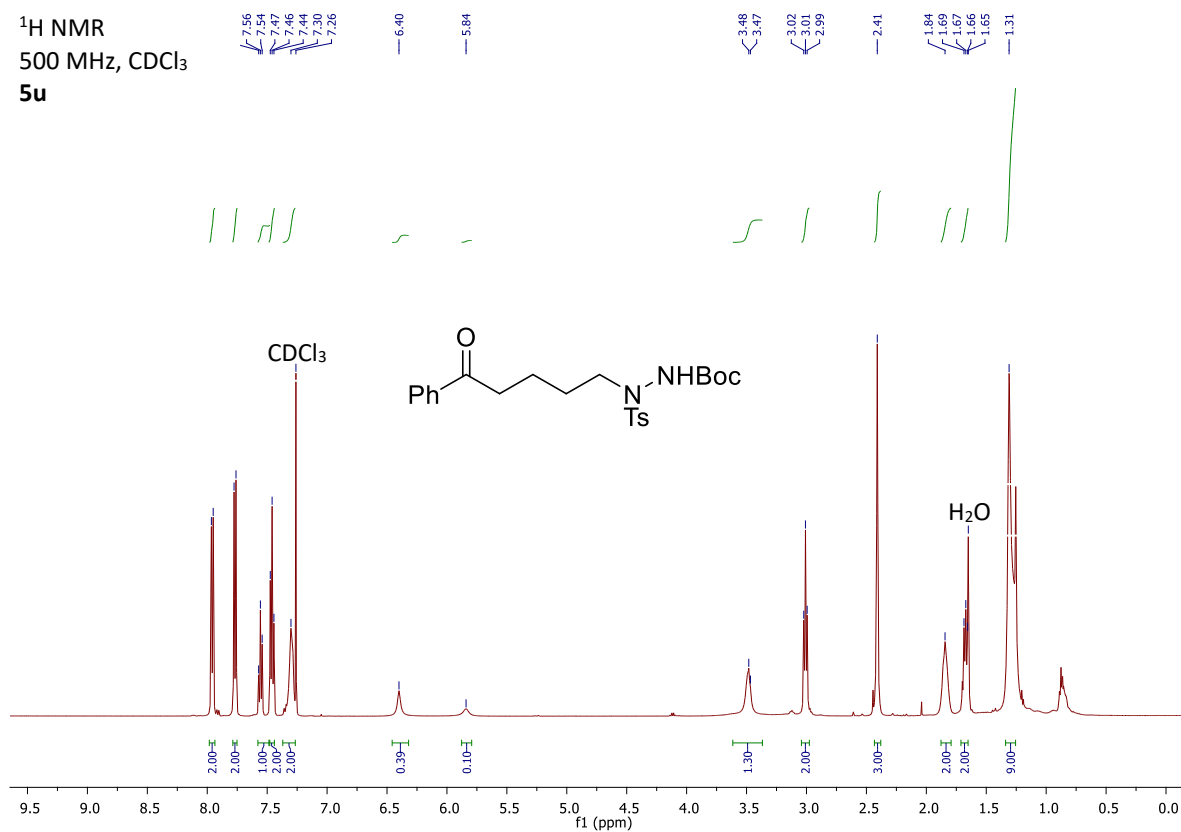

<sup>13</sup>C NMR  
125 MHz, CDCl<sub>3</sub>  
**5u**

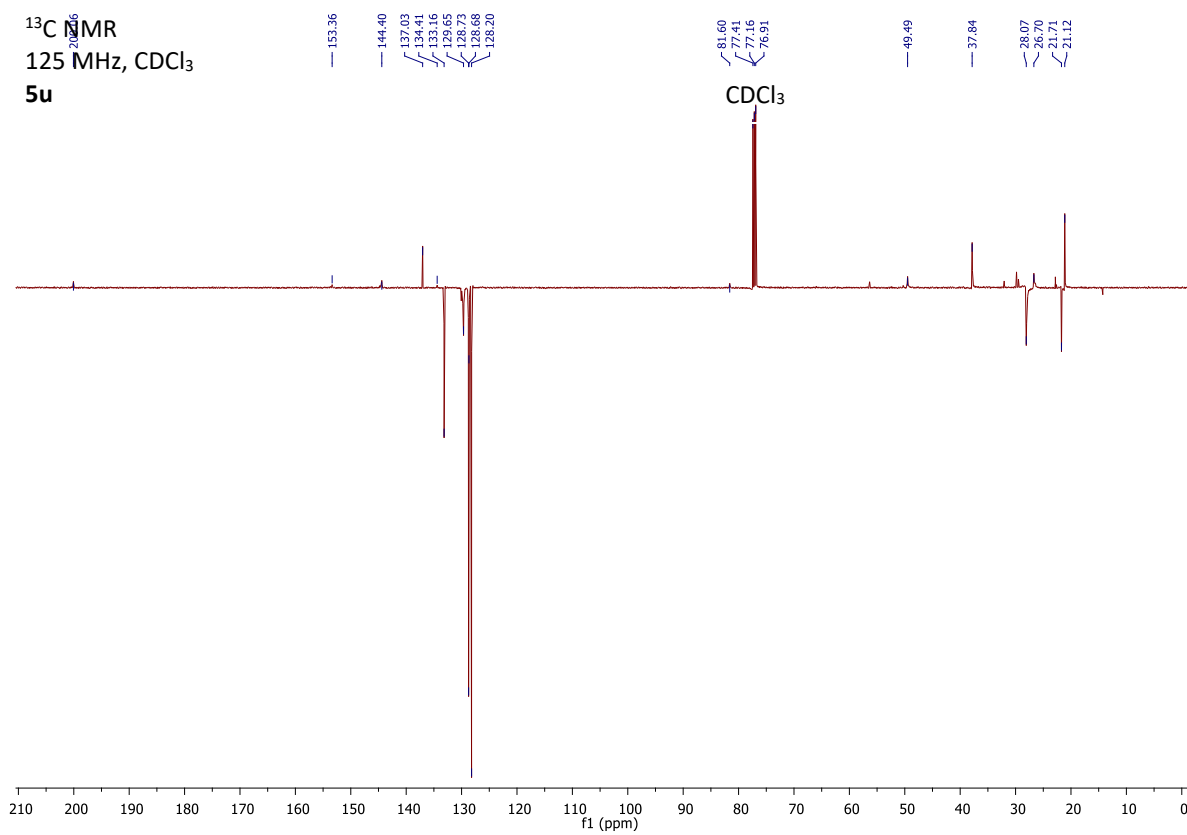

<sup>1</sup>H NMR  
300 MHz, CDCl<sub>3</sub>  
5v

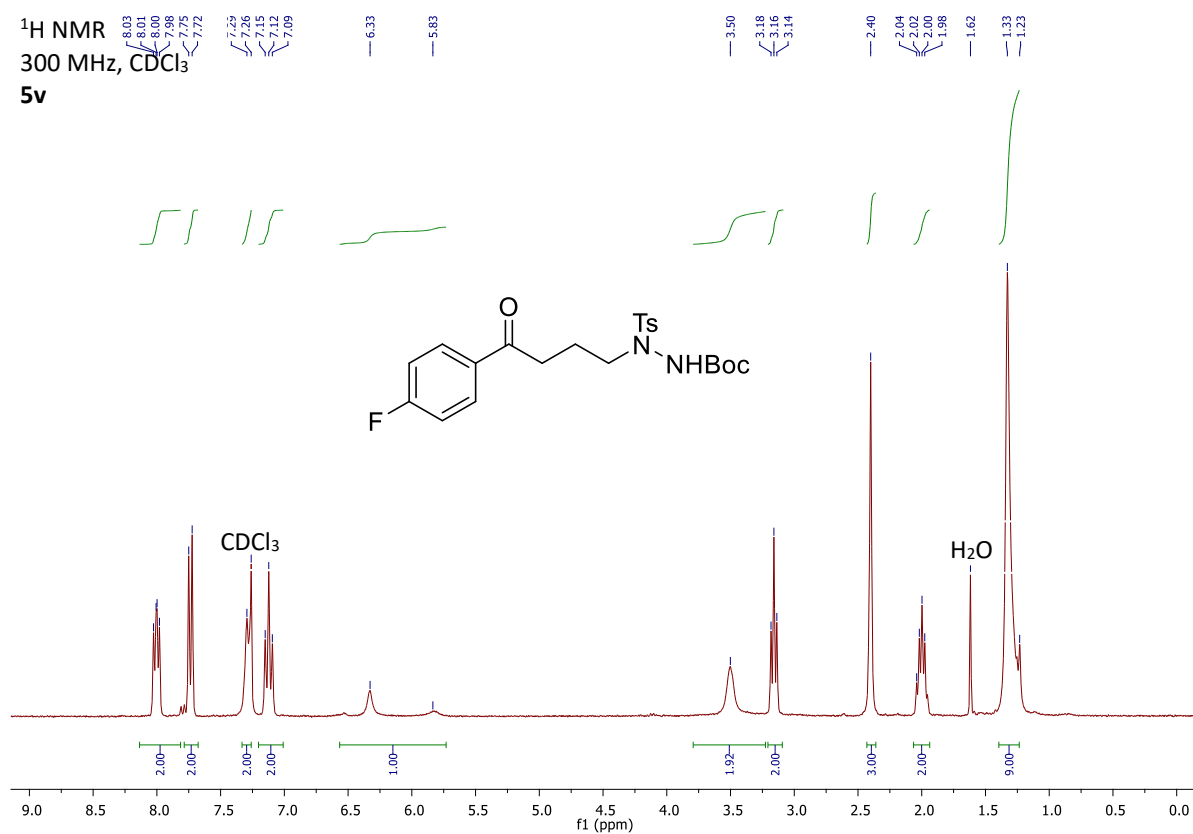

<sup>13</sup>C NMR  
125 MHz, CDCl<sub>3</sub>  
5v

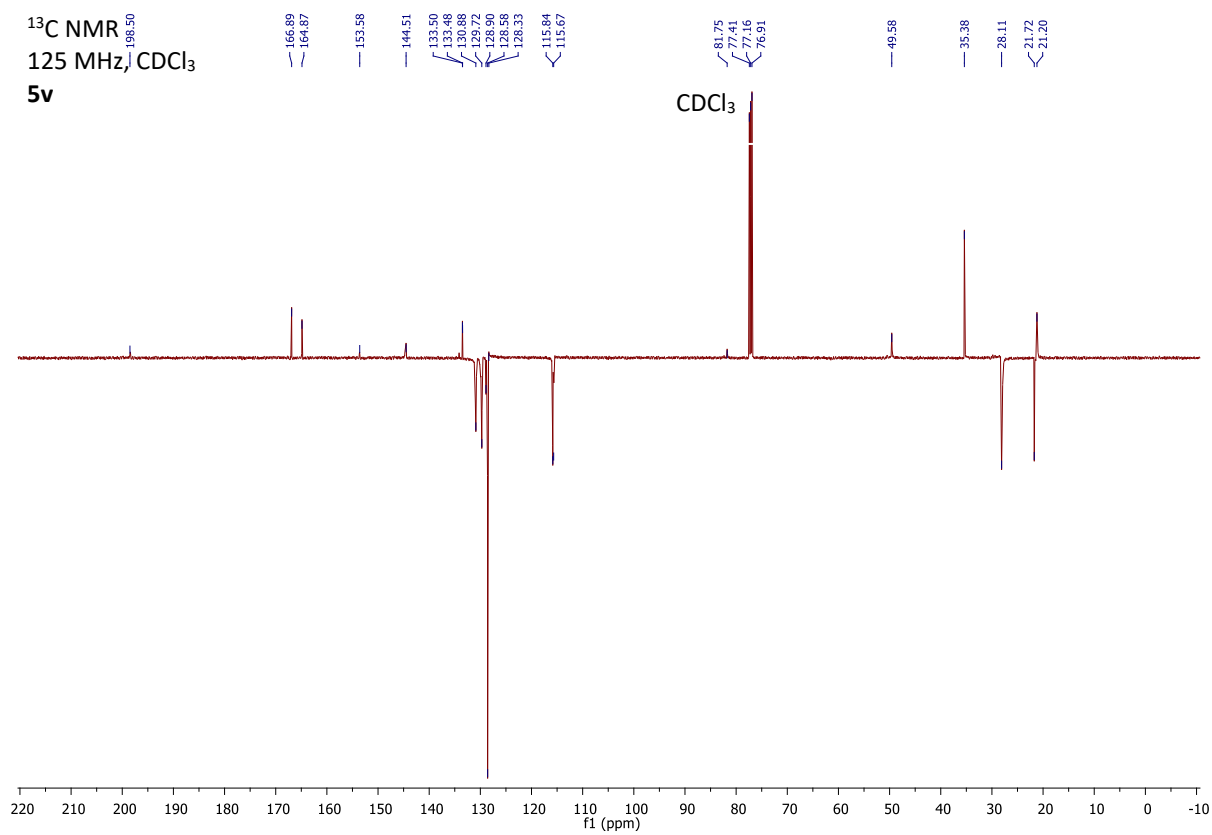



<sup>1</sup>H NMR  
400 MHz, CDCl<sub>3</sub>  
**6a**

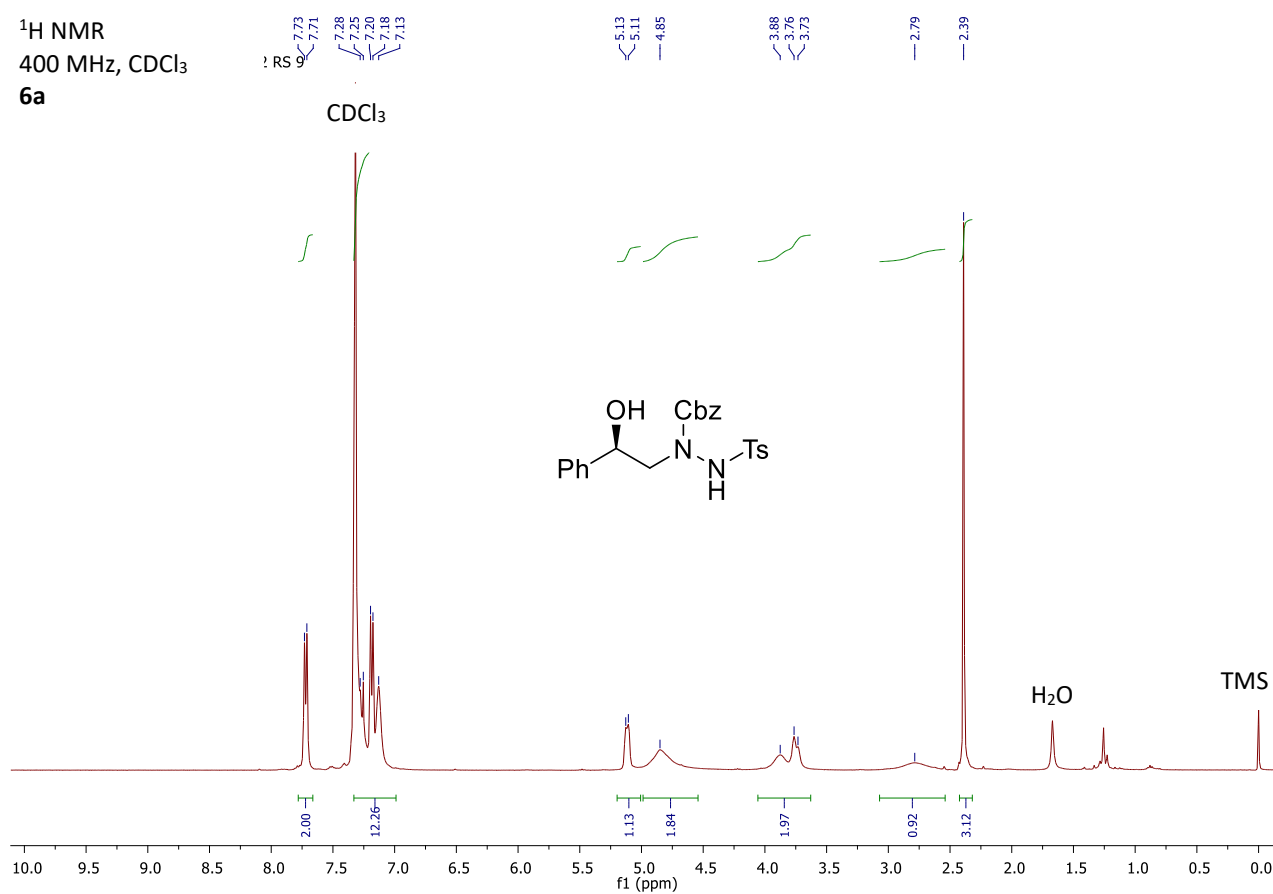

<sup>13</sup>C NMR  
100 MHz, CDCl<sub>3</sub>  
**6a**

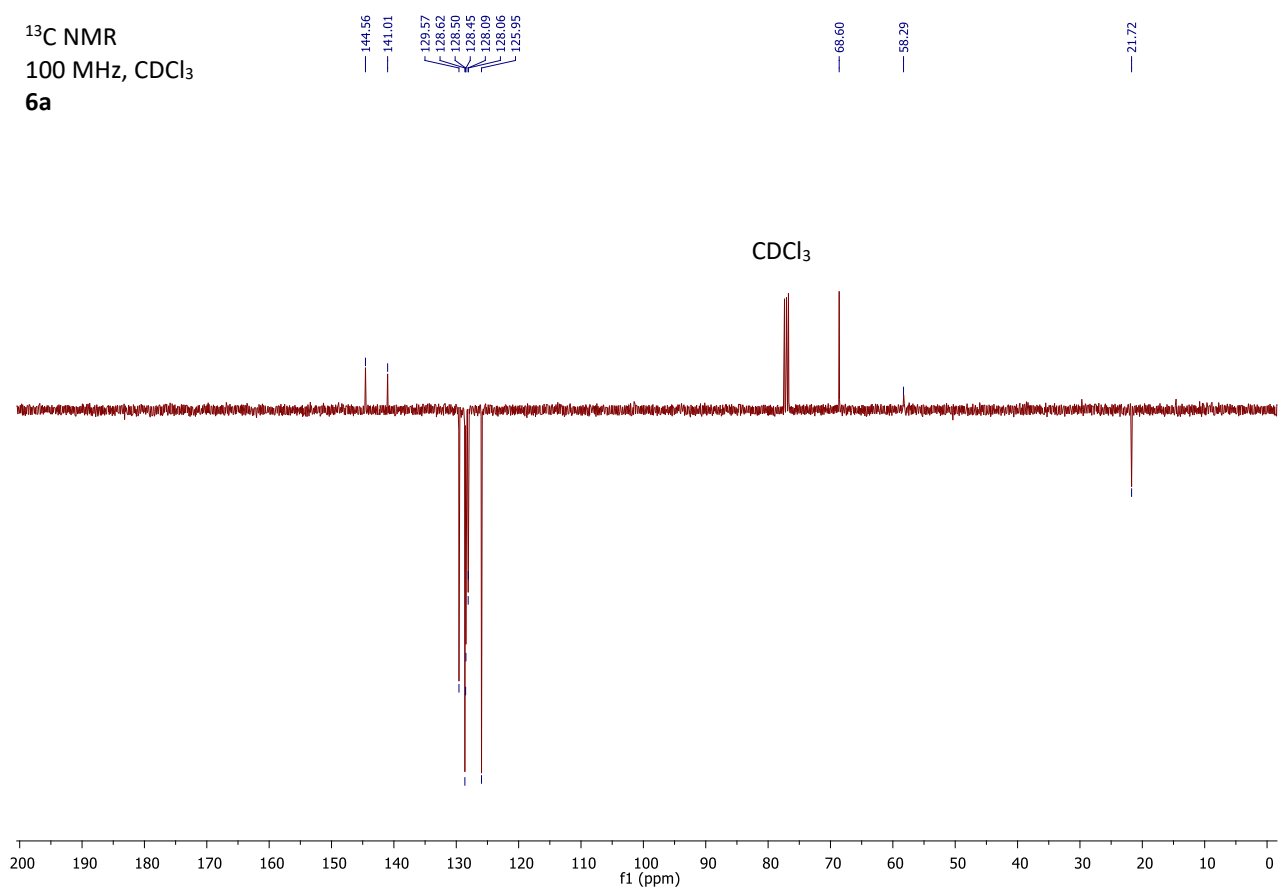

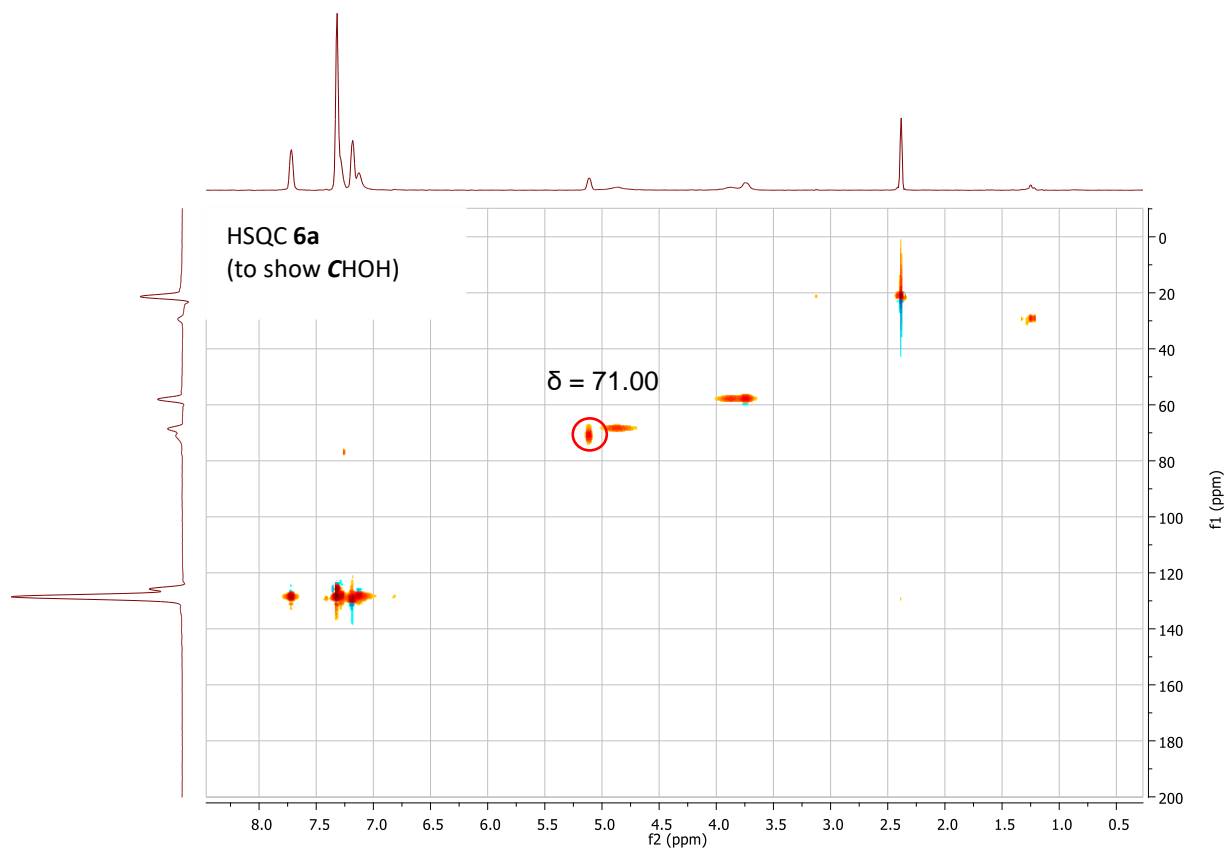

<sup>1</sup>H NMR  
500 MHz, CDCl<sub>3</sub>  
**6b**

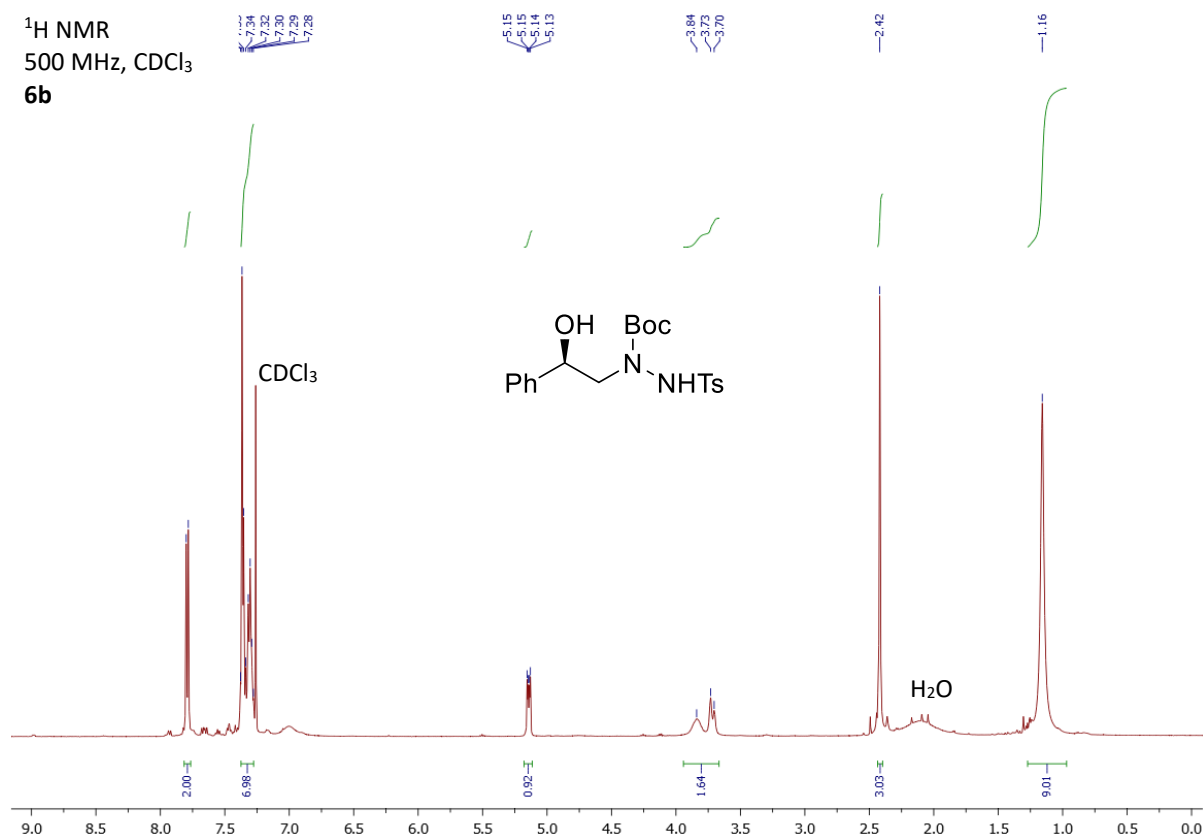

<sup>13</sup>C NMR  
125 MHz, CDCl<sub>3</sub>  
**6b**

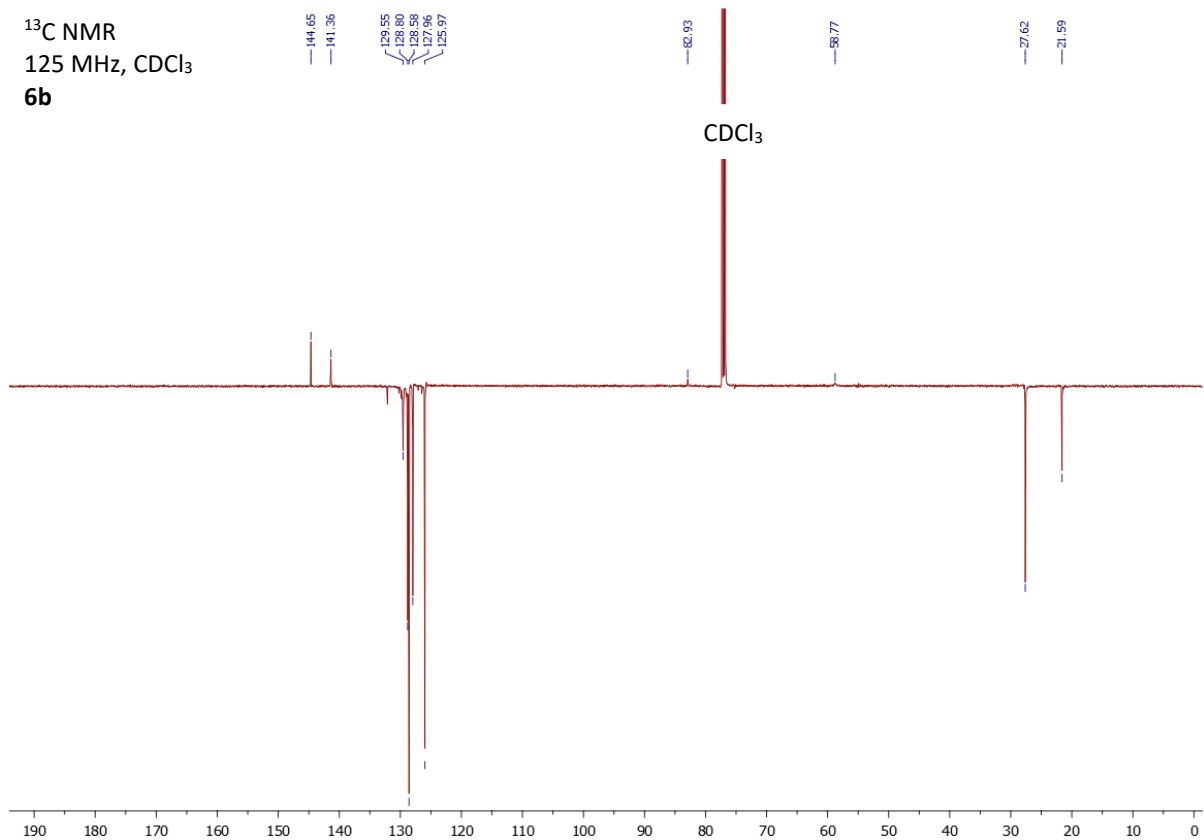

154

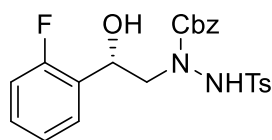

$\frac{1}{2} \times 100 = 50$

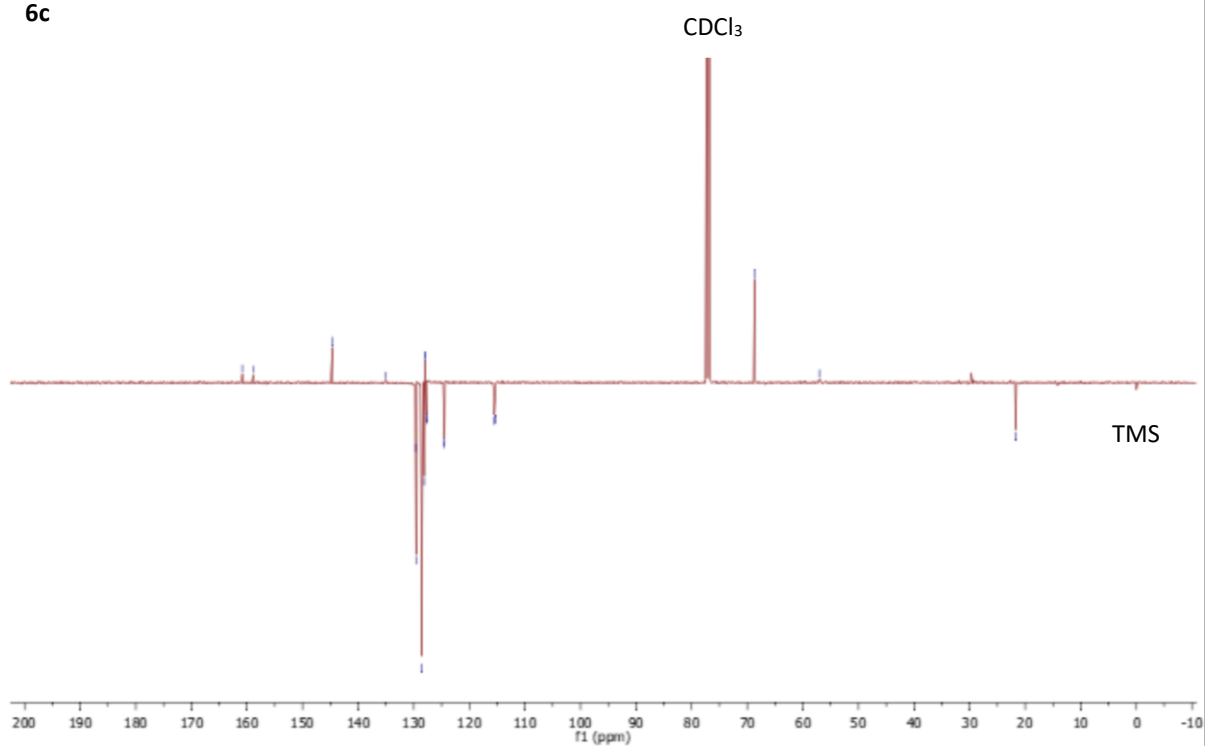

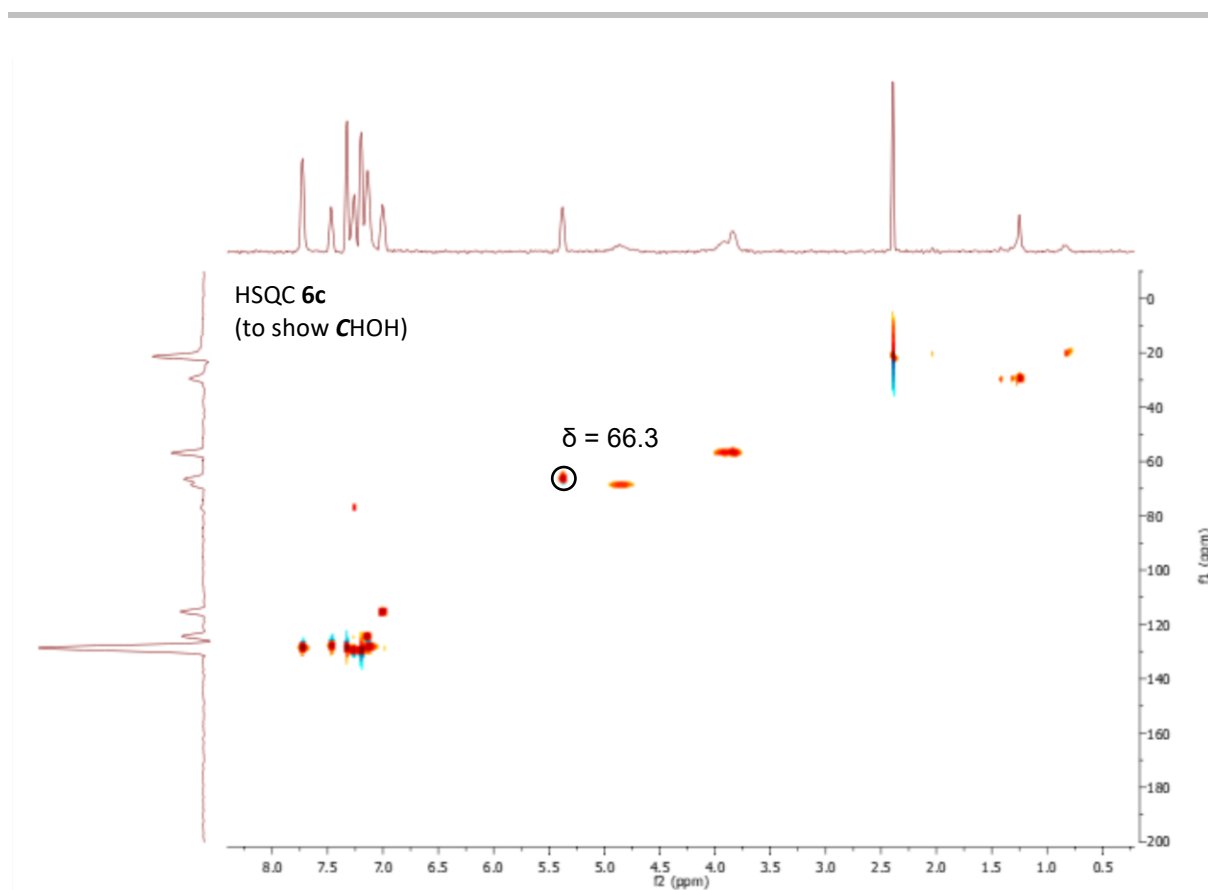

<sup>1</sup>H NMR  
500 MHz, d6-DMSO  
(at 373 K)  
**6d**

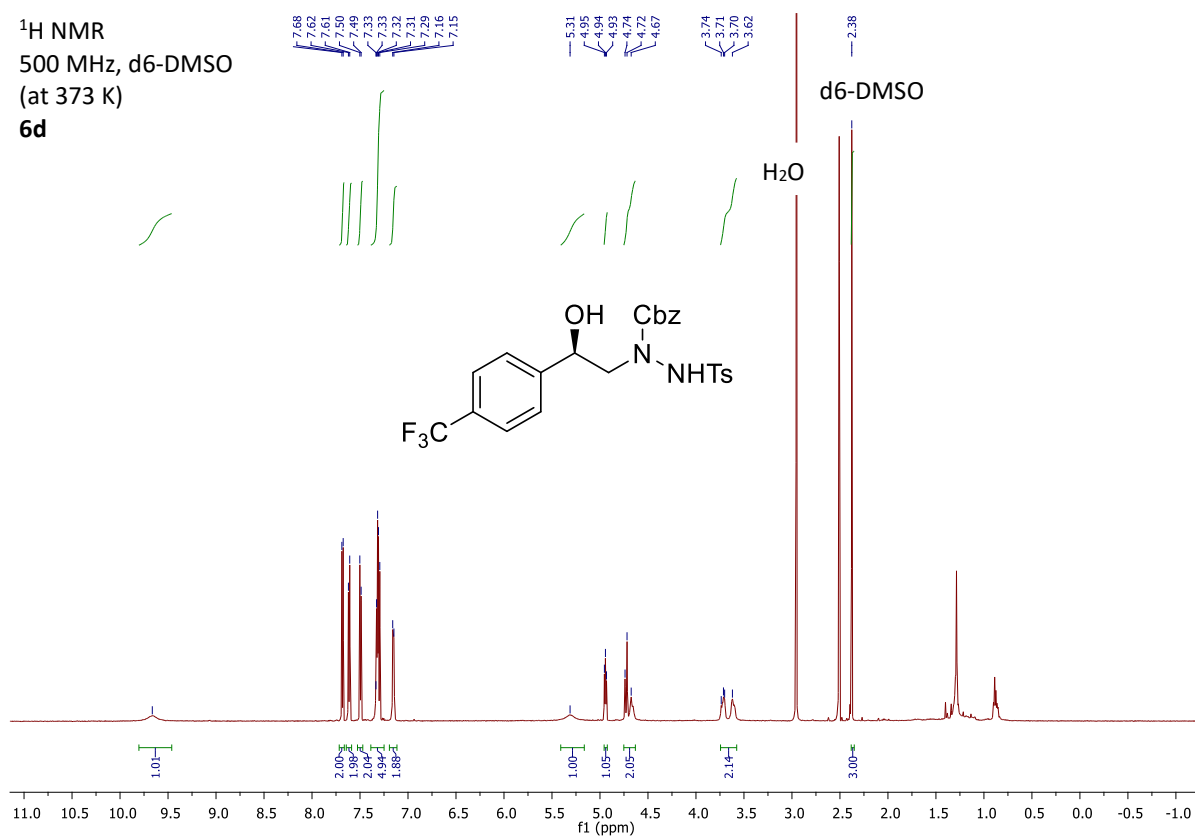

<sup>13</sup>C NMR  
125 MHz, d6-DMSO  
(at 373 K)  
**6d**

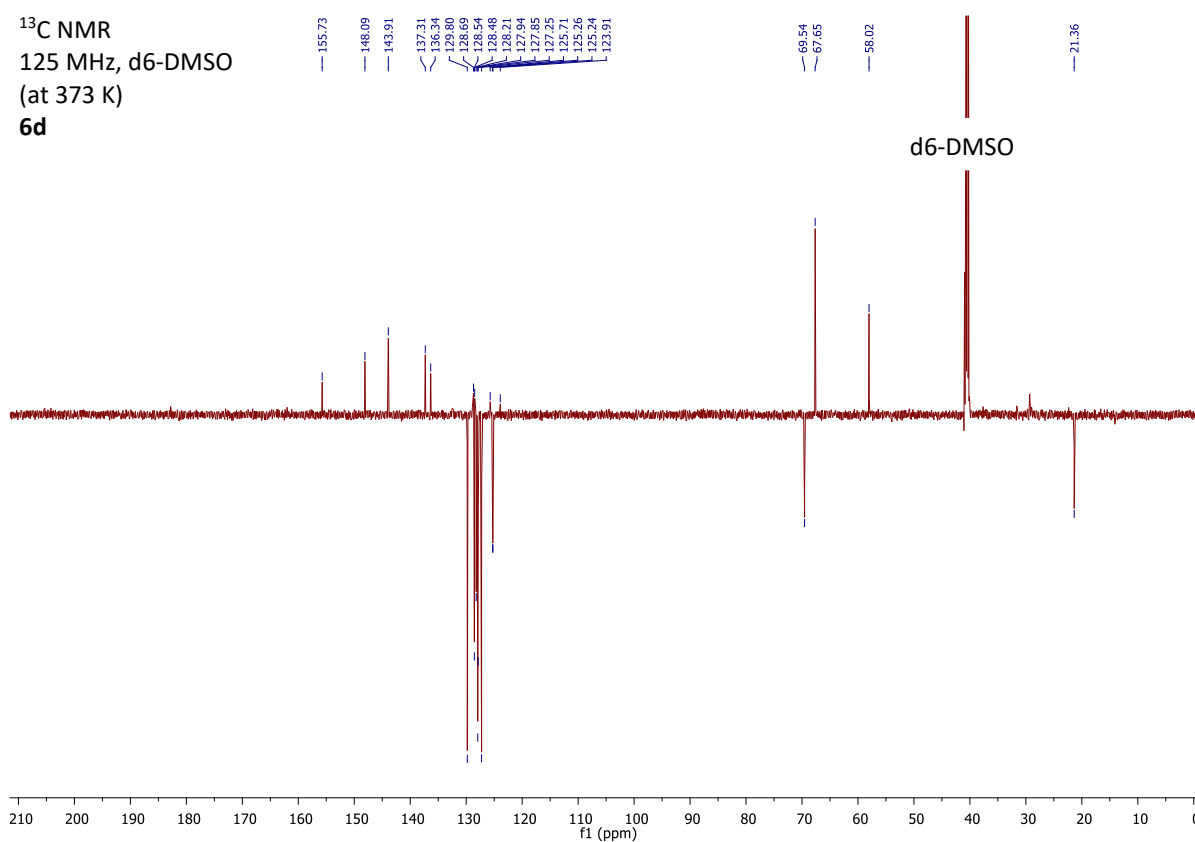

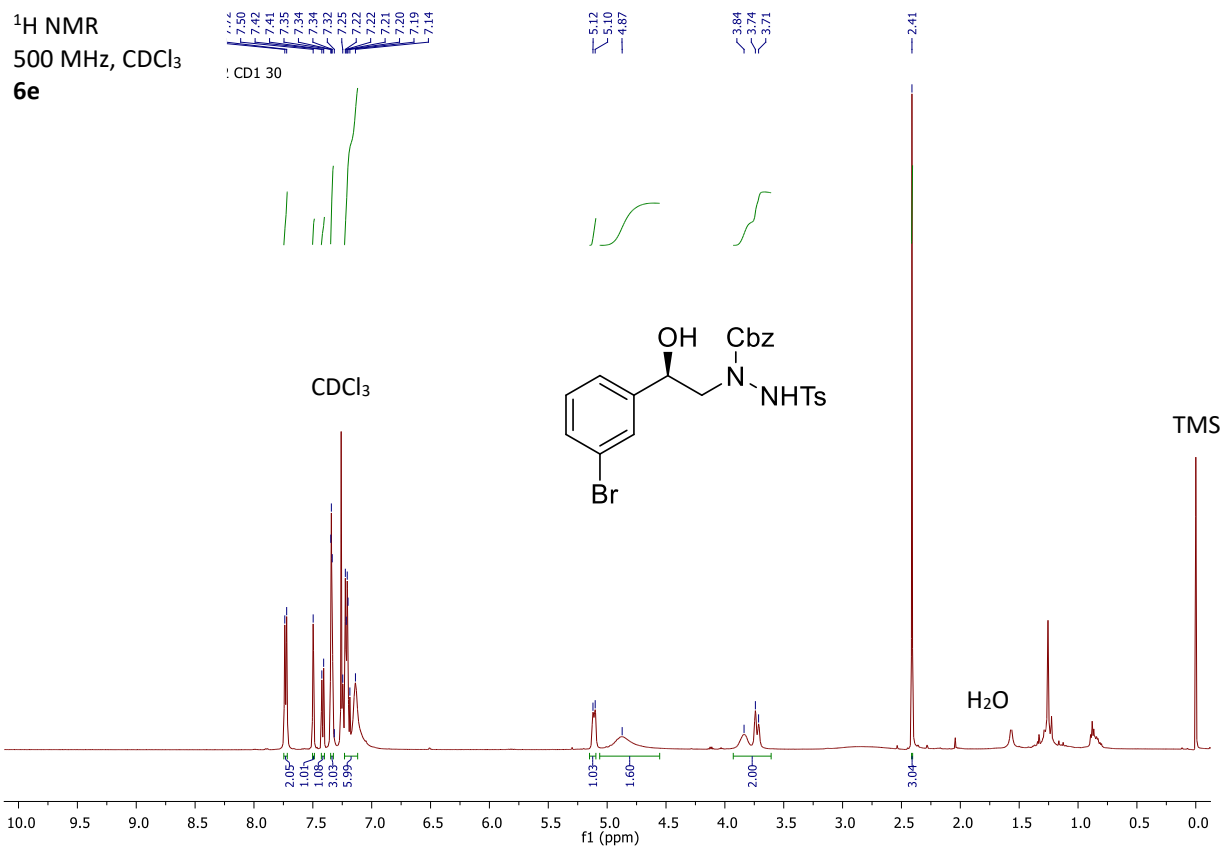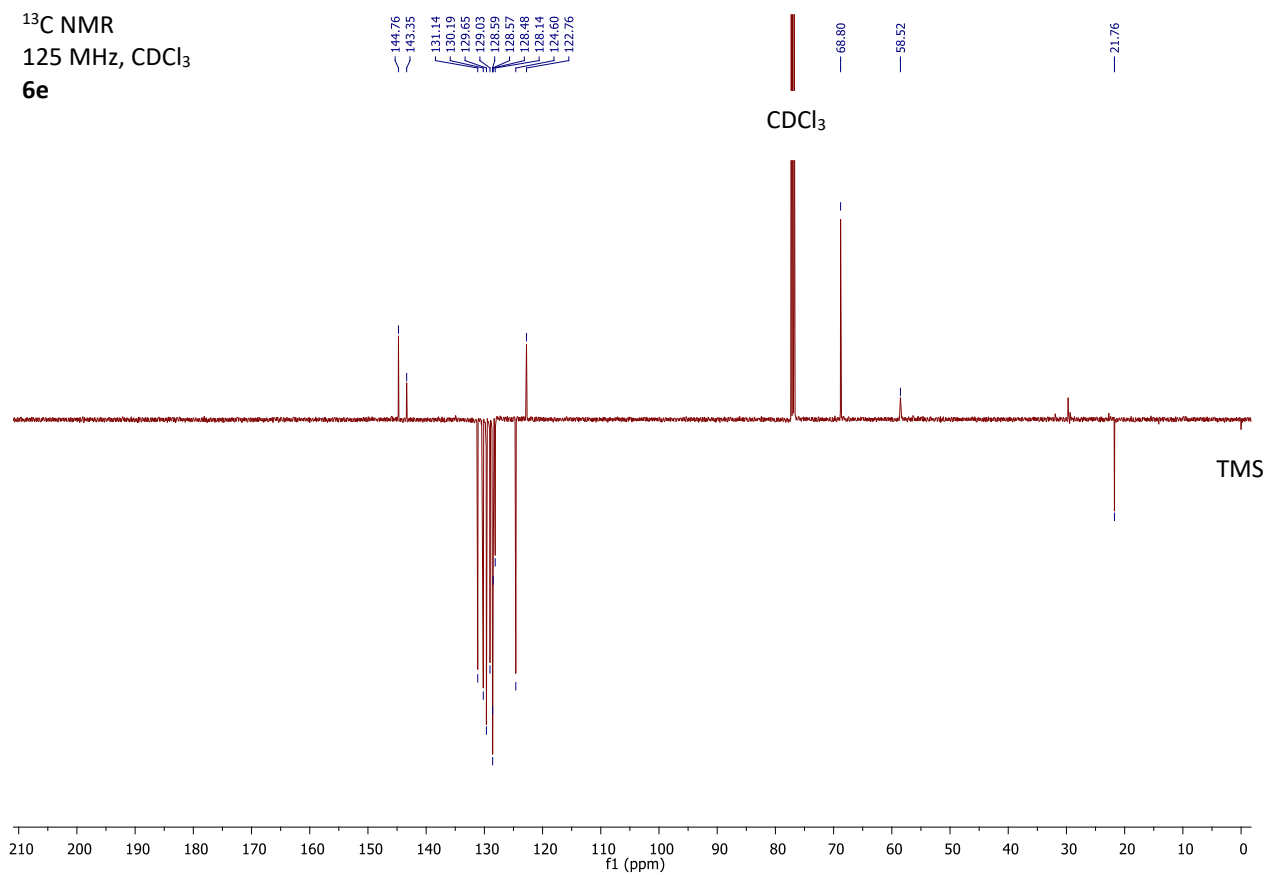

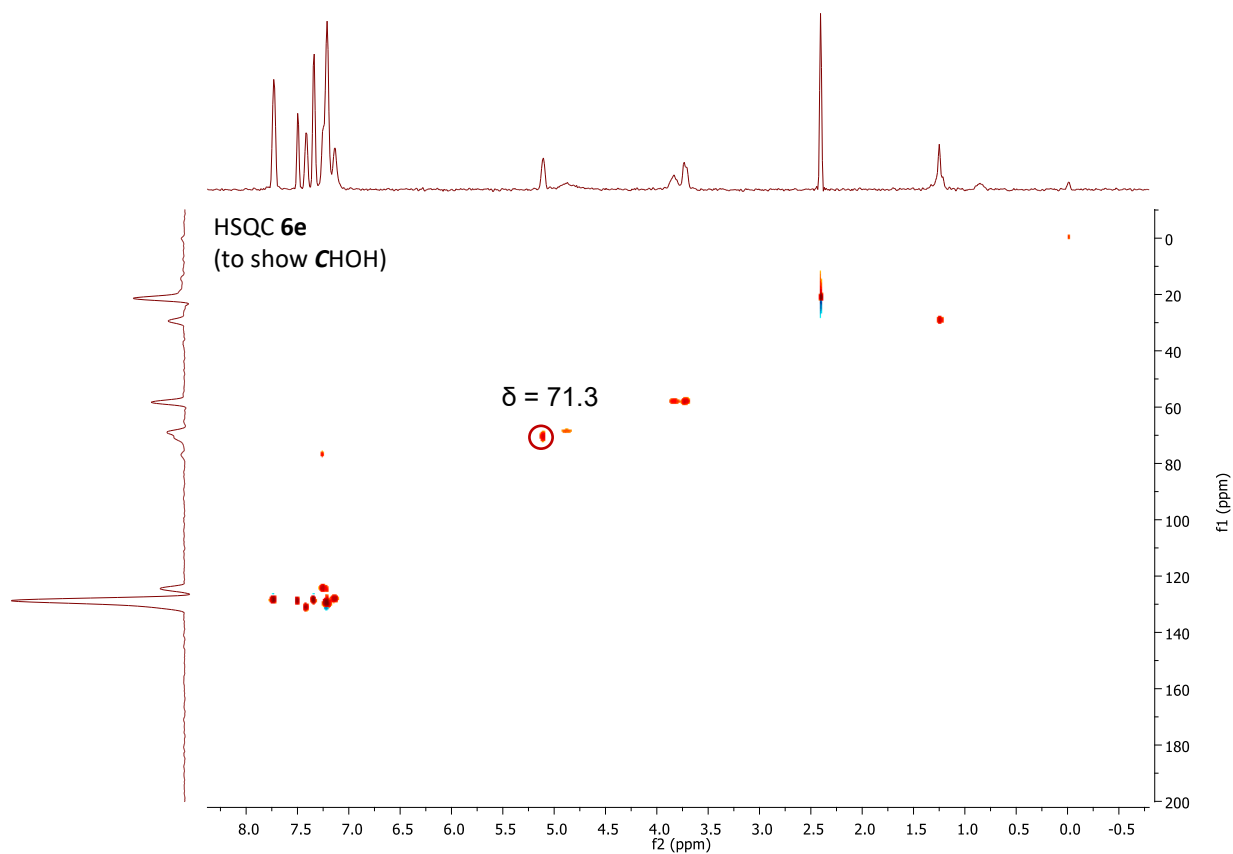



<sup>1</sup>H NMR  
500 MHz, CDCl<sub>3</sub>  
**6f**

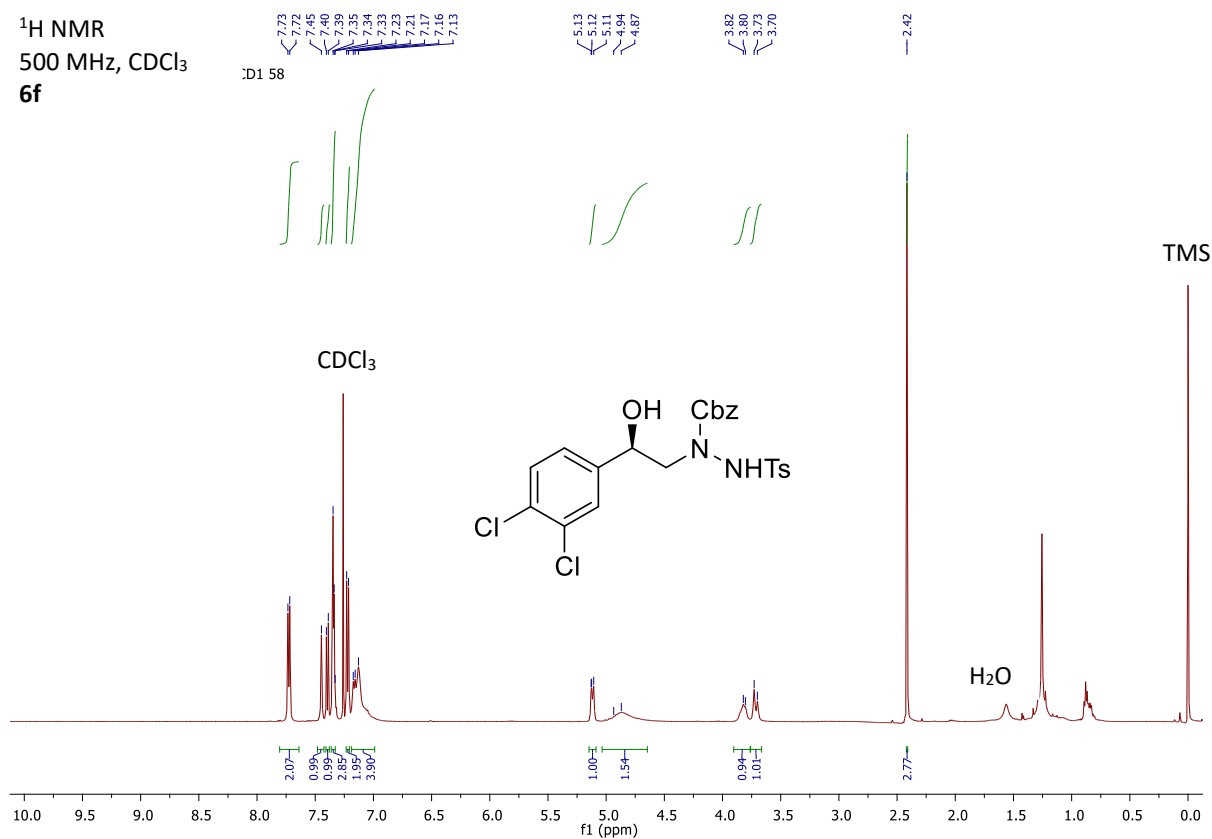

<sup>13</sup>C NMR  
125 MHz, CDCl<sub>3</sub>  
**6f**

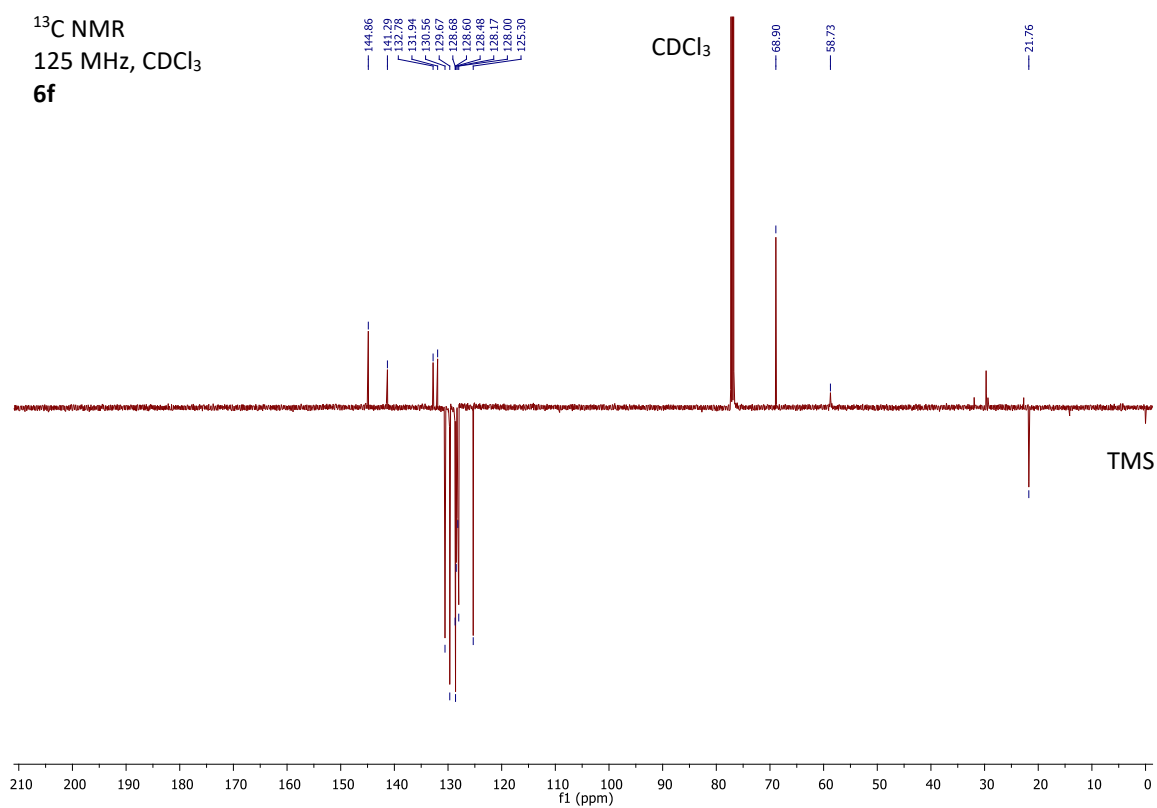

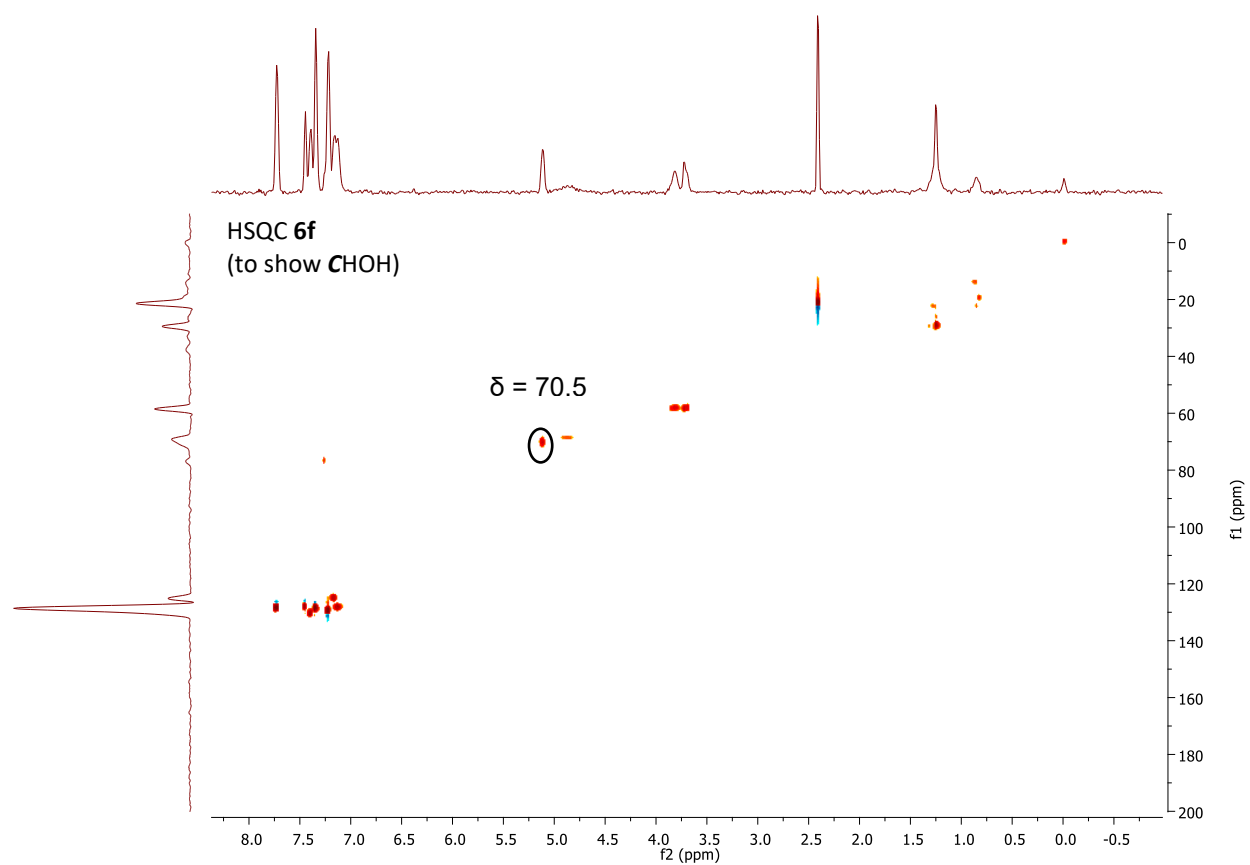

<sup>1</sup>H NMR  
500 MHz, CDCl<sub>3</sub>  
**6g**

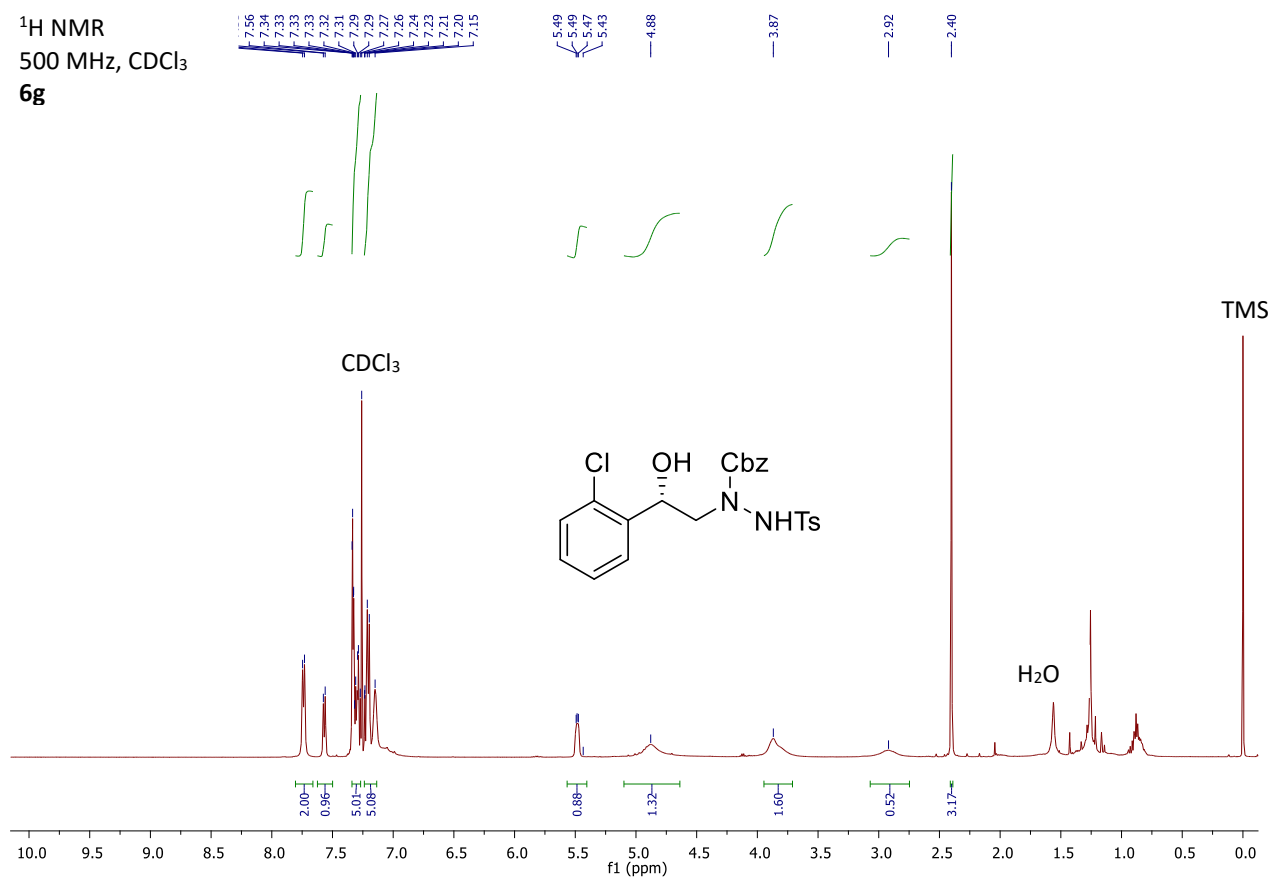

<sup>13</sup>C NMR  
125 MHz, CDCl<sub>3</sub>  
**6g**

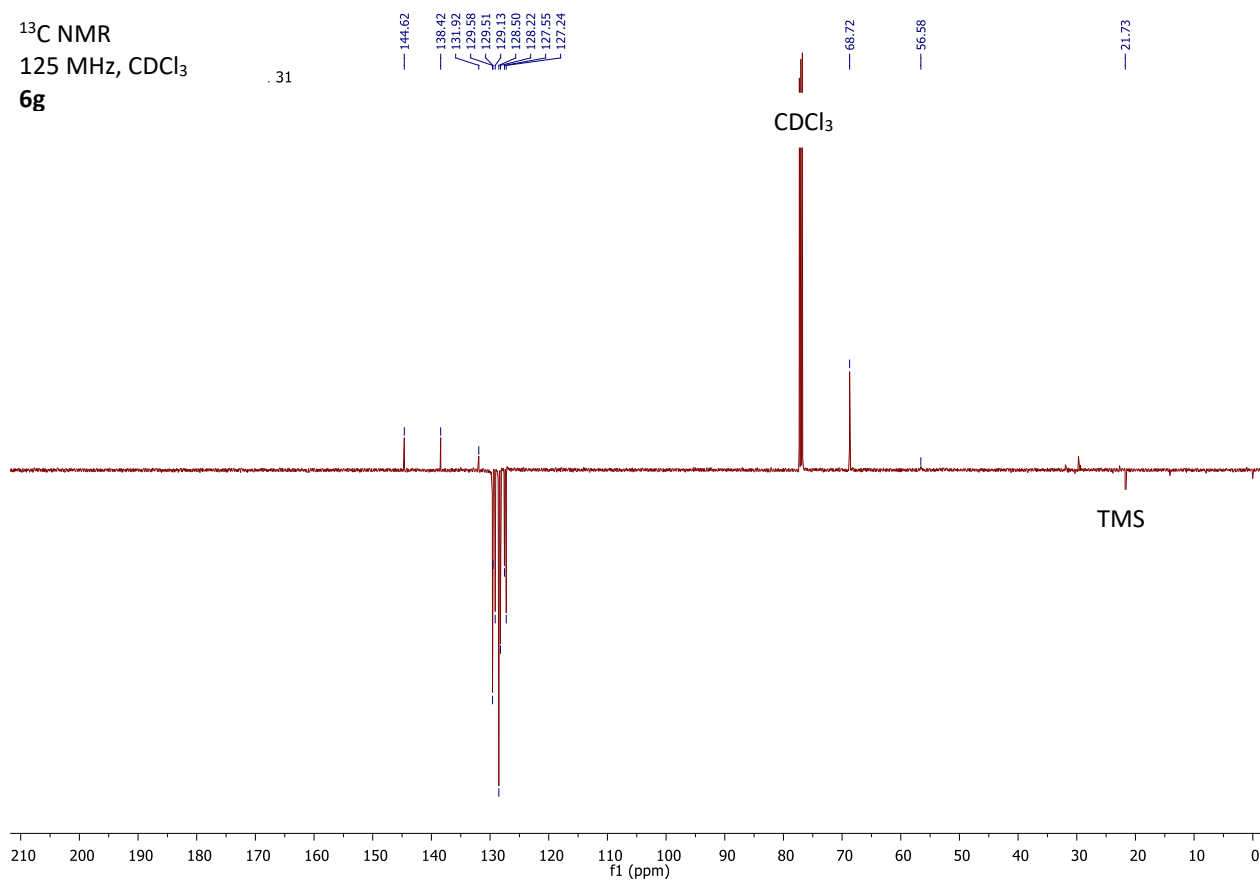

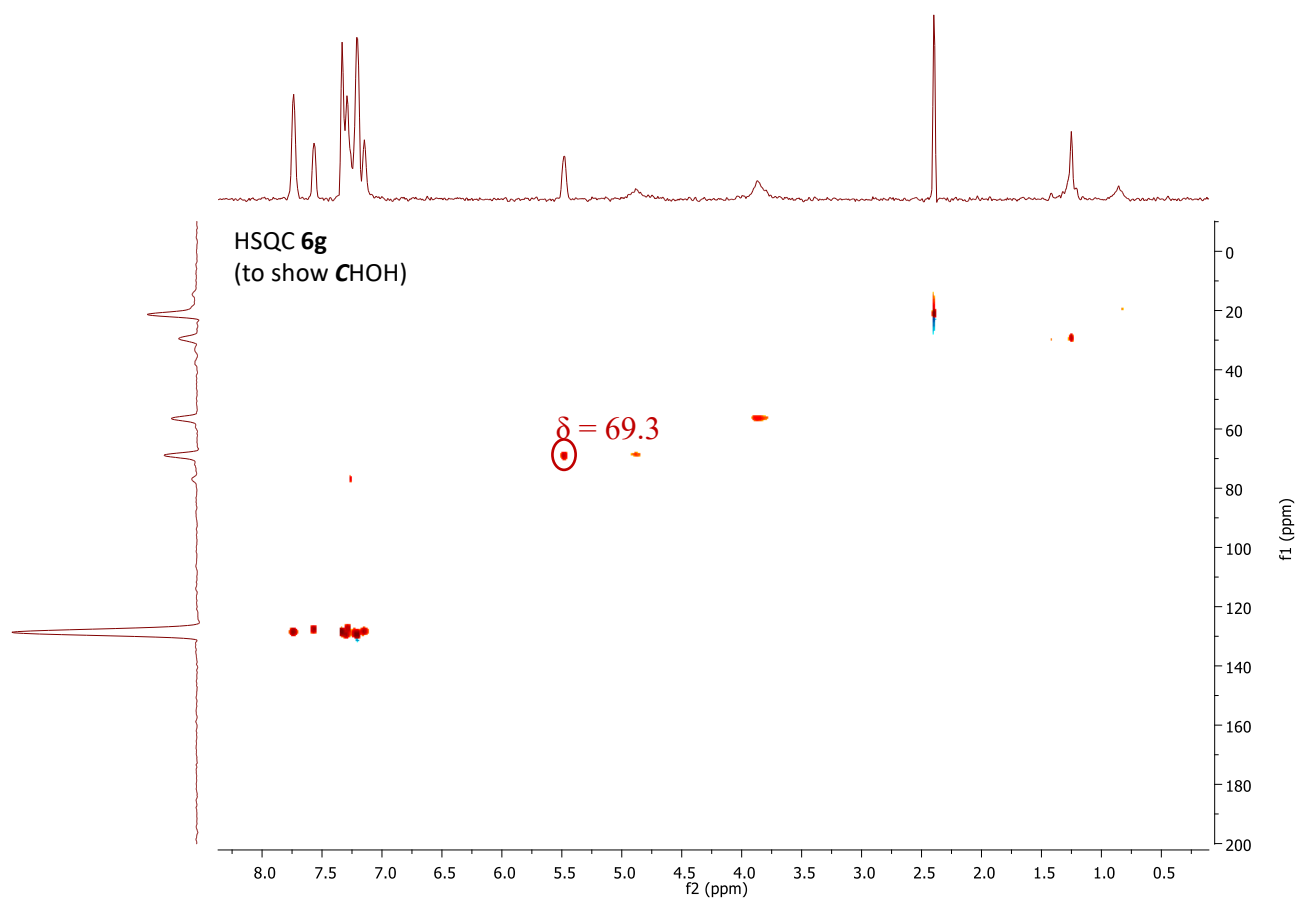

<sup>1</sup>H NMR  
500 MHz, CDCl<sub>3</sub>  
**6h**

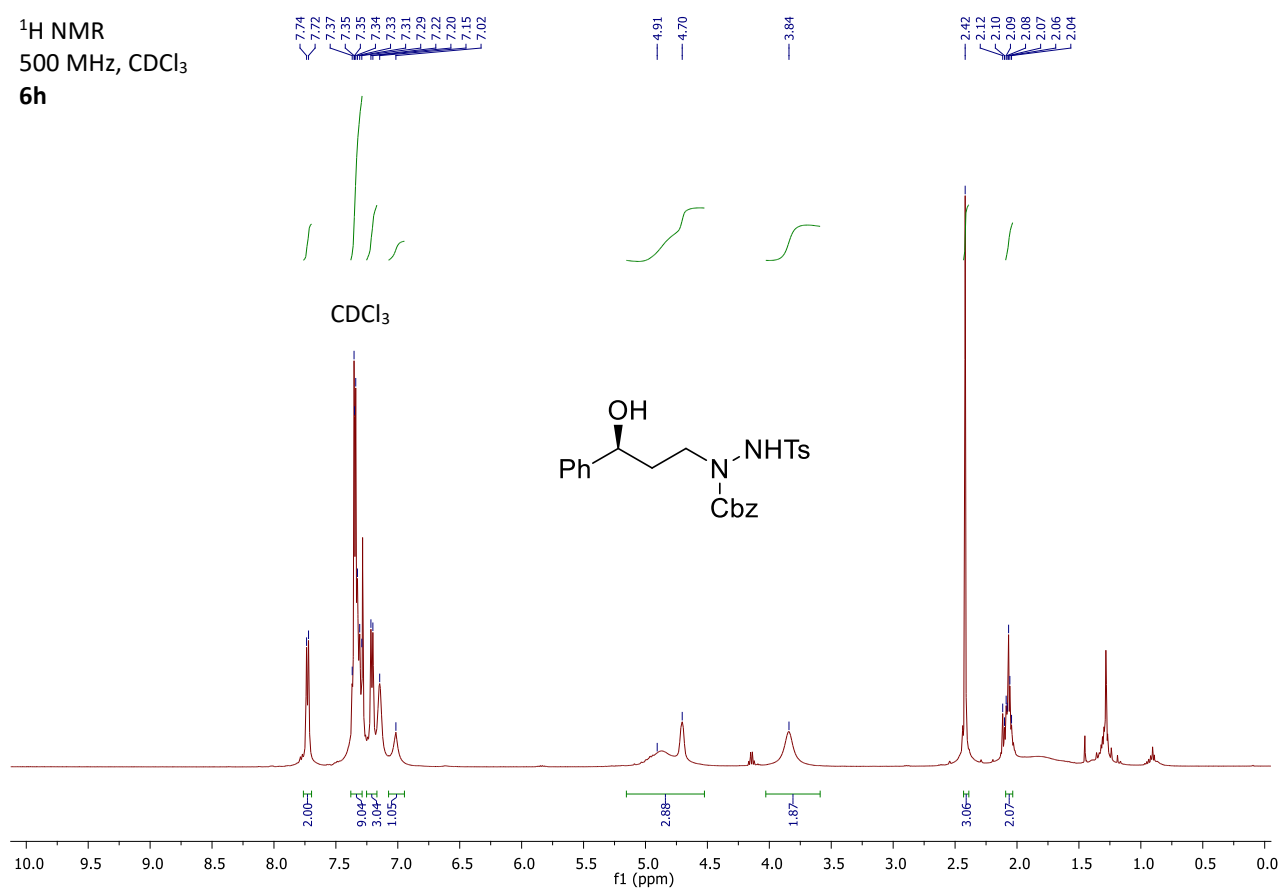

<sup>13</sup>C NMR  
125 MHz, CDCl<sub>3</sub>  
**6h**

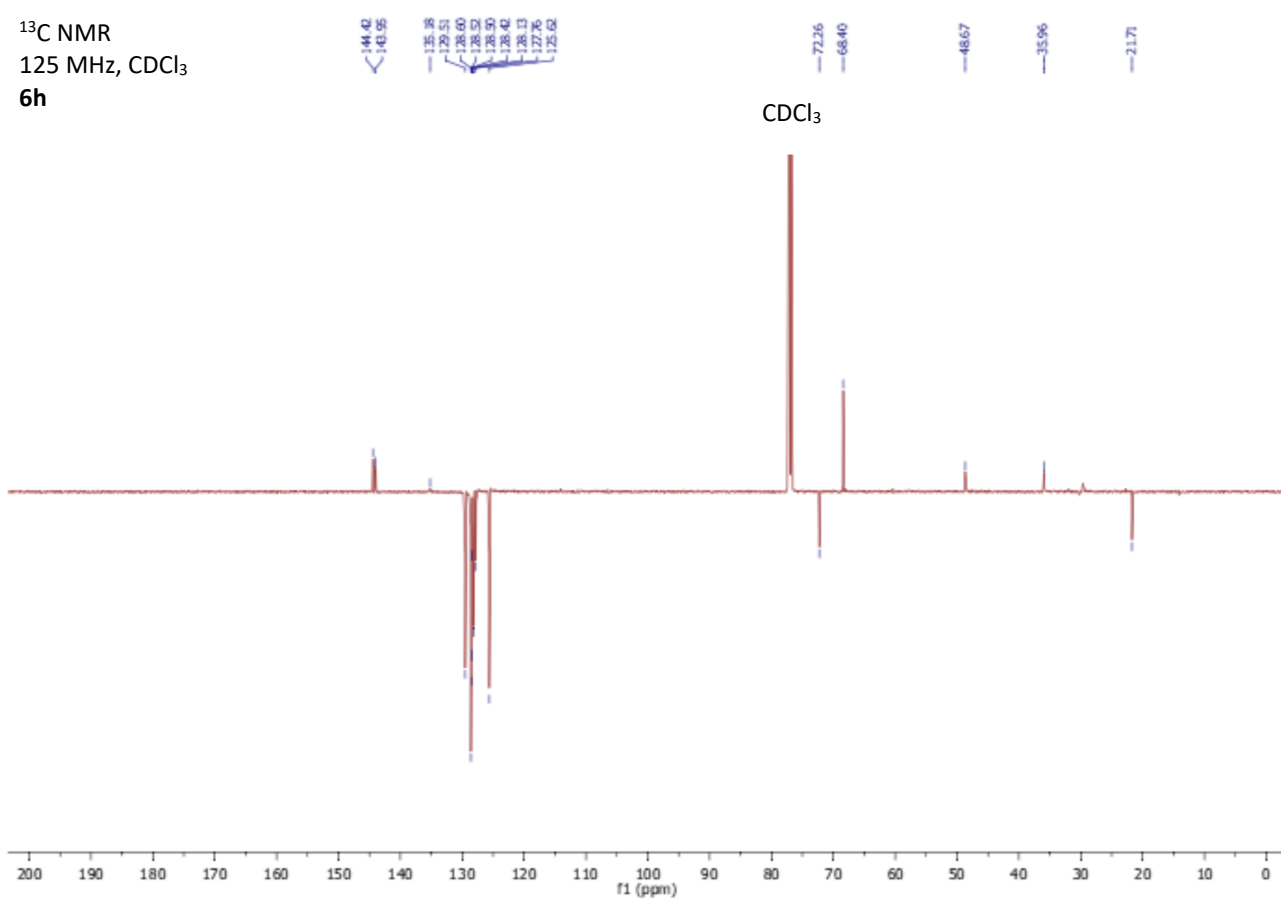

<sup>1</sup>H NMR  
500 MHz, CDCl<sub>3</sub>  
**6i**

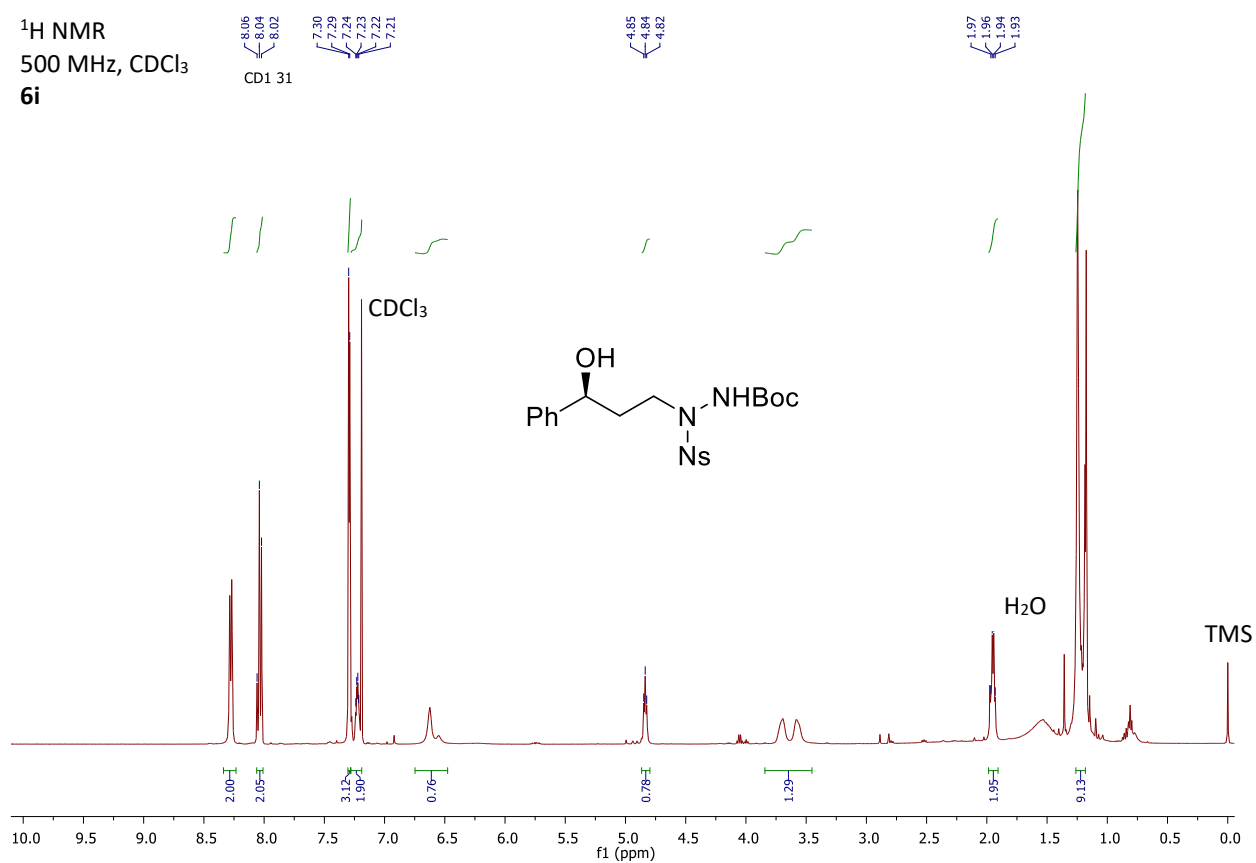

May08-2018

<sup>13</sup>C NMR  
125 MHz, CDCl<sub>3</sub>  
**6i**

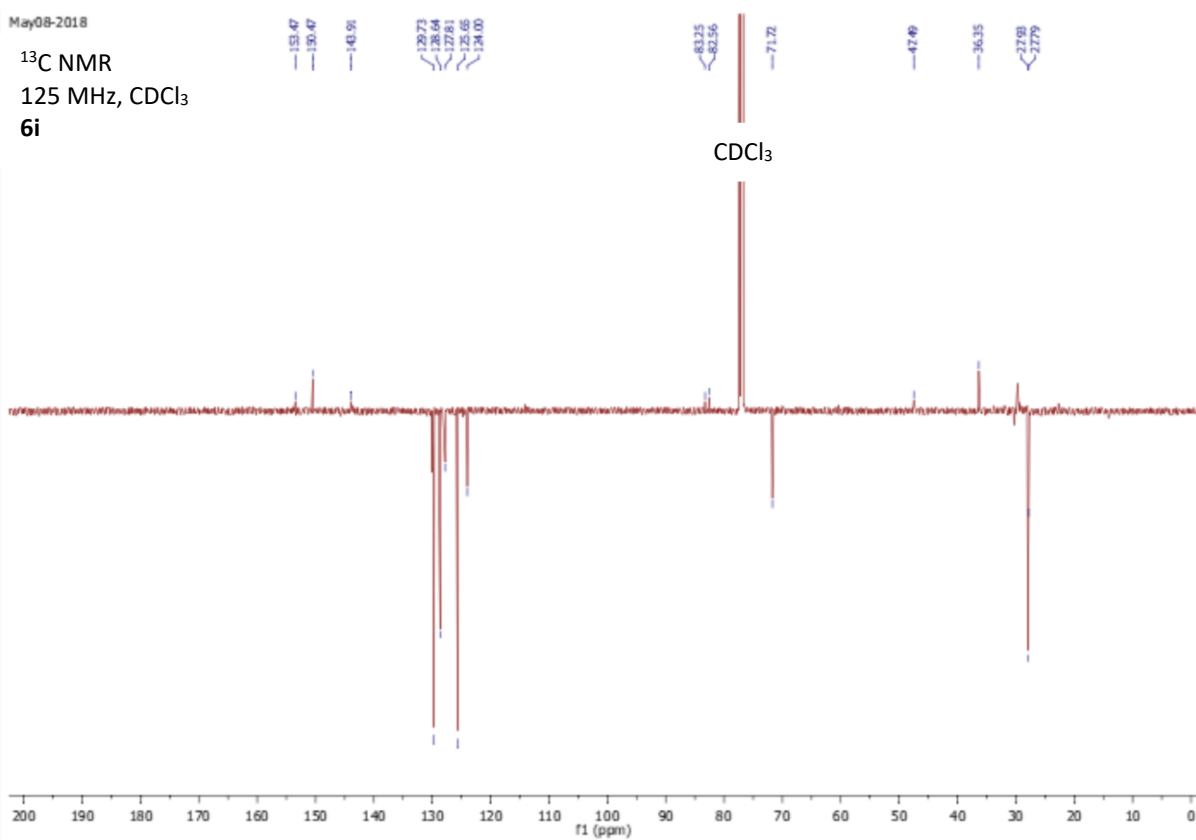

<sup>1</sup>H NMR  
400 MHz, CDCl<sub>3</sub>  
6j

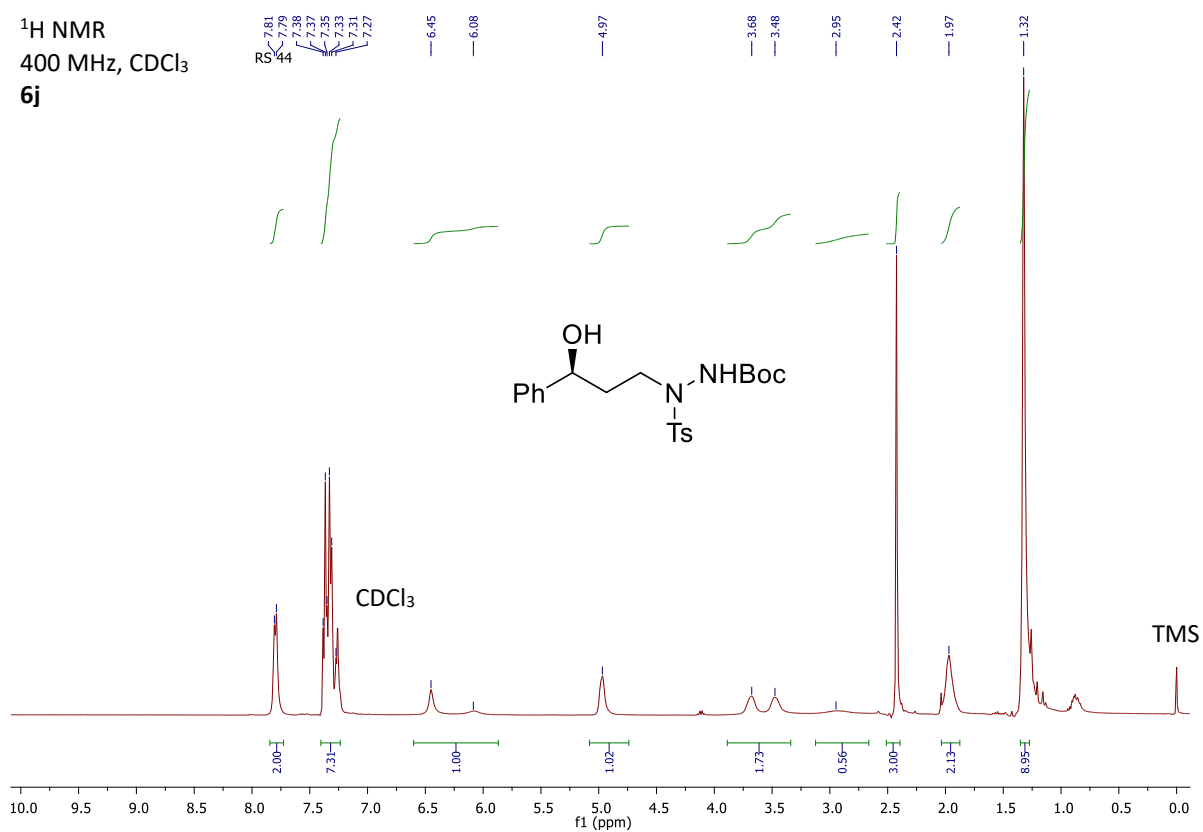

<sup>13</sup>C NMR  
100 MHz, CDCl<sub>3</sub>  
6j

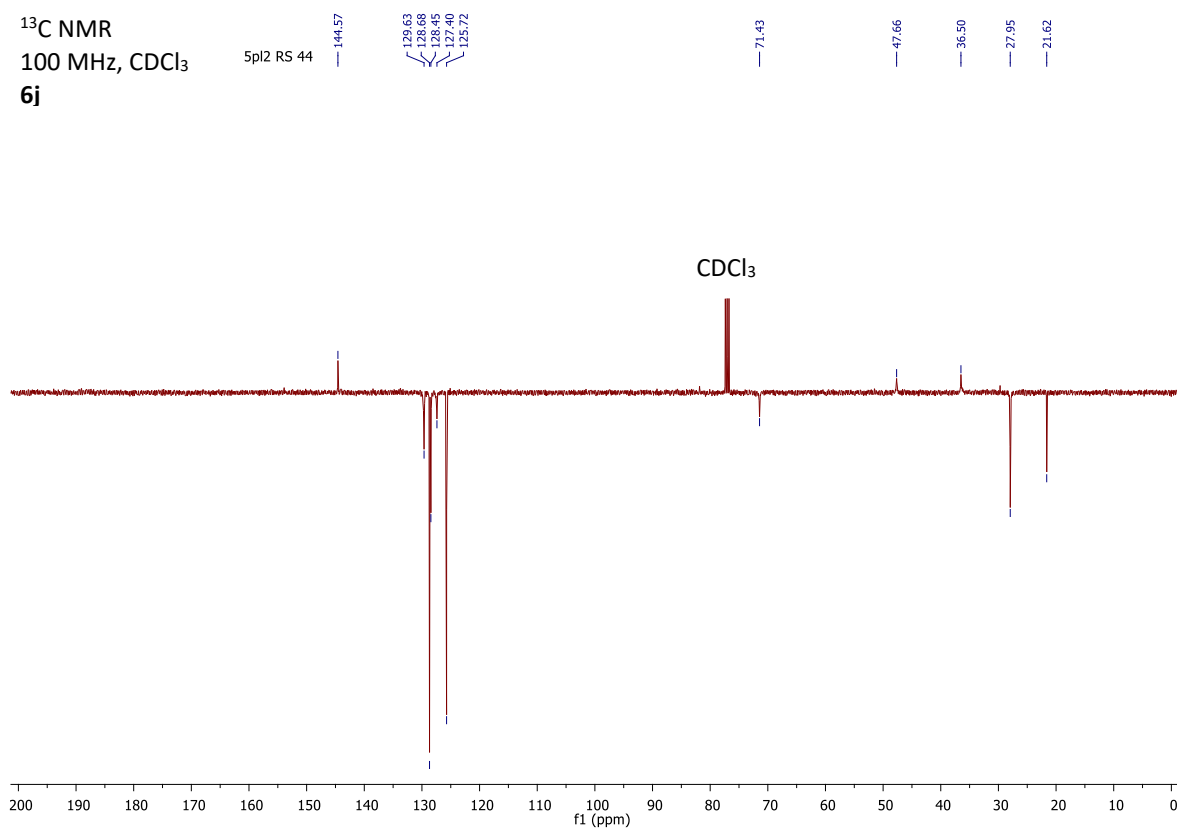

<sup>1</sup>H NMR  
500 MHz, CDCl<sub>3</sub>  
6k

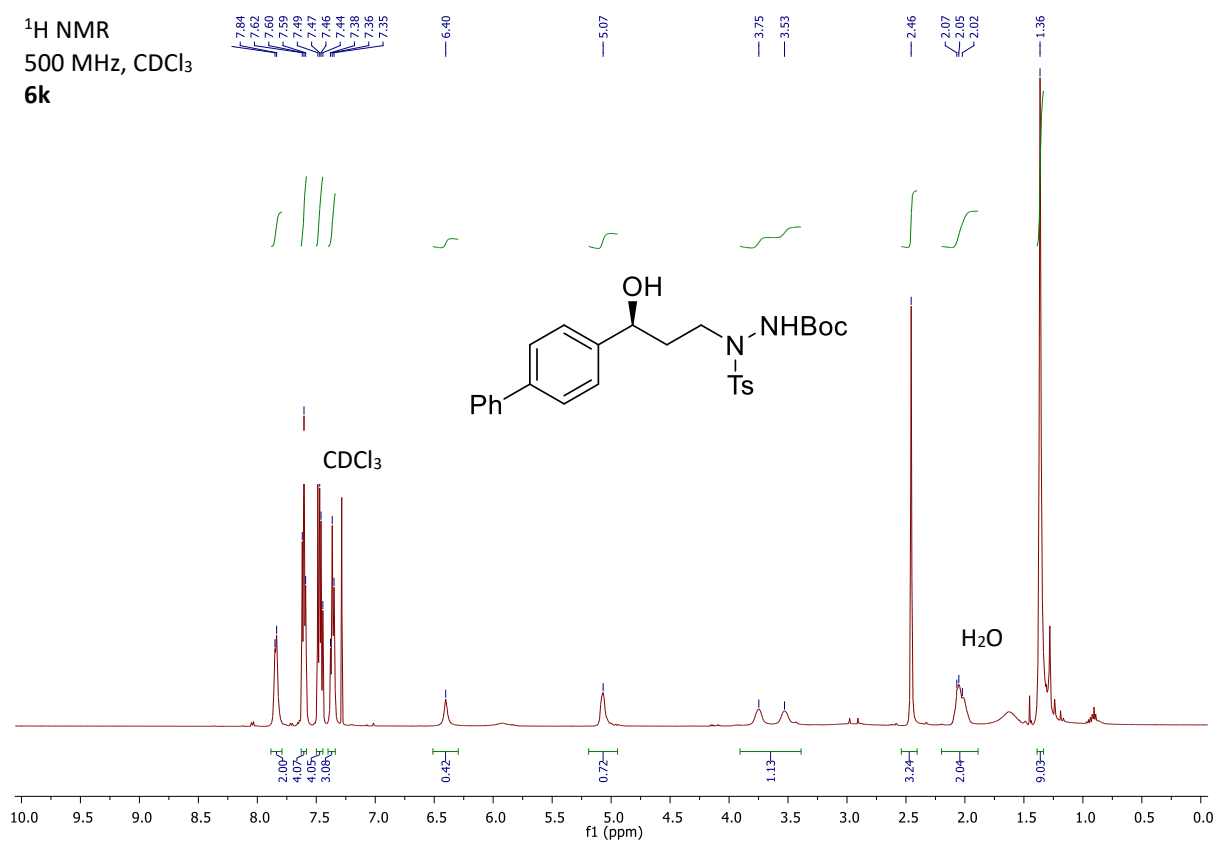

<sup>13</sup>C NMR  
125 MHz, CDCl<sub>3</sub>  
6k

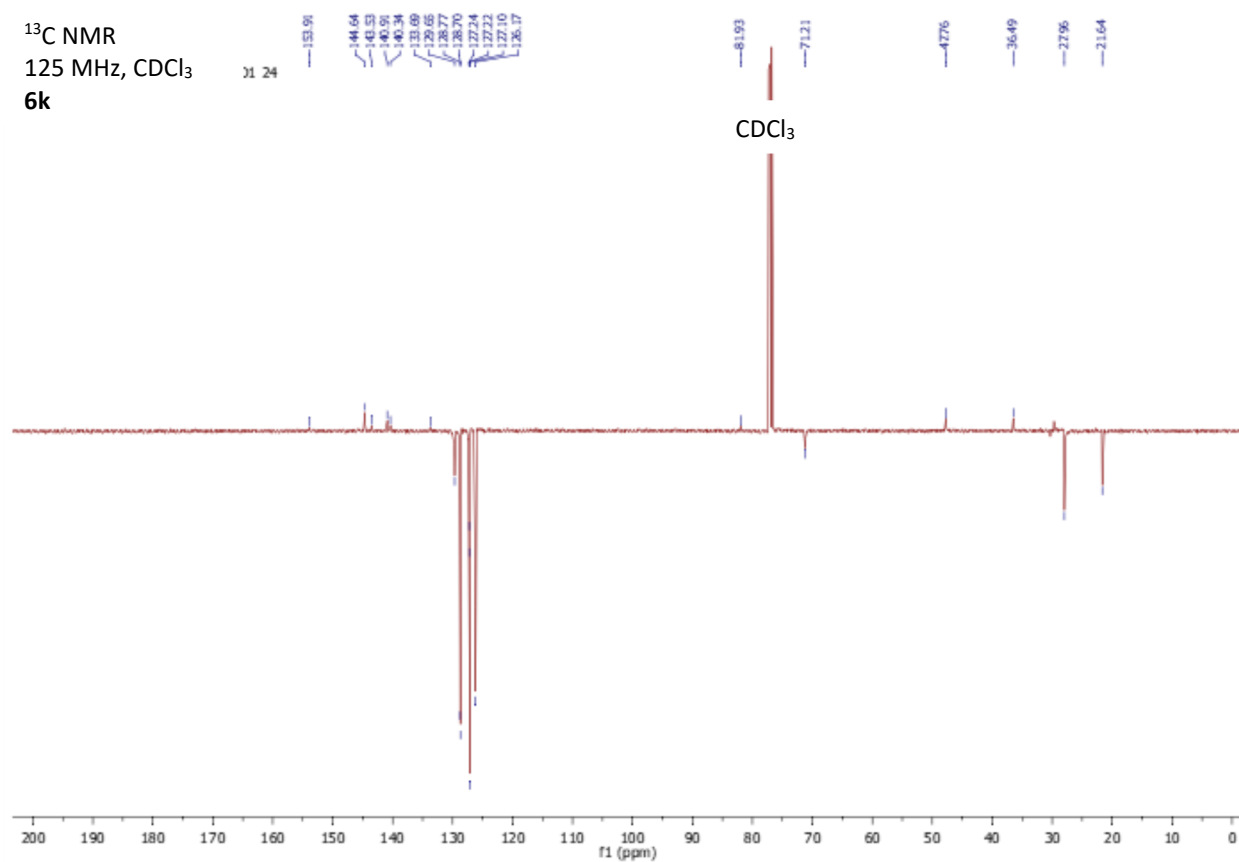



<sup>1</sup>H NMR  
500 MHz, CDCl<sub>3</sub>  
**6l**

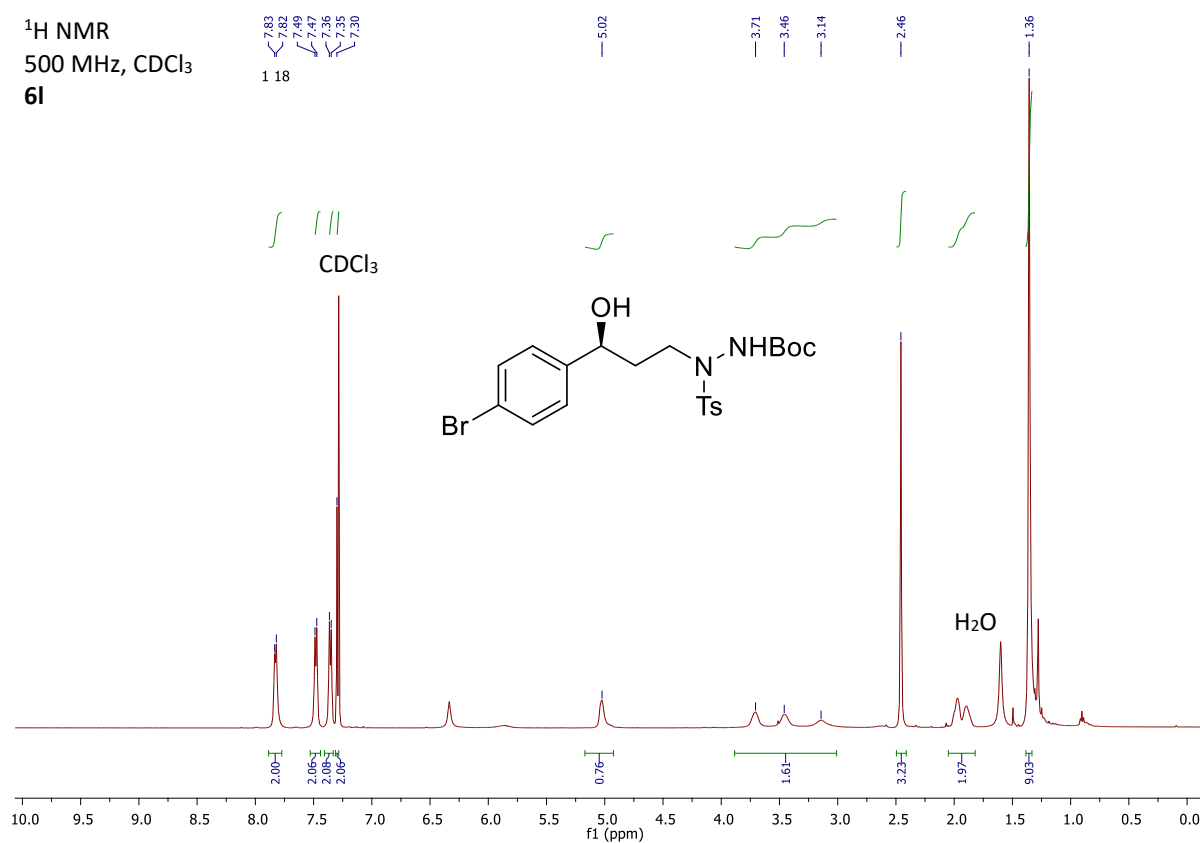

<sup>13</sup>C NMR  
125 MHz, CDCl<sub>3</sub>  
**6l**

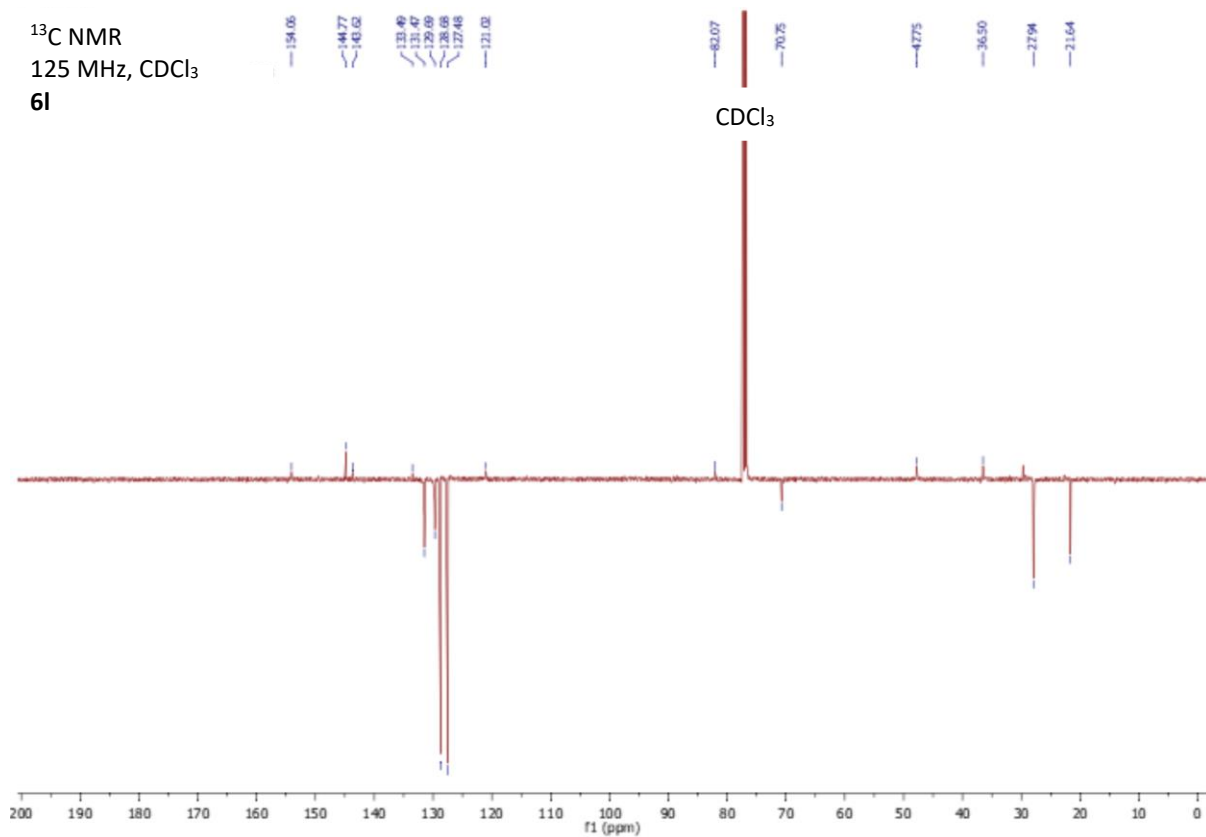

<sup>1</sup>H NMR  
500 MHz, CDCl<sub>3</sub>  
8m

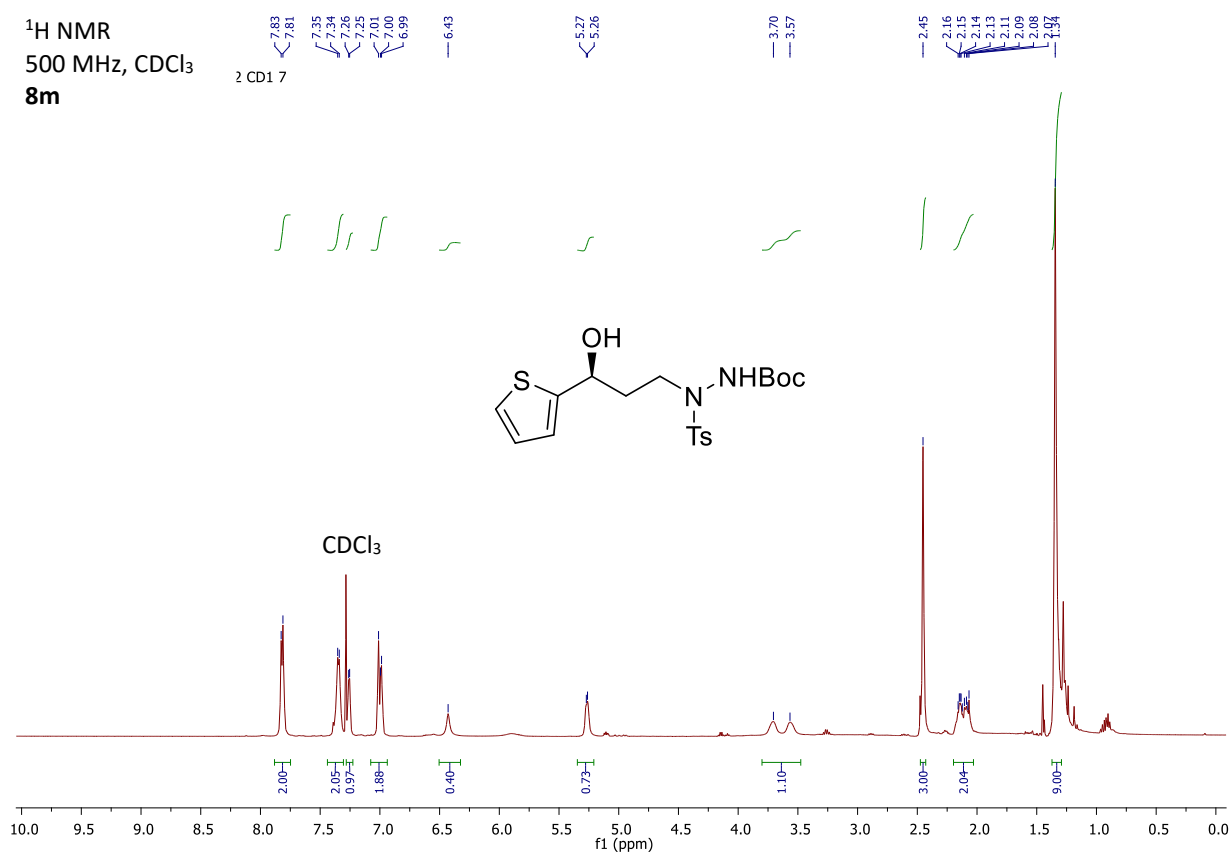

<sup>13</sup>C NMR  
125 MHz, CDCl<sub>3</sub>  
8m

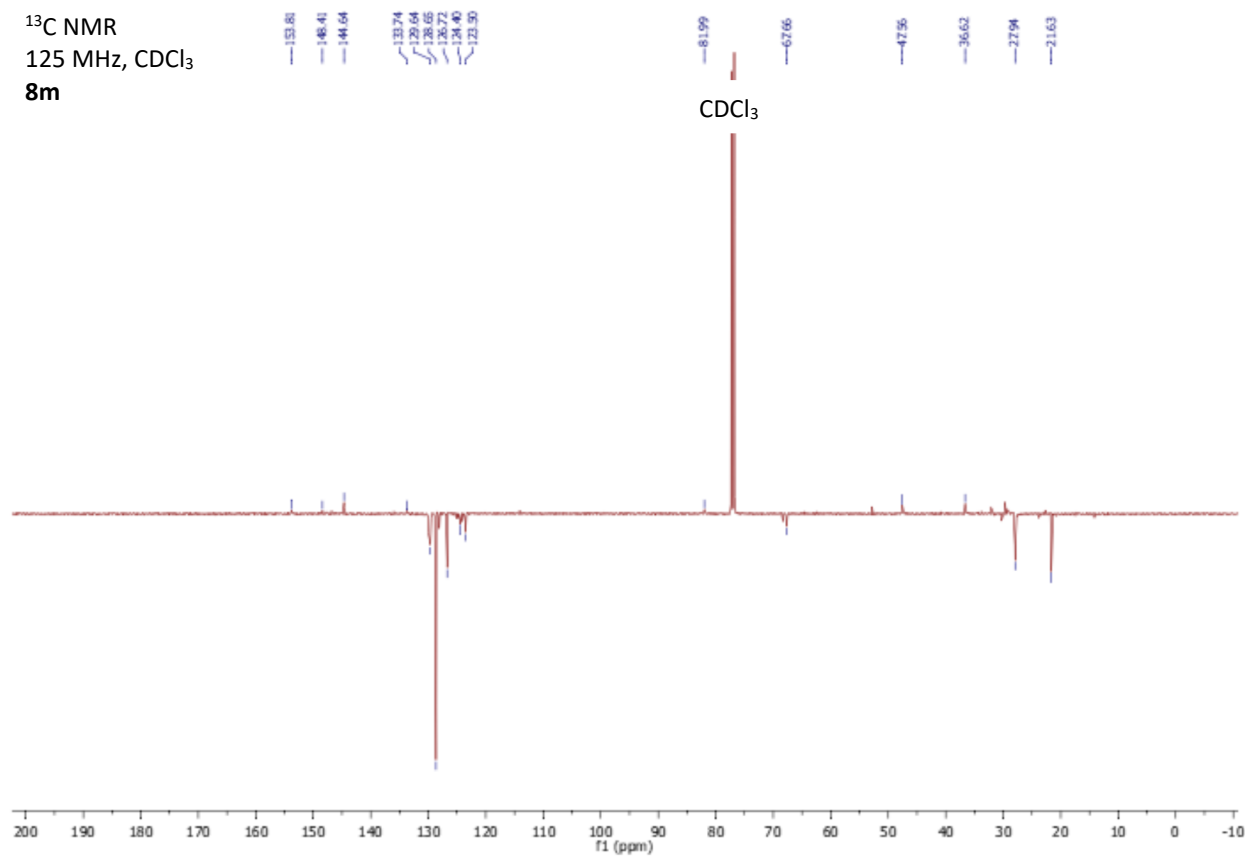

<sup>1</sup>H NMR  
300 MHz, CDCl<sub>3</sub>  
**6n**

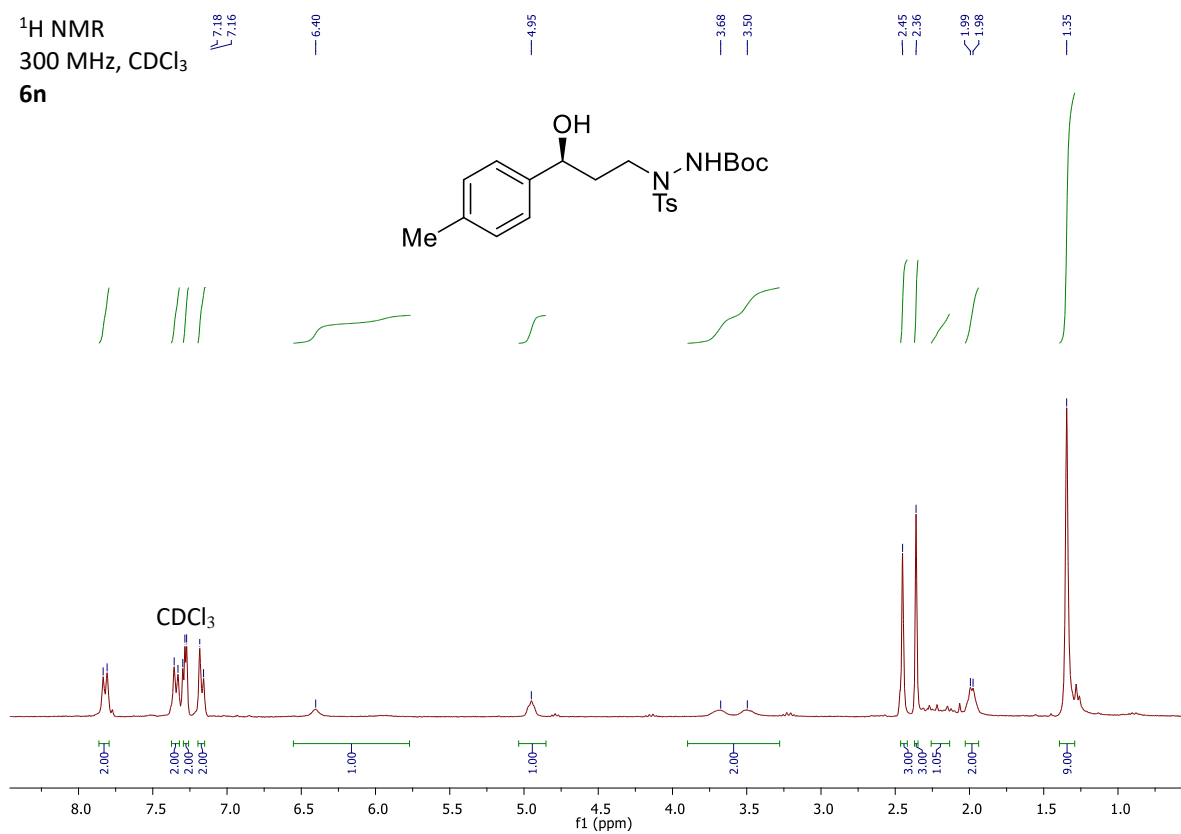

<sup>13</sup>C NMR  
101 MHz, CDCl<sub>3</sub>  
**6n**

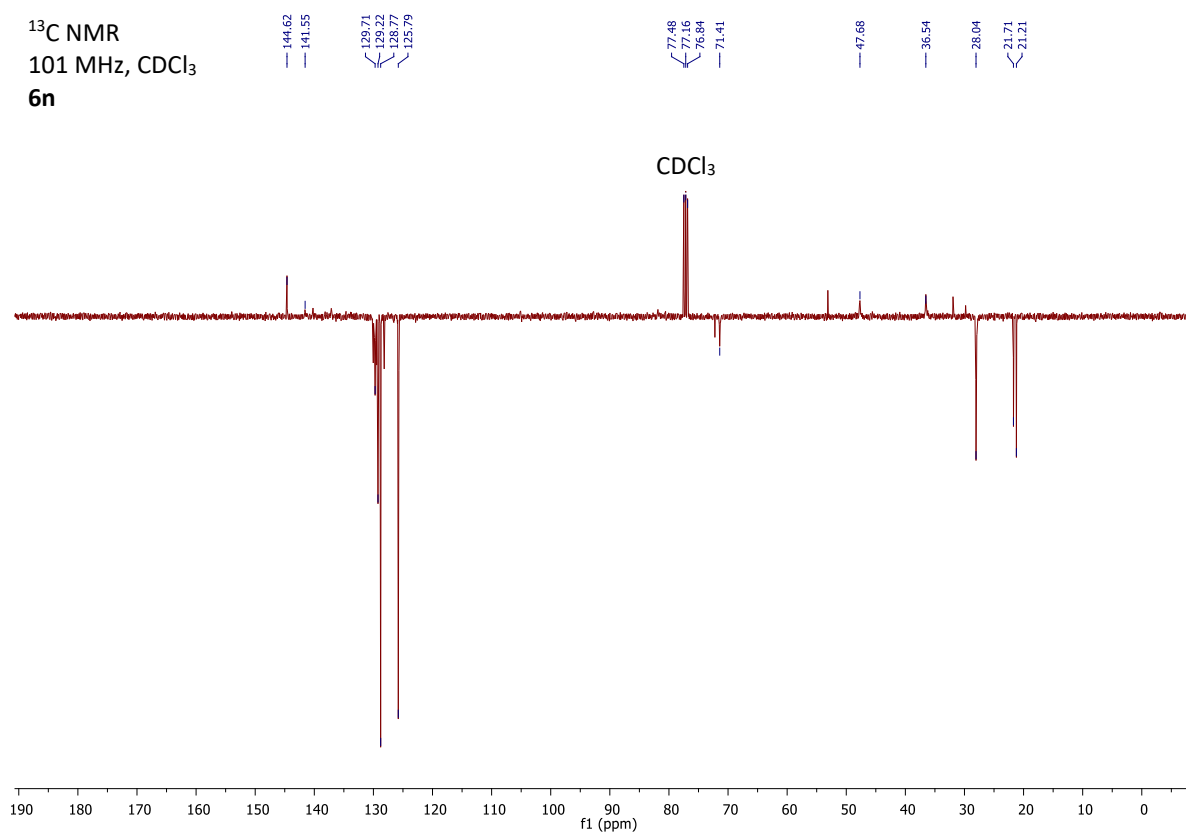

<sup>1</sup>H NMR

300 MHz, CDCl<sub>3</sub>

**6o**

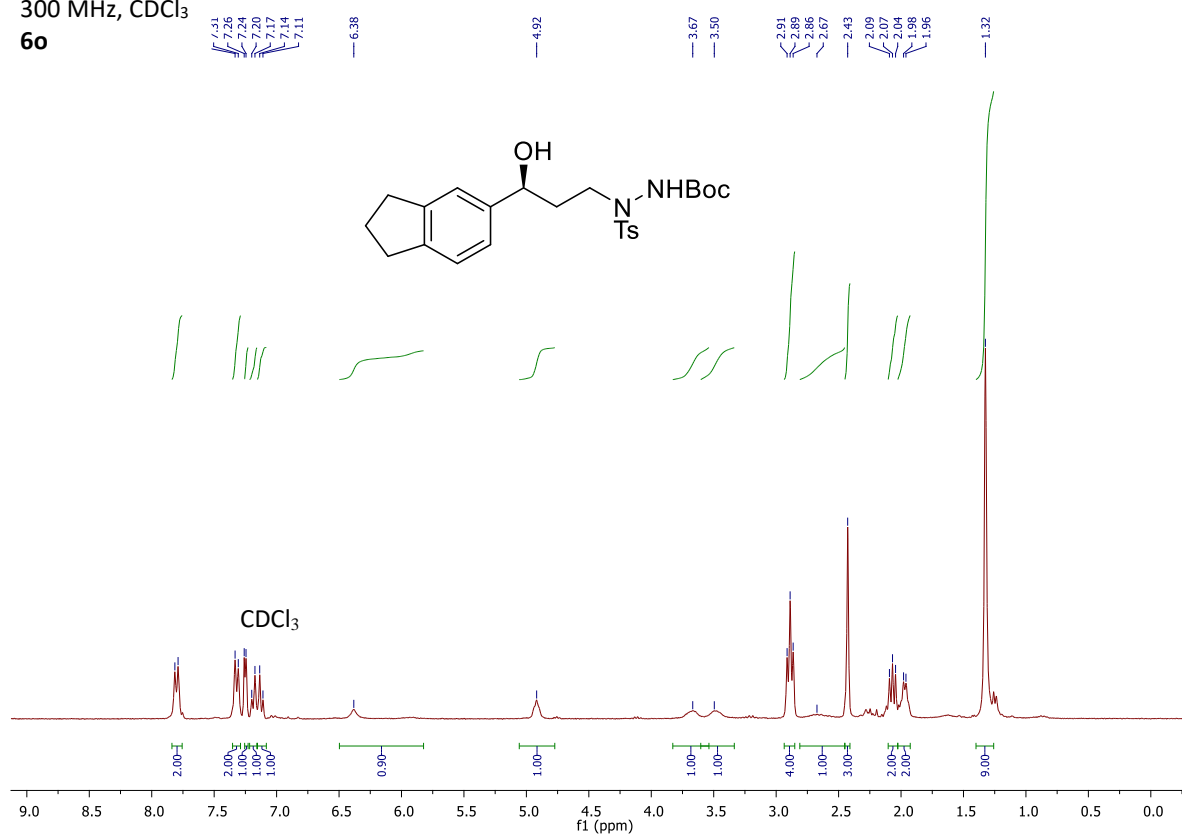

<sup>13</sup>C NMR

101 MHz, CDCl<sub>3</sub>

**6o**

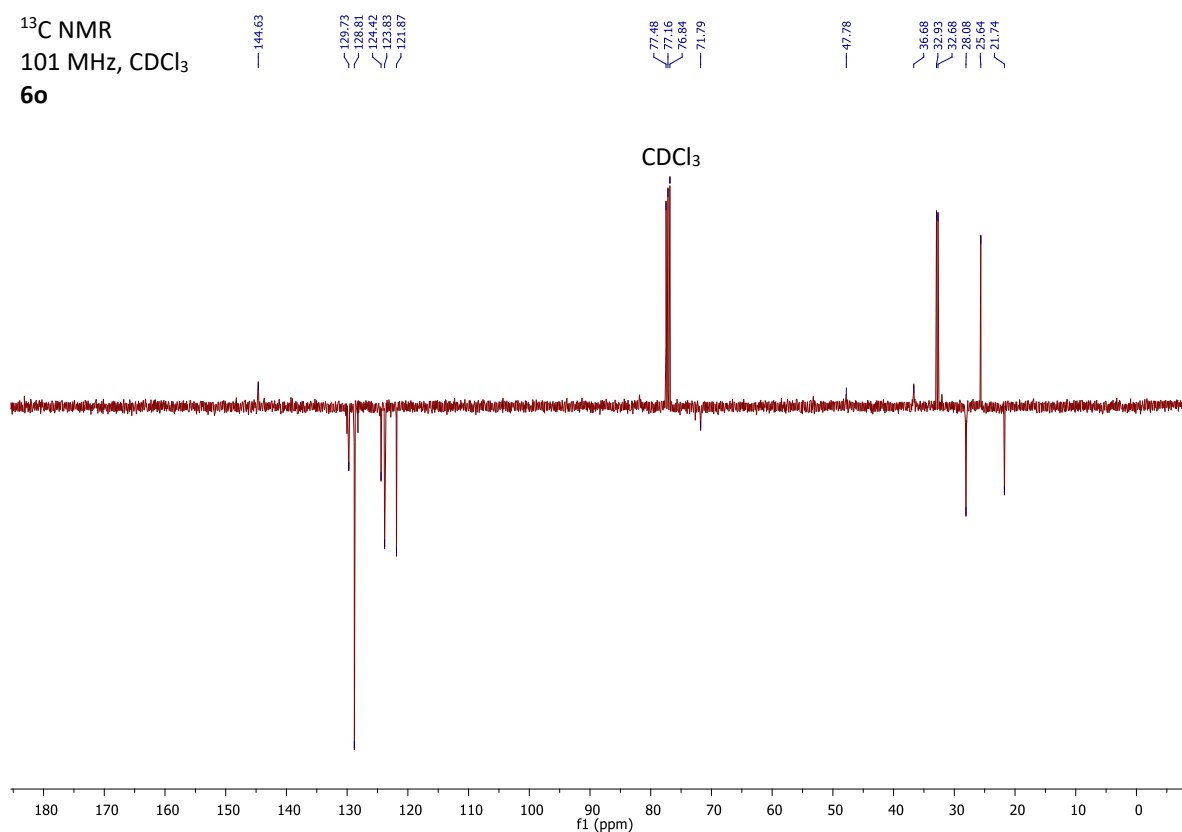

<sup>1</sup>H NMR  
500 MHz, CDCl<sub>3</sub>  
6p

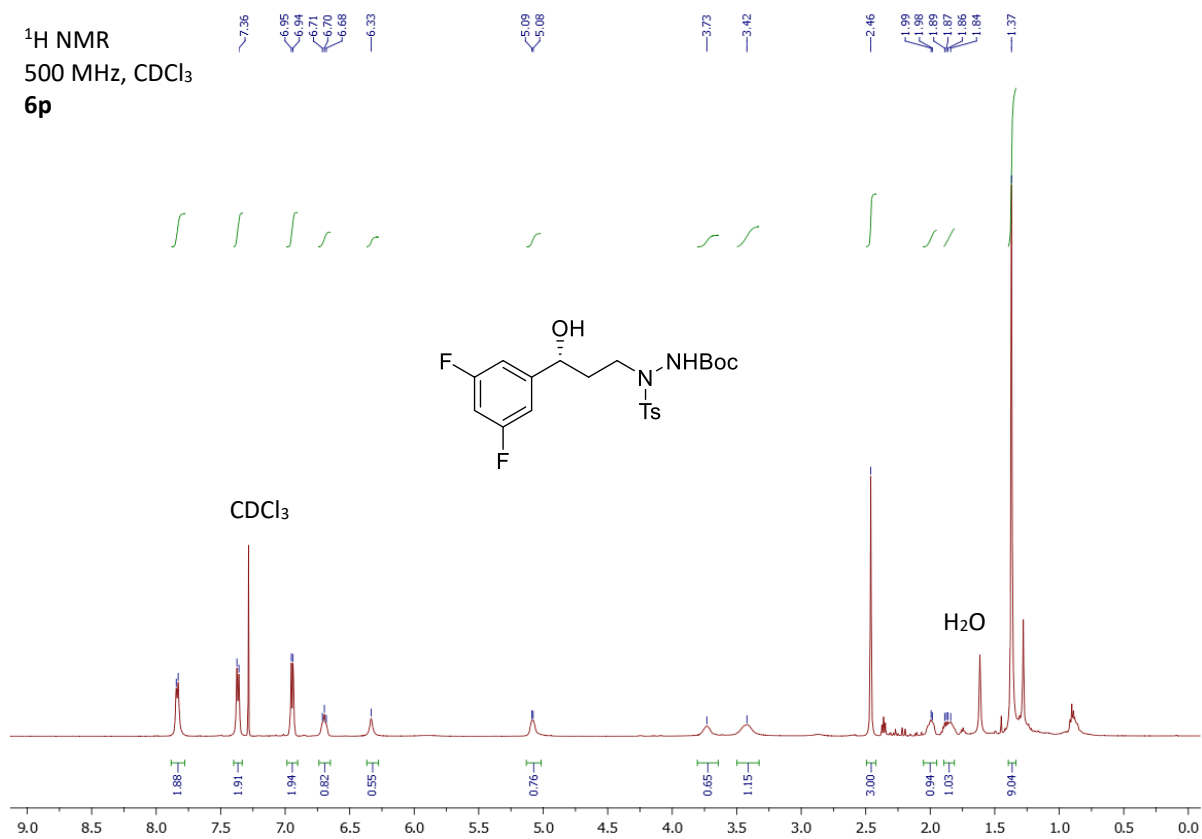

<sup>13</sup>C NMR  
125 MHz, CDCl<sub>3</sub>  
6p

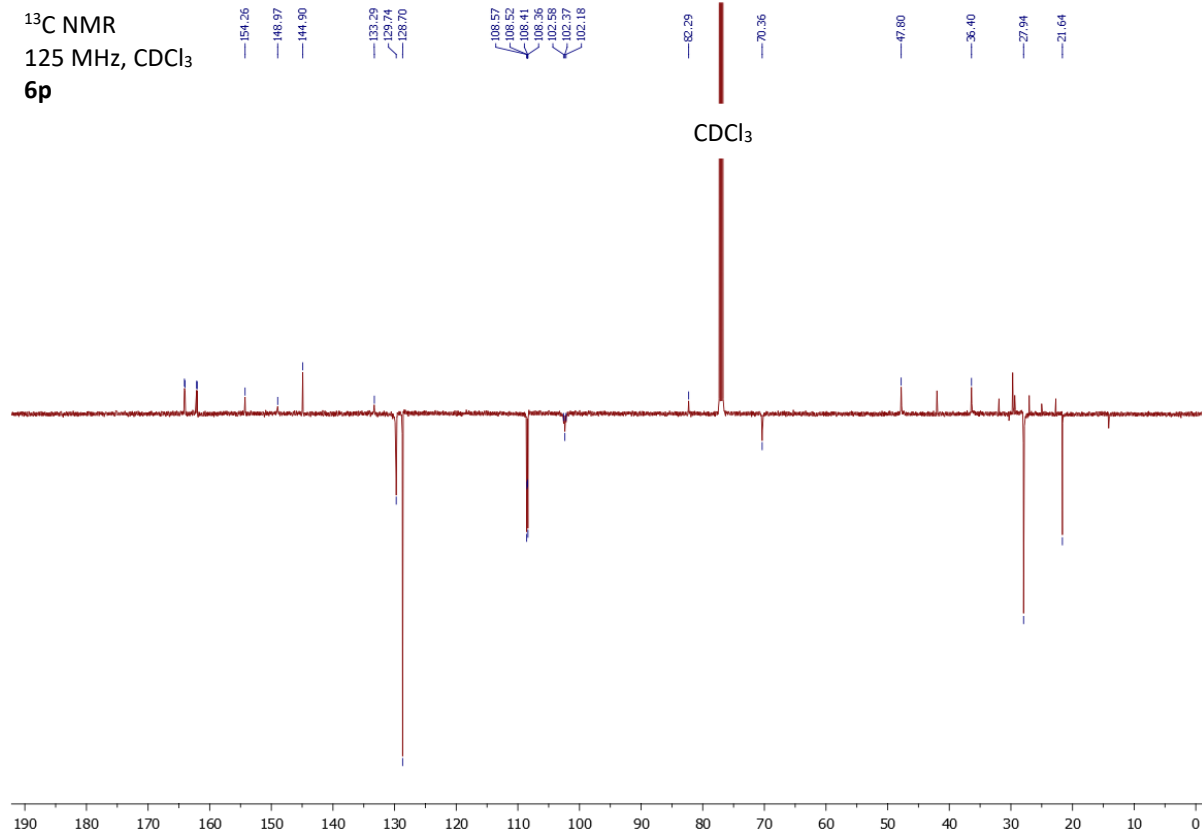

<sup>1</sup>H NMR  
400 MHz, CDCl<sub>3</sub>  
**6q**

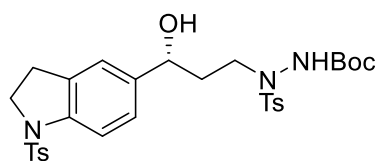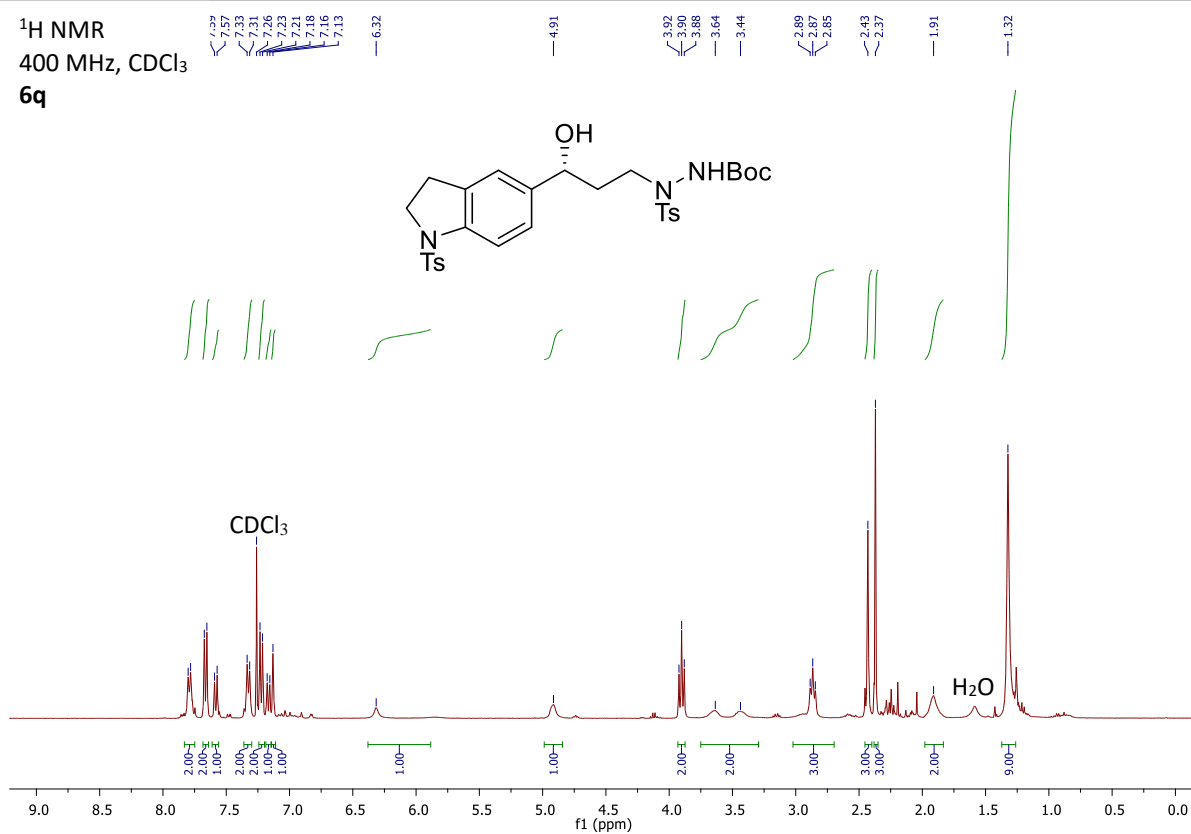

<sup>13</sup>C NMR  
151 MHz, CDCl<sub>3</sub>  
**6q**

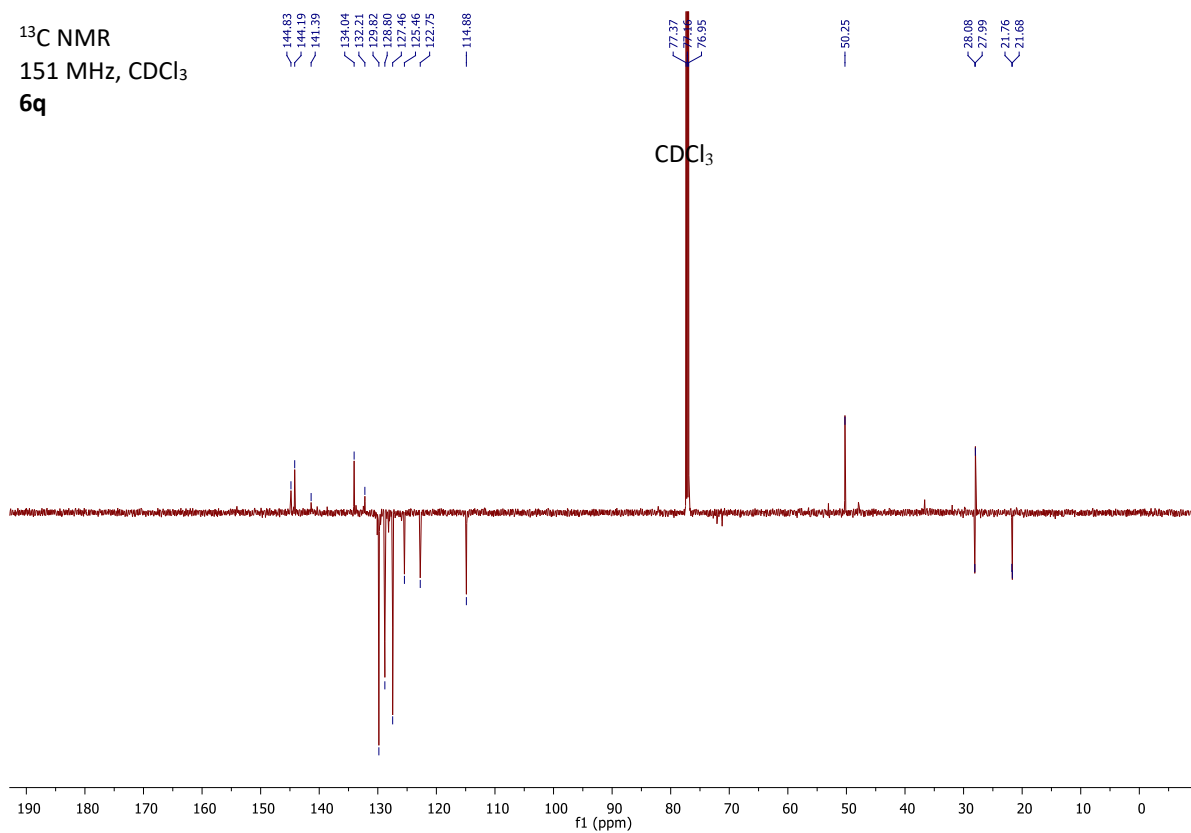

<sup>1</sup>H NMR  
500 MHz, CDCl<sub>3</sub>  
**6r**

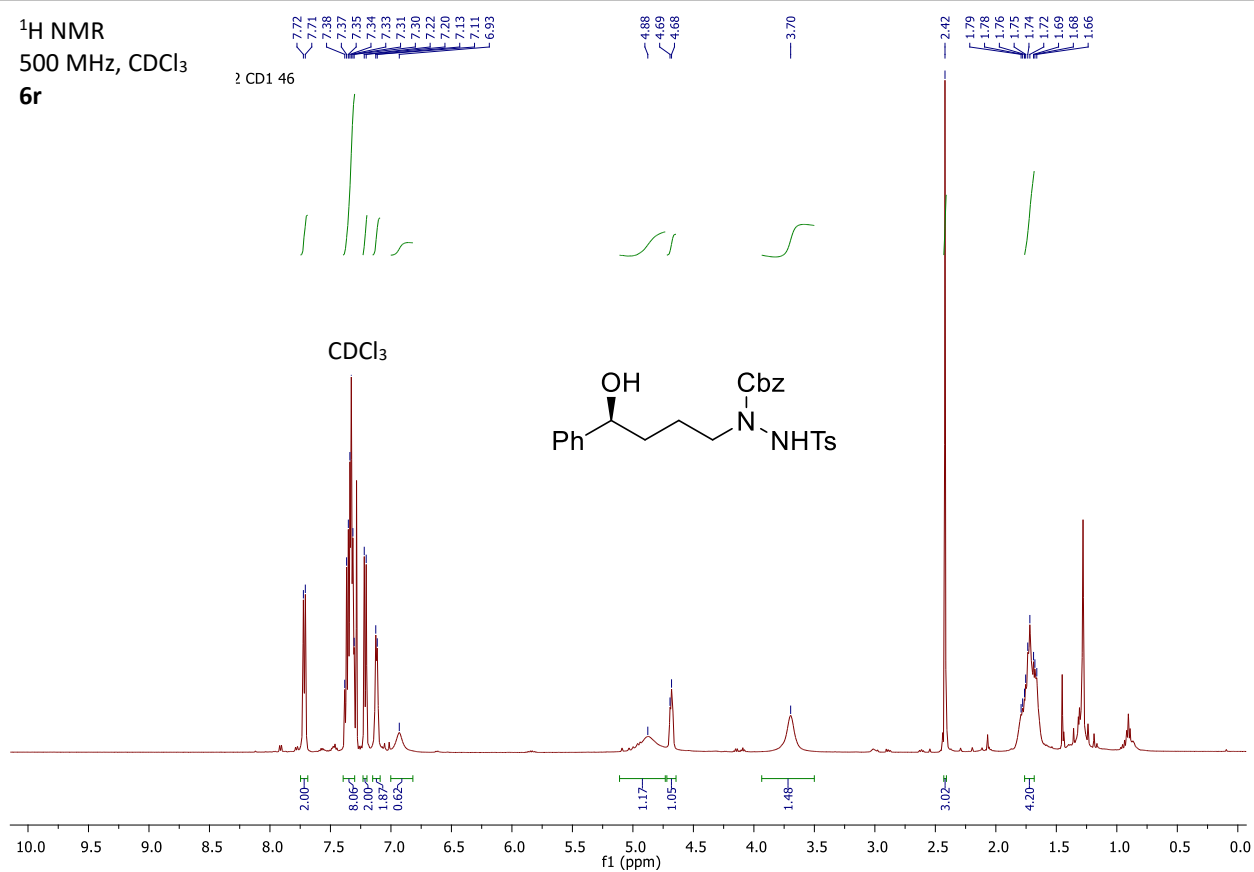

<sup>13</sup>C NMR  
125 MHz, CDCl<sub>3</sub>  
**6r**

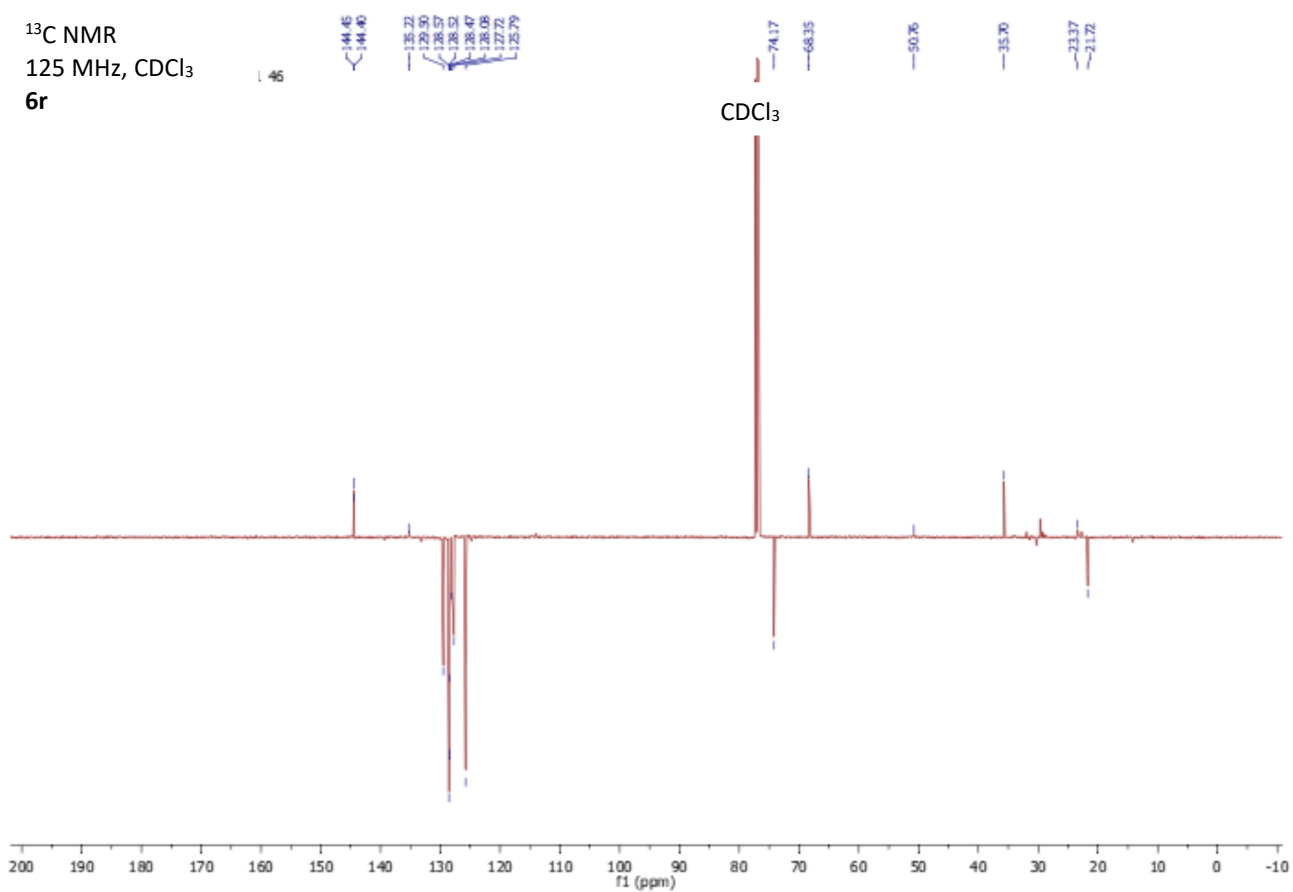

<sup>1</sup>H NMR  
500 MHz, CDCl<sub>3</sub>  
6s

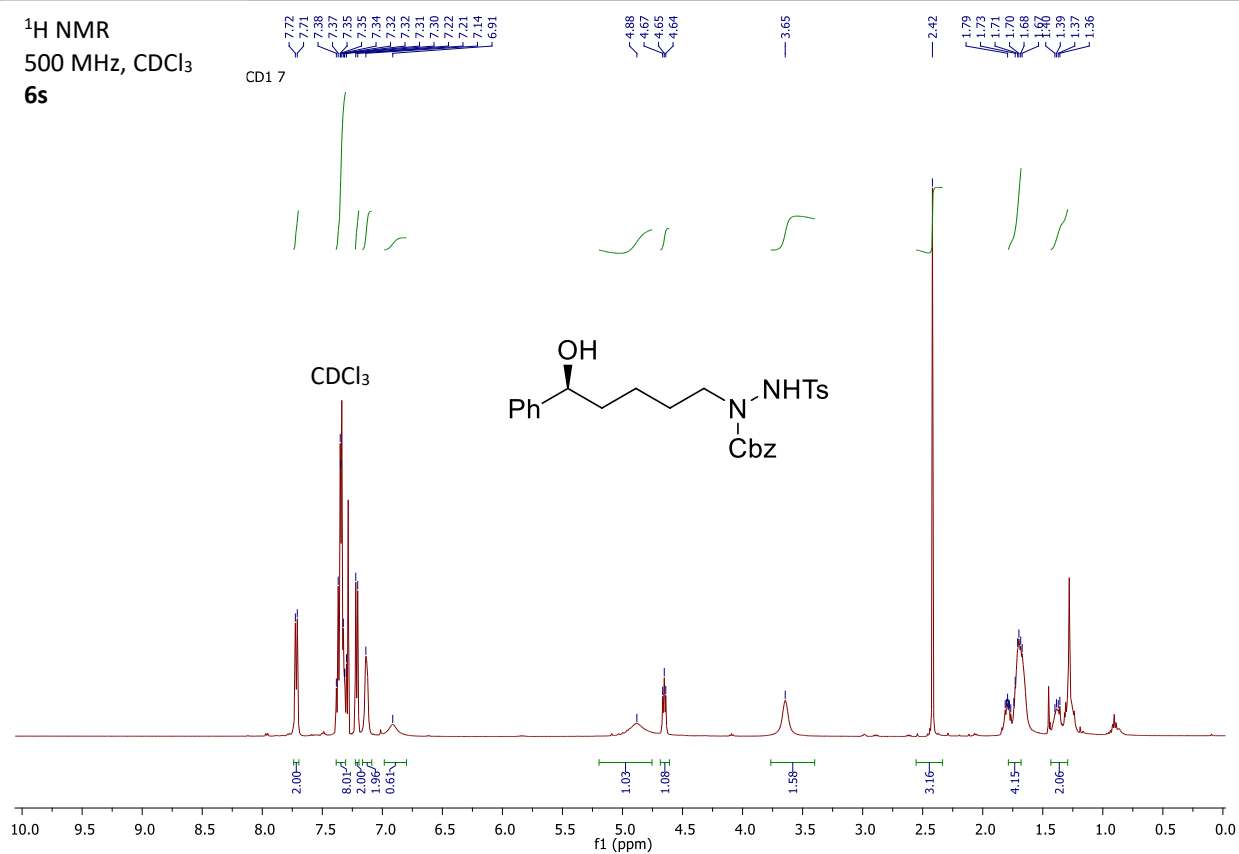

<sup>13</sup>C NMR  
125 MHz, CDCl<sub>3</sub>  
6s

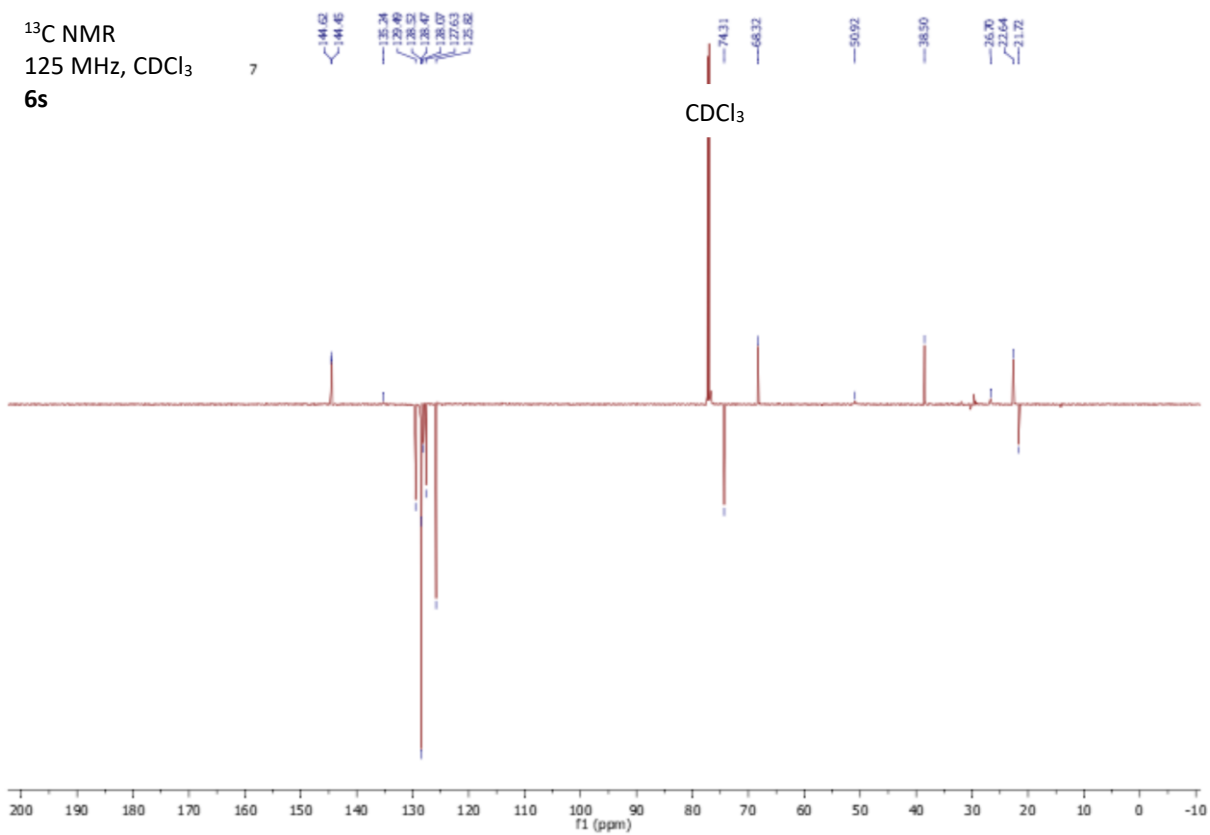



<sup>1</sup>H NMR  
500 MHz, CDCl<sub>3</sub>  
**6t**

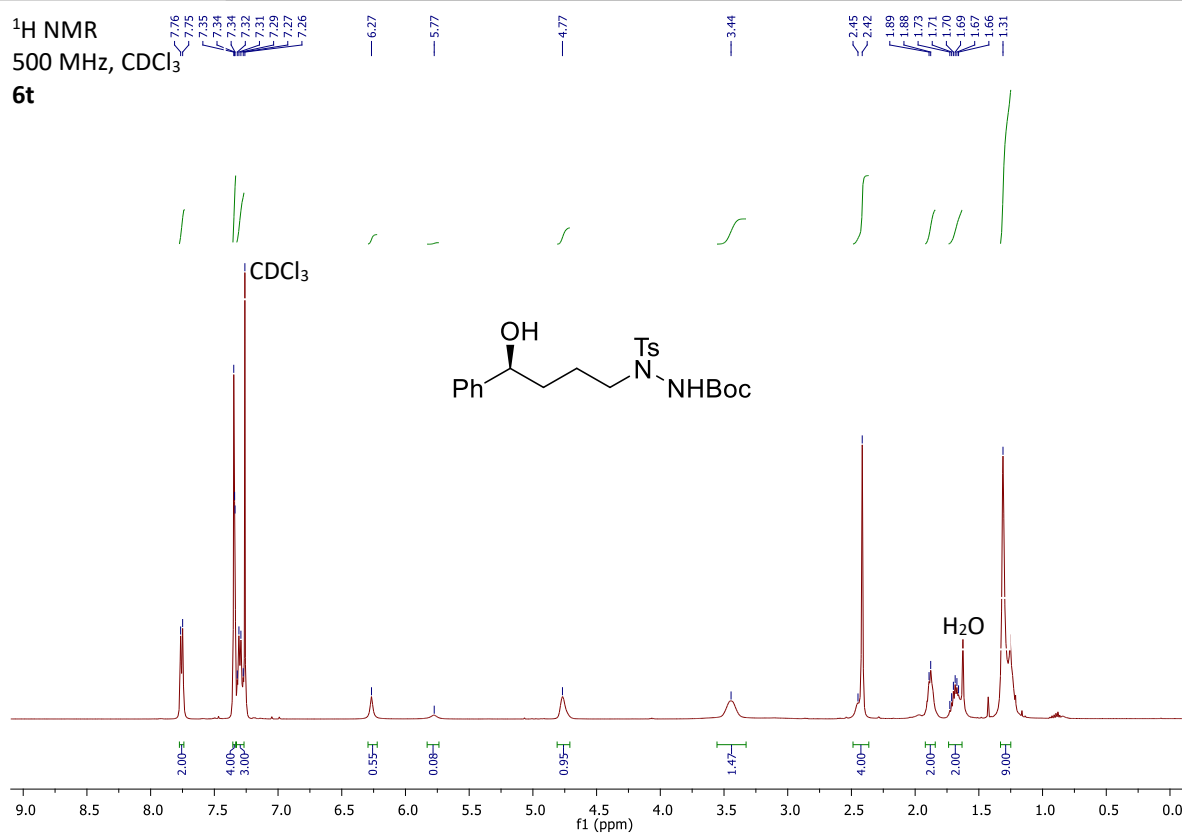

<sup>13</sup>C NMR  
125 MHz, CDCl<sub>3</sub>  
**6t**

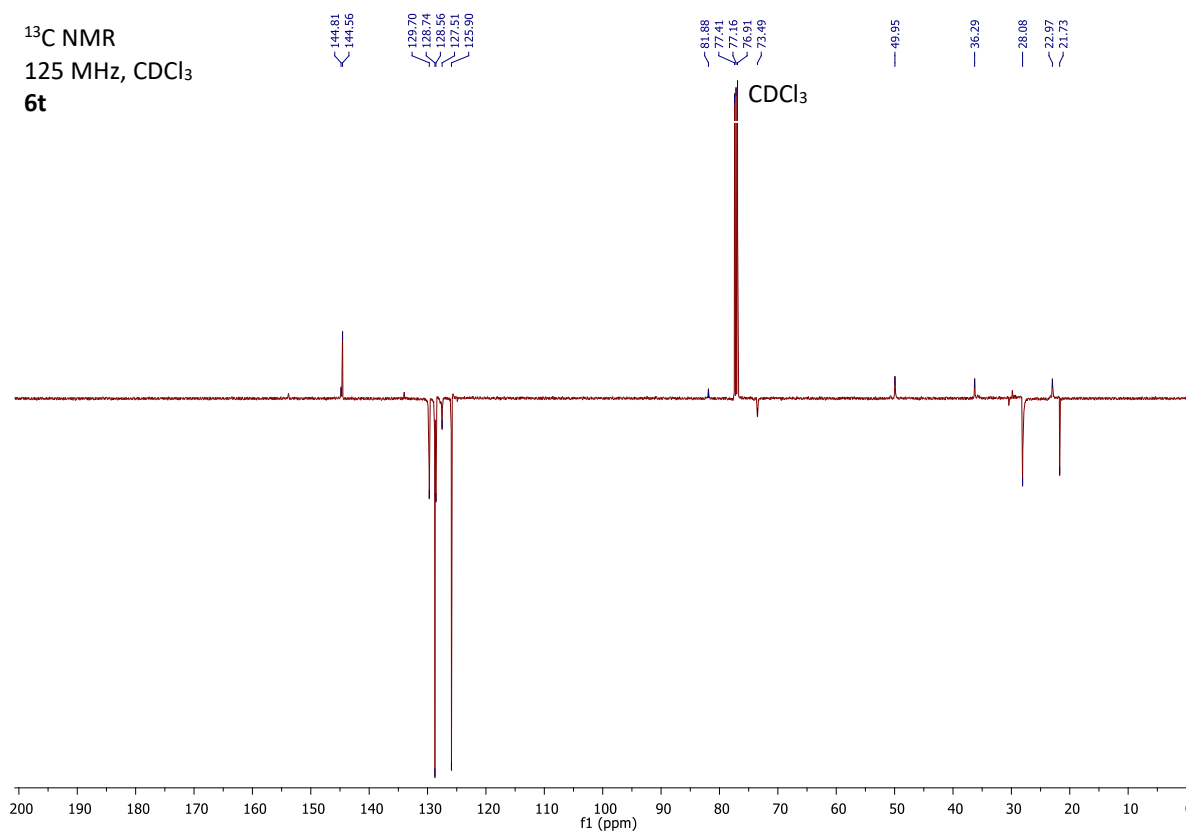

<sup>1</sup>H NMR  
400 MHz, CDCl<sub>3</sub>  
**6u**

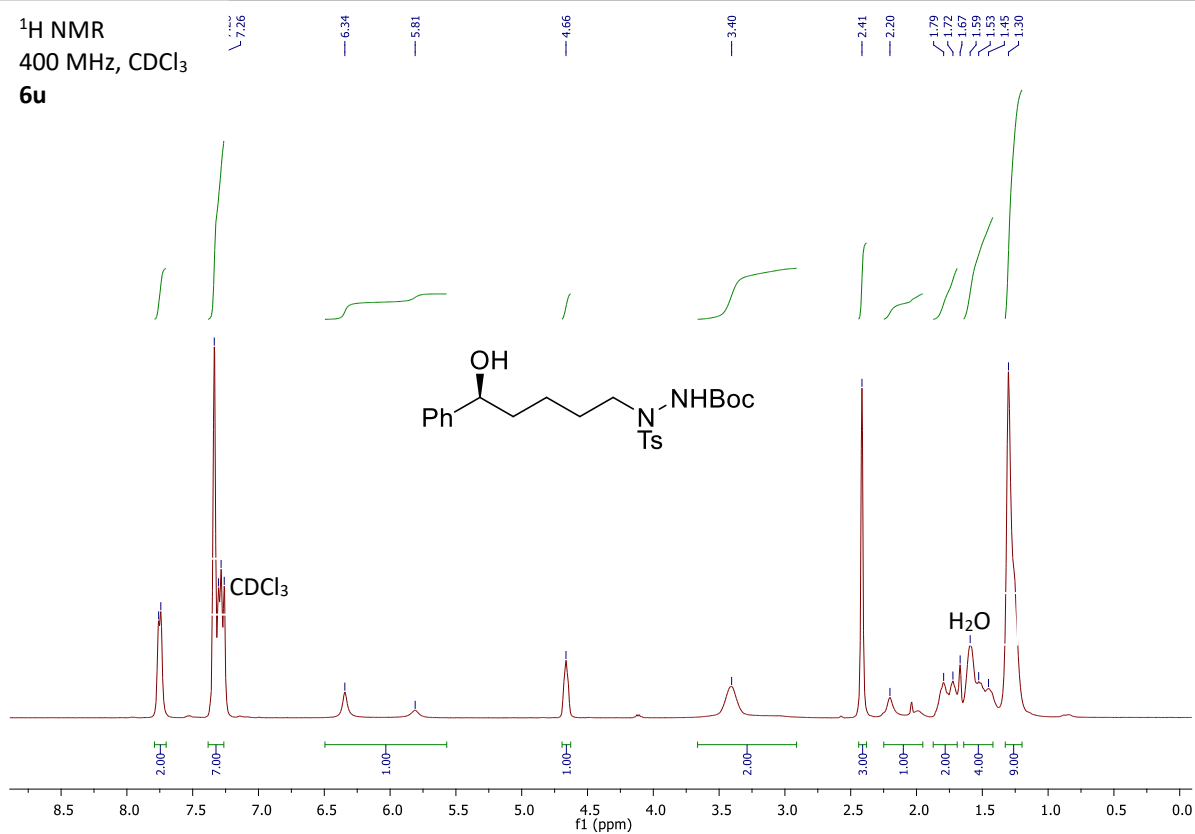

<sup>13</sup>C NMR  
125 MHz, CDCl<sub>3</sub>  
**6u**

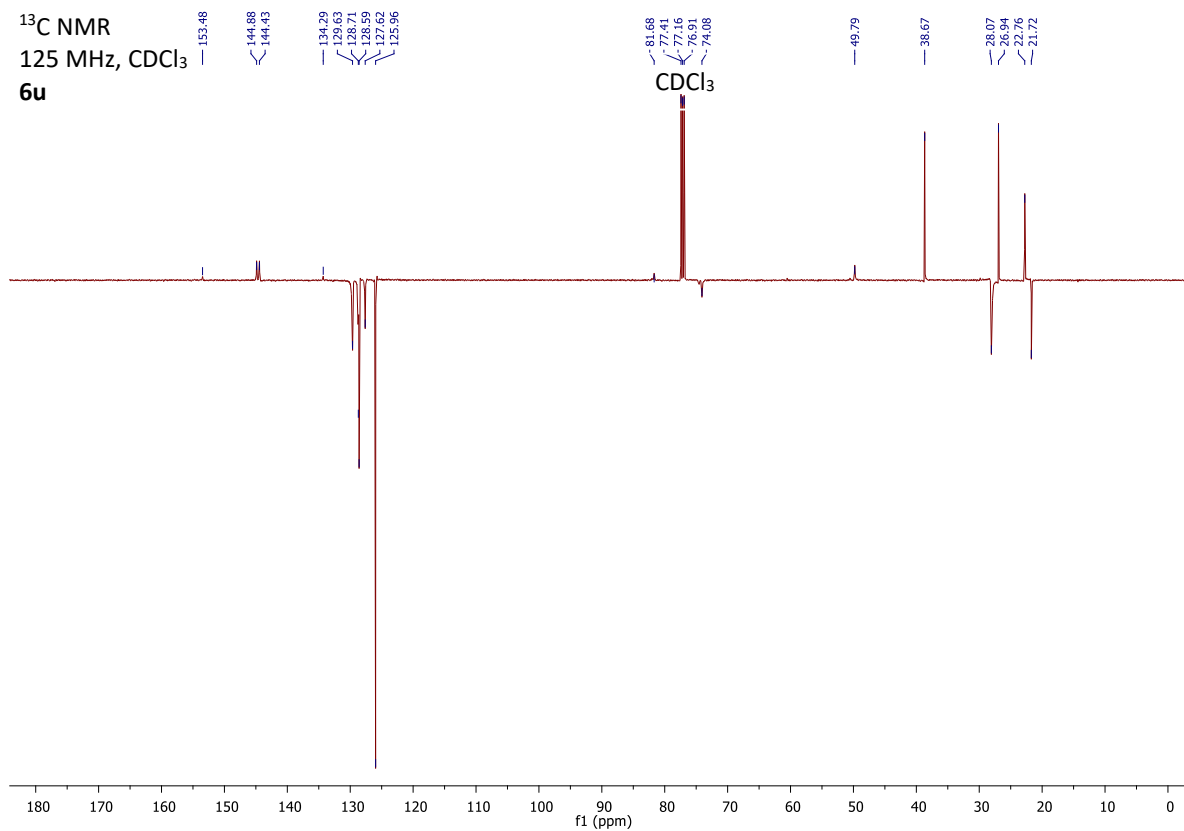

<sup>1</sup>H NMR  
400 MHz, CDCl<sub>3</sub>  
6v

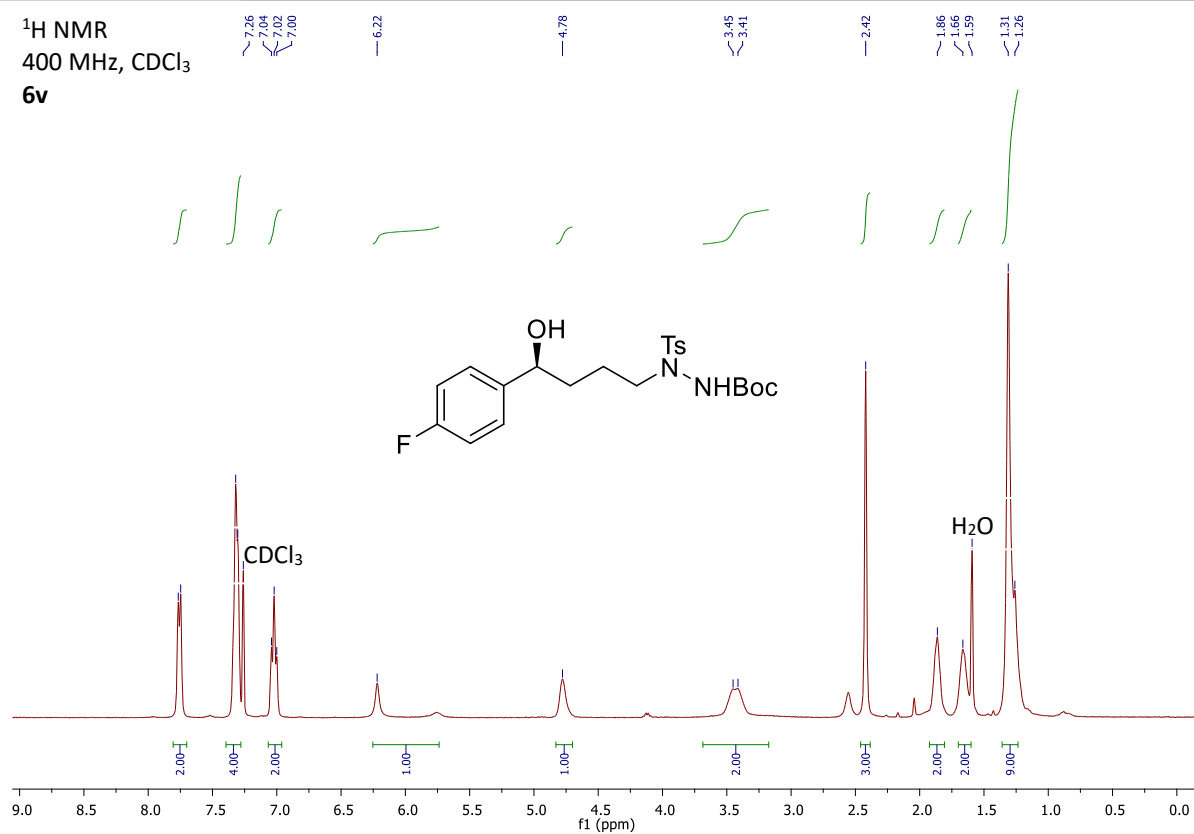

<sup>13</sup>C NMR  
125 MHz, CDCl<sub>3</sub>  
6v

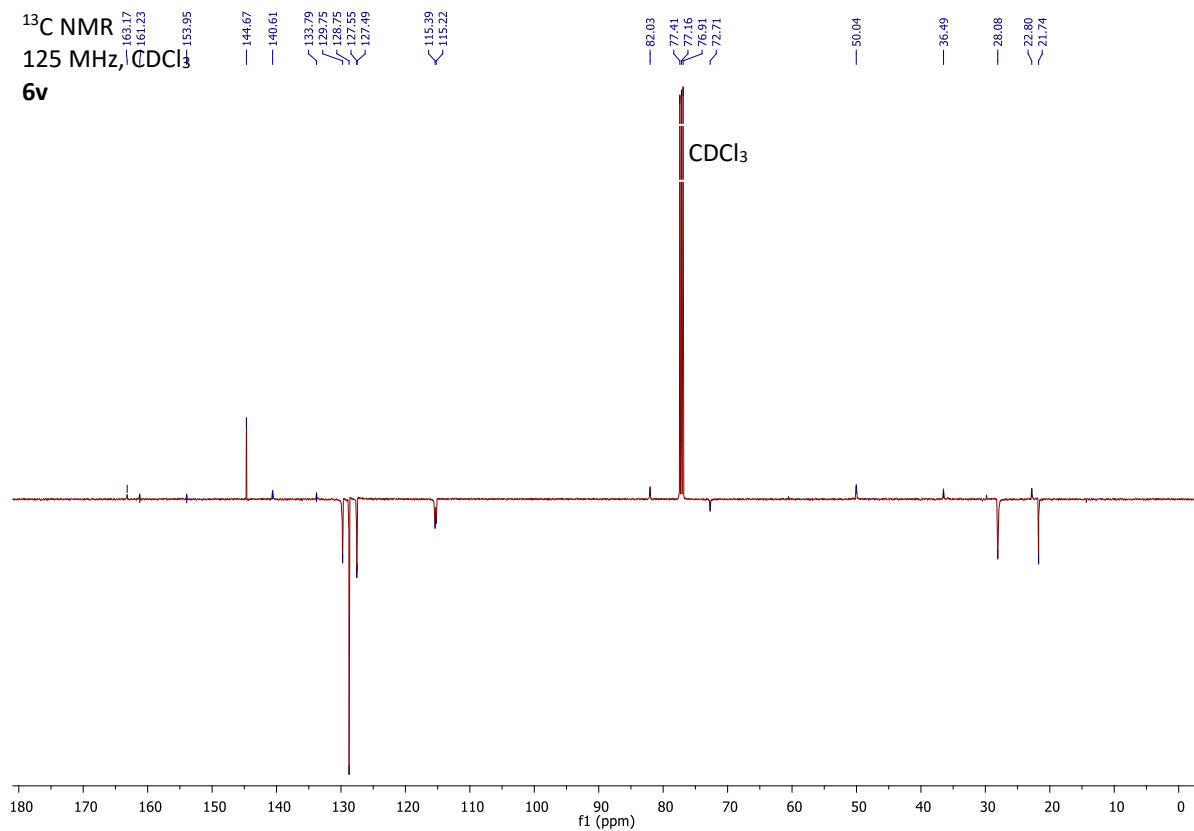

<sup>1</sup>H NMR

500 MHz, CDCl<sub>3</sub>

**8a**

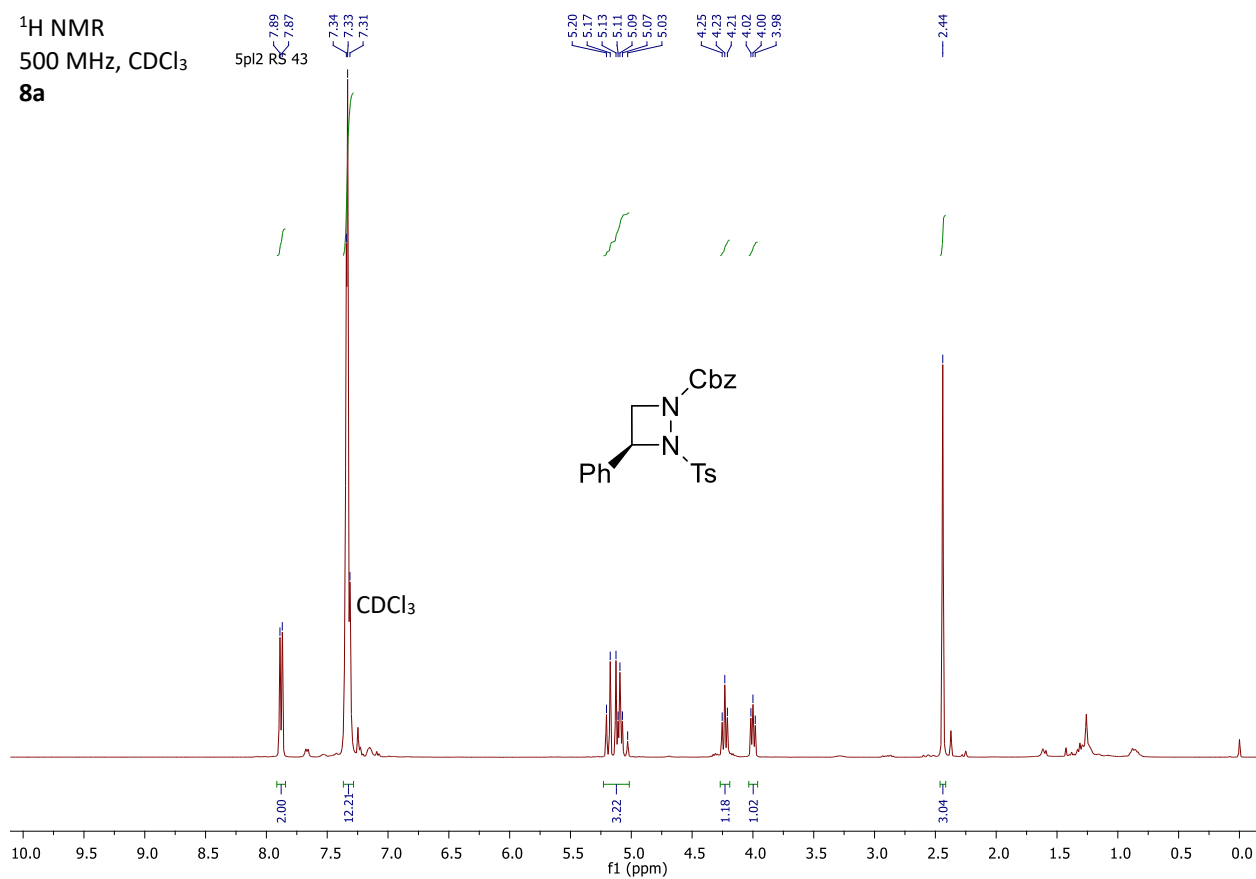

<sup>13</sup>C NMR

125 MHz, CDCl<sub>3</sub>

**8a**

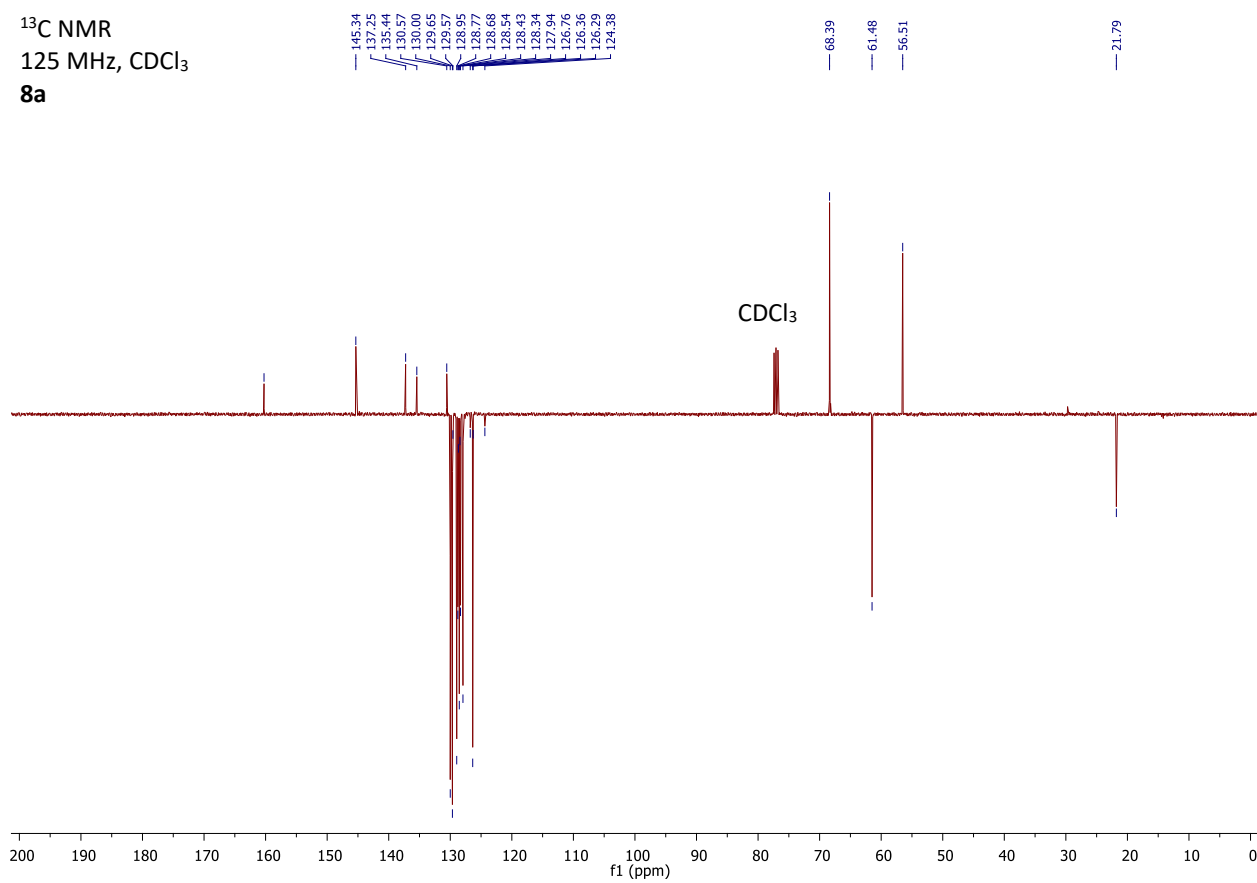

<sup>1</sup>H NMR  
500 MHz, CDCl<sub>3</sub>  
**8b**

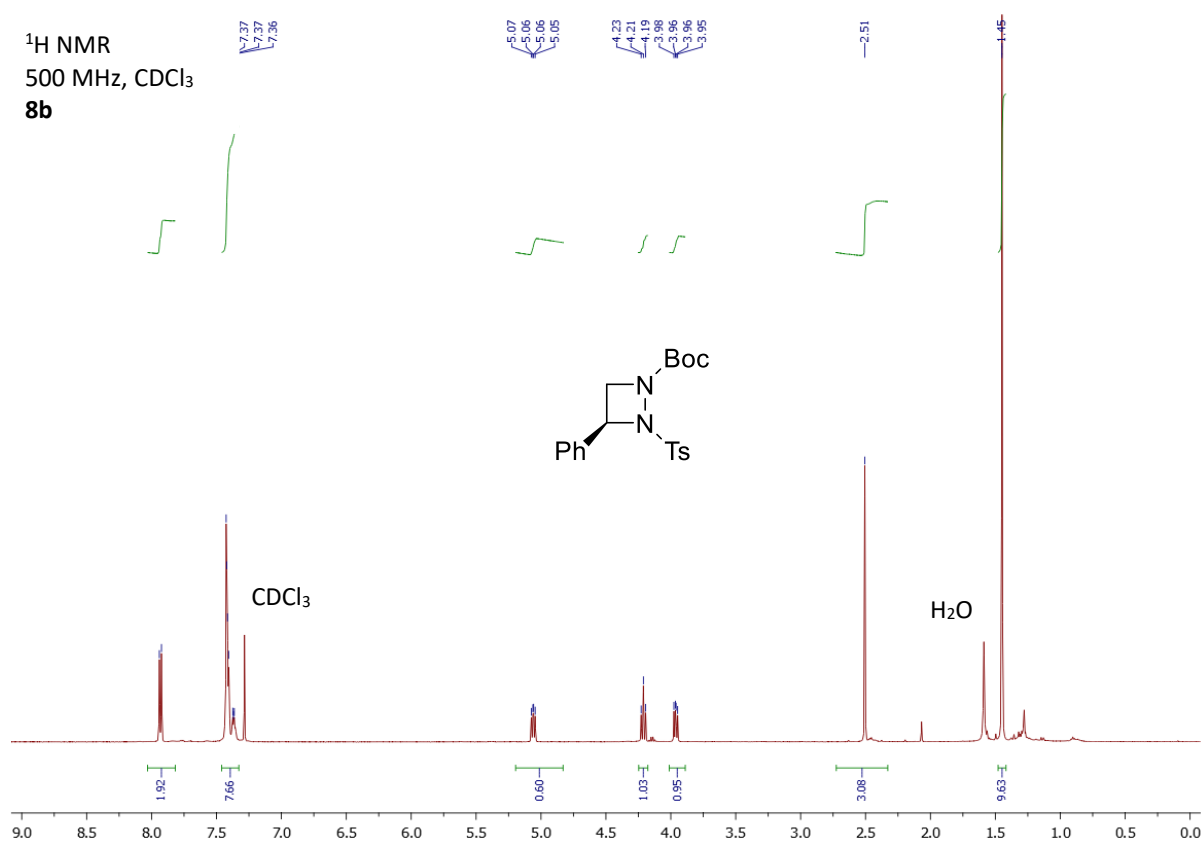

<sup>13</sup>C NMR  
125 MHz, CDCl<sub>3</sub>  
**8b**

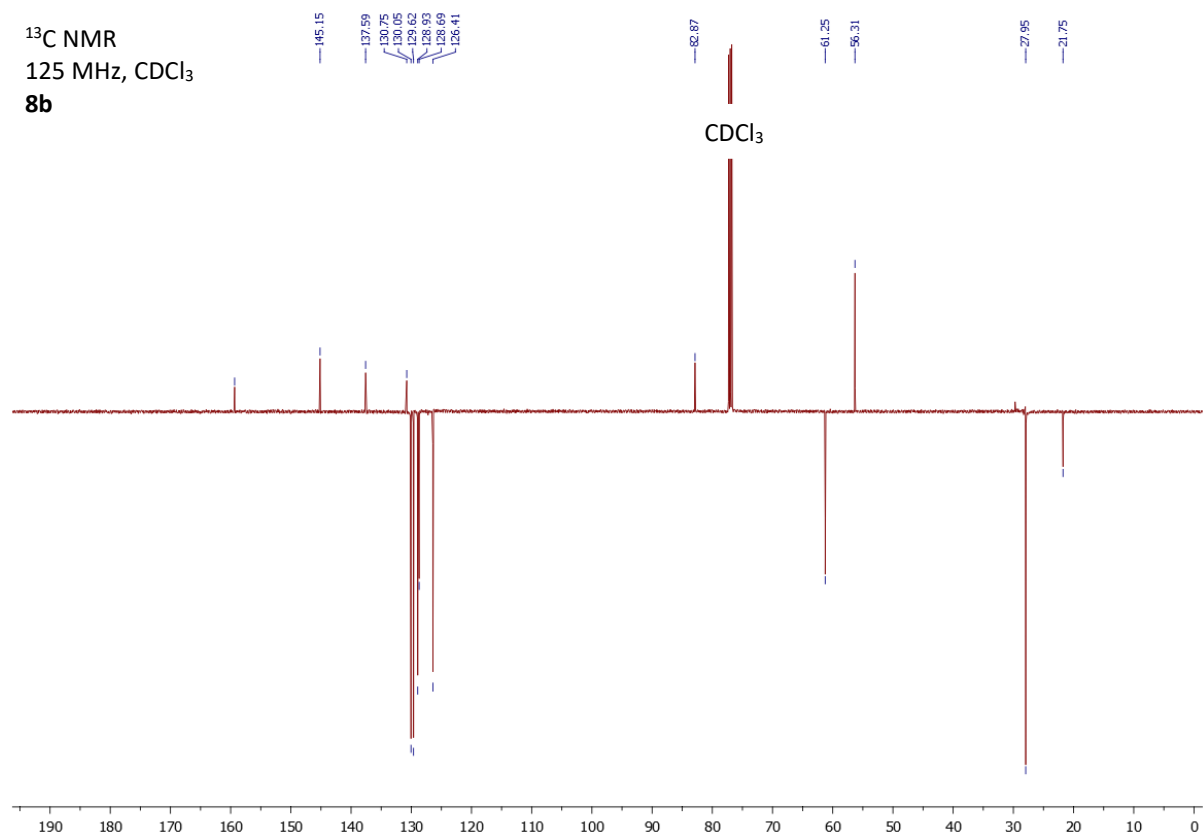

<sup>1</sup>H NMR  
500 MHz, CDCl<sub>3</sub>  
**8c**

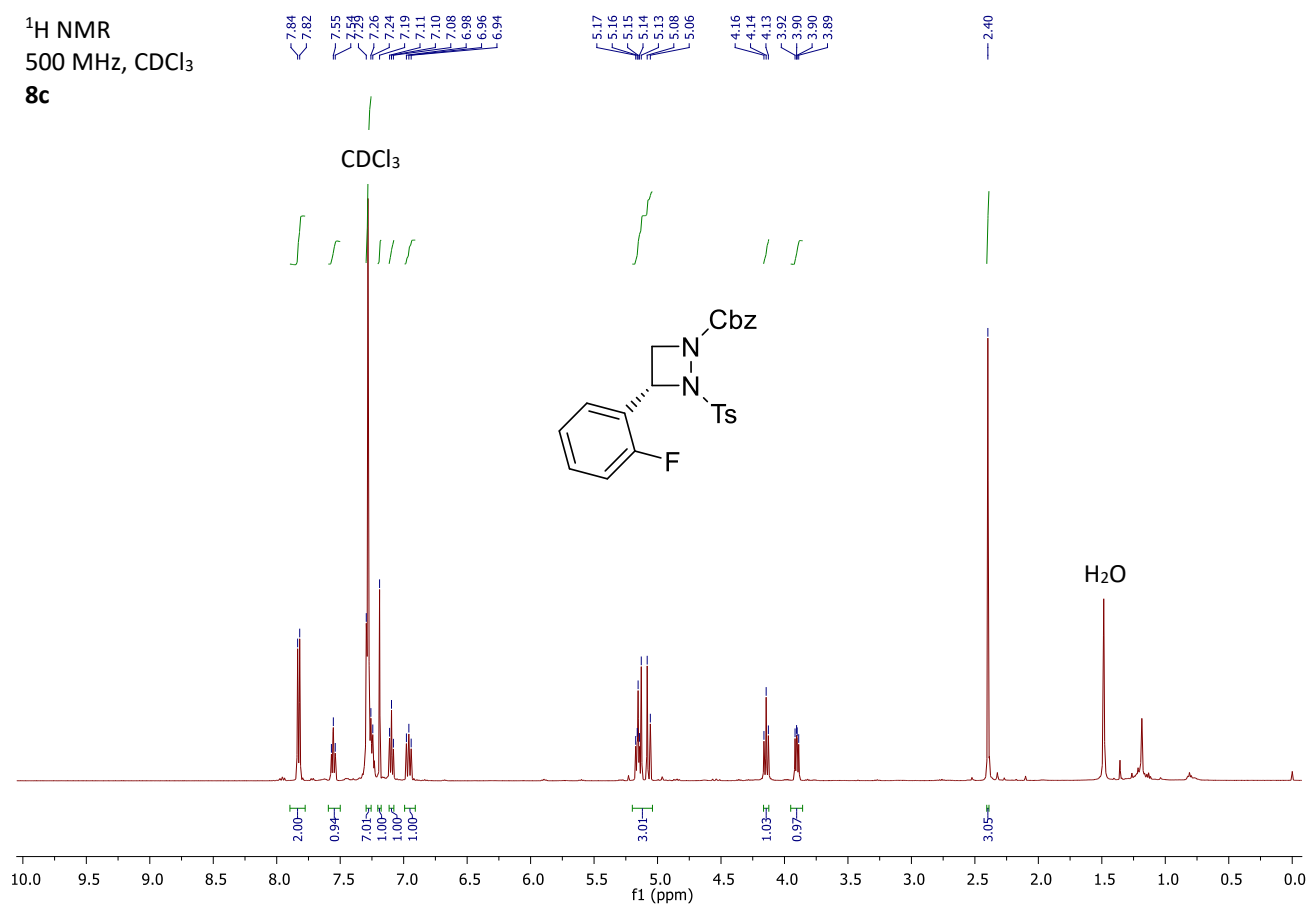

<sup>13</sup>C NMR  
125 MHz, CDCl<sub>3</sub>  
**8c**

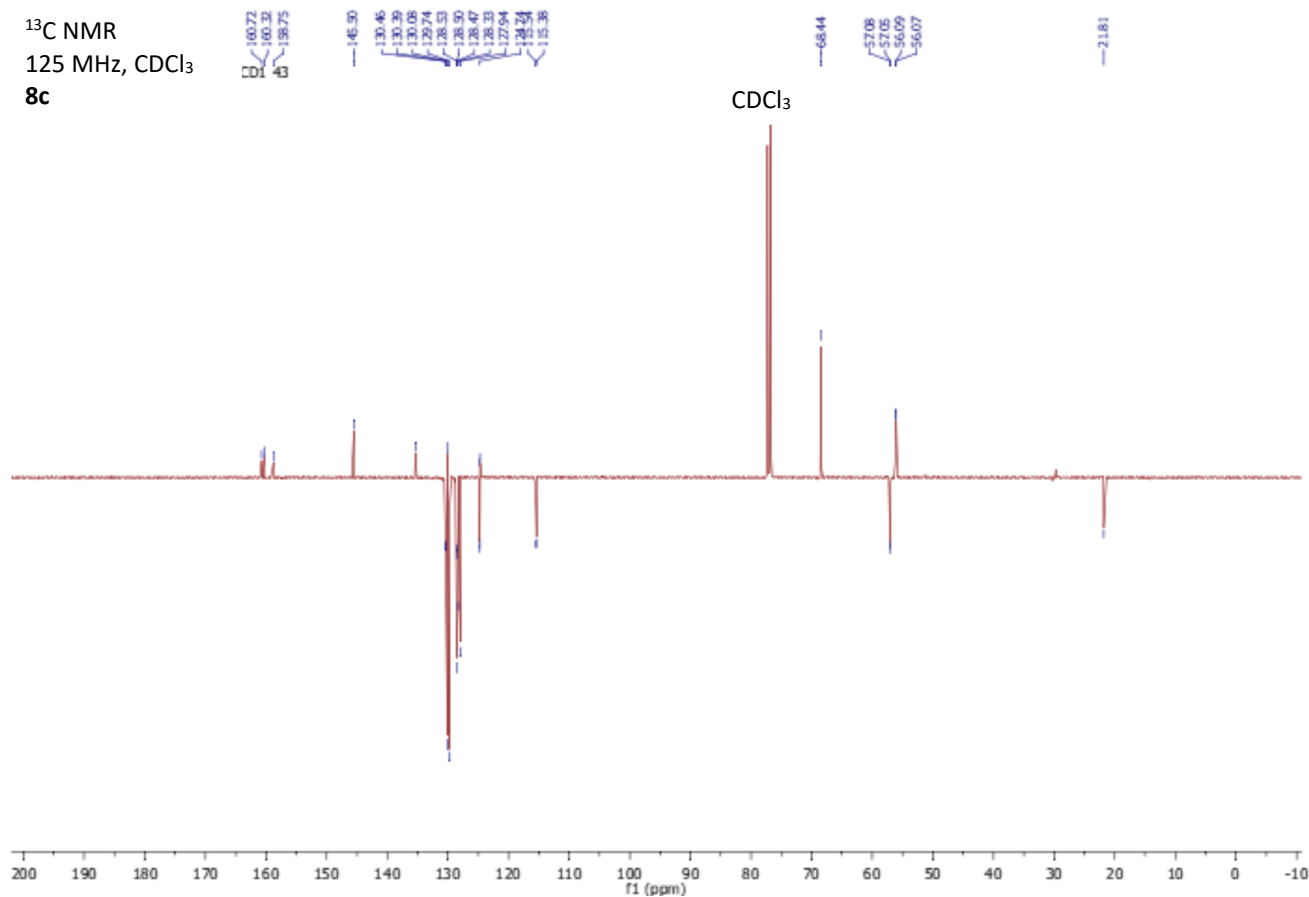

<sup>1</sup>H NMR  
500 MHz, d6-DMSO  
**8d**

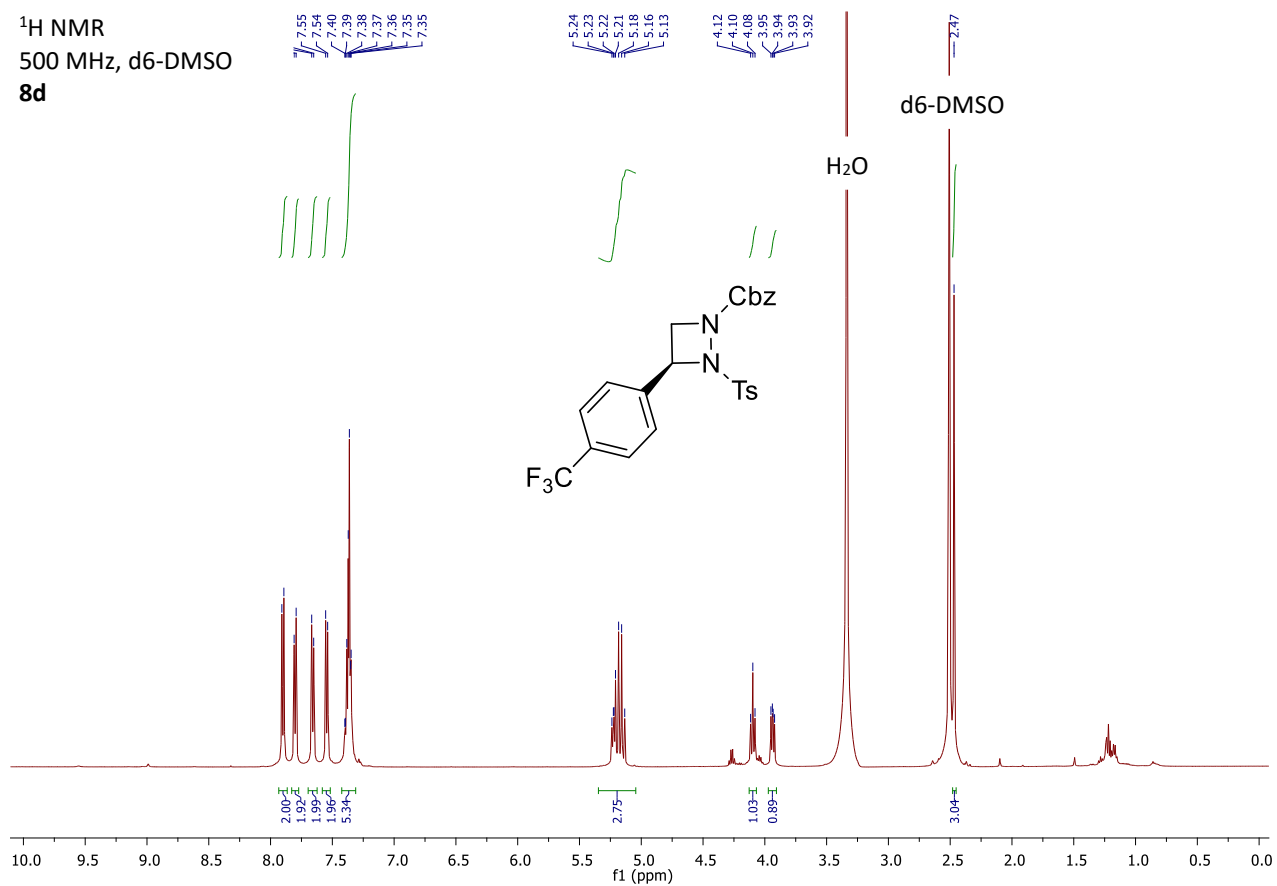

<sup>13</sup>C NMR  
125 MHz, d6-DMSO  
**8d**

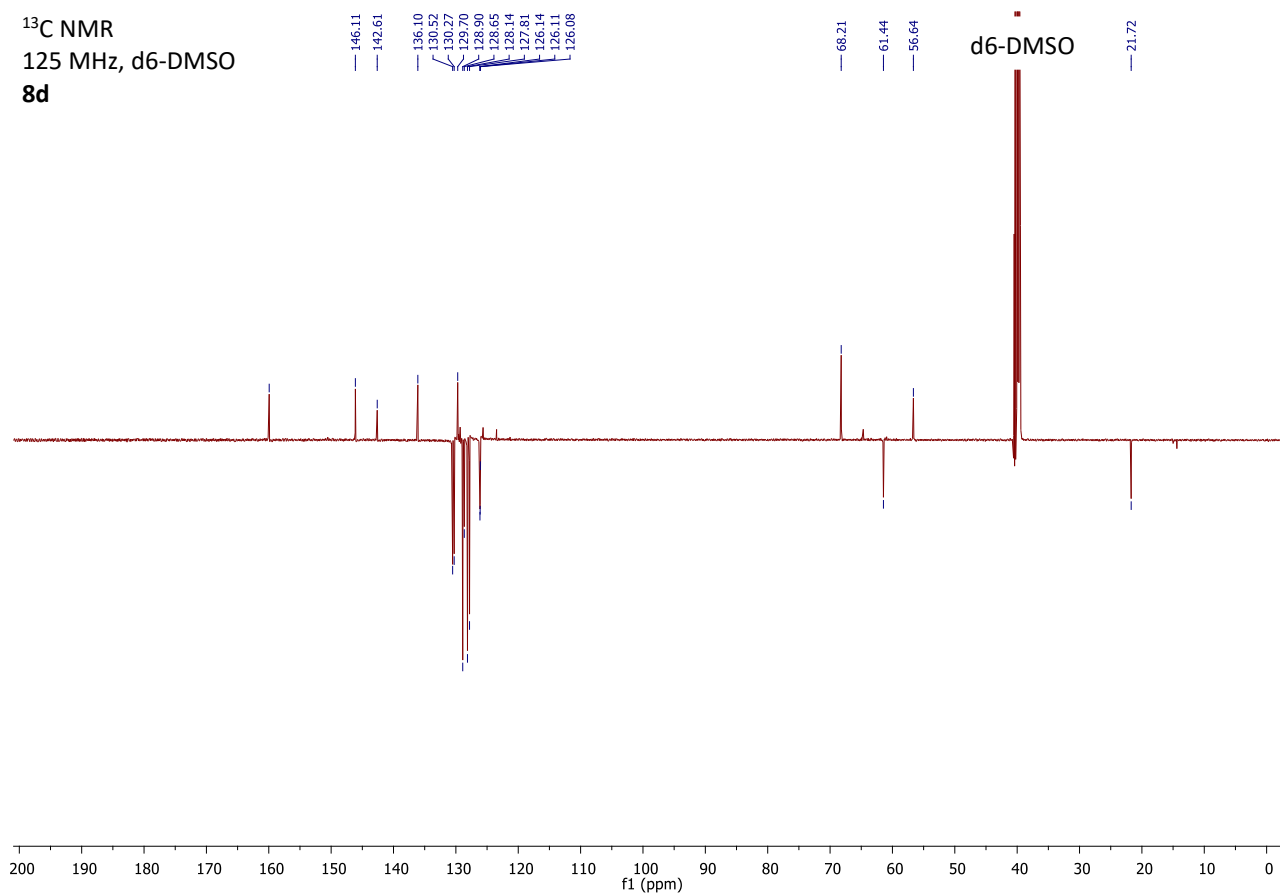

<sup>1</sup>H NMR  
500 MHz, CDCl<sub>3</sub>  
**8e**

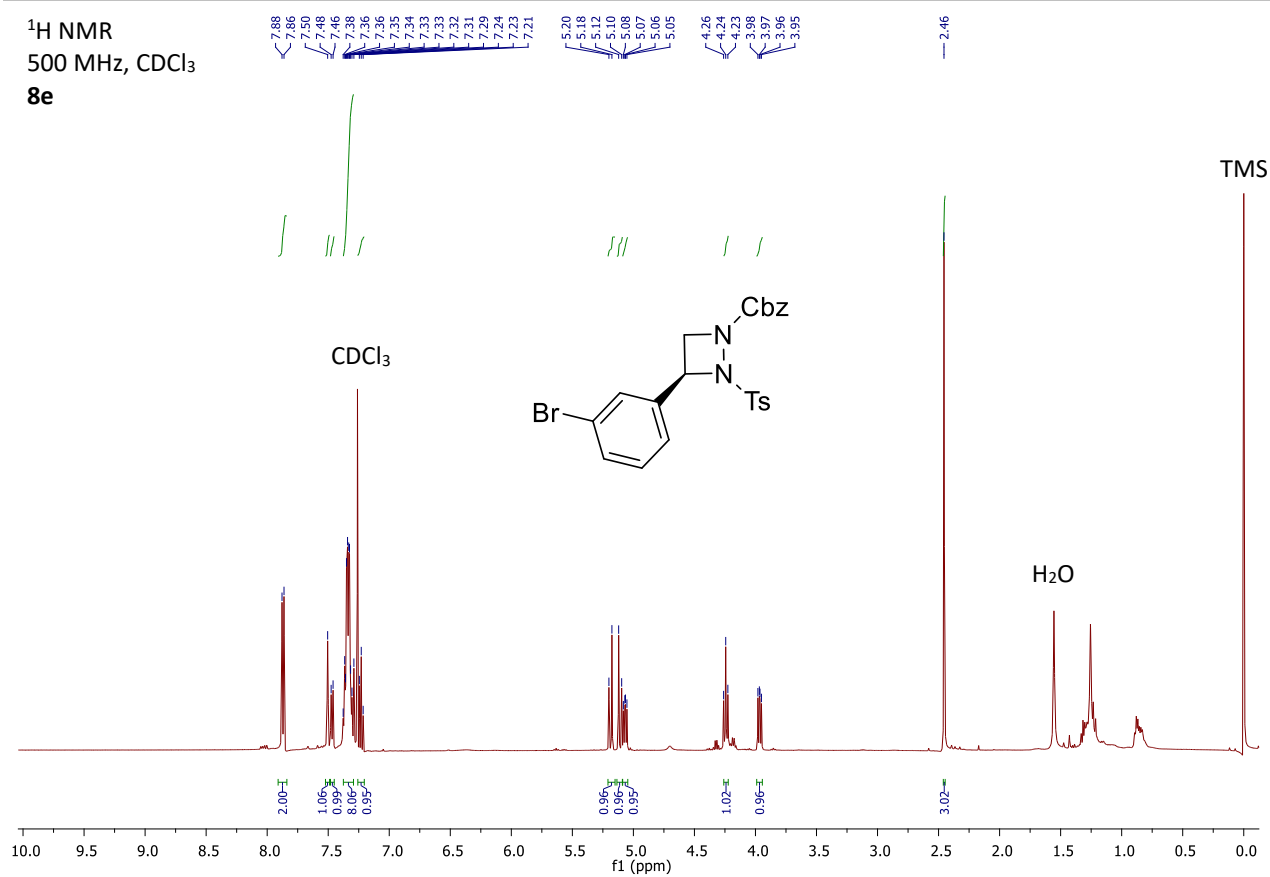

<sup>13</sup>C NMR  
125 MHz, CDCl<sub>3</sub>  
**8e**

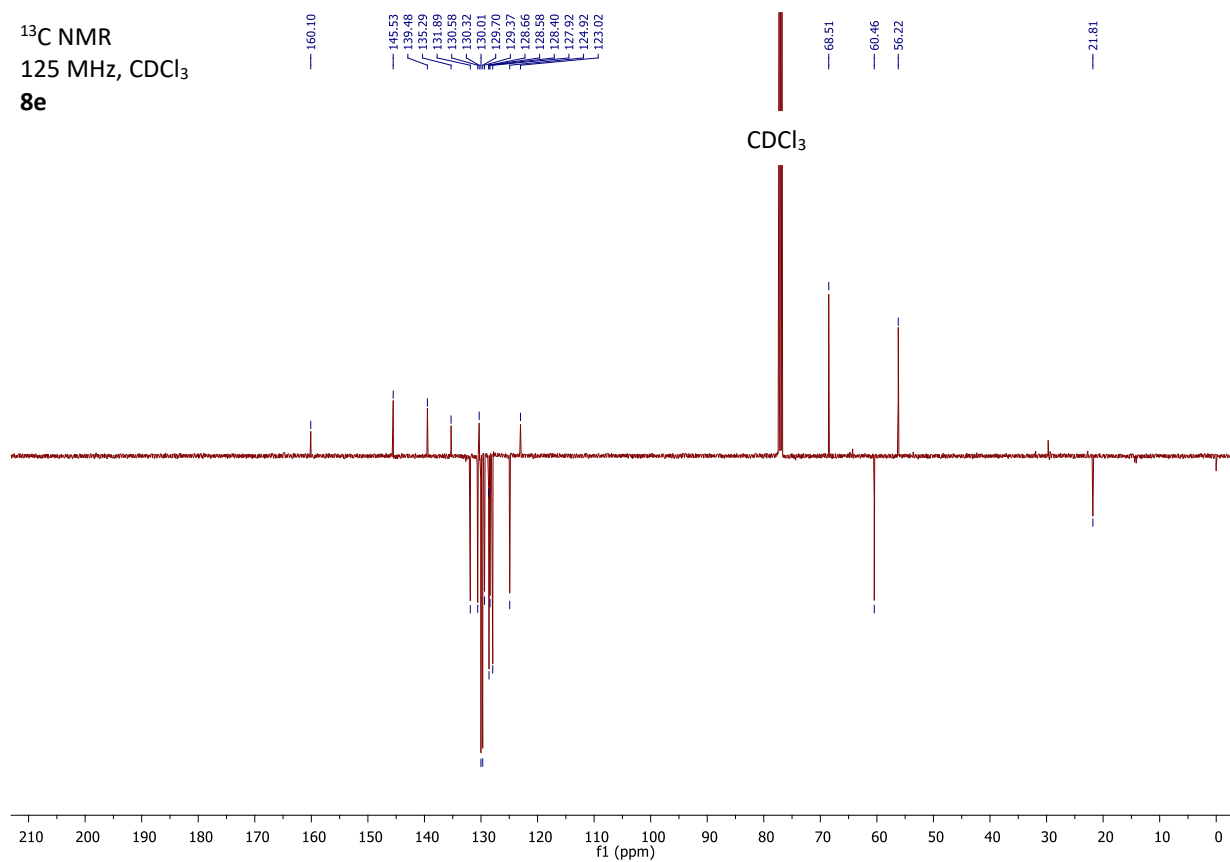



<sup>1</sup>H NMR  
500 MHz, CDCl<sub>3</sub>  
**8f**

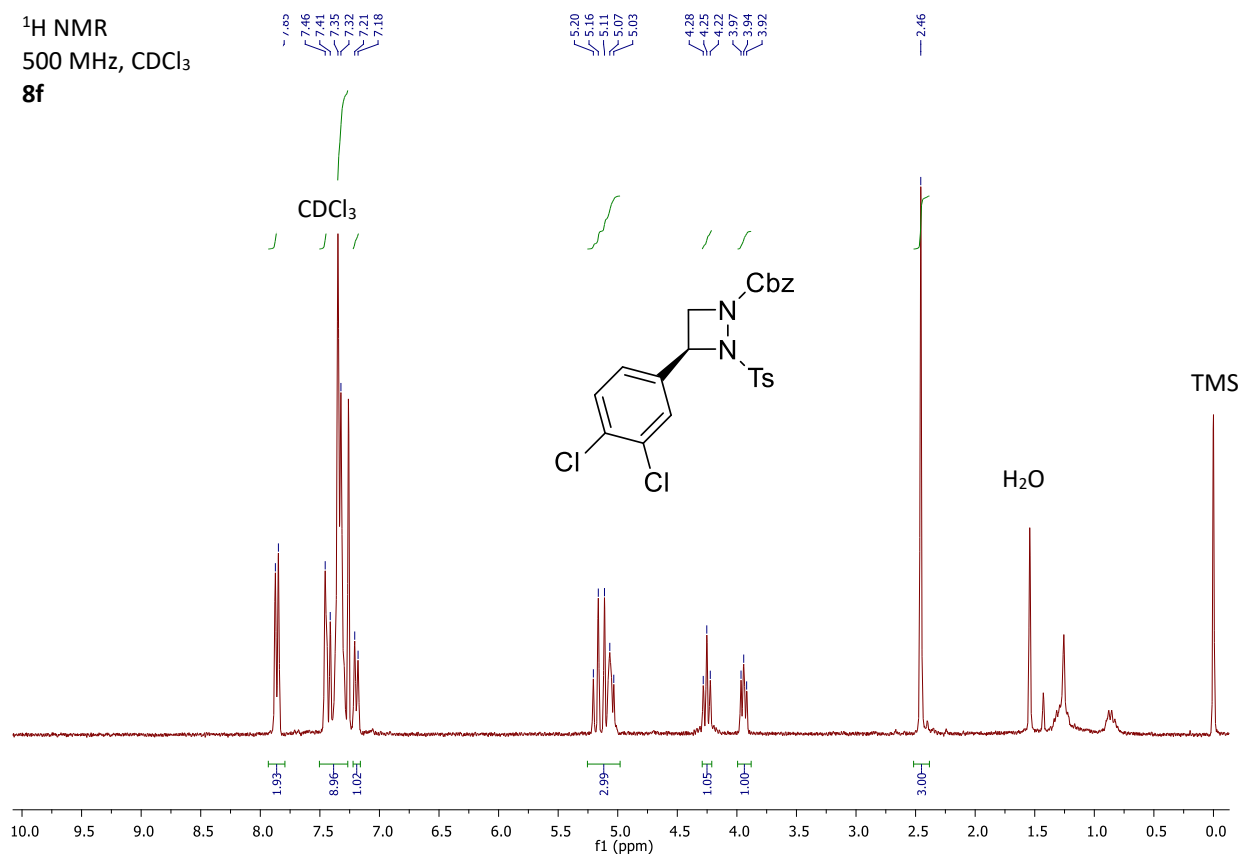

<sup>13</sup>C NMR  
125 MHz, CDCl<sub>3</sub>  
**8f**

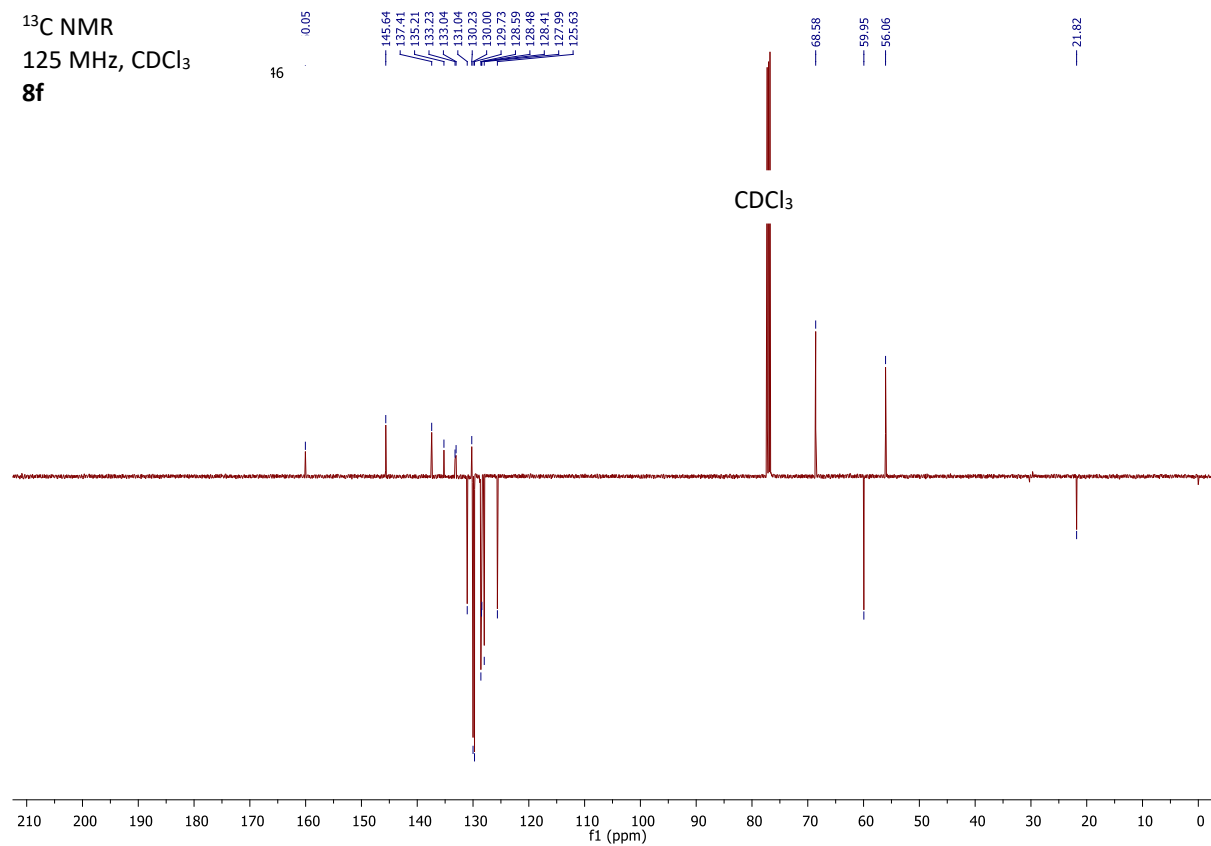

<sup>1</sup>H NMR  
500 MHz, CDCl<sub>3</sub>  
**8g**

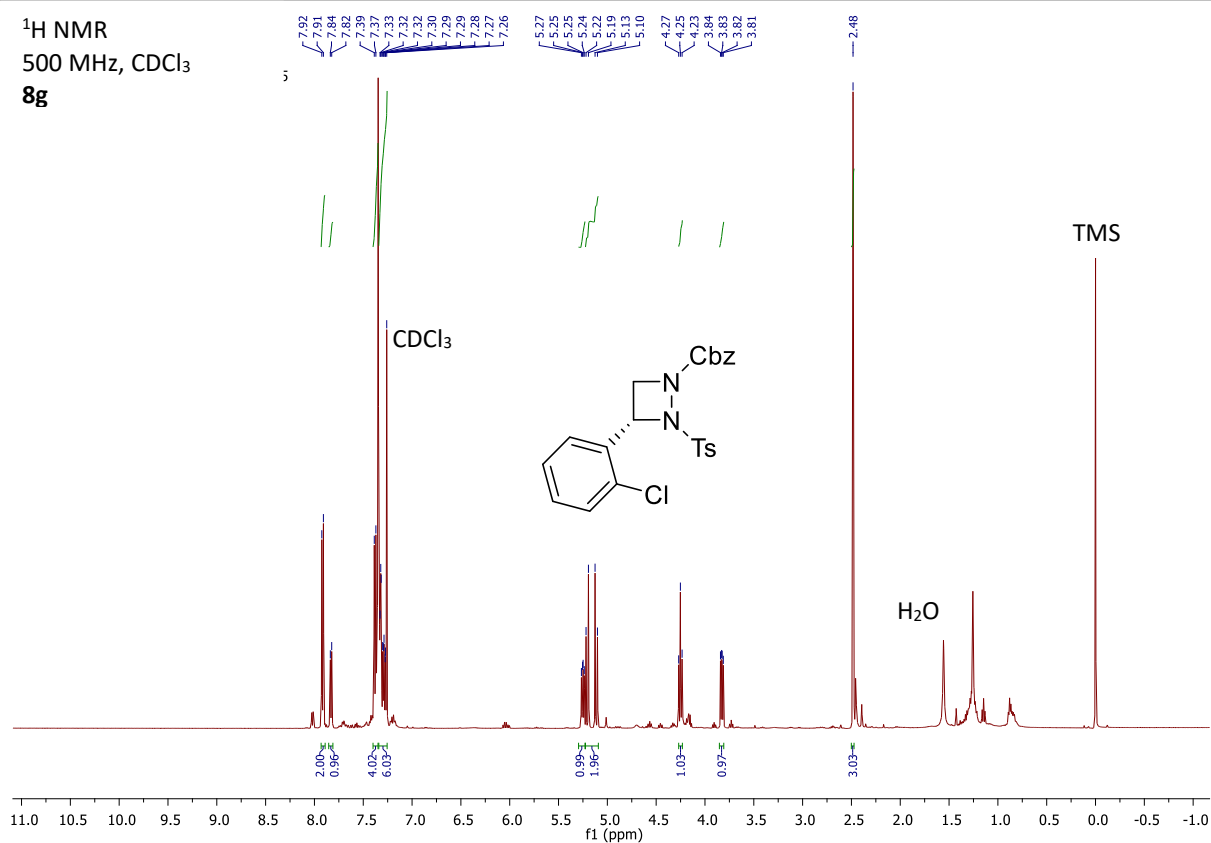

<sup>13</sup>C NMR  
125 MHz, CDCl<sub>3</sub>  
**8g**

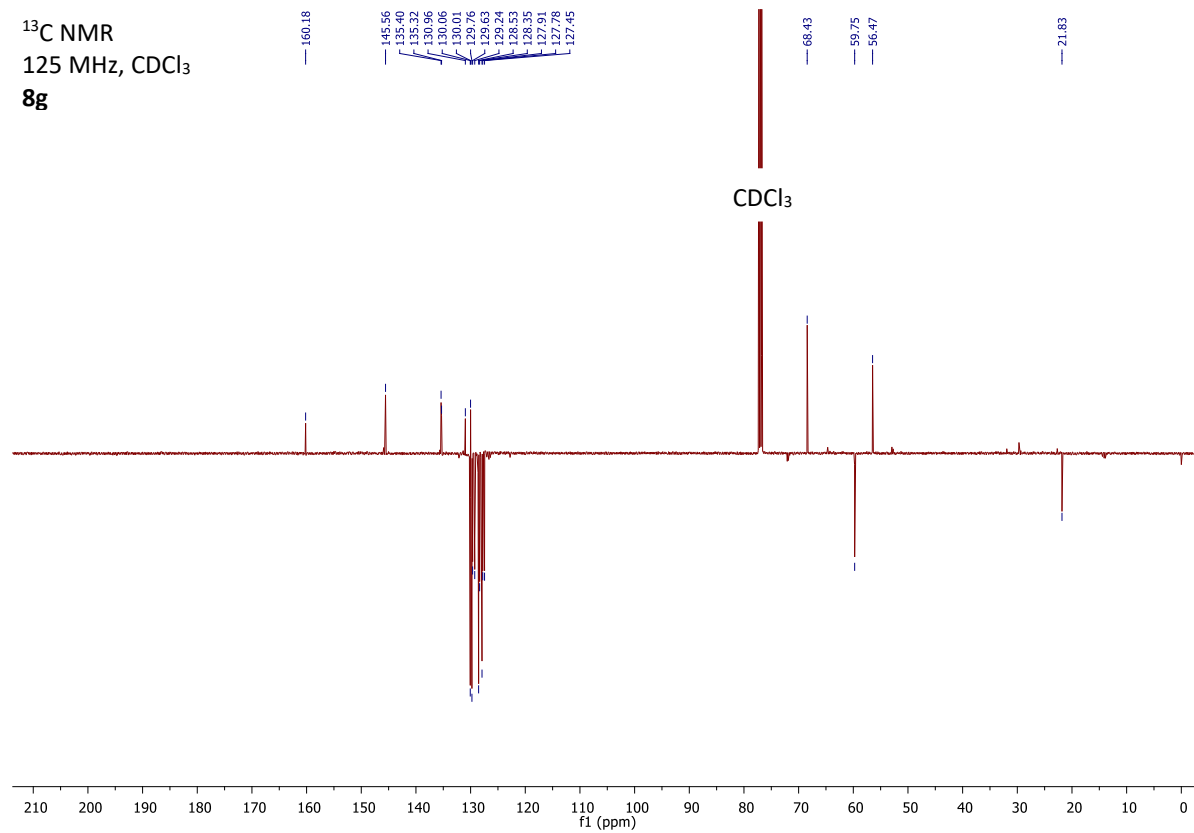

<sup>1</sup>H NMR  
500 MHz, CDCl<sub>3</sub>  
**8h**

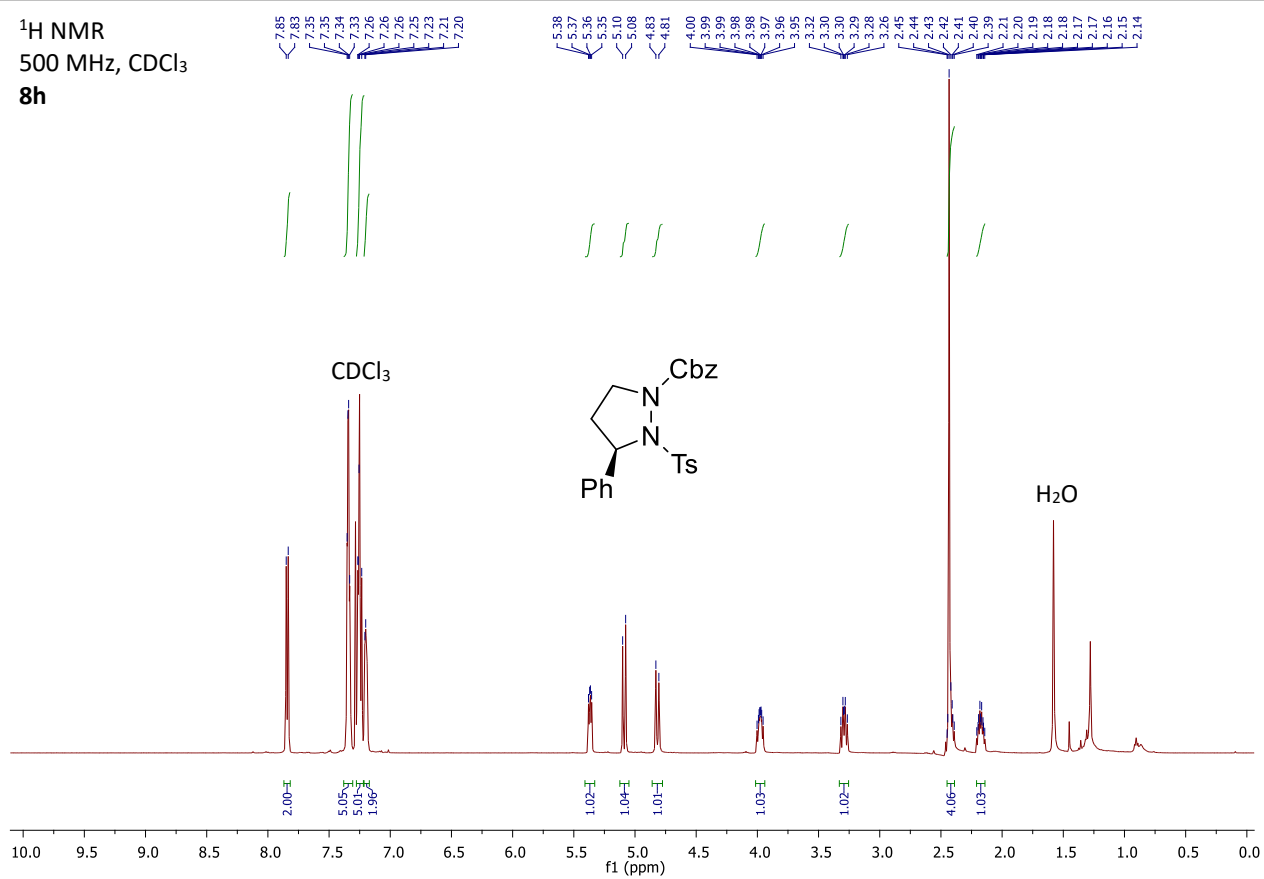

<sup>13</sup>C NMR  
125 MHz, CDCl<sub>3</sub>  
**8h**

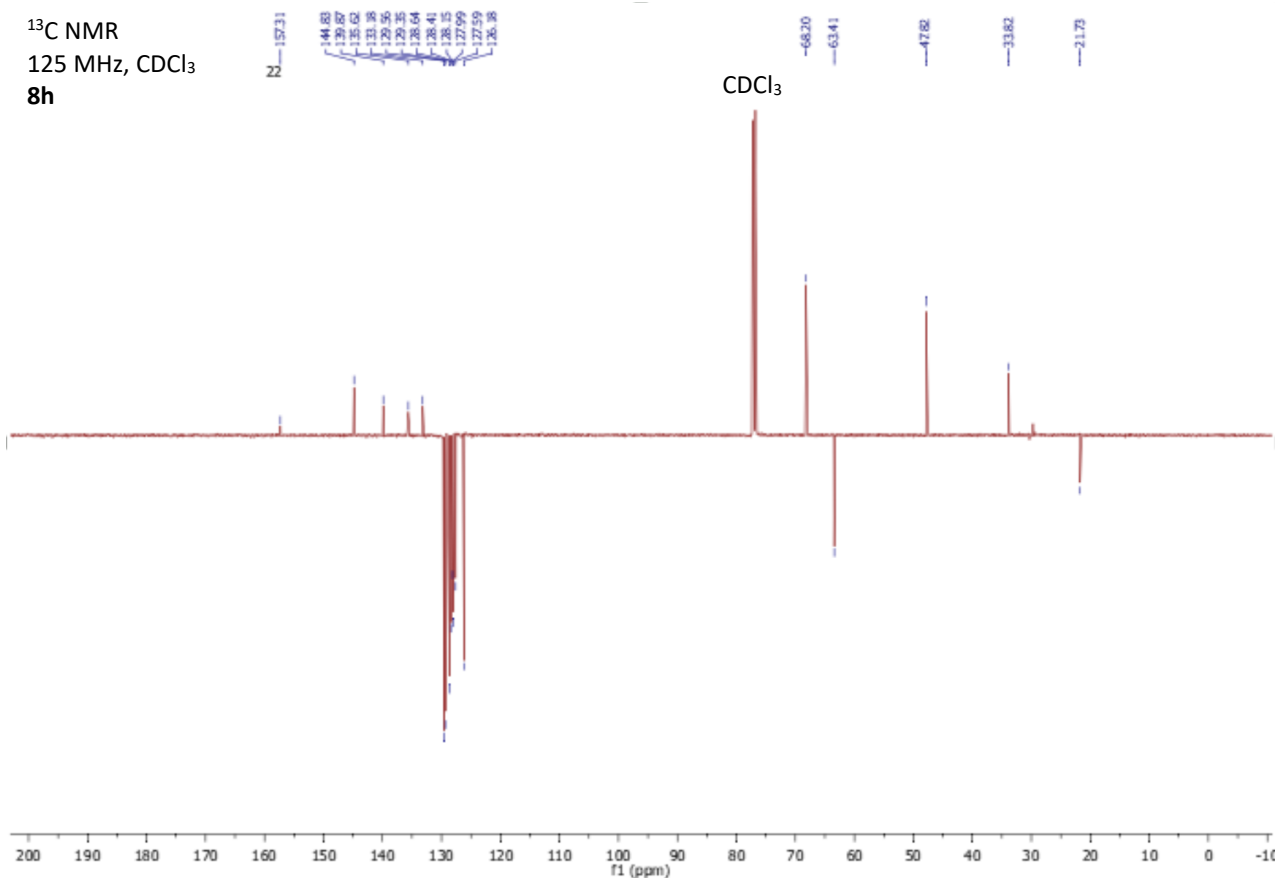

<sup>1</sup>H NMR  
500 MHz, CDCl<sub>3</sub>  
**8i**

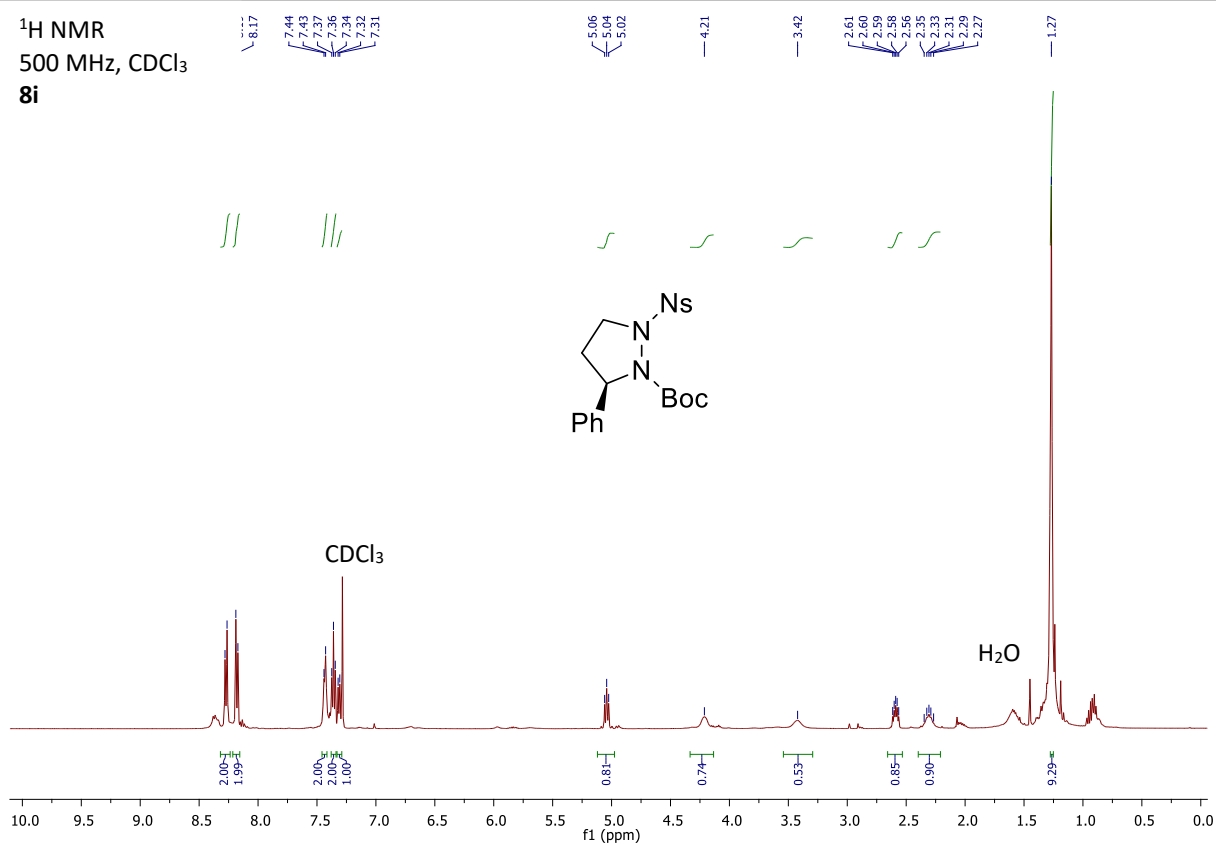

May10-2018

<sup>13</sup>C NMR  
125 MHz, CDCl<sub>3</sub>  
**8i**

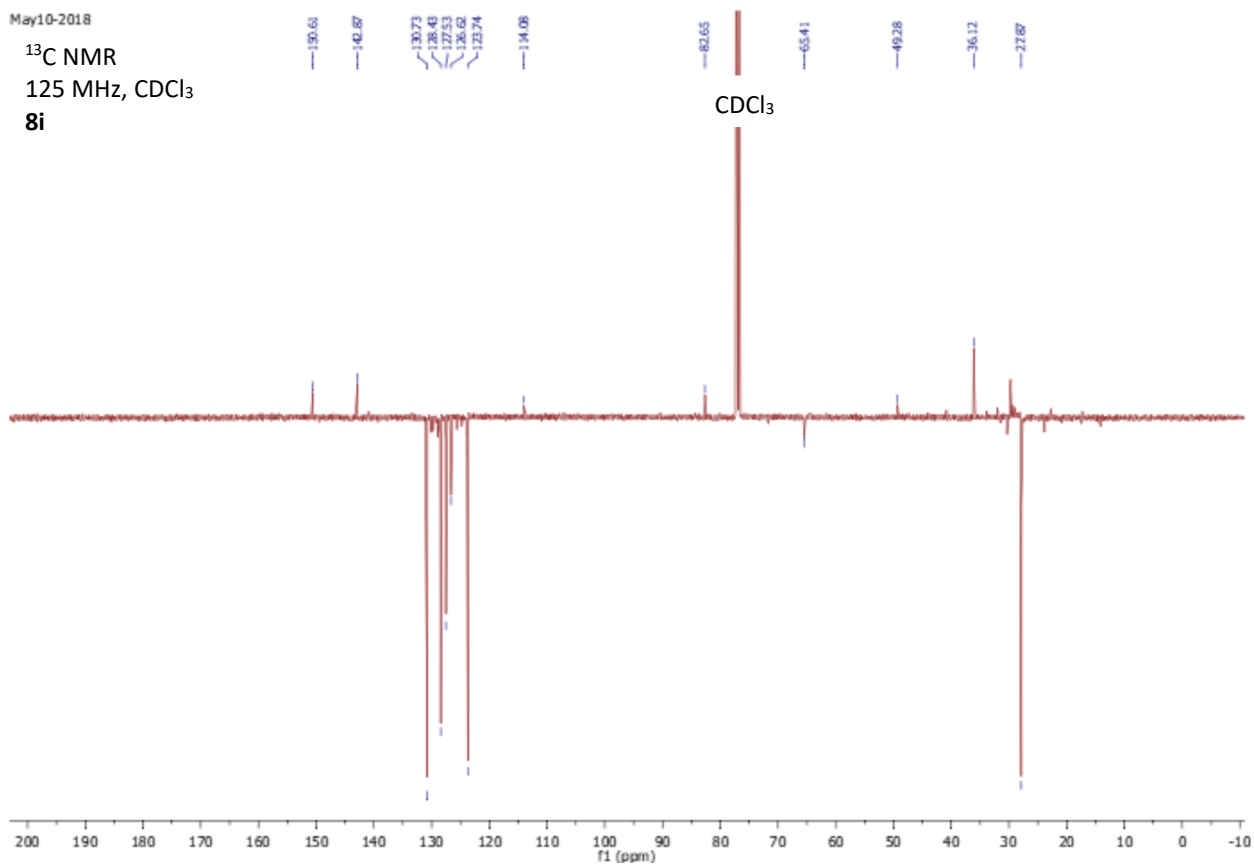

<sup>1</sup>H NMR  
500 MHz, CDCl<sub>3</sub>  
**8j**

RS 43

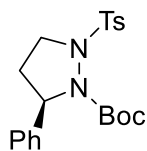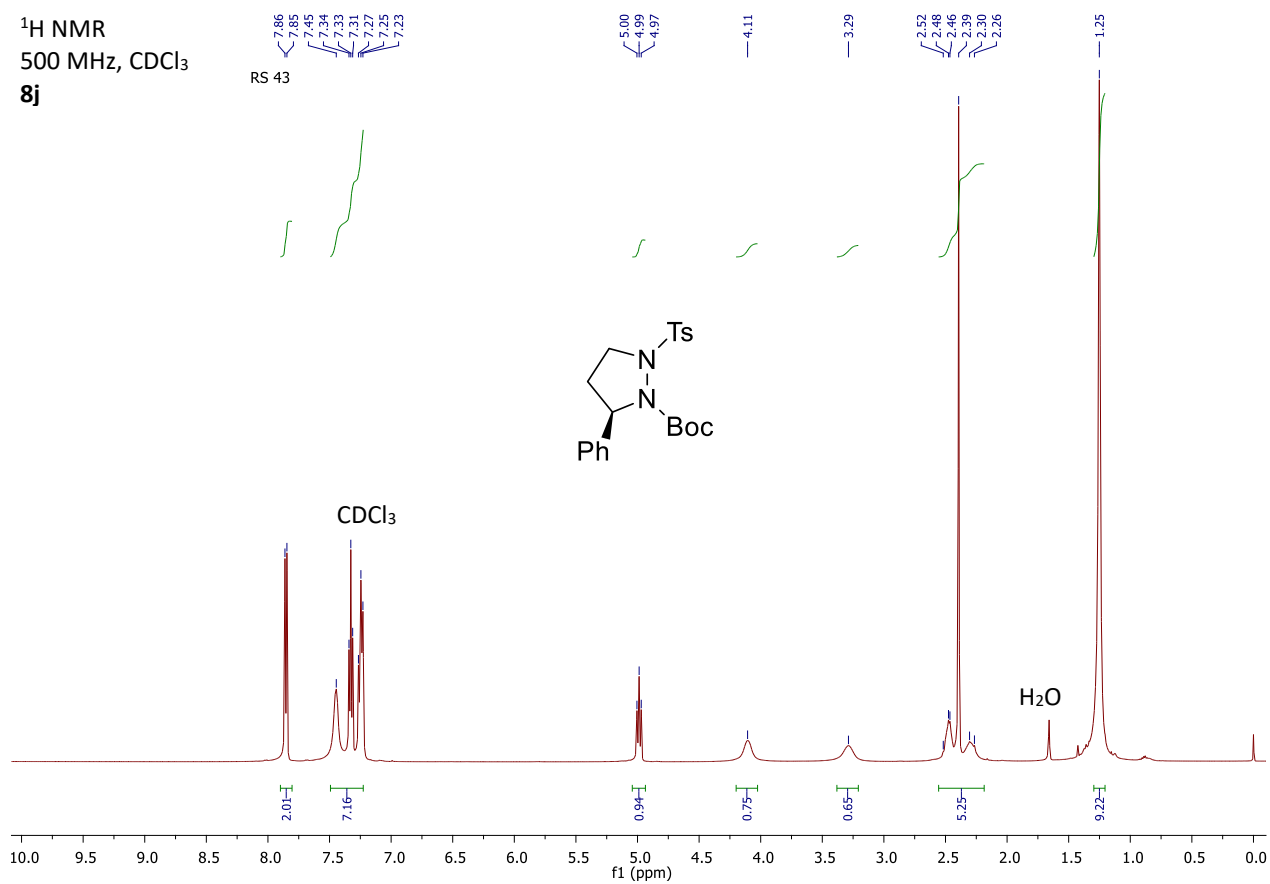

<sup>13</sup>C NMR  
125 MHz, CDCl<sub>3</sub>  
**8j**

RS 43

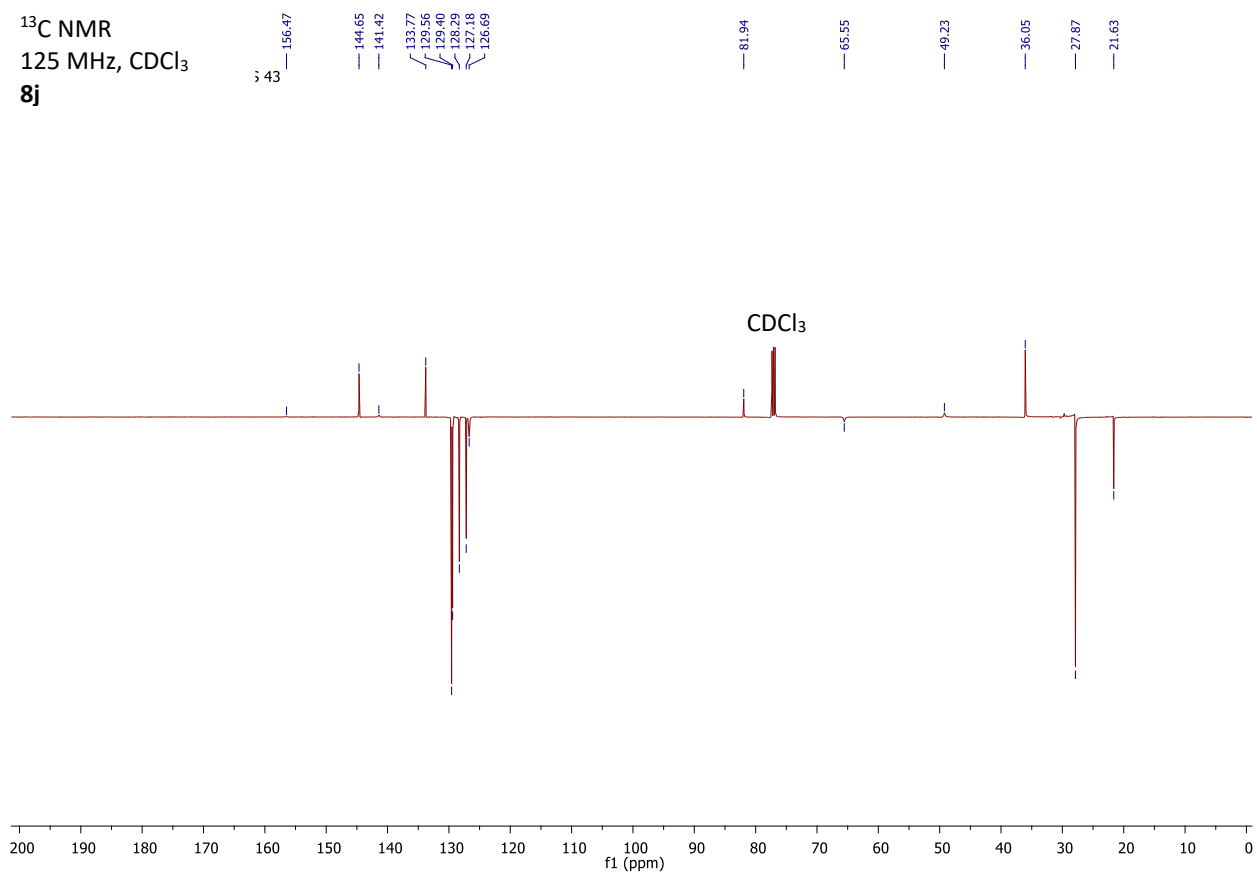

<sup>1</sup>H NMR  
500 MHz, CDCl<sub>3</sub>  
**8k**

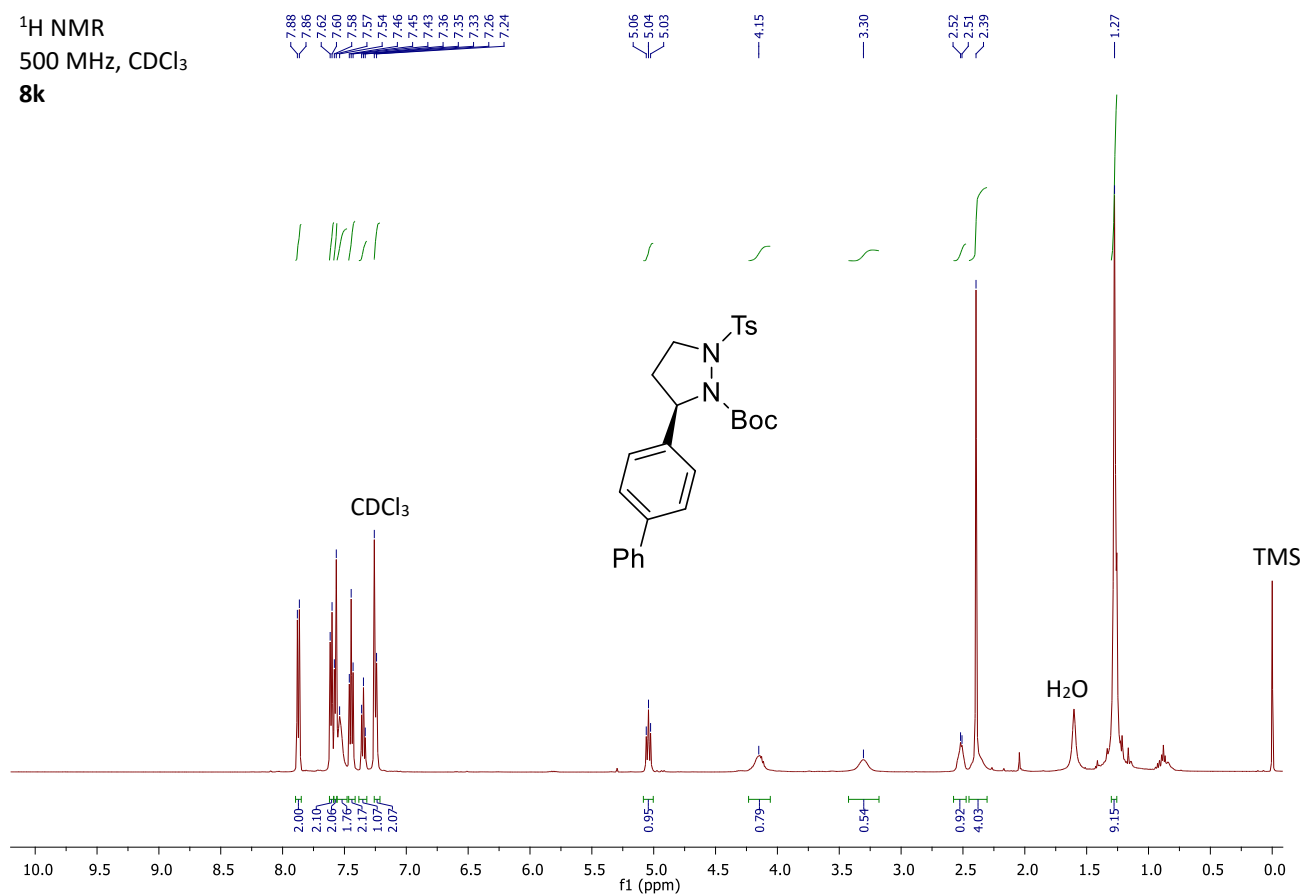

<sup>13</sup>C NMR  
125 MHz, CDCl<sub>3</sub>  
**8k**

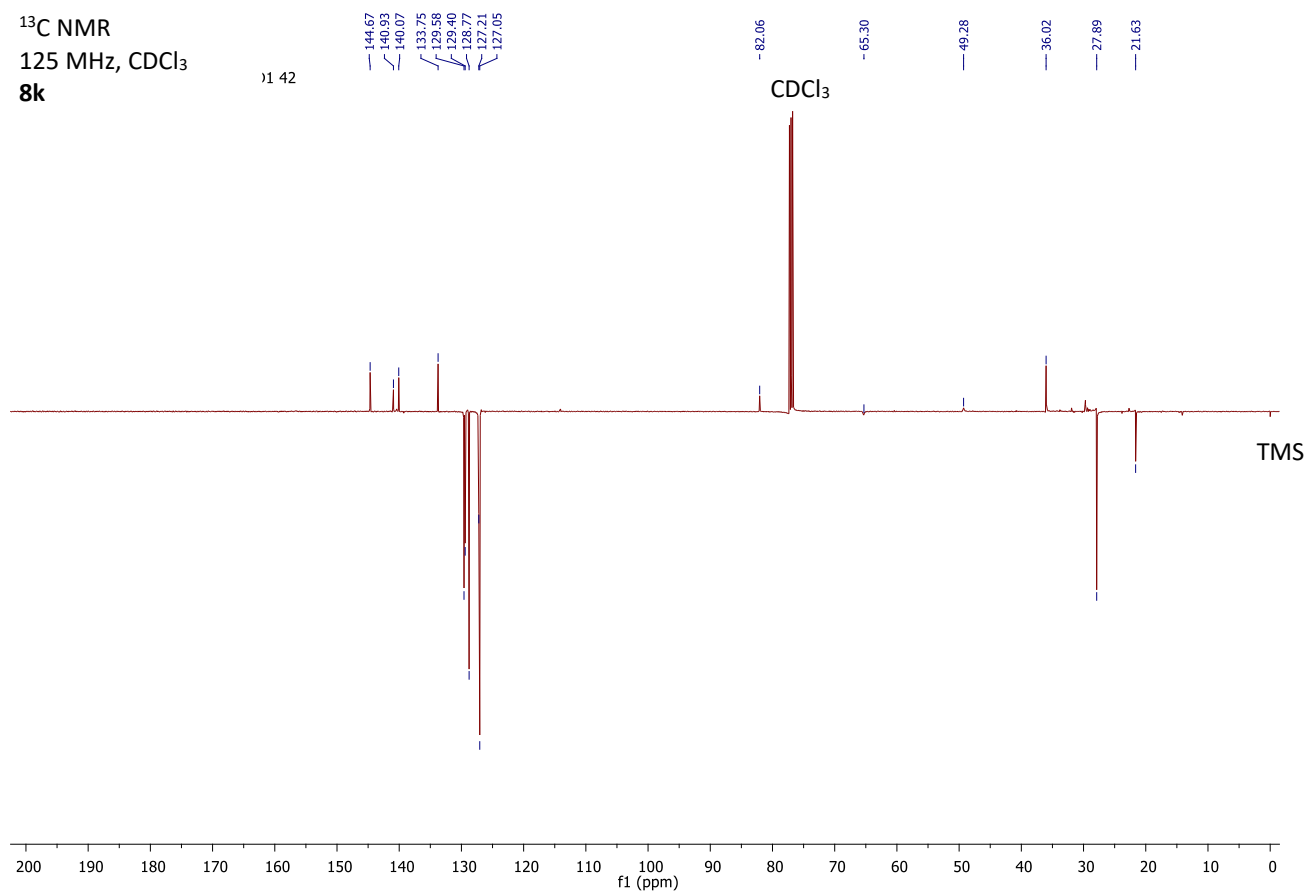

<sup>1</sup>H NMR  
500 MHz, CDCl<sub>3</sub>  
**8l**

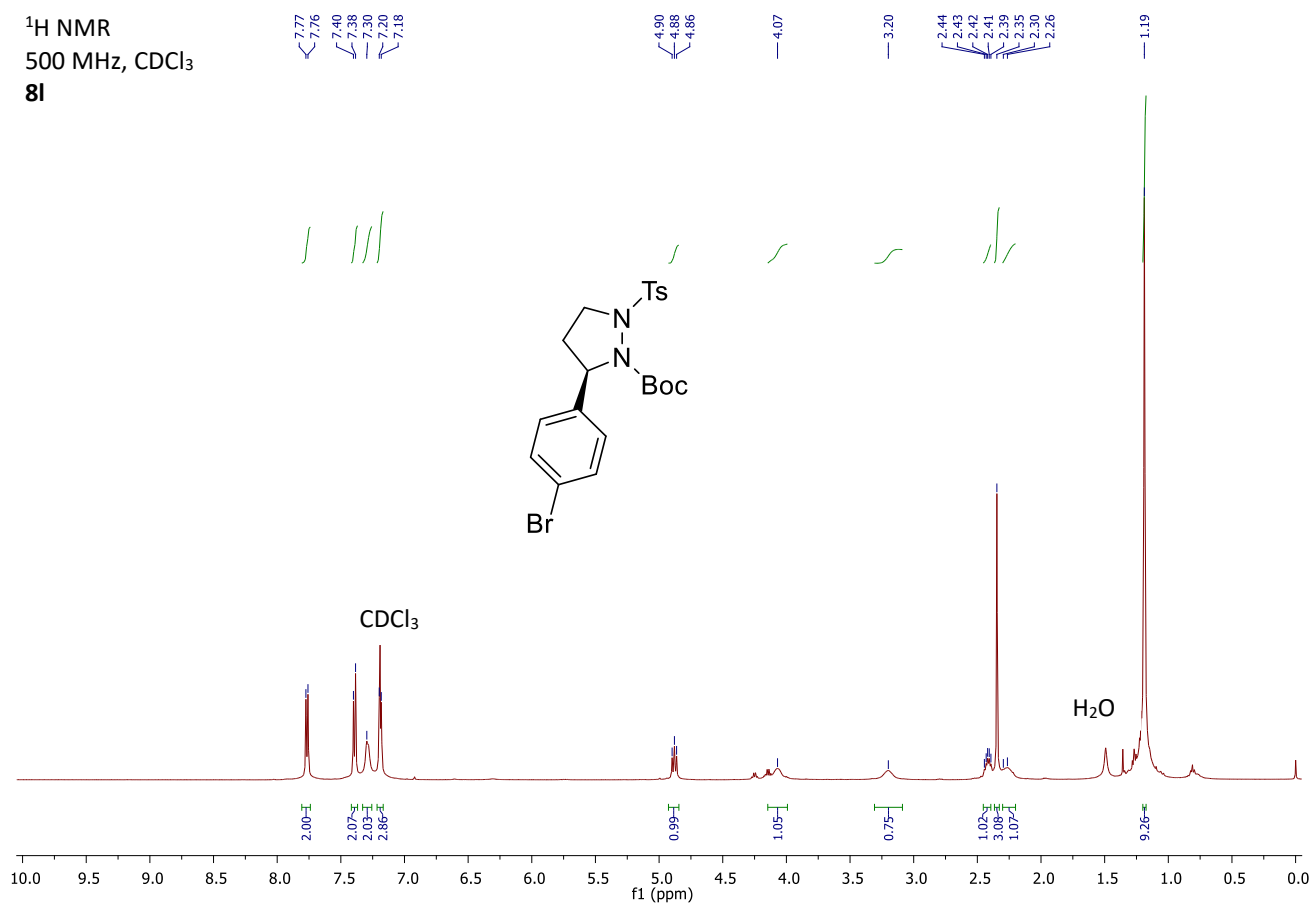

May10-2018

<sup>13</sup>C NMR  
125 MHz, CDCl<sub>3</sub>  
**8l**

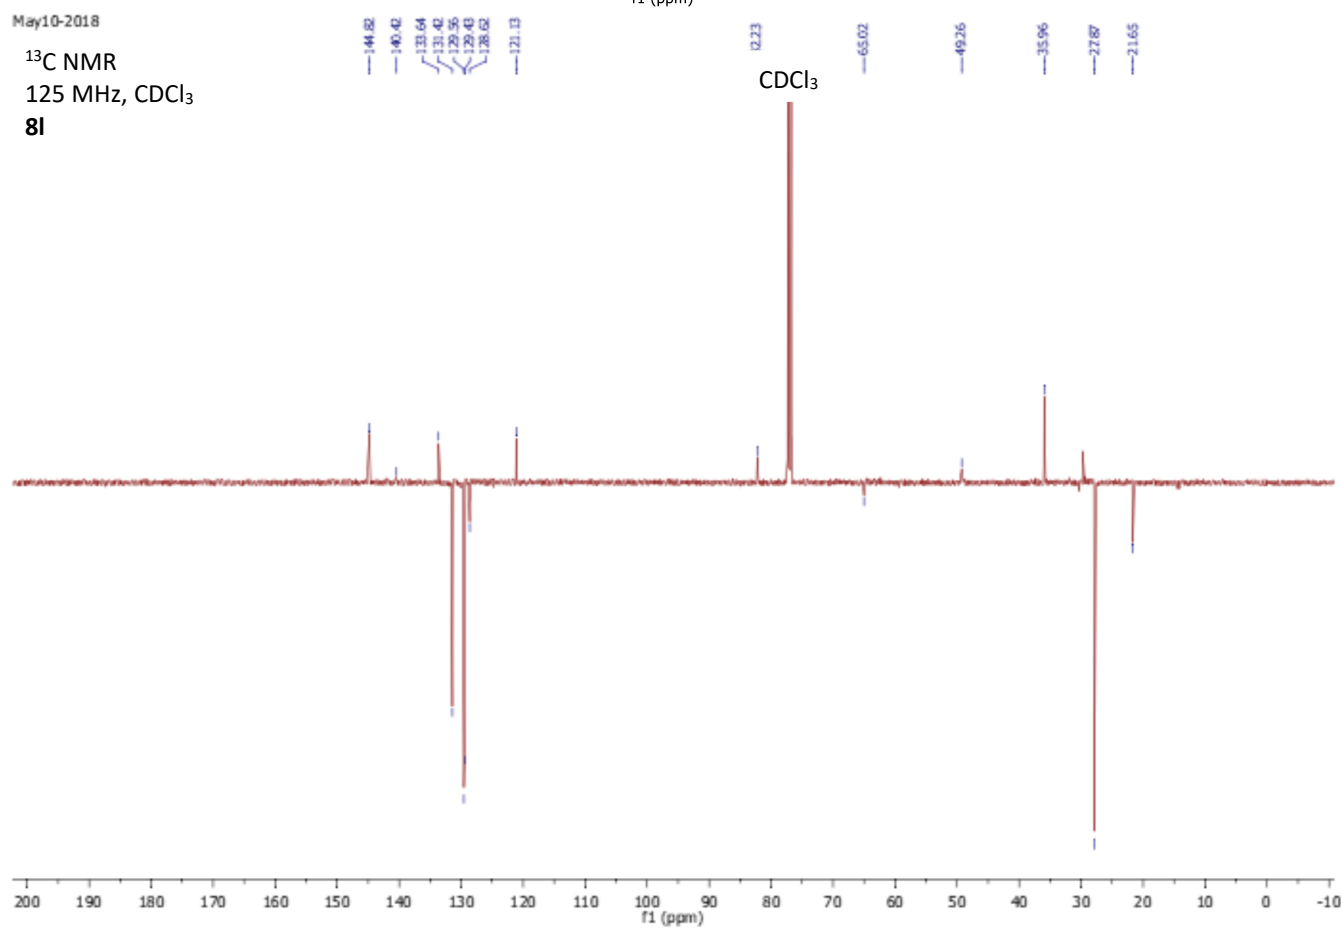

<sup>1</sup>H NMR  
500 MHz, CDCl<sub>3</sub>  
8m

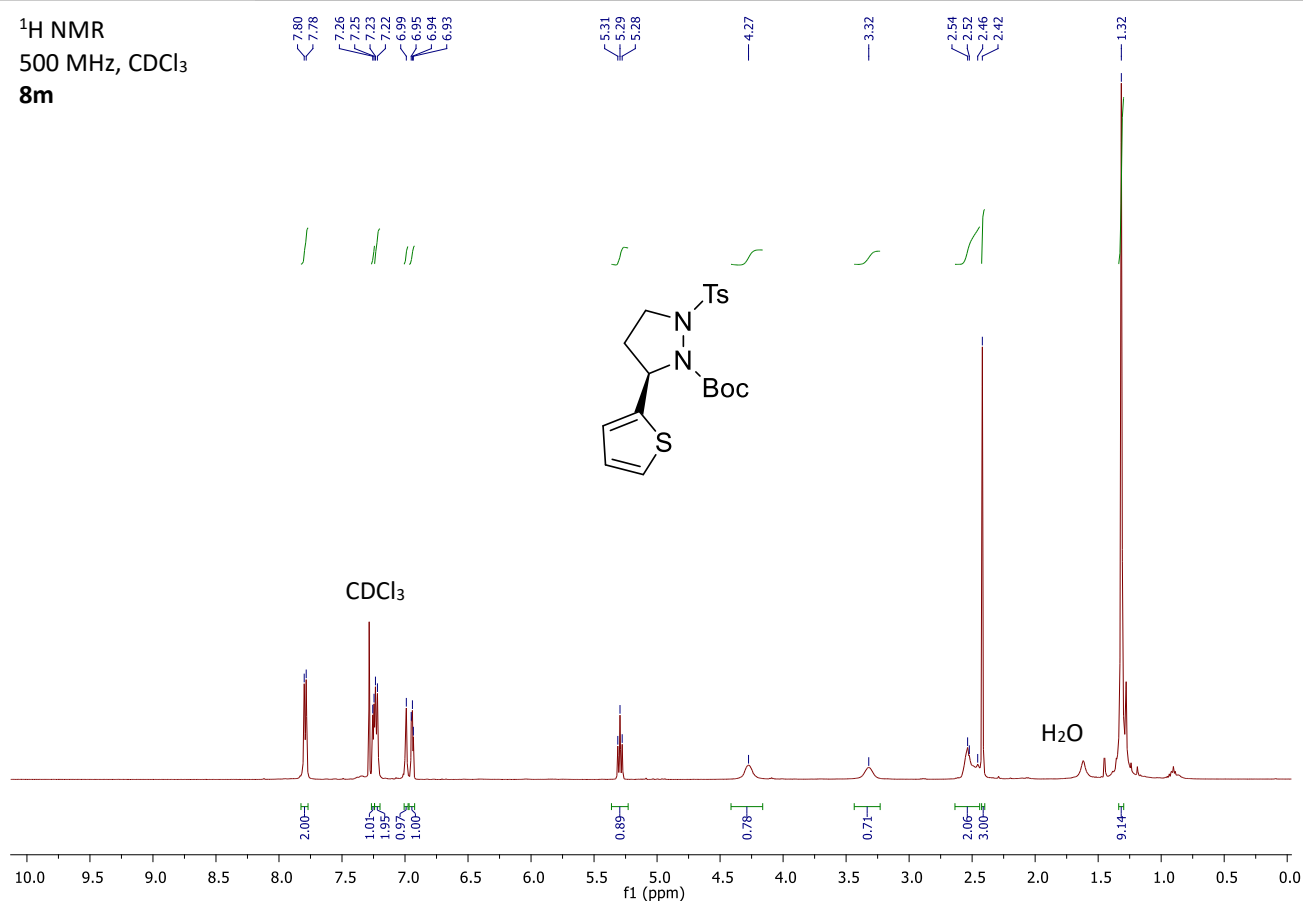

<sup>13</sup>C NMR  
125 MHz, CDCl<sub>3</sub>  
8m

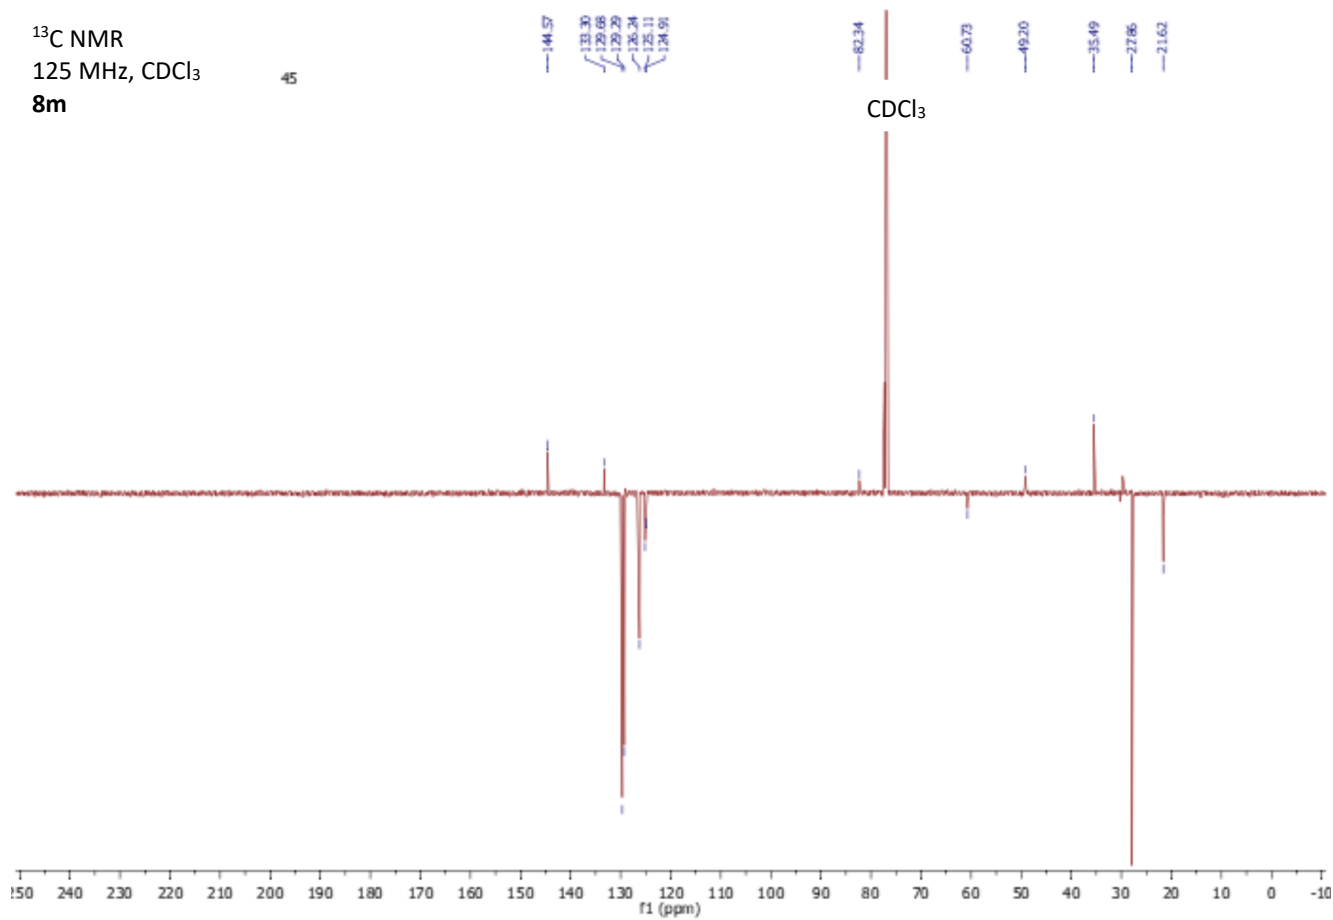



<sup>1</sup>H NMR  
300 MHz, CDCl<sub>3</sub>  
**8n**

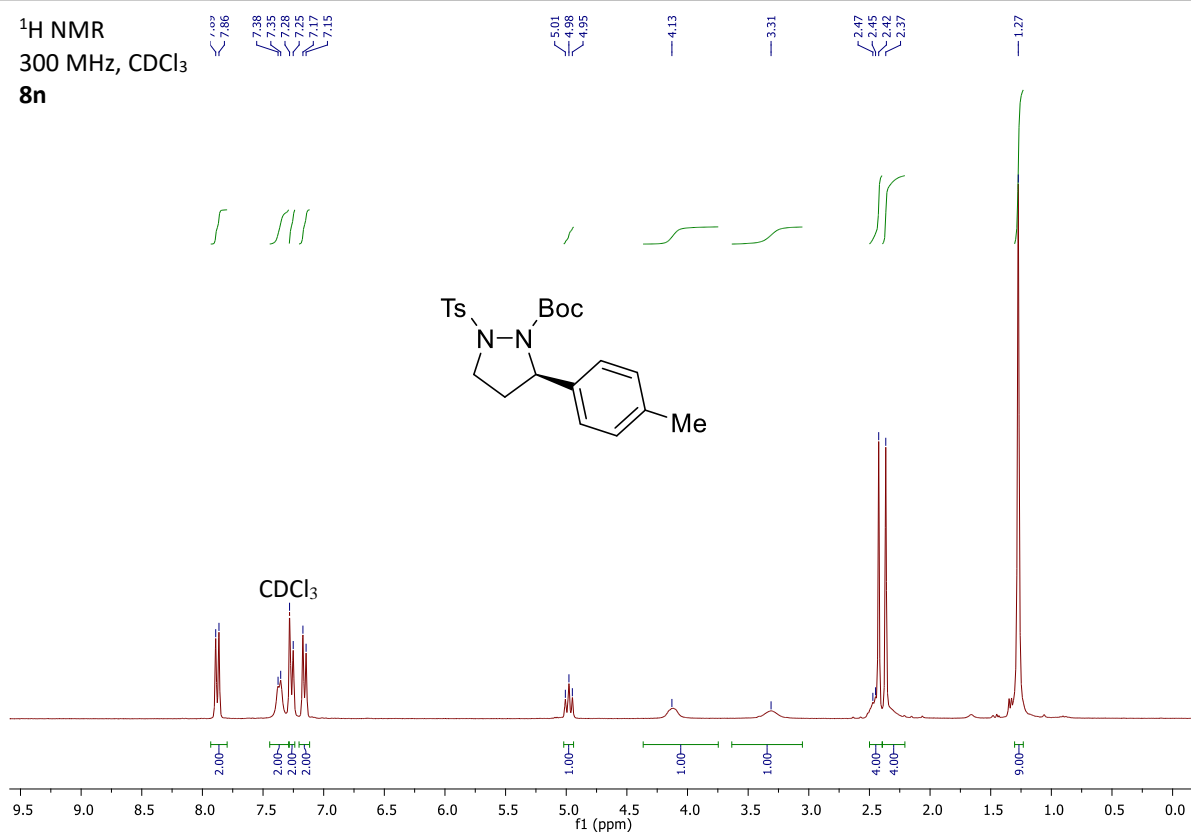

<sup>13</sup>C NMR  
101 MHz, CDCl<sub>3</sub>  
**8n**

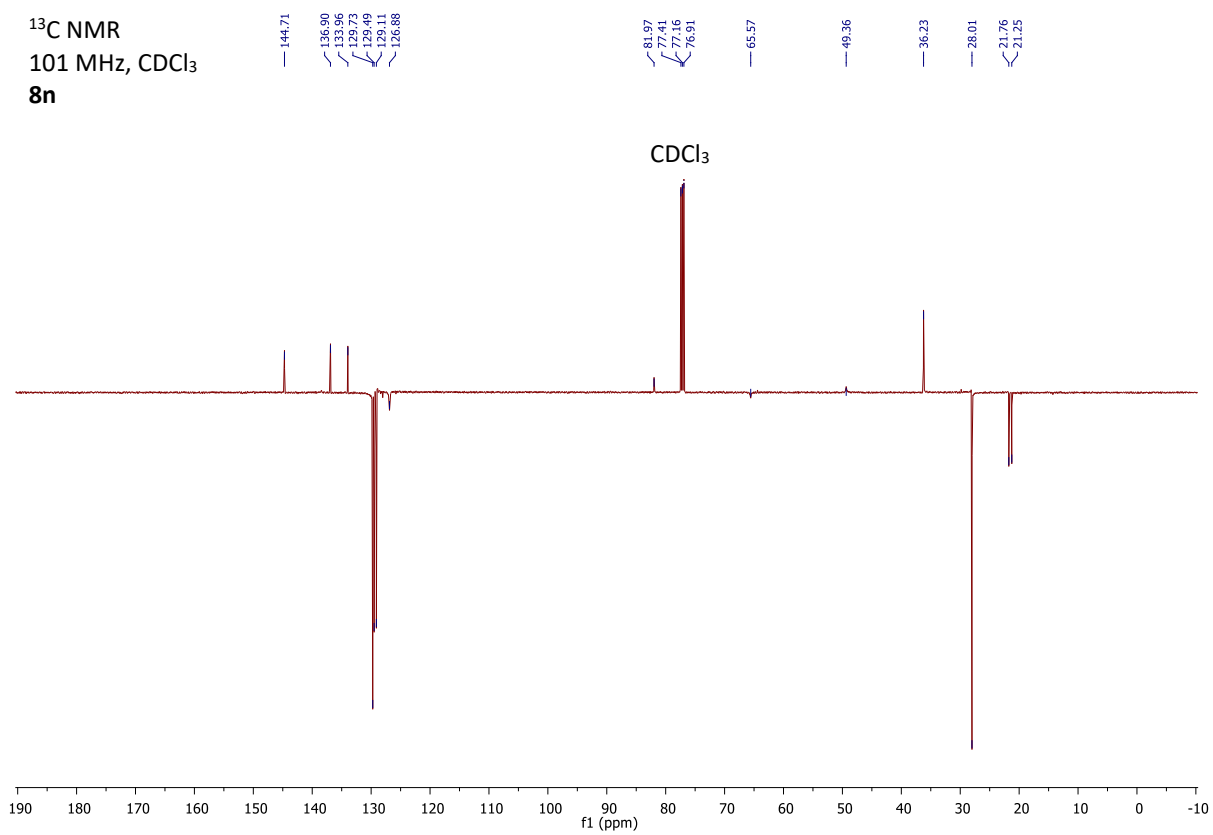

<sup>1</sup>H NMR  
600 MHz, CDCl<sub>3</sub>  
**8o**

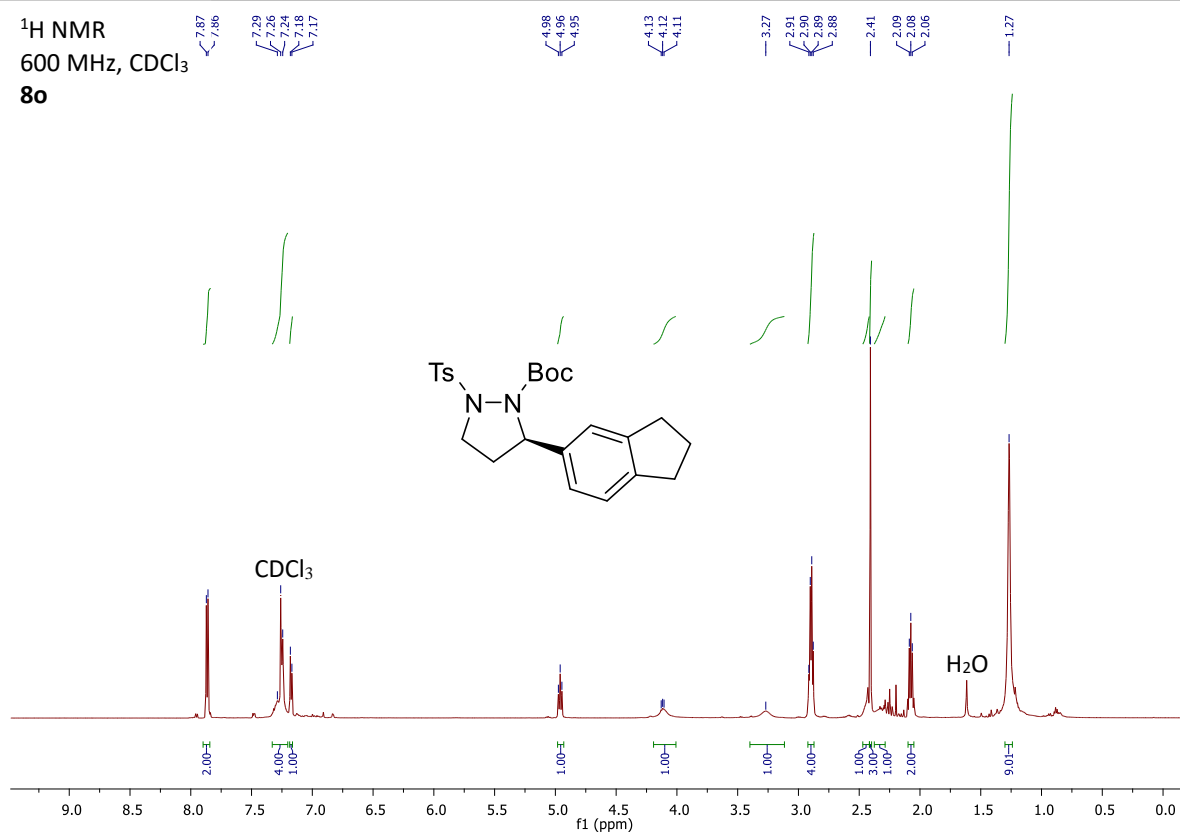

<sup>13</sup>C NMR  
151 MHz, CDCl<sub>3</sub>  
**8o**

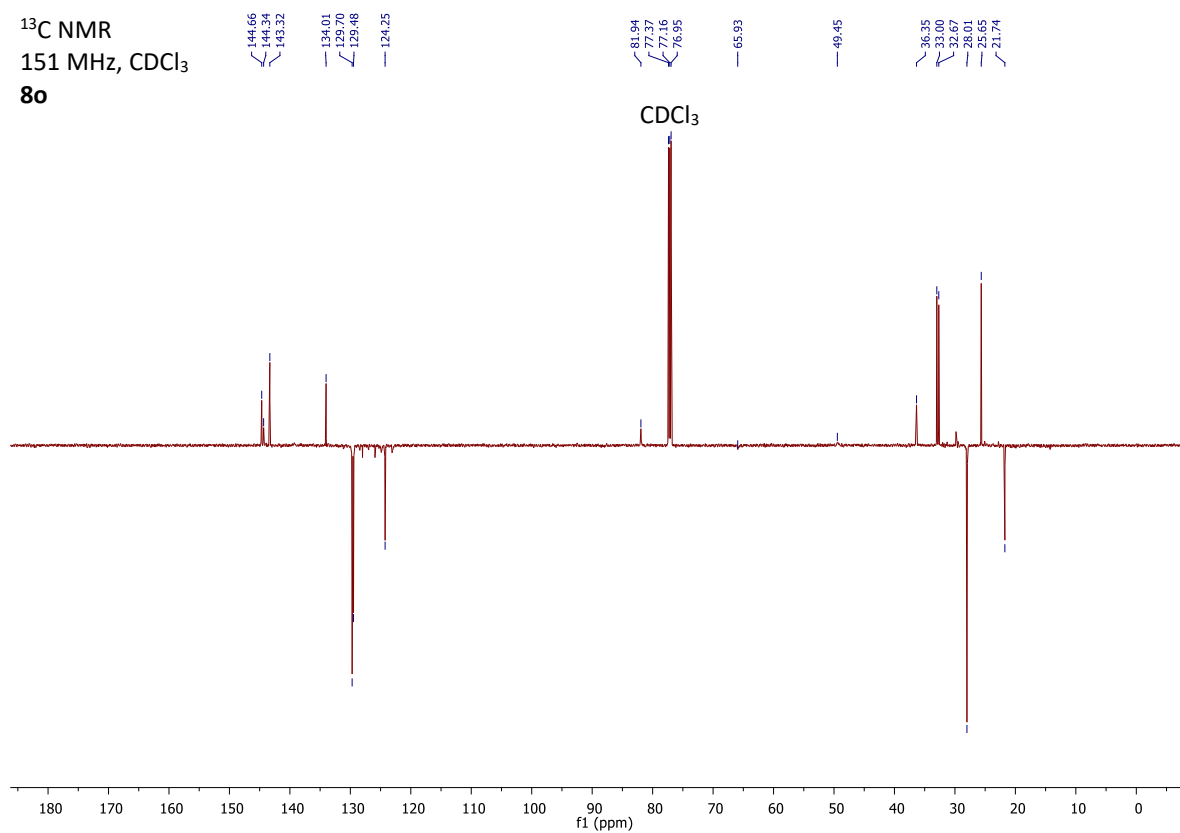

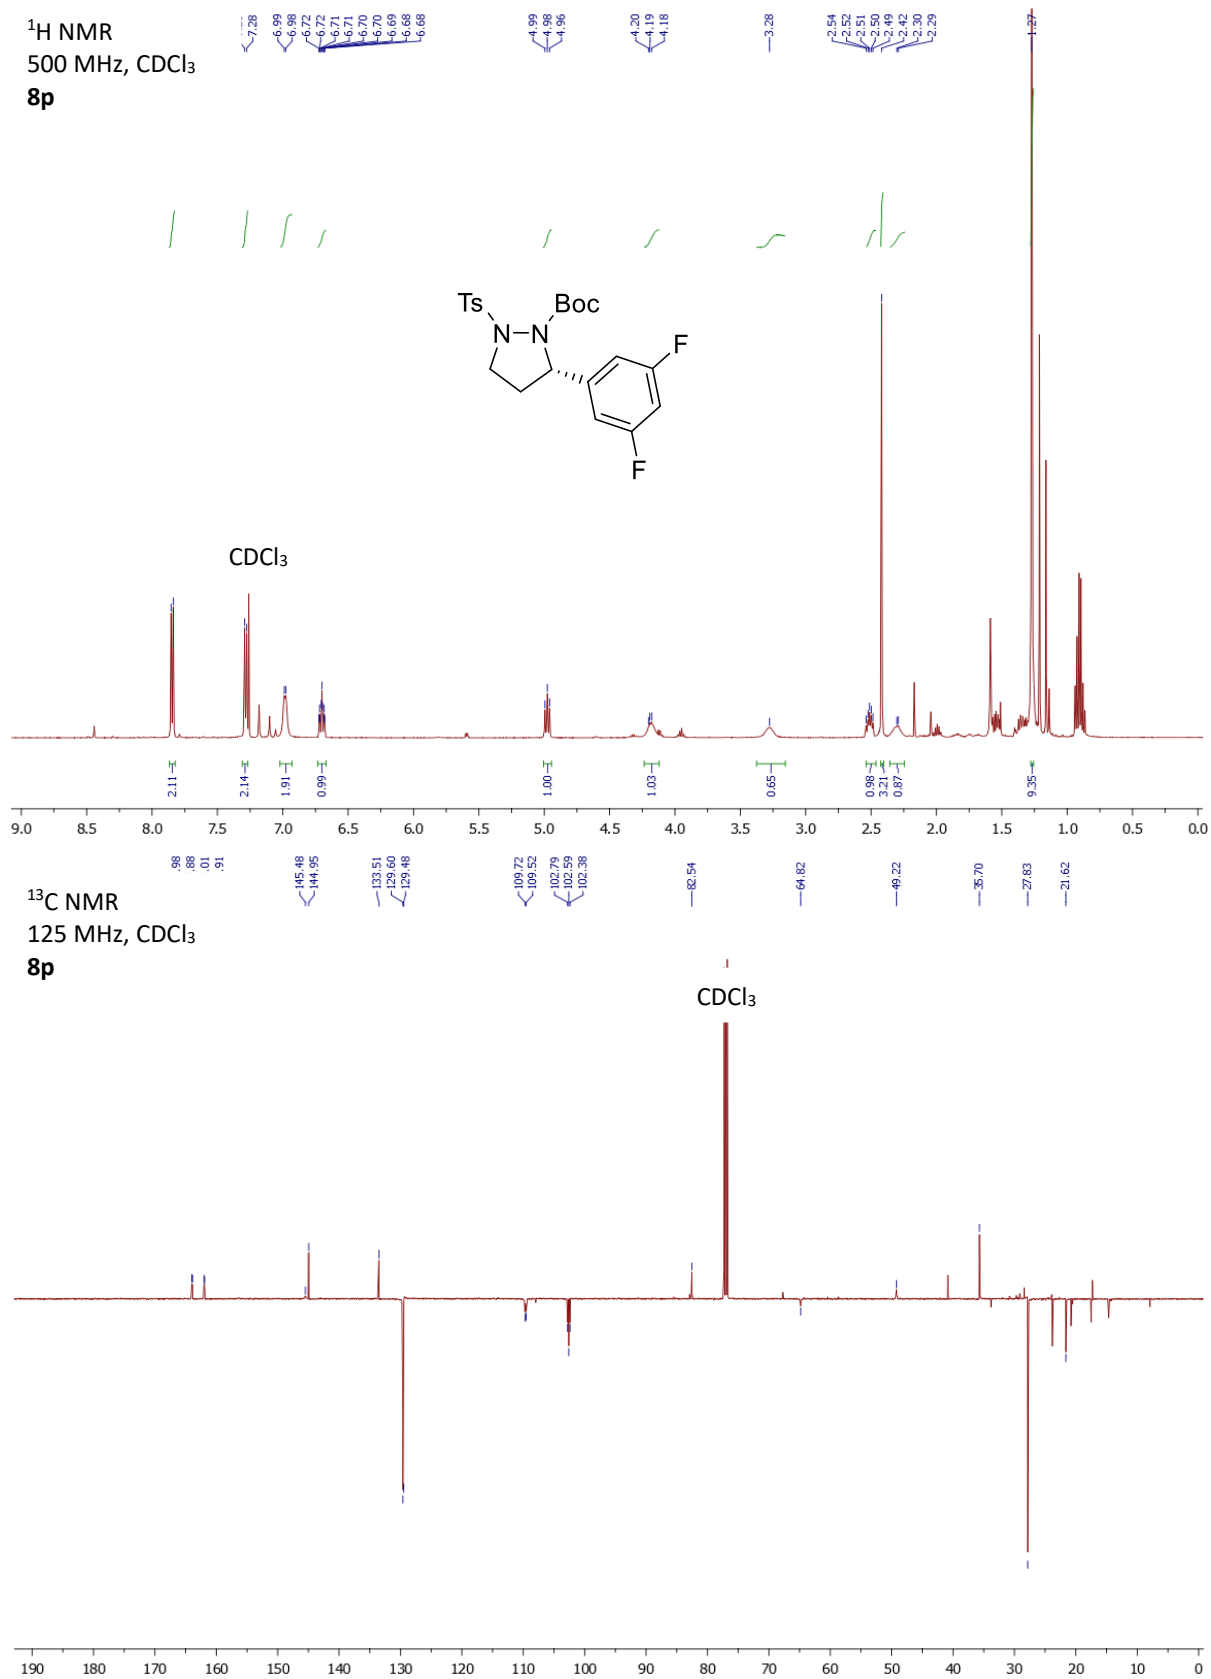

<sup>1</sup>H NMR  
400 MHz, CDCl<sub>3</sub>  
**8q**

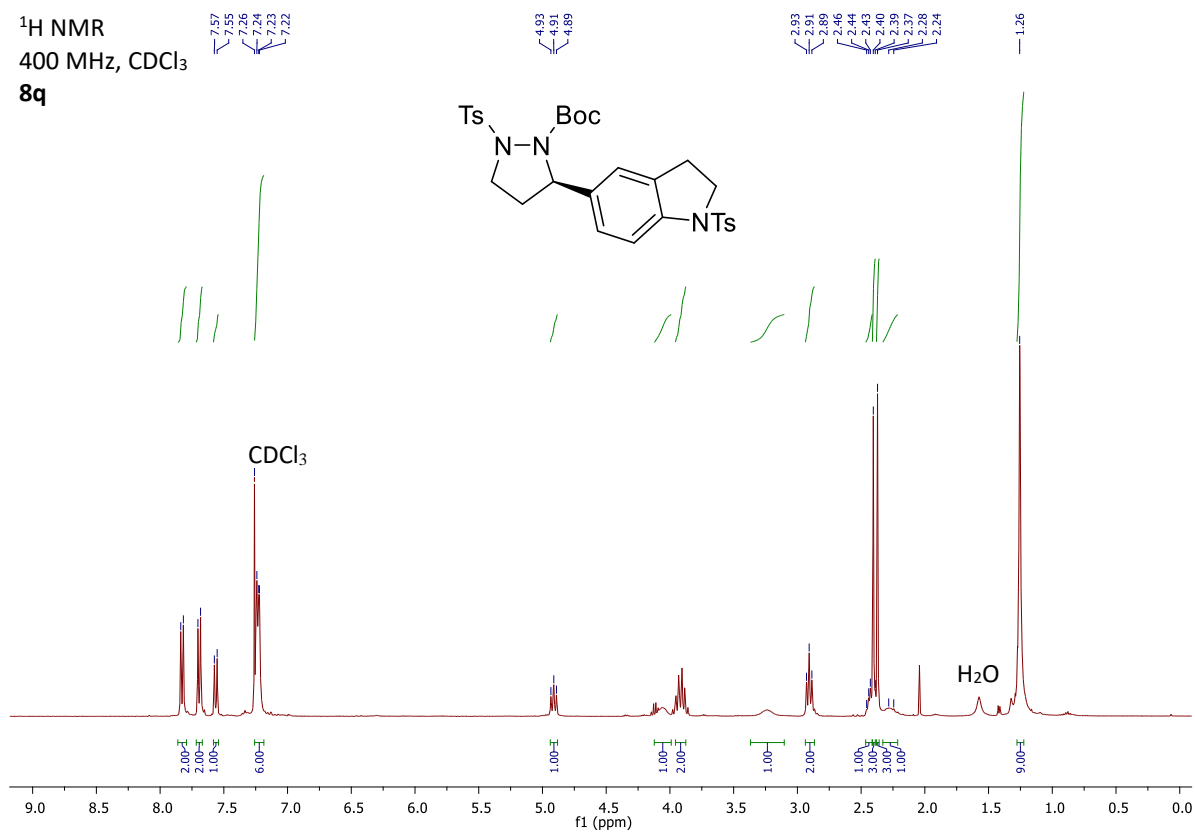

<sup>13</sup>C NMR  
151 MHz, CDCl<sub>3</sub>  
**8q**

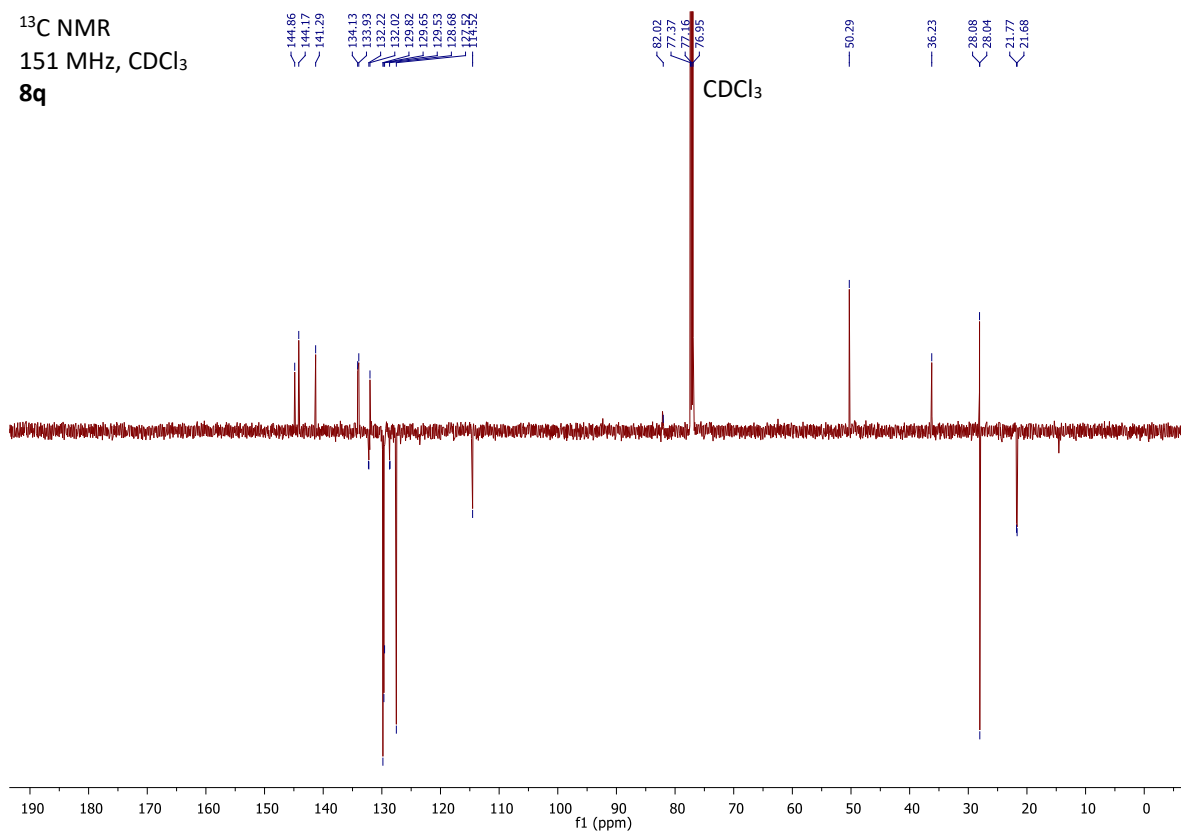

<sup>1</sup>H NMR  
500 MHz, CDCl<sub>3</sub>  
**8r**

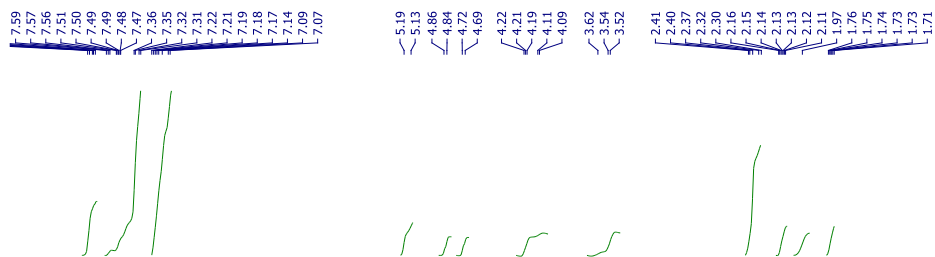

CDCl<sub>3</sub>

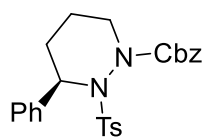

H<sub>2</sub>O

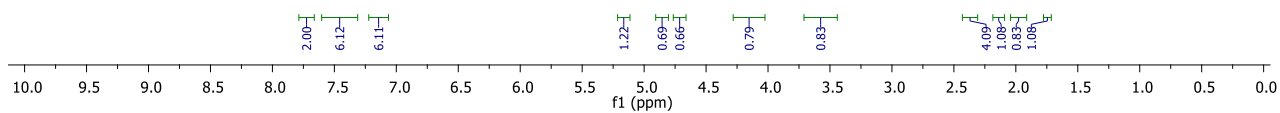

<sup>13</sup>C NMR  
125 MHz, CDCl<sub>3</sub>  
**8r**

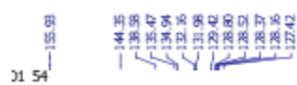

CDCl<sub>3</sub>

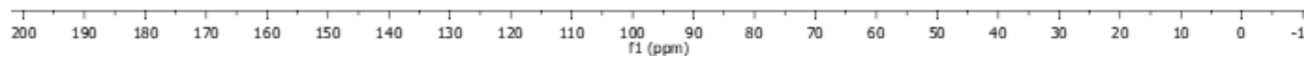

<sup>1</sup>H NMR  
500 MHz, CDCl<sub>3</sub>  
**8s**

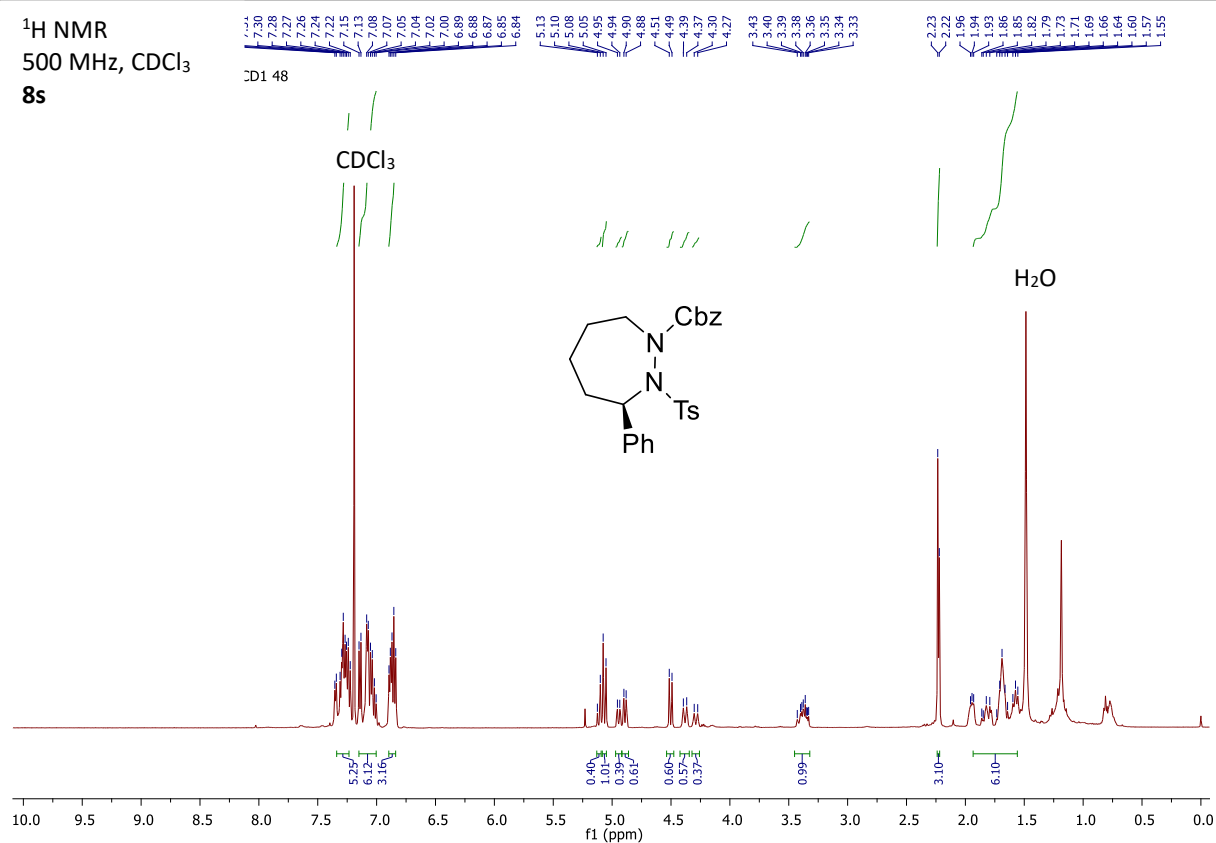

<sup>13</sup>C NMR  
125 MHz, CDCl<sub>3</sub>  
**8s**

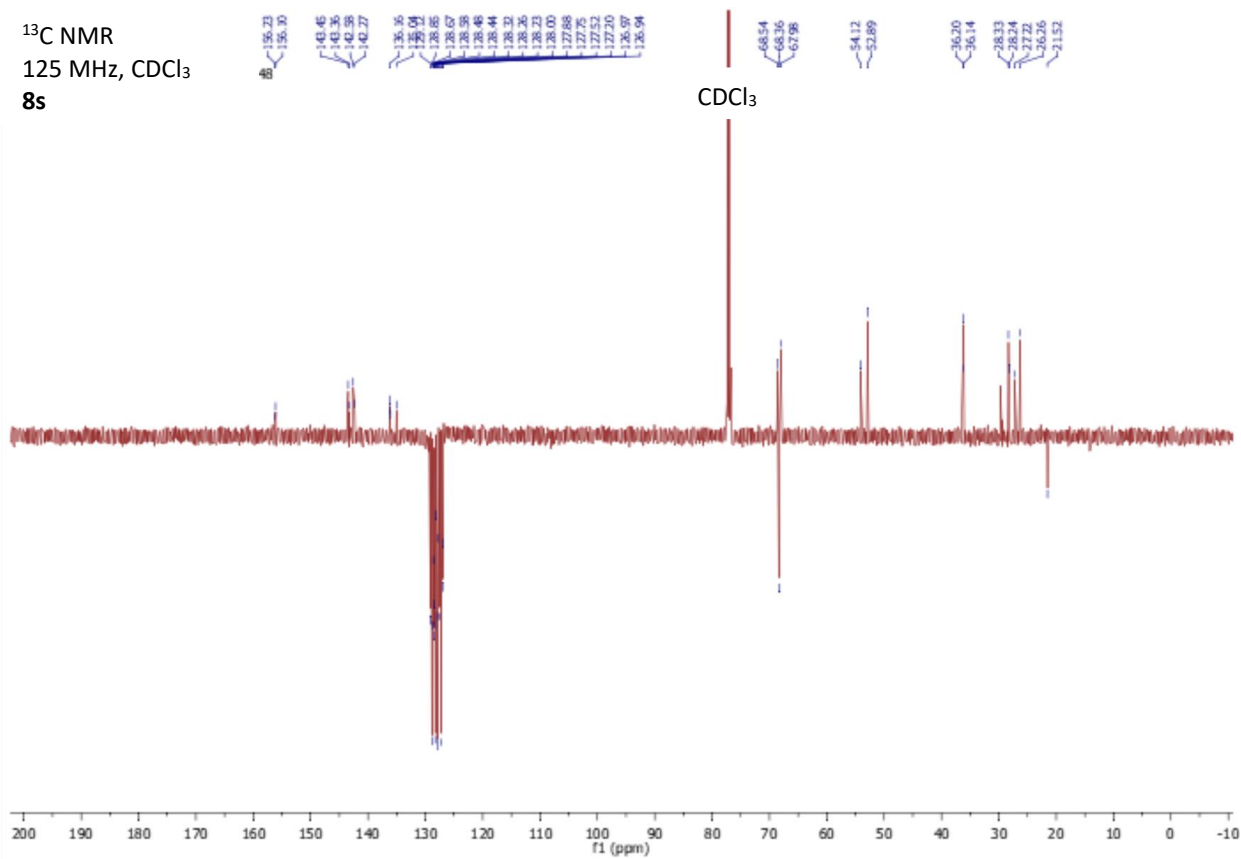

<sup>1</sup>H NMR  
400 MHz, CDCl<sub>3</sub>  
**8t**

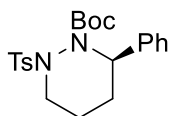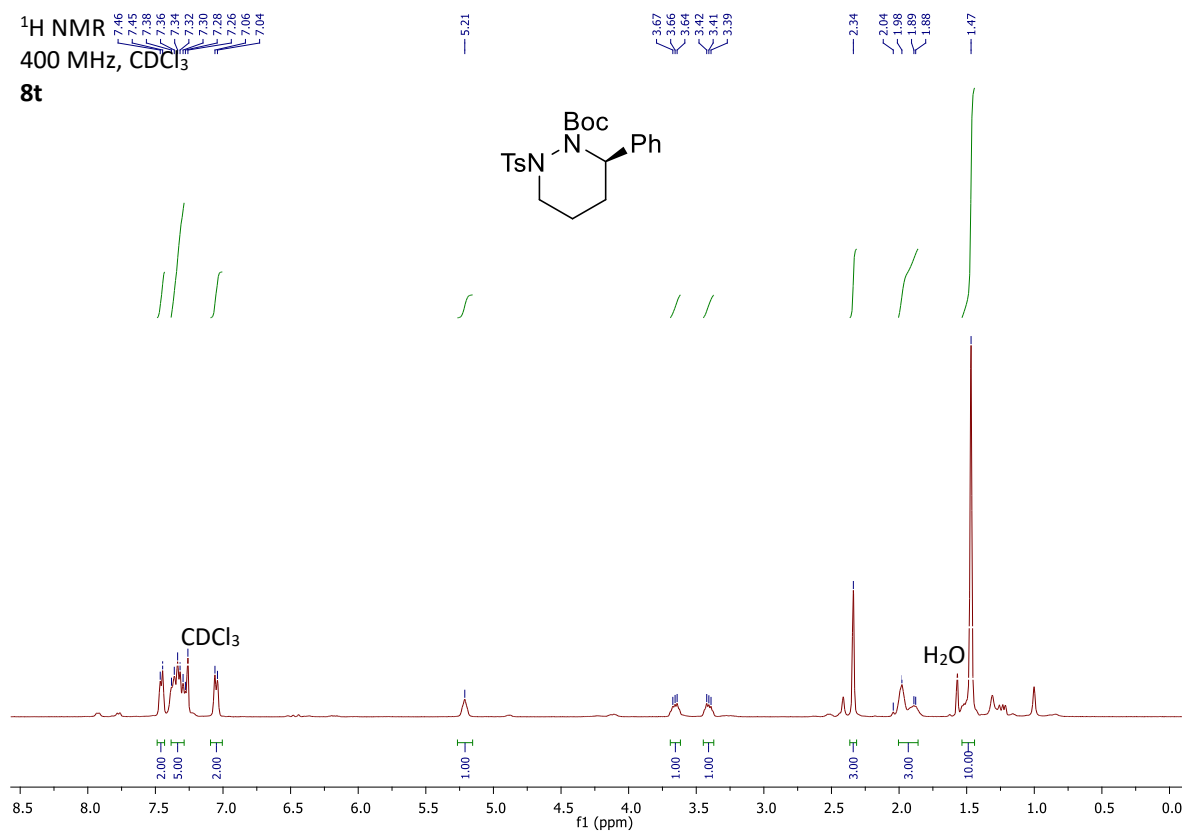

<sup>13</sup>C NMR  
125 MHz, CDCl<sub>3</sub>  
**8t**

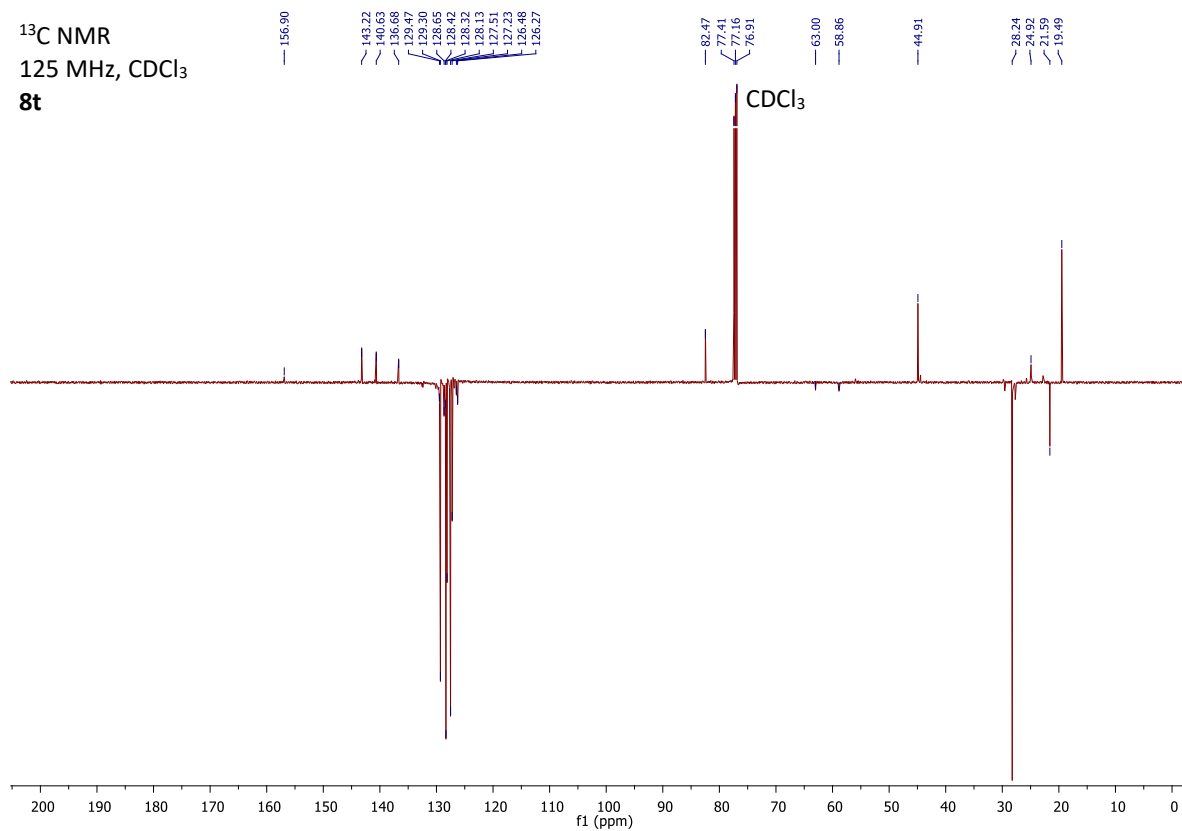

<sup>1</sup>H NMR

400 MHz, CDCl<sub>3</sub>

8u

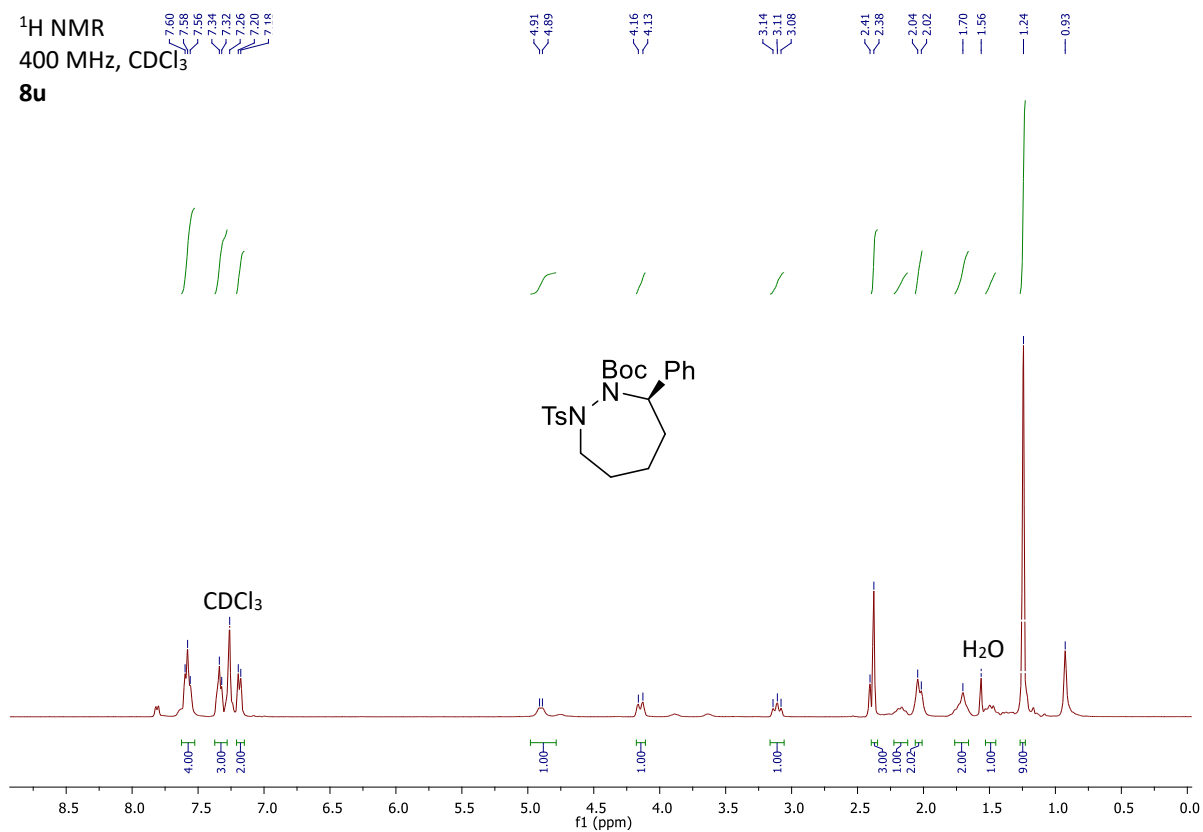

<sup>13</sup>C NMR

125 MHz, CDCl<sub>3</sub>

8u

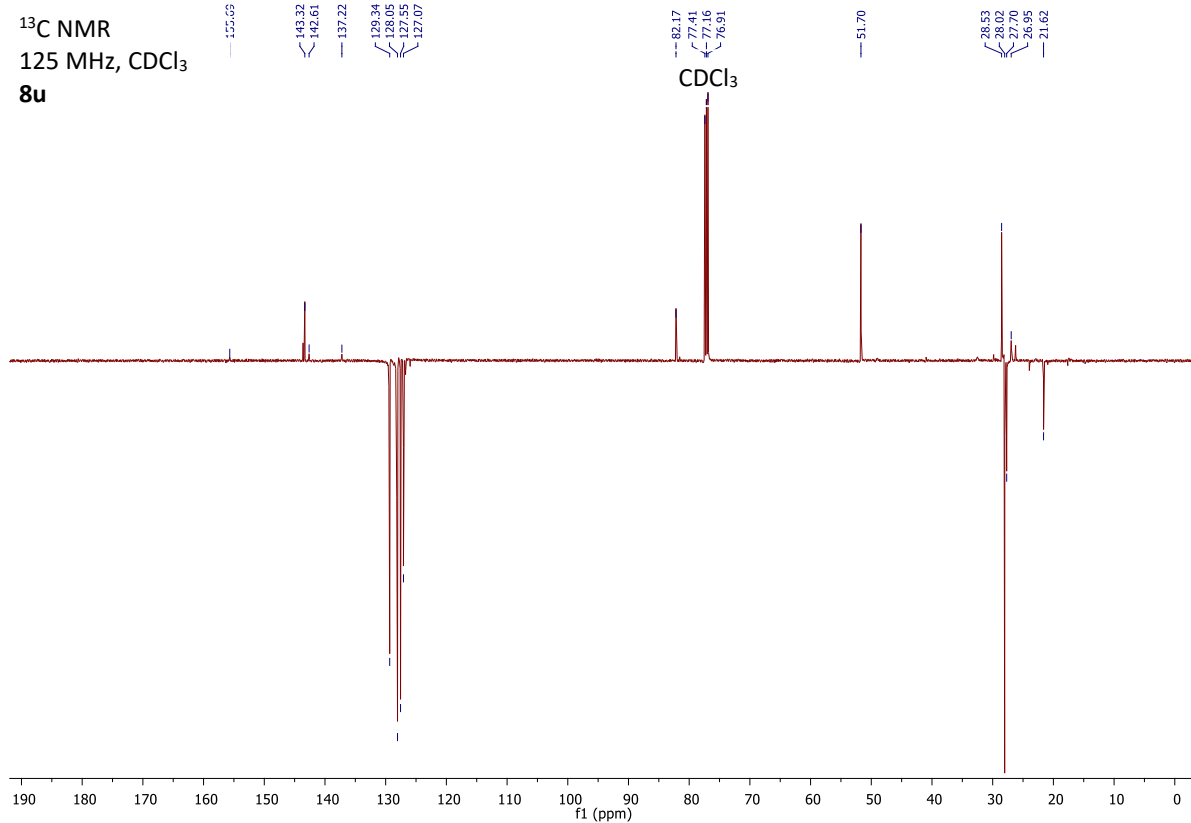



<sup>1</sup>H NMR  
500 MHz, CDCl<sub>3</sub> **8v**

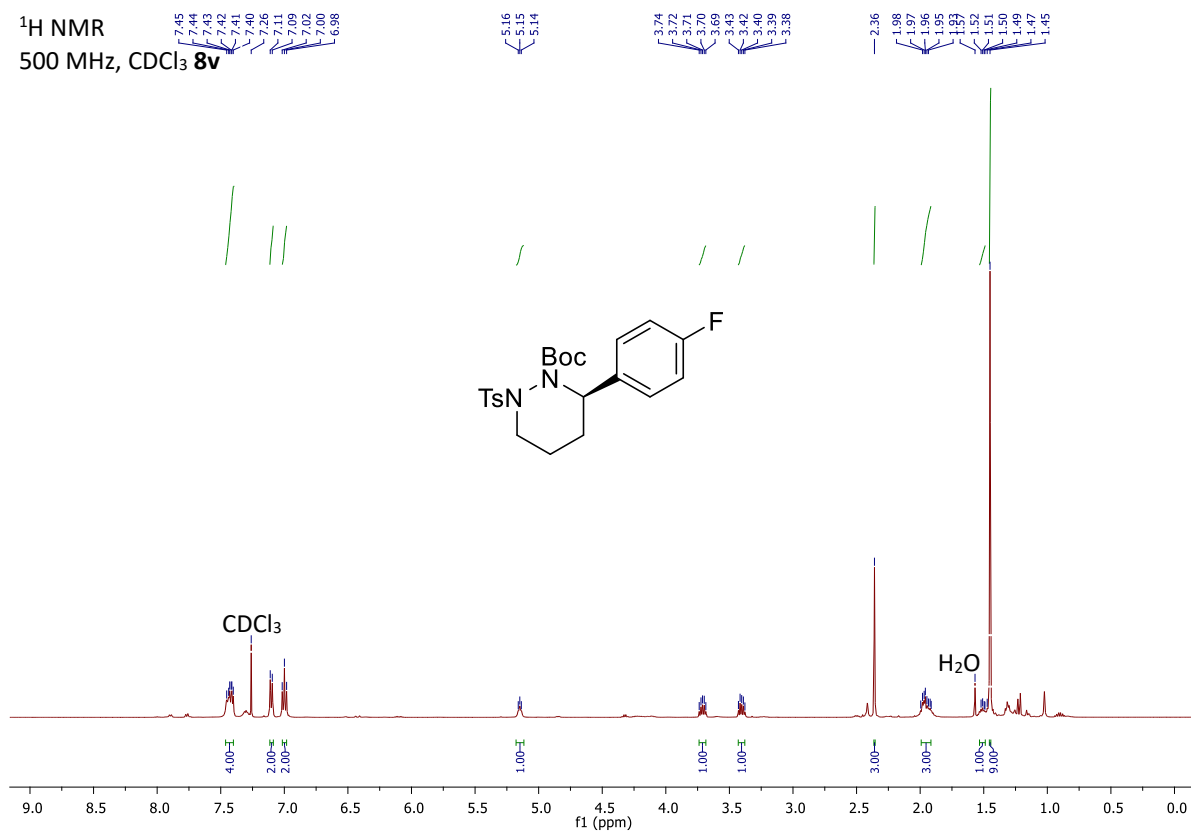

<sup>13</sup>C NMR  
125 MHz, CDCl<sub>3</sub> **8v**

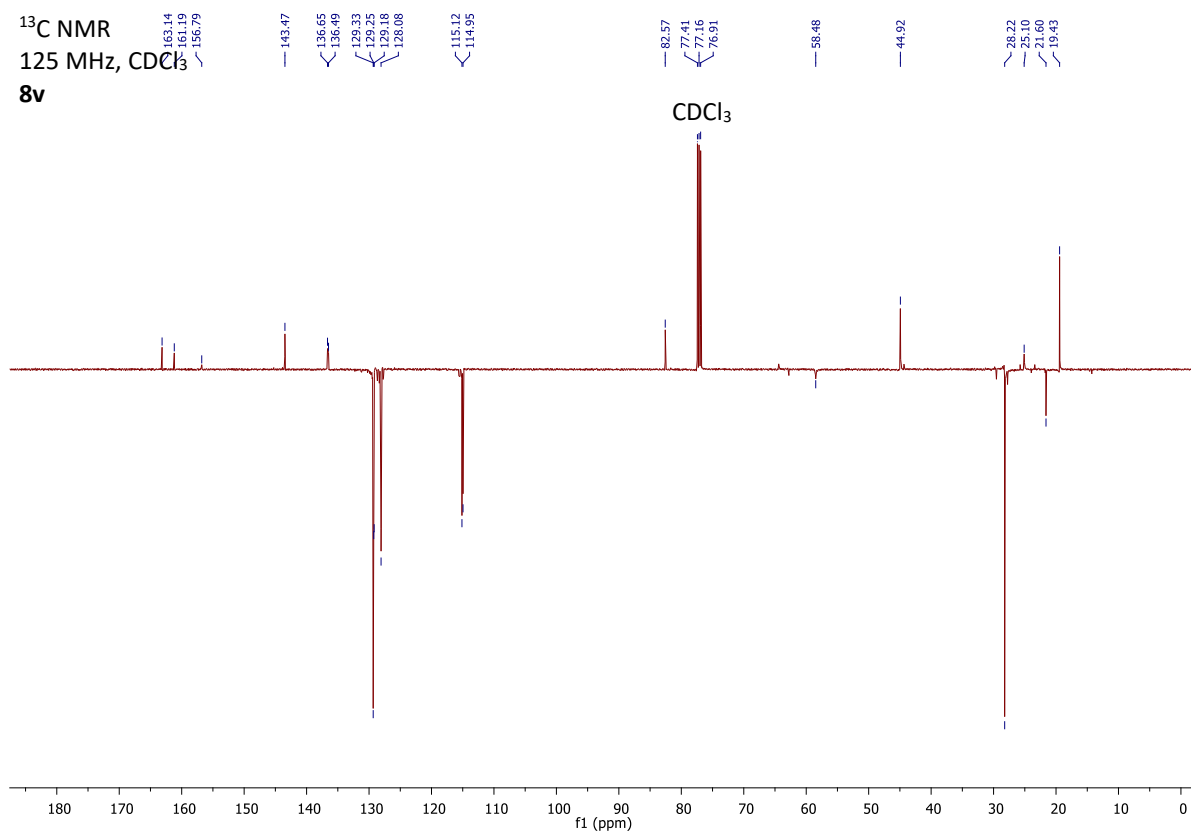

<sup>1</sup>H NMR  
400 MHz, CDCl<sub>3</sub>  
**9b**

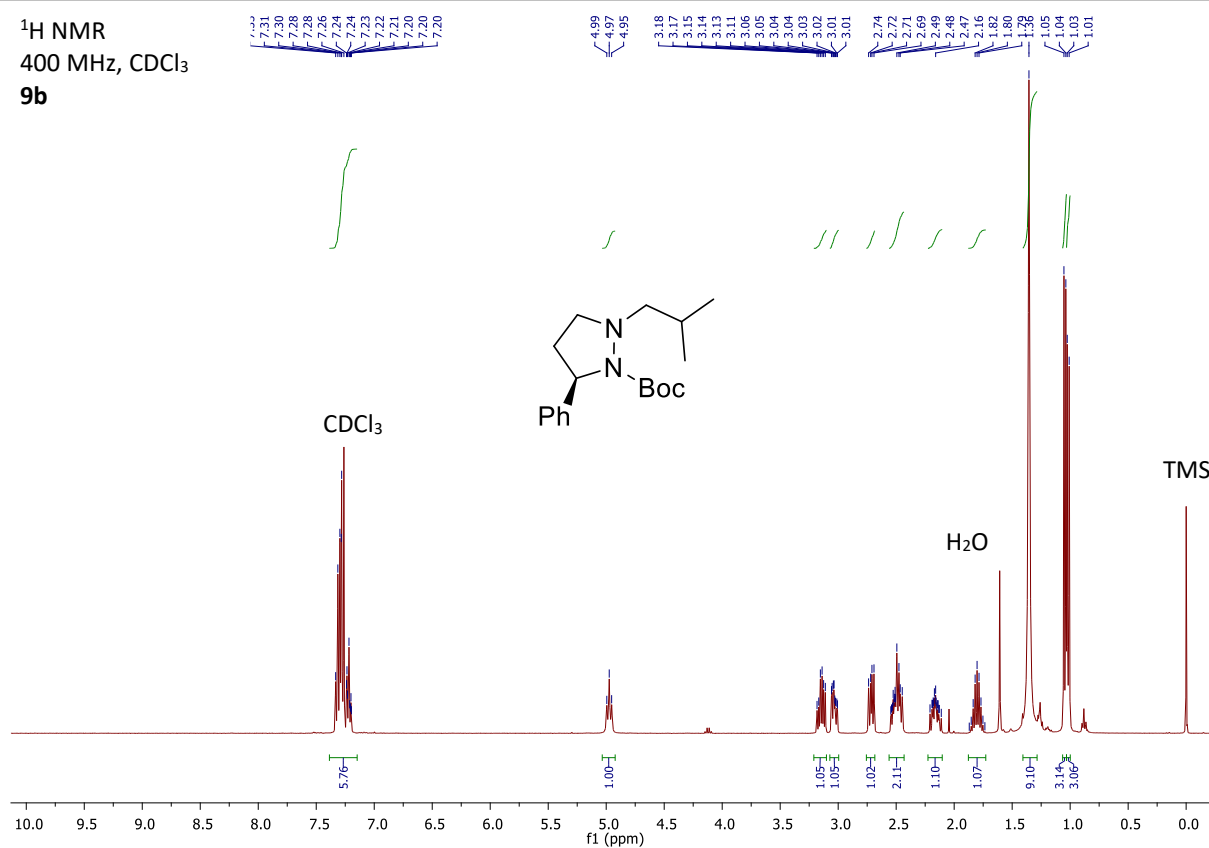

<sup>13</sup>C NMR  
100 MHz, CDCl<sub>3</sub>  
**9b**

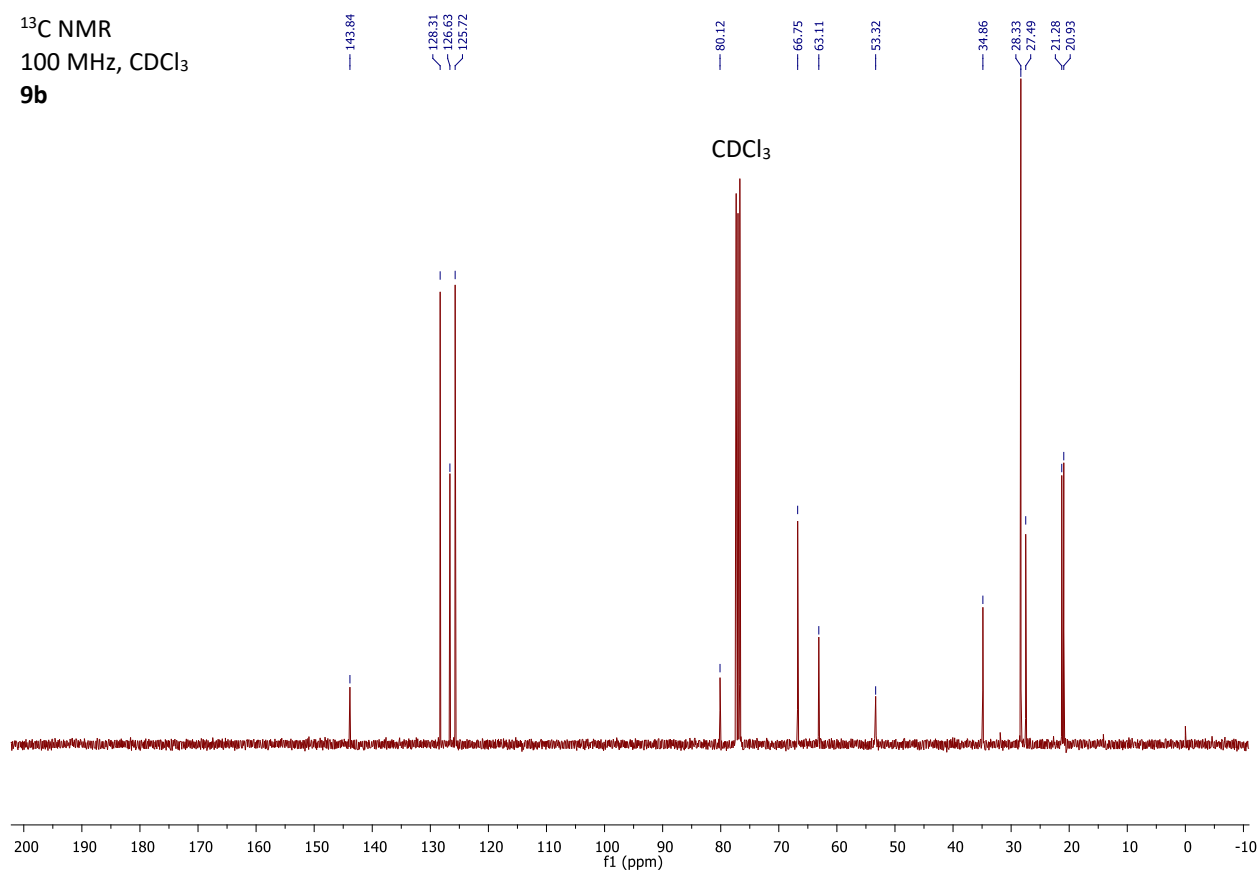

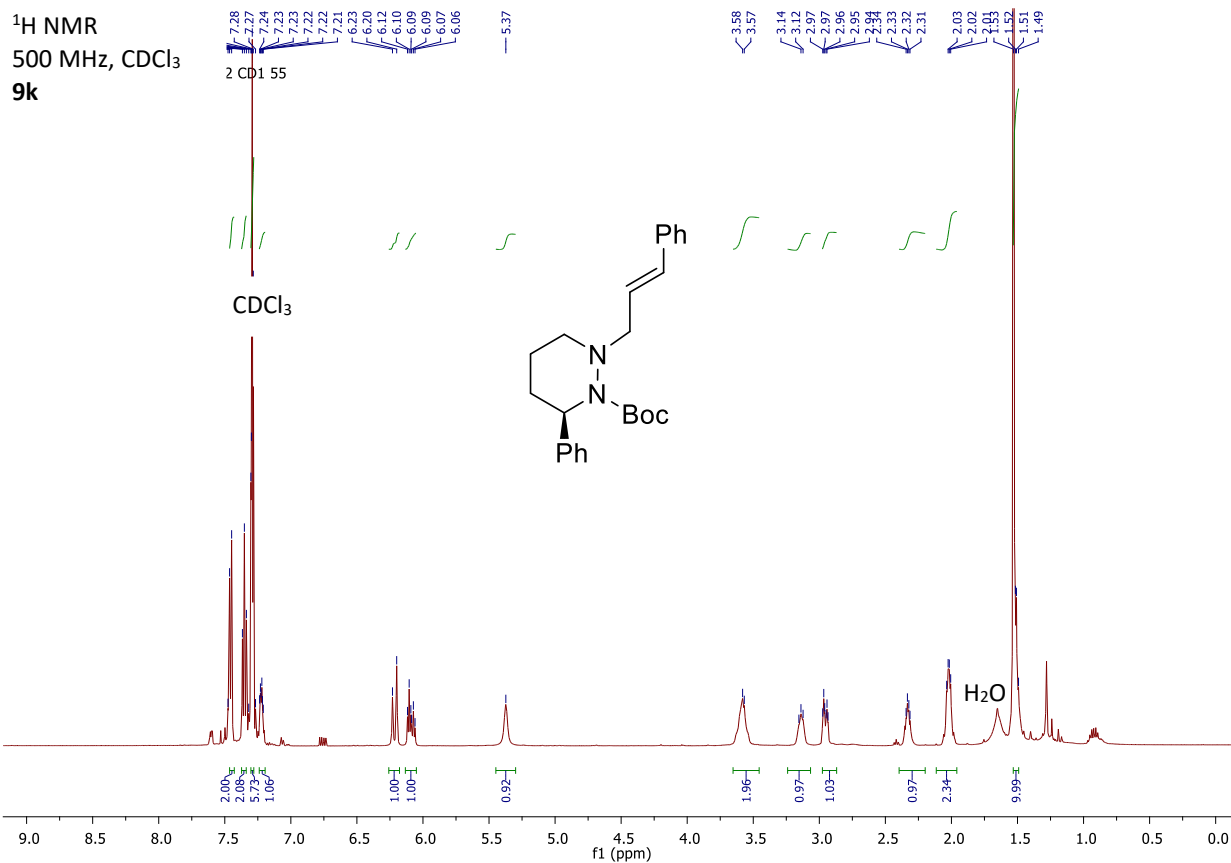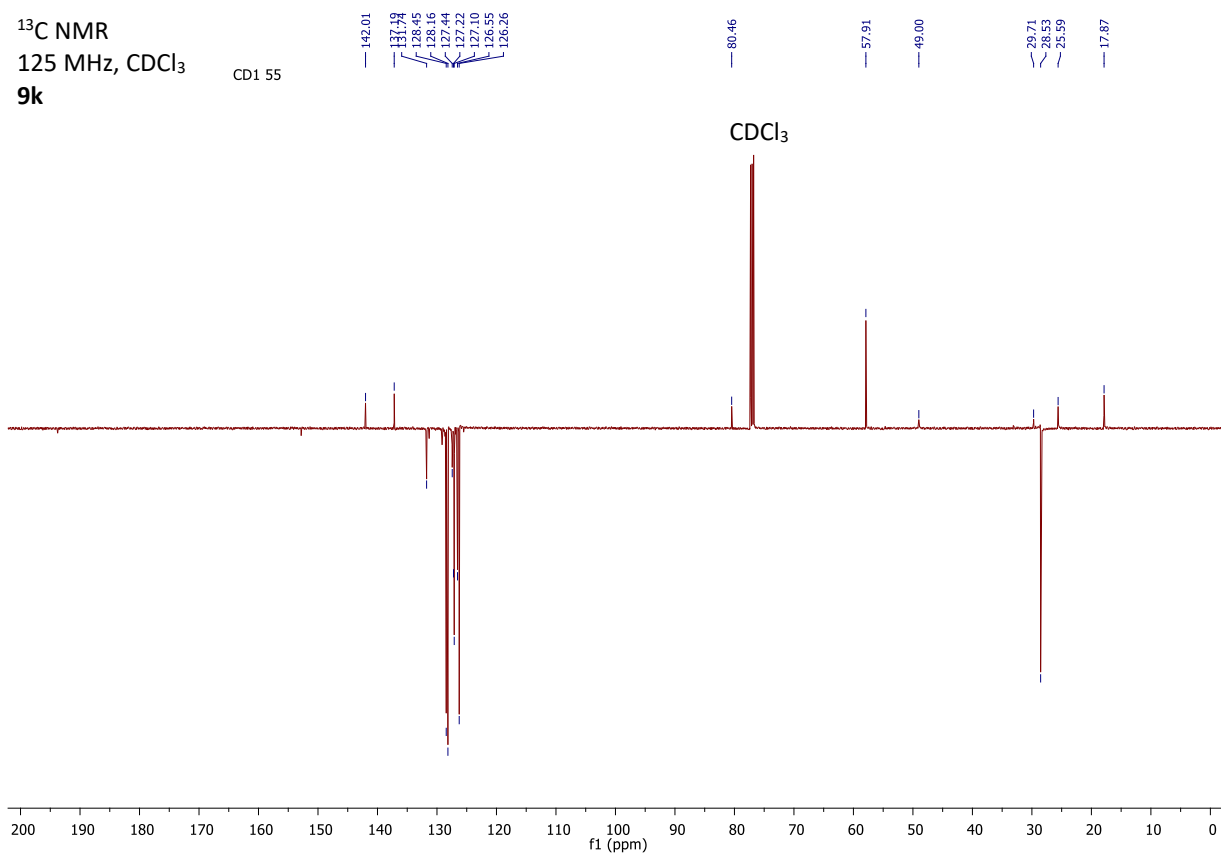

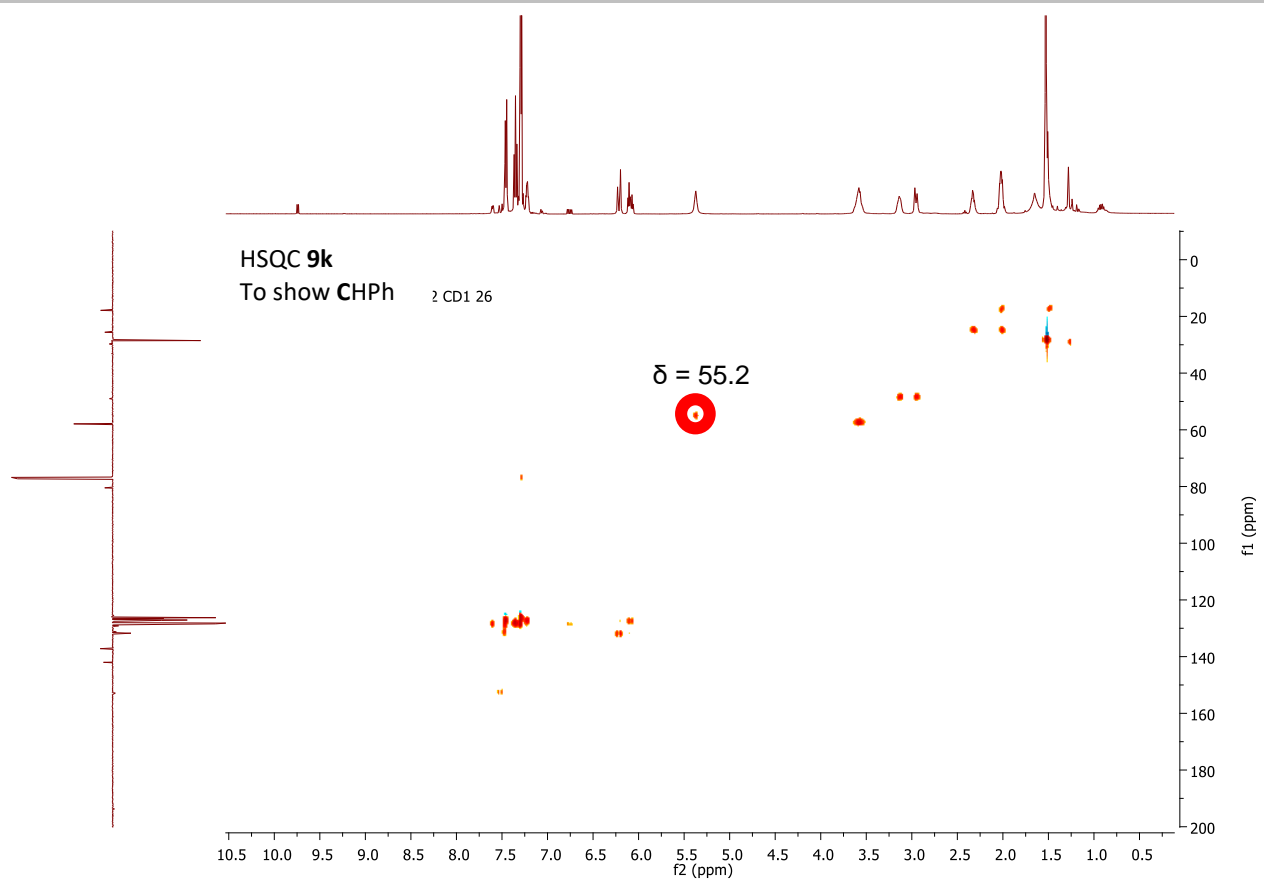

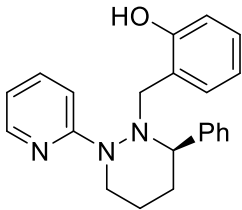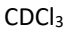

<sup>1</sup>H NMR  
400 MHz, CDCl<sub>3</sub>  
**9o**

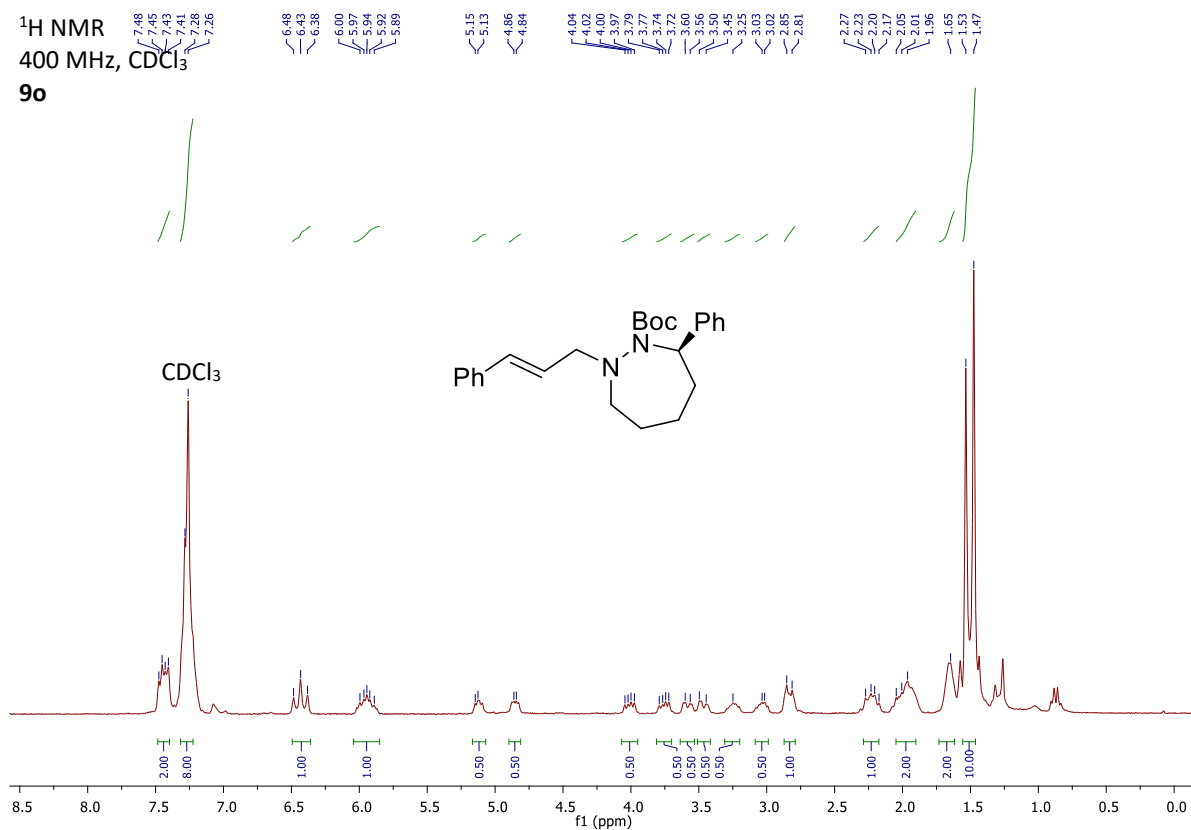

<sup>13</sup>C NMR  
125 MHz, CDCl<sub>3</sub>  
**9o**

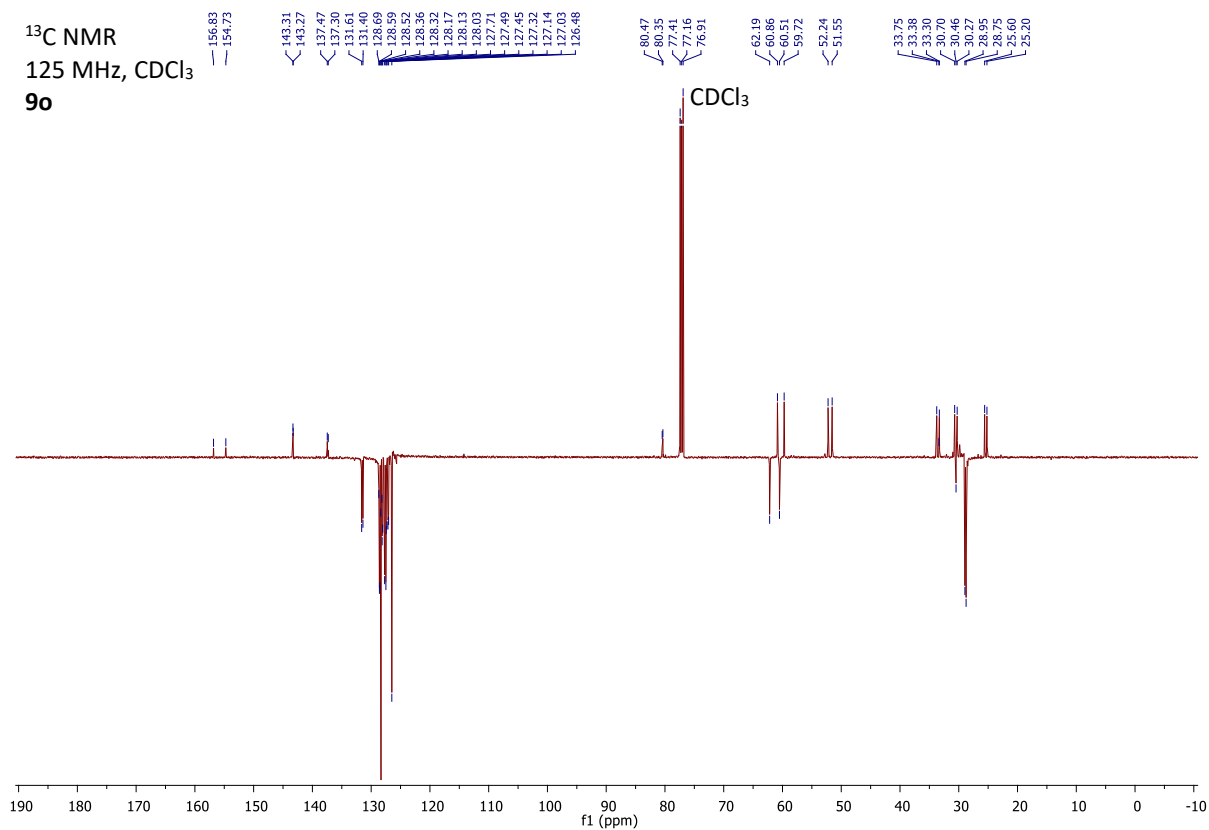

<sup>1</sup>H NMR  
500 MHz, CDCl<sub>3</sub>  
**9a**

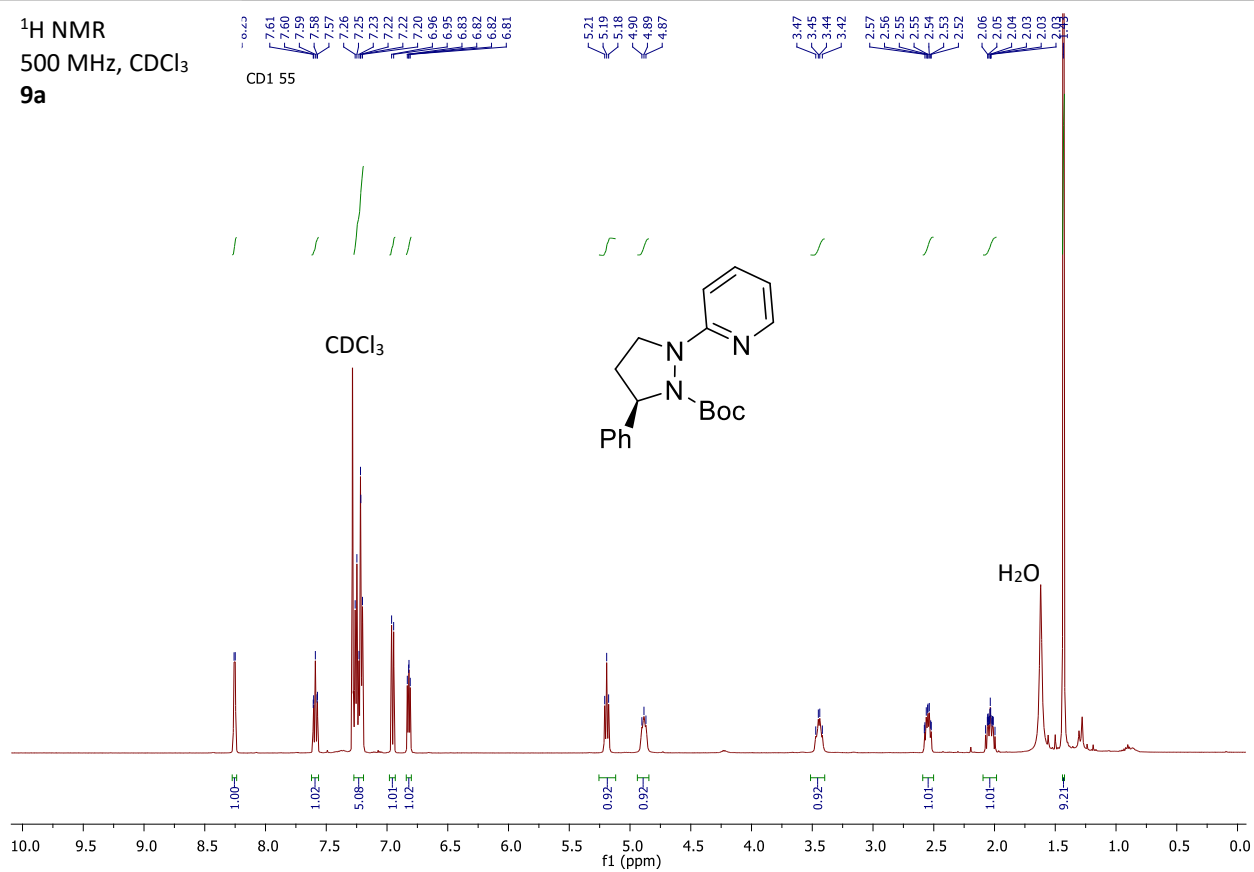

<sup>13</sup>C NMR  
125 MHz, CDCl<sub>3</sub>  
**9a**

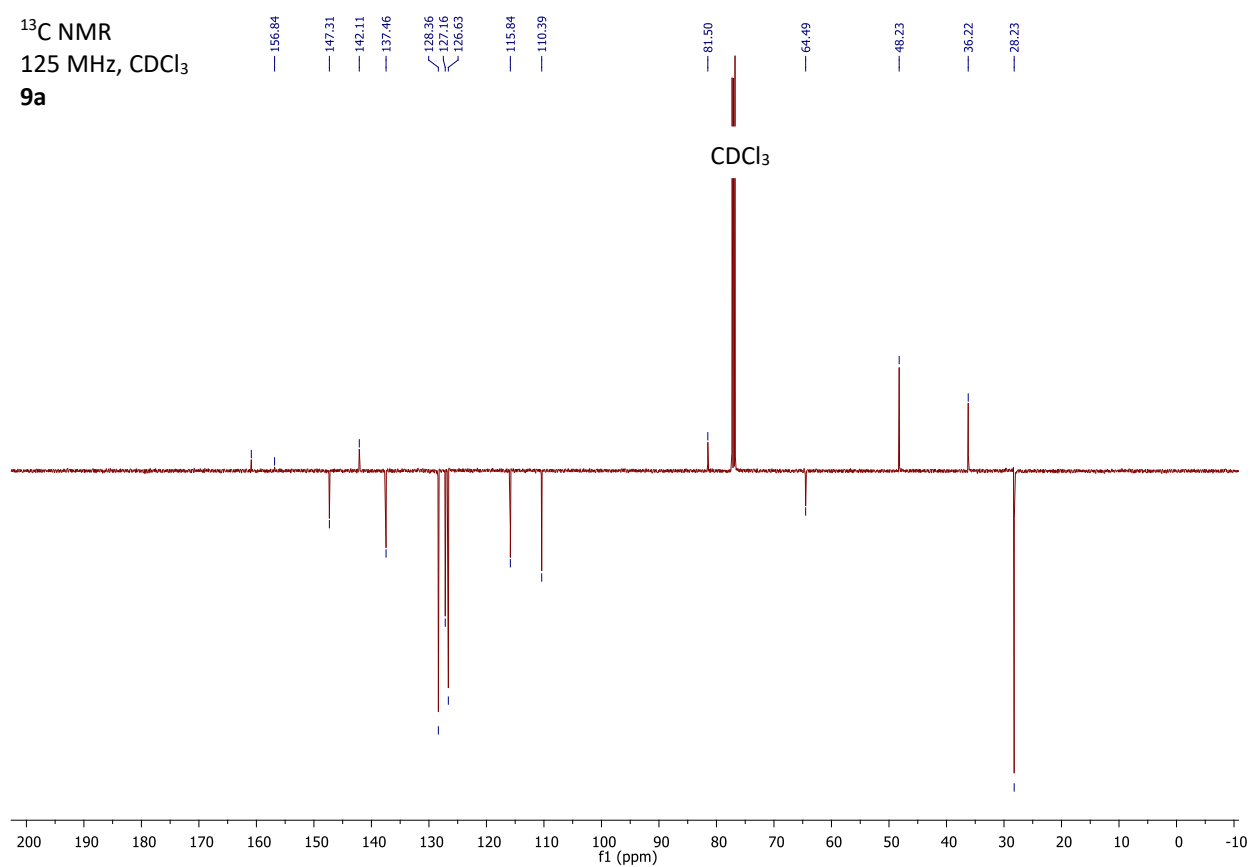

<sup>1</sup>H NMR  
500 MHz, CDCl<sub>3</sub>  
9c

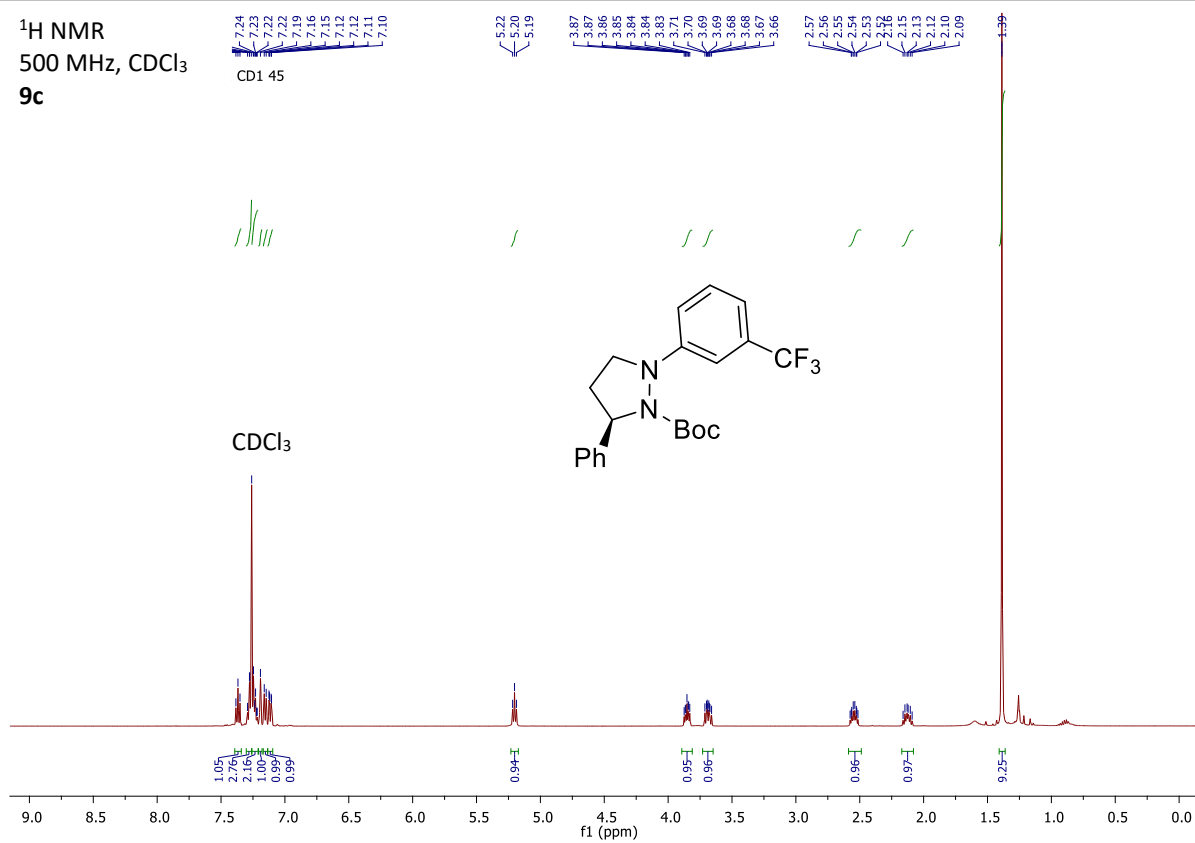

<sup>13</sup>C NMR  
125 MHz, CDCl<sub>3</sub>  
9c

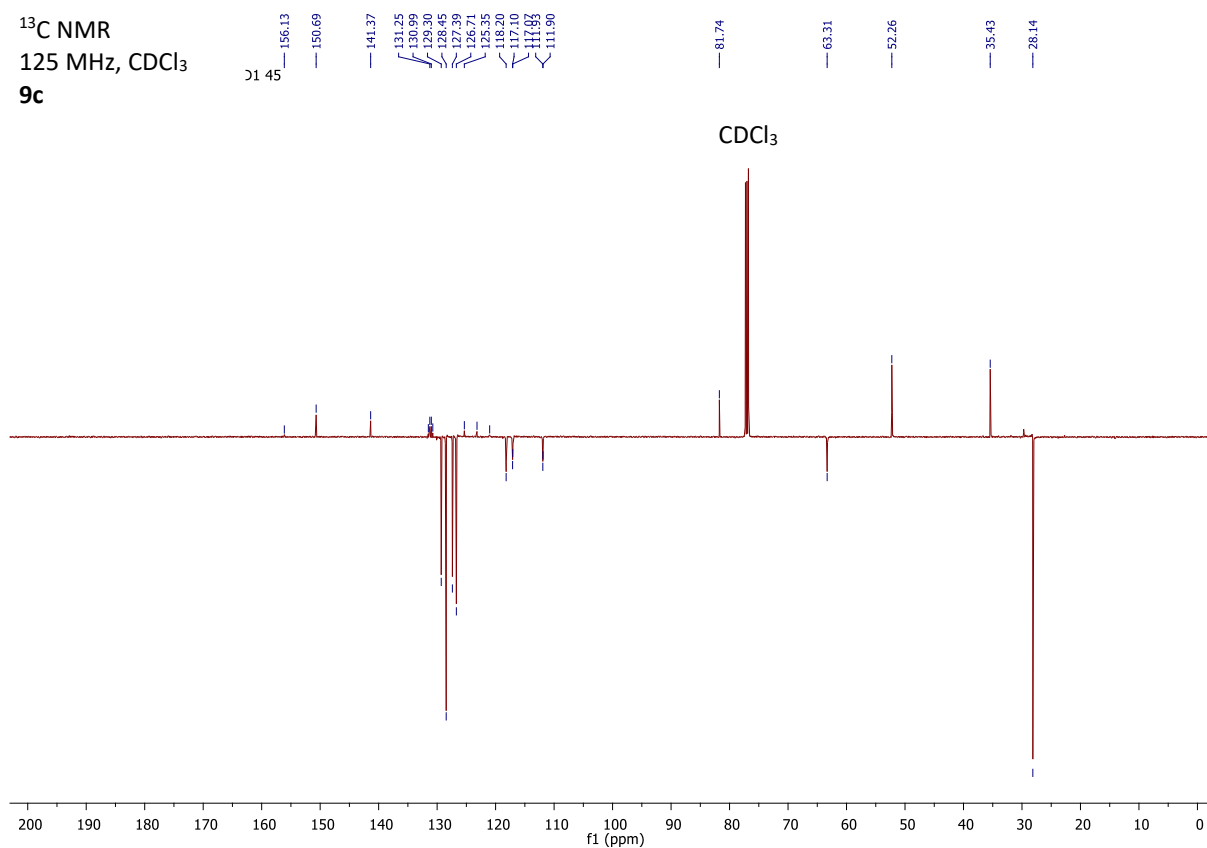



<sup>1</sup>H NMR

400 MHz, CDCl<sub>3</sub>

**9e**

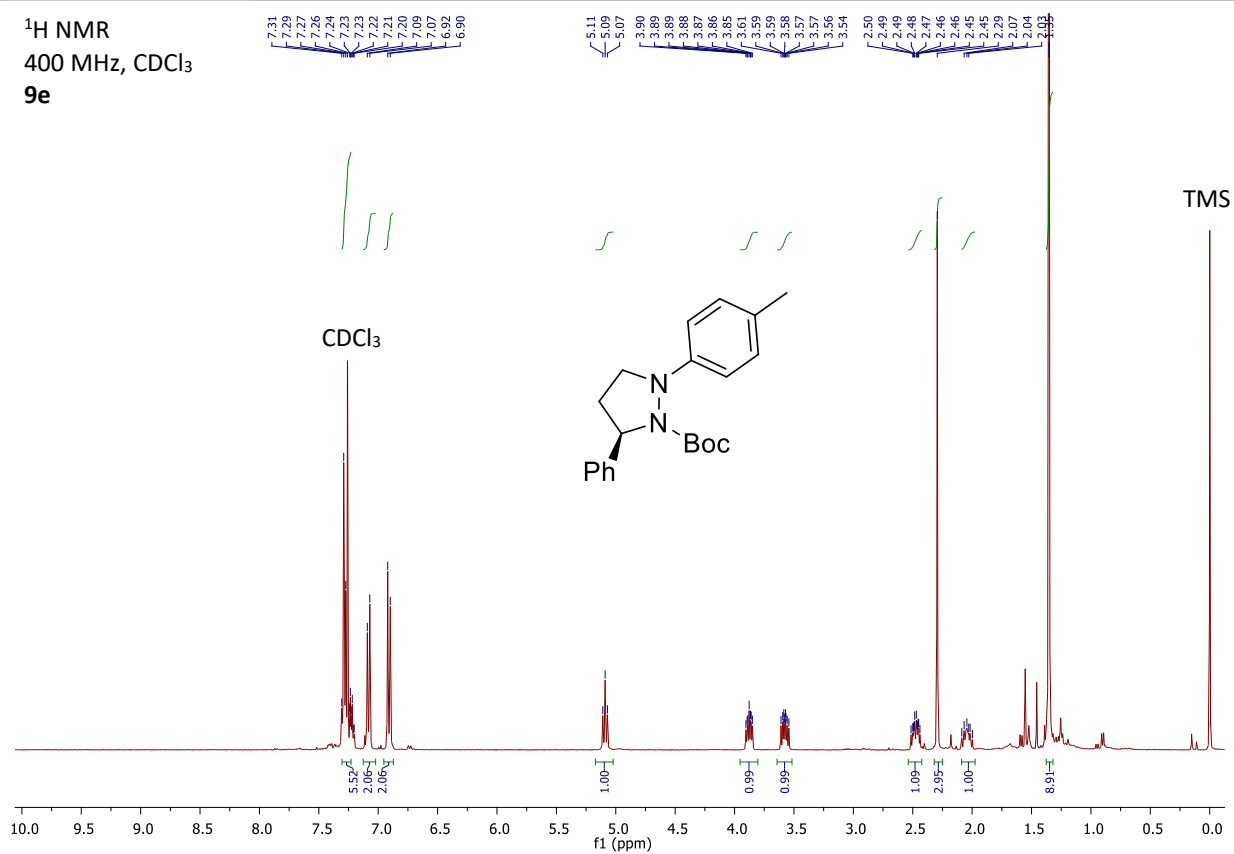

<sup>13</sup>C NMR

100 MHz, CDCl<sub>3</sub>

**9e**

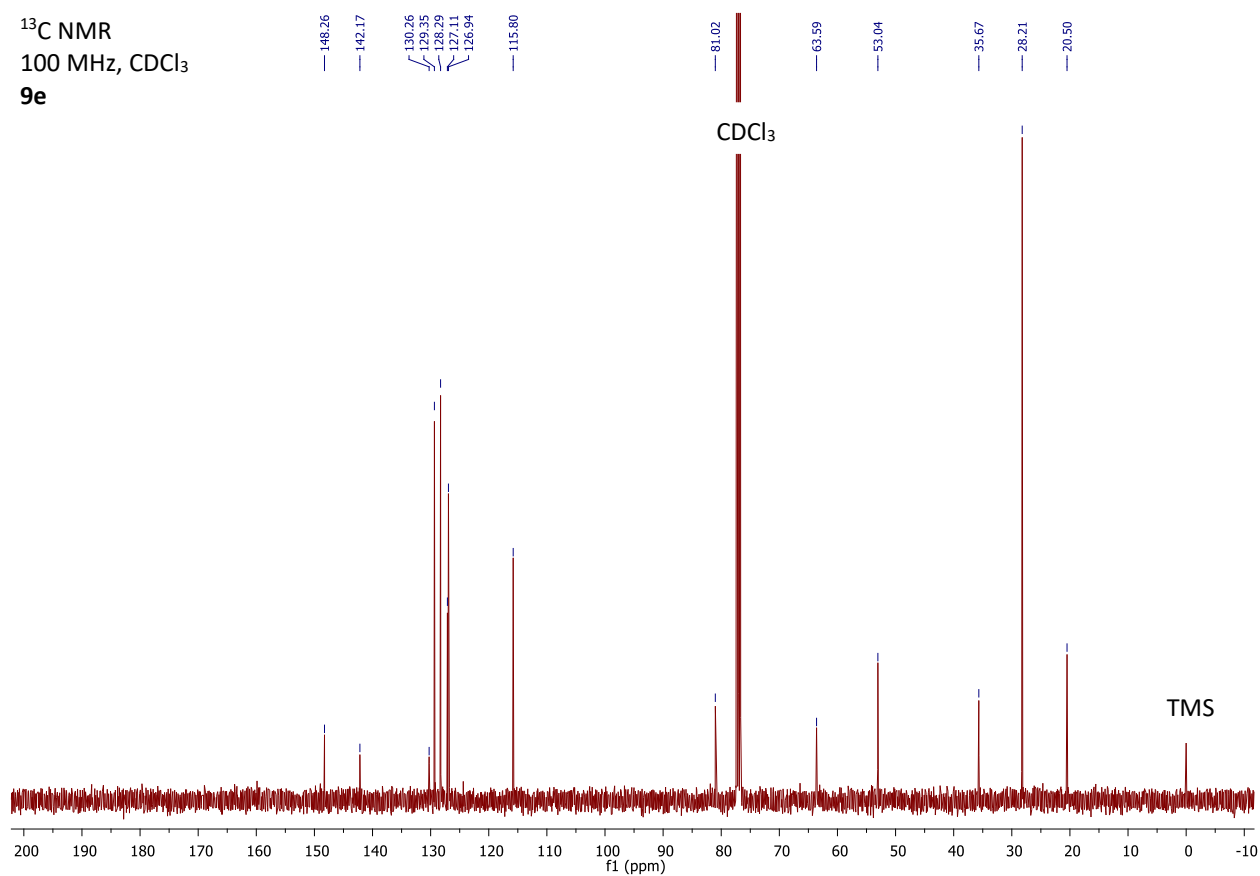

<sup>1</sup>H NMR  
500 MHz, CDCl<sub>3</sub>  
**9f**

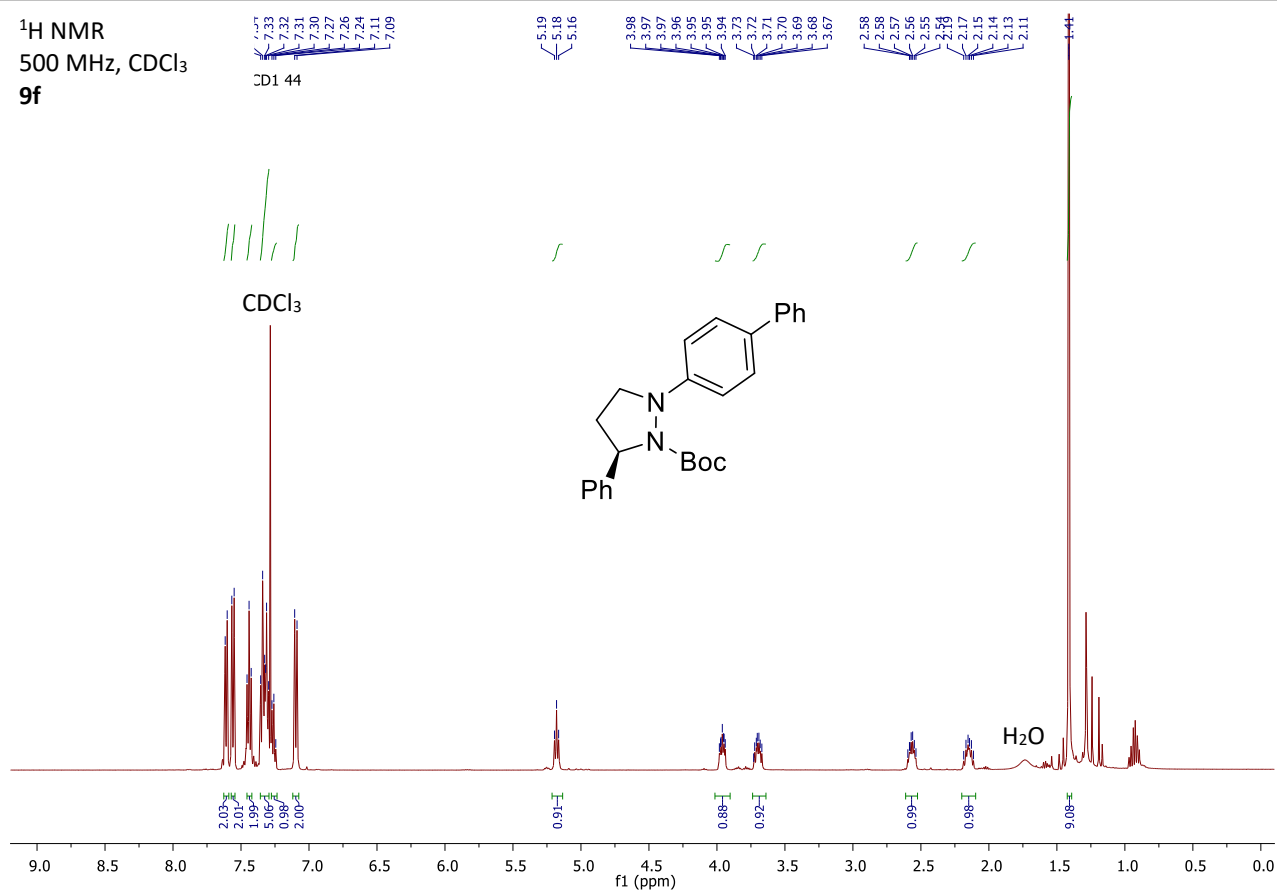

<sup>13</sup>C NMR  
125 MHz, CDCl<sub>3</sub>  
**9f**

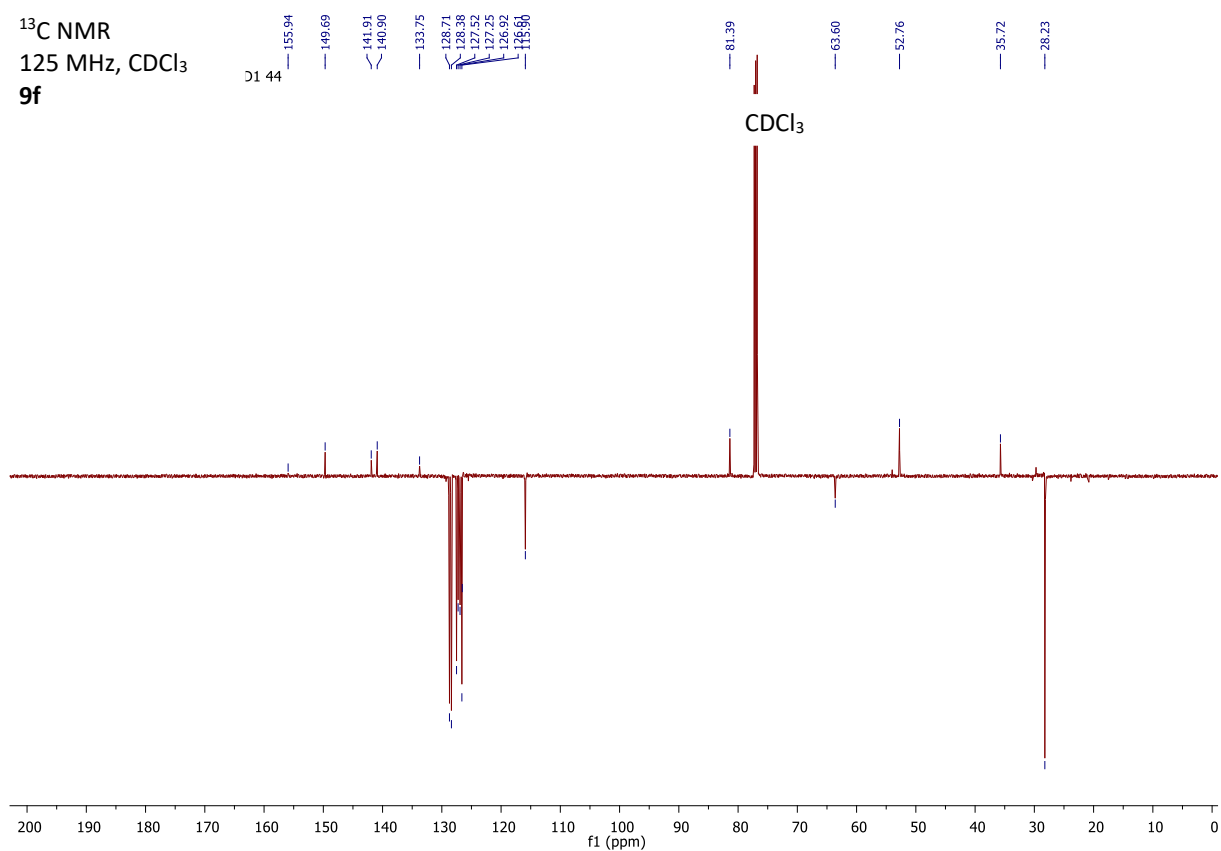

<sup>1</sup>H NMR  
400 MHz, CDCl<sub>3</sub>  
**10a**

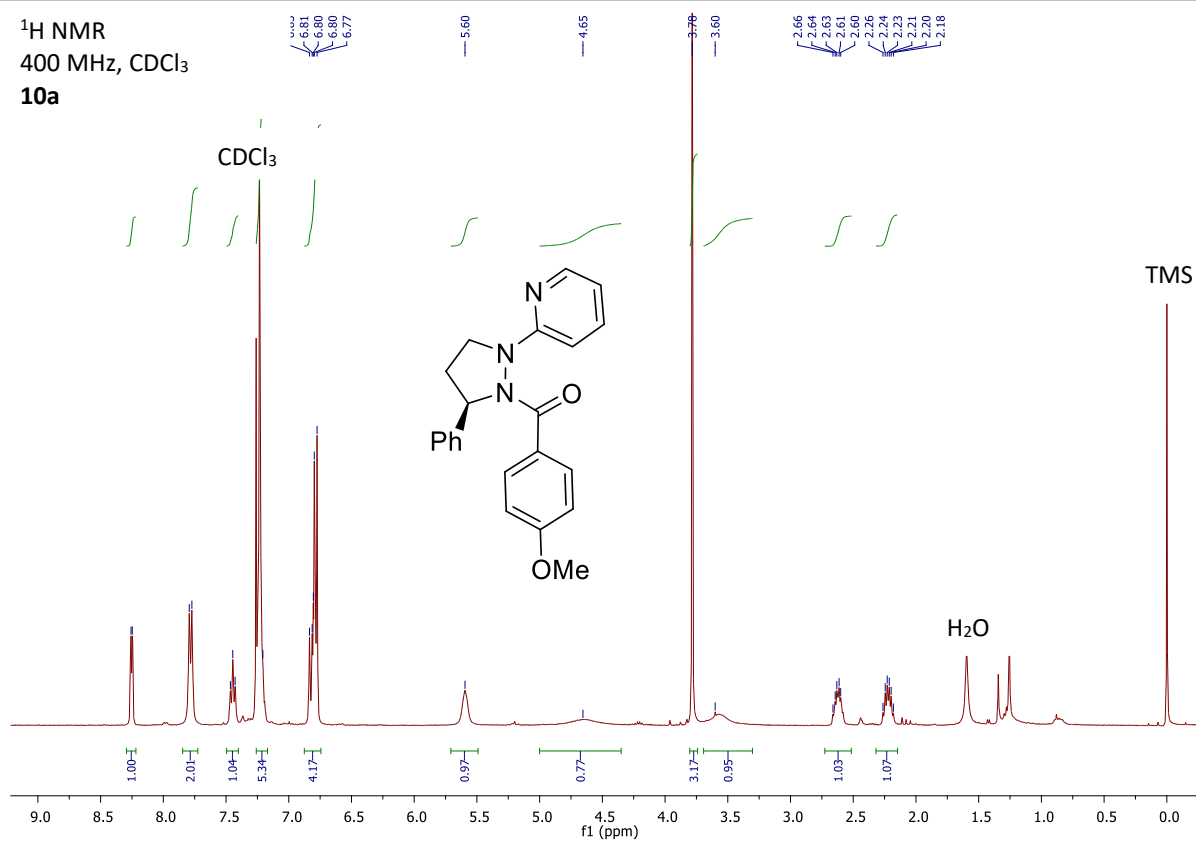

<sup>13</sup>C NMR  
100 MHz, CDCl<sub>3</sub>  
**10a**

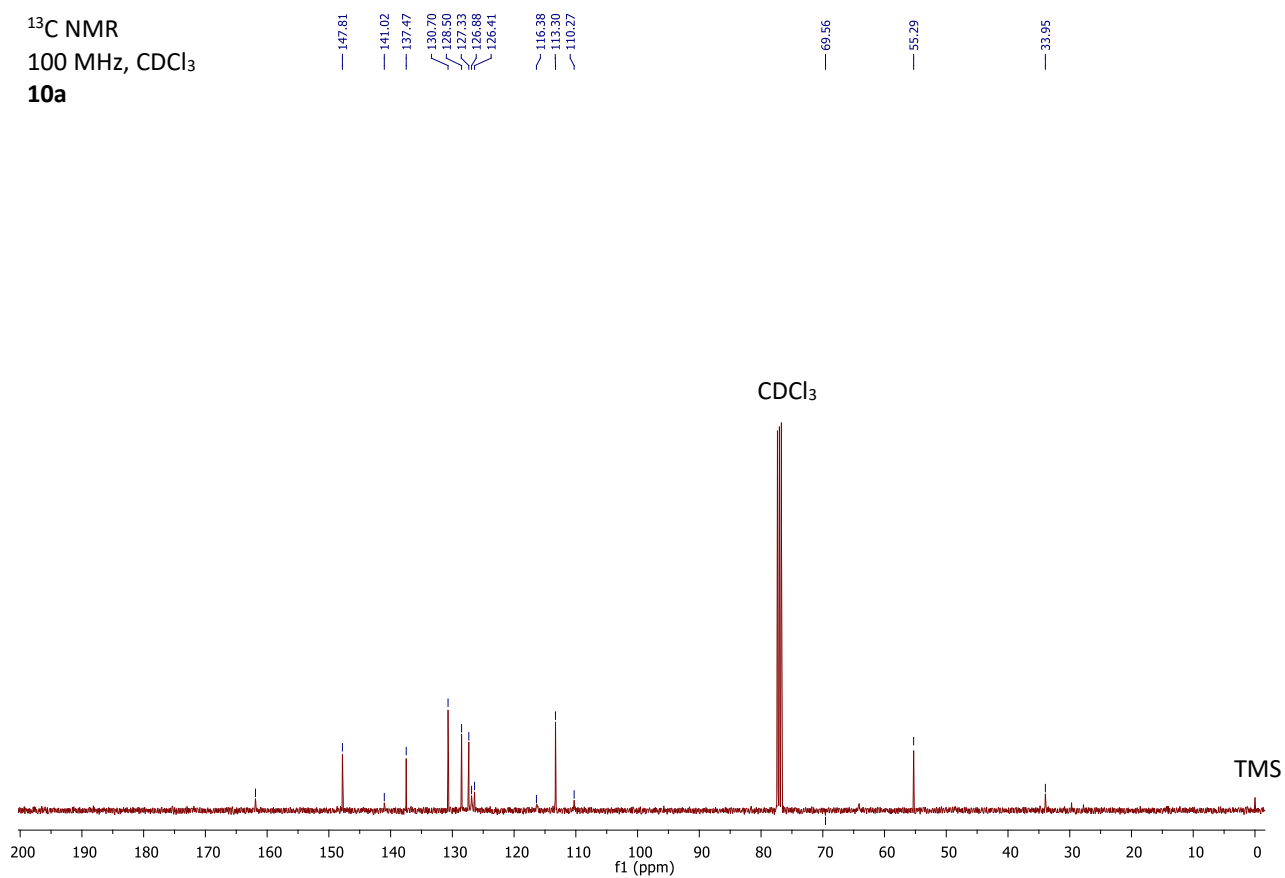

<sup>1</sup>H NMR  
500 MHz, CDCl<sub>3</sub>  
**10b**

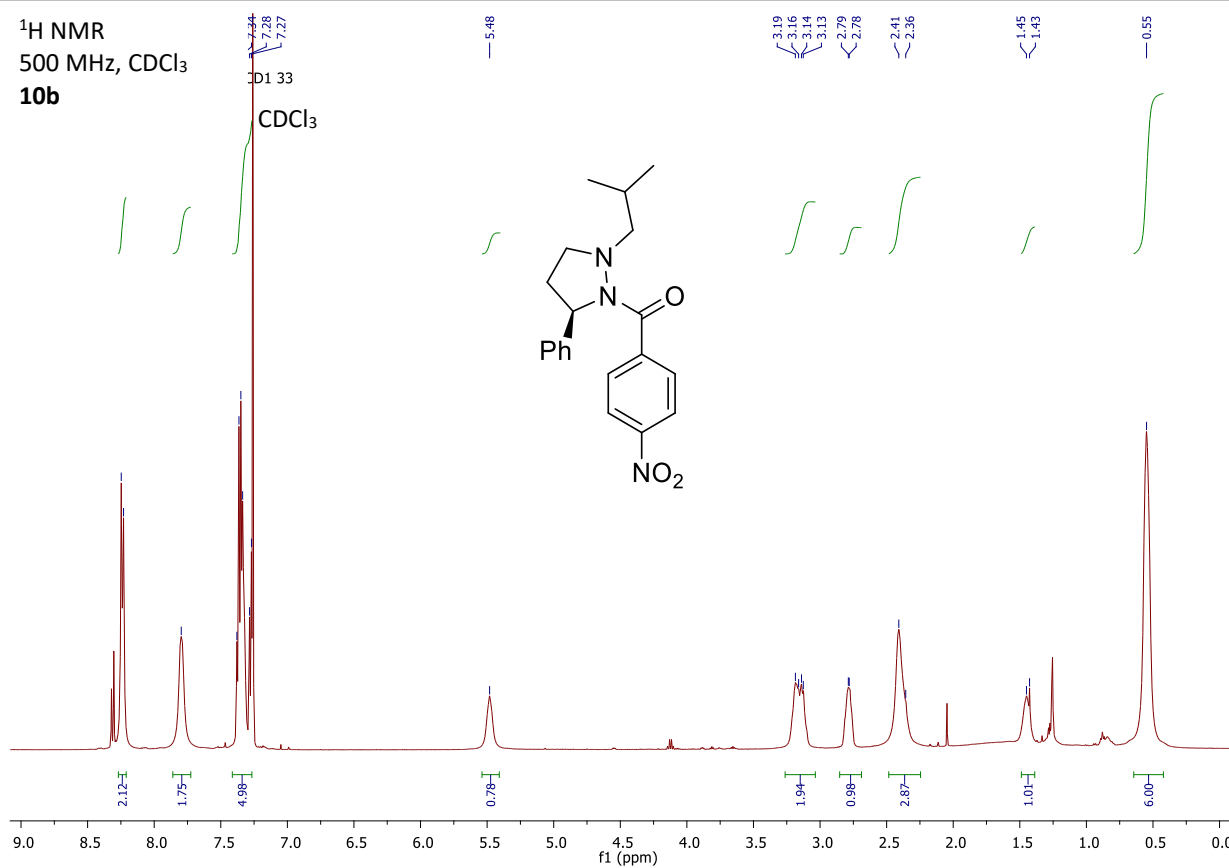

<sup>13</sup>C NMR  
125 MHz, CDCl<sub>3</sub>  
**10b**

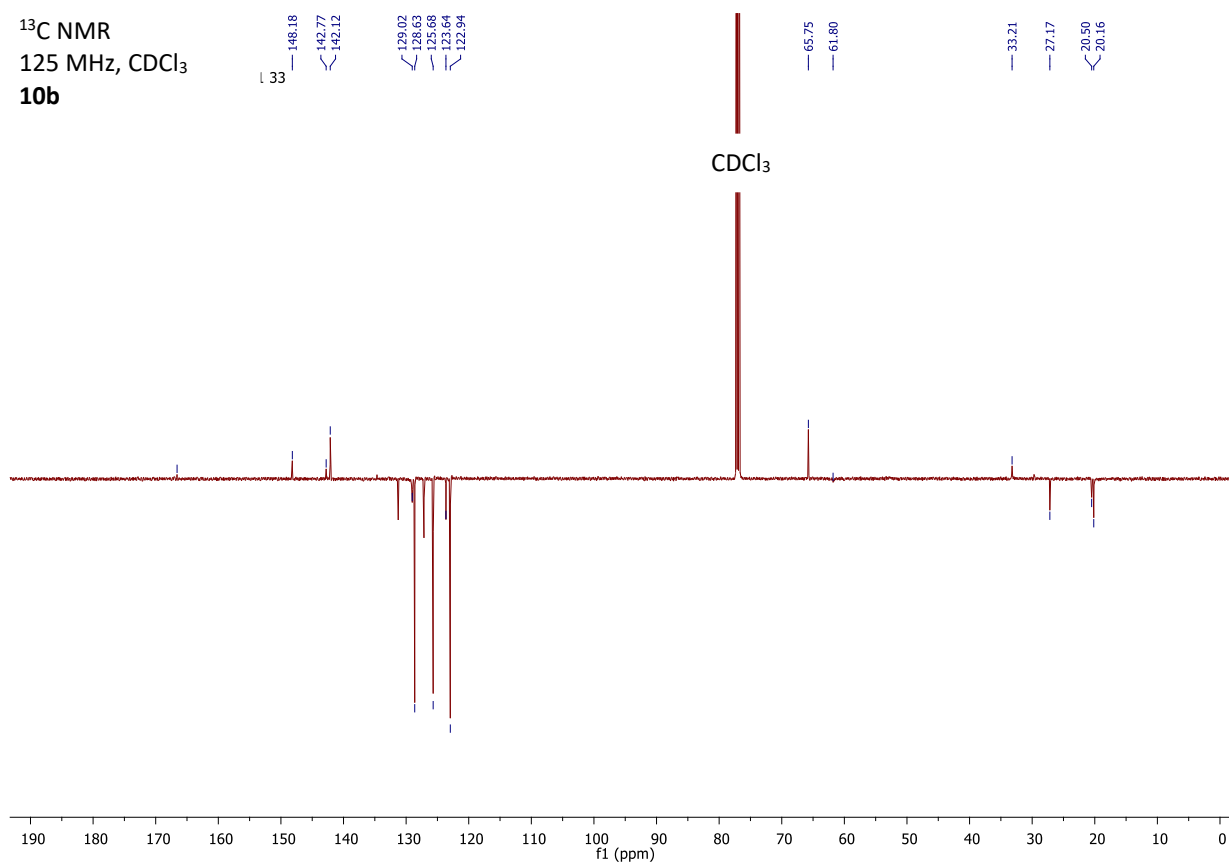

<sup>1</sup>H NMR  
500 MHz, CDCl<sub>3</sub>  
**10c**

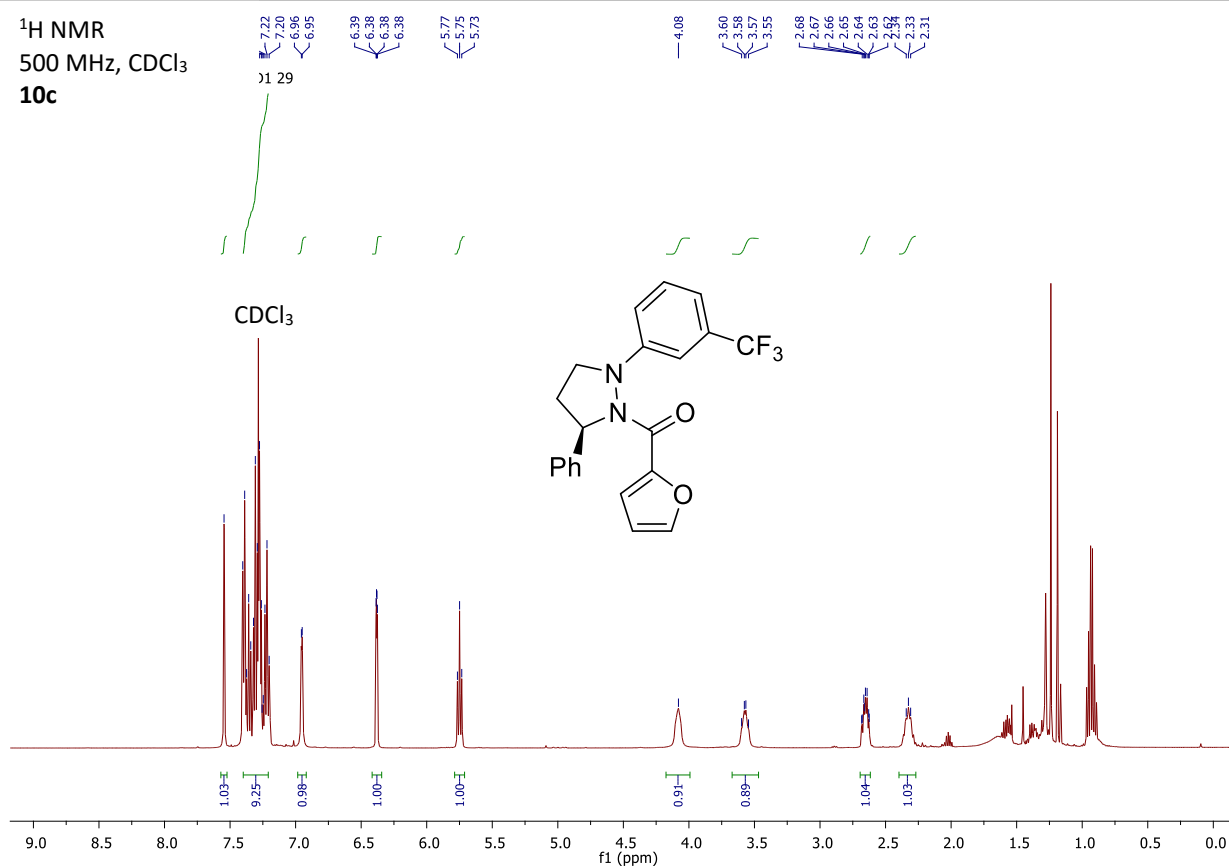

<sup>13</sup>C NMR  
125 MHz, CDCl<sub>3</sub>  
**10c**

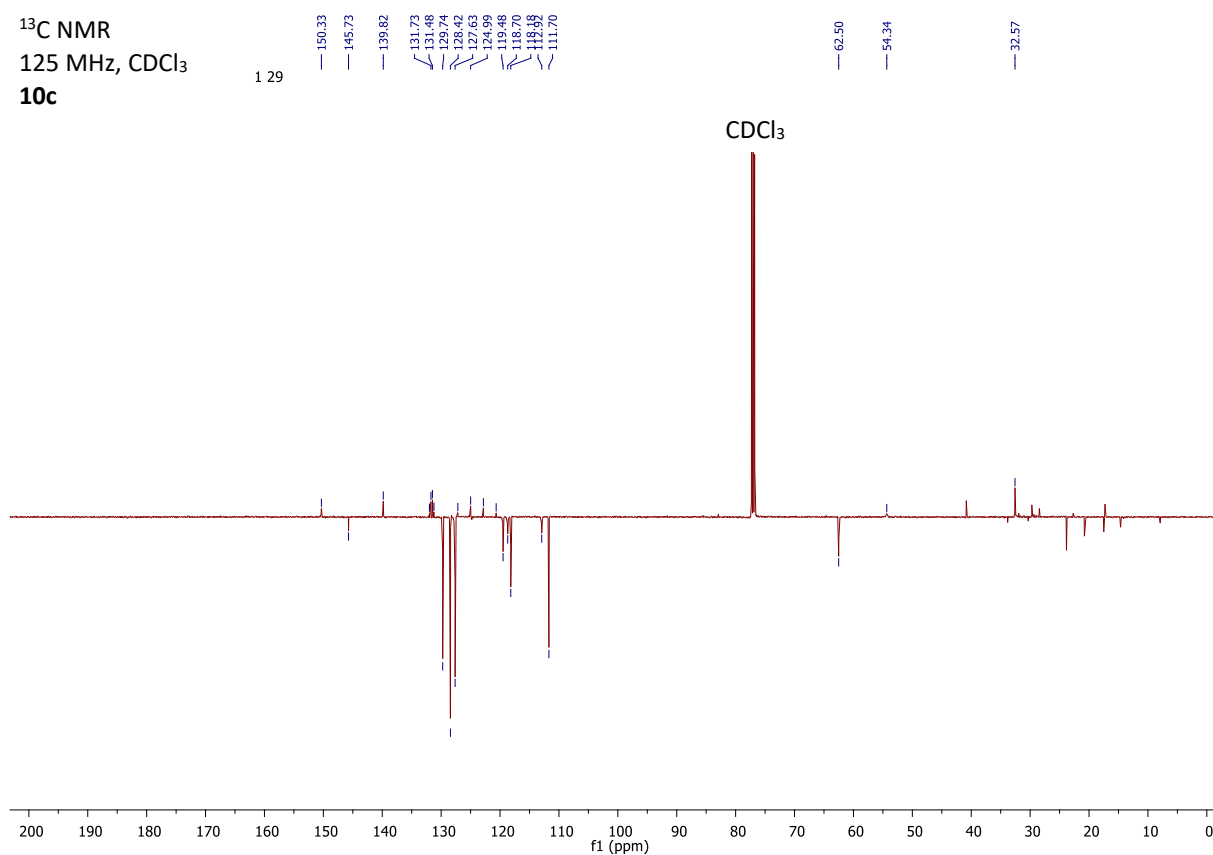

<sup>1</sup>H NMR  
600 MHz, d6-DMSO  
at 353 K  
**9d**

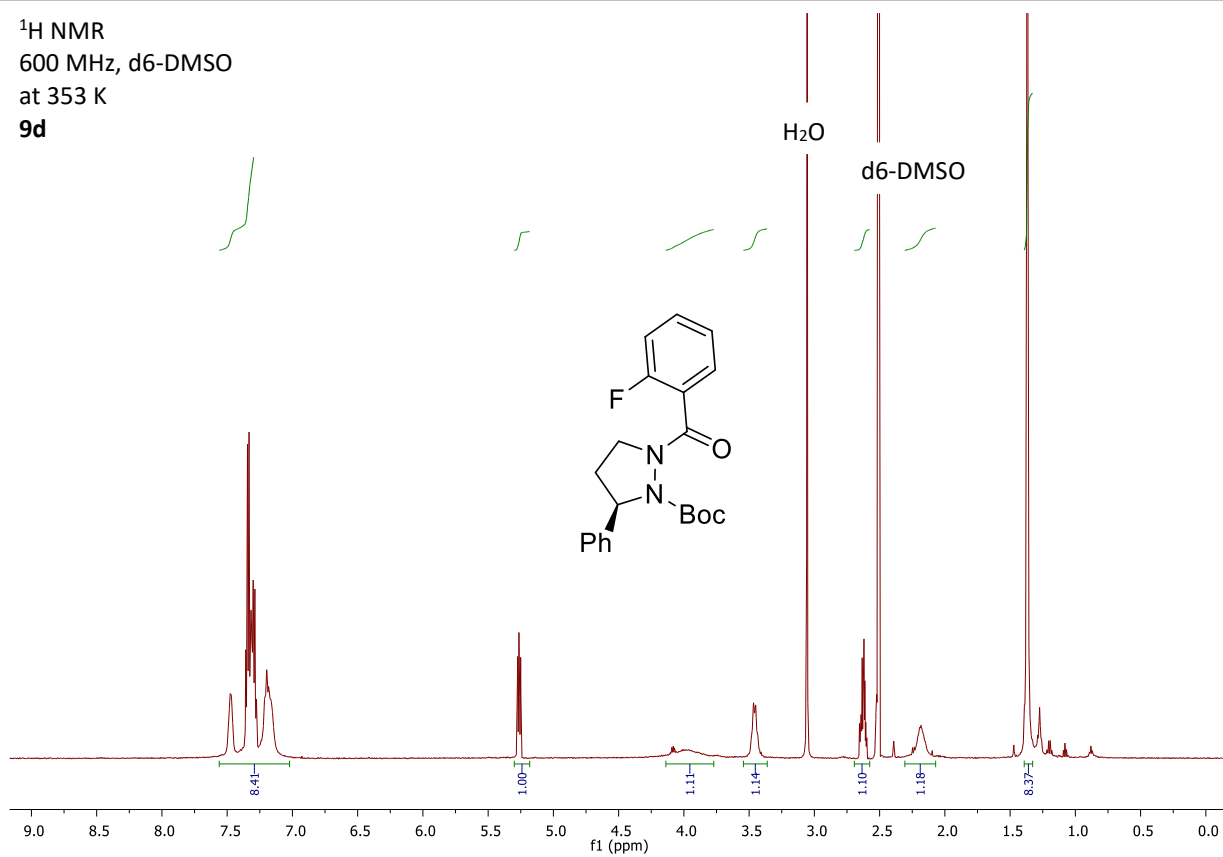

<sup>13</sup>C NMR  
150 MHz, d6-DMSO  
at 353 K  
**9d**

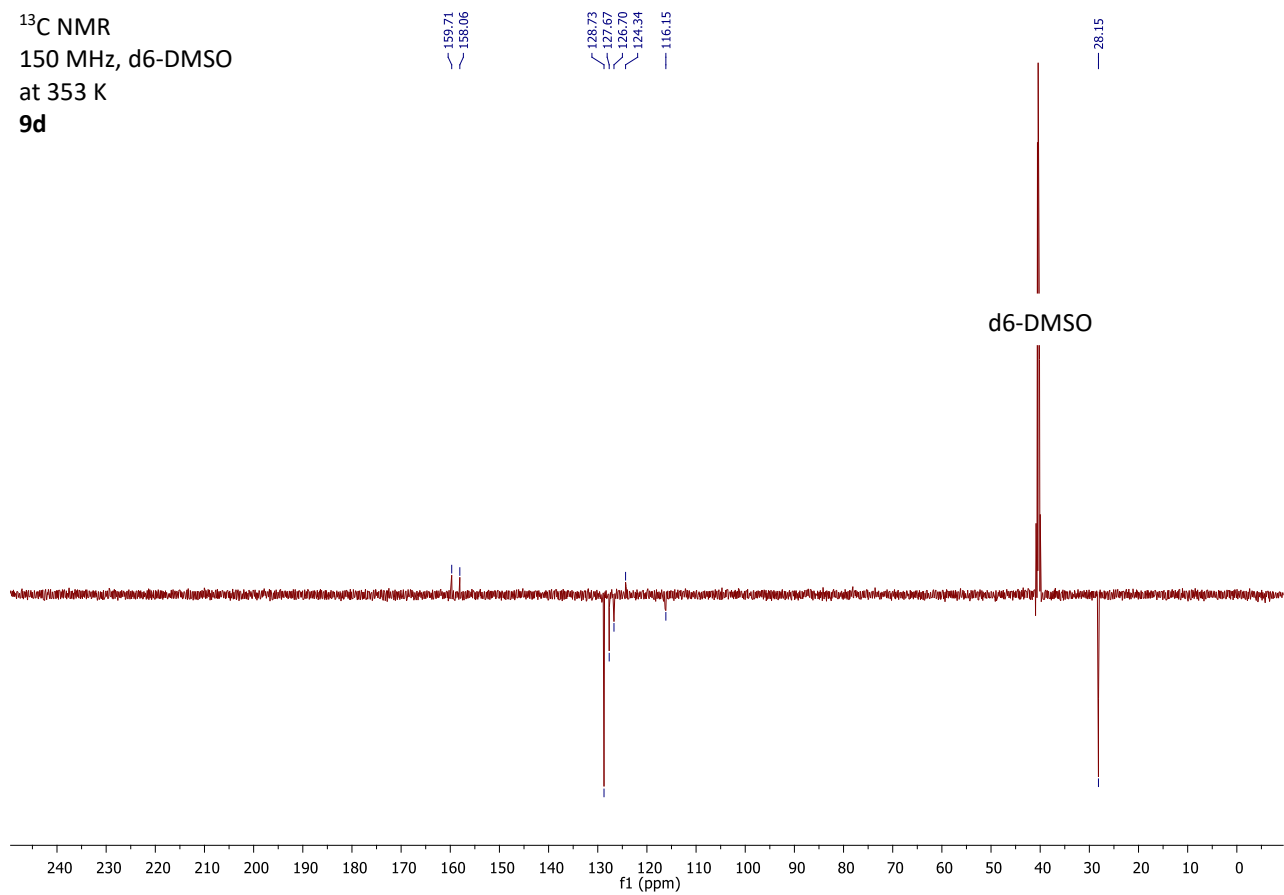

<sup>1</sup>H NMR  
500 MHz, CDCl<sub>3</sub>  
**10e**

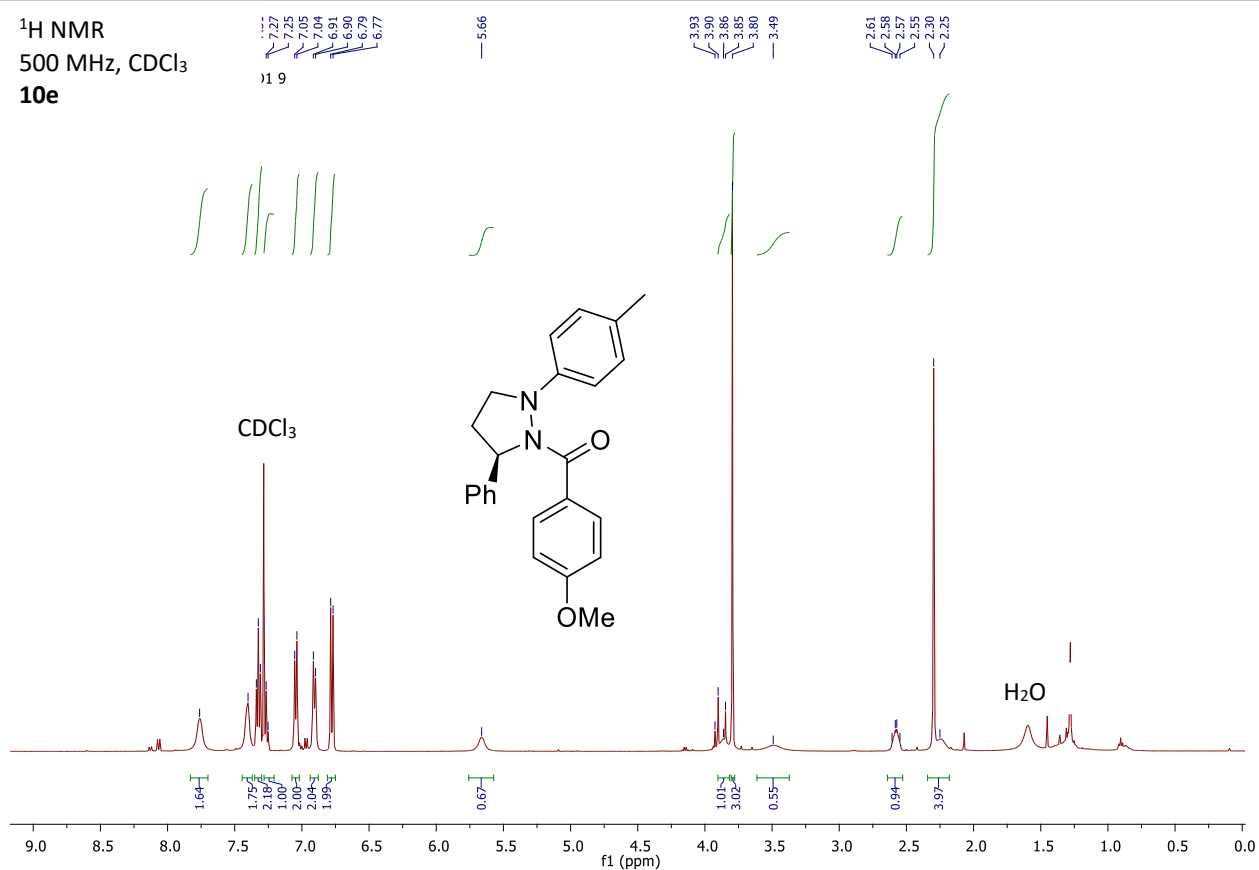

<sup>13</sup>C NMR  
125 MHz, CDCl<sub>3</sub>  
**10e**

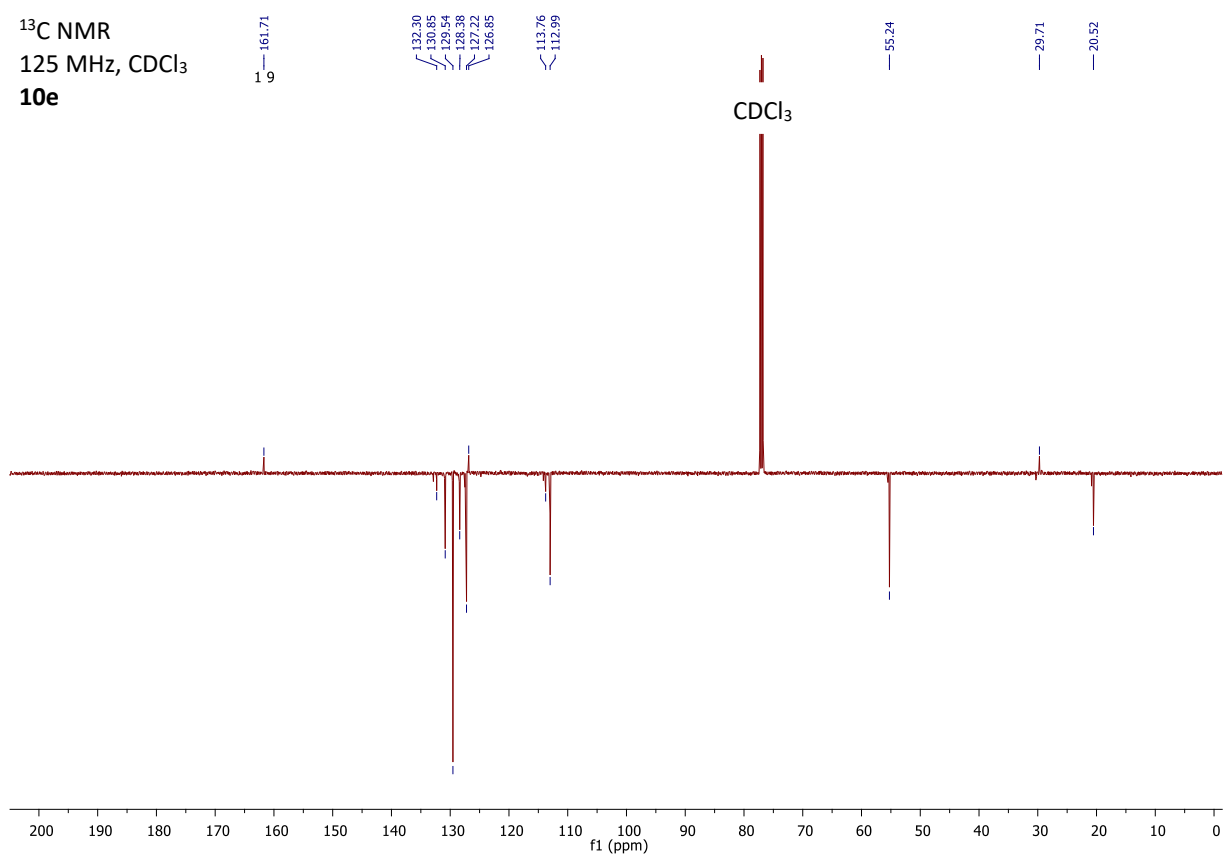

<sup>1</sup>H NMR  
500 MHz, CDCl<sub>3</sub>  
**10f**

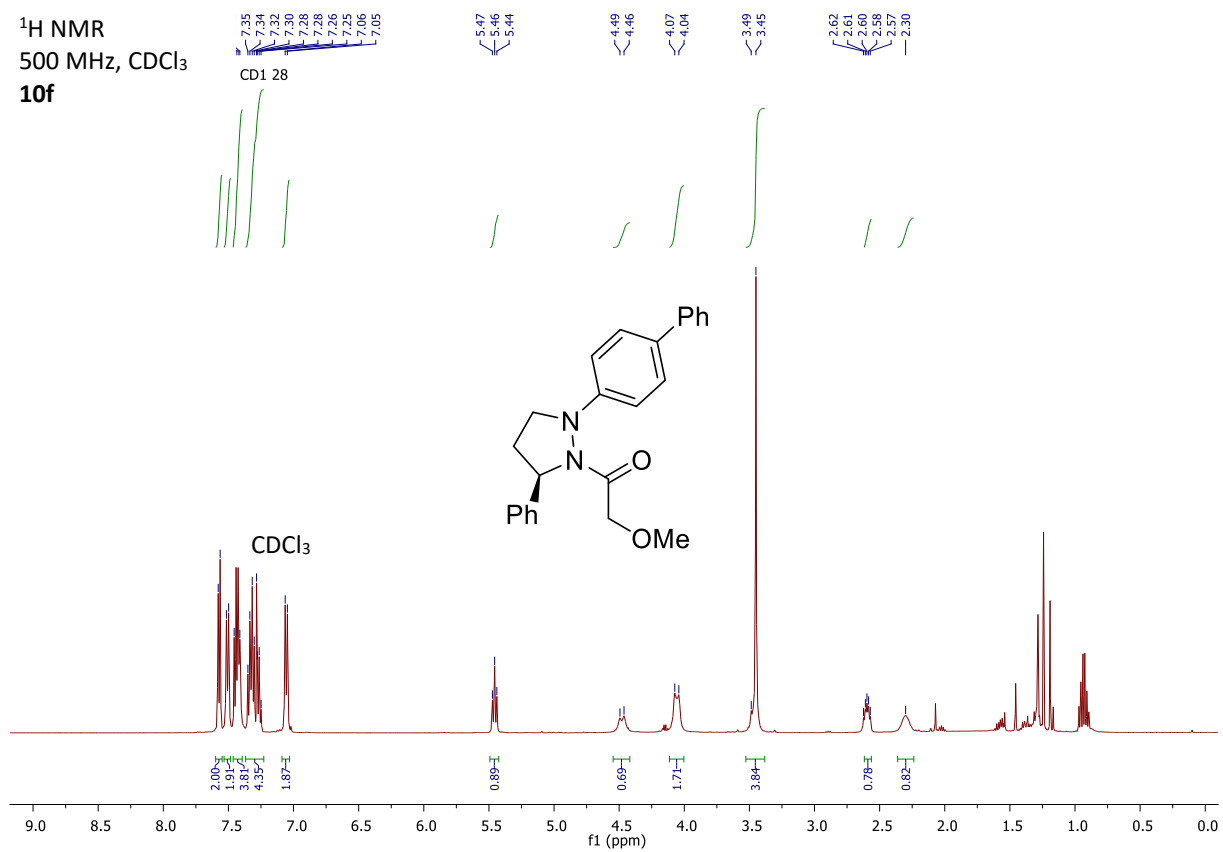

<sup>13</sup>C NMR  
125 MHz, CDCl<sub>3</sub>  
**10f**

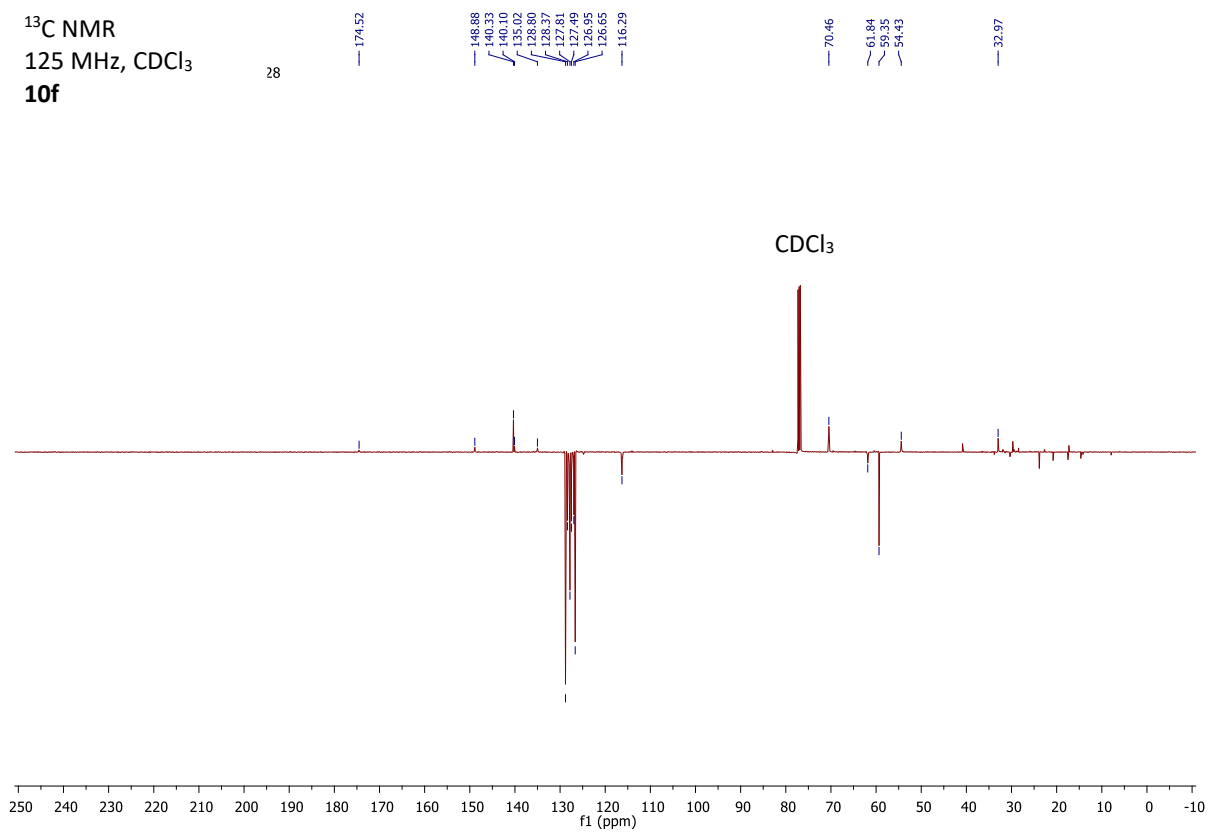



<sup>1</sup>H NMR  
400 MHz, CDCl<sub>3</sub>  
**9g**

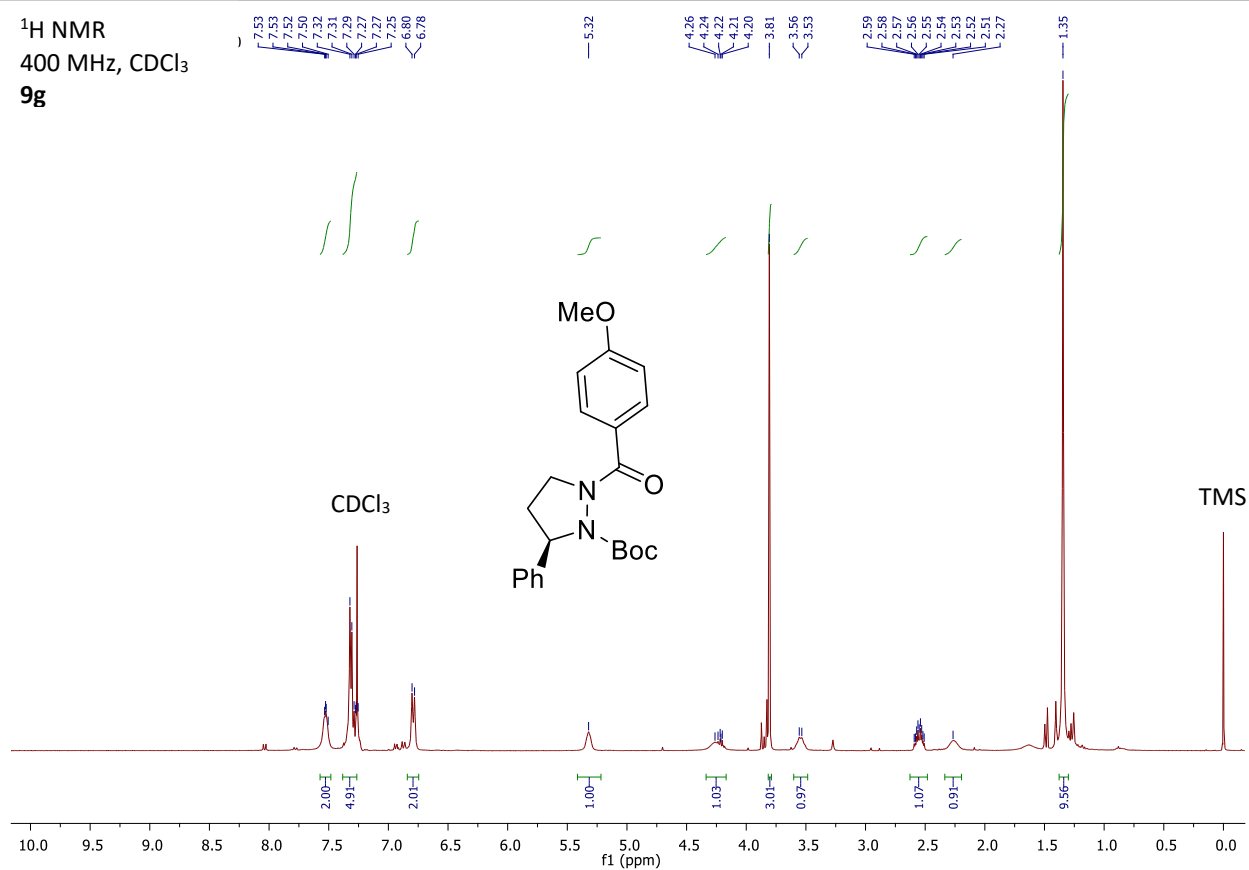

<sup>13</sup>C NMR  
100 MHz, CDCl<sub>3</sub>  
**9g**

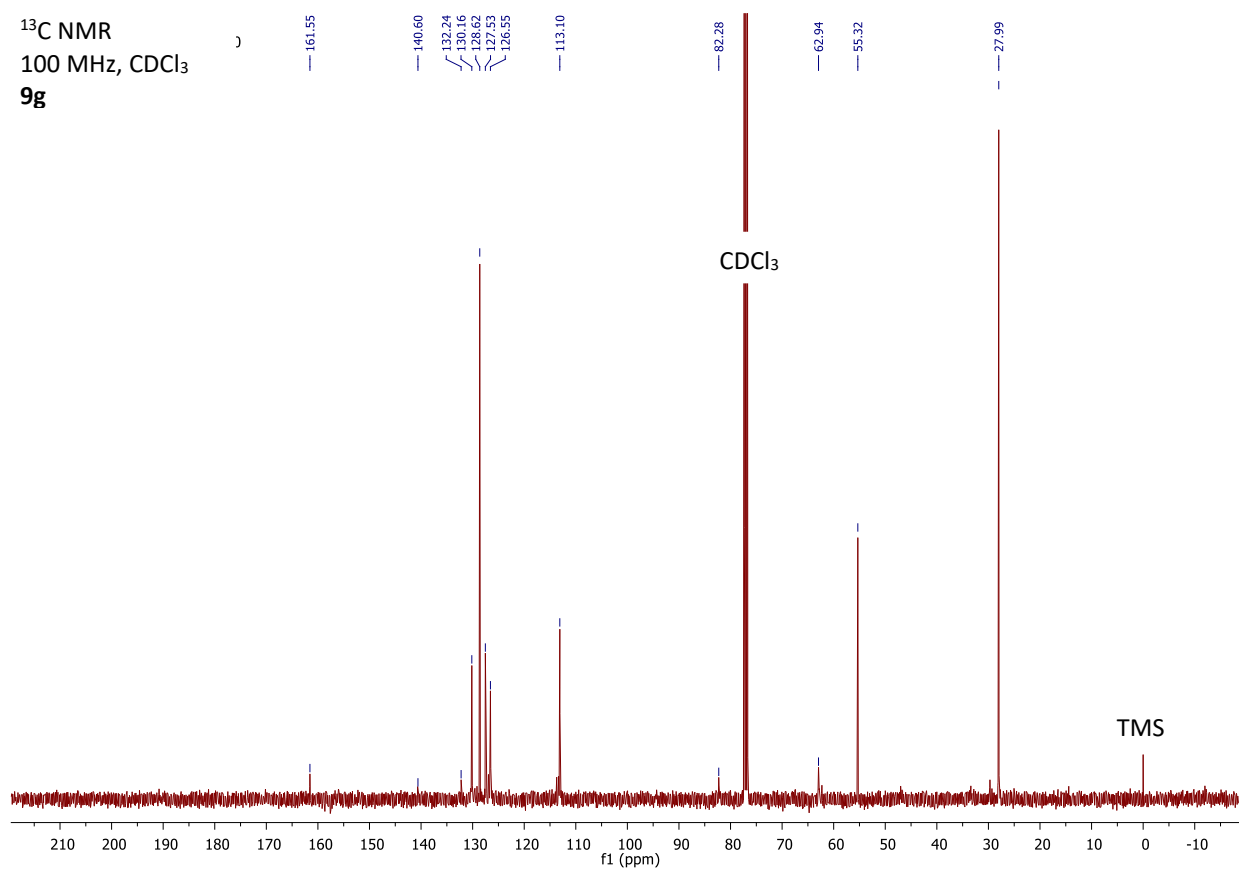

<sup>1</sup>H NMR  
500 MHz, CDCl<sub>3</sub>  
10h

7.35  
7.04  
7.02  
D1 60

5.53  
5.51  
5.50

4.08

3.57  
3.56

2.67  
2.66  
2.65  
2.63  
2.62  
2.59  
2.57  
2.56  
2.37  
2.35  
2.33  
2.31  
2.29  
2.27  
2.26  
2.24

1.13  
1.12  
1.10

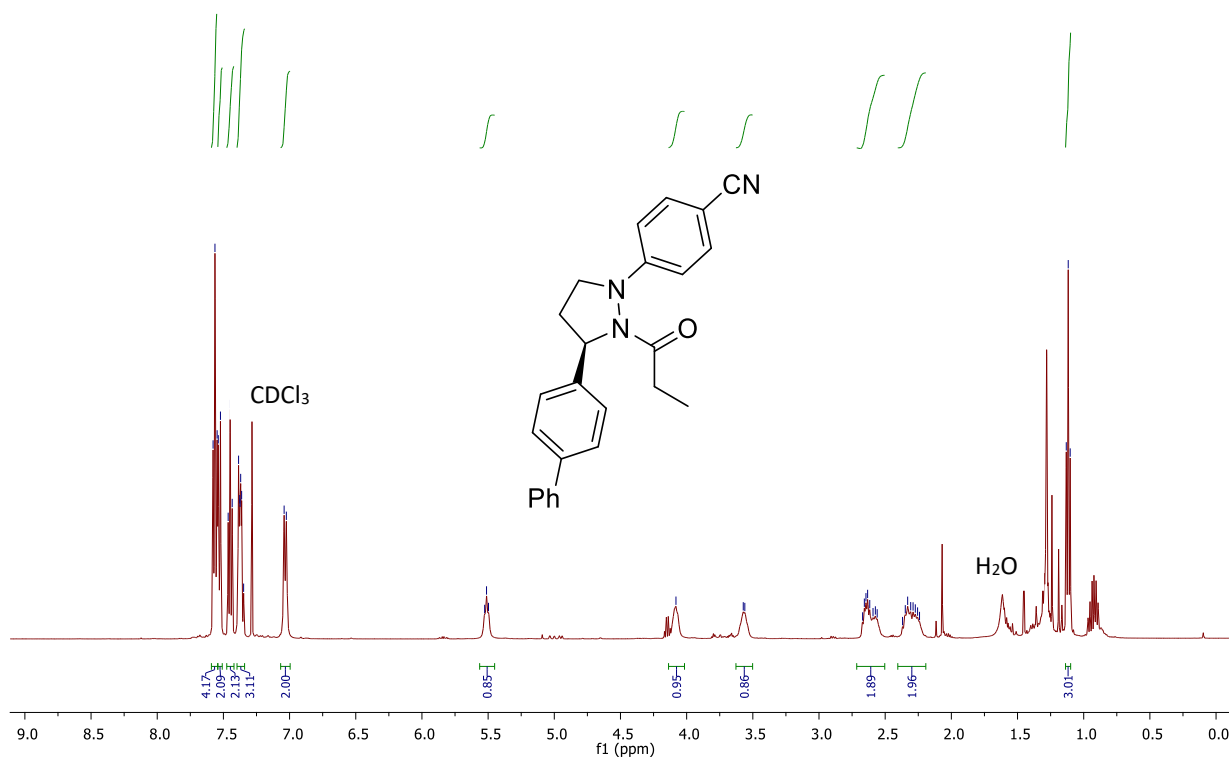

<sup>13</sup>C NMR  
125 MHz, CDCl<sub>3</sub>  
10h

153.49  
60

140.68  
140.53  
139.13  
133.51  
128.80  
127.42  
127.28  
127.05  
119.23  
115.34  
114.08

104.04

61.21

53.10

33.72

26.44

8.55

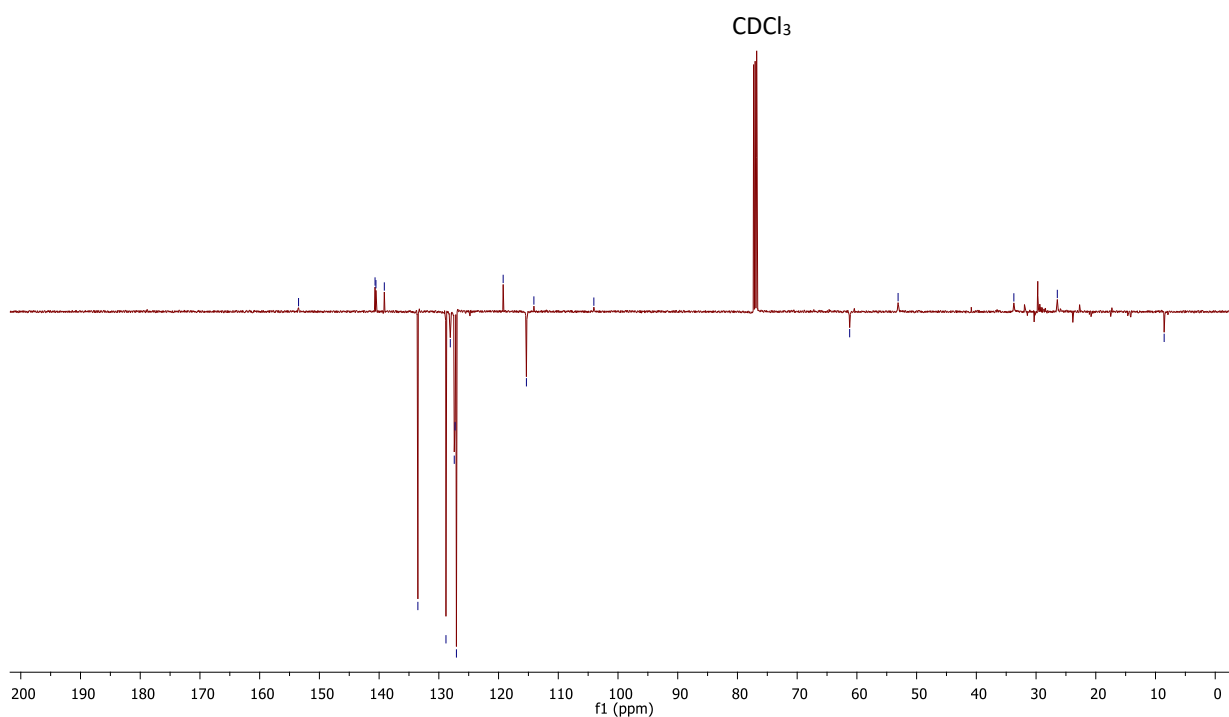

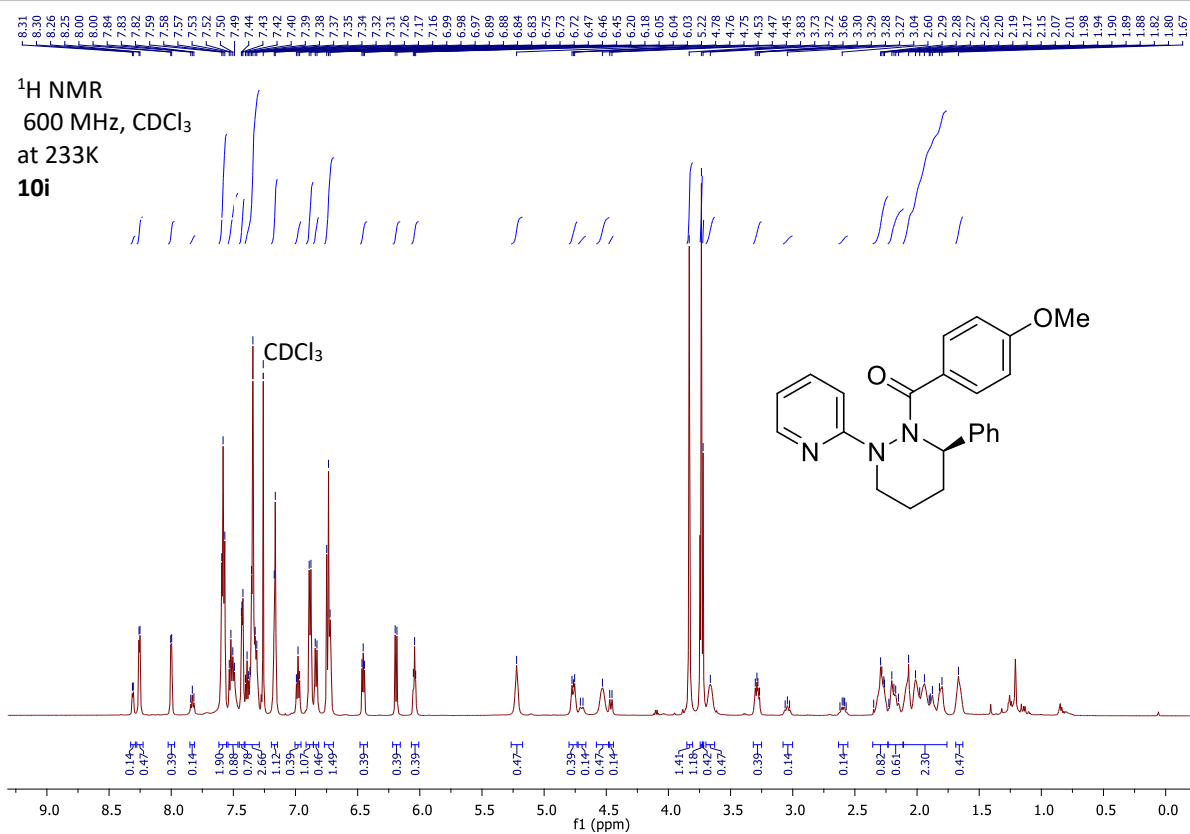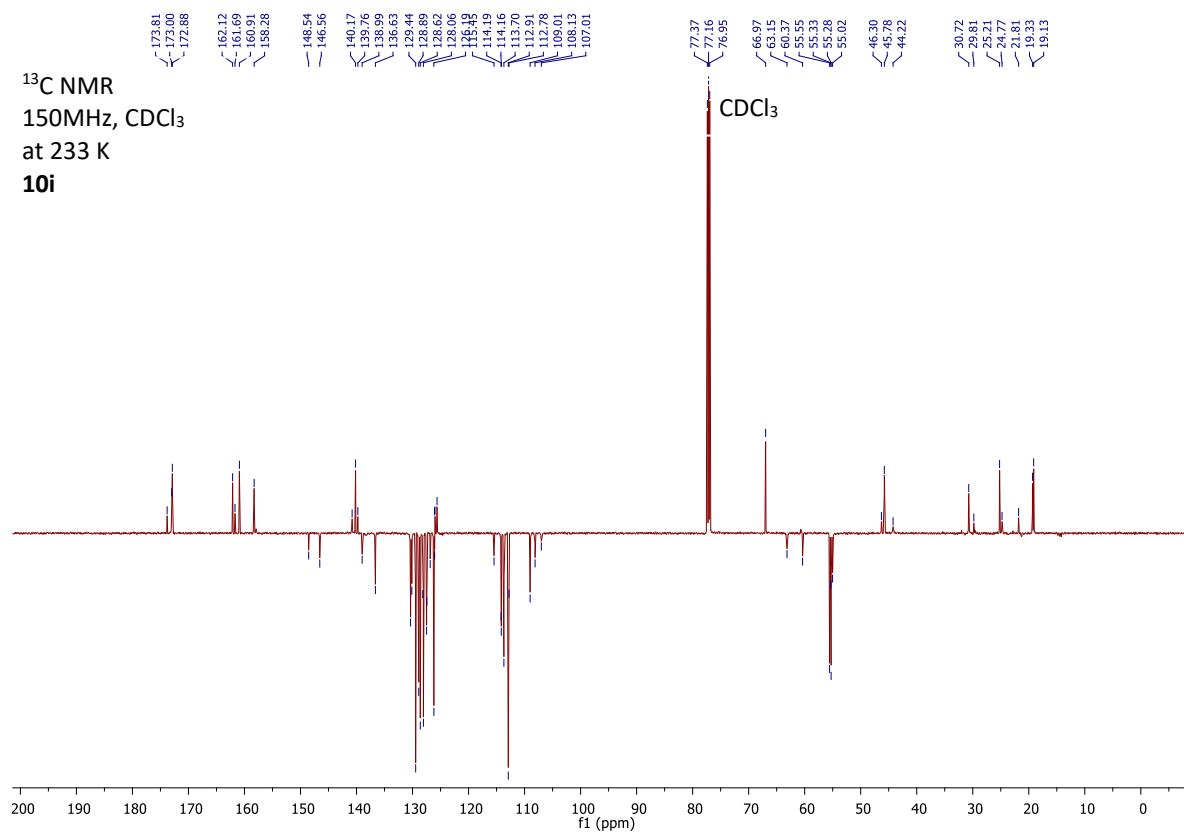

<sup>1</sup>H NMR  
500 MHz, CDCl<sub>3</sub>  
10k

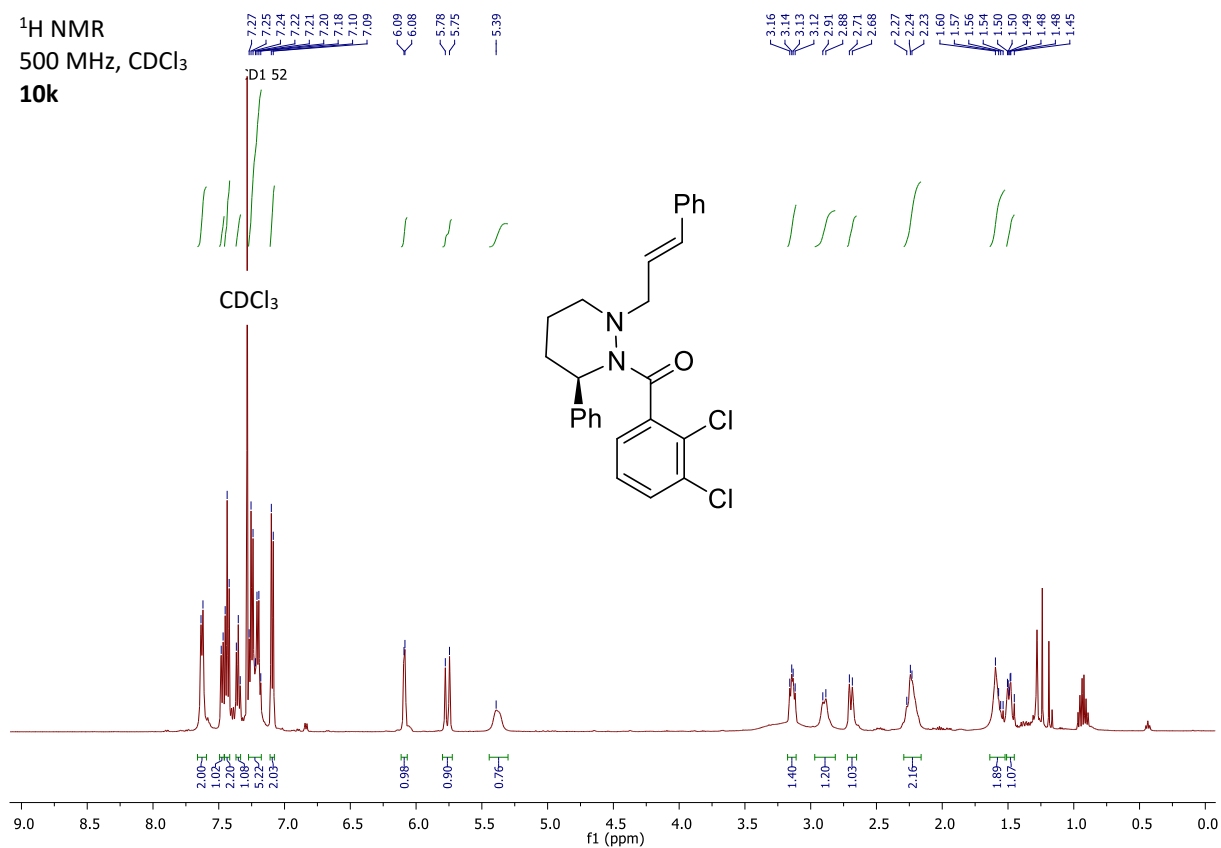

<sup>13</sup>C NMR  
125 MHz, CDCl<sub>3</sub>  
10k

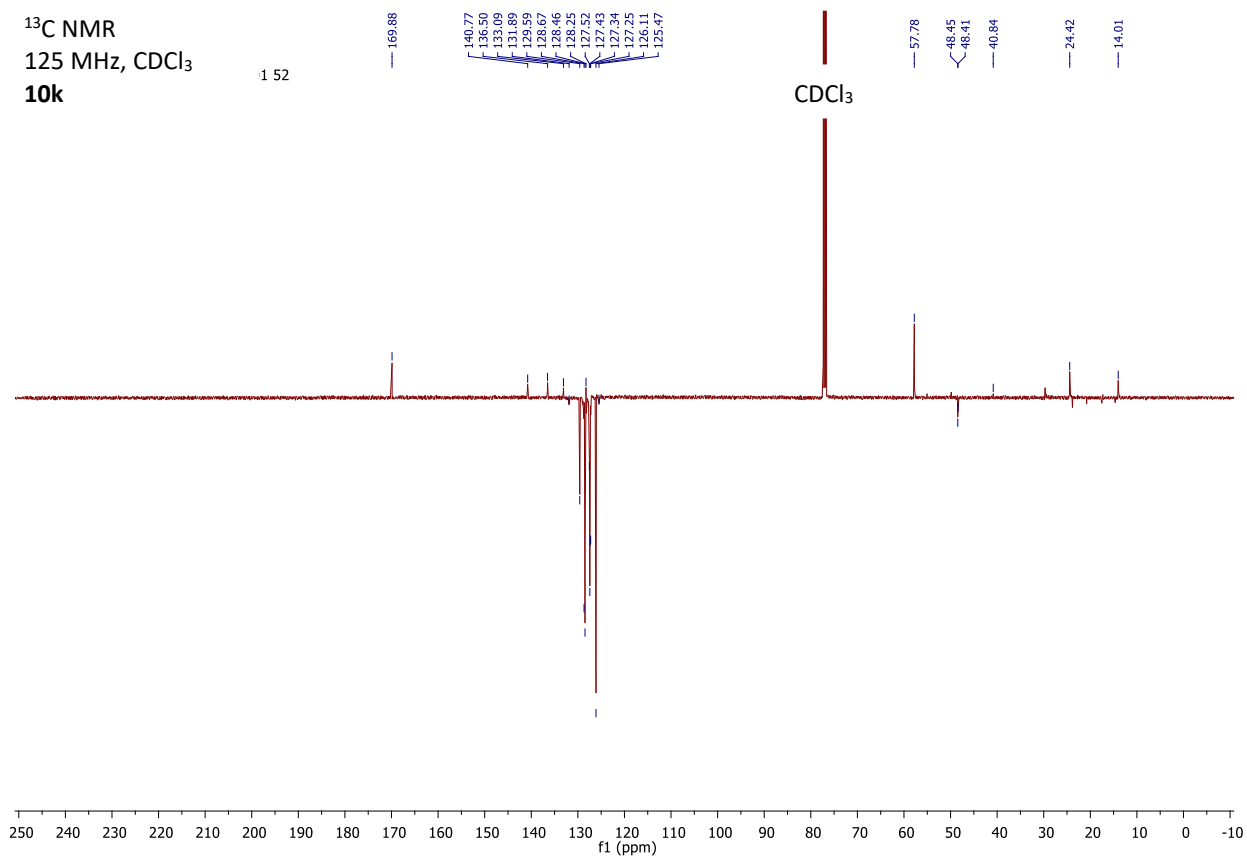



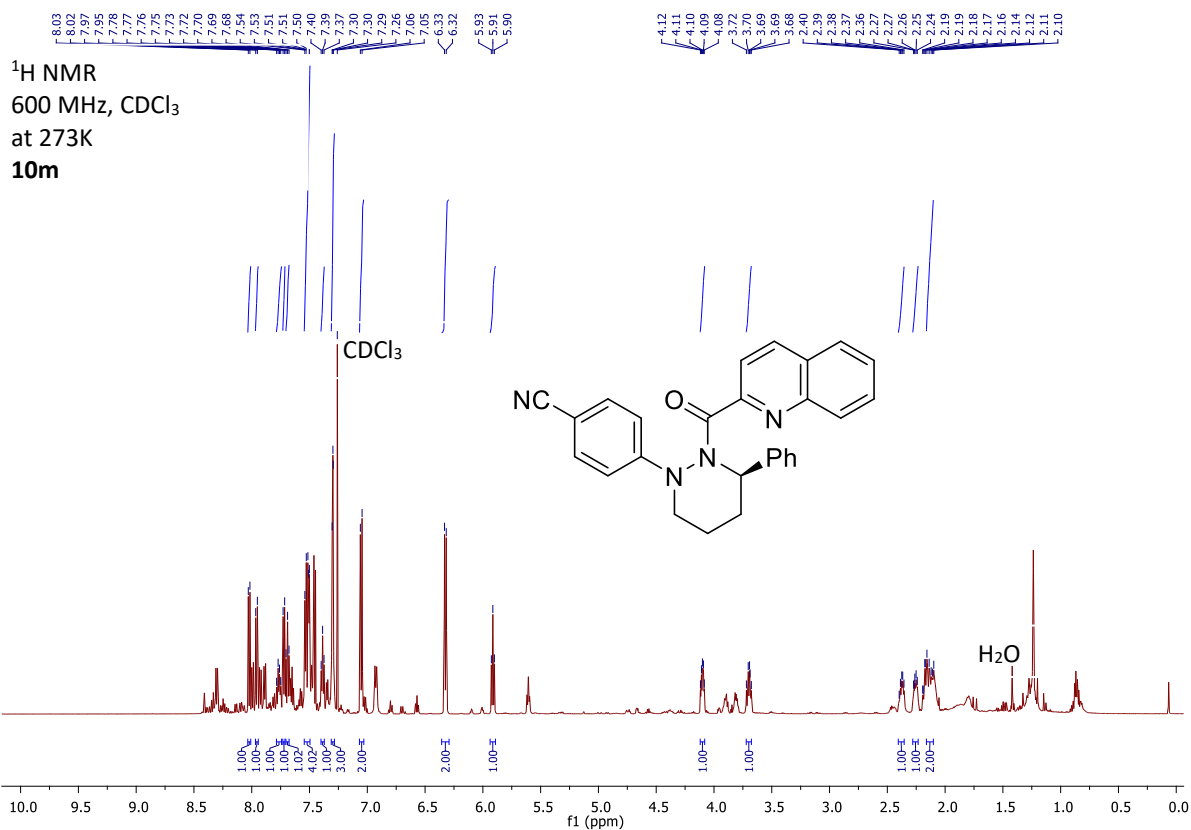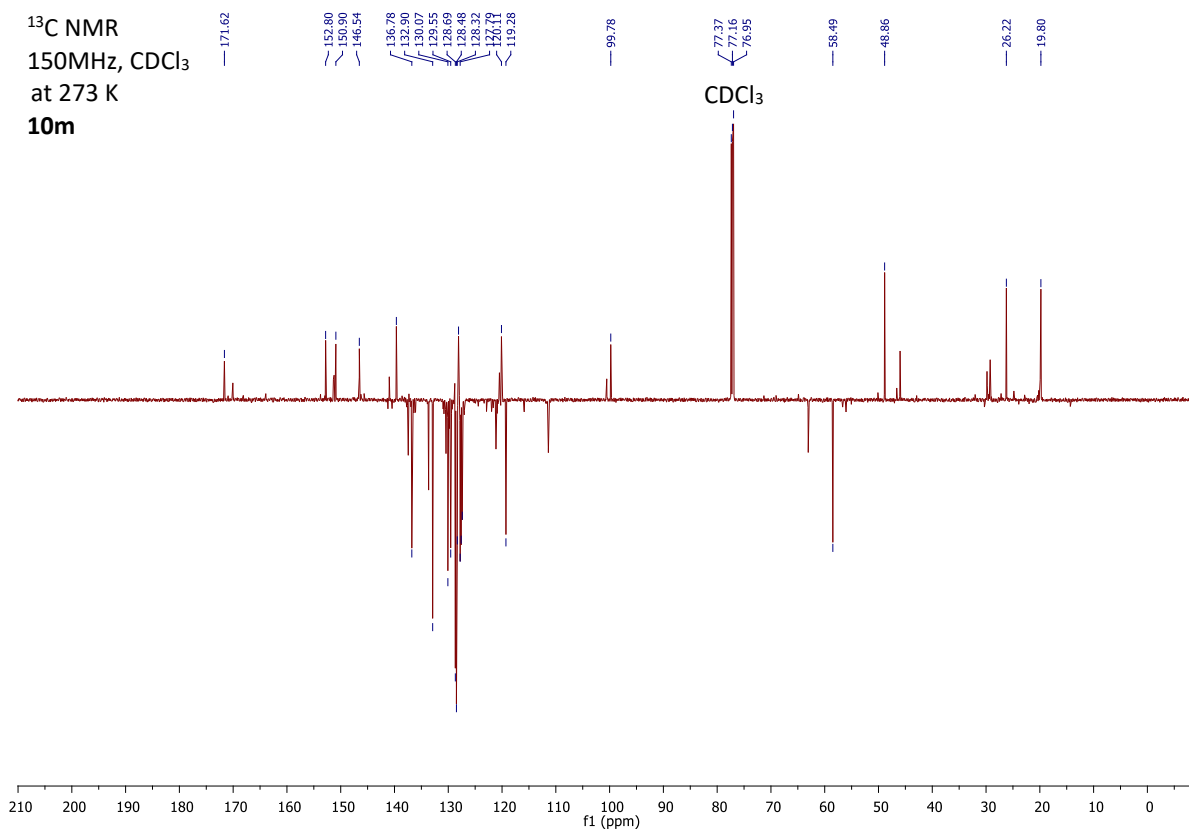

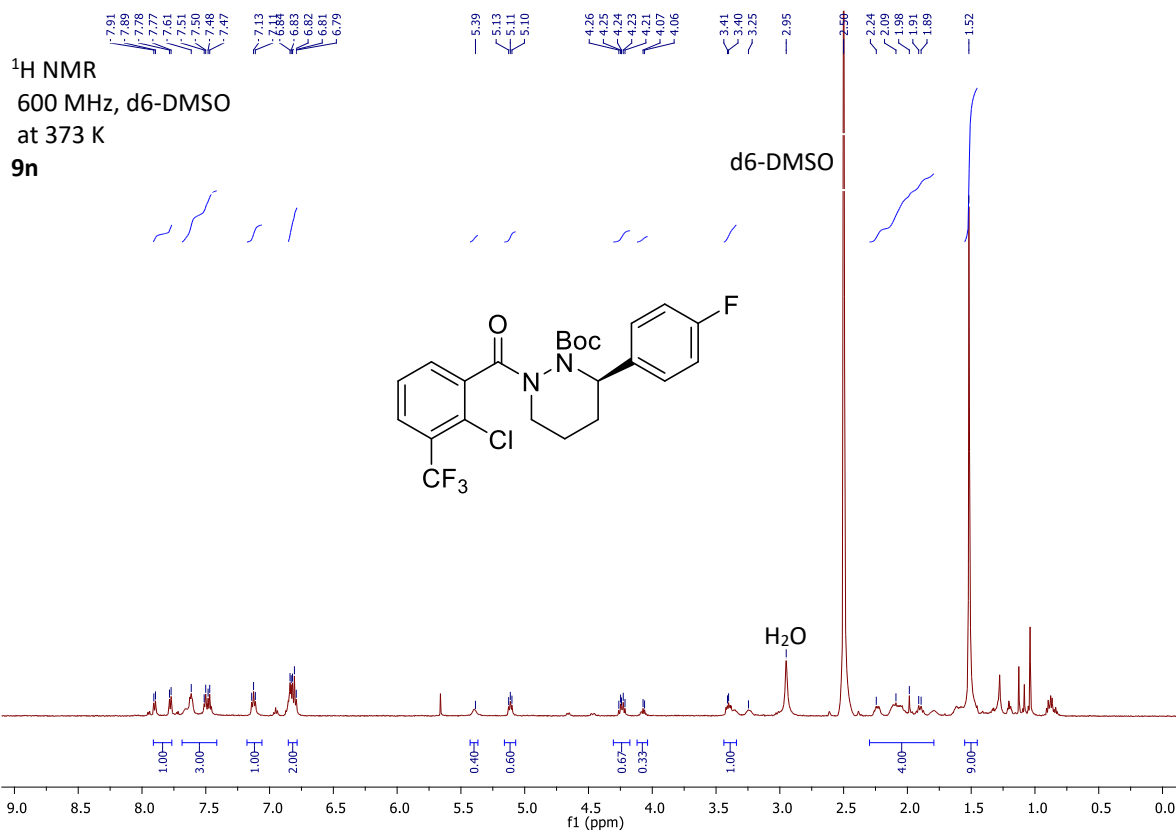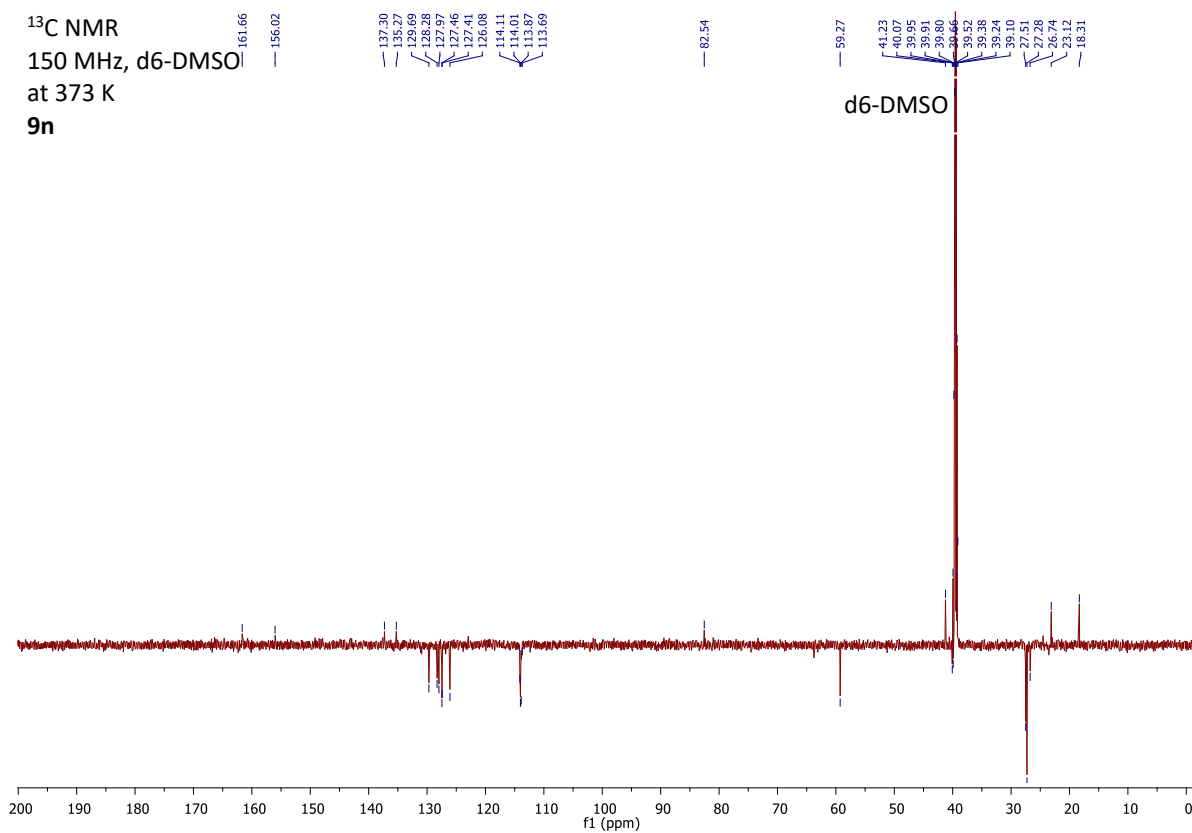

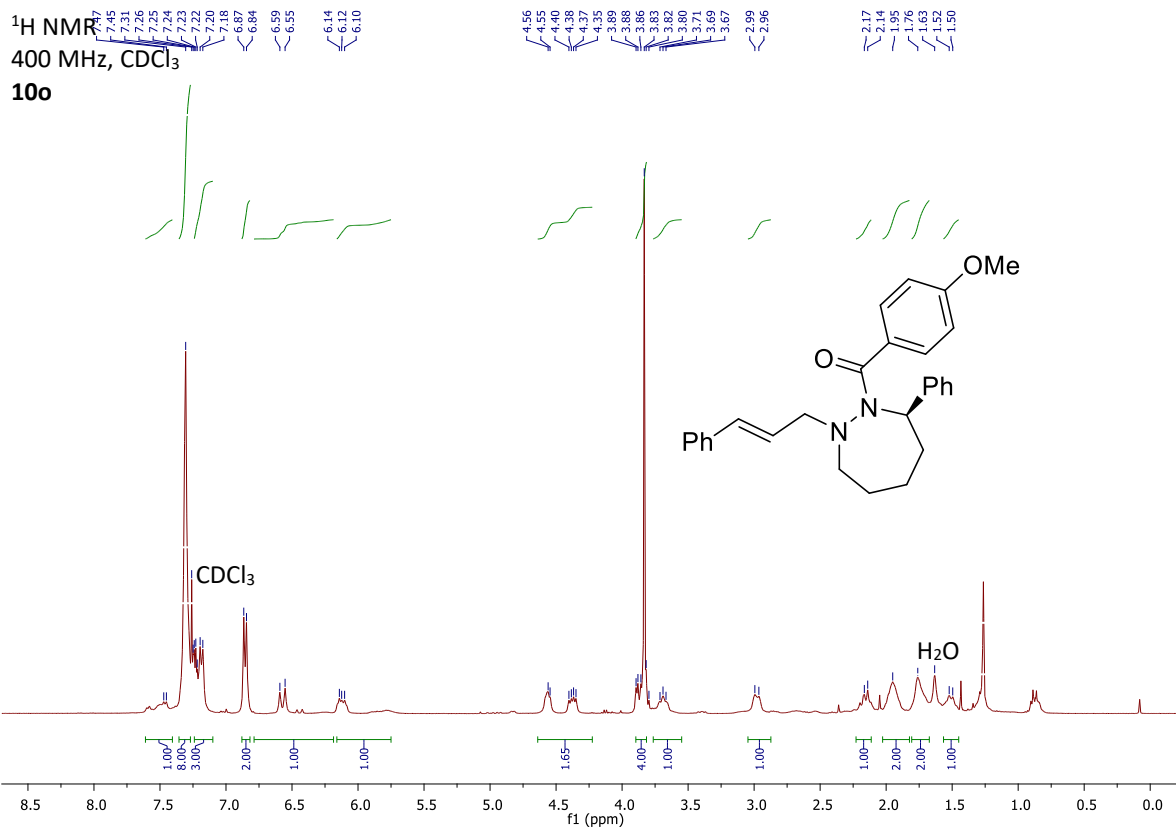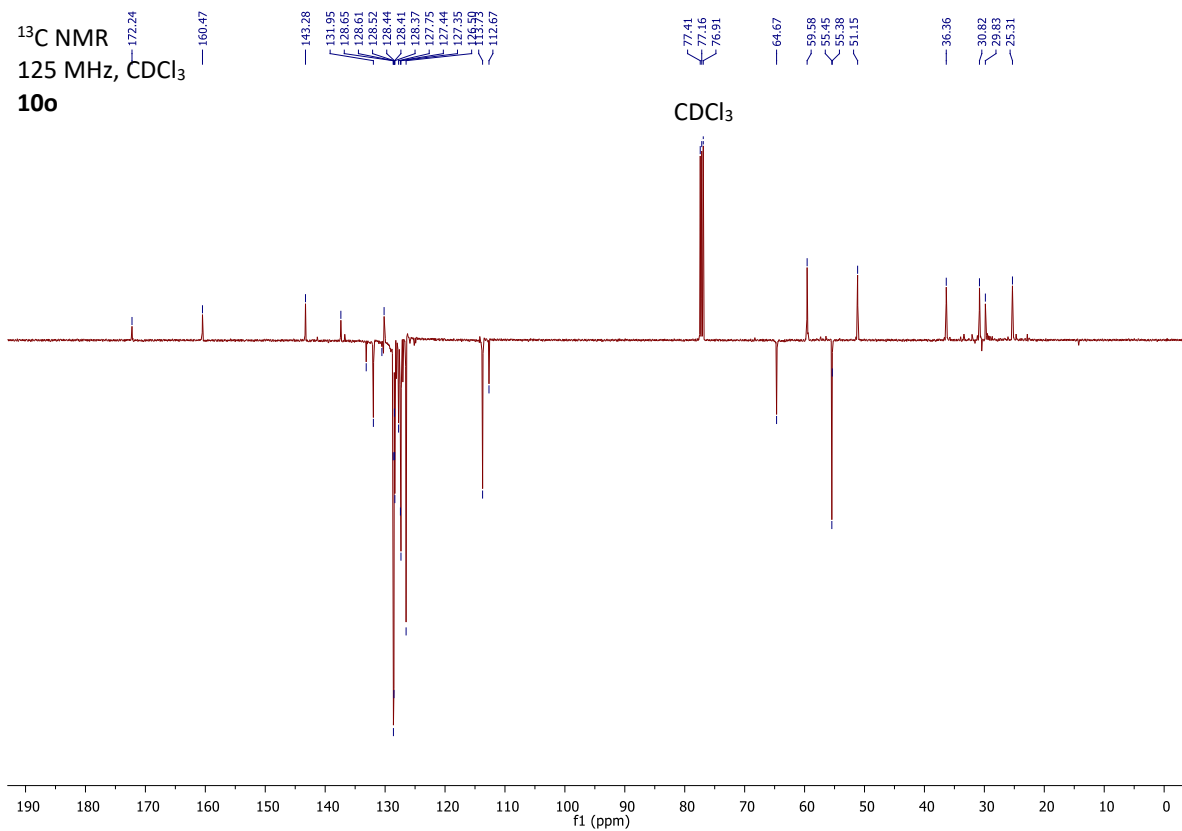



<sup>1</sup>H NMR  
400 MHz, CDCl<sub>3</sub>  
**10p**

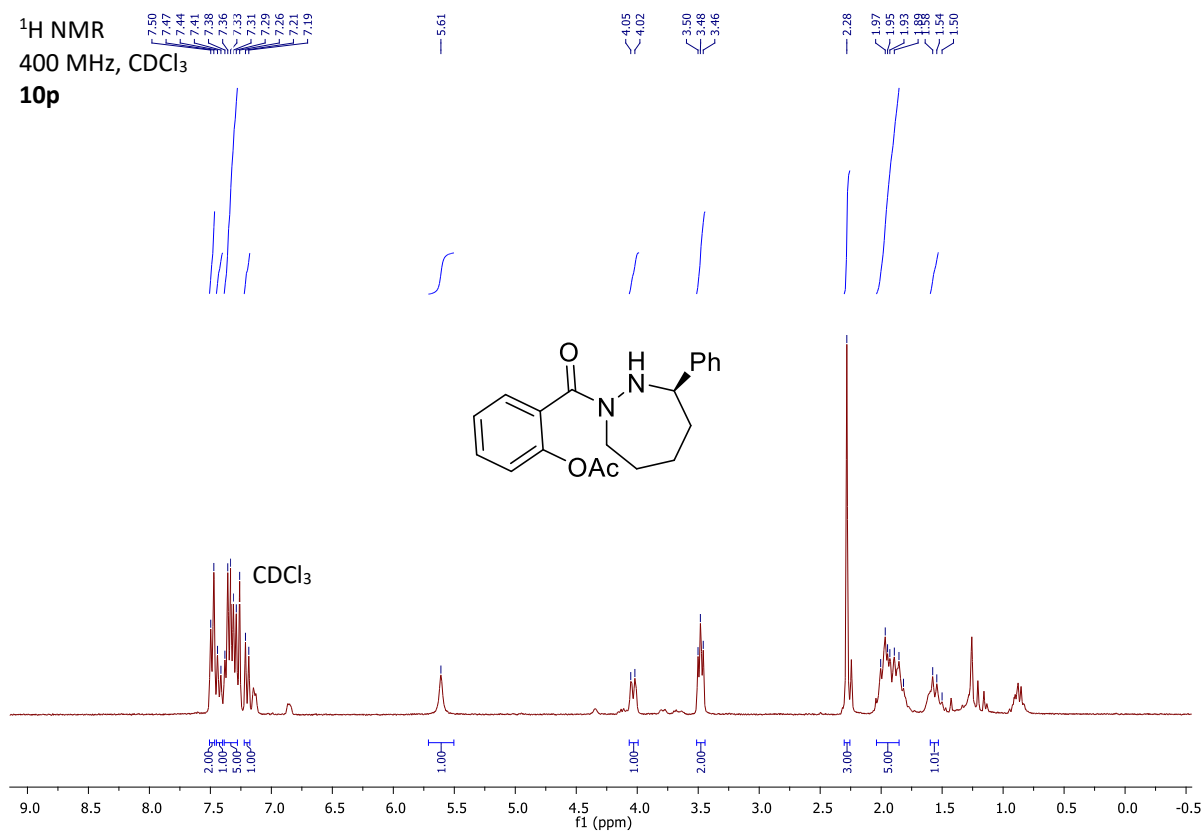

<sup>13</sup>C NMR  
125 MHz, CDCl<sub>3</sub>  
**10p**

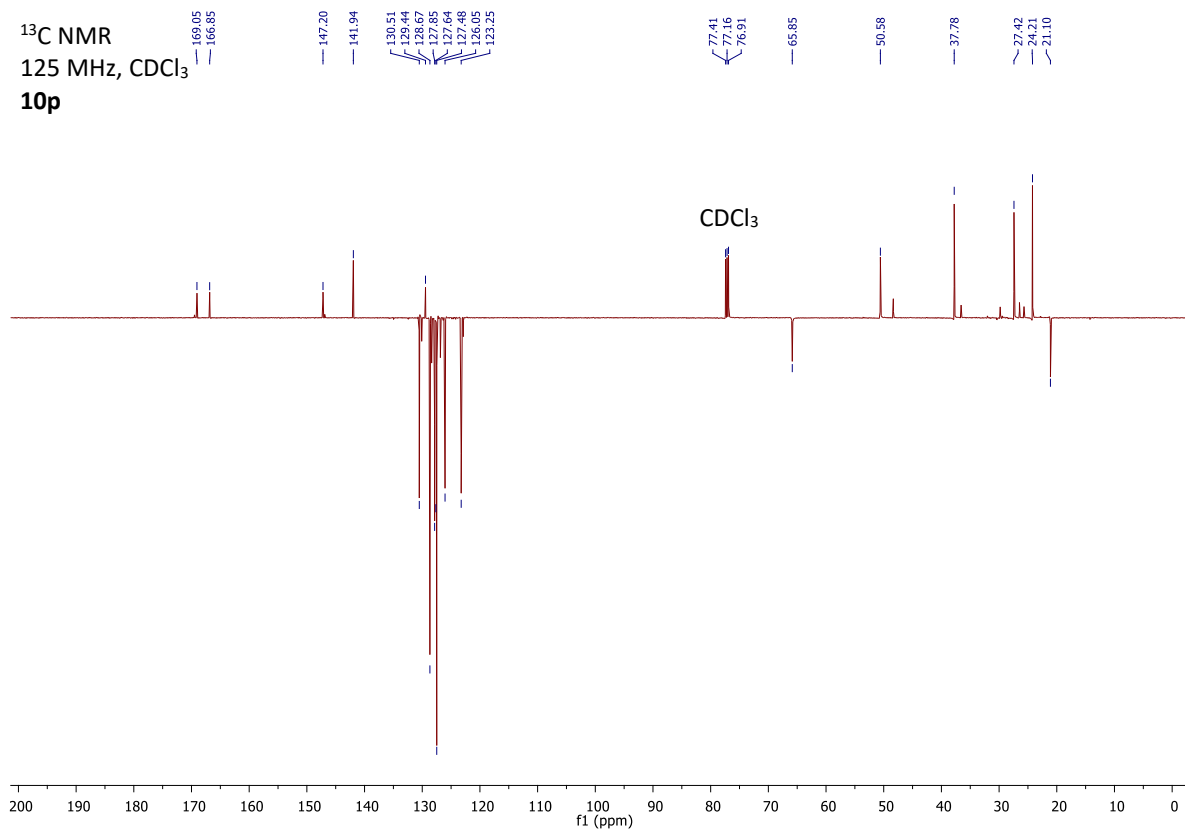

<sup>1</sup>H NMR  
600 MHz, d6-DMSO  
at 373 K  
**10c**

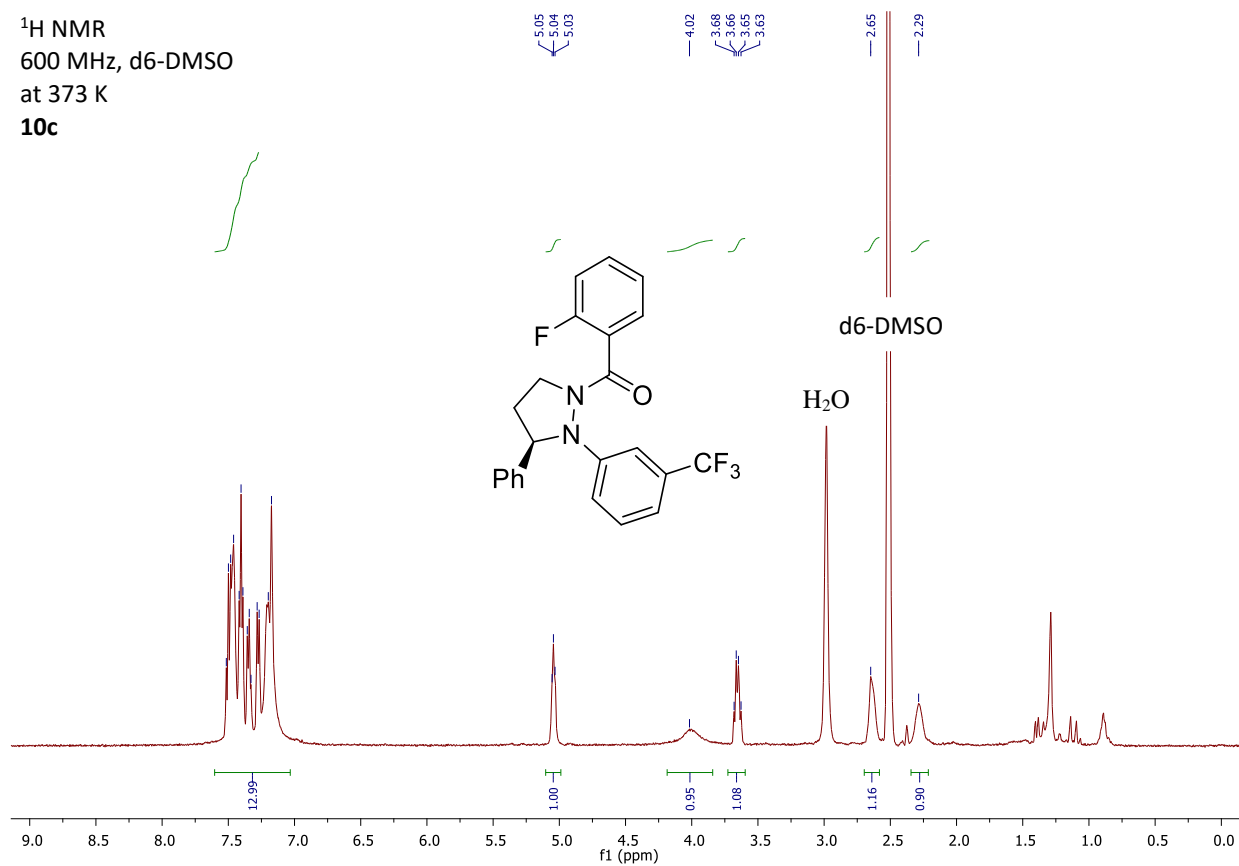

<sup>13</sup>C NMR  
125 MHz, d6-DMSO  
at 373 K  
**10c**

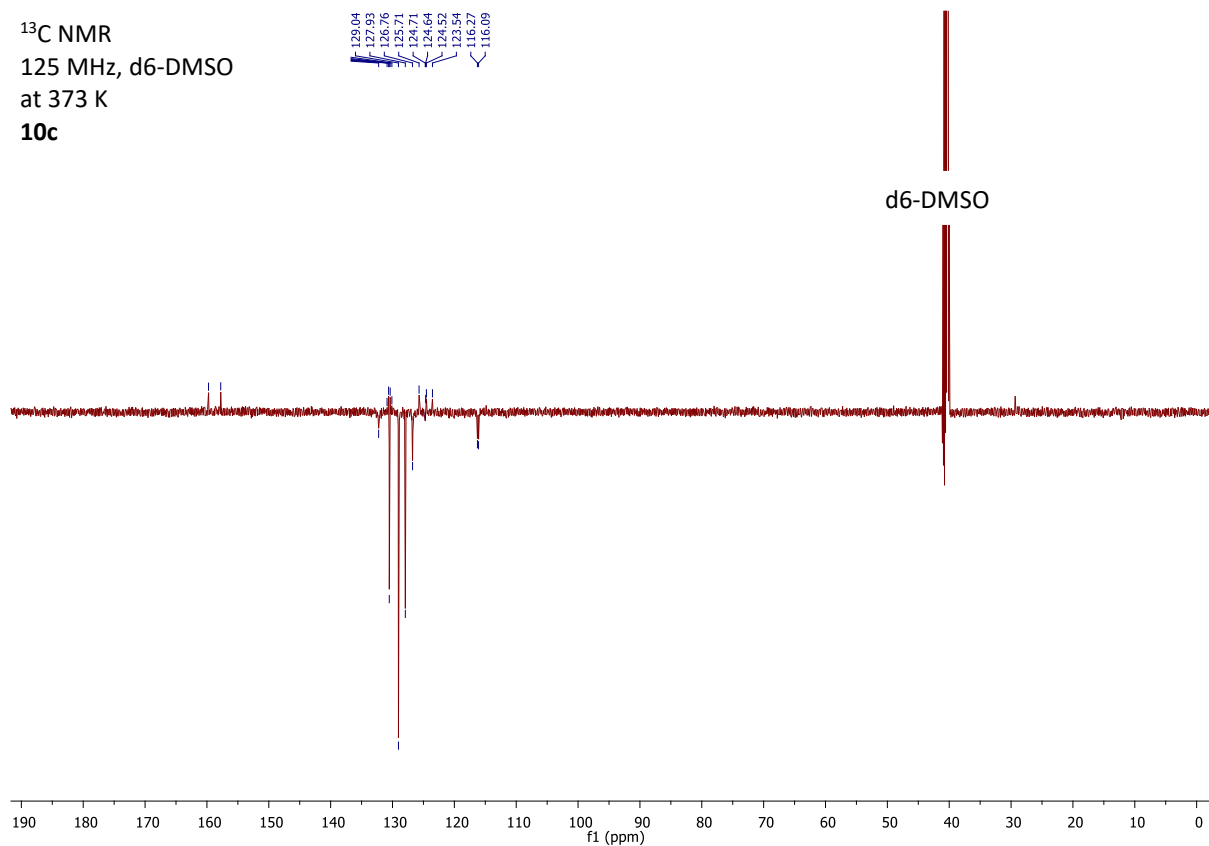

<sup>1</sup>H NMR  
400 MHz, CDCl<sub>3</sub>  
**10g**

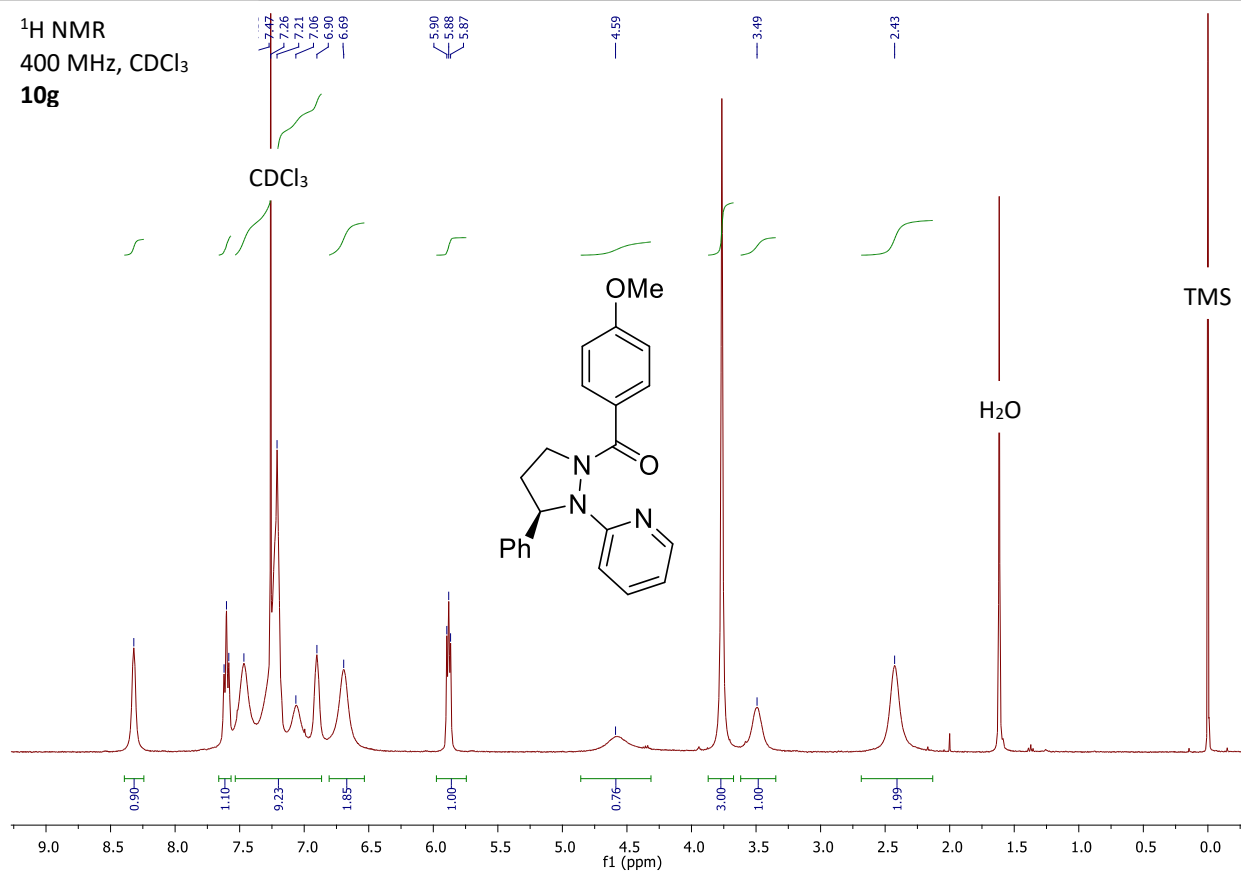

<sup>13</sup>C NMR  
100 MHz, CDCl<sub>3</sub>  
**10g**

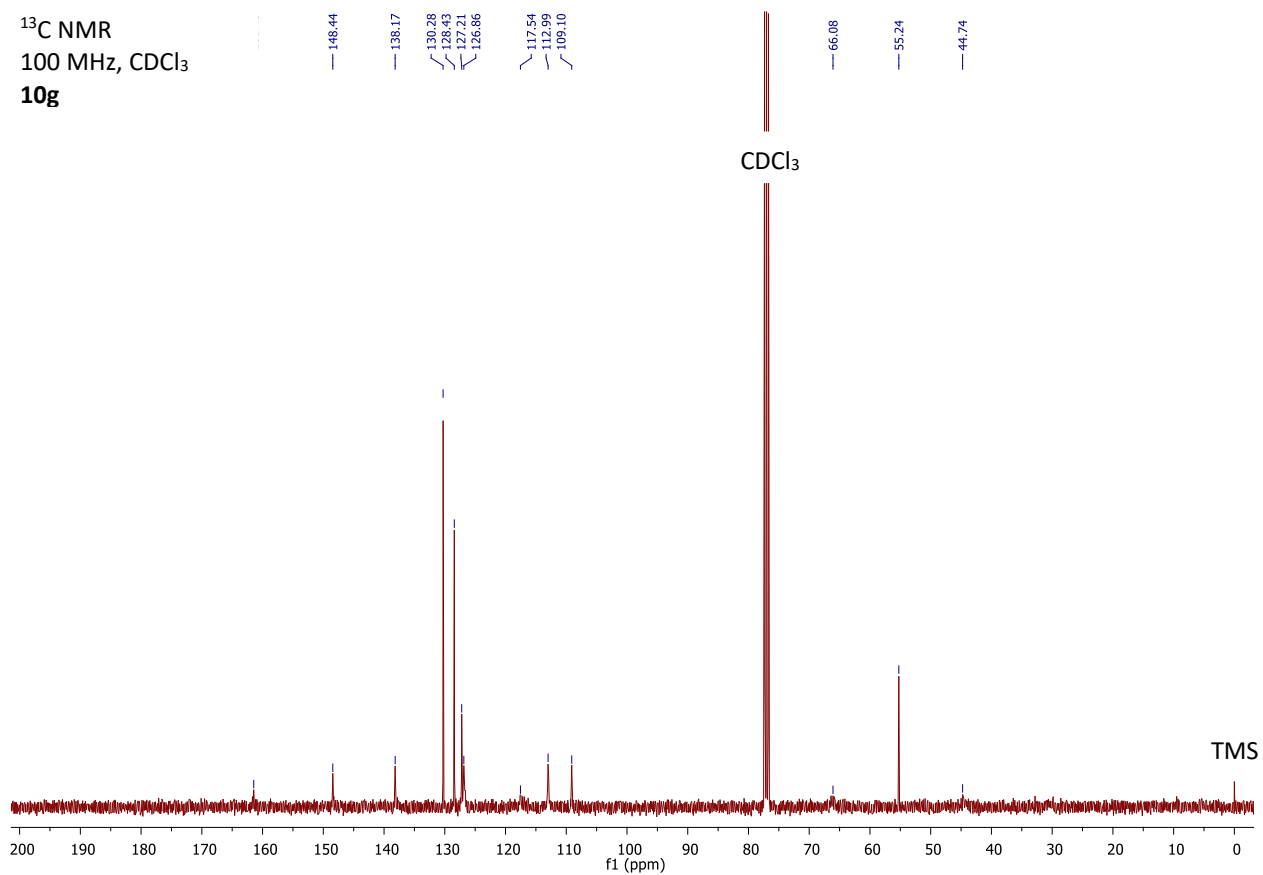

<sup>1</sup>H NMR  
500 MHz, CDCl<sub>3</sub>  
**9h**

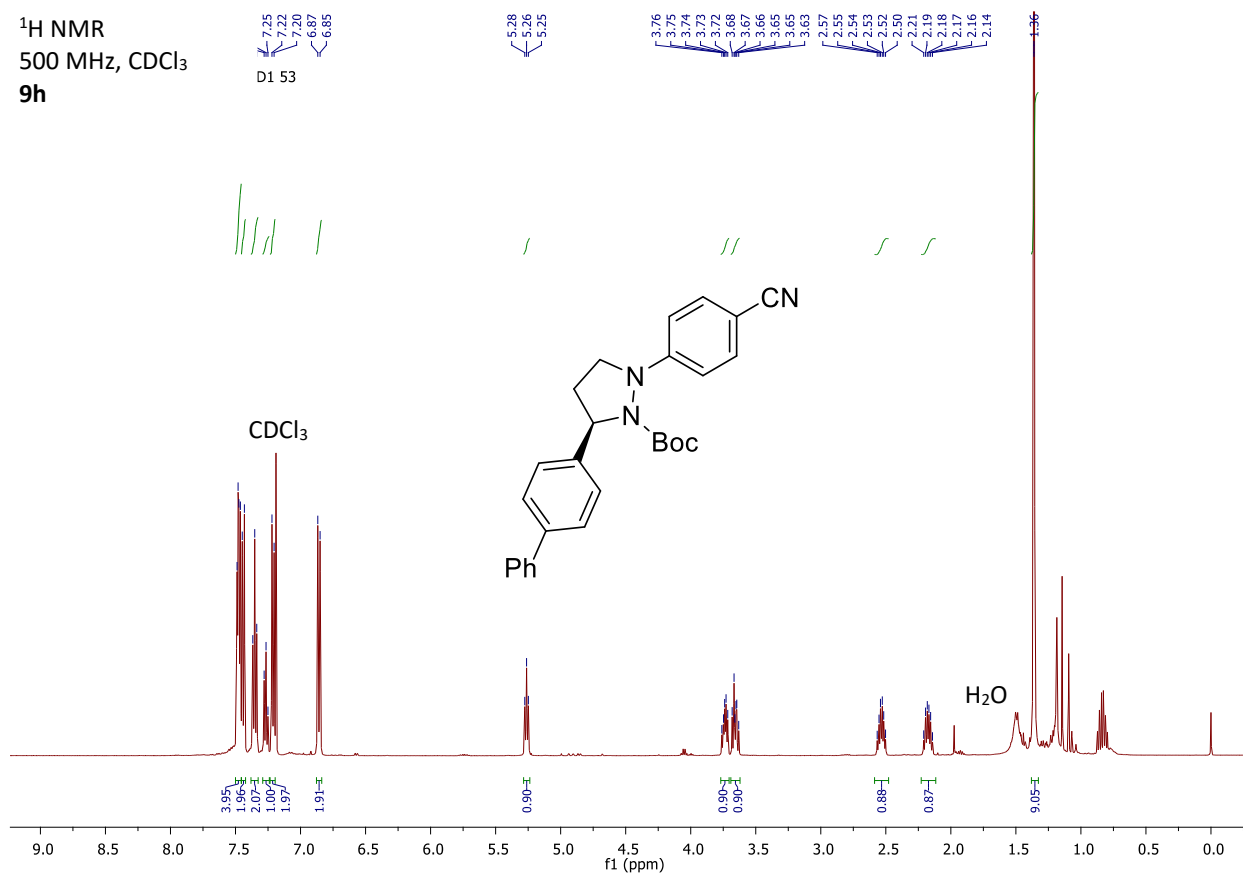

<sup>13</sup>C NMR  
125 MHz, CDCl<sub>3</sub>  
**9h**

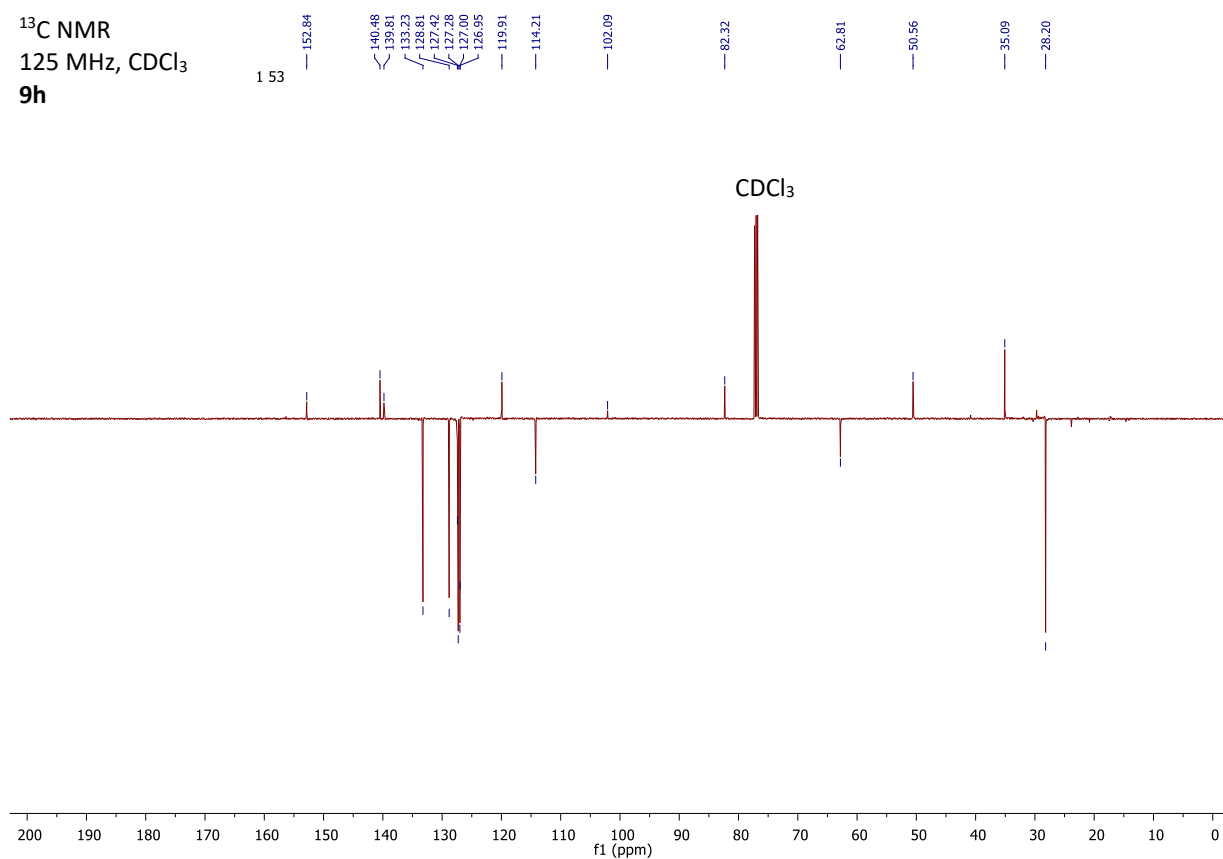

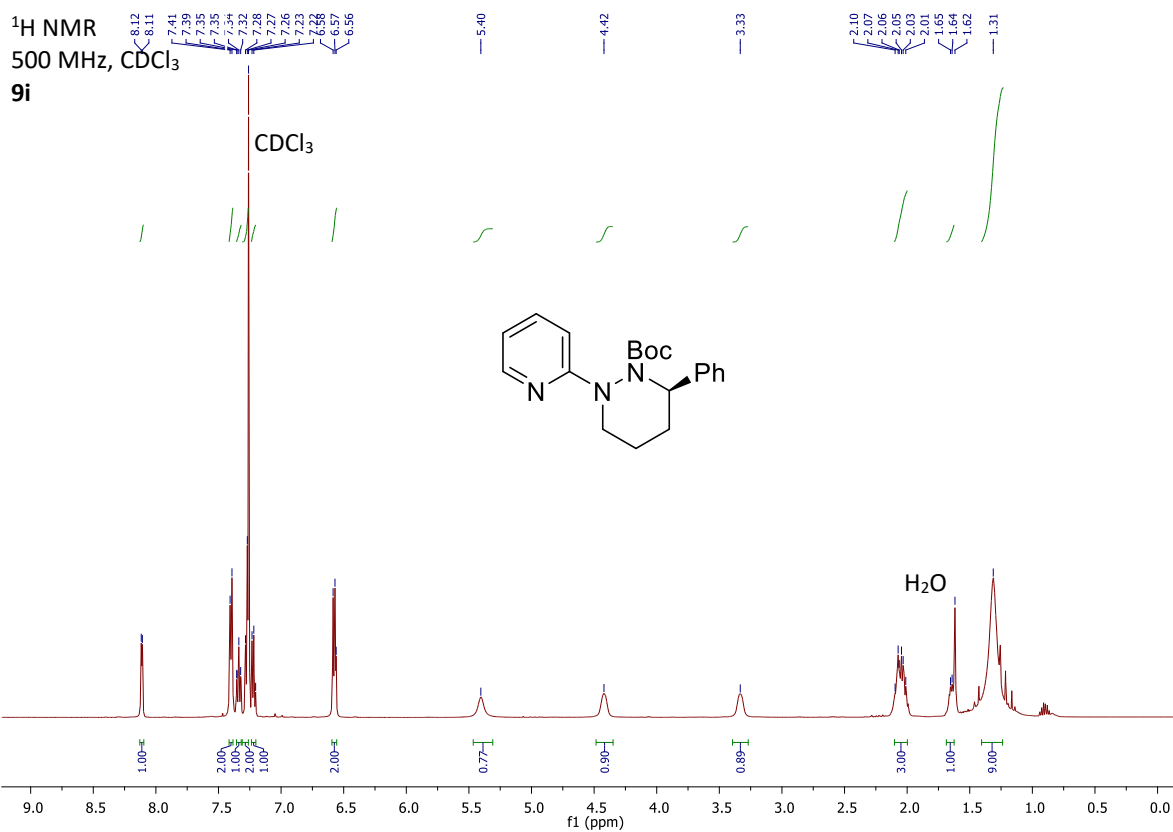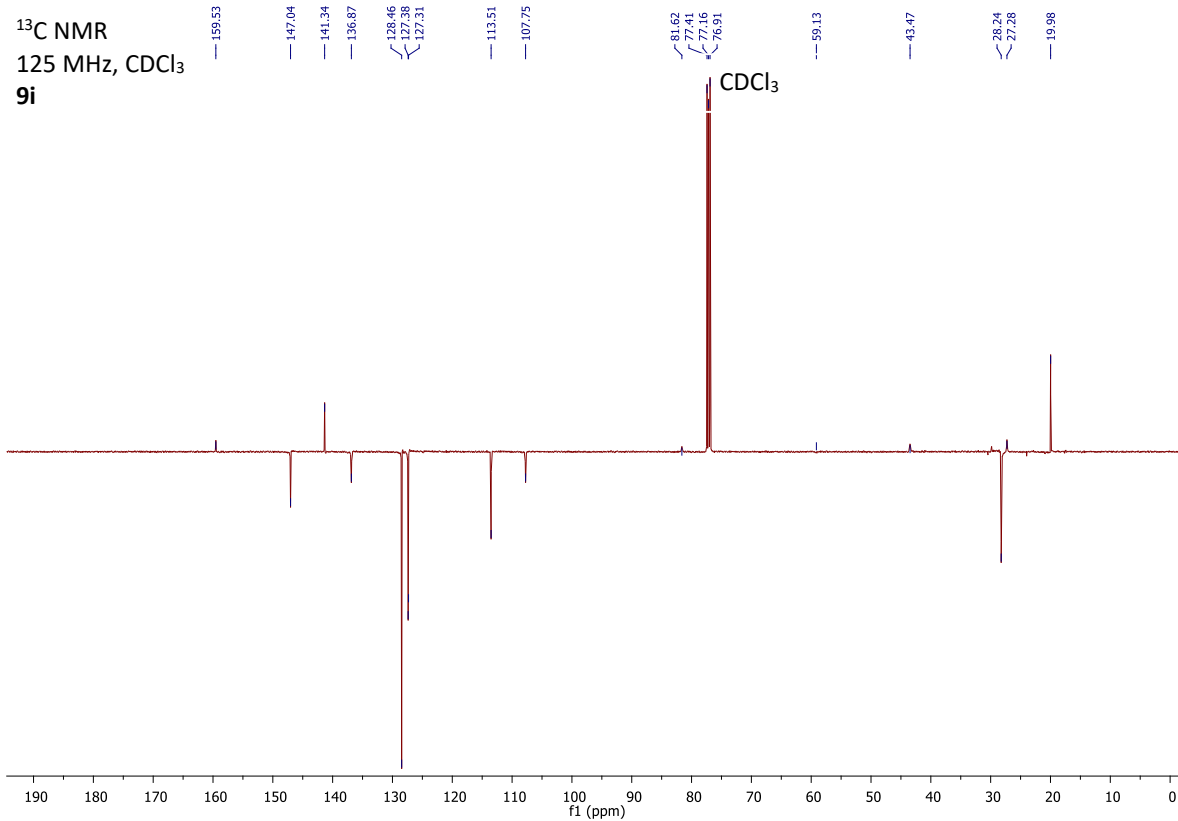

<sup>1</sup>H NMR  
400 MHz, CDCl<sub>3</sub>  
9m

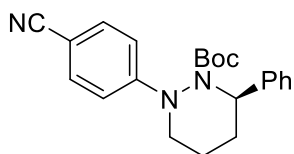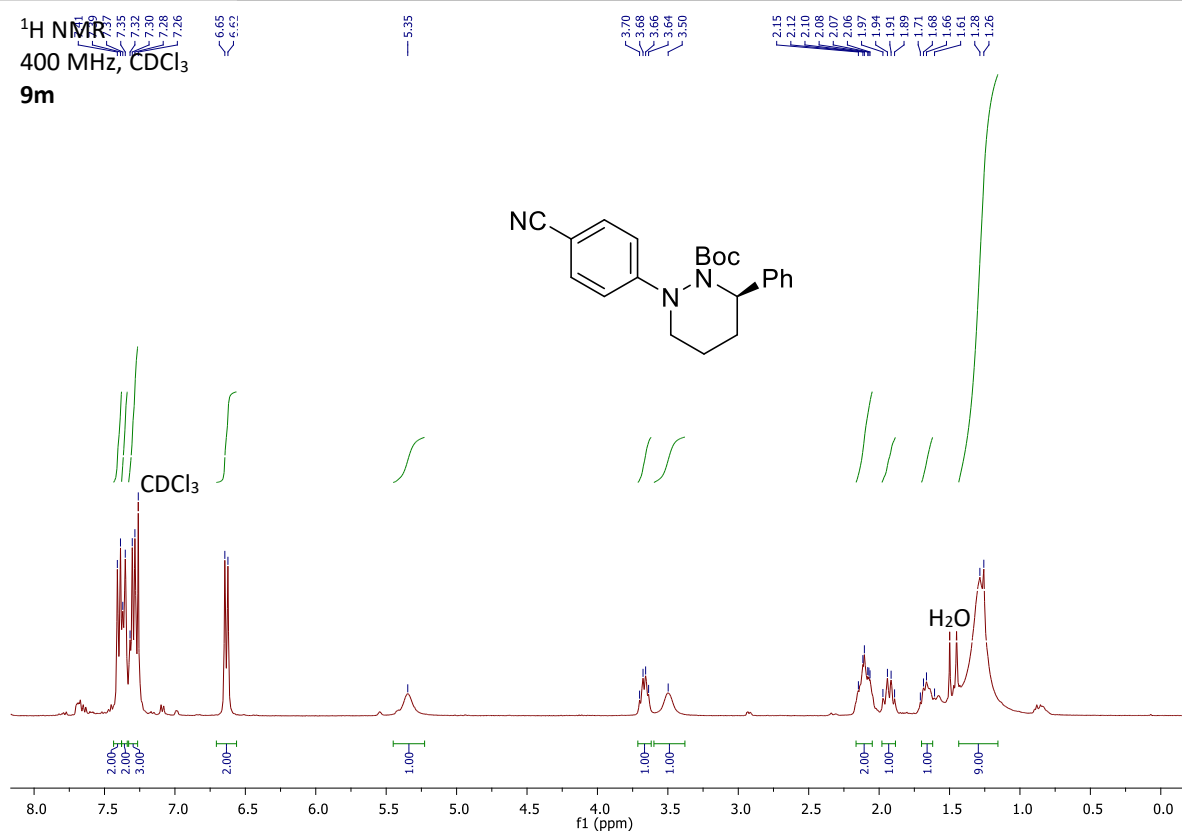

<sup>13</sup>C NMR  
125 MHz, CDCl<sub>3</sub>  
9m

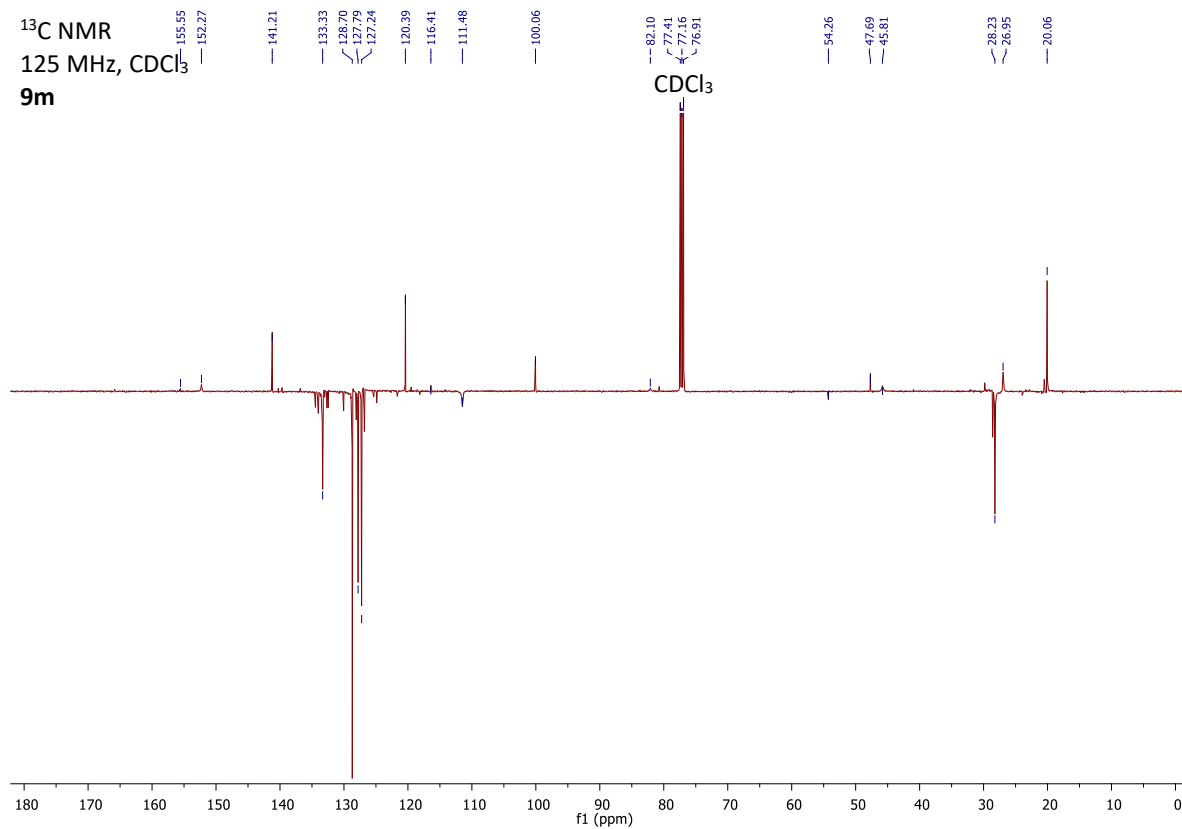

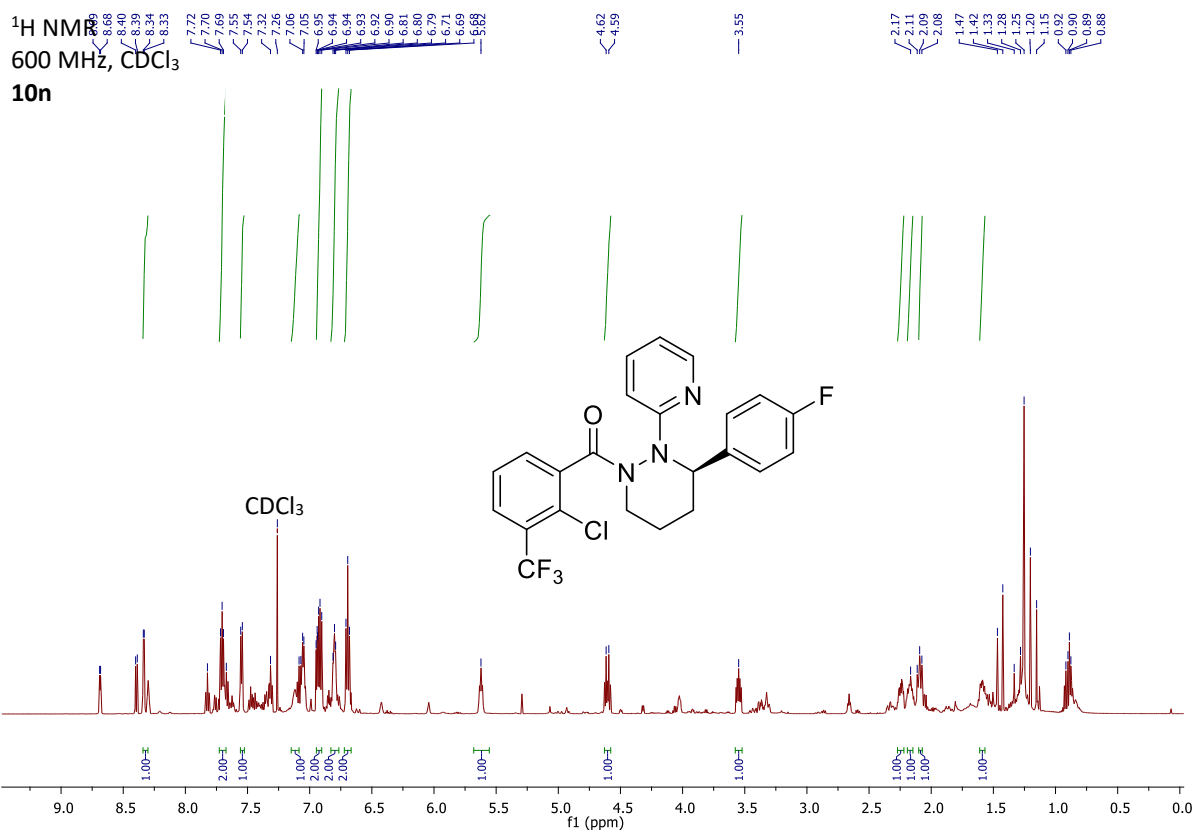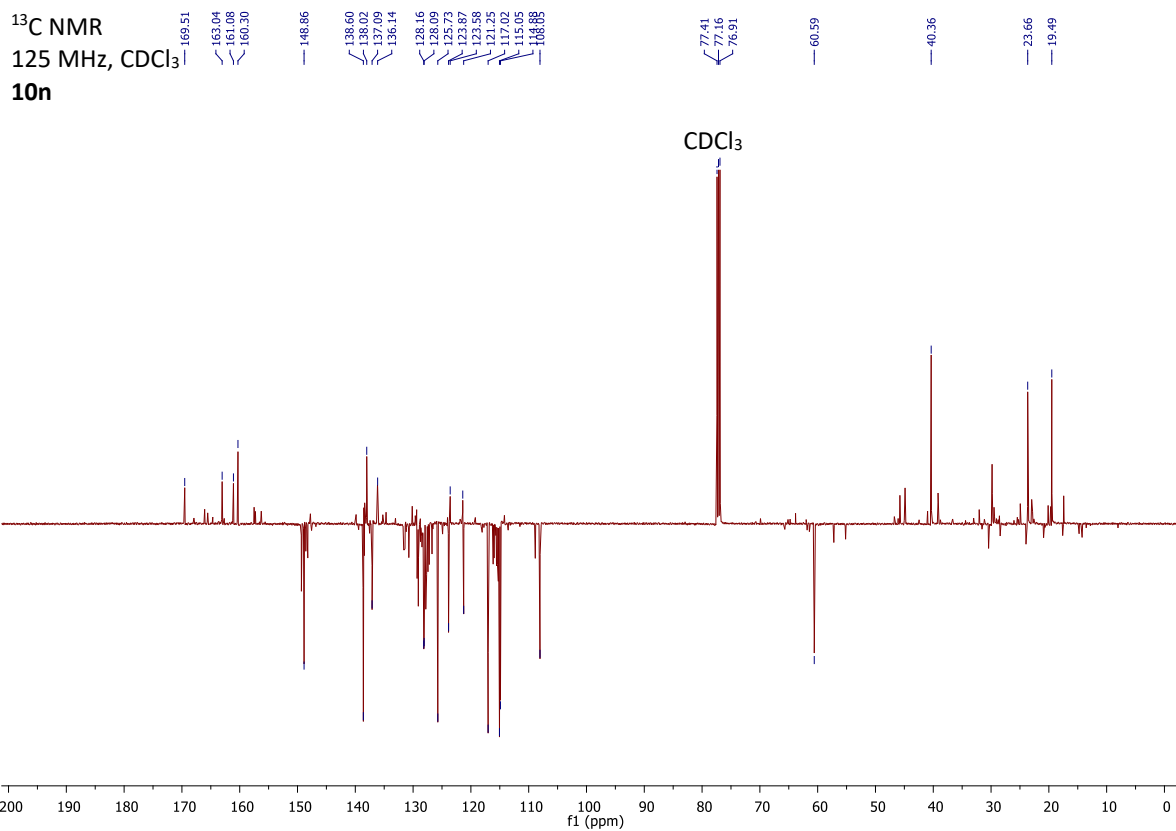

<sup>1</sup>H NMR  
500 MHz, CDCl<sub>3</sub>  
**9q**

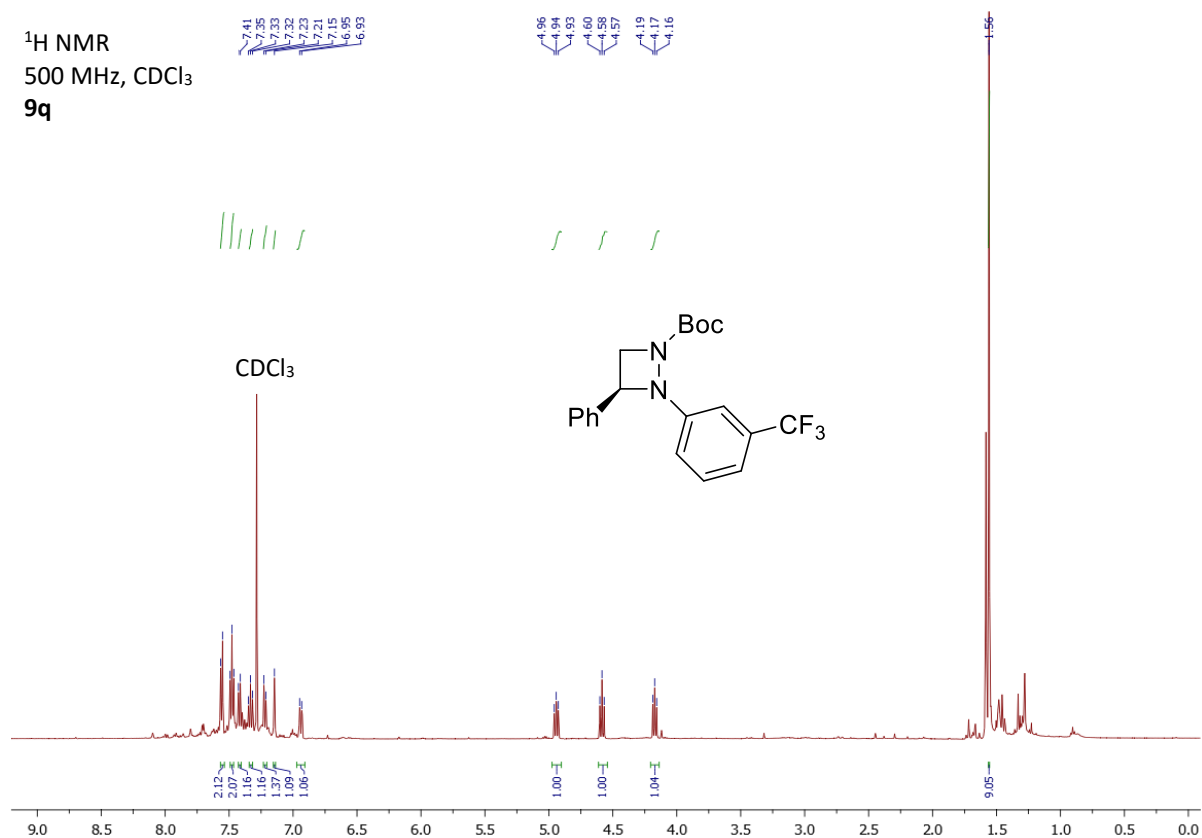

<sup>13</sup>C NMR  
125 MHz, CDCl<sub>3</sub>  
**9q**

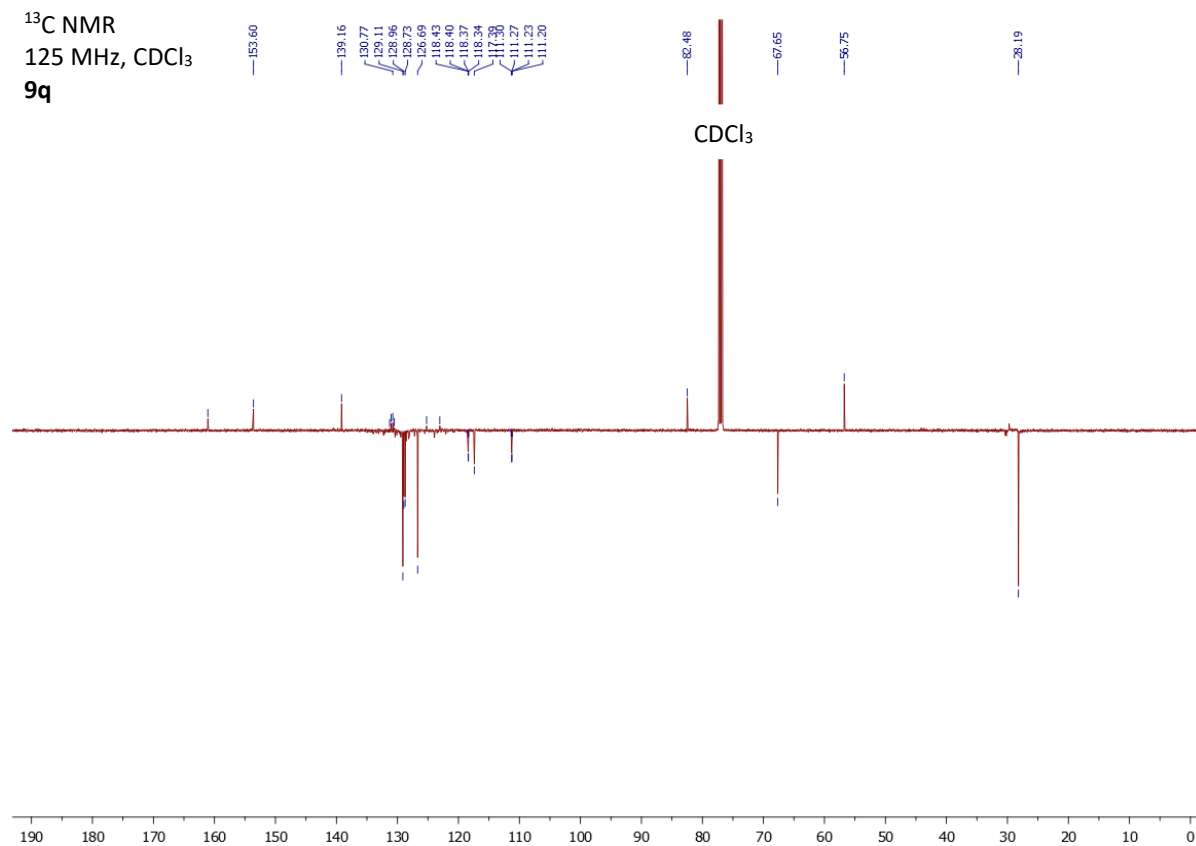



<sup>1</sup>H NMR  
500 MHz, CDCl<sub>3</sub>  
**10q**

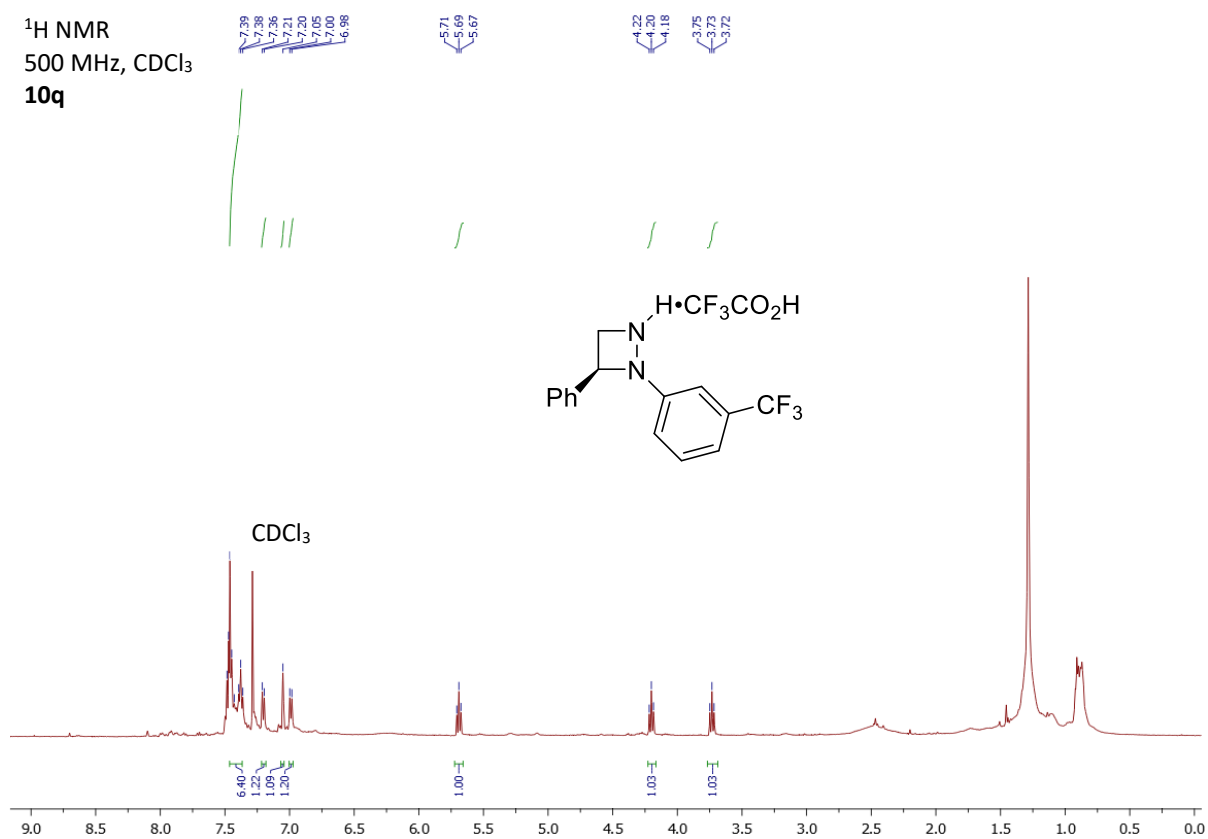

<sup>13</sup>C NMR  
125 MHz, CDCl<sub>3</sub>  
**10q**

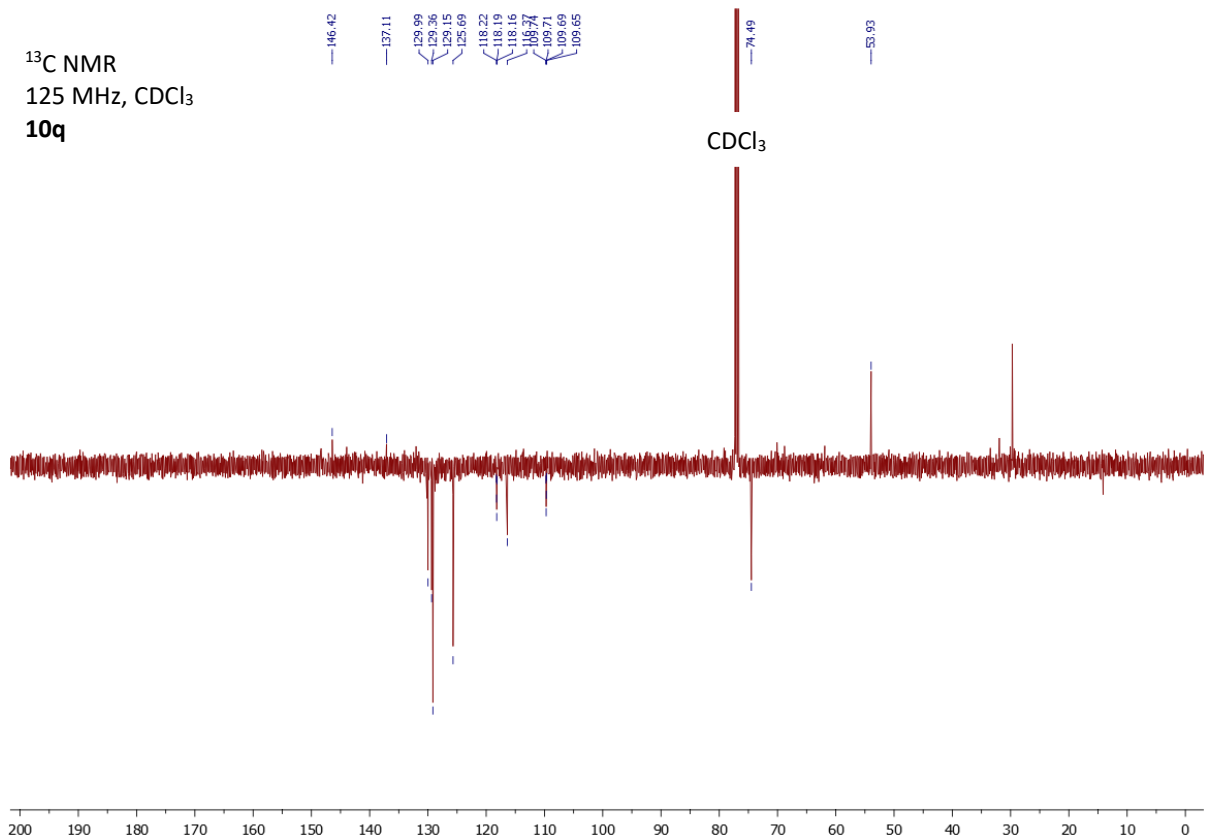

## Depiction of Single Crystal X-ray structures of 6a, 8d, 8h, 9i, 9m, 10a, 10b, 10l and 10o

**Single Crystal X-Ray Structure of 6a.** Single crystals of  $C_{23}H_{24}N_2O_5S$  were grown from a 9:1 mixture of hexane and isopropyl alcohol. A suitable crystal was selected and mounted on a glass fibre with Fomblin oil and placed on a Rigaku Oxford Diffraction SuperNova diffractometer with a duel source (Cu at zero) equipped with an AtlasS2 CCD area detector. The crystal was kept at 150(2) K during data collection. Crystal Data for  $C_{23}H_{24}N_2O_5S$  ( $M = 440.50$  g/mol): orthorhombic, space group  $P2_12_12$  (no. 18),  $a = 30.4605(6)$  Å,  $b = 11.6596(2)$  Å,  $c = 6.11590(10)$  Å,  $V = 2172.11(7)$  Å<sup>3</sup>,  $Z = 4$ ,  $T = 150(2)$  K,  $\mu(\text{CuK}\alpha) = 1.643$  mm<sup>-1</sup>,  $D_{\text{calc}} = 1.347$  g/cm<sup>3</sup>, 21406 reflections measured ( $5.802^\circ \leq 2\theta \leq 146.864^\circ$ ), 4351 unique ( $R_{\text{int}} = 0.0524$ ,  $R_{\text{sigma}} = 0.0377$ ) which were used in all calculations. The final  $R_1$  was 0.0362 ( $I > 2\sigma(I)$ ) and  $wR_2$  was 0.0904 (all data). Data has been deposited at the Cambridge Crystallographic Data Centre as CCDC 1944266.

Flack x: 0.004(13) Shelx2018, Hooft y: 0.005(10) Olex2. Both the Flack parameter and associated Hooft y parameter are small, so confidence in the handedness of the chiral centre is high.

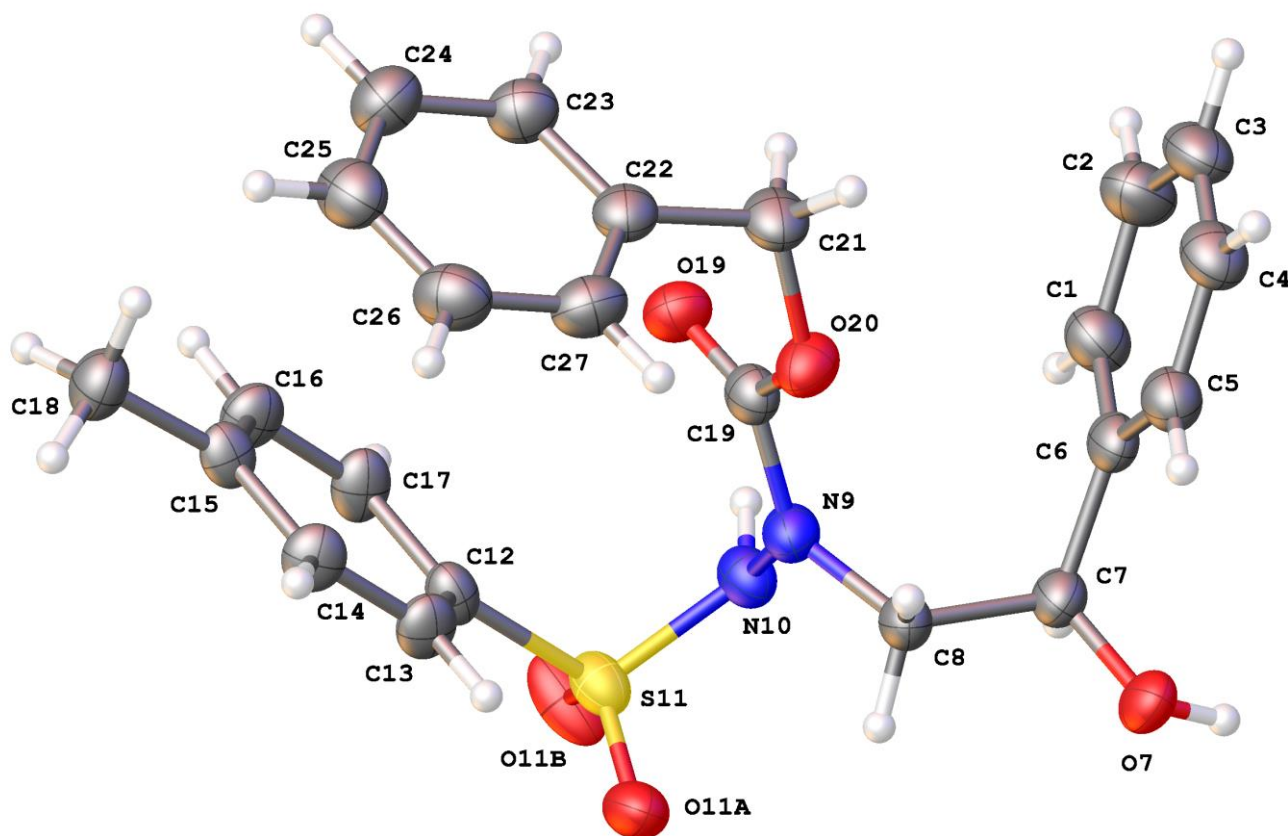

**Single Crystal X-Ray Structure of 8d.** Single crystals of  $C_{24}H_{21}F_3N_2O_4S$  were grown from a 9:1 ratio of hexane and isopropyl alcohol. A suitable crystal was selected and mounted on a glass fibre with Fomblin oil and placed on a Rigaku Oxford Diffraction SuperNova diffractometer with a duel source (Cu at zero) equipped with an AtlasS2 CCD area detector. The crystal was kept at 150(2) K during data collection. Crystal Data for  $C_{24}H_{21}F_3N_2O_4S$  ( $M = 490.49$  g/mol): orthorhombic, space group  $P2_12_12_1$  (no. 19),  $a = 32.8358(3)$  Å,  $b = 11.60538(10)$  Å,  $c = 5.85758(7)$  Å,  $V = 2232.16(4)$  Å<sup>3</sup>,  $Z = 4$ ,  $T = 150(2)$  K,  $\mu(\text{CuK}\alpha) = 1.827$  mm<sup>-1</sup>,  $D_{\text{calc}} = 1.460$  g/cm<sup>3</sup>, 72297 reflections measured ( $8.08^\circ \leq 2\theta \leq 147.05^\circ$ ), 4499 unique ( $R_{\text{int}} = 0.0917$ ,  $R_{\text{sigma}} = 0.0256$ ) which were used in all calculations. The final  $R_1$  was 0.0616 ( $I > 2\sigma(I)$ ) and  $wR_2$  was 0.1478 (all data). Data has been deposited at the Cambridge Crystallographic Data Centre as CCDC 1944267.

Flack x: 0.015(9) Shelx2018, Hooft y: 0.009(5) Olex2. Both the Flack parameter and associated Hooft y parameter are small, so confidence in the handedness of the chiral centre is high.

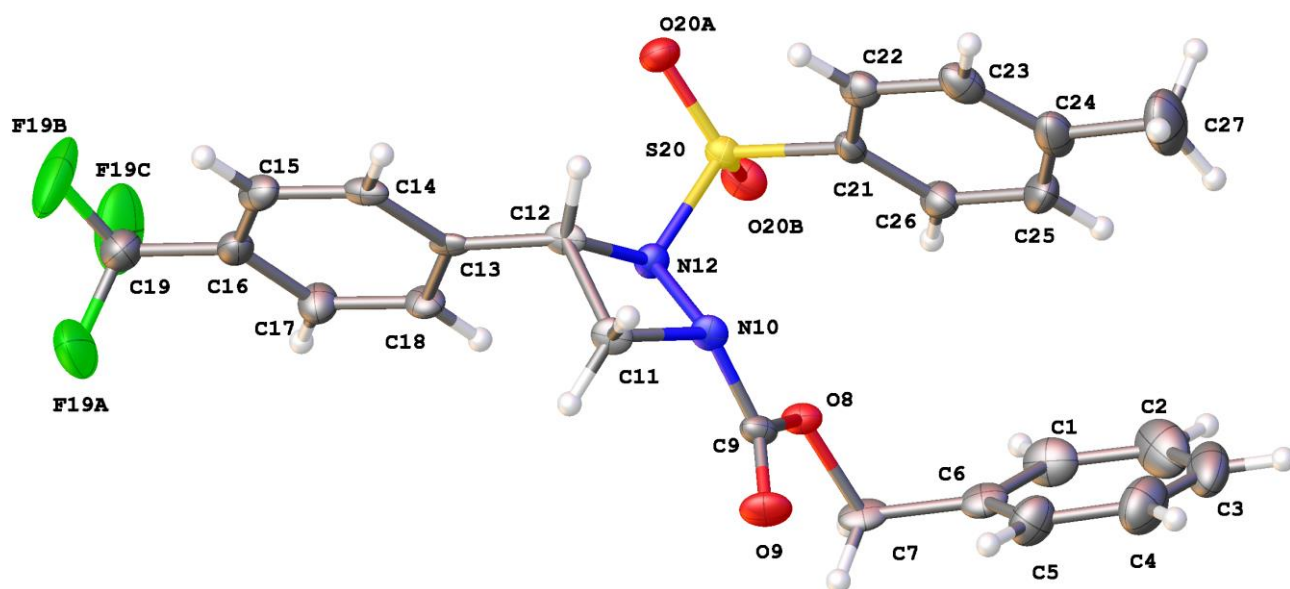

**Single Crystal X-Ray Structure of 8h.** Single crystals of  $C_{24}H_{24}N_2O_4S$  were grown from a 9:1 mix of hexane and isopropyl alcohol. A suitable crystal was selected and mounted on a Mitegen loop with Fomblin oil and placed on a Rigaku 007HF equipped with Varimax confocal mirrors and an AFC11 goniometer and HyPix 6000 detector. The crystal was kept at 100(2) K during data collection. Crystal Data for  $C_{24}H_{24}N_2O_4S$  ( $M = 436.51$  g/mol): orthorhombic, space group  $P2_12_12_1$  (no. 19),  $a = 6.0985(4)$  Å,  $b = 11.5023(5)$  Å,  $c = 30.8387(15)$  Å,  $V = 2163.2(2)$  Å<sup>3</sup>,  $Z = 4$ ,  $T = 100(2)$  K,  $\mu(\text{CuK}\alpha) = 1.610$  mm<sup>-1</sup>,  $D_{\text{calc}} = 1.340$  g/cm<sup>3</sup>, 17168 reflections measured ( $5.732^\circ \leq 2\theta \leq 136.448^\circ$ ), 3915 unique ( $R_{\text{int}} = 0.1033$ ,  $R_{\text{sigma}} = 0.0835$ ) which were used in all calculations. The final  $R_1$  was 0.0624 ( $I > 2\sigma(I)$ ) and  $wR_2$  was 0.1773 (all data). Data has been deposited at the Cambridge Crystallographic Data Centre as CCDC 1944268.

Flack x: -0.03(3) Shelx2018, Hooft y: -0.05(2) Olex2. Both the Flack parameter and associated Hooft y parameter are small, so confidence in the handedness of the chiral centre is high.

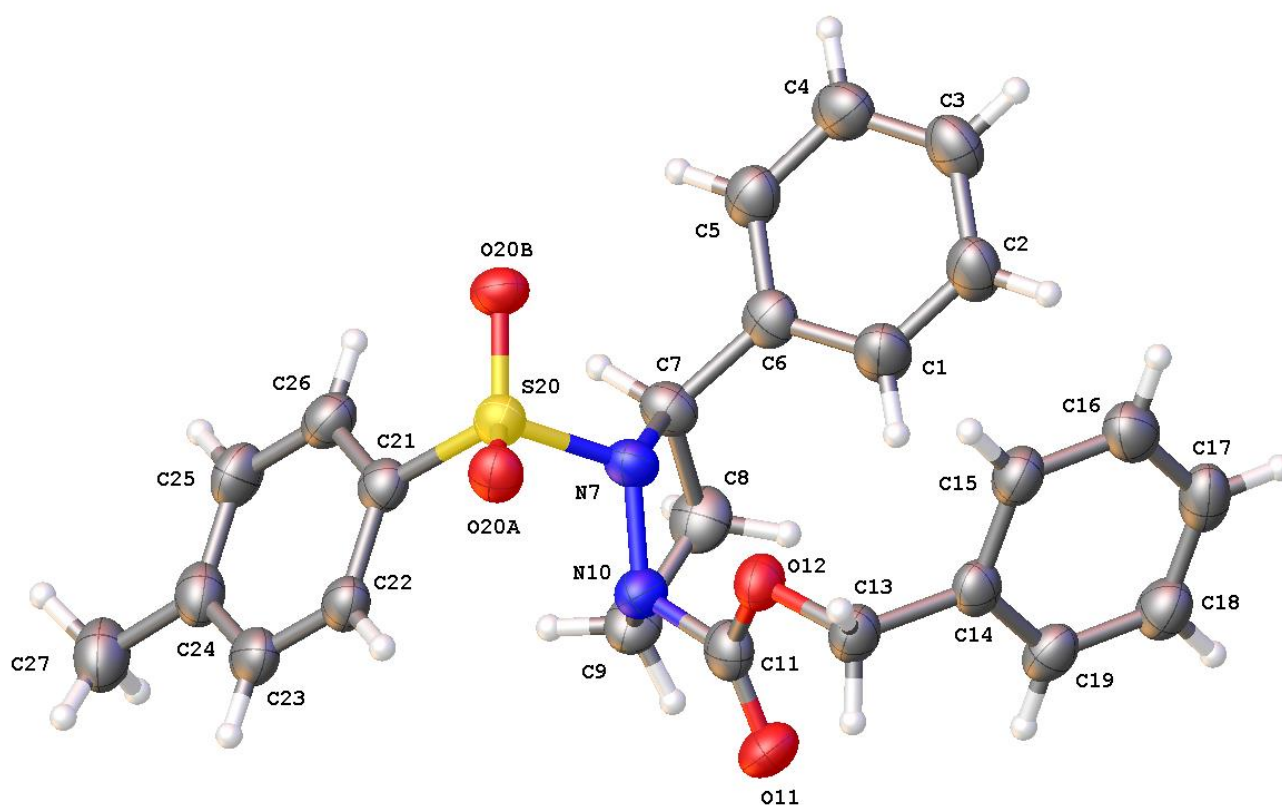

**Single Crystal X-Ray Structure of 10a.** Single crystals of  $C_{44}H_{42.5}N_6O_{4.25}$  were grown from a 9:1 mix of hexane and isopropanol. A suitable crystal was selected and mounted on a glass fibre with Fomblin oil and placed on a Rigaku Oxford Diffraction SuperNova diffractometer with a duel source (Cu at zero) equipped with an AtlasS2 CCD area detector. The crystal was kept at 150(2) K during data collection. Crystal Data for  $C_{44}H_{42.5}N_6O_{4.25}$  ( $M = 723.34$  g/mol): monoclinic, space group  $P2_1$  (no. 4),  $a = 10.18405(5)$  Å,  $b = 9.71457(5)$  Å,  $c = 18.82762(9)$  Å,  $\beta = 93.0169(4)^\circ$ ,  $V = 1860.102(16)$  Å<sup>3</sup>,  $Z = 2$ ,  $T = 150(2)$  K,  $\mu(\text{CuK}\alpha) = 0.679$  mm<sup>-1</sup>,  $D_{\text{calc}} = 1.291$  g/cm<sup>3</sup>, 35330 reflections measured ( $8.694^\circ \leq 2\theta \leq 147.052^\circ$ ), 7385 unique ( $R_{\text{int}} = 0.0176$ ,  $R_{\text{sigma}} = 0.0104$ ) which were used in all calculations. The final  $R_1$  was 0.0257 ( $I > 2\sigma(I)$ ) and  $wR_2$  was 0.0682 (all data). Data has been deposited at the Cambridge Crystallographic Data Centre as CCDC 1944269.

Flack x: -0.05(3) Shelx2018, Hooft y: -0.045(2) Olex2. Both the Flack parameter and associated Hooft y parameter are relatively small for a structure with no heavy atoms, so confidence in the handedness of the chiral centre is high.

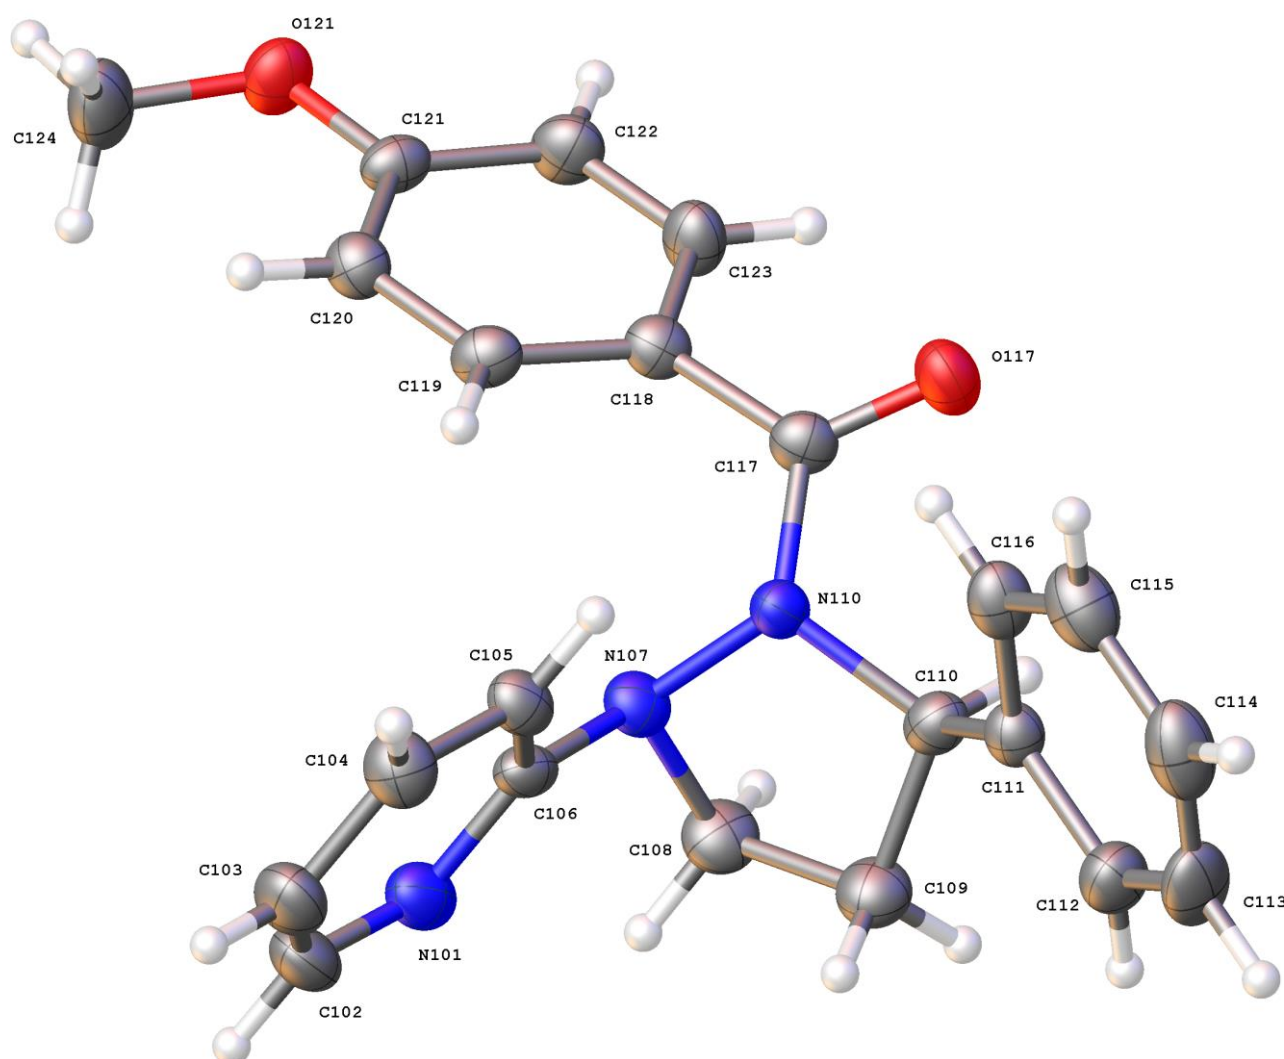

**Single Crystal X-Ray Structure of rac-10b.** Single crystals of  $C_{20}H_{23}N_3O_3$  were grown from 9:1 hexane and isopropanol. A suitable crystal was selected and mounted on a glass fibre with Fomblin oil and placed on a Rigaku Oxford Diffraction SuperNova diffractometer with a dual source (Cu at zero) equipped with an AtlasS2 CCD area detector. The crystal was kept at 150(2) K during data collection. Using Olex2, the structure was solved with the ShelXT structure solution program using Intrinsic Phasing and refined with the ShelXL refinement package using Least Squares minimisation. Crystal Data for  $C_{20}H_{23}N_3O_3$  ( $M=353.41$  g/mol): orthorhombic, space group  $P2_12_12_1$  (no. 19),  $a = 7.19100(10)$  Å,  $b = 13.50450(10)$  Å,  $c = 18.6644(2)$  Å,  $V = 1812.52(3)$  Å<sup>3</sup>,  $Z = 4$ ,  $T = 150(2)$  K,  $\mu(\text{CuK}\alpha) = 0.716$  mm<sup>-1</sup>,  $D_{\text{calc}} = 1.295$  g/cm<sup>3</sup>, 10496 reflections measured ( $8.082^\circ \leq 2\theta \leq 147.174^\circ$ ), 3514 unique ( $R_{\text{int}} = 0.0227$ ,  $R_{\text{sigma}} = 0.0229$ ) which were used in all calculations. The final  $R_1$  was 0.0325 ( $I > 2\sigma(I)$ ) and  $wR_2$  was 0.1083 (all data). Data has been deposited at the Cambridge Crystallographic Data Centre as CCDC 1944270.

As the crystal was grown from a racemate the Flack parameter was not determined.

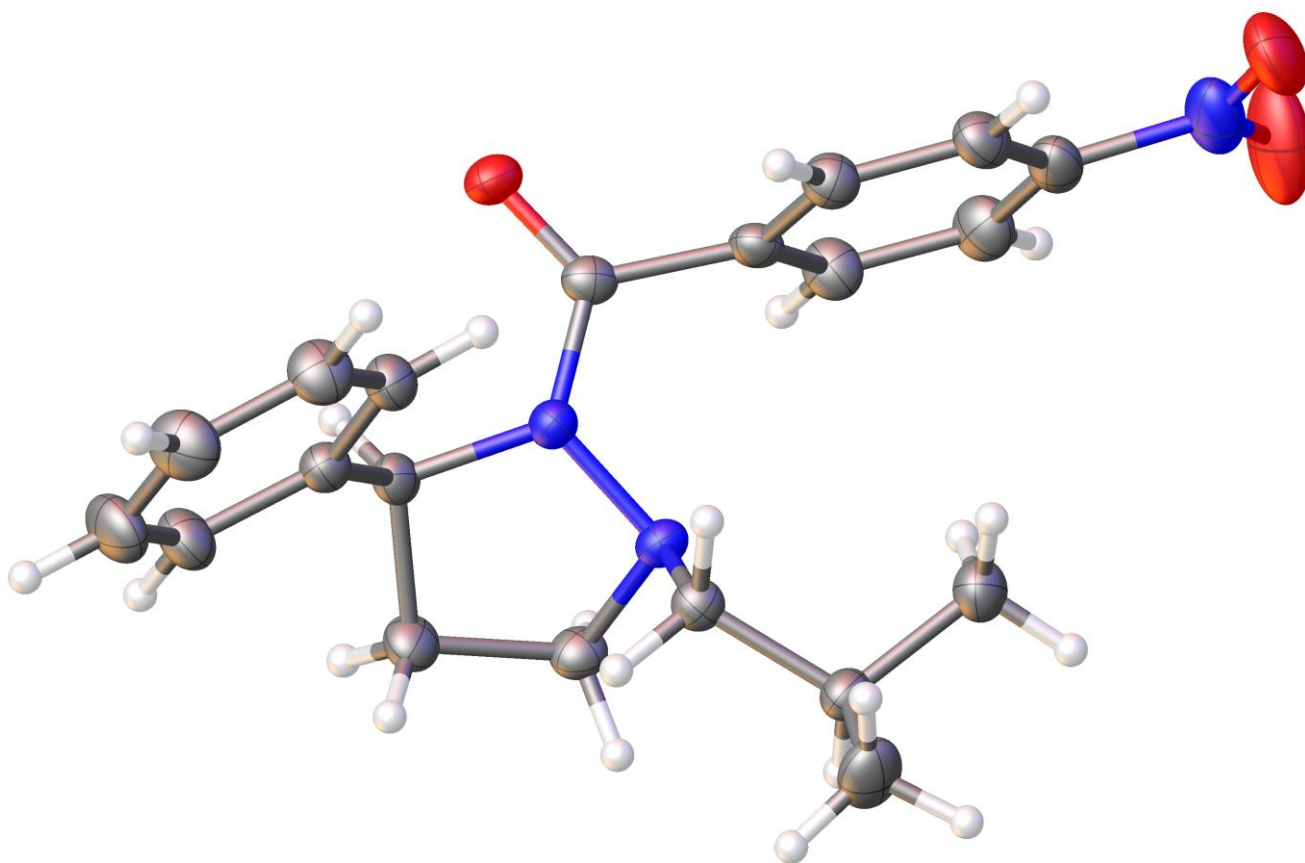



**Single crystal X-Ray structure of 10l.** Single crystals of  $C_{20}H_{19}N_3O$  were grown from ethyl acetate. A suitable crystal was selected and mounted on a glass fibre with Fomblin oil and placed on a Rigaku Oxford Diffraction SuperNova diffractometer with a dual source (Cu at zero) equipped with an AtlasS2 CCD area detector. The crystal was kept at 150(2) K during data collection. Crystal Data for  $C_{20}H_{19}N_3O$  ( $M=317.38$  g/mol): monoclinic, space group  $P2_1$  (no. 4),  $a = 10.10659(11)$  Å,  $b = 5.94958(5)$  Å,  $c = 13.62038(10)$  Å,  $\beta = 99.5974(8)^\circ$ ,  $V = 807.530(13)$  Å<sup>3</sup>,  $Z = 2$ ,  $T = 150.00(10)$  K,  $\mu(\text{CuK}\alpha) = 0.652$  mm<sup>-1</sup>,  $D_{\text{calc}} = 1.305$  g/cm<sup>3</sup>, 15974 reflections measured ( $6.582^\circ \leq 2\theta \leq 147.044^\circ$ ), 3240 unique ( $R_{\text{int}} = 0.0310$ ,  $R_{\text{sigma}} = 0.0200$ ) which were used in all calculations. The final  $R_1$  was 0.0274 ( $I > 2\sigma(I)$ ) and  $wR_2$  was 0.0705 (all data). Data has been deposited at the Cambridge Crystallographic Data Centre as CCDC 1944272.

Flack x: -0.00(8) Shelx2018, Hooft y: -0.04(8) Olex2. Both the Flack parameter and associated Hooft y parameter are small, so confidence in the handedness of the chiral centre is high.

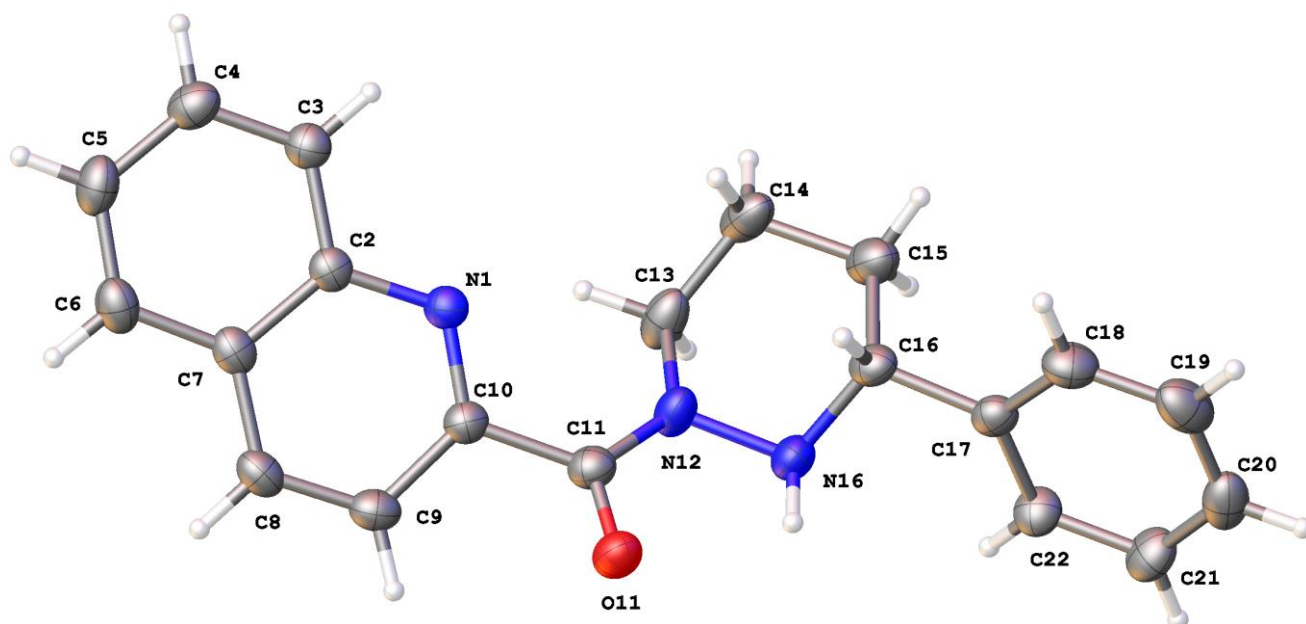

**Single crystal X-Ray structure of 9m.** Single crystals of  $C_{22}H_{25}N_3O_2$  were grown from chloroform. A suitable crystal was selected and mounted on a glass fibre with Fomblin oil and placed on a Rigaku Oxford Diffraction SuperNova diffractometer with a dual source (Cu at zero) equipped with an AtlasS2 CCD area detector. The crystal was kept at 150(2) K during data collection. Using Olex2, the structure was solved with the ShelXT structure solution program using Intrinsic Phasing and refined with the ShelXL refinement package using Least Squares minimisation. Crystal data for  $C_{22}H_{25}N_3O_2$  ( $M = 363.45$  g/mol): monoclinic, space group  $P2_1$  (no. 4),  $a = 12.47130(5)$  Å,  $b = 9.02632(4)$  Å,  $c = 17.84198(7)$  Å,  $\beta = 92.8702(4)^\circ$ ,  $V = 2005.951(14)$  Å<sup>3</sup>,  $Z = 4$ ,  $T = 150(2)$  K,  $\mu(\text{CuK}\alpha) = 0.622$  mm<sup>-1</sup>,  $D_{\text{calc}} = 1.203$  g/cm<sup>3</sup>, 60499 reflections measured ( $7.096^\circ \leq 2\theta \leq 147.262^\circ$ ), 8067 unique ( $R_{\text{int}} = 0.0352$ ,  $R_{\text{sigma}} = 0.0200$ ) which were used in all calculations. The final  $R_1$  was 0.0280 ( $I > 2\sigma(I)$ ) and  $wR_2$  was 0.0743 (all data). Data has been deposited at the Cambridge Crystallographic Data Centre as CCDC 1944271.

Flack x: -0.01(6) Shelx2018, Hooft y: -0.01(3) Olex2. Both the Flack parameter and associated Hooft y parameter are small, so confidence in the handedness of the chiral centre is high.

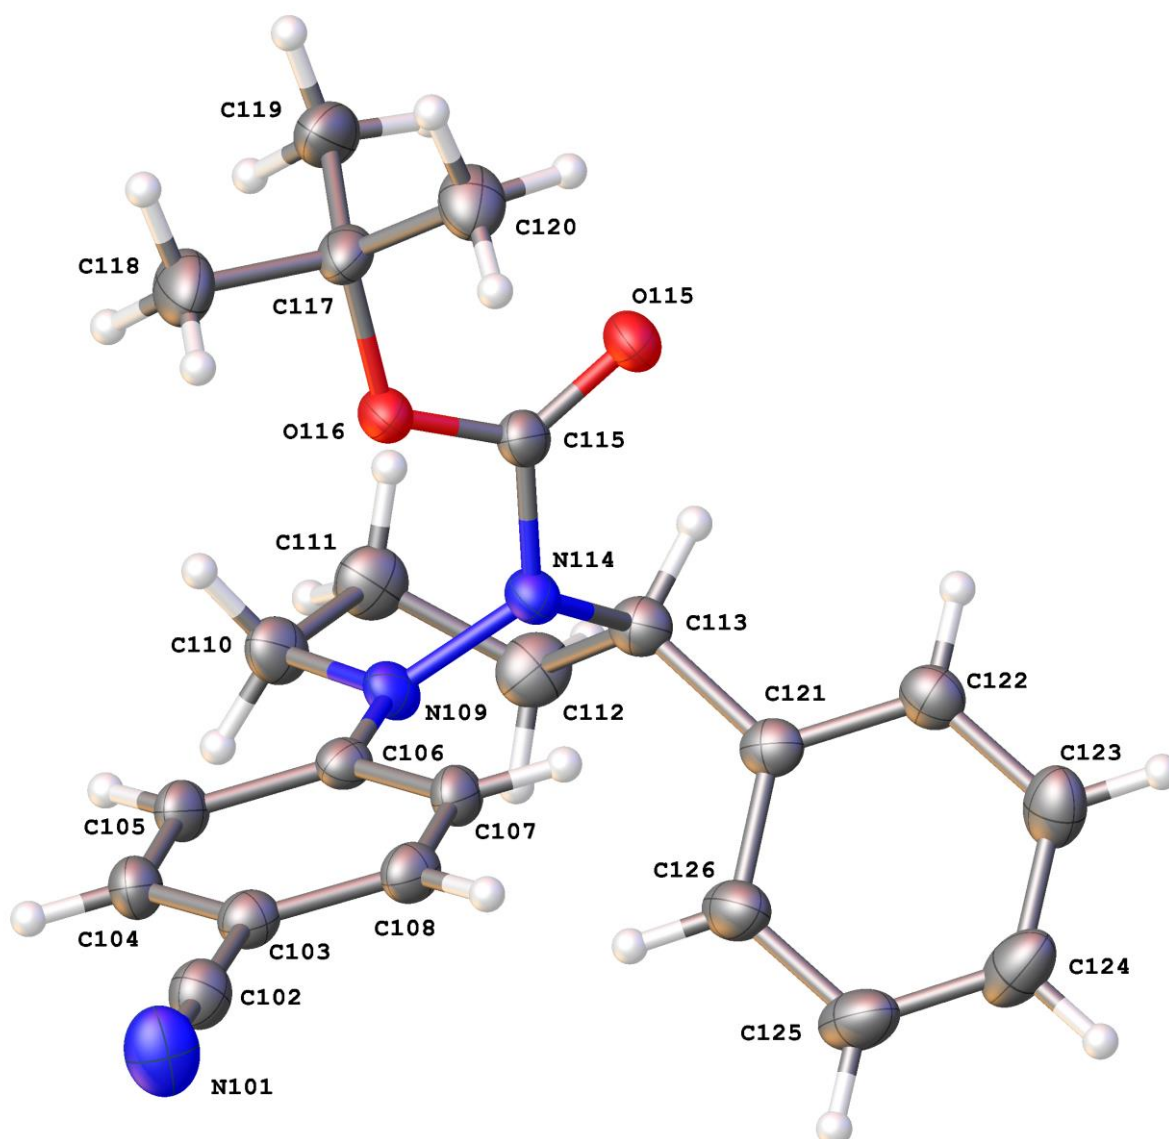



**Single crystal X-Ray structure of rac-9i.** Single crystals of  $C_{20}H_{25}N_3O_2$  were grown from chloroform. A suitable crystal was selected and mounted on a glass fibre with Fomblin oil and placed on a Rigaku Oxford Diffraction SuperNova diffractometer with a dual source (Cu at zero) equipped with an AtlasS2 CCD area detector. The crystal was kept at 150(2) K during data collection. Using Olex2, the structure was solved with the ShelXT structure solution program using Intrinsic Phasing and refined with the ShelXL refinement package using Least Squares minimisation. Crystal data for  $C_{20}H_{25}N_3O_2$  ( $M = 339.43$  g/mol): monoclinic, space group  $P2_1/n$  (no. 14),  $a = 6.81180(10)$  Å,  $b = 17.54950(10)$  Å,  $c = 15.11130(10)$  Å,  $\beta = 91.4270(10)^\circ$ ,  $V = 1805.90(3)$  Å<sup>3</sup>,  $Z = 4$ ,  $T = 150(2)$  K,  $\mu(\text{CuK}\alpha) = 0.652$  mm<sup>-1</sup>,  $D_{\text{calc}} = 1.248$  g/cm<sup>3</sup>, 15714 reflections measured ( $7.722^\circ \leq 2\theta \leq 147.218^\circ$ ), 3594 unique ( $R_{\text{int}} = 0.0208$ ,  $R_{\text{sigma}} = 0.0152$ ) which were used in all calculations. The final  $R_1$  was 0.0330 ( $I > 2\sigma(I)$ ) and  $wR_2$  was 0.0846 (all data). Data has been deposited at the Cambridge Crystallographic Data Centre as CCDC 1944273.

As the crystal was grown from a racemate the Flack parameter was not determined.

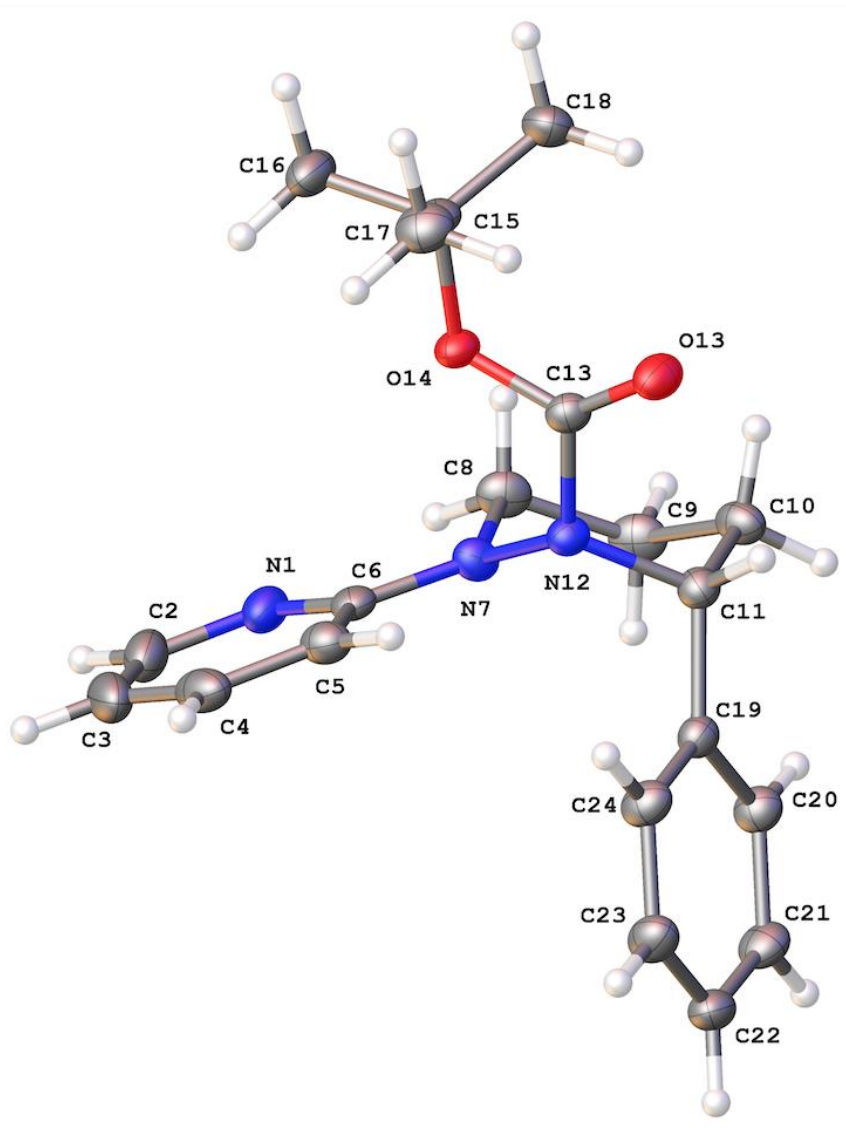

**Single crystal X-Ray structure of 10o.** Single crystals of  $C_{28}H_{30}N_2O_2$  were grown from MeOH. A suitable crystal was selected and mounted on a glass fibre with Fomblin oil and placed on a Rigaku Oxford Diffraction SuperNova diffractometer with a dual source (Cu at zero) equipped with an AtlasS2 CCD area detector. The crystal was kept at 150(2) K during data collection. Using Olex2, the structure was solved with the ShelXT structure solution program using Intrinsic Phasing and refined with the ShelXL [3] refinement package using Least Squares minimisation. Crystal Data for  $C_{28}H_{30}N_2O_2$  ( $M=426.54$  g/mol): orthorhombic, space group  $P2_12_12_1$  (no. 19),  $a = 8.33247(2)$  Å,  $b = 15.71709(6)$  Å,  $c = 17.93381(5)$  Å,  $V = 2348.651(13)$  Å<sup>3</sup>,  $Z = 4$ ,  $T = 150(2)$  K,  $\mu(\text{CuK}\alpha) = 0.595$  mm<sup>-1</sup>,  $D_{\text{calc}} = 1.206$  g/cm<sup>3</sup>, 70707 reflections measured ( $7.48^\circ \leq 2\theta \leq 147.328^\circ$ ), 4736 unique ( $R_{\text{int}} = 0.0275$ ,  $R_{\text{sigma}} = 0.0106$ ) which were used in all calculations. The final  $R_1$  was 0.0277 ( $I > 2\sigma(I)$ ) and  $wR_2$  was 0.0705 (all data). Data has been deposited at the Cambridge Crystallographic Data Centre as CCDC 1955341.

Flack x: 0.01(3) Shelx2018, Hooft y: 0.02(3) Olex2. Both the Flack parameter and associated Hooft y parameter are small, so confidence in the handedness of the chiral centre is high.

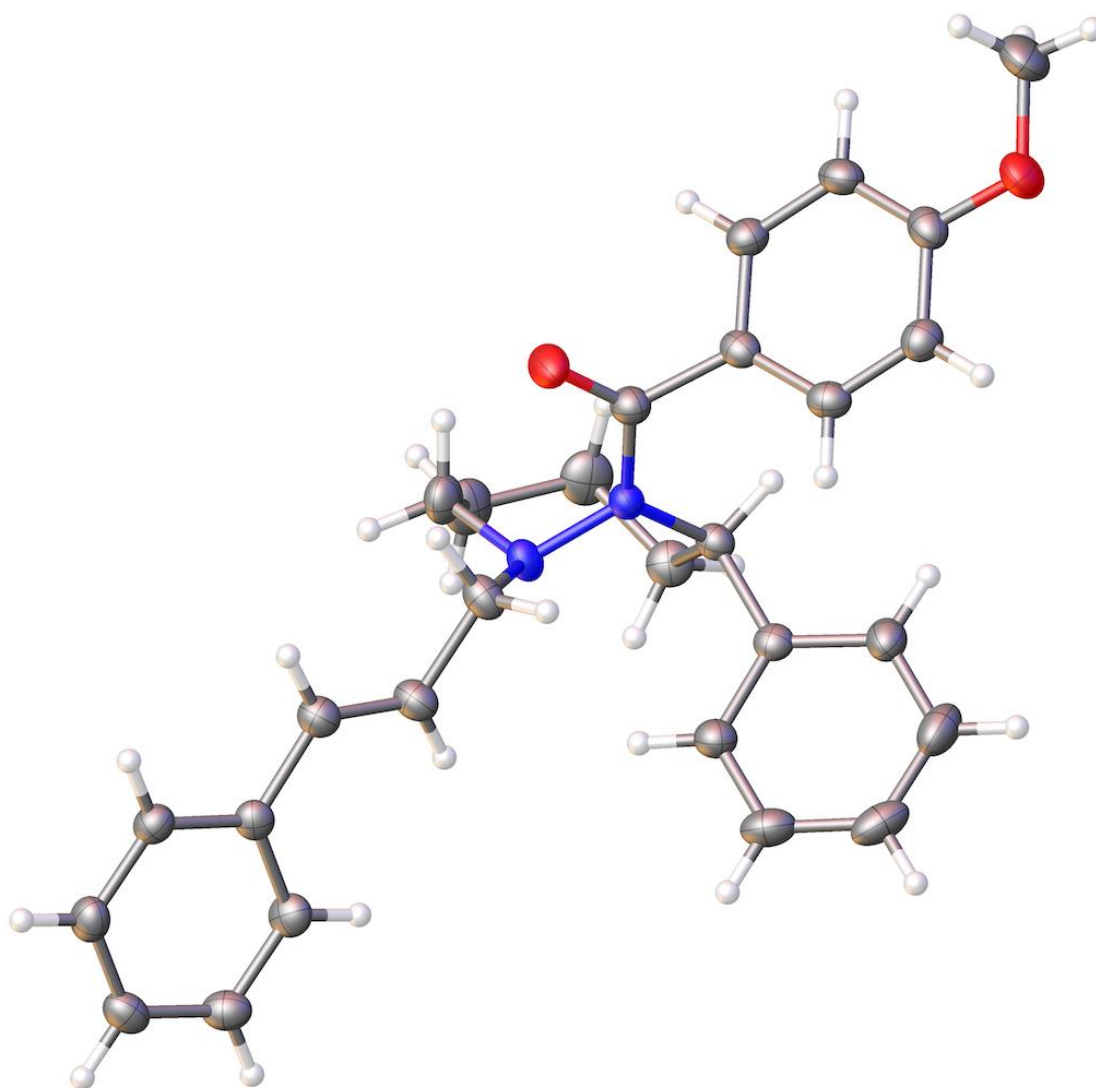

## LLAMA, NOESY and VT NMR Data

### LLAMA Data – for PMI Plot

LLAMA (Lead Likeness And Molecular Analysis – see <https://llama.leeds.ac.uk/> for more information<sup>[12]</sup>) was used to generate the PMI plot. The structures **10a-q** were uploaded to a new database, which then automatically analysed their molecular shape. This tool randomly selects a number of 3D-conformers for each molecule, minimises their energy and selects the lowest-energy one (see page **S224-S226**). LLAMA then calculates the moments of inertia in the x, y and z axes. The PMI I1 coordinates are calculated by dividing inertia(x) by inertia(z). The I2 coordinates are calculated by dividing inertia(y) by inertia(z). The raw data was exported as a csv file and then processed using Microsoft Excel to give the following data table:

| Compound | PMI x<br>(I1) | PMI y<br>(I2) |
|----------|---------------|---------------|
| 10a      | 0.44197       | 0.71524       |
| 10b      | 0.38056       | 0.78138       |
| 10c      | 0.51087       | 0.93768       |
| 10d      | 0.51368       | 0.78822       |
| 10e      | 0.40762       | 0.76545       |
| 10f      | 0.14534       | 0.94549       |
| 10g      | 0.27492       | 0.87452       |
| 10h      | 0.14647       | 0.98991       |
| 10i      | 0.46902       | 0.83825       |
| 10j      | 0.34134       | 0.94557       |
| 10k      | 0.42656       | 0.79292       |
| 10l      | 0.16026       | 0.95099       |
| 10m      | 0.29528       | 0.87679       |
| 10n      | 0.3883        | 0.87605       |
| 10o      | 0.25736       | 0.8502        |
| 10p      | 0.64152       | 0.74401       |
| 10q      | 0.35298       | 0.776         |
| Average  | 0.363         | 0.855         |

This raw data was then used to generate a scatter plot (**Figure 5** in main paper).

## LLAMA Structures for 10a-q

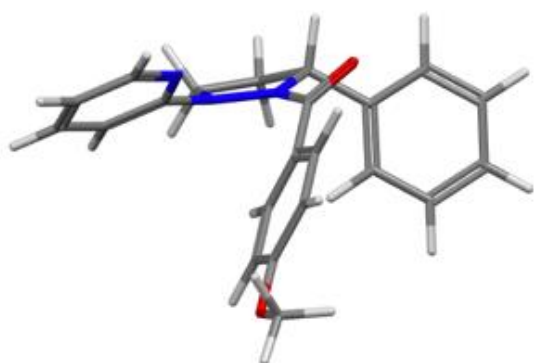

10a

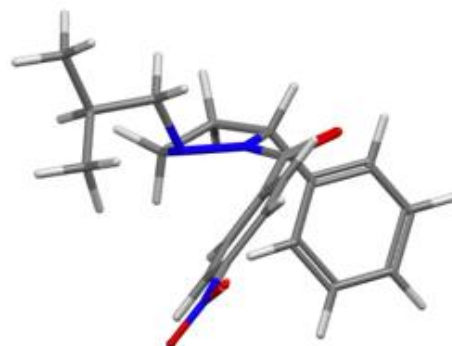

10b

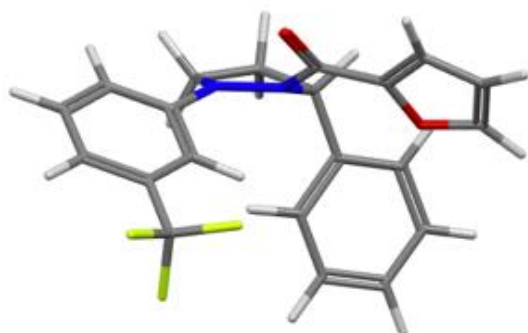

10c

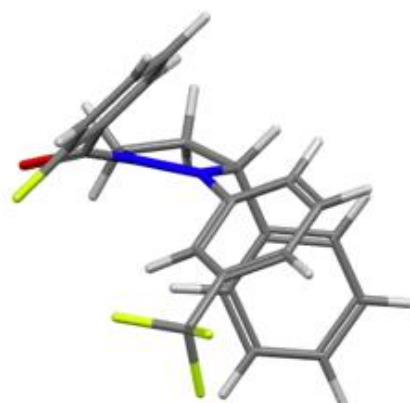

10d

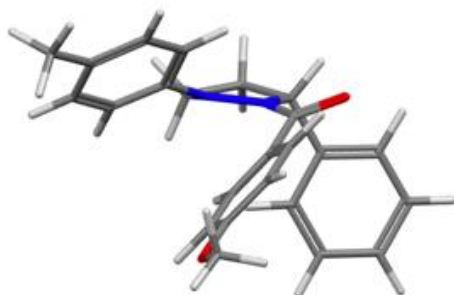

10e

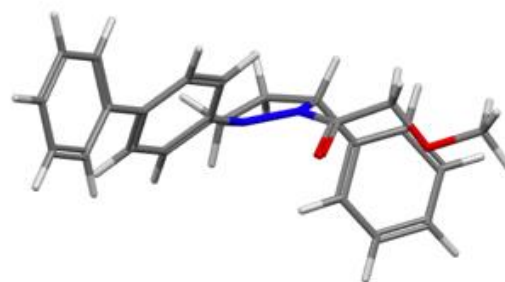

10f

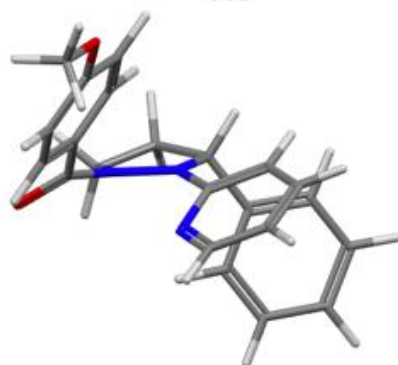

10g

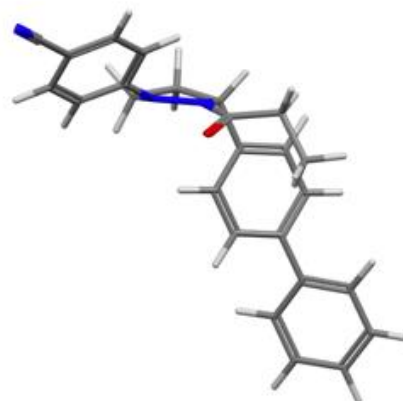

10h

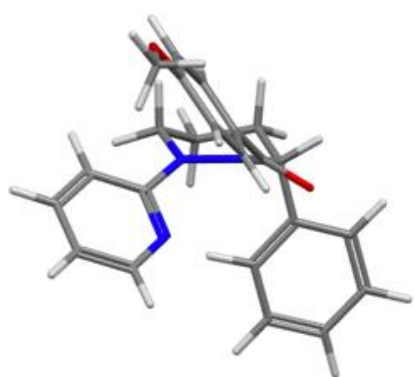

10i

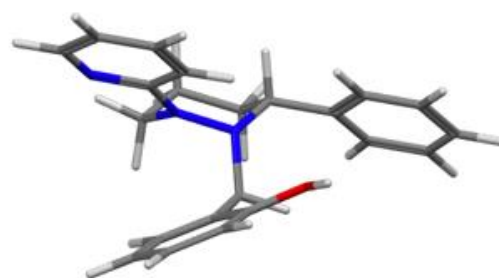

10j

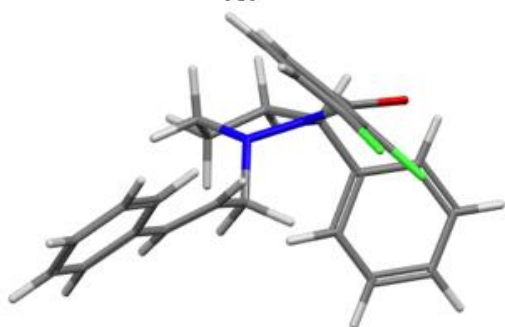

10k

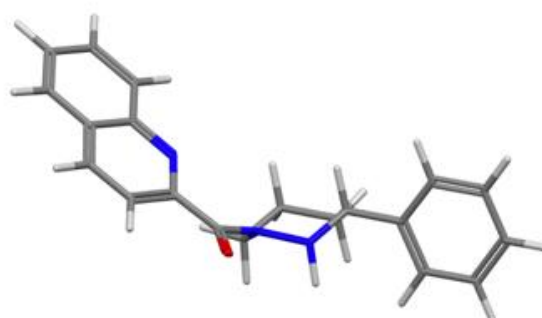

10l

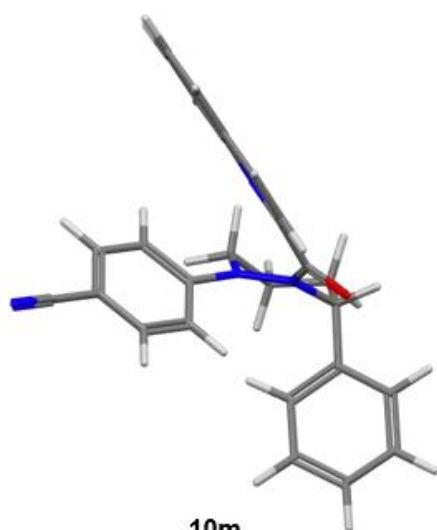

10m

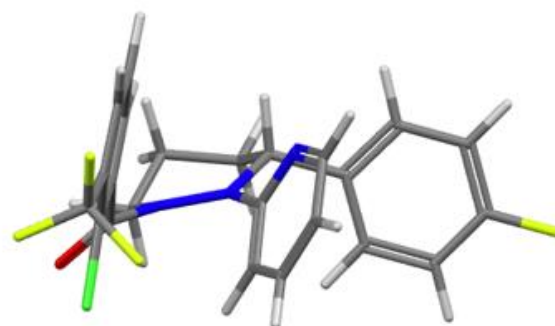

10n

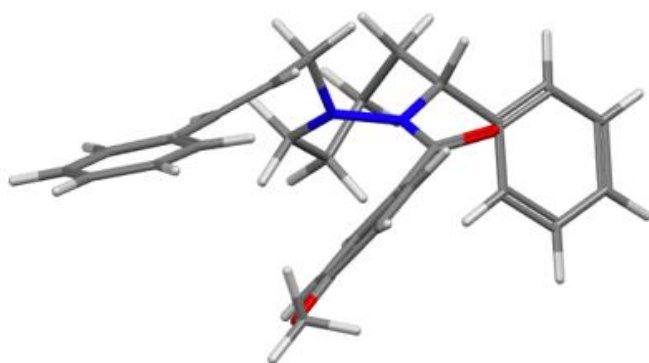

10o

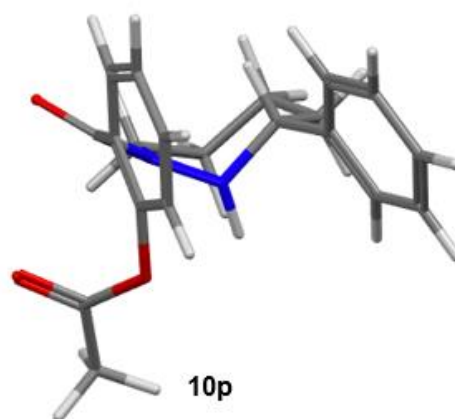

10p

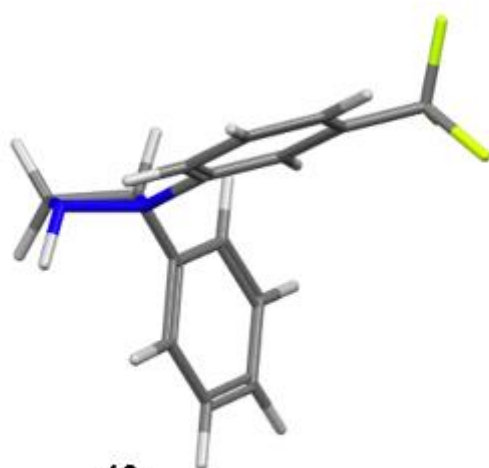

### Analysis of 10b by NOESY to Determine Solution State Configuration

**10b** was chosen for analysis by NOESY as a solid-state structure had already been obtained by X-ray diffraction (see page **S218**). In order to get a suitable NOESY spectrum the compound was first analysed by  $^1\text{H}$  NMR in order to find a suitable solvent that would resolve the numerous diastereotopic  $\text{CH}_2$  protons (labelled as  $\text{H}^7$ ,  $\text{H}^8$ ,  $\text{H}^9$ ,  $\text{H}^{10}$ ,  $\text{H}^{11}$  and  $\text{H}^{12}$  – see below).  $d_6$ -Benzene heated to 343 K on a 600 MHz spectrometer gave a suitable spectrum, which was assigned using a COSY. *N.B.* Complete assignment of diastereotopic protons was done in conjunction with NOESY data.

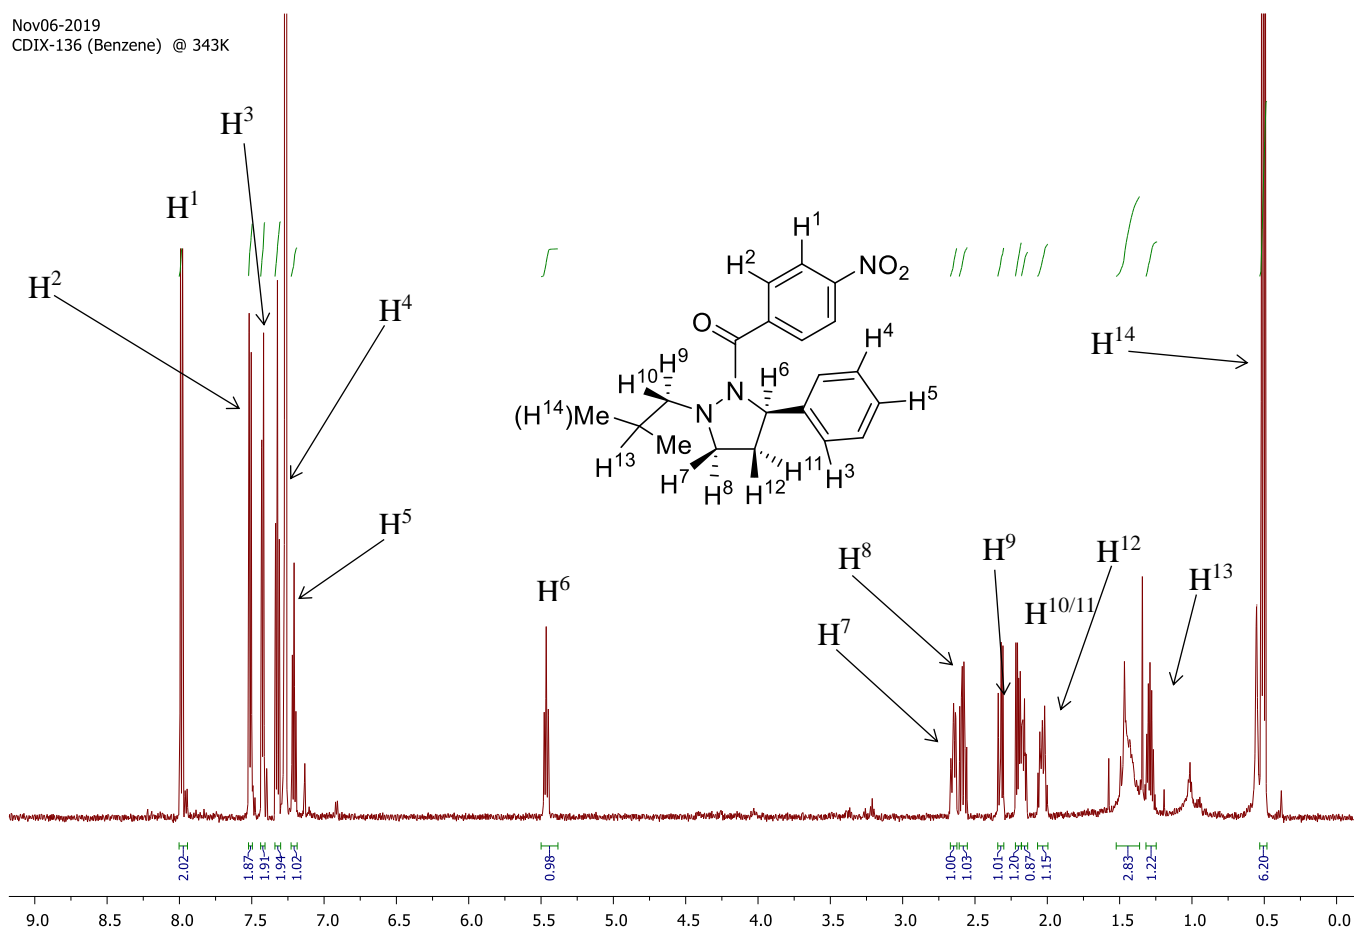

$\delta\text{H}$  (600 MHz,  $\text{C}_6\text{D}_6$  at 343 K) 7.99 (2H, d,  $J$  8.5,  $\text{H}^1$ ), 7.51 (2H, d,  $J$  8.4,  $\text{H}^2$ ), 7.42 (2H, d,  $J$  7.7,  $\text{H}^3$ ), 7.32 (2H, t,  $J$  7.6,  $\text{H}^4$ ), 7.21 (1H, t,  $J$  7.3,  $\text{H}^5$ ), 5.46 (1H, t,  $J$  8.4,  $\text{H}^6$ ), 2.67-2.63 (1H, m,  $\text{H}^7$ ), 2.58 (1H, td,  $J$  11.1, 6.7,  $\text{H}^8$ ), 2.32 (1H, dd,  $J$  11.8, 7.7,  $\text{H}^9$ ), 2.23-2.17 (2H, m,  $\text{H}^{10}$ ,  $\text{H}^{11}$ ), 2.03-1.99 (1H, m,  $\text{H}^{12}$ ), 1.29 (1H, septet,  $J$  7.2,  $\text{H}^{13}$ ), 0.51 (6H, dd,  $J$  9.0, 6.9,  $\text{H}^{14}$ ).

Analysis of the compound by NOESY showed several important NOE's which would be expected if the compound was in the *anti,anti*-configuration. An NOE between  $\text{H}^6$  and  $\text{H}^8$  confirmed that they are on the same face of the molecule (Figure **S4**, see also Figure **7**). An NOE is also observed between  $\text{H}^8$  and  $\text{H}^2$ , which shows that they are also on the same face. Taken together this gives evidence that  $\text{H}^6$  and  $\text{H}^8$  are on the opposite face of the molecule to the phenyl group, along with the *p*-methoxybenzoyl substituent.

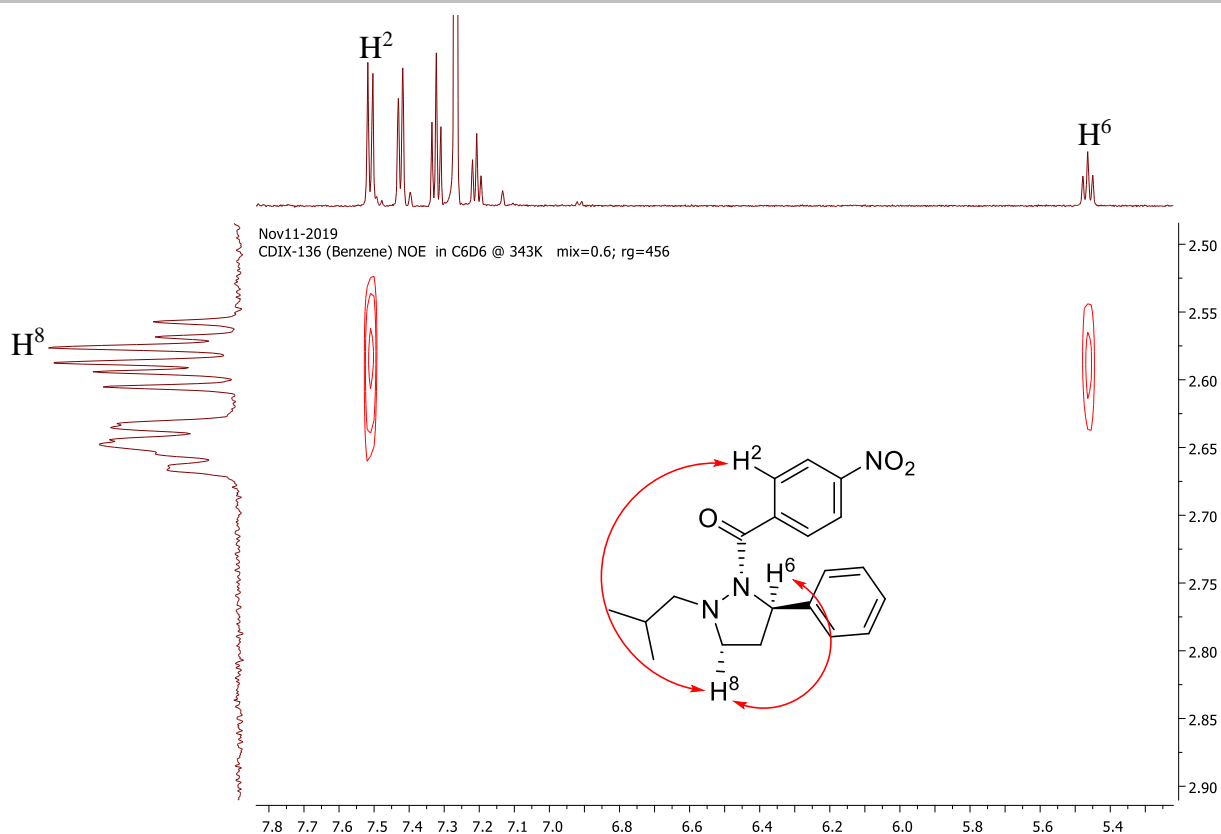

Figure S4 NOESY spectrum showing NOE's between H<sup>6</sup> to H<sup>8</sup> and H<sup>8</sup> to H<sup>2</sup>

Evidence for the position of the isobutyl group can also be seen (Figure S5, see also Figure 7). H<sup>3</sup> (of the phenyl group) shows an NOE to H<sup>9</sup> and possibly H<sup>10</sup>.

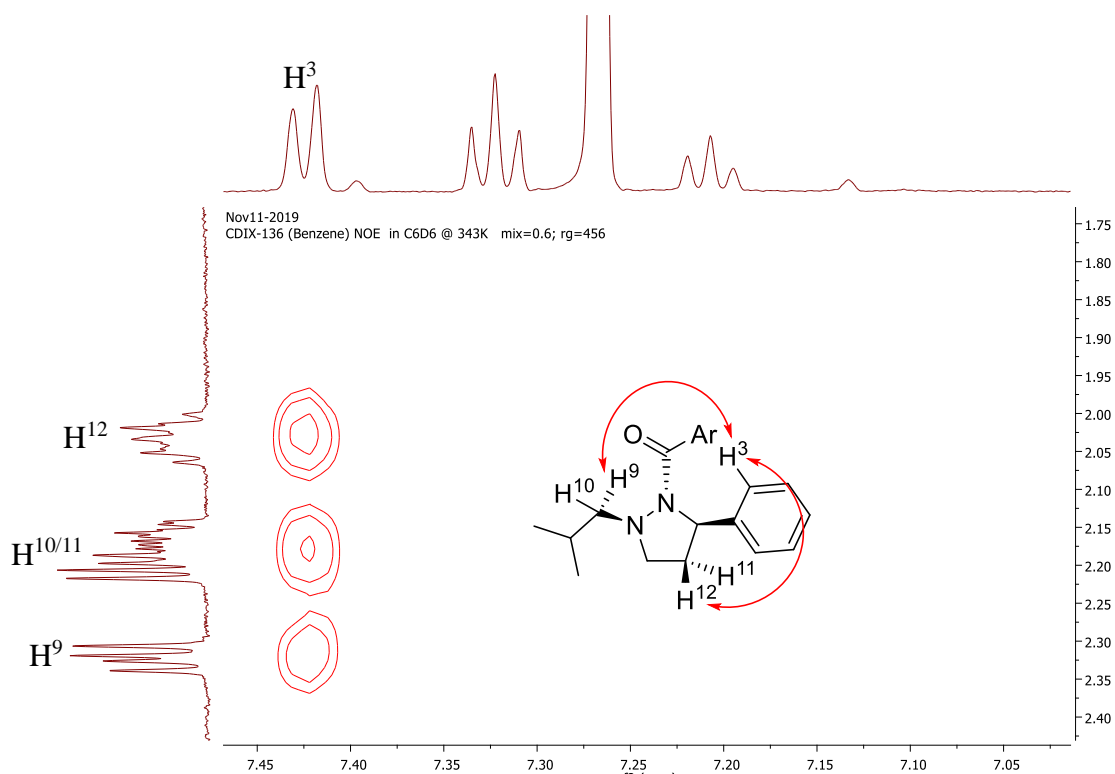

Figure S5 NOESY spectrum showing NOE's between H<sup>3</sup> and both H<sup>9</sup> and H<sup>12</sup>



H<sup>13</sup> also shows an NOE to H<sup>7</sup>, H<sup>7</sup> also NOE's to H<sup>12</sup> and H<sup>10</sup> (Figure S6). These are consistent with the assigned configuration

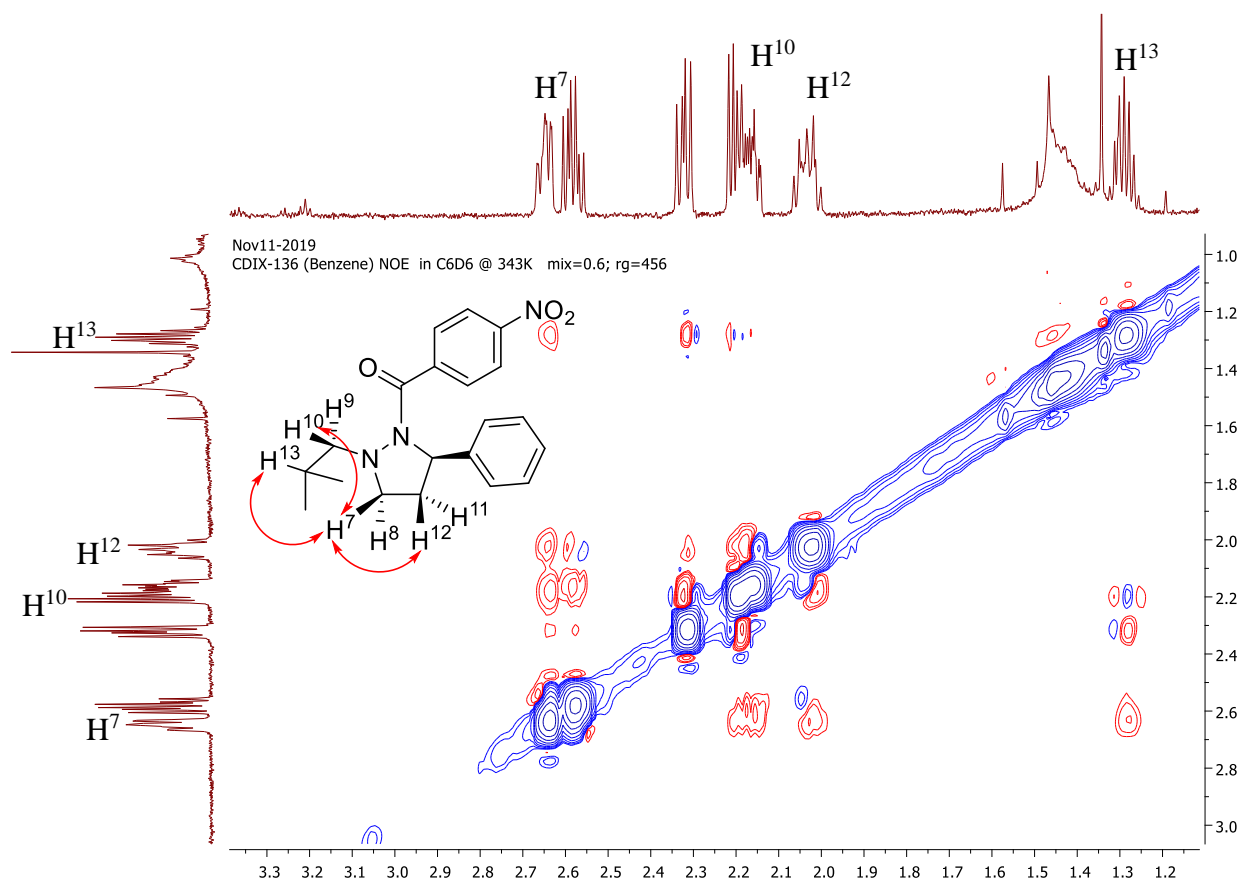

Figure S6 NOESY spectrum showing NOE's from H<sup>7</sup> to H<sup>12</sup>, H<sup>13</sup> and H<sup>10</sup>

### Low Temperature Analysis of 10b

Cooling sample to 233 K in both CDCl<sub>3</sub> (Figure S7) and d<sub>6</sub>-acetone gave a complex spectrum, which appeared to have one major isomer and two minor isomers in an approximately 84:11:5 ratio.

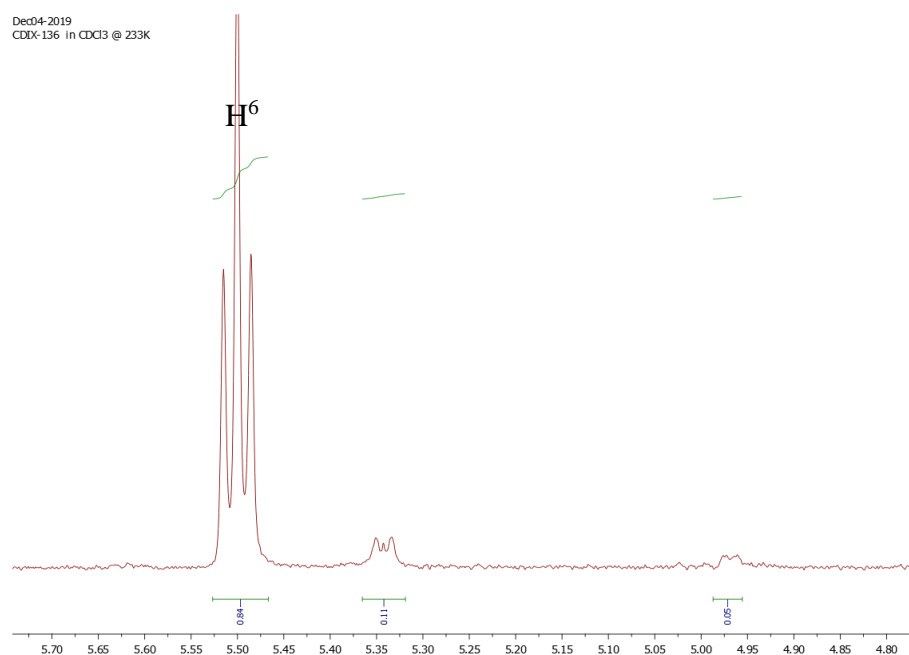

Figure S7 <sup>1</sup>H NMR spectrum of 10b showing the complex mixture of isomers obtained at 233 K (H<sup>6</sup>)

### Analysis of 10a by NOESY to Determine Solution State Configuration

**10a** was chosen for analysis by NOESY as a solid-state structure had already been obtained by X-ray diffraction (see page **S217**). Upon cooling to 233 K in CDCl<sub>3</sub> two isomers were observed in an a 56:44 ratio (see figure **S9**). Using the COSY and NOESY spectra, complete assignment of both isomers was completed (Figure **S8** and **S9**).

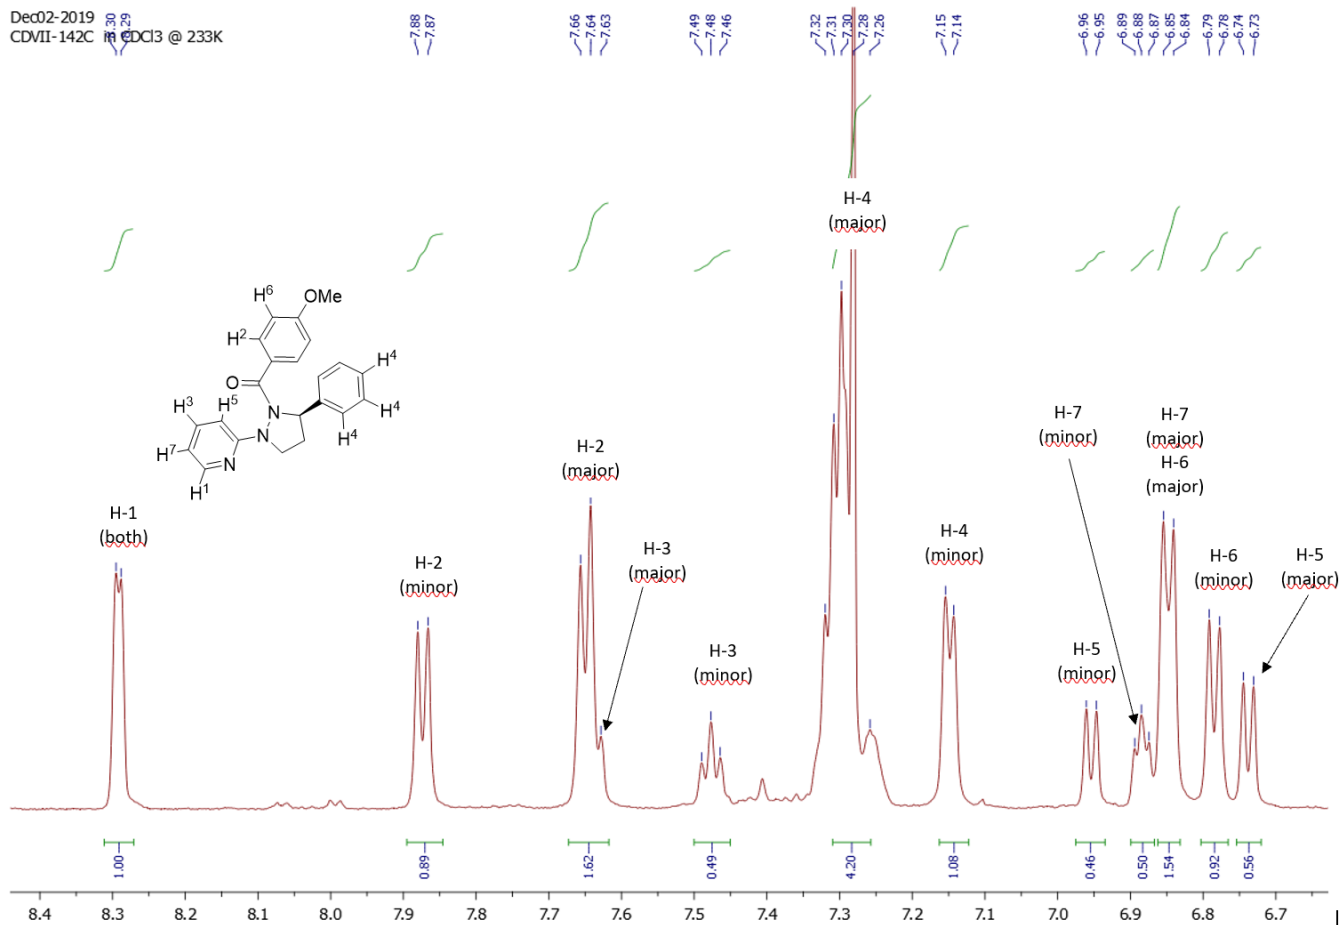

Figure **S8** <sup>1</sup>H NMR spectrum of **10a** in CDCl<sub>3</sub> at 233 K (aromatic protons)

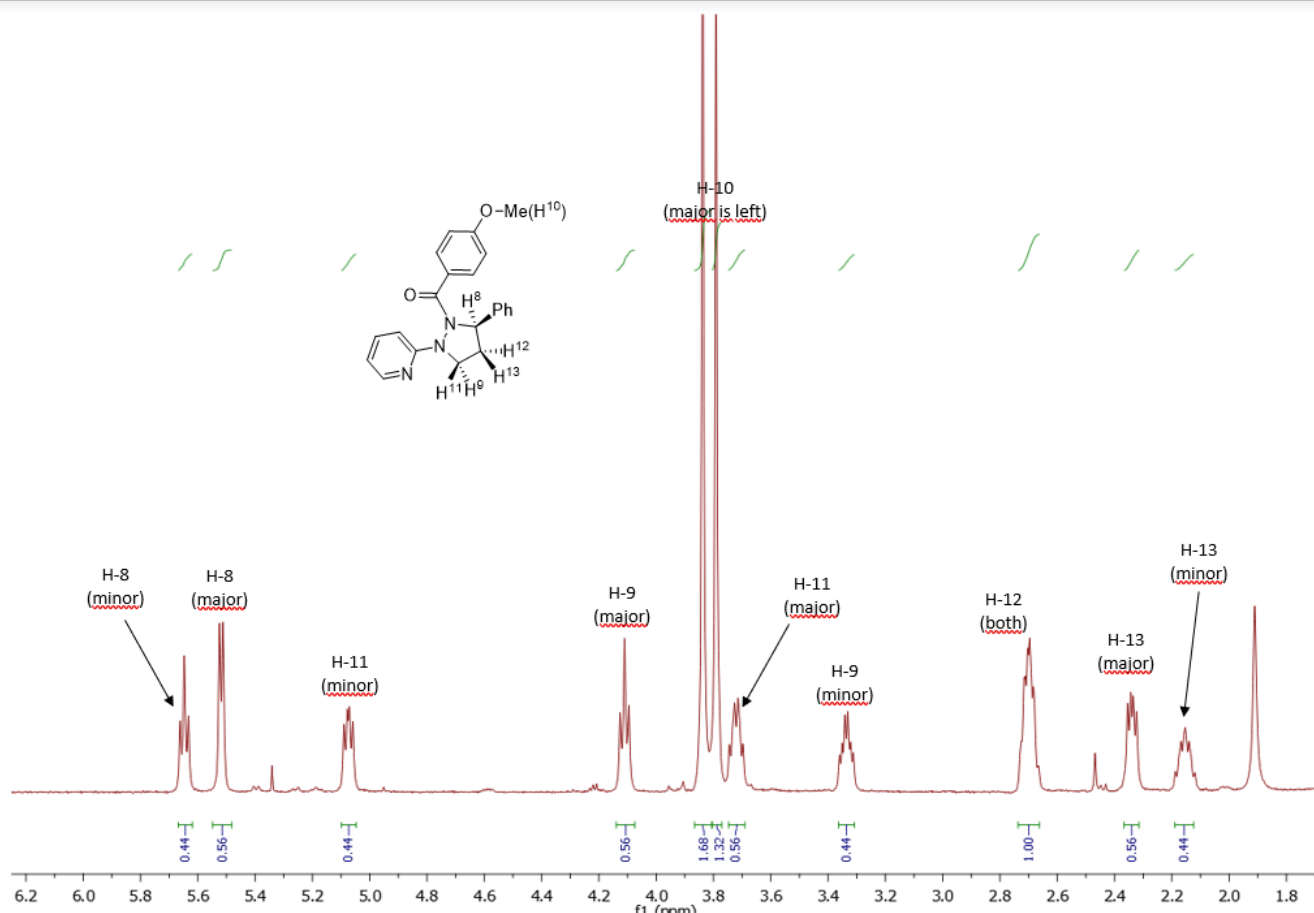

Figure S9  $^1\text{H}$  NMR of **10a** in  $\text{CDCl}_3$  at 233 K (aliphatic protons)

$\delta\text{H}$  (600 MHz,  $\text{CDCl}_3$  at 233 K) 8.29 (1Hx2, d,  $J$  4.0,  $\text{H}^1$  both), 7.87 (2H, d,  $J$  8.5,  $\text{H}^2$  minor), 7.66-7.61 (3H, m,  $\text{H}^2$  major and  $\text{H}^3$  major), 7.48 (1H, t,  $J$  7.7,  $\text{H}^3$  minor), 7.31-7.26 (5H, m,  $\text{H}^4$  major), 7.15 (5H, d,  $J$  6.8,  $\text{H}^4$  minor), 6.95 (1H, d,  $J$  8.3,  $\text{H}^5$  minor), 6.88 (1H, t,  $J$  4.0,  $\text{H}^7$  minor), 6.85 (3H, d,  $J$  8.4,  $\text{H}^6$  major,  $\text{H}^7$  major), 6.78 (2H, d,  $J$  8.5,  $\text{H}^6$  minor), 6.74 (1H,  $J$  8.4,  $\text{H}^5$  major), 5.64 (1H, t,  $J$  8.6,  $\text{H}^8$  minor), 5.52 (1H, d,  $J$  7.0,  $\text{H}^8$  major), 5.07 (1H, dd,  $J$  11.1, 7.3,  $\text{H}^{11}$  minor), 4.11 (1H, t,  $J$  9.1,  $\text{H}^9$  major), 3.84 (3H, s,  $\text{H}^{10}$  major), 3.79 (1H, s,  $\text{H}^{10}$  minor), 3.72 (1H, dd,  $J$  17.6, 10.4,  $\text{H}^{11}$  major), 3.33 (1H, td,  $J$  11.5, 5.7,  $\text{H}^9$  minor), 2.74-2.65 (1Hx2, m,  $\text{H}^{12}$  both), 2.34 (1H, dd,  $J$  11.9, 6.7,  $\text{H}^{13}$  major), 2.16 (1H, dd,  $J$  18.8, 10.7,  $\text{H}^{13}$  minor).

Analysis by NOESY was done in  $\text{CDCl}_3$  at 233 K. Initially a mixing time of 0.6 s was used and this gave a clear NOESY spectrum with a number of cross peaks. However, due to the long mixing time cross peaks were seen between major and minor isomers, suggesting that interconversion between isomers was occurring on this timescale. Reducing the mixing time to 0.3 s showed a clear NOE from  $\text{H}^2$  to  $\text{H}^8$  in the major isomer (**A**), which was not seen in the corresponding minor isomer (**B**) (Figure S10, see also Scheme 2).

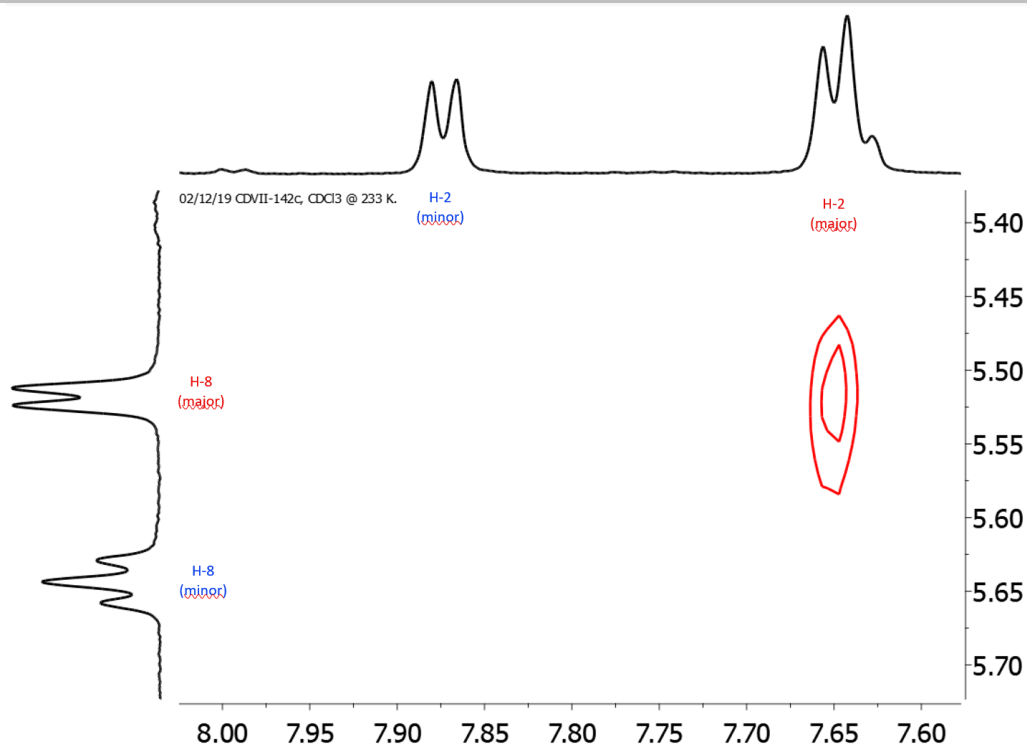

Figure S10 NOESY (0.3 s mix) of **10a** showing an NOE between  $H^8$  and  $H^2$  in the major isomer only

At the 0.3 s mixing time, no NOE's are seen from the pyridyl substituent and the rest of the molecule. At 0.6 s mixing time there is a weak NOE between  $H^4$  and  $H^5$  suggesting they are on the same face of the molecule (Figure S11). However, some caution needs to be applied as the two isomers **A** and **B** are interconverting under the experimental conditions.

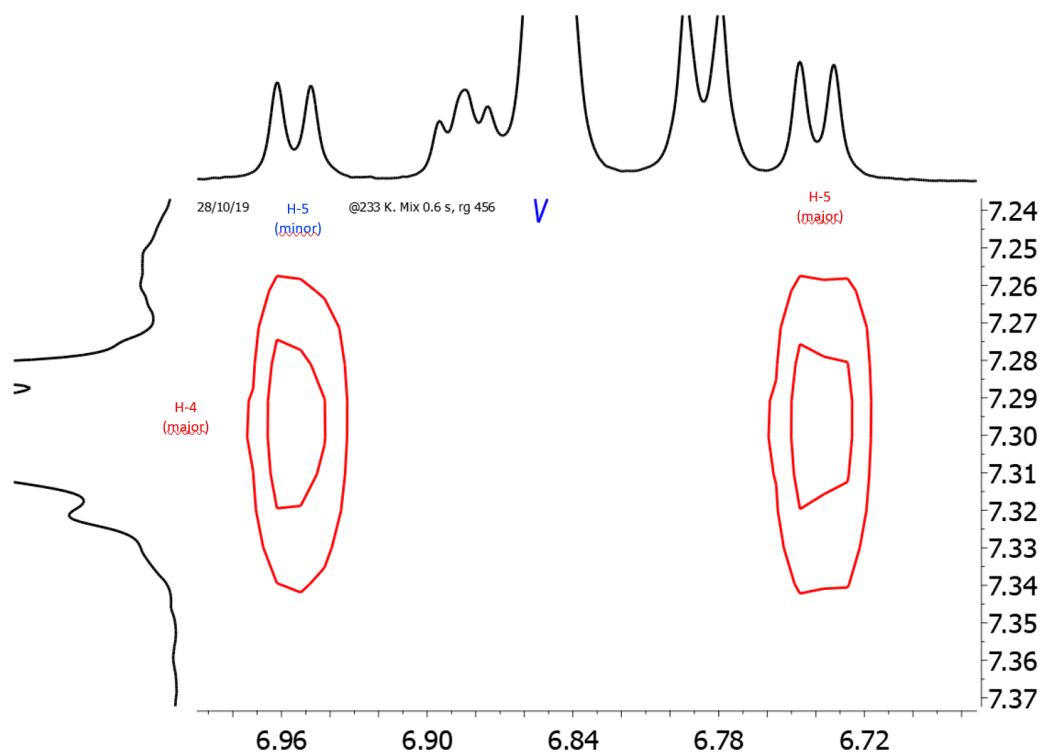

Figure S11 NOESY (0.6 s mix) spectrum of **10a** showing an NOE between  $H^4$  and both isomers of  $H^5$

### Calculation of Barrier to Inversion for 10a Using VT NMR

The barrier of inversion for **10a** was calculated using  $H^9$ . In order to calculate the coalescence temperature ( $T_c$ ) **10a** was analysed by VT NMR in  $CDCl_3$ . Spectra were collected from 223 K to 293 K in 10 K increments (Figure S12).

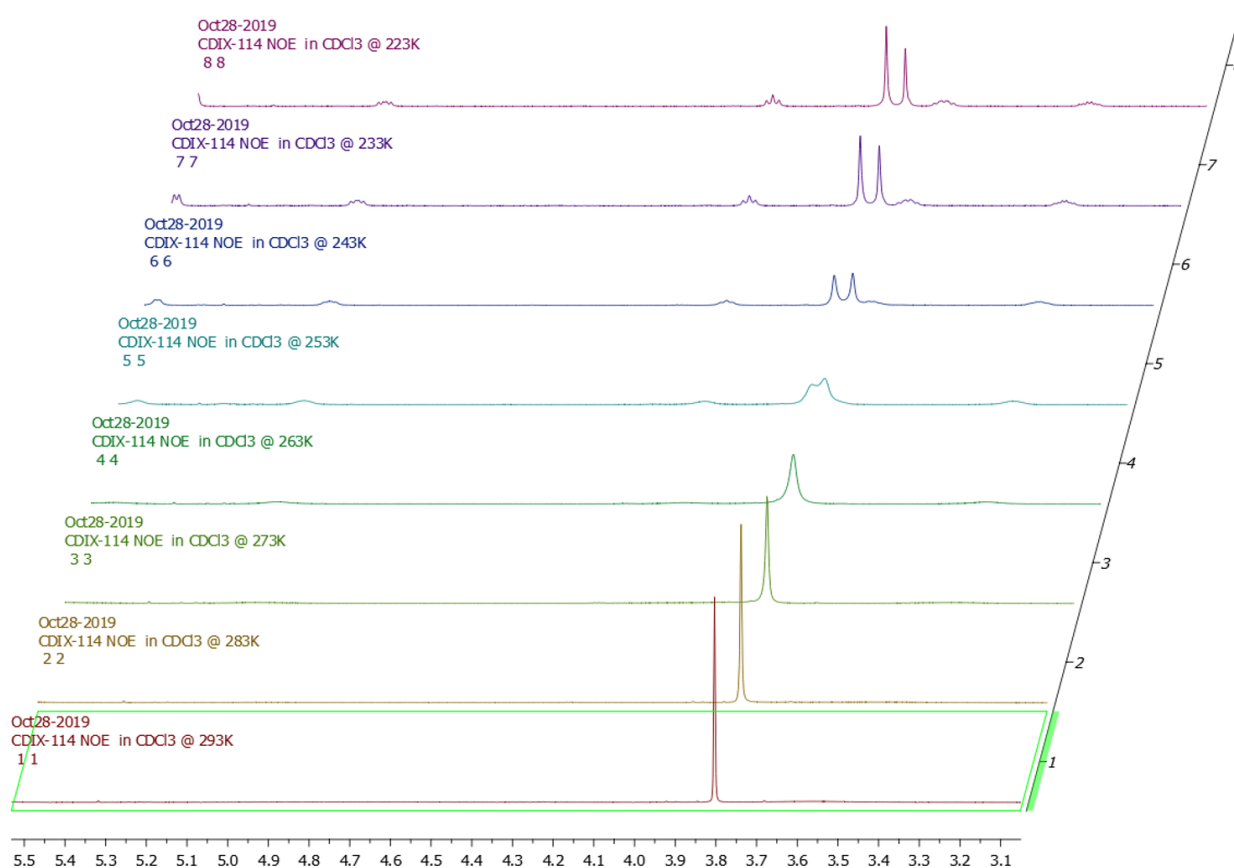

Figure S12 VT  $^1H$  NMR analysis of **10a** to show the coalescence of  $H^9$

From this  $T_c$  was estimated to be 258 K, which was used to calculate  $\Delta G_A^\ddagger$ :

The barrier to inversion was calculated using Eyring's equations, modified by Shanan Atidi and Bar-Eli to account for unequal populations of isomers.<sup>[13]</sup>

$$\Delta G_A^\ddagger = RT_c \left[ 10.62 + \log \frac{X}{2\pi(1-\Delta P)} + \log \frac{T_c}{\Delta \nu} \right]$$

$R = 4.57 \text{ cal mol}^{-1} \text{ K}^{-1}$ ,  $T_c = 258 \text{ K}$ ,  $\Delta \nu = 30 \text{ Hz}$  (peak difference is 0.05 ppm on a 600 MHz spectrometer),  $\log \frac{X}{2\pi(1-\Delta P)} = -0.567$

$$\Delta G_A^\ddagger = 12.9 \text{ kcal mol}^{-1} = 54.1 \text{ kJ mol}^{-1}$$

---

## References

- [1] L. Grehn, B. Nyasse, U. Ragnarsson, *Synthesis* **1997**, 1429–1432.
- [2] F. J.-J. Bihel, M. Hellal, J.-J. Bourgignon, *Synthesis* **2007**, 3791–3796.
- [3] L. Grehn, T. Pehk, U. Ragnarsson, *Tetrahedron Lett.* **2014**, 55, 7019–7022.
- [4] F. Yu, J.-N. Zhou, X.-C. Zhang, Y.-Z. Sui, F.-F. Wu, L.-J. Xie, A. S. C. Chan, J. Wu, *Chem. Eur. J.* **2011**, 17, 14234–14240.
- [5] M. Salla, M. S. Butler, R. Pelingon, G. Kaeslin, D. E. Croker, J. C. Reid, J. M. Baek, P. V. Bernhardt, E. M. J. Gillam, M. A. Cooper, A. A. B. Robertson, *ACS Med. Chem. Lett.* **2016**, 7, 1034–1038.
- [6] S. Orgies, A. Breder, *Org. Lett.* **2015**, 17, 2748–2751.
- [7] C. Gronnier, S. Kramer, Y. Odabachian, F. Gagosz, *J. Am. Chem. Soc.* **2012**, 134, 828–831.
- [8] S. K. Murphy, V. M. Dong, *J. Am. Chem. Soc.* **2013**, 135, 5553–5556.
- [9] J. S. Zhou, G. C. Fu, *J. Am. Chem. Soc.* **2003**, 125, 14726–14727.
- [10] F. S. Davis, L. Huang, L. Bauer, *J. Heterocyclic Chem.* **1995**, 32, 915–920.
- [11] D. Wang, J. Mao, C. Zhu, *Chem. Sci.* **2018**, 9, 5205–5809.
- [12] I. Colomer, C. J. Empson, P. Craven, Z. Owen, R. G. Doveston, I. Churcher, S. P. Marsden, A. Nelson, *Chem. Commun.*, **2016**, 52, 7209–7212.
- [13] H. Shanan-Atidi, K. H. Bar-Eli, *J. Phys. Chem.* **1970**, 74, 961–963.
